# Supplementary material
Source: PubMed Central journal article supplement (PMC7830113)
Supplement: ja0c12042_si_003.pdf [file ja0c12042_si_003.pdf]

# Strong and Confined Acids Catalyze Asymmetric Intramolecular Hydroarylations of Unactivated Olefins with Indoles

Pinglu Zhang, Nobuya Tsuji, Jie Ouyang, and Benjamin List\*

Max-Planck-Institut für Kohlenforschung, Kaiser-Wilhelm-Platz 1, 45470 Mülheim an der Ruhr, Germany  
Institute for Chemical Reaction Design and Discovery (WPI-ICReDD), Hokkaido University, Sapporo 001-0021, Japan.

## Table of Contents

|                                                              |      |
|--------------------------------------------------------------|------|
| 1. General information.....                                  | S3   |
| 2. General procedure of the asymmetric hydroarylations ..... | S4   |
| 3. Synthetic applications .....                              | S13  |
| 4. Synthesis of catalysts .....                              | S16  |
| 5. Preparation of substrates .....                           | S23  |
| 6. Control experiments .....                                 | S51  |
| 7. NMR study .....                                           | S55  |
| 8. X-Ray analysis.....                                       | S56  |
| 9. NMR spectra .....                                         | S71  |
| 10. HPLC traces.....                                         | S198 |
| 11. Reference and notes .....                                | S227 |

## 1. General information

Unless otherwise stated, all reactions were magnetically stirred and conducted in oven-dried (80 °C) or flame-dried glassware in anhydrous solvents under Ar, applying standard Schlenk techniques. Solvents and liquid reagents, as well as solutions of solid or liquid reagents were added via syringes, stainless steel or polyethylene cannulas through rubber septa or through a weak Ar counter-flow. Solid reagents were added through a weak Ar counter-flow. Cooling baths were prepared in Dewar vessels, filled with ice/water (0 °C), cooled acetone (> -78 °C) or dry ice/acetone (-78 °C). Heated oil baths were used for reactions requiring elevated temperatures. Solvents were removed under reduced pressure at 40 °C using a rotary evaporator, and unless otherwise stated, the remaining compound was dried in high vacuum ( $10^{-3}$  mbar) at ambient temperature. All given yields are isolated yields of chromatographically and NMR spectroscopically pure materials, unless otherwise stated.

### Chemicals

Chemicals were purchased from commercial suppliers (including abcr, Acros, Alfa Aesar, Fluorochem, TCI and Sigma-Aldrich) and used without further purification unless otherwise stated.

### Solvents

Solvents ( $\text{CH}_2\text{Cl}_2$ ,  $\text{CHCl}_3$ ,  $\text{Et}_2\text{O}$ , THF, toluene) were dried by distillation from an appropriate drying agent in the technical department of the Max-Planck-Institut für Kohlenforschung and received in Schlenk flasks under argon. In addition, more solvents (acetone, benzene, cyclohexane, methylcyclohexane, 1,4-dioxane, DMF, DMSO, EtOAc, EtOH, MeCN, MeOH, MTBE, *n*-hexane, *n*-heptane, *n*-pentane, methylene) were purchased from commercial suppliers and dried over molecular sieves.

### Inert Gas

Dry argon was purchased from Air Liquide with > 99.5% purity.

### Thin Layer chromatography

Thin-layer chromatography (TLC) was performed using silica gel pre-coated glass plates (SIL G-25, with fluorescent indicator UV254; Macherey-Nagel) and aluminium oxide pre-coated plastic sheets (Polygram ALOx N, 0.2 mm, with fluorescent indicator UV254; Macherey-Nagel), which were visualized by irradiation with UV light ( $\lambda = 254$  or  $366$  nm), basic  $\text{KMnO}_4$ , and/or phosphomolybdic acid (PMA). Preparative thin-layer chromatography was performed on silica gel pre-coated glass plates SIL G-100, with fluorescent indicator UV254 (Macherey-Nagel).

### Column Chromatography

Column chromatography (CC) was carried out using Merck silica gel (60 Å, 230–400 mesh, particle size 0.040–0.063 mm) using technical grade solvents. Elution was accelerated using compressed air. All reported yields, unless otherwise specified, refer to spectroscopically and chromatographically pure compounds.

### Nuclear Magnetic Resonance Spectroscopy

$^1\text{H}$ ,  $^{13}\text{C}$ ,  $^{19}\text{F}$ ,  $^{31}\text{P}$  nuclear magnetic resonance (NMR) spectra were recorded on a Bruker AV-500, AV-400 spectrometer in a suitable deuterated solvent. The solvent employed and respective measuring frequency are indicated for each experiment. Chemical shifts are reported with

tetramethylsilane (TMS) serving as a universal reference of all nuclides and with two or one digits after the comma. The resonance multiplicity is described as s (singlet), d (doublet), t (triplet), q (quartet), m (multiplet), and bs (broad singlet). All spectra were recorded at 298 K unless otherwise noted, processed with program MestReNova 14.0, and coupling constants are reported as observed. The residual deuterated solvent signal relative to tetramethylsilane (TMS) was used as the internal reference in  $^1\text{H}$  NMR spectra ( $\text{CDCl}_3$   $\delta$  7.26,  $\text{CD}_2\text{Cl}_2$   $\delta$  5.32,  $\text{C}_6\text{D}_6$   $\delta$  7.16,  $\text{CD}_3\text{OD}$   $\delta$  3.31), and are reported as follows: chemical shift  $\delta$  in ppm (multiplicity, coupling constant  $J$  in Hz, number of protons).  $^{13}\text{C}$  NMR spectra reported in ppm from tetramethylsilane (TMS) with the solvent resonance as the internal standard ( $\text{CDCl}_3$   $\delta$  77.2,  $\text{CD}_2\text{Cl}_2$   $\delta$  53.8,  $\text{C}_6\text{D}_6$   $\delta$  128.1,  $\text{CD}_3\text{OD}$   $\delta$  49.0). All spectra are broadband decoupled unless otherwise noted.

### Mass Spectrometry

Electron impact (EI) mass spectrometry (MS) was performed on a Finnigan MAT 8200 (70 eV) or MAT 8400 (70 eV) spectrometer. Electrospray ionization (ESI) mass spectrometry was conducted on a Bruker ESQ 3000 spectrometer. High resolution mass spectrometry (HRMS) was performed on a Finnigan MAT 95 (EI) or Bruker APEX III FTMS (7T magnet, ESI). The ionization method and mode of detection employed is indicated for the respective experiment and all masses are reported in atomic units per elementary charge ( $m/z$ ) with an intensity normalized to the most intense peak.

### High Performance Liquid Chromatography

High performance liquid chromatography (HPLC) was performed on Shimadzu LC-20AD liquid chromatograph (SIL-20AC auto sampler, CMB-20A communication bus module, DGU-20A5 degasser, CTO-20AC column oven, SPD-M20A diode array detector), Shimadzu LC-20AB liquid chromatograph (SIL-20ACHT auto sampler, DGU-20A5 degasser, CTO-20AC column oven, SPD-M20A diode array detector), or Shimadzu LC-20AB liquid chromatograph (reversed phase, SIL-20ACHT auto sampler, CTO-20AC column oven, SPD-M20A diode array detector) using Daicel columns with a chiral stationary phase. All solvents used were HPLC-grade solvents purchased from Sigma-Aldrich. The column employed and respective solvent mixture are indicated for each experiment.

## 2. General procedure of the asymmetric hydroarylations

The initial screening conditions including concentration and solvents were originated from our recent paper in enantioselective hydroalkoxylations of unactivated olefins.<sup>1</sup> Catalysts and temperature screenings were shown in the main text, **Table 1**.

Racemates were prepared by using 5 mol% of 3,3'-bis(3,5-bis(trifluoromethyl)phenyl)-[1,1'-binaphthalene]-2,2'-dinaphthyl-N,N'-bis-((trifluoromethyl)sulfonyl)phosphoramidimidate<sup>2</sup> (racemate) in toluene at 110 °C.

**General procedure of the catalytic asymmetric hydroarylation:** A Schlenk tube equipped with an aluminum foil was charged with IDPi **7e** (2 mol%) under argon, substrate **1** (0.1 mmol to 0.2 mmol) and cyclohexane (0.1 M) were added at room temperature. The resulting solution was heated at 60 °C for 2 days and the reaction was monitored by TLC. After full consumption of the starting material, the reaction mixture was diluted with pentane and purified by silica gel column chromatography (Pentane:Et<sub>2</sub>O = 30:1 to 10:1) to afford the desired product.

(*R*)-1-butyl-1-methyl-2,3,4,9-tetrahydro-1*H*-carbazole (**2a**)

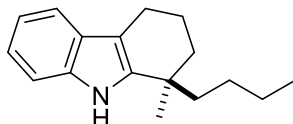

0.15 mmol scale, s.m.(starting material, the same as following) 36 mg, obtain product 35 mg, 97% yield, colorless oil, e.r. 95:5.

**<sup>1</sup>H NMR** (501 MHz, CDCl<sub>3</sub>) δ 7.71 (bs, 1H), 7.49 (d, *J* = 7.7 Hz, 1H), 7.32 (d, *J* = 8.0 Hz, 1H), 7.15 (td, *J* = 7.0, 1.3 Hz, 1H), 7.10 (td, *J* = 7.4, 1.2 Hz, 1H), 2.79–2.60 (m, 2H), 2.01–1.80 (m, 3H), 1.73–1.54 (m, 3H), 1.37–1.17 (m, 7H), 0.91 (t, *J* = 7.1 Hz, 3H).

**<sup>13</sup>C NMR** (126 MHz, CDCl<sub>3</sub>) δ 141.5, 135.8, 127.8, 121.2, 119.1, 118.2, 110.5, 109.7, 41.9, 36.1, 34.7, 27.6, 26.9, 23.6, 21.5, 20.3, 14.3.

**HRMS** (ESI) (*m/z*): calculated for C<sub>17</sub>H<sub>23</sub>N<sub>1</sub> [*M*]<sup>+</sup>: 241.1825; found 241.1831.

The enantiomeric ratio was measured by HPLC analysis using following parameters: Daicel Chiralcel IB-3 column: *n*Hept:*i*PrOH = 95:5, flow rate 0.7 mL/ min, *t*<sub>major</sub> = 7.2 min, *t*<sub>minor</sub> = 9.9 min.

[α]<sub>D</sub><sup>25</sup> = −15.0 (c 0.24, THF)

(*R*)-1-methyl-1-pentyl-2,3,4,9-tetrahydro-1*H*-carbazole (**2b**)

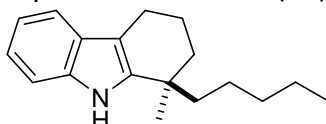

0.15 mmol, s.m. 38 mg, obtain 37 mg, 97% yield, colorless oil, e.r. 95:5.

**<sup>1</sup>H NMR** (501 MHz, CDCl<sub>3</sub>) δ 7.70 (bs, 1H), 7.50 (dd, *J* = 7.6, 1.2 Hz, 1H), 7.32 (d, *J* = 7.8 Hz, 1H), 7.16 (td, *J* = 7.1, 1.4 Hz, 1H), 7.11 (td, *J* = 7.4, 1.2 Hz, 1H), 2.83–2.58 (m, 2H), 2.04–1.79 (m, 3H), 1.73–1.58 (m, 4H), 1.46–1.16 (m, 8H), 0.91 (t, *J* = 7.0 Hz, 3H).

**<sup>13</sup>C NMR** (126 MHz, CDCl<sub>3</sub>) δ 141.5, 135.8, 127.8, 121.1, 119.1, 118.2, 110.5, 109.7, 42.2, 36.1, 34.7, 32.8, 27.6, 24.4, 22.8, 21.5, 20.3, 14.3.

**HRMS** (ESI) (*m/z*): calculated for C<sub>18</sub>H<sub>25</sub>N<sub>1</sub> [*M*]<sup>+</sup>: 255.1982; found 255.1983.

The enantiomeric ratio was measured by HPLC analysis using following parameters: Daicel Chiralcel IB-3 column: *n*Hept:*i*PrOH = 95:5, flow rate 0.7 mL/ min, *t*<sub>major</sub> = 7.0 min, *t*<sub>minor</sub> = 9.4 min.

[α]<sub>D</sub><sup>25</sup> = − 18.9 (c 0.71, THF)

(*R*)-1-methyl-1-propyl-2,3,4,9-tetrahydro-1*H*-carbazole (**2c**)

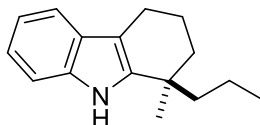

0.15 mmol, s.m. 34 mg, obtain 33 mg, 97% yield, colorless oil, e.r. 94:6.

**<sup>1</sup>H NMR** (501 MHz, CDCl<sub>3</sub>) δ 7.69 (bs, 1H), 7.49 (d, *J* = 7.6 Hz, 1H), 7.31 (d, *J* = 8.1 Hz, 1H), 7.14 (td, *J* = 7.1, 1.3 Hz, 1H), 7.09 (td, *J* = 7.1, 1.1 Hz, 1H), 2.80–2.61 (m, 2H), 2.01–1.80 (m, 3H), 1.72–1.52 (m, 3H), 1.44–1.19 (m, 5H), 0.92 (t, *J* = 7.3 Hz, 3H).

**<sup>13</sup>C NMR** (126 MHz, CDCl<sub>3</sub>) δ 141.4, 135.8, 127.8, 121.1, 119.1, 118.2, 110.5, 109.7, 44.6, 36.2, 34.8, 27.6, 21.5, 20.3, 18.0, 15.0.

**HRMS** (ESI) (*m/z*): calculated for C<sub>16</sub>H<sub>21</sub>N<sub>1</sub> [*M*]<sup>+</sup>: 227.1668; found 227.1670.

The enantiomeric ratio was measured by HPLC analysis using following parameters: Daicel Chiralcel IB-3 column: *n*Hept:*i*PrOH = 95:5, flow rate 0.7 mL/ min, *t*<sub>major</sub> = 7.5 min, *t*<sub>minor</sub> = 9.8 min.

$[\alpha]_D^{25} = -16.7$  (c 0.24, THF)

(R)-1-ethyl-1-methyl-2,3,4,9-tetrahydro-1H-carbazole (**2d**)

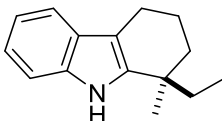

0.15 mmol, s.m. 32 mg, obtain 30 mg, 95% yield, colorless oil, e.r. 84:16.

$^1\text{H NMR}$  (501 MHz,  $\text{CDCl}_3$ )  $\delta$  7.69 (bs, 1H), 7.48 (d,  $J = 7.6$  Hz, 1H), 7.29 (d,  $J = 7.6$  Hz, 1H), 7.14–7.03 (m, 2H), 2.81–2.61 (m, 2H), 2.04–1.80 (m, 3H), 1.70 (q,  $J = 7.5$  Hz, 2H), 1.63–1.55 (m, 1H), 1.29 (s, 3H), 0.88 (t,  $J = 7.5$  Hz, 3H).

$^{13}\text{C NMR}$  (126 MHz,  $\text{CDCl}_3$ )  $\delta$  141.3, 135.8, 129.2, 128.4, 121.1, 119.1, 118.2, 110.5, 35.4, 34.9, 34.4, 27.1, 21.5, 20.2.

**HRMS** (ESI) (m/z): calculated for  $\text{C}_{15}\text{H}_{19}\text{N}_1$   $[\text{M}]^+$ : 213.1512; found 213.1512.

The enantiomeric ratio was measured by HPLC analysis using following parameters: Daicel Chiralcel IB-3 column: *n*Hept:*i*PrOH = 95:5, flow rate 0.7 mL/min,  $t_{\text{major}} = 7.8$  min,  $t_{\text{minor}} = 9.4$  min.

$[\alpha]_D^{25} = -10.7$  (c 0.12, THF)

(S)-1-isopentyl-1-methyl-2,3,4,9-tetrahydro-1H-carbazole (**2e**)

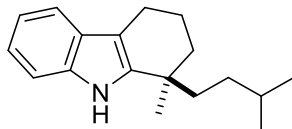

0.1 mmol, s.m. 26 mg, obtain 24.2 mg, 93% yield, colorless oil, e.r. 97:3.

$^1\text{H NMR}$  (501 MHz,  $\text{CDCl}_3$ )  $\delta$  7.70 (bs, 1H), 7.50 (d,  $J = 7.4$  Hz, 1H), 7.32 (d,  $J = 7.9$  Hz, 1H), 7.15 (td,  $J = 8.0, 1.1$  Hz, 1H), 7.11 (td,  $J = 8.0, 1.1$  Hz, 1H), 2.76–2.66 (m, 2H), 2.02–1.79 (m, 3H), 1.67–1.62 (m, 3H), 1.57–1.45 (m, 1H), 1.31 (s, 3H), 1.28–1.18 (m, 1H), 1.17–1.05 (m, 1H), 0.90 (t,  $J = 6.1$  Hz, 6H).

$^{13}\text{C NMR}$  (126 MHz,  $\text{CDCl}_3$ )  $\delta$  141.5, 135.8, 127.8, 121.1, 119.1, 118.2, 110.6, 109.7, 39.8, 36.0, 34.6, 33.6, 28.9, 27.8, 22.8, 21.5, 20.3.

**HRMS** (ESI) (m/z): calculated for  $\text{C}_{18}\text{H}_{26}\text{N}_1$   $[\text{M}+\text{H}]^+$ : 256.2060; found 256.2057.

The enantiomeric ratio was measured by HPLC analysis using following parameters: Daicel Chiralcel IB-3 column: *n*Hept:*i*PrOH = 95:5, flow rate 0.7 mL/min,  $t_{\text{major}} = 6.6$  min,  $t_{\text{minor}} = 9.3$  min.

$[\alpha]_D^{25} = -31.2$  (c 0.41, THF)

(S)-1-(3,3-dimethylbutyl)-1-methyl-2,3,4,9-tetrahydro-1H-carbazole (**2f**)

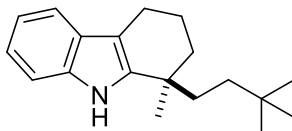

0.1 mmol, s.m. 27 mg, obtain 26 mg, 97% yield, colorless oil, e.r. 98:2.

$^1\text{H NMR}$  (501 MHz,  $\text{CDCl}_3$ )  $\delta$  7.69 (bs, 1H), 7.48 (d,  $J = 7.6$  Hz, 1H), 7.32 (dt,  $J = 8.0, 0.9$  Hz, 1H), 7.13 (td,  $J = 7.1, 1.3$  Hz, 1H), 7.09 (td,  $J = 7.1, 1.1$  Hz, 1H), 2.79–2.55 (m, 2H), 1.99–1.79 (m, 3H), 1.68–1.56 (m, 3H), 1.34–1.18 (m, 4H), 1.13–1.05 (m, 1H), 0.88 (s, 9H).

$^{13}\text{C NMR}$  (126 MHz,  $\text{CDCl}_3$ )  $\delta$  141.6, 135.8, 127.8, 121.1, 119.2, 118.2, 110.6, 109.7, 38.3, 36.4, 35.7, 34.5, 30.3, 29.5, 27.6, 21.5, 20.3.

**HRMS** (ESI) (m/z): calculated for  $\text{C}_{19}\text{H}_{27}\text{N}_1$   $[\text{M}]^+$ : 269.2138; found 269.2142.

The enantiomeric ratio was measured by HPLC analysis using following parameters: Daicel Chiralcel IB-3 column: *n*Hept:*i*PrOH = 95:5, flow rate 0.7 mL/ min,  $t_{\text{major}}$  = 6.2 min,  $t_{\text{minor}}$  = 8.9 min.

$[\alpha]_{\text{D}}^{25} = -10.0$  (*c* 0.5, THF)

(*S*)-1-methyl-1-phenethyl-2,3,4,9-tetrahydro-1*H*-carbazole (**2g**)

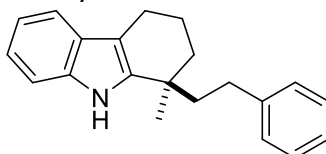

0.15 mmol, s.m. 43 mg, obtain 41 mg, 95% yield, white solid, e.r. 96:4.

$^1\text{H NMR}$  (501 MHz,  $\text{CDCl}_3$ )  $\delta$  7.60 (bs, 1H), 7.40 (d,  $J$  = 7.6 Hz, 1H), 7.23–7.13 (m, 2H), 7.11–6.97 (m, 6H), 2.72–2.49 (m, 3H), 2.41 (ddd,  $J$  = 13.5, 11.7, 5.2 Hz, 1H), 1.97–1.74 (m, 5H), 1.68–1.56 (m, 1H), 1.28 (s, 3H).

$^{13}\text{C NMR}$  (126 MHz,  $\text{CDCl}_3$ )  $\delta$  142.8, 140.7, 135.9, 128.5, 128.4, 127.8, 125.9, 121.3, 119.2, 118.3, 110.6, 110.2, 44.2, 36.0, 35.0, 31.3, 27.7, 21.5, 20.3.

**HRMS** (EI) ( $m/z$ ): calculated for  $\text{C}_{21}\text{H}_{23}\text{N}_1$   $[\text{M}]^+$ : 289.1825; found 289.1825.

The enantiomeric ratio was measured by HPLC analysis using following parameters: Daicel Chiralcel OD-3 column: *n*Hept:*i*PrOH = 95 : 5, flow rate 0.7 mL/ min,  $t_{\text{major}}$  = 12.2 min,  $t_{\text{minor}}$  = 20.3 min.

$[\alpha]_{\text{D}}^{25} = 7.2$  (*c* 0.36, THF)

(*S*)-1-methyl-1-phenyl-2,3,4,9-tetrahydro-1*H*-carbazole (**2h**)

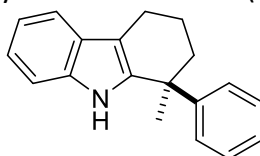

0.15 mmol, s.m. 39.2 mg, obtain 35.4 mg, 88% yield, white solid, e.r. 95:5.

$^1\text{H NMR}$  (501 MHz,  $\text{CDCl}_3$ )  $\delta$  7.54 (bs, 1H), 7.48 (d,  $J$  = 7.6 Hz, 1H), 7.20–7.18 (m, 3H), 7.14–7.09 (m, 1H), 7.08–7.04 (m, 4H), 2.79–2.62 (m, 2H), 2.02 (ddd,  $J$  = 13.1, 7.4, 2.8 Hz, 1H), 1.90 (ddd,  $J$  = 13.1, 10.2, 2.7 Hz, 1H), 1.79–1.73 (m, 1H), 1.68 (s, 3H), 1.63–1.57 (m, 1H).

$^{13}\text{C NMR}$  (126 MHz,  $\text{CDCl}_3$ )  $\delta$  148.5, 139.4, 135.9, 128.2, 127.5, 127.1, 126.2, 121.5, 119.3, 118.4, 111.3, 110.8, 41.9, 40.4, 27.6, 21.3, 20.0.

**HRMS** (ESI) ( $m/z$ ): calculated for  $\text{C}_{19}\text{H}_{19}\text{N}_1$   $[\text{M}]^+$ : 261.1514; found 261.1514.

The enantiomeric ratio was measured by HPLC analysis using following parameters: Daicel Chiralcel AD-3 column: *n*Hept:*i*PrOH = 97:3, flow rate 0.7 mL/ min,  $t_{\text{major}}$  = 8.7 min,  $t_{\text{minor}}$  = 9.7 min.

$[\alpha]_{\text{D}}^{25} = 1.4$  (*c* 0.14, THF)

(*R*)-1-butyl-1,5-dimethyl-2,3,4,9-tetrahydro-1*H*-carbazole (**2i**)

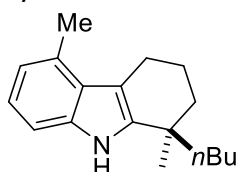

0.1 mmol, s.m. 22 mg, obtain 20.6 mg, 94% yield, colorless oil, e.r. 95:5.

$^1\text{H NMR}$  (501 MHz,  $\text{CDCl}_3$ )  $\delta$  7.66 (bs, 1H), 7.12 (d,  $J$  = 8.0 Hz, 1H), 6.97 (t,  $J$  = 7.6 Hz, 1H), 6.77 (d,  $J$  = 7.1 Hz, 1H), 3.06–2.89 (m, 2H), 2.66 (s, 3H), 1.96–1.75 (m,

3H), 1.69–1.49 (m, 3H), 1.36–1.09 (m, 7H), 0.90–0.86 (t,  $J = 7.4$  Hz, 3H).

**$^{13}\text{C}$  NMR** (126 MHz,  $\text{CDCl}_3$ )  $\delta$  140.9, 135.8, 130.6, 126.6, 121.1, 120.5, 110.1, 108.4, 42.0, 35.5, 34.6, 27.7, 26.9, 24.2, 23.6, 20.6, 20.1, 14.3.

**HRMS** (ESI) ( $m/z$ ): calculated for  $\text{C}_{18}\text{H}_{24}\text{N}_1$  [ $\text{M}-\text{H}$ ] $^-$ : 254.1914; found 254.1917.

The enantiomeric ratio was measured by HPLC analysis using following parameters: Daicel Chiralcel OJ-3 column:  $n\text{Hept}:\text{iPrOH} = 97:3$ , flow rate 0.7 mL/min,  $t_{\text{major}} = 10.0$  min,  $t_{\text{minor}} = 8.7$  min.

$[\alpha]_{\text{D}}^{25} = -19.0$  (c 0.2, THF)

(*R*)-1-butyl-1,6-dimethyl-2,3,4,9-tetrahydro-1*H*-carbazole (**2j**)

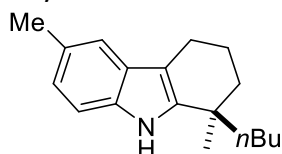

0.15 mmol, s.m. 38.5 mg, obtain 32.7 mg, 85% yield, colorless oil, e.r. 95:5.

**$^1\text{H}$  NMR** (501 MHz,  $\text{CDCl}_3$ )  $\delta$  7.49 (bs, 1H), 7.16 (d,  $J = 3.5$  Hz, 1H), 7.10 (d,  $J = 8.1$  Hz, 1H), 6.86 (d,  $J = 7.8$  Hz, 1H), 2.65–2.46 (m, 2H), 2.36 (s, 3H), 1.91–1.68 (m, 3H), 1.60–1.41 (m, 3H), 1.26–1.03 (m, 7H), 0.79 (t,  $J = 7.4$  Hz, 3H).

**$^{13}\text{C}$  NMR** (126 MHz,  $\text{CDCl}_3$ )  $\delta$  141.6, 134.1, 128.3, 128.0, 122.5, 118.0, 110.2, 109.2, 41.9, 36.1, 34.8, 27.7, 26.9, 23.6, 21.6, 21.5, 20.3, 14.3.

**HRMS** (ESI) ( $m/z$ ): calculated for  $\text{C}_{18}\text{H}_{25}\text{N}_1$  [ $\text{M}$ ] $^+$ : 255.1981; found 255.1982.

The enantiomeric ratio was measured by HPLC analysis using following parameters: Daicel Chiralcel OJ-3 column:  $n\text{Hept}:\text{iPrOH} = 97:3$ , flow rate 0.7 mL/min,  $t_{\text{major}} = 12.0$  min,  $t_{\text{minor}} = 14.9$  min.

$[\alpha]_{\text{D}}^{25} = -23.0$  (c 0.2, THF)

(*R*)-1-butyl-1,7-dimethyl-2,3,4,9-tetrahydro-1*H*-carbazole (**2k**)

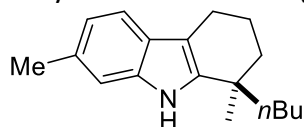

0.1 mmol, s.m. 23 mg, obtain 21 mg, 91% yield, colorless oil, e.r. 96:4.

**$^1\text{H}$  NMR** (501 MHz,  $\text{CDCl}_3$ )  $\delta$  7.56 (bs, 1H), 7.35 (d,  $J = 7.9$  Hz, 1H), 7.10 (s, 1H), 6.91 (d,  $J = 7.9$  Hz, 1H), 2.75–2.58 (m, 2H), 2.45 (s, 3H), 1.97–1.77 (m, 3H), 1.68–1.52 (m, 3H), 1.38–1.14 (m, 7H), 0.88 (t,  $J = 7.1$  Hz, 3H).

**$^{13}\text{C}$  NMR** (126 MHz,  $\text{CDCl}_3$ )  $\delta$  140.7, 136.2, 130.8, 125.6, 120.7, 117.9, 110.6, 109.5, 41.9, 36.2, 34.7, 27.6, 27.0, 23.6, 21.9, 21.5, 20.3, 14.3.

**HRMS** (EI) ( $m/z$ ): calculated for  $\text{C}_{18}\text{H}_{25}\text{N}_1$  [ $\text{M}$ ] $^+$ : 255.1981; found 255.1982.

The enantiomeric ratio was measured by HPLC analysis using following parameters: Daicel Chiralcel OJ-3 column:  $n\text{Hept}:\text{iPrOH} = 95:5$ , flow rate 0.7 mL/min,  $t_{\text{major}} = 11.4$  min,  $t_{\text{minor}} = 14.0$  min.

$[\alpha]_{\text{D}}^{25} = -30.9$  (c 0.22, THF)

(*R*)-1-butyl-1,8-dimethyl-2,3,4,9-tetrahydro-1*H*-carbazole (**2l**)

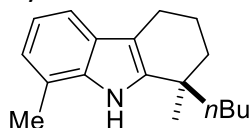

0.1 mmol, s.m. 25 mg, obtain 23.4 mg, 96% yield, colorless oil, e.r. 95:5.

**<sup>1</sup>H NMR** (501 MHz, CDCl<sub>3</sub>) δ 7.54 (bs, 1H), 7.33 (d, *J* = 7.7 Hz, 1H), 7.01 (t, *J* = 7.4 Hz, 1H), 6.94 (dt, *J* = 7.1, 1.0 Hz, 1H), 2.79–2.58 (m, 2H), 2.49 (s, 3H), 2.00–1.77 (m, 3H), 1.71–1.58 (m, 3H), 1.39–1.15 (m, 7H), 0.90 (t, *J* = 7.1 Hz, 3H).

**<sup>13</sup>C NMR** (126 MHz, CDCl<sub>3</sub>) δ 141.2, 135.2, 127.3, 121.9, 119.6, 119.4, 115.9, 110.2, 41.9, 36.1, 34.7, 27.6, 26.9, 23.6, 21.6, 20.3, 16.9, 14.2.

**HRMS** (ESI) (*m/z*): calculated for C<sub>18</sub>H<sub>25</sub>N<sub>1</sub> [M]<sup>+</sup>: 255.1981; found 255.1984.

The enantiomeric ratio was measured by HPLC analysis using following parameters: Daicel Chiralcel IB-3 column: *n*Hept:*i*PrOH = 95:5, flow rate 0.7 mL/ min, *t*<sub>major</sub> = 5.9 min, *t*<sub>minor</sub> = 6.9 min.

[α]<sub>D</sub><sup>25</sup> = – 36.1 (c 0.36, THF)

(*R*)-10-butyl-10-methyl-8,9,10,11-tetrahydro-7*H*-benzo[*a*]carbazole (**2m**)

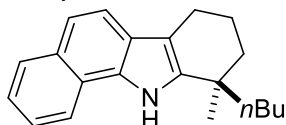

0.1 mmol, s.m. 29 mg, obtain 25.8 mg, 89% yield, colorless oil, e.r. 96:4.

**<sup>1</sup>H NMR** (501 MHz, CDCl<sub>3</sub>) δ 8.39 (bs, 1H), 8.01 (d, *J* = 8.2 Hz, 1H), 7.92 (d, *J* = 8.3 Hz, 1H), 7.61 (d, *J* = 8.5 Hz, 1H), 7.53–7.47 (m, 2H), 7.38 (t, *J* = 8.1 Hz, 1H), 2.88–2.69 (m, 2H), 2.05–1.84 (m, 3H), 1.77–1.62 (m, 3H), 1.45–1.20 (m, 7H), 0.91 (t, *J* = 7.1 Hz, 3H).

**<sup>13</sup>C NMR** (126 MHz, CDCl<sub>3</sub>) δ 139.8, 130.2, 129.9, 129.1, 125.2, 123.2, 121.7, 119.9, 119.3, 118.9, 111.5, 42.2, 36.2, 34.8, 27.9, 26.9, 23.6, 21.6, 20.4, 14.3.

**HRMS** (ESI) (*m/z*): calculated for C<sub>21</sub>H<sub>24</sub>N<sub>1</sub> [M-H]<sup>+</sup>: 290.1914; found 290.1917.

The enantiomeric ratio was measured by HPLC analysis using following parameters: Daicel Chiralcel IB-3 column: *n*Hept:*i*PrOH = 95:5, flow rate 0.7 mL/ min, *t*<sub>major</sub> = 10.7 min, *t*<sub>minor</sub> = 9.6 min.

[α]<sub>D</sub><sup>25</sup> = – 77.4 (c 0.23, THF)

(*R*)-9-butyl-9-methyl-1,2,3,6,7,8,9,10-octahydrocyclopenta[*a*]carbazole (**2n**)

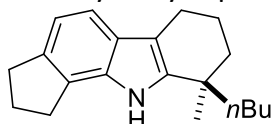

0.15 mmol, s.m. 42.5 mg, obtain 40 mg, 94% yield, colorless oil, e.r. 96:4.

**<sup>1</sup>H NMR** (501 MHz, CDCl<sub>3</sub>) δ 7.46 (bs, 1H), 7.28 (d, *J* = 7.9 Hz, 1H), 7.02 (d, *J* = 7.9 Hz, 1H), 3.04 (t, *J* = 7.4 Hz, 4H), 2.77–2.58 (m, 2H), 2.22 (q, *J* = 7.3 Hz, 2H), 1.99–1.79 (m, 3H), 1.71–1.57 (m, 3H), 1.39–1.17 (m, 7H), 0.90 (t, *J* = 7.1 Hz, 3H).

**<sup>13</sup>C NMR** (126 MHz, CDCl<sub>3</sub>) δ 140.6, 137.7, 132.8, 126.4, 124.9, 116.2, 116.0, 110.2, 41.9, 36.1, 34.7, 33.2, 30.1, 27.7, 26.9, 25.7, 23.6, 21.7, 20.3, 14.3.

**HRMS** (EI) (*m/z*): calculated for C<sub>20</sub>H<sub>27</sub>N<sub>1</sub> [M]<sup>+</sup>: 281.2138; found 281.2140.

The enantiomeric ratio was measured by HPLC analysis using following parameters: Daicel Chiralcel OJ-3 column: MeCN:H<sub>2</sub>O = 90:10, flow rate 1.0 mL/ min, *t*<sub>major</sub> = 10.6 min, *t*<sub>minor</sub> = 8.2 min.

[α]<sub>D</sub><sup>25</sup> = – 8.0 (c 0.1, THF)

(*R*)-7-bromo-1-butyl-1-methyl-2,3,4,9-tetrahydro-1*H*-carbazole (**2o**)

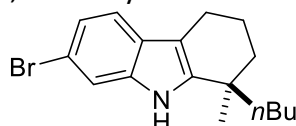

0.15 mmol, s.m. 48 mg, obtain 47 mg, 97% yield, colorless oil, e.r. 97:3.

**<sup>1</sup>H NMR** (501 MHz, CDCl<sub>3</sub>) δ 7.70 (bs, 1H), 7.44 (d, *J* = 1.7 Hz, 1H), 7.32 (d, *J* = 8.3 Hz, 1H), 7.18 (dt, *J* = 8.3, 1.8 Hz, 1H), 2.73–2.54 (m, 2H), 1.98–1.76 (m, 3H), 1.66–1.57 (m, 3H), 1.35–1.12 (m, 7H), 0.90 (t, *J* = 7.0 Hz, 3H).

**<sup>13</sup>C NMR** (126 MHz, CDCl<sub>3</sub>) δ 142.2, 136.6, 126.7, 122.3, 119.4, 114.4, 113.5, 109.9, 41.8, 35.9, 34.7, 27.5, 26.9, 23.6, 21.3, 20.1, 14.2.

**HRMS** (DE) (*m/z*): calculated for C<sub>17</sub>H<sub>22</sub>N<sub>1</sub>Br<sub>1</sub> [M]<sup>+</sup>: 319.0933; found 319.0936.

The enantiomeric ratio was measured by HPLC analysis using following parameters: Daicel Chiralcel AD-3 column: *n*Hept:*i*PrOH = 97:3, flow rate 0.7 mL/ min, *t*<sub>major</sub> = 10.6 min, *t*<sub>minor</sub> = 8.2 min.

[α]<sub>D</sub><sup>25</sup> = – 35.8 (*c* 0.57, THF)

(*R*)-1-butyl-7-chloro-1-methyl-2,3,4,9-tetrahydro-1*H*-carbazole (**2p**)

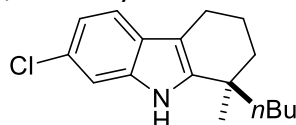

0.12 mmol, s.m. 31.7 mg, obtain 29 mg, 91% yield, colorless oil, e.r. 95:5.

**<sup>1</sup>H NMR** (501 MHz, CDCl<sub>3</sub>) δ 7.68 (bs, 1H), 7.34 (d, *J* = 8.4 Hz, 1H), 7.27 (d, *J* = 1.8 Hz, 1H), 7.03 (dd, *J* = 8.4, 1.9 Hz, 1H), 2.72–2.54 (m, 2H), 1.96–1.80 (m, 3H), 1.65–1.56 (m, 3H), 1.37–1.10 (m, 7H), 0.88 (t, *J* = 7.1 Hz, 3H).

**<sup>13</sup>C NMR** (126 MHz, CDCl<sub>3</sub>) δ 142.2, 136.1, 126.9, 126.4, 119.7, 119.0, 110.6, 109.8, 41.8, 35.9, 34.8, 27.5, 26.9, 23.6, 21.3, 20.1, 14.2.

**HRMS** (EI) (*m/z*): calculated for C<sub>17</sub>H<sub>21</sub>N<sub>1</sub>Cl [M]<sup>+</sup>: 275.1435; found 275.1438.

The enantiomeric ratio was measured by HPLC analysis using following parameters: Daicel Chiralcel AD-3 column: *n*Hept:*i*PrOH = 97:3, flow rate 0.7 mL/ min, *t*<sub>major</sub> = 9.1 min, *t*<sub>minor</sub> = 7.3 min.

[α]<sub>D</sub><sup>25</sup> = – 17.9 (*c* 0.48, THF)

(*R*)-1-butyl-7-fluoro-1-methyl-2,3,4,9-tetrahydro-1*H*-carbazole (**2q**)

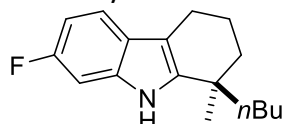

0.15 mmol, s.m. 40.3 mg, obtain 37.5 mg, 93% yield, colorless oil, e.r. 95:5.

**<sup>1</sup>H NMR** (501 MHz, CDCl<sub>3</sub>) δ 7.68 (bs, 1H), 7.35 (dd, *J* = 8.6, 5.4 Hz, 1H), 6.99 (dd, *J* = 9.8, 2.3 Hz, 1H), 6.84 (ddd, *J* = 9.8, 8.6, 2.3 Hz, 1H), 2.75–2.56 (m, 2H), 1.99–1.77 (m, 3H), 1.73–1.52 (m, 3H), 1.37–1.14 (m, 7H), 0.89 (t, *J* = 7.1 Hz, 3H).

**<sup>13</sup>C NMR** (126 MHz, CDCl<sub>3</sub>) δ 160.6, 141.8, 135.7, 124.4, 118.6, 109.6, 107.6, 107.4, 97.3, 97.1, 41.9, 36.0, 34.7, 27.5, 26.9, 23.6, 21.4, 20.2, 14.2.

**<sup>19</sup>F NMR** (471 MHz, CDCl<sub>3</sub>) δ -122.6 (td, *J* = 9.8, 8.9, 5.2 Hz).

**HRMS** (ESI) (*m/z*): calculated for C<sub>17</sub>H<sub>21</sub>N<sub>1</sub>F<sub>1</sub> [M-H]<sup>+</sup>: 258.1663; found 258.1665.

The enantiomeric ratio was measured by HPLC analysis using following parameters: Daicel Chiralcel AD-3 column: *n*Hept:*i*PrOH = 97:3, flow rate 0.7 mL/ min, *t*<sub>major</sub> = 7.6 min, *t*<sub>minor</sub> = 6.6 min.

[α]<sub>D</sub><sup>25</sup> = – 24.8 (*c* 0.46, THF)

(*R*)-1-butyl-7-methoxy-1-methyl-2,3,4,9-tetrahydro-1*H*-carbazole (**2r**)

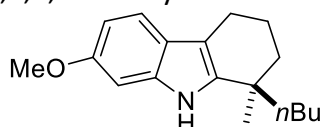

0.15 mmol, s.m. 40 mg, obtain 37 mg, 93% yield, colorless oil, e.r. 96:4.

**<sup>1</sup>H NMR** (501 MHz, CDCl<sub>3</sub>) δ 7.64 (bs, 1H), 7.34 (d, *J* = 8.5 Hz, 1H), 6.85 (d, *J* = 2.2 Hz, 1H), 6.76 (dd, *J* = 8.5, 2.3 Hz, 1H), 3.85 (s, 3H), 2.77–2.51 (m, 2H), 1.99–1.76 (m, 2H), 1.70–1.50 (m, 3H), 1.35–1.12 (m, 8H), 0.90 (t, *J* = 7.0 Hz, 3H).

**<sup>13</sup>C NMR** (126 MHz, CDCl<sub>3</sub>) δ 156.0, 140.3, 136.5, 122.3, 118.6, 109.4, 108.4, 95.1, 56.0, 41.9, 36.1, 34.7, 27.6, 26.9, 23.6, 21.5, 20.3, 14.2.

**HRMS** (ESI) (*m/z*): calculated for C<sub>18</sub>H<sub>26</sub>N<sub>1</sub>O<sub>1</sub> [*M*+*H*]<sup>+</sup>: 272.2009; found 272.2009.

The enantiomeric ratio was measured by HPLC analysis using following parameters: Daicel Chiralcel OD-3 column: *n*Hept : *i*PrOH = 97:3, flow rate 0.7 mL/ min, *t*<sub>major</sub> = 11.1 min, *t*<sub>minor</sub> = 6.4 min.

[α]<sub>D</sub><sup>25</sup> = – 41.3 (c 0.15, THF)

(*R*)-7-(benzyloxy)-1-butyl-1-methyl-2,3,4,9-tetrahydro-1*H*-carbazole (**2s**)

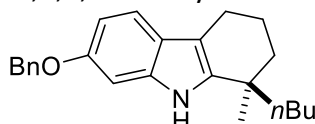

0.15 mmol, s.m. 53.6 mg, obtain 51.1 mg, 95% yield, colorless oil, e.r. 96:4.

**<sup>1</sup>H NMR** (501 MHz, CDCl<sub>3</sub>) δ 7.60 (bs, 1H), 7.50 (d, *J* = 7.8 Hz, 2H), 7.40 (t, *J* = 7.4 Hz, 2H), 7.36–7.30 (m, 1H), 7.20 (d, *J* = 8.7 Hz, 1H), 7.05 (d, *J* = 2.5 Hz, 1H), 6.88 (dd, *J* = 8.7, 2.4 Hz, 1H), 5.13 (s, 2H), 2.75–2.54 (m, 2H), 2.02–1.75 (m, 3H), 1.68–1.59 (m, 3H), 1.37–1.15 (m, 7H), 0.90 (t, *J* = 7.1 Hz, 3H).

**<sup>13</sup>C NMR** (126 MHz, CDCl<sub>3</sub>) δ 153.2, 142.6, 138.1, 131.1, 128.6, 128.1, 127.8, 127.7, 111.6, 111.1, 109.6, 102.4, 71.3, 41.9, 36.1, 34.8, 27.6, 26.9, 23.6, 21.5, 20.2, 14.2.

**HRMS** (EI) (*m/z*): calculated for C<sub>24</sub>H<sub>29</sub>N<sub>1</sub>O<sub>1</sub> [*M*]<sup>+</sup>: 347.2243; found 347.2249.

The enantiomeric ratio was measured by HPLC analysis using following parameters: Daicel Chiralcel IA-3 column: *n*Hept:*i*PrOH = 90:10, flow rate 0.7 mL/ min, *t*<sub>major</sub> = 12.4 min, *t*<sub>minor</sub> = 10.5 min.

[α]<sub>D</sub><sup>25</sup> = – 9.4 (c 0.15, THF)

(*R*)-1-methyl-1-(2-(4,4,5,5-tetramethyl-1,3,2-dioxaborolan-2-yl)ethyl)-2,3,4,9-tetrahydro-1*H*-carbazole (**2t**)

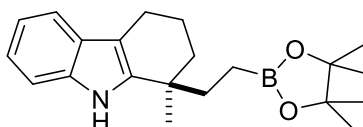

0.1 mmol, s.m. 34 mg, 3 mol % cat. 65 °C, 3d, obtain 23 mg, 67% yield, light yellow solid, e.r. 94:6.

**<sup>1</sup>H NMR** (501 MHz, C<sub>6</sub>D<sub>6</sub>) δ 7.58 (dd, *J* = 6.8, 1.8 Hz, 1H), 7.25 (td, *J* = 6.7, 1.6 Hz, 2H), 7.11 (d, *J* = 6.8 Hz, 1H), 7.04 (bs, 1H), 2.68–2.47 (m, 2H), 1.93–1.58 (m, 5H), 1.44–1.34 (m, 1H), 1.09–1.02 (m, 12H), 0.97–0.86 (m, 1H), 0.80–0.74 (ddd, *J* = 16.1, 11.2, 5.6 Hz, 1H).

**<sup>13</sup>C NMR** (126 MHz, C<sub>6</sub>D<sub>6</sub>) δ 140.9, 136.5, 128.5, 121.3, 119.4, 118.6, 111.0, 110.1, 83.0, 35.9, 35.6, 35.5, 27.0, 25.06, 25.0, 21.7, 20.5.

**<sup>11</sup>B NMR** (161 MHz, C<sub>6</sub>D<sub>6</sub>) δ 34.3.

**HRMS** (DE) (*m/z*): calculated for C<sub>21</sub>H<sub>30</sub>N<sub>1</sub>O<sub>2</sub>B<sub>1</sub> [*M*]<sup>+</sup>: 339.2370; found 339.2371.

The enantiomeric ratio was measured by HPLC analysis using following parameters: Daicel Chiralcel IB-3 column: *n*Hept:*i*PrOH = 95:5, flow rate 0.7 mL/ min,  $t_{\text{major}} = 4.1$  min,  $t_{\text{minor}} = 4.9$  min.

$[\alpha]_{\text{D}}^{25} = -7.8$  (c 0.36, THF)

(*S*)-1-(2-azidoethyl)-1-methyl-2,3,4,9-tetrahydro-1*H*-carbazole (**2u**)

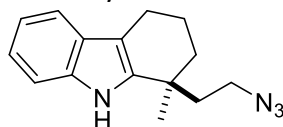

0.15 mmol, s.m. 38 mg, 4 mol % cat. 3d, obtain 30 mg, 79% yield, light yellow oil, e.r. 93:7.

$^1\text{H NMR}$  (501 MHz,  $\text{C}_6\text{D}_6$ )  $\delta$  7.56 (dd,  $J = 7.6, 1.2$  Hz, 1H), 7.30–7.20 (m, 2H), 7.14 (d,  $J = 7.6$  Hz, 1H), 6.78 (bs, 1H), 2.70 (ddd,  $J = 12.3, 9.1, 6.9$  Hz, 1H), 2.63–2.41 (m, 3H), 1.61–1.53 (m, 2H), 1.45 (ddd,  $J = 9.0, 6.6, 2.2$  Hz, 2H), 1.41–1.31 (m, 1H), 1.26–1.17 (m, 1H), 0.89 (s, 3H).

$^{13}\text{C NMR}$  (126 MHz,  $\text{C}_6\text{D}_6$ )  $\delta$  138.8, 136.5, 121.8, 119.7, 118.7, 111.0, 110.4, 47.9, 40.0, 36.3, 33.7, 27.5, 21.5, 20.4.

**HRMS** (ESI) ( $m/z$ ): calculated for  $\text{C}_{15}\text{H}_{17}\text{N}_4$  [ $\text{M}-\text{H}$ ] $^-$ : 253.1459; found 253.1460.

The enantiomeric ratio was measured by HPLC analysis using following parameters: Daicel Chiralcel IB-3 column: *n*Hept:*i*PrOH = 95:5, flow rate 0.7 mL/ min,  $t_{\text{major}} = 8.1$  min,  $t_{\text{minor}} = 10.5$  min.

$[\alpha]_{\text{D}}^{25} = -17.0$  (c 0.4, THF)

(*S*)-1-(2-iodoethyl)-1-methyl-2,3,4,9-tetrahydro-1*H*-carbazole (**2v**)

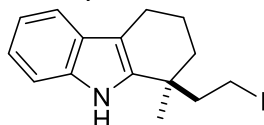

0.1 mmol, s.m. 34 mg, obtain 31.5 mg, 93% yield, colorless oil, e.r. 97:3.

$^1\text{H NMR}$  (501 MHz,  $\text{C}_6\text{D}_6$ )  $\delta$  7.55 (d,  $J = 7.5$  Hz, 1H), 7.28–7.22 (m, 2H), 7.13–7.10 (d,  $J = 7.5$  Hz, 1H), 6.62 (bs, 1H), 2.70 (ddd,  $J = 12.8, 9.3, 5.0$  Hz, 1H), 2.61–2.48 (m, 2H), 2.43 (ddd,  $J = 15.5, 7.4, 6.0$  Hz, 1H), 1.94 (dtd,  $J = 39.6, 13.5, 4.9$  Hz, 2H), 1.58–1.47 (m, 2H), 1.30 (ddd,  $J = 13.1, 8.1, 4.8$  Hz, 1H), 1.12 (ddd,  $J = 13.3, 6.6, 4.1$  Hz, 1H), 0.79 (s, 3H).

$^{13}\text{C NMR}$  (126 MHz,  $\text{C}_6\text{D}_6$ )  $\delta$  138.4, 136.5, 121.8, 119.7, 118.7, 111.1, 110.6, 46.9, 37.2, 35.4, 26.9, 21.4, 20.3, 1.4.

**HRMS** (ESI) ( $m/z$ ): calculated for  $\text{C}_{15}\text{H}_{19}\text{I}_1\text{N}_1$  [ $\text{M}+\text{H}$ ] $^+$ : 340.0557; found 340.0556.

The enantiomeric ratio was measured by HPLC analysis using following parameters: Daicel Chiralcel IB-3 column: *n*Hept:*i*PrOH = 95:5, flow rate 0.7 mL/ min,  $t_{\text{major}} = 7.5$  min,  $t_{\text{minor}} = 11.4$  min.

$[\alpha]_{\text{D}}^{25} = 1.9$  (c 0.22, THF)

### 3. Synthetic applications

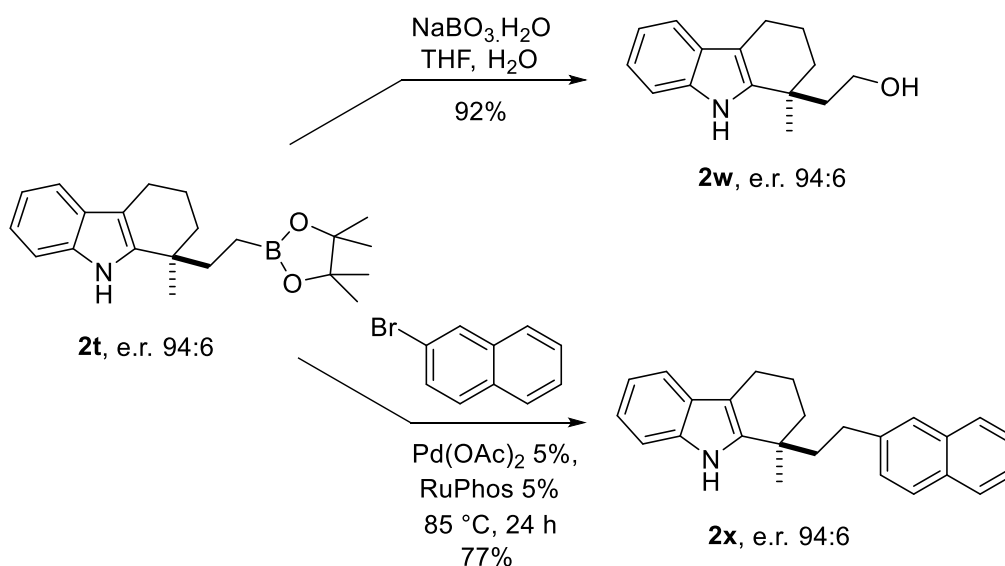

Scheme S1. Synthetic application

#### (S)-2-(1-methyl-2,3,4,9-tetrahydro-1H-carbazol-1-yl)ethan-1-ol (**2w**)

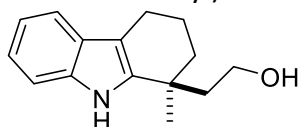

(*R*)-1-methyl-1-(2-(4,4,5,5-tetramethyl-1,3,2-dioxaborolan-2-yl)ethyl)-2,3,4,9-tetrahydro-1H-carbazole **2t** (211 mg, 0.62 mmol, 1 equiv.) was dissolved in 15 mL THF, NaBO<sub>3</sub>·H<sub>2</sub>O (310 mg, 3.1 mmol, 5 equiv.) and H<sub>2</sub>O 15 mL were added. The resulting mixture was allowed to stir in an open flask at r.t. for 2 h. Then saturated NH<sub>4</sub>Cl was added and extracted with EtOAc for 3 times. The combined organic layers were collected and dried over Na<sub>2</sub>SO<sub>4</sub>, and concentrated under reduced pressure. The residue was purified by silica column chromatography (hexane : EtOAc = 1 : 1) to afford 131 mg product in 92% yield as oil.

<sup>1</sup>H NMR (501 MHz, C<sub>6</sub>D<sub>6</sub>) δ 8.20 (bs, 1H), 7.60 (d, *J* = 7.4 Hz, 1H), 7.32–7.19 (m, 3H), 3.36–3.32 (m, 1H), 3.19–3.16 (m, 1H), 2.80–2.53 (m, 2H), 1.79–1.66 (m, 2H), 1.63–1.53 (m, 2H), 1.49–1.31 (m, 2H), 1.11 (s, 3H).

<sup>13</sup>C NMR (126 MHz, C<sub>6</sub>D<sub>6</sub>) δ 140.3, 136.5, 121.5, 119.4, 118.7, 111.0, 109.6, 59.8, 43.8, 38.7, 34.1, 27.3, 24.9, 21.7, 20.6.

HRMS (ESI) (*m/z*): calculated for C<sub>15</sub>H<sub>20</sub>N<sub>1</sub>O<sub>1</sub> [M+H]<sup>+</sup>: 230.1540; found 230.1540.

The enantiomeric ratio was measured by HPLC analysis using following parameters: Daicel Chiralcel IB-3 column: *n*Hept:*i*PrOH = 90:10, flow rate 0.7 mL/min, *t*<sub>major</sub> = 11.0 min, *t*<sub>minor</sub> = 7.0 min.

[α]<sub>D</sub><sup>25</sup> = −13.5 (c 0.43, THF)

#### (S)-1-methyl-1-(2-(naphthalen-2-yl)ethyl)-2,3,4,9-tetrahydro-1H-carbazole (**2x**)

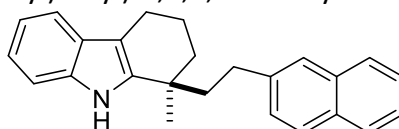

In a flame-dried Schlenk flask under Ar and equipped with a magnetic stir bar, (*R*)-1-methyl-1-(2-(4,4,5,5-tetramethyl-1,3,2-dioxaborolan-2-yl)ethyl)-2,3,4,9-tetrahydro-1H-carbazole **2t** (34

mg, 0.1 mmol, 1 equiv.), 2-bromonaphthalene (23 mg, 0.11 mmol, 1.1 equiv.), cesium carbonate (130 mg, 0.4 mmol, 4 equiv.), Pd(OAc)<sub>2</sub> (1.2 mg, 0.005 mmol, 0.05 equiv.) and Ruphos (4.7 mg, 0.01 mmol, 0.1 equiv.) were dissolved in 1,4-dioxane (1 mL). After degassing with argon for 10 min, distilled water (0.1 mL) was sequentially added. Then the reaction mixture was heated at 85 °C. 15 h later, the mixture was cooled to r.t., it was quenched with saturated NH<sub>4</sub>Cl and extracted with DCM for 3 times. The combined organic layers were collected and dried over Na<sub>2</sub>SO<sub>4</sub>, and concentrated under reduced pressure. The residue was purified by silica column chromatography (hexane:EtOAc = 10:1) to afford desired product 26 mg in 77 % yield.

**<sup>1</sup>H NMR** (501 MHz, C<sub>6</sub>D<sub>6</sub>) δ 7.69 (d, *J* = 8.3 Hz, 2H), 7.64 (t, *J* = 8.6 Hz, 2H), 7.43 (d, *J* = 1.7 Hz, 1H), 7.35–7.23 (m, 4H), 7.19 (dd, *J* = 7.6, 0.9 Hz, 1H), 7.12 (dd, *J* = 8.4, 1.8 Hz, 1H), 6.90 (bs, 1H), 2.78–2.49 (m, 3H), 2.40 (ddd, *J* = 13.4, 10.7, 6.0 Hz, 1H), 1.85–1.68 (m, 5H), 1.54–1.42 (m, 1H), 1.10 (s, 3H).

**<sup>13</sup>C NMR** (126 MHz, C<sub>6</sub>D<sub>6</sub>) δ 140.6, 140.2, 136.56, 134.4, 132.67, 126.7, 126.3, 125.5, 121.6, 119.6, 118.7, 110.9, 110.3, 44.1, 36.1, 35.0, 31.6, 27.5, 21.7, 20.7.

**HRMS** (ESI) (*m/z*): calculated for C<sub>25</sub>H<sub>26</sub>N<sub>1</sub> [M+H]<sup>+</sup>: 340.2060; found 340.2060.

The enantiomeric ratio was measured by HPLC analysis using following parameters: Daicel Chiralcel OD-3 column: *n*Hept:*i*PrOH = 95:5, flow rate 0.5 mL/ min, *t*<sub>major</sub> = 23.5 min, *t*<sub>minor</sub> = 27.4 min.

[α]<sub>D</sub><sup>25</sup> = 3.2 (c 0.25, THF)

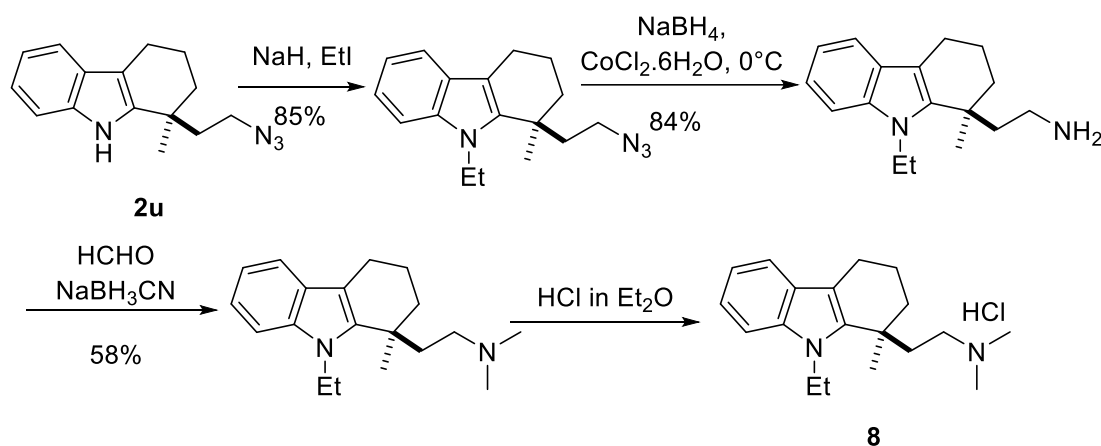

Scheme S2. Synthesis of enantio-enriched potential anti-depressant

(*S*)-1-(2-azidoethyl)-9-ethyl-1-methyl-2,3,4,9-tetrahydro-1*H*-carbazole

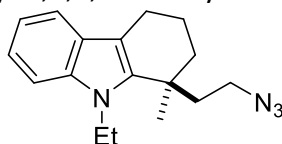

A dried round flask equipped with a magnetic stirrer bar was charged with (*S*)-1-(2-azidoethyl)-1-methyl-2,3,4,9-tetrahydro-1*H*-carbazole **2u** (60 mg, 0.236 mmol, 1 equiv.) and DMF (4 mL) under Ar atmosphere. The reaction mixture was cooled down to 0 °C and NaH (60% in mineral oil, 14 mg, 0.283 mmol, 1.2 equiv.) was added and stirred for 10 min. Then ethyl iodide (40 μL, 0.283 mmol, 1.2 equiv.) was added and stirring was continued for 1h. Then isopropanol was drop wisely added at 0 °C till there is no more bubble. The reaction was quenched with ice-cold water and extracted with EtOAc 3 times. The combined organic layers were collected and

dried over Na<sub>2</sub>SO<sub>4</sub>, and concentrated under reduced pressure. The residue was purified by silica column chromatography (hexane:EtOAc = 10:1) to afford desired product 56 mg in 85% yield.

**<sup>1</sup>H NMR** (501 MHz, CDCl<sub>3</sub>) δ 7.49 (d, *J* = 7.7 Hz, 1H), 7.28 (d, *J* = 7.8 Hz, 1H), 7.19 (td, *J* = 6.9, 1.2 Hz, 1H), 7.10 (td, *J* = 7.0, 1.0 Hz, 1H), 4.39–4.19 (m, 2H), 3.32 (ddd, *J* = 12.3, 10.8, 5.8 Hz, 1H), 3.10 (ddd, *J* = 12.3, 10.7, 5.2 Hz, 1H), 2.80–2.72 (m, 1H), 2.66 (ddd, *J* = 15.3, 8.2, 5.4 Hz, 1H), 2.24 (ddd, *J* = 14.0, 10.8, 5.2 Hz, 1H), 2.04–1.76 (m, 4H), 1.73–1.61 (m, 1H), 1.47 (s, 3H), 1.43 (t, *J* = 7.2 Hz, 3H).

**<sup>13</sup>C NMR** (126 MHz, CDCl<sub>3</sub>) δ 138.9, 136.6, 127.3, 121.4, 119.0, 118.4, 111.0, 109.3, 48.1, 39.8, 39.7, 39.3, 35.2, 27.7, 22.1, 20.3, 15.1.

**HRMS** (ESI) (*m/z*): calculated for C<sub>17</sub>H<sub>23</sub>N<sub>3</sub> [M+H]<sup>+</sup>: 283.1917; found 283.1920.

The enantiomeric ratio was measured by HPLC analysis using following parameters: Daicel Chiralcel IC-3 column: *n*Hept:*i*PrOH = 99:1, flow rate 0.7 mL/min, *t*<sub>major</sub> = 4.8 min, *t*<sub>minor</sub> = 4.4 min.

(*S*)-2-(9-ethyl-1-methyl-2,3,4,9-tetrahydro-1*H*-carbazol-1-yl)-*N,N*-dimethylethan-1-amine

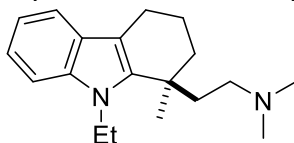

To a mixture of (*S*)-1-(2-azidoethyl)-9-ethyl-1-methyl-2,3,4,9-tetrahydro-1*H*-carbazole (35 mg, 0.124 mmol, 1 equiv.) and CoCl<sub>2</sub>·6H<sub>2</sub>O (3 mg, 0.0124 mmol, 0.1 equiv.) in MeOH (4 mL) at 0 °C, NaBH<sub>4</sub> (9.4 mg, 0.248 mmol, 2 equiv.) was added. The resulting black mixture was stirred under Ar at 0 °C for 1 h and the reaction was monitored by TLC. After completion of the reaction, it was quenched with ice-cold water and extracted with DCM 3 times. The combined organic layers were collected and dried over Na<sub>2</sub>SO<sub>4</sub>, and concentrated under reduced pressure. The residue was purified by silica column chromatography (DCM:MeOH = 5:1) to afford (*S*)-2-(9-ethyl-1-methyl-2,3,4,9-tetrahydro-1*H*-carbazol-1-yl)ethan-1-amine 26 mg in 84% yield.

A solution of (*S*)-2-(9-ethyl-1-methyl-2,3,4,9-tetrahydro-1*H*-carbazol-1-yl)ethan-1-amine (28 mg, 0.109 mmol, 1 equiv.) in MeOH (3 mL) was treated with formaldehyde (300 μL, 4 mmol, 37% solution in water) and sodium cyanoborohydride (13 mg, 2.218 mmol, 2 equiv.). The reaction was stirred for 3 h and then extracted with water and DCM. The combined organic layers were collected and dried over Na<sub>2</sub>SO<sub>4</sub>, and concentrated under reduced pressure. The residue was purified by silica column chromatography (DCM:MeOH = 10:1) to afford desired product 18 mg in 58% yield.

**<sup>1</sup>H NMR** (501 MHz, CDCl<sub>3</sub>) δ 7.47 (d, *J* = 7.7 Hz, 1H), 7.28 (d, *J* = 8.2 Hz, 1H), 7.18 (t, *J* = 7.4 Hz, 1H), 7.08 (t, *J* = 7.4 Hz, 1H), 4.37–4.27 (m, 2H), 2.75 (dt, *J* = 15.4, 4.9 Hz, 1H), 2.69–2.58 (m, 2H), 2.50 (s, 6H), 2.43–2.35 (m, 2H), 2.04 (td, *J* = 13.3, 4.2 Hz, 1H), 1.92–1.77 (m, 3H), 1.74–1.64 (m, 1H), 1.48 (s, 3H), 1.40 (t, *J* = 7.1 Hz, 3H).

**<sup>13</sup>C NMR** (126 MHz, CDCl<sub>3</sub>) δ 138.7, 136.5, 127.3, 121.4, 119.0, 118.4, 111.1, 109.5, 55.3, 44.4, 39.9, 39.4, 36.9, 35.1, 27.7, 22.1, 20.3, 15.1.

**HRMS** (EI) (*m/z*): calculated for C<sub>19</sub>H<sub>23</sub>N<sub>2</sub> [M]<sup>+</sup>: 284.2247; found 284.2247.

(*S*)-2-(9-ethyl-1-methyl-2,3,4,9-tetrahydro-1*H*-carbazol-1-yl)-*N,N*-dimethylethan-1-amine hydrochloride (**8**)

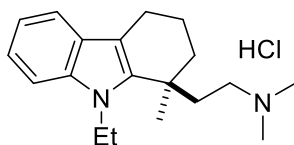

A solution of (*S*)-2-(9-ethyl-1-methyl-2,3,4,9-tetrahydro-1*H*-carbazol-1-yl)-*N,N*-dimethylethan-1-amine (18 mg, 0.063 mmol, 1 equiv.) was added HCl solution (33  $\mu$ L, 0.066 mmol, 1.05 equiv. 2.0 M in Et<sub>2</sub>O) and stirred for 30 min. The volatiles were removed under reduced pressure to afford desired product **8** in quantitative yield.

**<sup>1</sup>H NMR** (501 MHz, CDCl<sub>3</sub>)  $\delta$  7.40 (d, *J* = 7.8 Hz, 1H), 7.22 (d, *J* = 7.8 Hz, 1H), 7.12 (t, *J* = 7.5 Hz, 1H), 7.02 (t, *J* = 7.4 Hz, 1H), 4.35–4.22 (m, 2H), 2.84 (t, *J* = 7.4 Hz, 1H), 2.74–2.38 (m, 10H), 2.15 (t, *J* = 11.6 Hz, 1H), 1.84–1.60 (m, 4H), 1.45 (s, 3H), 1.32 (t, *J* = 6.8 Hz, 3H).

**<sup>13</sup>C NMR** (126 MHz, CDCl<sub>3</sub>)  $\delta$  137.5, 136.6, 127.2, 121.7, 119.2, 118.4, 111.6, 109.8, 55.1, 43.4, 43.2, 40.1, 39.5, 35.3, 35.0, 27.8, 22.0, 20.3, 15.1.

**HRMS** (EI) (*m/z*): calculated for C<sub>19</sub>H<sub>23</sub>N<sub>2</sub> [M-Cl]<sup>+</sup>: 285.2324; found 285.2325.

The enantiomeric ratio was measured by HPLC analysis using following parameters: Daicel Chiralcel OJ-3R column: Methanol : (NH<sub>4</sub>)HCO<sub>3</sub> = 85:15, pH 9.0, flow rate 1.0 mL/ min, *t*<sub>major</sub> = 4.9 min, *t*<sub>minor</sub> = 6.1 min.

[ $\alpha$ ]<sub>D</sub><sup>25</sup> = – 6.2 (c 0.13, MeOH)

## 4. Synthesis of catalysts

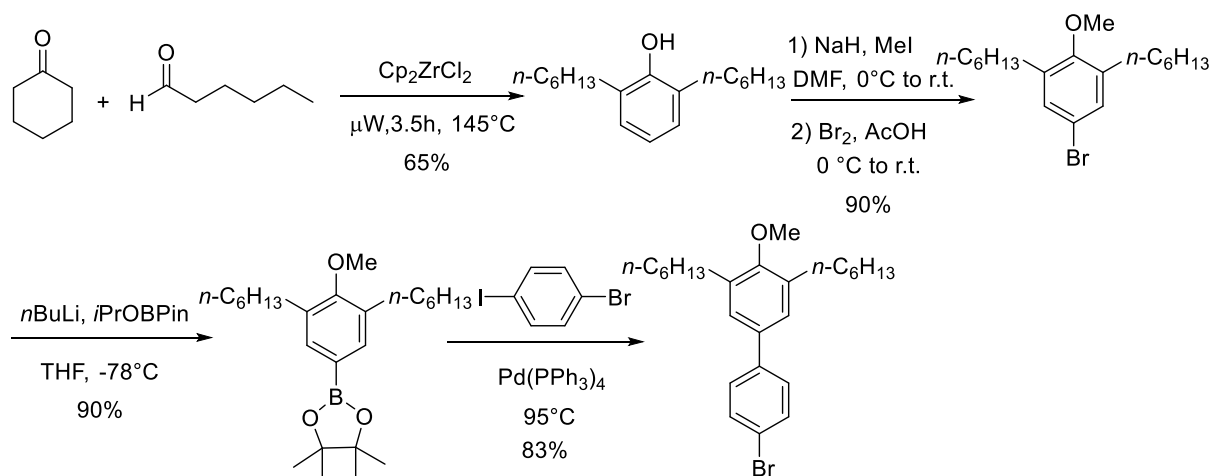

**Scheme S3:** Synthesis of wing

### 2,6-dihexylphenol

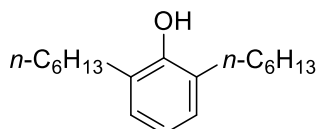

2,6-dihexylphenol was prepared following to the reported procedure,<sup>3</sup> the analytic data was identical to the reported value.

**<sup>1</sup>H NMR** (501 MHz, CDCl<sub>3</sub>)  $\delta$  6.98 (d, *J* = 7.5 Hz, 2H), 6.81 (t, *J* = 7.5 Hz, 1H), 4.64 (s, 1H), 2.65 – 2.49 (m, 4H), 1.69–1.50 (m, 4H), 1.45–1.23 (m, 12H), 0.95–0.84 (m, 6H).

**<sup>13</sup>C NMR** (126 MHz, CDCl<sub>3</sub>)  $\delta$  151.5, 128.1, 127.7, 120.4, 31.9, 30.3, 29.9, 29.5, 22.8, 14.3.

**HRMS** (ESI) ( $m/z$ ): calculated for  $C_{18}H_{29}O_1$   $[M]^+$ : 261.2224; found 261.2227.

5-bromo-1,3-dihexyl-2-methoxybenzene

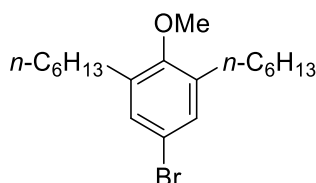

To the solution of 2,6-dihexylphenol (11.5g, 43.8 mmol, 1.0 equiv.) in DMF (50 mL) was added NaH (60% dispersion in mineral oil, 2.1 g, 52.6 mmol, 1.2 equiv.) at room temperature. After 10 min, to the suspension was added methyl iodide (3.55 mL, 52.6 mmol, 1.2 equiv.) at room temperature and the mixture was stirred for 3 h. Then it was quenched with saturated  $NH_4Cl$  and extracted twice with MTBE. The combined organic layer was washed with brine, and then dried over  $Na_2SO_4$ , concentrated under reduced pressure and the crude product was used in the next step without further purification.

To the solution of the above-mentioned mixture in  $CH_3COOH$  (120 mL) was added  $Br_2$  (2.34 mL, 1.05 equiv.) dropwise at 0 °C. The reaction was warmed up to r.t. and stirred for 30 min. The reaction was followed by GC-MS till all starting material was consumed. Then it was quenched with 2 M NaOH and extracted twice with  $Et_2O$ . The combined organic layers were washed with brine and then dried over  $Na_2SO_4$ , and concentrated under reduced pressure. The residue was purified by silica column chromatography (pure hexane) to afford 13.9 g product as a colorless oil in 90% yield.

**$^1H$  NMR** (501 MHz,  $CDCl_3$ )  $\delta$  7.07 (s, 2H), 3.63 (s, 3H), 2.54–2.45 (m, 4H), 1.55–1.48 (m, 4H), 1.31–1.18 (m, 12H), 0.84–0.77 (m, 6H).

**$^{13}C$  NMR** (126 MHz,  $CDCl_3$ )  $\delta$  155.7, 138.2, 130.4, 116.9, 61.3, 31.8, 30.7, 29.8, 29.5, 22.7, 14.2.

**HRMS** (CI) ( $m/z$ ): calculated for  $C_{19}H_{31}O_1Br_1$   $[M]^+$ : 354.1553; found 354.1559.

2-(3,5-dihexyl-4-methoxyphenyl)-4,4,5,5-tetramethyl-1,3,2-dioxaborolane

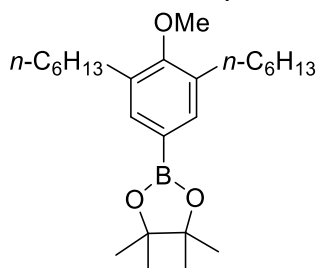

To a solution of 5-bromo-1,3-dihexyl-2-methoxybenzene (10.5 g, 29.5 mmol, 1 equiv.) in THF (60 mL) was slowly added  $nBuLi$  (2.5 M, 14.2 mL, 35.5 mmol, 1.2 equiv.) at  $-78^\circ C$ . After stirring at that temperature for 10 min, 2-isopropoxy-4,4,5,5-tetramethyl-1,3,2-dioxaborolane (9 mL, 44.3 mmol, 1.5 equiv.) was added to the mixture then slowly warmed up to room temperature for 1 h. The reaction was quenched with cold saturated  $NH_4Cl$  and extracted by  $EtOAc$  for 3 times. The combined organic layers were collected and dried over  $Na_2SO_4$ , and concentrated under reduced pressure. The residue was purified by silica column chromatography (hexane :  $EtOAc$  = 50:1) to afford desired product 11.25 g as colorless oil in 90% yield.

**$^1H$  NMR** (501 MHz,  $CDCl_3$ )  $\delta$  7.50 (s, 2H), 3.73 (s, 3H), 2.67–2.55 (m, 4H), 1.66–1.57 (m, 4H), 1.41–1.27 (m, 18H), 0.93–0.80 (m, 9H).

**$^{13}C$  NMR** (126 MHz,  $CDCl_3$ )  $\delta$  159.5, 135.4, 134.8, 83.8, 83.0, 61.3, 31.9, 31.2, 30.2, 29.8, 25.0,

25.0, 22.8, 14.3.

**HRMS** (ESI) (*m/z*): calculated for C<sub>25</sub>H<sub>43</sub>B<sub>1</sub>O<sub>3</sub> [M+Na]<sup>+</sup>: 425.3197; found 425.3203.

4'-bromo-3,5-dihexyl-4-methoxy-1,1'-biphenyl

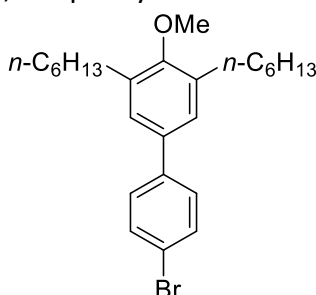

In a flame-dried Schlenk flask under Ar and equipped with a magnetic stir bar, 2-(3,5-dihexyl-4-methoxyphenyl)-4,4,5,5-tetramethyl-1,3,2-dioxaborolane (907 mg, 2.25 mmol, 1 equiv.), 1-bromo-3-iodobenzene (700 mg, 2.47 mmol, 1.1 equiv.), potassium carbonate (1.2 g, 9 mmol, 4 equiv.) and tetrakis(triphenylphosphine)palladium (130 mg, 0.11 mmol, 0.05 equiv.) were dissolved in 1,4-dioxane (15 mL). After degassing with argon for 10 min, distilled water (3 mL) was sequentially added. Then the reaction mixture was heated at 100 °C. 15 h later, the mixture was cooled to r.t., it was quenched with saturated NH<sub>4</sub>Cl and extracted with EtOAc for 3 times. The combined organic layers were collected and dried over Na<sub>2</sub>SO<sub>4</sub>, and concentrated under reduced pressure. The residue was purified by silica column chromatography (hexane : EtOAc = 50:1) to afford desired product 803 mg as oil in 83% yield.

**<sup>1</sup>H NMR** (501 MHz, CDCl<sub>3</sub>) δ 7.53 (d, *J* = 8.5 Hz, 2H), 7.42 (d, *J* = 8.5 Hz, 2H), 7.20 (s, 2H), 3.76 (s, 3H), 2.73–2.62 (m, 4H), 1.70–1.59 (m, 4H), 1.46–1.15 (m, 12H), 0.94–0.81 (m, 6H).

**<sup>13</sup>C NMR** (126 MHz, CDCl<sub>3</sub>) δ 156.5, 140.3, 136.4, 135.7, 131.8, 128.7, 126.4, 121.1, 61.4, 31.9, 31.1, 30.2, 29.7, 22.8, 14.3.

**HRMS** (APPI) (*m/z*): calculated for C<sub>25</sub>H<sub>35</sub>Br<sub>1</sub>O<sub>1</sub> [M]<sup>+</sup>: 430.1867; found 430.1867.

(*S*)-3,3'-diphenyl-[1,1'-binaphthalene]-2,2'-diol and (*S*)-3,3'-di([1,1'-biphenyl]-4-yl)-[1,1'-binaphthalene]-2,2'-diol were prepared in a related procedure of 3,3'-substituted BINOL. The analytic data was identical to the reported value.<sup>4</sup>

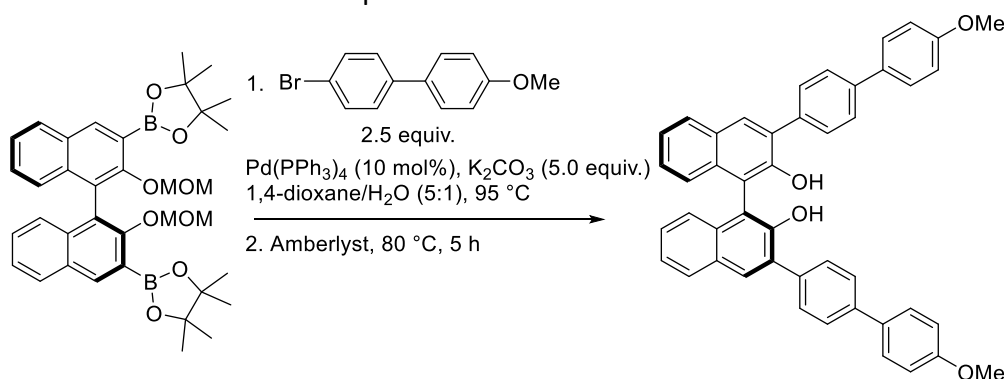

**Scheme S4:** Synthesis of BINOL

(S)-3,3'-bis(4'-methoxy-[1,1'-biphenyl]-4-yl)-[1,1'-binaphthalene]-2,2'-diol

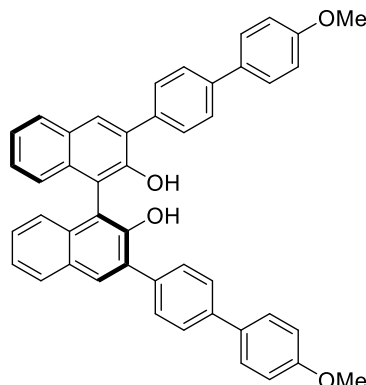

In a flame-dried Schlenk flask under Ar and equipped with a magnetic stir bar, (S)-2,2'-(2,2'-bis(methoxymethoxy)-1, 1'-binaphthyl-3, 3'-diyl)bis(4,4,5,5-tetramethyl-1,3,2-dioxaborolane) (665 mg, 1.06 mmol, 1 equiv.), 4-bromo-4'-methoxy-1,1'-biphenyl (582 mg, 2.55 mmol, 2.4 equiv.), potassium carbonate (880 mg, 24.24 mmol, 6 equiv.) and tetrakis(triphenylphosphine)palladium (122.7 mg, 0.1 mmol, 0.1 equiv.) were dissolved in 1,4-dioxane (10 mL). After degassing with argon for 10 min, distilled water (2 mL) was sequentially added. Then the reaction mixture was heated at 95 °C. 15 h later, the mixture was cooled to r.t., it was quenched with saturated NH<sub>4</sub>Cl and extracted with EtOAc for 3 times. The combined organic layers were collected and dried over Na<sub>2</sub>SO<sub>4</sub>, and concentrated under reduced pressure.

The suspension of the above-mentioned crude product and Amberlyst 15 (hydrogen form) in a mixture solvent of THF (15 mL) /MeOH (15 mL) was heated at 80 °C for 5 h. The cooled mixture was then filtered and purified by column chromatography (hexane/EtOAc = 5:1) afforded diol 552 mg (80 % yield) as a light yellow foam.

**<sup>1</sup>H NMR** (501 MHz, CDCl<sub>3</sub>) δ 7.97 (s, 2H), 7.83 (d, *J* = 8.3, 2H), 7.70 (d, *J* = 8.3, 4H), 7.57 (d, *J* = 7.3, 4H), 7.50 (m, *J* = 7.1, 4H), 7.29 (ddd, *J* = 8.1, 6.7, 1.3 Hz, 2H), 7.22 (ddd, *J* = 8.2, 6.8, 1.3 Hz, 2H), 7.15 (d, *J* = 8.6, 2H), 6.92–6.86 (m, 4H), 5.34 (s, 2H), 3.73 (s, 6H).

**<sup>13</sup>C NMR** (126 MHz, CDCl<sub>3</sub>) δ 159.4, 150.4, 140.3, 135.9, 133.4, 133.1, 131.4, 130.5, 130.1, 129.7, 128.6, 128.3, 127.5, 126.9, 124.5, 124.4, 114.4, 112.5, 55.5.

**HRMS** (ESI) (*m/z*): calculated for C<sub>46</sub>H<sub>33</sub>O<sub>4</sub> [M-H]<sup>+</sup>: 649.2389; found 649.2384.

[α]<sub>D</sub><sup>25</sup> = 84.8 (c 0.5, CH<sub>2</sub>Cl<sub>2</sub>)

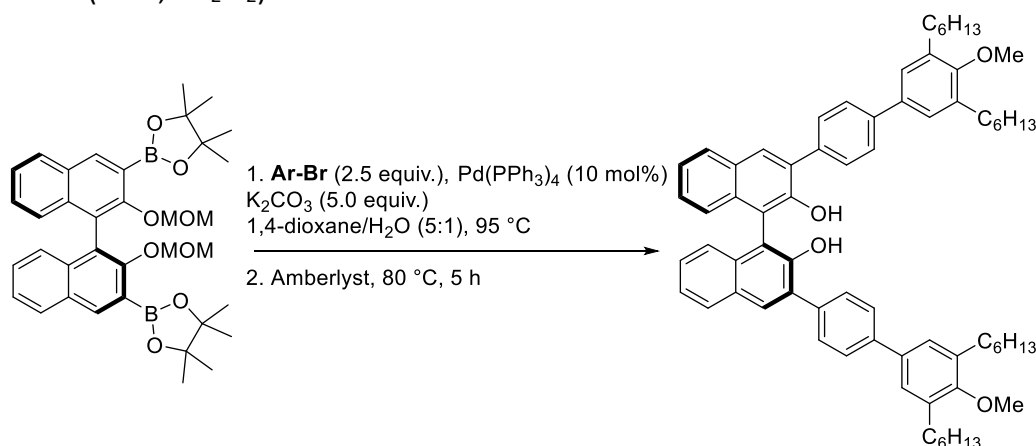

**Scheme S5:** Synthesis of BINOL

(S)-3,3'-bis(3',5'-dihexyl-4'-methoxy-[1,1'-biphenyl]-4-yl)-[1,1'-binaphthalene]-2,2'-diol

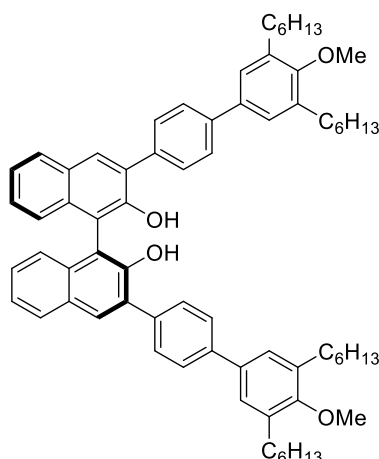

In a flame-dried Schlenk flask under Ar and equipped with a magnetic stir bar, (*S*)-2,2'-(2,2'-bis(methoxymethoxy)-1, 1'-binaphthyl-3, 3'-diyl)bis(4,4-5,5-tetramethyl-1,3,2-dioxaborolane) (238 mg, 0.38 mmol, 1 equiv.), 4'-bromo-3,5-dihexyl-4-methoxy-1,1'-biphenyl (410 mg, 0.95 mmol, 2.5 equiv.), potassium carbonate (210 mg, 1.52 mmol, 4 equiv.) and tetrakis(triphenylphosphine)palladium (44 mg, 0.04 mmol, 0.1 equiv.) were dissolved in 1,4-dioxane (6 mL). After degassing with argon for 10 min, distilled water (1 mL) was sequentially added. Then the reaction mixture was heated at 95 °C. 15 h later, the mixture was cooled to r.t., it was quenched with saturated NH<sub>4</sub>Cl and extracted with EtOAc for 3 times. The combined organic layers were collected and dried over Na<sub>2</sub>SO<sub>4</sub>, and concentrated under reduced pressure.

The suspension of the above-mentioned crude product and Amberlyst 15 (hydrogen form) in a mixture solvent of THF (6 mL) /MeOH (6 mL) was heated at 80 °C for 5 h. The cooled mixture was then filtered and purified by column chromatography (hexane/EtOAc = 20:1) afforded diol 280 mg (75 % yield) as a white form.

**<sup>1</sup>H NMR** (501 MHz, CDCl<sub>3</sub>) δ 8.10 (s, 2H), 7.96 (d, *J* = 7.7, 2H), 7.87 – 7.78 (m, 4H), 7.76 – 7.65 (m, 4H), 7.42 (ddd, *J* = 8.1, 6.8, 1.3 Hz, 2H), 7.38–7.34 (m, 6H), 7.28 (d, *J* = 7.7, 2H), 5.44 (s, 2H), 3.81 (s, 6H), 2.77–2.66 (m, 8H), 1.77–1.63 (m, 8H), 1.48–1.30 (m, 24H), 0.96–0.87 (m, 12H).

**<sup>13</sup>C NMR** (126 MHz, CDCl<sub>3</sub>) δ 156.4, 150.4, 140.9, 136.5, 136.3, 136.1, 133.1, 131.5, 130.5, 130.0, 129.7, 128.6, 127.5, 127.2, 126.6, 124.5, 124.5, 112.5, 61.5, 31.9, 31.1, 30.3, 29.7, 22.8, 14.3.

**HRMS** (ESI) (*m/z*): calculated for C<sub>70</sub>H<sub>81</sub>O<sub>4</sub> [M-H]<sup>+</sup>: 985.6140; found 985.6142.

[α]<sub>D</sub><sup>25</sup> = 50.7 (c 0.3, CH<sub>2</sub>Cl<sub>2</sub>)

#### General procedure of IDPi synthesis:

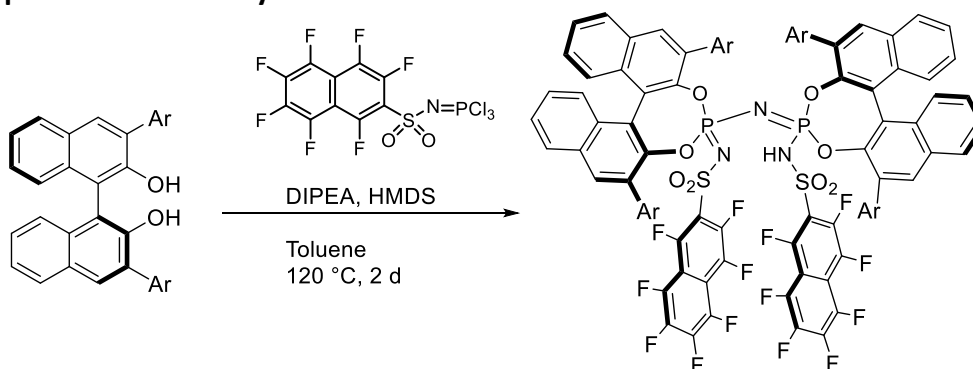

**Scheme S6:** General procedure of IDPi synthesis

((Perfluoronaphthalen-2-yl)sulfonyl)phosphorimidoyl trichloride was prepared following a reported procedure.<sup>5</sup>

In a flame dried pre-weighed Schlenk flask under Ar equipped with a magnetic stir bar, ((perfluoronaphthalen-2-yl)sulfonyl)phosphorimidoyl trichloride (2.04 equiv.) was added and weighed directly inside the Schlenk flask. 3, 3'-disubstituted BINOL (2.04 equiv.) was then added and the solids were evacuated and purged with Ar for 3 times. Then the solids were dissolved in toluene (2 mL) and *N,N*-diisopropylethylamine (16 equiv.) was added to form a heterogeneous mixture. The mixture was stirred at r.t. for 10 min and TLC showed diol was full consumed. Then hexamethyldisilazane (1 equiv.) was added and the mixture was heated to 120 °C for 2 d. The reaction mixture was cooled down to r.t., diluted with CH<sub>2</sub>Cl<sub>2</sub> and quenching with 3 M HCl. Organic layer was separated and aqueous layer was washed with CH<sub>2</sub>Cl<sub>2</sub>. The combined organic layers were collected and dried over Na<sub>2</sub>SO<sub>4</sub>, and concentrated under reduced pressure. The residue was purified by silica column chromatography (pentane:Et<sub>2</sub>O = 20:1 to 1:1). The purified product was dissolved in CH<sub>2</sub>Cl<sub>2</sub> and acidified with 3M HCl solution. The organic layer was separated, and the aqueous layer was extracted with CH<sub>2</sub>Cl<sub>2</sub>. The combined organic layers were collected and concentrated to afford colorless solid under high *vacuum*. (52 % to 65 % yield).

#### Imidodiphosphorimidate (IDPi **7b**)

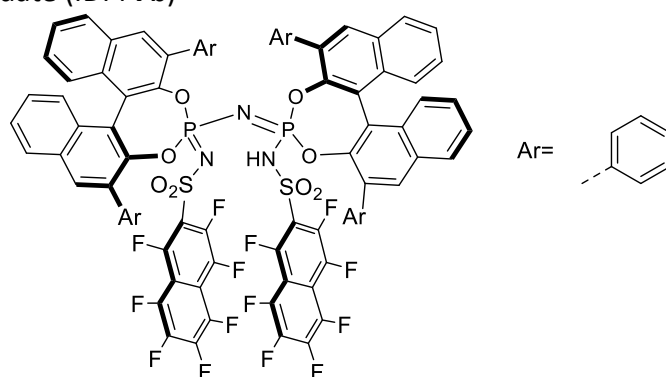

**<sup>1</sup>H NMR** (501 MHz, CDCl<sub>3</sub>) δ 8.09 (d, *J* = 8.2 Hz, 2H), 7.98 (s, 2H), 7.82 (d, *J* = 8.2 Hz, 2H), 7.69 (t, *J* = 7.5 Hz, 2H), 7.64 (s, 2H), 7.49–7.37 (m, 8H), 7.33 (t, *J* = 7.7 Hz, 6H), 7.22 (t, *J* = 7.5 Hz, 2H), 7.18–7.14 (m, 4H), 6.95 (t, *J* = 6.8 Hz, 2H), 6.74 – 6.63 (m, 8H).

**<sup>13</sup>C NMR** (126 MHz, CDCl<sub>3</sub>) δ 142.4, 142.4, 142.3, 134.5, 134.3, 133.2, 132.5, 131.2, 130.9, 130.4, 130.2, 129.9, 129.7, 128.7, 128.6, 127.7, 127.7, 127.0, 127.0, 126.5, 126.4, 126.1, 125.8, 125.7, 125.4, 125.3, 125.2, 124.6, 122.1, 121.5.

**<sup>31</sup>P NMR** (203 MHz, CDCl<sub>3</sub>) δ -10.1.

**<sup>19</sup>F NMR** (471 MHz, CDCl<sub>3</sub>) δ -111.4 (dd, *J* = 76.6, 18.9 Hz), -133.0 (d, *J* = 18.1 Hz), -140.7 (d, *J* = 76.7 Hz), -144.5 (dt, *J* = 58.8, 17.5 Hz), -146.4 (d, *J* = 58.5 Hz), -149.4, -154.2.

**HRMS** (ESI) (*m/z*): calculated for C<sub>84</sub>H<sub>40</sub>N<sub>3</sub>O<sub>8</sub>S<sub>2</sub>P<sub>2</sub>F<sub>14</sub> [*M*-H]<sup>-</sup>: 1610.1514; found 1610.1510.

[α]<sub>D</sub><sup>25</sup> = 82.7 (c 0.15, CH<sub>2</sub>Cl<sub>2</sub>)

Imidodiphosphorimidate (IDPi **7c**)

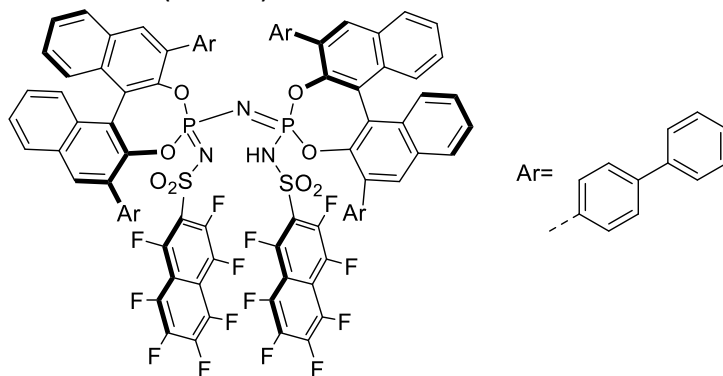

**<sup>1</sup>H NMR** (501 MHz, CD<sub>2</sub>Cl<sub>2</sub>) δ 8.23 (d, *J* = 8.2 Hz, 2H), 8.04 (s, 2H), 7.93 (d, *J* = 6.2 Hz, 4H), 7.74 (ddd, *J* = 8.1, 6.7, 1.1 Hz, 2H), 7.48 (ddd, *J* = 8.2, 6.8, 1.2 Hz, 4H), 7.39 (dd, *J* = 11.1, 5.6 Hz, 14H), 7.31 (d, *J* = 8.4 Hz, 2H), 7.28–7.18 (m, 6H), 7.18–7.06 (m, 12H), 6.93 (d, *J* = 8.0 Hz, 4H), 6.88 (d, *J* = 8.1 Hz, 4H).

**<sup>13</sup>C NMR** (126 MHz, CD<sub>2</sub>Cl<sub>2</sub>) δ 140.9, 140.7, 140.4, 140.3, 135.1, 134.5, 134.2, 133.7, 132.8, 132.3, 131.9, 131.6, 131.4, 131.0, 130.3, 129.4, 128.8, 128.7, 128.6, 127.7, 127.4, 127.4, 127.2, 127.17, 127.0, 126.9, 126.8, 126.8, 126.6, 123.5, 122.8.

**<sup>19</sup>F NMR** (471 MHz, CD<sub>2</sub>Cl<sub>2</sub>) δ -112.7 (d, *J* = 95.0 Hz), -133.4 (d, *J* = 26.9 Hz), -140.4 – -143.4 (m), -144.8 – -146.4 (m), -146.4 – -148.1 (m), -150.1 (bs, 2F), -154.8 (bs, 2F).

[α]<sub>D</sub><sup>25</sup> = 180.5 (c 0.5, CHCl<sub>3</sub>)

**HRMS** (ESI) (*m/z*): calculated for C<sub>108</sub>H<sub>56</sub>N<sub>3</sub>O<sub>8</sub>S<sub>2</sub>P<sub>2</sub>F<sub>14</sub> [M-H]<sup>-</sup>: 1914.2767; found 1914.2766.

Imidodiphosphorimidate (IDPi **7d**)

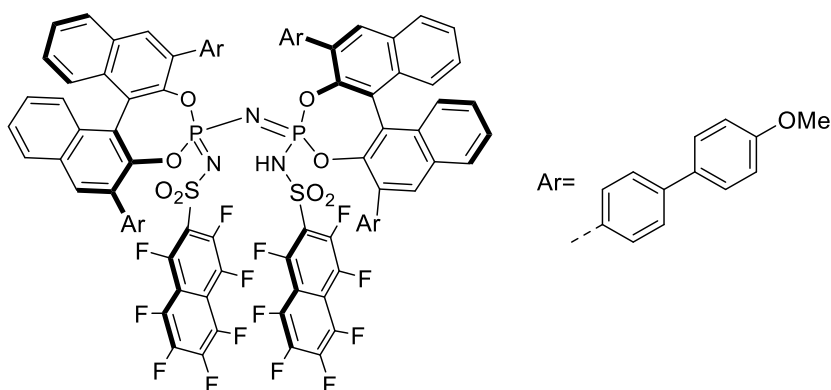

**<sup>1</sup>H NMR** (501 MHz, CDCl<sub>3</sub>) δ 8.16 (d, *J* = 8.2 Hz, 2H), 7.98 (s, 2H), 7.86 (d, *J* = 9.3 Hz, 4H), 7.69 (t, *J* = 7.5 Hz, 2H), 7.48–7.29 (m, 18H), 7.25 (d, *J* = 8.5 Hz, 2H), 7.17 (t, *J* = 7.7 Hz, 2H), 7.06 (d, *J* = 8.3 Hz, 4H), 6.83 (s, 8H), 6.74 (d, *J* = 8.3 Hz, 4H), 6.63 (d, *J* = 8.2 Hz, 4H), 3.74 (s, 6H), 3.70 (s, 6H).

**<sup>13</sup>C NMR** (126 MHz, CDCl<sub>3</sub>) δ 159.0, 158.9, 139.9, 139.8, 134.2, 134.1, 134.0, 133.6, 133.4, 133.0, 132.4, 132.0, 131.6, 131.3, 131.3, 131.0, 130.7, 130.17, 129.9, 128.9, 128.3, 128.1, 127.8, 127.2, 127.0, 126.9, 126.7, 126.3, 125.9, 125.7, 123.3, 122.4, 114.0, 113.8, 55.3, 55.3.

**<sup>31</sup>P NMR** (203 MHz, CDCl<sub>3</sub>) δ -10.7.

**<sup>19</sup>F NMR** (471 MHz, CDCl<sub>3</sub>) δ 112.3 (dd, *J* = 75.8, 18.9 Hz), -132.2 (d, *J* = 20.1 Hz), -141.0 (d, *J* = 77.6 Hz), -144.9 (dt, *J* = 58.2, 17.1 Hz), -146.6 (d, *J* = 57.6 Hz), -149.7 (bs), -154.5 (bs).

[α]<sub>D</sub><sup>25</sup> = 216.0 (c 0.15, CH<sub>2</sub>Cl<sub>2</sub>)

**HRMS** (ESI) (*m/z*): calculated for C<sub>112</sub>H<sub>64</sub>N<sub>3</sub>O<sub>12</sub>S<sub>2</sub>P<sub>2</sub>F<sub>14</sub> [M-H]<sup>-</sup>: 2034.3188; found 2034.3212.

## Imidodiphosphorimidate (IDPi **7e**)

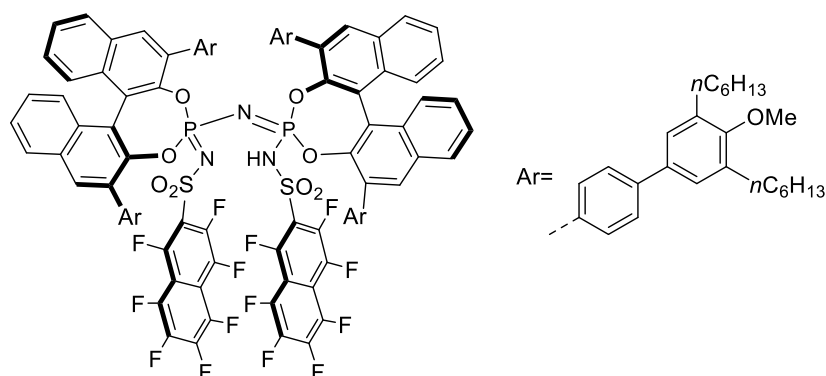

**<sup>1</sup>H NMR** (501 MHz, CDCl<sub>3</sub>)  $\delta$  8.19 (d,  $J$  = 8.2 Hz, 2H), 7.98 (s, 2H), 7.91 (s, 2H), 7.86 (d,  $J$  = 8.4 Hz, 2H), 7.69 (t,  $J$  = 7.5 Hz, 2H), 7.46–7.39 (m, 8H), 7.35–7.28 (m, 8H), 7.19 (t,  $J$  = 7.7 Hz, 2H), 7.09 (s, 4H), 6.86–6.77 (m, 8H), 6.73 (s, 4H), 3.67 (s, 6H), 3.56 (s, 6H), 2.57–2.43 (m, 8H), 2.38–2.34 (m, 4H), 2.21–2.16 (m, 4H), 1.51–1.45 (m, 8H), 1.36–1.02 (m, 56H), 0.83 (t,  $J$  = 7.2 Hz, 12H), 0.77 (t,  $J$  = 6.8 Hz, 12H).

**<sup>13</sup>C NMR** (126 MHz, CDCl<sub>3</sub>)  $\delta$  155.8, 144.1, 143.8, 140.4, 136.3, 136.2, 135.8, 135.7, 134.5, 134.2, 133.8, 133.4, 132.5, 131.9, 131.6, 131.3, 130.9, 130.4, 129.8, 129.0, 128.1, 127.1, 127.0, 126.8, 126.7, 126.4, 126.3, 126.3, 123.4, 122.5, 61.3, 61.3, 31.8, 31.7, 31.1, 30.9, 30.0, 29.9, 29.8, 29.7, 22.8, 14.2, 14.1.

**<sup>31</sup>P NMR** (203 MHz, CDCl<sub>3</sub>)  $\delta$  -9.4.

**<sup>19</sup>F NMR** (471 MHz, CDCl<sub>3</sub>)  $\delta$  -112.2 (d,  $J$  = 78.6 Hz), -132.5 (d,  $J$  = 18.2 Hz), -139.7 – -141.4 (m), -143.9 – -145.6 (m), -146.3 (dd,  $J$  = 49.3, 29.6 Hz), -149.6 (d,  $J$  = 19.3 Hz), -154.2.

$[\alpha]_D^{25}$  = 203.3 ( $c$  0.66, CH<sub>2</sub>Cl<sub>2</sub>)

**HRMS** (ESI) ( $m/z$ ): calculated for C<sub>160</sub>H<sub>160</sub>N<sub>3</sub>O<sub>12</sub>S<sub>2</sub>P<sub>2</sub>F<sub>14</sub> [M-H]<sup>-</sup>: 2707.0701; found 2707.0634.

## 5. Preparation of substrates

### Route A

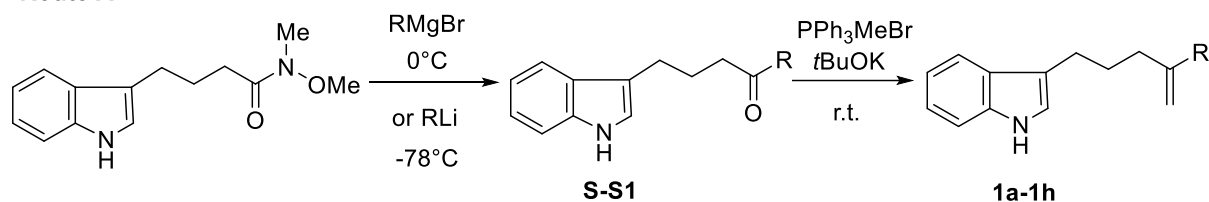

Scheme S7: Substrates synthesis of **1a-1h**

**General synthetic procedure of S-S1:** To a solution of 4-(1H-indol-3-yl)-N-methoxy-N-methylbutanamide in THF, which was prepared according to the literature,<sup>6</sup> freshly prepared Grignard reagent or lithium reagent (2.3 equiv.) was slowly added at 0 °C (-78 °C for lithium reagent). After stirring at that temperature for 1.5 h, the solution was slowly warmed up to room temperature and then quenched with cold saturated NH<sub>4</sub>Cl. Then the mixture was extracted with Et<sub>2</sub>O for 3 times. The combined organic layers were collected and dried over Na<sub>2</sub>SO<sub>4</sub>, and concentrated under reduced pressure. The residue was purified by silica column chromatography (hexane:EtOAc = 10:1) to afford product in 85 % to 93 % yield.

1-(1*H*-indol-3-yl)heptan-4-one

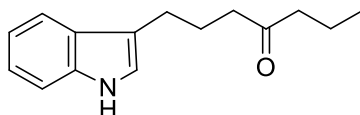

**<sup>1</sup>H NMR** (501 MHz, C<sub>6</sub>D<sub>6</sub>) δ 7.69 (d, *J* = 7.5 Hz, 1H), 7.27 – 7.17 (m, 2H), 7.12 (d, *J* = 8.2 Hz, 1H), 7.00 (bs, 1H), 6.50 (dd, *J* = 2.3, 1.1 Hz, 1H), 2.70 (t, *J* = 7.3 Hz, 2H), 2.05 (t, *J* = 7.5 Hz, 2H), 2.03–1.94 (m, 2H), 1.86 (t, *J* = 7.2 Hz, 2H), 1.50–1.44 (m, 2H), 0.75 (t, *J* = 7.4 Hz, 3H).

**<sup>13</sup>C NMR** (126 MHz, C<sub>6</sub>D<sub>6</sub>) δ 209.3, 136.9, 122.2, 121.5, 119.6, 119.3, 115.9, 111.5, 44.5, 42.1, 24.9, 24.7, 17.4, 13.9.

**HRMS** (EI) (*m/z*): calculated for C<sub>15</sub>H<sub>19</sub>N<sub>1</sub>O<sub>1</sub> [*M*]<sup>+</sup>: 229.1461; found 229.1462.

1-(1*H*-indol-3-yl)octan-4-one

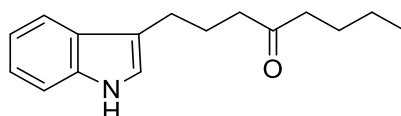

**<sup>1</sup>H NMR** (501 MHz, C<sub>6</sub>D<sub>6</sub>) δ 7.69 (d, *J* = 7.7 Hz, 1H), 7.27–7.17 (m, 2H), 7.10 (dd, *J* = 8.0, 0.9 Hz, 1H), 6.87 (bs, 1H), 6.49 (d, *J* = 2.3 Hz, 1H), 2.71 (t, *J* = 8.1 Hz, 2H), 2.08 (t, *J* = 8.1 Hz, 2H), 1.99 (p, *J* = 7.2 Hz, 2H), 1.92 (t, *J* = 7.4 Hz, 2H), 1.48–1.42 (m, 2H), 1.20–1.06 (m, 2H), 0.79 (t, *J* = 7.4 Hz, 3H).

**<sup>13</sup>C NMR** (126 MHz, C<sub>6</sub>D<sub>6</sub>) δ 209.2, 136.9, 122.2, 121.5, 119.6, 119.4, 116.0, 111.4, 42.4, 42.1, 26.2, 24.9, 24.7, 22.7, 14.1.

**HRMS** (ESI) (*m/z*): calculated for C<sub>16</sub>H<sub>20</sub>N<sub>1</sub>O<sub>1</sub> [*M*-H]<sup>-</sup>: 242.1550; found 242.1555.

1-(1*H*-indol-3-yl)nonan-4-one

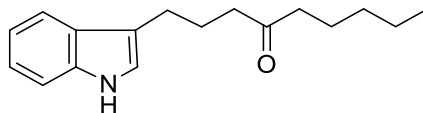

**<sup>1</sup>H NMR** (501 MHz, C<sub>6</sub>D<sub>6</sub>) δ 7.68 (d, *J* = 7.7 Hz, 1H), 7.26 – 7.17 (m, 2H), 7.16 – 7.10 (m, 2H), 6.52 (d, *J* = 2.2 Hz, 1H), 2.70 (t, *J* = 7.4 Hz, 2H), 2.08 (t, *J* = 7.5 Hz, 2H), 1.99 (p, *J* = 8.0 Hz, 2H), 1.92 (t, *J* = 7.4 Hz, 2H), 1.47 (p, *J* = 8.0 Hz, 2H), 1.26–1.14 (m, 2H), 1.14–1.05 (m, 2H), 0.83 (t, *J* = 7.3 Hz, 3H).

**<sup>13</sup>C NMR** (126 MHz, C<sub>6</sub>D<sub>6</sub>) δ 209.6, 137.0, 122.2, 121.6, 119.6, 119.3, 115.9, 111.5, 42.7, 42.1, 31.8, 24.9, 24.7, 23.8, 22.9, 14.2.

**HRMS** (ESI) (*m/z*): calculated for C<sub>17</sub>H<sub>24</sub>N<sub>1</sub>O<sub>1</sub> [*M*]<sup>+</sup>: 258.1852; found 258.1856.

1-(1*H*-indol-3-yl)-7-methyloctan-4-one

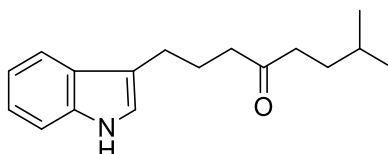

**<sup>1</sup>H NMR** (501 MHz, C<sub>6</sub>D<sub>6</sub>) δ 7.69 (d, *J* = 8.1, 1H), 7.26 – 7.17 (m, 2H), 7.13 (d, *J* = 8.1 Hz, 1H), 7.03 (bs, 1H), 6.52 (d, *J* = 2.2 Hz, 1H), 2.72 (t, *J* = 7.3 Hz, 2H), 2.10 (t, *J* = 7.5 Hz, 2H), 2.06–1.88 (m, 4H), 1.45 – 1.29 (m, 3H), 0.77 (d, *J* = 6.4 Hz, 6H).

**<sup>13</sup>C NMR** (126 MHz, C<sub>6</sub>D<sub>6</sub>) δ 209.5, 136.9, 122.2, 121.6, 119.6, 119.3, 115.9, 111.5, 42.1, 40.8, 32.9, 27.9, 24.9, 24.7, 22.5.

**HRMS** (ESI) (*m/z*): calculated for C<sub>17</sub>H<sub>23</sub>N<sub>1</sub>O<sub>1</sub> [*M*]<sup>+</sup>: 257.1774; found 257.1775.

6-(1*H*-indol-3-yl)-1-phenylhexan-3-one

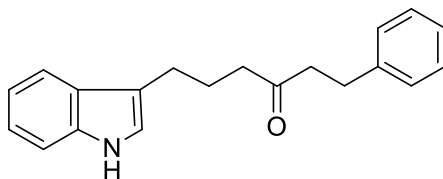

**<sup>1</sup>H NMR** (501 MHz, C<sub>6</sub>D<sub>6</sub>) δ 7.66 (d, *J* = 7.6 Hz, 1H), 7.26–7.17 (m, 2H), 7.15–7.09 (m, 3H), 7.05 (t, *J* = 7.4 Hz, 1H), 7.02–6.99 (m, 2H), 6.94 (bs, 1H), 6.46 (d, *J* = 2.2 Hz, 1H), 2.77 (t, *J* = 7.6 Hz, 2H), 2.66 (t, *J* = 7.1 Hz, 2H), 2.18 (t, *J* = 7.6 Hz, 2H), 2.02–1.88 (m, 4H).

**<sup>13</sup>C NMR** (126 MHz, C<sub>6</sub>D<sub>6</sub>) δ 208.5, 141.8, 136.9, 128.7, 128.7, 126.3, 122.2, 121.6, 119.6, 119.3, 115.9, 111.4, 44.1, 42.2, 30.0, 24.8, 24.6.

**HRMS** (ESI) (*m/z*): calculated for C<sub>20</sub>H<sub>21</sub>N<sub>1</sub>O<sub>1</sub> [*M*]<sup>+</sup>: 291.1618; found 291.1618.

4-(1*H*-indol-3-yl)-1-phenylbutan-1-one

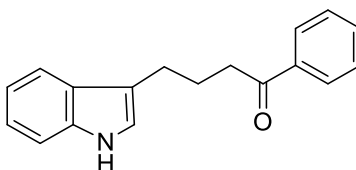

**<sup>1</sup>H NMR** (501 MHz, CDCl<sub>3</sub>) δ 8.11 (bs, 1H), 7.99–7.92 (m, 2H), 7.68 (dd, *J* = 7.9, 1.1 Hz, 1H), 7.59–7.53 (m, 1H), 7.46 (t, *J* = 8.4 Hz, 2H), 7.37 (dt, *J* = 8.1, 0.9 Hz, 1H), 7.23 (ddd, *J* = 8.0, 6.9, 1.2 Hz, 1H), 7.16 (ddd, *J* = 8.0, 7.0, 1.1 Hz, 1H), 6.98 (dd, *J* = 2.3, 1.1 Hz, 1H), 3.07 (t, *J* = 7.3 Hz, 2H), 2.92 (t, *J* = 7.4 Hz, 2H), 2.23 (p, *J* = 7.3 Hz, 2H).

**<sup>13</sup>C NMR** (126 MHz, CDCl<sub>3</sub>) δ 200.8, 137.1, 136.5, 133.0, 128.6, 128.1, 127.6, 122.0, 121.6, 119.2, 119.0, 115.8, 111.2, 38.2, 24.7, 24.7.

**HRMS** (EI) (*m/z*): calculated for C<sub>18</sub>H<sub>17</sub>N<sub>1</sub>O<sub>1</sub> [*M*]<sup>+</sup>: 263.1305; found 263.1304.

**General synthetic procedure of 1a-1h** : To a solution of 1M *t*BuOK in THF (3.0 equiv.) was added methyltriphenylphosphonium bromide (1.5 equiv.) at 0 °C and then the suspension was stirred at room temperature for 30 min. To the mixture was slowly added the solution of **S-S1** (1 equiv.) in THF at room temperature and then stirred for 15 h. Then the reaction mixture was quenched with saturated NH<sub>4</sub>Cl and extracted with DCM for 3 times. The combined organic layers were collected and dried over Na<sub>2</sub>SO<sub>4</sub>, and concentrated under reduced pressure. The residue was purified by silica column chromatography (hexane:EtOAc = 10:1 to 5:1) to afford product in 85 % to 95 % yield.

3-(4-methyleneoctyl)-1*H*-indole (**1a**)

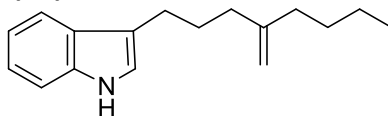

**<sup>1</sup>H NMR** (501 MHz, CDCl<sub>3</sub>) δ 7.90 (bs, 1H), 7.62 (d, *J* = 7.9 Hz, 1H), 7.36 (d, *J* = 8.2 Hz, 1H), 7.19 (td, *J* = 7.0, 1.2 Hz, 1H), 7.12 (td, *J* = 7.0, 1.0 Hz, 1H), 6.99 (dd, *J* = 2.3, 1.1 Hz, 1H), 4.75 (s, 2H), 2.77 (t, *J* = 7.5 Hz, 2H), 2.13 (t, *J* = 7.7 Hz, 2H), 2.04 (t, *J* = 7.6 Hz, 2H), 1.92–1.77 (m, 2H), 1.46–1.37 (m, 2H), 1.37–1.25 (m, 2H), 0.91 (t, *J* = 7.3 Hz, 3H).

**<sup>13</sup>C NMR** (126 MHz, CDCl<sub>3</sub>) δ 150.2, 136.5, 127.8, 122.0, 121.2, 119.2, 119.1, 117.0, 111.2, 108.8, 36.1, 36.0, 30.2, 28.4, 25.0, 22.7, 14.2.

**HRMS** (ESI) (*m/z*): calculated for C<sub>17</sub>H<sub>23</sub>N<sub>1</sub> [*M-H*]<sup>-</sup>: 240.1758; found 240.1760.

3-(4-methylenenonyl)-1*H*-indole (**1b**)

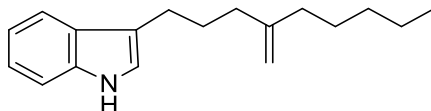

**<sup>1</sup>H NMR** (501 MHz, CDCl<sub>3</sub>) δ 7.89 (bs, 1H), 7.63 (d, *J* = 7.8 Hz, 1H), 7.36 (d, *J* = 8.1 Hz, 1H), 7.20 (t, *J* = 7.7 Hz, 1H), 7.12 (t, *J* = 8.1 Hz, 1H), 6.99 (d, *J* = 2.2 Hz, 1H), 4.75 (s, 2H), 2.78 (t, *J* = 7.6 Hz, 2H), 2.14 (t, *J* = 7.7 Hz, 2H), 2.04 (t, *J* = 7.7 Hz, 2H), 1.90–1.84 (m, 2H), 1.50–1.38 (m, 2H), 1.37–1.22 (m, 4H), 0.90 (t, *J* = 7.9 Hz, 3H).

**<sup>13</sup>C NMR** (126 MHz, CDCl<sub>3</sub>) δ 150.2, 136.5, 127.8, 122.0, 121.2, 119.2, 119.1, 117.0, 111.2, 108.8, 36.3, 36.1, 31.8, 28.4, 27.7, 25.0, 22.7, 14.2.

**HRMS** (ESI) (*m/z*): calculated for C<sub>18</sub>H<sub>25</sub>N<sub>1</sub> [M-H]<sup>+</sup>: 254.1914; found 254.1917.

3-(4-methyleneheptyl)-1*H*-indole (**1c**)

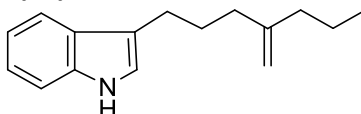

**<sup>1</sup>H NMR** (501 MHz, CDCl<sub>3</sub>) δ 7.71 (bs, 1H), 7.52 (d, *J* = 7.8 Hz, 1H), 7.21 (d, *J* = 8.2 Hz, 1H), 7.09 (t, *J* = 8.2 Hz, 1H), 7.02 (t, *J* = 7.4 Hz, 1H), 6.82 (d, *J* = 2.3 Hz, 1H), 4.66 (d, *J* = 6.6 Hz, 2H), 2.67 (t, *J* = 7.7 Hz, 2H), 2.03 (t, *J* = 7.7 Hz, 2H), 1.92 (t, *J* = 7.6 Hz, 2H), 1.83–1.72 (m, 2H), 1.39–1.34 (m, 2H), 0.81 (t, *J* = 7.3 Hz, 3H).

**<sup>13</sup>C NMR** (126 MHz, CDCl<sub>3</sub>) δ 149.8, 136.5, 127.7, 121.9, 121.2, 119.2, 119.1, 116.9, 111.2, 109.0, 38.4, 36.1, 28.3, 25.0, 21.0, 14.0.

**HRMS** (ESI) (*m/z*): calculated for C<sub>16</sub>H<sub>20</sub>N<sub>1</sub> [M-H]<sup>+</sup>: 226.1601; found 226.1604.

3-(4-methylenehexyl)-1*H*-indole (**1d**)<sup>7</sup>

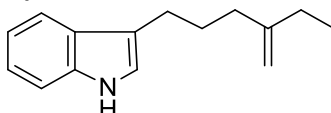

**<sup>1</sup>H NMR** (501 MHz, CDCl<sub>3</sub>) δ 7.90 (bs, 1H), 7.62 (d, *J* = 7.9 Hz, 1H), 7.36 (d, *J* = 8.1 Hz, 1H), 7.20 (td, *J* = 8.2, 1.2 Hz, 1H), 7.12 (td, *J* = 8.0, 1.0 Hz, 1H), 7.98 (s, 1H), 4.75 (s, 2H), 2.77 (t, *J* = 7.6 Hz, 2H), 2.16 (t, *J* = 7.7 Hz, 2H), 2.06 (q, *J* = 7.5 Hz, 2H), 1.89–1.85 (m, 2H), 1.04 (t, *J* = 7.4 Hz, 3H).

**<sup>13</sup>C NMR** (126 MHz, CDCl<sub>3</sub>) δ 151.6, 136.5, 127.8, 122.0, 121.2, 119.2, 119.1, 117.0, 111.2, 107.8, 36.3, 28.9, 28.4, 25.0, 12.5.

**HRMS** (EI) (*m/z*): calculated for C<sub>15</sub>H<sub>19</sub>N<sub>1</sub> [M]<sup>+</sup>: 213.1512; found 213.1511.

3-(7-methyl-4-methyleneoctyl)-1*H*-indole (**1e**)

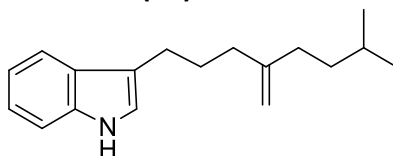

**<sup>1</sup>H NMR** (501 MHz, CDCl<sub>3</sub>) δ 7.93 (bs, 1H), 7.62 (d, *J* = 7.8 Hz, 1H), 7.37 (d, *J* = 8.2 Hz, 1H), 7.20 (td, *J* = 7.0, 1.2 Hz, 1H), 7.12 (td, *J* = 7.0, 1.1 Hz, 1H), 7.00 (dd, *J* = 2.3, 1.1 Hz, 1H), 4.74 (s, 2H), 2.77 (t, *J* = 7.1, 2H), 2.13 (t, *J* = 7.7 Hz, 2H), 2.06–1.98 (m, 2H), 1.89–1.83 (m, 2H), 1.57–1.50 (m, 1H), 1.36–1.23 (m, 2H), 0.89 (d, *J* = 6.6 Hz, 6H).

**<sup>13</sup>C NMR** (126 MHz, CDCl<sub>3</sub>) δ 150.4, 136.3, 127.6, 121.9, 121.2, 119.2, 119.1, 116.9, 111.2, 108.6, 37.1, 36.1, 34.1, 28.2, 27.9, 25.0, 22.7.

**HRMS** (EI) (*m/z*): calculated for C<sub>18</sub>H<sub>25</sub>N<sub>1</sub> [M]<sup>+</sup>: 255.1981; found 255.1981.

3-(7,7-dimethyl-4-methyleneoctyl)-1*H*-indole (**1f**)<sup>7</sup>

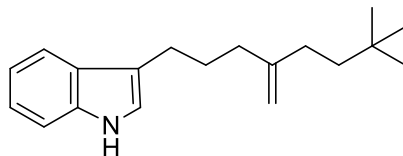

**<sup>1</sup>H NMR** (501 MHz, CDCl<sub>3</sub>) δ 7.90 (bs, 1H), 7.63 (d, *J* = 7.9 Hz, 1H), 7.36 (d, *J* = 8.2 Hz, 1H), 7.20 (td, *J* = 8.1, 1.2 Hz, 1H), 7.13 (td, *J* = 8.0, 1.1 Hz, 1H), 7.01–6.97 (m, 1H), 4.76 (d, *J* = 6.1 Hz, 2H), 2.78 (t, *J* = 7.7 Hz, 2H), 2.17 (t, *J* = 7.7 Hz, 2H), 2.04–1.97 (m, 2H), 1.93–1.84 (m, 2H), 1.38–1.30 (m, 2H), 0.91 (s, 9H).

**<sup>13</sup>C NMR** (126 MHz, CDCl<sub>3</sub>) δ 151.0, 136.5, 127.7, 122.0, 121.2, 119.2, 119.1, 117.0, 111.2, 108.5, 42.5, 36.4, 31.3, 30.4, 29.5, 28.4, 25.0.

**HRMS** (EI) (*m/z*): calculated for C<sub>19</sub>H<sub>27</sub>N<sub>1</sub> [*M*]<sup>+</sup>: 269.2138; found 269.2139.

3-(4-methylene-6-phenylhexyl)-1*H*-indole (**1g**)

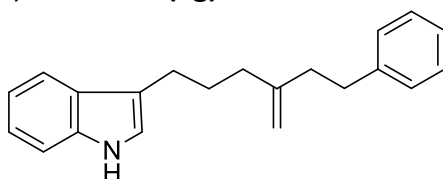

**<sup>1</sup>H NMR** (501 MHz, CDCl<sub>3</sub>) δ 7.81 (bs, 1H), 7.54 (d, *J* = 7.8 Hz, 1H), 7.28 (d, *J* = 8.1 Hz, 1H), 7.22–7.15 (m, 2H), 7.12–7.09 (m, 4H), 7.07–7.00 (m, 1H), 6.90 (d, *J* = 2.0 Hz, 1H), 4.72 (d, *J* = 1.8 Hz, 2H), 2.71–2.66 (m, 4H), 2.26 (t, *J* = 7.7 Hz, 2H), 2.10 (t, *J* = 7.7 Hz, 2H), 1.82 (q, *J* = 7.9 Hz, 2H).

**<sup>13</sup>C NMR** (126 MHz, CDCl<sub>3</sub>) δ 149.3, 142.4, 136.5, 128.5, 128.4, 127.7, 125.9, 122.0, 121.2, 119.3, 119.1, 116.9, 111.2, 109.5, 38.1, 36.3, 34.5, 28.3, 25.0.

**HRMS** (ESI) (*m/z*): calculated for C<sub>21</sub>H<sub>22</sub>N<sub>1</sub> [*M*-H]<sup>+</sup>: 288.1758; found 288.1760.

3-(4-phenylpent-4-en-1-yl)-1*H*-indole (**1h**)

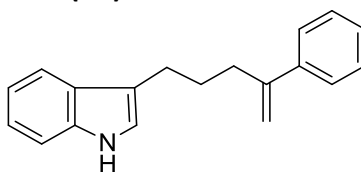

**<sup>1</sup>H NMR** (501 MHz, CDCl<sub>3</sub>) δ 7.83 (bs, 1H), 7.58 (d, *J* = 8.1 Hz, 1H), 7.48–7.43 (m, 2H), 7.39–7.28 (m, 4H), 7.25–7.19 (m, 1H), 7.16–7.12 (m, 1H), 6.95 (d, *J* = 2.2 Hz, 1H), 5.35 (dd, *J* = 3.1, 1.6 Hz, 1H), 5.14 (dd, *J* = 3.1, 1.6 Hz, 1H), 2.84 (t, *J* = 8.8 Hz, 2H), 2.66 (t, *J* = 8.8 Hz, 2H), 2.00–1.82 (m, 2H).

**<sup>13</sup>C NMR** (126 MHz, CDCl<sub>3</sub>) δ 148.6, 141.5, 136.5, 128.4, 127.7, 127.4, 126.3, 122.0, 121.3, 119.2, 119.1, 116.7, 112.5, 111.1, 35.3, 28.7, 24.8.

**HRMS** (EI) (*m/z*): calculated for C<sub>19</sub>H<sub>19</sub>N<sub>1</sub> [*M*]<sup>+</sup>: 261.1512; found 261.1514.

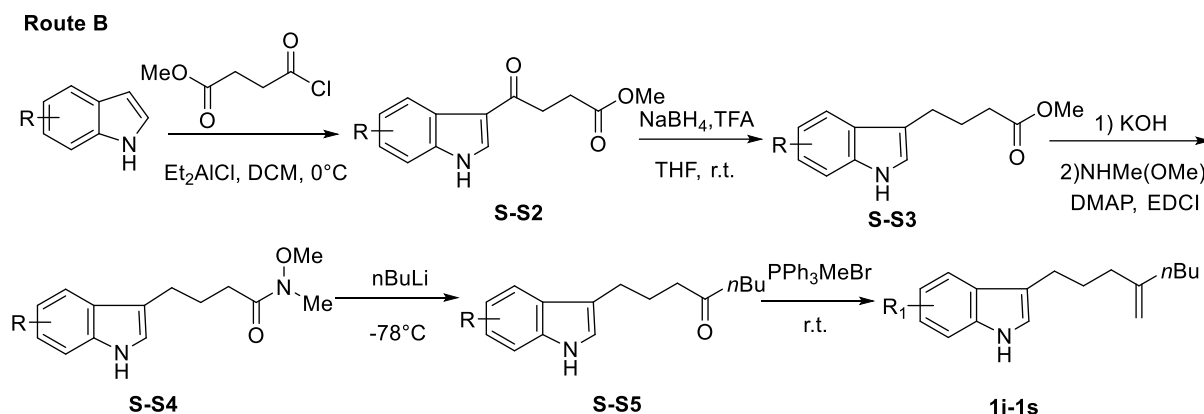

**General synthetic procedure of S-S2:** S-S2 was prepared following to the reported procedure for similar compounds.<sup>8</sup> Substituted-indole derivative (1 equiv.) was dissolved in 30 mL anhydrous dichloromethane and cooled to 0 °C. Diethyl aluminum chloride (1.0 M in hexane) (1.2 equiv.) was then added to the solution, which was stirred for 30 min. Still at 0 °C, methyl-4-chloro-4-oxobutanoate (1.2 equiv.) was then slowly added to the flask and reaction proceeded for 2 hours, gradually warming to room temperature. The reaction mixture was slowly quenched with ice-cold saturated NH<sub>4</sub>Cl solution, the organics were extracted in dichloromethane and washed with Rochelle's salt solution, dried over Na<sub>2</sub>SO<sub>4</sub>, and concentrated under reduced pressure to afford a crude solid. The crude product was purified by silica column chromatography (DCM:EtOAc = 15:1 then DCM:EtOAc = 10:1) or directly precipitation from hexane to afford desired product in 48 % to 65 % yield.

Methyl 4-(4-methyl-1*H*-indol-3-yl)-4-oxobutanoate

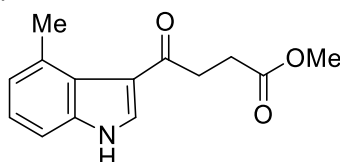

<sup>1</sup>H NMR (501 MHz, CDCl<sub>3</sub>) δ 9.00 (bs, 1H), 7.73 (d, *J* = 3.1 Hz, 1H), 7.18–7.13 (m 2H), 7.01 (d, *J* = 6.9 Hz, 1H), 3.71 (s, 3H), 3.15 (t, *J* = 6.7 Hz, 2H), 2.78–2.77 (m, 5H).

<sup>13</sup>C NMR (126 MHz, CDCl<sub>3</sub>) δ 193.0, 174.1, 137.3, 133.6, 131.9, 124.6, 124.3, 124.1, 119.8, 109.0, 51.9, 35.1, 28.7, 23.2.

HRMS (EI) (*m/z*): calculated for C<sub>14</sub>H<sub>15</sub>N<sub>1</sub>O<sub>3</sub> [*M*]<sup>+</sup>: 245.1046; found 245.1049.

Methyl 4-(5-methyl-1*H*-indol-3-yl)-4-oxobutanoate

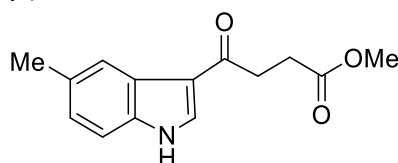

<sup>1</sup>H NMR (501 MHz, CDCl<sub>3</sub>) δ 8.64 (bs, 1H), 8.18 (s, 1H), 7.87 (t, *J* = 3.1 Hz, 1H), 7.29 (d, *J* = 8.3 Hz, 1H), 7.10 (d, *J* = 8.2 Hz, 1H), 3.71 (s, 3H), 3.22 (td, *J* = 6.9, 1.5 Hz, 2H), 2.80 (t, *J* = 6.9 Hz, 2H), 2.47 (s, 3H).

<sup>13</sup>C NMR (126 MHz, CDCl<sub>3</sub>) δ 193.8, 174.1, 134.7, 132.4, 131.4, 125.8, 125.3, 122.1, 117.3, 111.1, 52.0, 34.3, 28.4, 21.7.

HRMS (EI) (*m/z*): calculated for C<sub>14</sub>H<sub>16</sub>N<sub>1</sub>O<sub>3</sub> [*M*+H]<sup>+</sup>: 246.1125; found 246.1128.

Methyl 4-(6-methyl-1*H*-indol-3-yl)-4-oxobutanoate

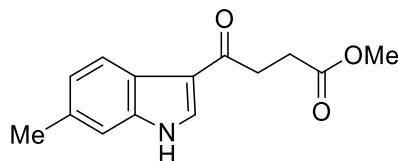

**<sup>1</sup>H NMR** (501 MHz, CDCl<sub>3</sub>) δ 8.68 (bs, 1H), 8.14 (d, *J* = 8.2 Hz, 1H), 7.70 (t, *J* = 2.7 Hz, 1H), 7.10 (s, 1H), 7.03 (dd, *J* = 8.2, 1.4 Hz, 1H), 3.64 (s, 3H), 3.12 (t, *J* = 6.9 Hz, 2H), 2.72 (t, *J* = 6.8 Hz, 2H), 2.38 (s, 3H).

**<sup>13</sup>C NMR** (126 MHz, CDCl<sub>3</sub>) δ 193.6, 174.0, 136.8, 133.9, 130.7, 124.6, 123.3, 122.1, 117.8, 111.4, 52.0, 34.3, 28.4, 21.8.

**HRMS (EI)** (*m/z*): calculated for C<sub>14</sub>H<sub>16</sub>N<sub>1</sub>O<sub>3</sub> [M+H]<sup>+</sup>: 246.1125; found 246.1124.

Methyl 4-(7-methyl-1*H*-indol-3-yl)-4-oxobutanoate

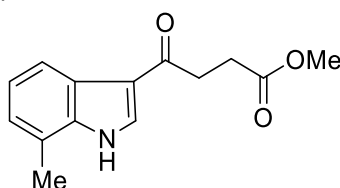

The analytic data was identical to the reported value.<sup>9</sup>

Methyl 4-(1*H*-benzo[*g*]indol-3-yl)-4-oxobutanoate

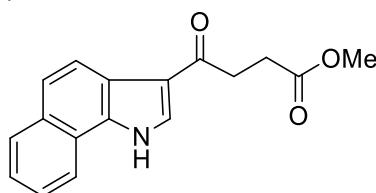

**<sup>1</sup>H NMR** (501 MHz, DMSO-*d*<sub>6</sub>) δ 12.79 (s, 1H), 8.44 (dd, *J* = 11.1, 5.6 Hz, 2H), 8.28 (d, *J* = 8.7 Hz, 1H), 7.97 (d, *J* = 8.1 Hz, 1H), 7.64 (d, *J* = 8.7 Hz, 1H), 7.60 (t, *J* = 7.6 Hz, 1H), 7.48 (t, *J* = 7.5 Hz, 1H), 3.61 (s, 3H), 3.27 (t, *J* = 6.6 Hz, 2H), 2.69 (t, *J* = 6.5 Hz, 2H).

**<sup>13</sup>C NMR** (126 MHz, DMSO-*d*<sub>6</sub>) δ 193.7, 173.1, 131.4, 130.1, 128.4, 125.9, 124.5, 122.3, 121.7, 121.5, 120.8, 117.4, 51.3, 33.7, 27.8.

**HRMS (ESI)** (*m/z*): calculated for C<sub>17</sub>H<sub>14</sub>N<sub>1</sub>O<sub>3</sub> [M-H]<sup>-</sup>: 280.0979; found 280.0980.

Methyl 4-oxo-4-(1,6,7,8-tetrahydrocyclopenta[*g*]indol-3-yl)butanoate

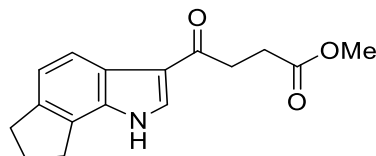

**<sup>1</sup>H NMR** (501 MHz, CDCl<sub>3</sub>) δ 8.49 (bs, 1H), 8.16 (d, *J* = 8.1 Hz, 1H), 7.85 (d, *J* = 3.1 Hz, 1H), 7.20 (d, *J* = 8.1 Hz, 1H), 3.71 (s, 3H), 3.24 (t, *J* = 6.9 Hz, 2H), 3.05 (t, *J* = 7.4 Hz, 4H), 2.81 (t, *J* = 6.9 Hz, 2H), 2.23–2.19 (m, 2H).

**<sup>13</sup>C NMR** (126 MHz, CDCl<sub>3</sub>) δ 193.7, 174.1, 140.6, 133.6, 130.6, 125.8, 124.0, 120.4, 119.7, 118.4, 52.0, 34.4, 33.2, 29.9, 28.4, 25.5.

**HRMS (EI)** (*m/z*): calculated for C<sub>16</sub>H<sub>17</sub>N<sub>1</sub>O<sub>1</sub> [M]<sup>+</sup>: 271.1203; found 271.1206.

Methyl 4-(6-bromo-1*H*-indol-3-yl)-4-oxobutanoate

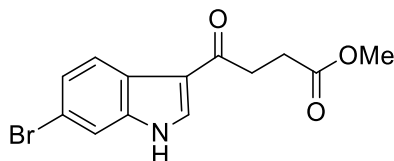

**<sup>1</sup>H NMR** (501 MHz, CDCl<sub>3</sub>) δ 8.71 (bs, 1H), 8.23 (d, *J* = 8.6 Hz, 1H), 7.86 (d, *J* = 3.0 Hz, 1H), 7.56 (d, *J* = 1.8 Hz, 1H), 7.38 (dd, *J* = 8.6, 1.8 Hz, 1H), 3.72 (s, 3H), 3.21 (t, *J* = 7.1 Hz, 2H), 2.80 (t, *J* = 8.0 Hz, 2H).

**<sup>13</sup>C NMR** (126 MHz, CDCl<sub>3</sub>) δ 193.5, 174.0, 137.2, 131.6, 126.0, 124.4, 123.7, 117.6, 117.3, 114.6, 52.1, 34.2, 28.2.

**HRMS** (EI) (*m/z*): calculated for C<sub>13</sub>H<sub>12</sub>N<sub>1</sub>O<sub>3</sub>Br<sub>1</sub> [*M*]<sup>+</sup>: 308.9995; found 308.9996.

Methyl 4-(6-chloro-1*H*-indol-3-yl)-4-oxobutanoate

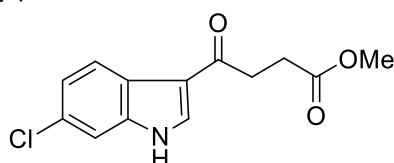

**<sup>1</sup>H NMR** (501 MHz, CDCl<sub>3</sub>) δ 8.73 (bs, 1H), 8.27 (d, *J* = 8.5 Hz, 1H), 7.85 (d, *J* = 2.9 Hz, 1H), 7.39 (d, *J* = 1.8 Hz, 1H), 7.24 (dd, *J* = 8.7, 1.9 Hz, 1H), 3.72 (s, 3H), 3.20 (t, *J* = 6.7 Hz, 2H), 2.80 (t, *J* = 6.7 Hz, 2H).

**<sup>13</sup>C NMR** (126 MHz, CDCl<sub>3</sub>) δ 193.5, 174.0, 136.8, 131.5, 129.8, 124.1, 123.6, 123.5, 117.8, 111.5, 52.1, 34.3, 28.2.

**HRMS** (EI) (*m/z*): calculated for C<sub>13</sub>H<sub>12</sub>N<sub>1</sub>O<sub>3</sub>Cl<sub>1</sub> [*M*]<sup>+</sup>: 265.0500; found 265.0503.

Methyl 4-(6-fluoro-1*H*-indol-3-yl)-4-oxobutanoate

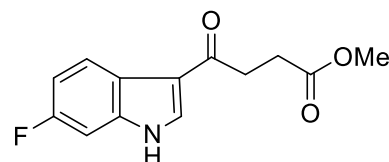

**<sup>1</sup>H NMR** (501 MHz, DMSO-*d*<sub>6</sub>) δ 11.70 (s, 1H), 8.11 (d, *J* = 3.0 Hz, 1H), 7.86 (dd, *J* = 8.7, 5.6 Hz, 1H), 6.99 (dd, *J* = 9.7, 2.4 Hz, 1H), 6.77 (td, *J* = 9.3, 2.4 Hz, 1H), 3.06 (s, 2H), 2.91 (t, *J* = 6.5 Hz, 2H), 2.38 (t, *J* = 6.5 Hz, 2H).

**<sup>13</sup>C NMR** (126 MHz, DMSO-*d*<sub>6</sub>) δ 193.1, 173.1, 160.1, 158.3, 136.6, 134.5, 122.4, 122.0, 115.8, 110.1, 109.9, 98.4, 98.2, 51.3, 33.3, 27.7.

**<sup>19</sup>F NMR** (471 MHz, DMSO-*d*<sub>6</sub>) δ -119.7 (d, *J* = 5.5 Hz).

**HRMS** (EI) (*m/z*): calculated for C<sub>13</sub>H<sub>12</sub>N<sub>1</sub>O<sub>3</sub>F<sub>1</sub> [*M*]<sup>+</sup>: 249.0796; found 249.0798.

Methyl 4-(6-methoxy-1*H*-indol-3-yl)-4-oxobutanoate

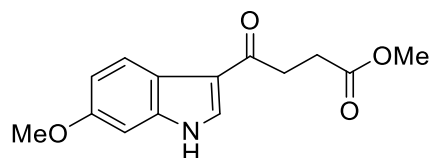

**<sup>1</sup>H NMR** (501 MHz, DMSO-*d*<sub>6</sub>) δ 11.73 (s, 1H), 8.22 (d, *J* = 3.0 Hz, 1H), 8.00 (d, *J* = 8.7 Hz, 1H), 6.95 (d, *J* = 2.3 Hz, 1H), 6.81 (dd, *J* = 8.7, 2.3 Hz, 1H), 3.78 (s, 3H), 3.60 (s, 3H), 3.15 (t, *J* = 6.6 Hz, 2H), 2.63 (t, *J* = 6.5 Hz, 2H).

**<sup>13</sup>C NMR** (126 MHz, DMSO-*d*<sub>6</sub>) δ 192.9, 173.1, 156.3, 137.4, 132.7, 121.8, 119.3, 115.9, 111.5, 95.1, 55.2, 51.3, 33.2, 27.8.

**HRMS** (EI) ( $m/z$ ): calculated for  $C_{14}H_{15}N_1O_4$   $[M]^+$ : 261.0996; found 261.0997.

Methyl 4-(6-(benzyloxy)-1*H*-indol-3-yl)-4-oxobutanoate

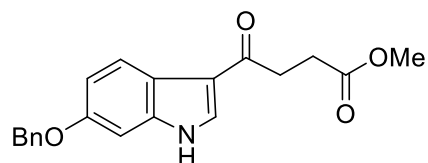

**$^1H$  NMR** (501 MHz,  $CDCl_3$ )  $\delta$  8.61 (bs, 1H), 7.99 (d,  $J$  = 2.5 Hz, 1H), 7.84 (d,  $J$  = 3.2 Hz, 1H), 7.48 (d,  $J$  = 7.3 Hz, 2H), 7.43–7.35 (m, 2H), 7.34–7.31 (m, 1H), 7.29 (d,  $J$  = 8.8 Hz, 1H), 7.00 (dd,  $J$  = 8.8, 2.5 Hz, 1H), 5.12 (s, 2H), 3.72 (s, 3H), 3.21 (t,  $J$  = 6.8 Hz, 2H), 2.80 (t,  $J$  = 6.8 Hz, 2H).

**$^{13}C$  NMR** (126 MHz,  $CDCl_3$ )  $\delta$  193.7, 174.0, 155.8, 137.5, 131.4, 128.7, 128.0, 127.8, 126.4, 117.7, 115.2, 112.3, 105.0, 70.7, 52.0, 34.2, 28.3.

**HRMS** (EI) ( $m/z$ ): calculated for  $C_{20}H_{19}N_1O_4$   $[M+H]^+$ : 337.1309; found 337.1309.

**General synthetic procedure of S-S3:** In a two-neck round-bottomed flask fitted with a magnetic stirring bar,  $NaBH_4$  (2 equiv.) was added to a stirred solution of **S-S2** (1 equiv.) in THF (20 mL). Trifluoroacetic acid (1 equiv.) was then added dropwise. The reaction was stirred at room temperature and monitored by TLC and GC-MS upon full conversion of the starting material (generally 2h). Then the reaction was carefully quenched with cold 1M NaOH solution and extracted with EtOAc for 3 times. The combined organic layers were dried over  $Na_2SO_4$ , and concentrated under reduced pressure. The residue was purified by silica column chromatography (hexane:EtOAc = 3:1) to afford product in 40 % to 55 % yield.

Methyl 4-(4-methyl-1*H*-indol-3-yl)butanoate

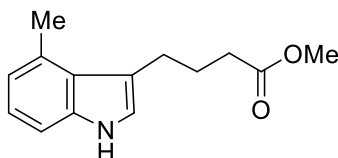

**$^1H$  NMR** (501 MHz,  $CDCl_3$ )  $\delta$  7.94 (bs, 1H), 7.18 (d,  $J$  = 8.1 Hz, 1H), 7.05 (t,  $J$  = 7.6 Hz, 1H), 6.95 (s, 1H), 6.84 (d,  $J$  = 7.1 Hz, 1H), 3.67 (s, 3H), 2.96 (t,  $J$  = 7.6 Hz, 2H), 2.70 (s, 3H), 2.44 (t,  $J$  = 7.5 Hz, 2H), 2.03 (p,  $J$  = 7.5 Hz, 2H).

**$^{13}C$  NMR** (126 MHz,  $CDCl_3$ )  $\delta$  174.3, 137.0, 131.0, 126.0, 122.1, 121.8, 121.1, 116.7, 109.1, 51.6, 33.8, 26.7, 26.7, 20.4

**HRMS** (ESI) ( $m/z$ ): calculated for  $C_{14}H_{16}N_1O_2$   $[M-H]^-$ : 230.1187; found 230.1187.

Methyl 4-(5-methyl-1*H*-indol-3-yl)butanoate

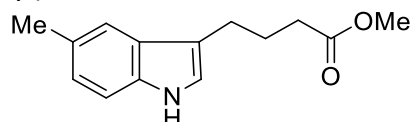

**$^1H$  NMR** (501 MHz,  $CDCl_3$ )  $\delta$  8.17 (bs, 1H), 7.57 (s, 1H), 7.32 (d,  $J$  = 8.2 Hz, 1H), 7.18 (dd,  $J$  = 8.4, 1.5 Hz, 1H), 6.98 (d,  $J$  = 2.3 Hz, 1H), 3.83 (s, 3H), 2.93 (t,  $J$  = 7.4 Hz, 2H), 2.65 (s, 3H), 2.56 (t,  $J$  = 7.5 Hz, 2H), 2.21 (p,  $J$  = 7.5 Hz, 2H).

**$^{13}C$  NMR** (126 MHz,  $CDCl_3$ )  $\delta$  174.5, 134.6, 128.1, 127.5, 123.3, 121.8, 118.4, 114.5, 110.9, 51.5, 33.6, 25.3, 24.4, 21.5.

**HRMS** (EI) ( $m/z$ ): calculated for  $C_{14}H_{17}N_1O_2$   $[M]^+$ : 231.1254; found 231.1254.

Methyl 4-(6-methyl-1*H*-indol-3-yl)butanoate

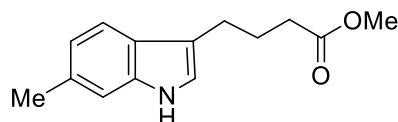

**<sup>1</sup>H NMR** (501 MHz, CDCl<sub>3</sub>) δ 7.84 (bs, 1H), 7.50 (d, *J* = 8.0 Hz, 1H), 7.14 (d, *J* = 1.6 Hz, 1H), 6.97 (dd, *J* = 8.0, 1.5 Hz, 1H), 6.90 (dd, *J* = 2.2, 1.1 Hz, 1H), 3.68 (s, 3H), 2.80 (t, *J* = 7.4 Hz, 2H), 2.48 (s, 3H), 2.40 (t, *J* = 7.5 Hz, 2H), 2.06 (p, *J* = 7.5 Hz, 2H).

**<sup>13</sup>C NMR** (126 MHz, CDCl<sub>3</sub>) δ 174.4, 137.0, 131.8, 125.4, 121.1, 118.7, 115.5, 111.2, 51.6, 33.8, 25.5, 24.7, 21.8.

**HRMS** (EI) (*m/z*): calculated for C<sub>14</sub>H<sub>17</sub>N<sub>1</sub>O<sub>2</sub> [*M*]<sup>+</sup>: 231.1256; found 231.1254.

Methyl 4-(7-methyl-1*H*-indol-3-yl)butanoate

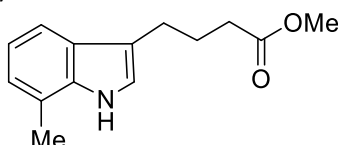

The analytic data was identical to the reported value.<sup>9</sup>

Methyl 4-(1*H*-benzo[*g*]indol-3-yl)butanoate

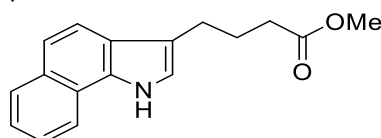

**<sup>1</sup>H NMR** (501 MHz, CDCl<sub>3</sub>) δ 8.72 (bs, 1H), 7.95 (dd, *J* = 24.6, 8.2 Hz, 2H), 7.70 (d, *J* = 8.7 Hz, 1H), 7.51 (t, *J* = 7.5 Hz, 2H), 7.42 (t, *J* = 7.5 Hz, 1H), 7.05 (s, 1H), 3.67 (s, 3H), 2.88 (t, *J* = 7.5 Hz, 2H), 2.42 (t, *J* = 7.5 Hz, 2H), 2.10 (p, *J* = 7.4 Hz, 2H).

**<sup>13</sup>C NMR** (126 MHz, CDCl<sub>3</sub>) 174.4, 131.0, 130.6, 129.0, 125.5, 124.0, 123.3, 121.9, 120.3, 119.8, 119.5, 119.1, 117.6, 51.6, 33.8, 25.9, 24.7.

**HRMS** (ESI) (*m/z*): calculated for C<sub>17</sub>H<sub>18</sub>N<sub>1</sub>O<sub>2</sub> [*M*+*H*]<sup>+</sup>: 268.1332; found 268.1333.

Methyl 4-(1,6,7,8-tetrahydrocyclopenta[*g*]indol-3-yl)butanoate

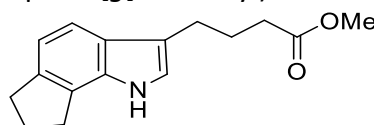

**<sup>1</sup>H NMR** (501 MHz, CDCl<sub>3</sub>) δ 7.78 (bs, 1H), 7.43 (d, *J* = 8.0 Hz, 1H), 7.06 (d, *J* = 8.0 Hz, 1H), 6.93 (s, 1H), 3.67 (s, 3H), 3.07-3.04 (m, 4H), 2.81 (t, *J* = 7.4 Hz, 2H), 2.39 (t, *J* = 7.5 Hz, 2H), 2.22 (p, *J* = 7.4 Hz, 2H), 2.06 (p, *J* = 7.4 Hz, 2H).

**<sup>13</sup>C NMR** (126 MHz, CDCl<sub>3</sub>) δ 174.4, 138.6, 133.7, 126.2, 125.6, 120.8, 117.1, 116.3, 51.6, 33.8, 33.2, 30.0, 25.6, 25.5, 24.8.

**HRMS** (EI) (*m/z*): calculated for C<sub>16</sub>H<sub>19</sub>N<sub>1</sub>O<sub>2</sub> [*M*]<sup>+</sup>: 257.1410; found 257.1413.

Methyl 4-(6-bromo-1*H*-indol-3-yl)butanoate

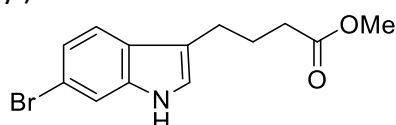

**<sup>1</sup>H NMR** (501 MHz, CDCl<sub>3</sub>) δ 7.97 (bs, 1H), 7.50 (dd, *J* = 1.7, 0.5 Hz, 1H), 7.45 (d, *J* = 8.4 Hz, 1H), 7.21 (dd, *J* = 8.5, 1.7 Hz, 1H), 6.96 (d, *J* = 2.1 Hz, 1H), 3.66 (s, 3H), 2.78 (t, *J* = 7.5 Hz, 2H), 2.38

(t,  $J = 7.4$  Hz, 2H), 2.02 (p,  $J = 7.5$  Hz, 2H).

**$^{13}\text{C}$  NMR** (126 MHz,  $\text{CDCl}_3$ )  $\delta$  174.2, 137.3, 126.5, 122.7, 122.1, 120.3, 116.0, 115.7, 114.1, 51.7, 33.7, 25.4, 24.5.

**HRMS** (EI) ( $m/z$ ): calculated for  $\text{C}_{13}\text{H}_{14}\text{N}_1\text{O}_2\text{Br}_1$   $[\text{M}]^+$ : 295.0203; found 295.0203.

Methyl 4-(6-chloro-1*H*-indol-3-yl)butanoate

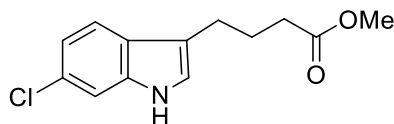

**$^1\text{H}$  NMR** (501 MHz,  $\text{CDCl}_3$ )  $\delta$  8.00 (bs, 1H), 7.50 (d,  $J = 8.4$  Hz, 1H), 7.33 (dd,  $J = 1.8, 0.6$  Hz, 1H), 7.08 (dd,  $J = 8.5, 1.8$  Hz, 1H), 6.97 (dd,  $J = 2.2, 1.1$  Hz, 1H), 3.66 (s, 3H), 2.77 (t,  $J = 7.5$  Hz, 2H), 2.38 (t,  $J = 7.4$  Hz, 2H), 2.03 (p,  $J = 7.5$  Hz, 2H).

**$^{13}\text{C}$  NMR** (126 MHz,  $\text{CDCl}_3$ )  $\delta$  174.3, 136.8, 128.0, 126.2, 122.2, 120.1, 119.9, 115.9, 111.1, 51.7, 33.7, 25.4, 24.5.

**HRMS** (EI) ( $m/z$ ): calculated for  $\text{C}_{13}\text{H}_{14}\text{N}_1\text{O}_2\text{Cl}_1$   $[\text{M}]^+$ : 251.0708; found 251.0711.

Methyl 4-(6-fluoro-1*H*-indol-3-yl)butanoate

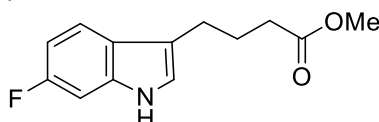

**$^1\text{H}$  NMR** (501 MHz,  $\text{CDCl}_3$ )  $\delta$  7.98 (bs, 1H), 7.50 (dd,  $J = 8.7, 5.3$  Hz, 1H), 7.03 (dd,  $J = 9.7, 2.3$  Hz, 1H), 6.96 (dd,  $J = 2.1, 1.0$  Hz, 1H), 6.88 (ddd,  $J = 9.6, 8.7, 2.2$  Hz, 1H), 3.67 (s, 3H), 2.78 (t,  $J = 7.5$  Hz, 2H), 2.39 (t,  $J = 7.4$  Hz, 2H), 2.11–1.97 (m, 2H).

**$^{13}\text{C}$  NMR** (126 MHz,  $\text{CDCl}_3$ )  $\delta$  174.3, 161.1, 136.4, 124.2, 121.8, 119.7, 115.9, 108.00, 97.4, 51.6, 33.8, 25.4, 24.6.

**HRMS** (EI) ( $m/z$ ): calculated for  $\text{C}_{13}\text{H}_{14}\text{N}_1\text{O}_2\text{F}_1$   $[\text{M}]^+$ : 235.1003; found 235.1006.

Methyl 4-(6-methoxy-1*H*-indol-3-yl)butanoate

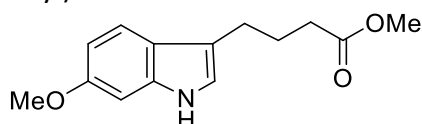

**$^1\text{H}$  NMR** (501 MHz,  $\text{CDCl}_3$ )  $\delta$  7.94 (bs, 1H), 7.48 (d,  $J = 8.5$  Hz, 1H), 6.86 (d,  $J = 2.2$  Hz, 1H), 6.84–6.78 (m, 2H), 3.84 (s, 3H), 3.68 (s, 3H), 2.78 (t,  $J = 7.5$  Hz, 2H), 2.40 (t,  $J = 7.5$  Hz, 2H), 2.05 (p,  $J = 7.5$  Hz, 2H).

**$^{13}\text{C}$  NMR** (126 MHz,  $\text{CDCl}_3$ )  $\delta$  174.4, 156.5, 137.2, 122.0, 120.4, 119.5, 115.5, 109.2, 94.8, 55.8, 51.6, 33.8, 25.4, 24.7.

**HRMS** (EI) ( $m/z$ ): calculated for  $\text{C}_{14}\text{H}_{17}\text{N}_1\text{O}_3$   $[\text{M}]^+$ : 247.1203; found 247.1208.

Methyl 4-(6-(benzyloxy)-1*H*-indol-3-yl)butanoate

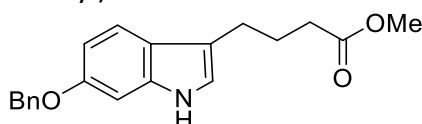

**$^1\text{H}$  NMR** (501 MHz,  $\text{CDCl}_3$ )  $\delta$  7.90 (bs, 1H), 7.54–7.48 (m, 2H), 7.43–7.38 (m, 2H), 7.36–7.31 (m, 1H), 7.24 (d,  $J = 8.8$  Hz, 1H), 7.15 (d,  $J = 2.4$  Hz, 1H), 6.95 (dd,  $J = 8.9, 2.4$  Hz, 2H), 5.13 (s, 2H), 3.68 (s, 3H), 2.77 (t,  $J = 7.3$  Hz, 2H), 2.40 (t,  $J = 7.4$  Hz, 2H), 2.04 (p,  $J = 7.4$  Hz, 2H).

**$^{13}\text{C}$  NMR** (126 MHz,  $\text{CDCl}_3$ )  $\delta$  174.3, 153.2, 137.8, 131.9, 128.6, 127.9, 127.9, 127.8, 122.5, 115.4, 112.9, 111.9, 102.7, 71.2, 51.6, 33.8, 25.3, 24.6.

**HRMS** (EI) ( $m/z$ ): calculated for  $C_{20}H_{21}N_1O_3$   $[M]^+$ : 323.1516; found 323.1518.

**General synthetic procedure of S-S4:** To a solution of **S-S3** (1 equiv.) in MeOH:H<sub>2</sub>O = 1:1 was added KOH (3 equiv.), the solution mixture was stirred at 80 °C with a condenser for 2 hours. Then the mixture was extracted by DCM and saturated NH<sub>4</sub>Cl. The organic layer was separated and dried over Na<sub>2</sub>SO<sub>4</sub>, and concentrated under reduced pressure. To a solution of the crude residue in DCM were added *N,O*-dimethylhydroxylamine hydrochloride (1.2 equiv.), DMAP (1.2 equiv.) and EDCI (1.2 equiv.) sequentially at room temperature. The mixture was stirred for 4 h then followed by extraction with DCM and washed with saturated NH<sub>4</sub>Cl. The combined organic layers were collected and dried over Na<sub>2</sub>SO<sub>4</sub>, and concentrated under reduced pressure. The residue was purified by silica column chromatography (hexane:EtOAc = 1:2) to afford product in 85 % to 90 % yield.

*N*-methoxy-*N*-methyl-4-(4-methyl-1*H*-indol-3-yl)butanamide

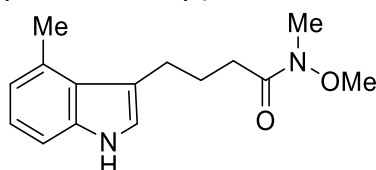

**<sup>1</sup>H NMR** (501 MHz, CDCl<sub>3</sub>)  $\delta$  7.97 (bs, 1H), 7.18 (d,  $J$  = 8.1 Hz, 1H), 7.04 (t,  $J$  = 7.6 Hz, 1H), 7.97 (d,  $J$  = 1.1, 1H), 6.83 (d,  $J$  = 7.1 Hz, 1H), 3.66 (s, 3H), 3.19 (s, 3H), 2.99 (t,  $J$  = 7.7 Hz, 2H), 2.71 (s, 3H), 2.56 (t,  $J$  = 7.6 Hz, 2H), 2.05 (t,  $J$  = 7.6 Hz, 2H).

**<sup>13</sup>C NMR** (126 MHz, CDCl<sub>3</sub>)  $\delta$  174.8, 137.0, 131.1, 126.1, 122.1, 121.7, 121.0, 117.2, 109.1, 61.3, 31.8, 27.0, 26.2, 20.4.

**HRMS** (ESI) ( $m/z$ ): calculated for  $C_{15}H_{19}N_2O_2$   $[M-H]^+$ : 259.1452; found 259.1455.

*N*-methoxy-*N*-methyl-4-(5-methyl-1*H*-indol-3-yl)butanamide

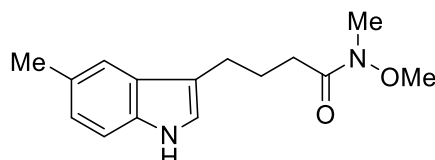

**<sup>1</sup>H NMR** (501 MHz, CDCl<sub>3</sub>)  $\delta$  7.85 (bs, 1H), 7.40 (s, 1H), 7.24 (d,  $J$  = 8.2 Hz, 1H), 7.00 (dd,  $J$  = 8.2, 1.6 Hz, 1H), 6.97 (s, 1H), 3.61 (s, 3H), 3.18 (s, 3H), 2.80 (t,  $J$  = 7.6 Hz, 2H), 2.51 (t,  $J$  = 7.6 Hz, 2H), 2.45 (s, 3H), 2.06 (p, 2H).

**<sup>13</sup>C NMR** (126 MHz, CDCl<sub>3</sub>)  $\delta$  174.9, 134.8, 128.5, 127.9, 123.6, 121.6, 118.8, 115.7, 110.8, 61.3, 31.7, 25.0, 24.9, 21.7.

**HRMS** (EI) ( $m/z$ ): calculated for  $C_{15}H_{20}N_2O_2$   $[M]^+$ : 260.1519; found 260.1523.

*N*-methoxy-*N*-methyl-4-(6-methyl-1*H*-indol-3-yl)butanamide

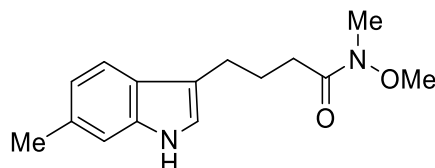

**<sup>1</sup>H NMR** (501 MHz, CDCl<sub>3</sub>)  $\delta$  7.89 (bs, 1H), 7.50 (d,  $J$  = 8.0 Hz, 1H), 7.14 (s, 1H), 6.97 – 6.87 (m, 2H), 3.61 (s, 3H), 3.18 (s, 3H), 2.81 (t,  $J$  = 7.6 Hz, 2H), 2.51 (t,  $J$  = 7.6 Hz, 2H), 2.46 (s, 3H), 2.07 (p,  $J$  = 7.5 Hz, 2H).

**<sup>13</sup>C NMR** (126 MHz, CDCl<sub>3</sub>)  $\delta$  174.8, 137.0, 131.7, 125.6, 121.0, 120.8, 118.8, 116.0, 111.1, 61.3,

32.4, 31.7, 25.0, 24.9, 21.8.

**HRMS** (EI) (*m/z*): calculated for C<sub>15</sub>H<sub>20</sub>N<sub>2</sub>O<sub>2</sub> [M]<sup>+</sup>: 260.1519; found 260.1522.

*N*-methoxy-*N*-methyl-4-(7-methyl-1*H*-indol-3-yl)butanamide

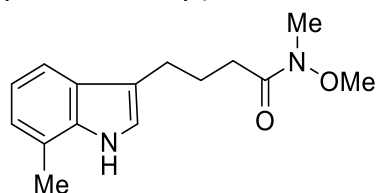

**<sup>1</sup>H NMR** (501 MHz, CDCl<sub>3</sub>) δ 7.94 (bs, 1H), 7.48 (d, *J* = 7.7 Hz, 1H), 7.12–6.94 (m, 3H), 3.62 (s, 3H), 3.18 (s, 3H), 2.83 (t, *J* = 7.7 Hz, 2H), 2.51 (t, *J* = 6.4 Hz, 2H), 2.48 (s, 3H), 2.15–2.01 (m, 2H).

**<sup>13</sup>C NMR** (126 MHz, CDCl<sub>3</sub>) δ 173.9, 135.1, 126.2, 121.5, 120.2, 119.3, 118.5, 115.9, 115.7, 60.3, 30.7, 28.9, 24.1, 24.0, 15.7.

**HRMS** (ESI) (*m/z*): calculated for C<sub>15</sub>H<sub>20</sub>N<sub>2</sub>O<sub>2</sub> [M]<sup>+</sup>: 260.1519; found 260.1521.

4-(1*H*-benzo[*g*]indol-3-yl)-*N*-methoxy-*N*-methylbutanamide

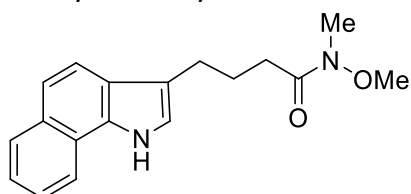

**<sup>1</sup>H NMR** (501 MHz, CDCl<sub>3</sub>) δ 8.90 (bs, 1H), 8.01 (d, *J* = 8.2 Hz, 1H), 7.92 (d, *J* = 8.1 Hz, 1H), 7.71 (d, *J* = 8.6 Hz, 1H), 7.50 (dd, *J* = 8.4, 4.1 Hz, 2H), 7.41 (t, *J* = 7.5 Hz, 1H), 7.07 (s, 1H), 3.61 (s, 3H), 3.19 (s, 3H), 2.90 (t, *J* = 7.5 Hz, 2H), 2.55 (t, *J* = 7.5 Hz, 2H), 2.12 (p, *J* = 7.6 Hz, 2H).

**<sup>13</sup>C NMR** (126 MHz, CDCl<sub>3</sub>) δ 175.0, 131.0, 130.6, 129.0, 125.4, 123.9, 123.4, 122.0, 120.1, 119.8, 119.6, 119.3, 117.9, 61.3, 31.6, 29.9, 25.4, 24.9.

**HRMS** (ESI) (*m/z*): calculated for C<sub>18</sub>H<sub>21</sub>N<sub>2</sub>O<sub>2</sub> [M+H]<sup>+</sup>: 297.1598; found 297.1595.

*N*-methoxy-*N*-methyl-4-(1,6,7,8-tetrahydrocyclopenta[*g*]indol-3-yl)butanamide

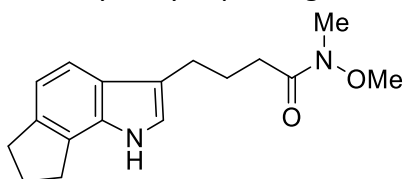

**<sup>1</sup>H NMR** (501 MHz, CDCl<sub>3</sub>) δ 7.99 (bs, 1H), 7.45 (d, *J* = 8.0 Hz, 1H), 7.05 (d, *J* = 8.0 Hz, 1H), 6.94 (s, 1H), 3.64 (s, 3H), 3.20 (s, 3H), 3.04 (dt, *J* = 14.1, 7.3 Hz, 4H), 2.84 (t, *J* = 7.5 Hz, 2H), 2.54 (t, *J* = 7.6 Hz, 2H), 2.21 (p, *J* = 7.4 Hz, 2H), 2.10 (p, *J* = 7.5 Hz, 2H).

**<sup>13</sup>C NMR** (126 MHz, CDCl<sub>3</sub>) δ 174.9, 138.4, 133.7, 126.3, 125.5, 120.7, 117.1, 116.6, 116.1, 61.3, 33.2, 32.2, 31.7, 29.9, 25.5, 25.1, 25.0.

**HRMS** (ESI) (*m/z*): calculated for C<sub>17</sub>H<sub>21</sub>N<sub>2</sub>O<sub>3</sub> [M-H]<sup>-</sup>: 285.1609; found 285.1611.

4-(6-bromo-1*H*-indol-3-yl)-*N*-methoxy-*N*-methylbutanamide

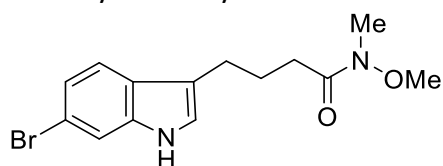

**<sup>1</sup>H NMR** (501 MHz, CDCl<sub>3</sub>) δ 8.06 (bs, 1H), 7.50 (d, *J* = 1.7 Hz, 1H), 7.47 (d, *J* = 8.5 Hz, 1H), 7.20 (dd, *J* = 8.4, 1.7 Hz, 1H), 6.97 (dd, *J* = 2.2, 1.1 Hz, 1H), 3.61 (s, 3H), 3.18 (s, 3H), 2.79 (t, *J* = 7.4

Hz, 2H), 2.49 (t,  $J = 7.5$  Hz, 2H), 2.04 (p,  $J = 7.2$  Hz, 2H).

**$^{13}\text{C}$  NMR** (126 MHz,  $\text{CDCl}_3$ )  $\delta$  174.5, 137.3, 126.6, 122.5, 122.1, 120.4, 116.4, 115.6, 114.1, 61.3, 31.6, 29.8, 25.0, 24.7.

**HRMS** (EI) ( $m/z$ ): calculated for  $\text{C}_{14}\text{H}_{17}\text{N}_2\text{O}_2\text{Br}_1$  [ $\text{M}$ ] $^+$ : 324.0468; found 324.0471.

4-(6-chloro-1*H*-indol-3-yl)-*N*-methoxy-*N*-methylbutanamide

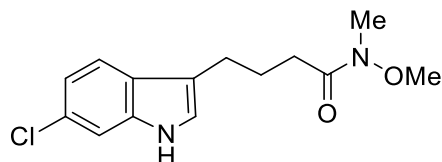

**$^1\text{H}$  NMR** (501 MHz,  $\text{CDCl}_3$ )  $\delta$  8.33 (bs, 1H), 7.50 (d,  $J = 8.5$  Hz, 1H), 7.32 (d,  $J = 1.8$  Hz, 1H), 7.06 (dd,  $J = 8.4, 1.8$  Hz, 1H), 6.98–6.87 (m, 1H), 3.62 (s, 3H), 3.19 (s, 3H), 2.78 (t,  $J = 7.4$  Hz, 2H), 2.51 (t,  $J = 7.5$  Hz, 2H), 2.04 (p,  $J = 7.6$  Hz, 2H).

**$^{13}\text{C}$  NMR** (126 MHz,  $\text{CDCl}_3$ )  $\delta$  174.7, 136.8, 127.8, 126.3, 122.2, 119.9, 119.9, 116.2, 111.1, 61.3, 32.4, 31.6, 25.0, 24.7.

**HRMS** (EI) ( $m/z$ ): calculated for  $\text{C}_{14}\text{H}_{17}\text{N}_2\text{O}_2\text{Cl}_1$  [ $\text{M}$ ] $^+$ : 280.0973; found 280.0978.

4-(6-fluoro-1*H*-indol-3-yl)-*N*-methoxy-*N*-methylbutanamide

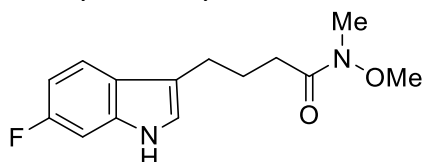

**$^1\text{H}$  NMR** (501 MHz,  $\text{CDCl}_3$ )  $\delta$  8.37 (bs, 1H), 7.50 (dd,  $J = 8.6, 5.3$  Hz, 1H), 7.01 (dd,  $J = 9.7, 2.3$  Hz, 1H), 6.93 (dd,  $J = 2.2, 1.1$  Hz, 1H), 6.86 (ddd,  $J = 9.6, 8.6, 2.3$  Hz, 1H), 3.62 (s, 3H), 3.19 (s, 3H), 2.79 (t,  $J = 8.3$  Hz, 2H), 2.52 (t,  $J = 7.7$  Hz, 2H), 2.05 (p,  $J = 7.2$  Hz, 2H).

**$^{13}\text{C}$  NMR** (126 MHz,  $\text{CDCl}_3$ )  $\delta$  174.4, 160.9, 159.1, 136.3, 124.3, 121.8, 119.6, 116.0, 107.9, 107.7, 97.6, 97.3, 61.3, 32.3, 31.6, 25.0, 24.8.

**HRMS** (EI) ( $m/z$ ): calculated for  $\text{C}_{14}\text{H}_{17}\text{N}_2\text{O}_2\text{F}_1$  [ $\text{M}$ ] $^+$ : 264.1269; found 264.1271.

*N*-methoxy-4-(6-methoxy-1*H*-indol-3-yl)-*N*-methylbutanamide

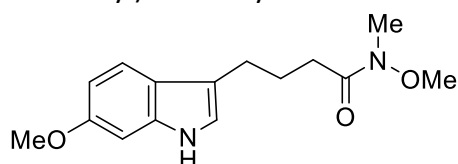

**$^1\text{H}$  NMR** (501 MHz,  $\text{CDCl}_3$ )  $\delta$  7.85 (bs, 1H), 7.48 (d,  $J = 8.6$  Hz, 1H), 6.89 (d,  $J = 1.0$  Hz, 1H), 6.84 (d,  $J = 2.2$  Hz, 1H), 6.78 (dd,  $J = 8.6, 2.2$  Hz, 1H), 3.84 (s, 3H), 3.61 (s, 3H), 3.18 (s, 3H), 2.79 (t,  $J = 7.6$  Hz, 2H), 2.50 (t,  $J = 7.5$  Hz, 2H), 2.05 (p,  $J = 7.6$  Hz, 2H).

**$^{13}\text{C}$  NMR** (126 MHz,  $\text{CDCl}_3$ )  $\delta$  174.9, 156.6, 137.2, 122.2, 120.2, 119.7, 116.0, 109.2, 94.8, 61.3, 55.8, 31.8, 25.0, 24.9.

**HRMS** (EI) ( $m/z$ ): calculated for  $\text{C}_{15}\text{H}_{20}\text{N}_2\text{O}_3$  [ $\text{M}$ ] $^+$ : 276.1468; found 276.1470.

4-(6-(benzyloxy)-1*H*-indol-3-yl)-*N*-methoxy-*N*-methylbutanamide

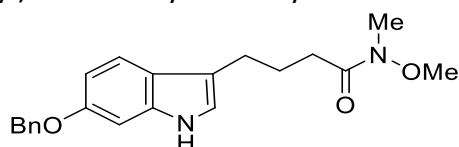

**$^1\text{H}$  NMR** (501 MHz,  $\text{CDCl}_3$ )  $\delta$  7.98 (bs, 1H), 7.52–7.46 (m, 2H), 7.42–7.35 (m, 2H), 7.35–7.29 (m,

1H), 7.24 (d,  $J$  = 8.7 Hz, 1H), 7.16 (d,  $J$  = 2.4 Hz, 1H), 6.97 (d,  $J$  = 2.1 Hz, 1H), 6.93 (dd,  $J$  = 8.7, 2.4 Hz, 1H), 5.12 (s, 2H), 3.61 (s, 3H), 3.19 (s, 3H), 2.78 (t,  $J$  = 7.1 Hz, 2H), 2.52 (t,  $J$  = 7.5 Hz, 2H), 2.06 (p,  $J$  = 7.5 Hz, 2H).

$^{13}\text{C}$  NMR (126 MHz,  $\text{CDCl}_3$ )  $\delta$  174.8, 153.1, 137.9, 131.9, 128.6, 128.1, 127.9, 127.8, 122.4, 115.9, 112.8, 111.8, 102.7, 71.2, 61.3, 31.7, 24.97, 24.8.

HRMS (EI) ( $m/z$ ): calculated for  $\text{C}_{21}\text{H}_{24}\text{N}_2\text{O}_3$   $[\text{M}]^+$ : 352.1781; found 352.1785.

**General synthetic procedure of S-S5:** To a solution of S-S4 in THF was slowly added  $n\text{BuLi}$  (2.3 equiv.) at  $-78^\circ\text{C}$ . After stirring at that temperature for 1.5 h, the solution was slowly warmed up to room temperature and then quenched with cold saturated  $\text{NH}_4\text{Cl}$ . Then the mixture was extracted by DCM for 3 times. The combined organic layers were collected and dried over  $\text{Na}_2\text{SO}_4$ , and concentrated under reduced pressure. The residue was purified by silica column chromatography (hexane:EtOAc = 10:1) to afford product in 90 % to 95 % yield.

1-(4-methyl-1H-indol-3-yl)octan-4-one

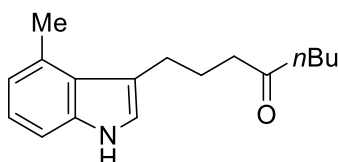

$^1\text{H}$  NMR (501 MHz,  $\text{CDCl}_3$ )  $\delta$  7.93 (bs, 1H), 7.18 (dt,  $J$  = 8.2, 0.8 Hz, 1H), 7.05 (dd,  $J$  = 8.1, 7.1 Hz, 1H), 6.94 (dd,  $J$  = 2.3, 1.1 Hz, 1H), 6.83 (dt,  $J$  = 7.1, 1.0 Hz, 1H), 2.92 (t,  $J$  = 7.6 Hz, 2H), 2.70 (s, 3H), 2.52 (t,  $J$  = 7.3 Hz, 2H), 2.40 (t,  $J$  = 7.5 Hz, 2H), 1.98 (p,  $J$  = 7.5 Hz, 2H), 1.63–1.52 (m, 2H), 1.38–1.25 (m, 2H), 0.90 (t,  $J$  = 7.3 Hz, 3H).

$^{13}\text{C}$  NMR (126 MHz,  $\text{CDCl}_3$ )  $\delta$  211.6, 137.0, 131.0, 126.0, 122.1, 121.7, 121.1, 117.0, 109.1, 42.8, 42.5, 26.8, 26.1, 25.5, 22.5, 20.4, 14.0.

HRMS (EI) ( $m/z$ ): calculated for  $\text{C}_{17}\text{H}_{23}\text{N}_1\text{O}_1$   $[\text{M}]^+$ : 257.1774; found 257.1776.

1-(5-methyl-1H-indol-3-yl)octan-4-one

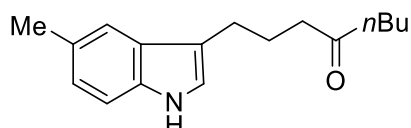

$^1\text{H}$  NMR (501 MHz,  $\text{CDCl}_3$ )  $\delta$  7.89 (bs, 1H), 7.38 (s, 1H), 7.24 (d,  $J$  = 8.2 Hz, 1H), 7.02 (dd,  $J$  = 8.2, 1.6 Hz, 1H), 6.93 (d,  $J$  = 2.3 Hz, 1H), 2.75 (t,  $J$  = 7.5 Hz, 2H), 2.47 (s, 5H), 2.37 (t,  $J$  = 7.5 Hz, 2H), 2.08–1.89 (m, 2H), 1.59–1.49 (m, 2H), 1.36–1.23 (m, 2H), 0.90 (t,  $J$  = 7.4 Hz, 3H).

$^{13}\text{C}$  NMR (126 MHz,  $\text{CDCl}_3$ )  $\delta$  211.8, 134.8, 128.5, 127.8, 123.7, 121.7, 118.7, 115.5, 110.9, 42.7, 42.5, 26.1, 24.6, 24.3, 22.5, 21.6, 14.0.

HRMS (ESI) ( $m/z$ ): calculated for  $\text{C}_{17}\text{H}_{22}\text{N}_1\text{O}_1$   $[\text{M}-\text{H}]^-$ : 256.1707; found 256.1710.

1-(6-methyl-1H-indol-3-yl)octan-4-one

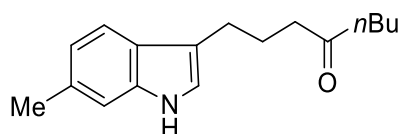

$^1\text{H}$  NMR (501 MHz,  $\text{CDCl}_3$ )  $\delta$  7.84 (bs, 1H), 7.49 (d,  $J$  = 8.0 Hz, 1H), 7.14 (s, 1H), 6.95 (dd,  $J$  = 8.1, 1.4 Hz, 1H), 6.89 (d,  $J$  = 2.2 Hz, 1H), 2.75 (td,  $J$  = 7.5, 0.9 Hz, 2H), 2.47–2.45 (m, 5H), 2.37 (t,  $J$  = 7.5 Hz, 2H), 2.00 (p,  $J$  = 7.3 Hz, 2H), 1.57–1.51 (m, 2H), 1.34–1.25 (m, 2H), 0.90 (t,  $J$  = 7.4 Hz, 3H).

**<sup>13</sup>C NMR** (126 MHz, CDCl<sub>3</sub>) δ 215.9, 137.0, 133.6, 128.9, 126.1, 121.1, 119.5, 118.3, 110.6, 29.7, 26.0, 24.1, 23.2, 22.0, 21.6, 14.0.

**HRMS** (EI) (m/z): calculated for C<sub>17</sub>H<sub>23</sub>N<sub>1</sub>O<sub>1</sub> [M]<sup>+</sup>: 257.1774; found 257.1776.

1-(7-methyl-1*H*-indol-3-yl)octan-4-one

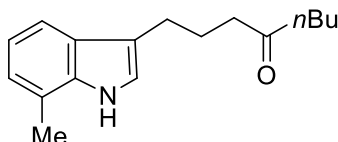

**<sup>1</sup>H NMR** (501 MHz, CDCl<sub>3</sub>) δ 7.87 (bs, 1H), 7.46 (d, *J* = 7.8 Hz, 1H), 7.04 (t, *J* = 7.5 Hz, 1H), 7.01–6.97 (m, 2H), 2.77 (t, *J* = 7.4 Hz, 2H), 2.50–2.43 (m, 5H), 2.36 (t, *J* = 7.5 Hz, 2H), 2.00 (p, *J* = 7.4 Hz, 2H), 1.56–1.47 (m, 2H), 1.32–1.22 (m, 2H), 0.89 (t, *J* = 7.4 Hz, 3H).

**<sup>13</sup>C NMR** (126 MHz, CDCl<sub>3</sub>) δ 211.0, 135.9, 133.9, 128.9, 127.8, 123.2, 119.9, 119.6, 116.4, 29.7, 26.1, 24.2, 23.2, 21.7, 16.9, 14.1.

**HRMS** (EI) (m/z): calculated for C<sub>17</sub>H<sub>25</sub>N<sub>1</sub>O<sub>1</sub> [M]<sup>+</sup>: 257.1774; found 257.1776.

1-(1*H*-benzo[*g*]indol-3-yl)octan-4-one

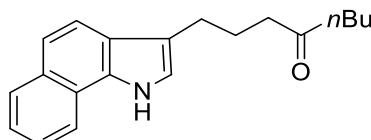

**<sup>1</sup>H NMR** (501 MHz, THF-*d*<sub>8</sub>) δ 10.84 (bs, 1H), 8.13 (d, *J* = 8.2 Hz, 1H), 7.83 (d, *J* = 8.0 Hz, 1H), 7.64 (d, *J* = 8.5 Hz, 1H), 7.46–7.34 (m, 2H), 7.31 (td, *J* = 8.1, 1.2 Hz, 1H), 7.06 (d, *J* = 2.3 Hz, 1H), 2.80 (t, *J* = 7.5 Hz, 2H), 2.45 (t, *J* = 7.2 Hz, 2H), 2.34 (t, *J* = 7.4 Hz, 2H), 1.97 (p, *J* = 7.3 Hz, 2H), 1.50 (p, *J* = 7.5 Hz, 2H), 1.36–1.22 (m, 2H), 0.87 (t, *J* = 7.4 Hz, 3H).

**<sup>13</sup>C NMR** (126 MHz, THF-*d*<sub>8</sub>) δ 209.6, 132.5, 131.6, 129.4, 125.7, 124.5, 124.0, 123.7, 121.1, 121.0, 120.1, 112.0, 117.9, 42.9, 42.7, 30.8, 26.9, 23.4, 14.4.

**HRMS** (ESI) (m/z): calculated for C<sub>20</sub>H<sub>23</sub>N<sub>1</sub>O<sub>1</sub> [M-H]<sup>-</sup>: 290.1914; found 290.1917.

1-(1,6,7,8-tetrahydrocyclopenta[*g*]indol-3-yl)octan-4-one

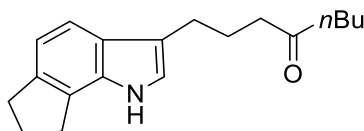

**<sup>1</sup>H NMR** (501 MHz, C<sub>6</sub>D<sub>6</sub>) δ 7.58 (d, *J* = 8.0 Hz, 1H), 7.17 (d, *J* = 8.0 Hz, 1H), 6.76 (s, 1H), 6.52 (d, *J* = 2.3 Hz, 1H), 2.99 (t, *J* = 7.4 Hz, 2H), 2.77 (t, *J* = 7.2 Hz, 2H), 2.73 (t, *J* = 7.3 Hz, 2H), 2.12 (t, *J* = 6.7 Hz, 2H), 2.07–2.00 (m, 4H), 1.93 (t, *J* = 7.4 Hz, 2H), 1.46 (p, *J* = 7.4 Hz, 2H), 1.14 (p, *J* = 7.4 Hz, 2H), 0.79 (t, *J* = 7.3 Hz, 3H).

**<sup>13</sup>C NMR** (126 MHz, C<sub>6</sub>D<sub>6</sub>) δ 209.2, 138.3, 134.1, 127.1, 125.4, 120.7, 117.6, 116.6, 42.4, 42.2, 33.5, 30.1, 26.2, 25.9, 25.2, 24.81, 22.7, 14.1.

**HRMS** (EI) (m/z): calculated for C<sub>19</sub>H<sub>25</sub>N<sub>1</sub>O<sub>1</sub> [M]<sup>+</sup>: 283.1930; found 283.1932.

1-(6-bromo-1*H*-indol-3-yl)octan-4-one

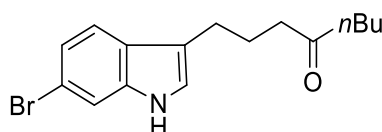

**<sup>1</sup>H NMR** (501 MHz, CDCl<sub>3</sub>) δ 7.97 (bs, 1H), 7.50 (d, *J* = 1.6 Hz, 1H), 7.45 (d, *J* = 8.4 Hz, 1H), 7.20 (dd, *J* = 8.4, 1.7 Hz, 1H), 6.95 (d, *J* = 2.1 Hz, 1H), 2.73 (t, *J* = 7.6 Hz, 2H), 2.46 (t, *J* = 7.3 Hz, 2H),

2.37 (t,  $J = 7.5$  Hz, 2H), 1.97 (p,  $J = 7.4$  Hz, 2H), 1.57–1.47 (m, 2H), 1.35–1.21 (m, 2H), 0.89 (t,  $J = 7.4$  Hz, 3H).

**$^{13}\text{C}$  NMR** (126 MHz,  $\text{CDCl}_3$ )  $\delta$  211.5, 137.3, 126.6, 122.7, 122.0, 120.3, 116.4, 115.7, 114.1, 42.8, 42.3, 26.1, 24.5, 24.2, 22.5, 14.0.

**HRMS** (EI) ( $m/z$ ): calculated for  $\text{C}_{16}\text{H}_{20}\text{N}_1\text{O}_1\text{Br}_1$  [ $M$ ] $^+$ : 321.0723; found 321.0723.

1-(6-chloro-1*H*-indol-3-yl)octan-4-one

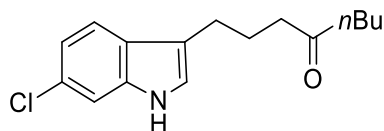

**$^1\text{H}$  NMR** (501 MHz,  $\text{C}_6\text{D}_6$ )  $\delta$  7.37 (d,  $J = 8.4$  Hz, 1H), 7.18 (dd,  $J = 8.4, 1.8$  Hz, 1H), 7.11 (d,  $J = 1.8$  Hz, 1H), 6.68 (bs, 1H), 6.38 (d,  $J = 2.3$  Hz, 1H), 2.57 (t,  $J = 7.5$  Hz, 2H), 2.03 (t,  $J = 7.1$  Hz, 2H), 1.94–1.87 (m, 4H), 1.45 (p,  $J = 7.4$  Hz, 2H), 1.14 (p,  $J = 7.5$  Hz, 2H), 0.80 (t,  $J = 7.4$  Hz, 3H).

**$^{13}\text{C}$  NMR** (126 MHz,  $\text{C}_6\text{D}_6$ )  $\delta$  209.1, 137.1, 126.7, 122.2, 120.2, 116.2, 111.4, 42.4, 42.0, 26.2, 24.6, 24.5, 22.7, 14.1.

**HRMS** (EI) ( $m/z$ ): calculated for  $\text{C}_{16}\text{H}_{20}\text{N}_1\text{O}_1\text{Cl}_1$  [ $M$ ] $^+$ : 277.1228; found 277.1229.

1-(6-fluoro-1*H*-indol-3-yl)octan-4-one

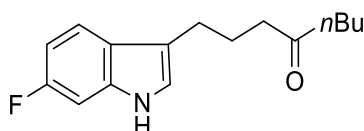

**$^1\text{H}$  NMR** (501 MHz,  $\text{C}_6\text{D}_6$ )  $\delta$  7.40 (dd,  $J = 8.7, 5.4$  Hz, 1H), 6.95 (ddd,  $J = 9.6, 8.6, 2.3$  Hz, 1H), 6.81 (dd,  $J = 9.7, 2.3$  Hz, 1H), 6.76 (bs, 1H), 6.42 (dd,  $J = 2.2, 1.1$  Hz, 1H), 2.61 (t,  $J = 7.4$  Hz, 2H), 2.05 (t,  $J = 7.1$  Hz, 2H), 1.98–1.84 (m, 4H), 1.46 (p,  $J = 8.9$  Hz, 2H), 1.21–1.08 (m, 2H), 0.80 (t,  $J = 7.4$  Hz, 3H).

**$^{13}\text{C}$  NMR** (126 MHz,  $\text{C}_6\text{D}_6$ )  $\delta$  209.2, 161.6, 159.7, 136.8, 124.7, 121.8, 120.1, 120.0, 116.1, 108.3, 108.1, 97.8, 97.6, 42.4, 42.0, 26.2, 24.8, 24.5, 22.7, 14.1.

**$^{19}\text{F}$  NMR** (471 MHz,  $\text{C}_6\text{D}_6$ )  $\delta$  -121.66 (q,  $J = 4.6, 4.0$  Hz).

**HRMS** (EI) ( $m/z$ ): calculated for  $\text{C}_{16}\text{H}_{20}\text{N}_1\text{O}_1\text{F}_1$  [ $M$ ] $^+$ : 261.1523; found 261.1525.

1-(6-methoxy-1*H*-indol-3-yl)octan-4-one

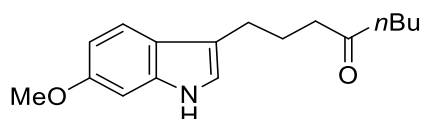

**$^1\text{H}$  NMR** (501 MHz,  $\text{CDCl}_3$ )  $\delta$  7.84 (bs, 1H), 7.46 (d,  $J = 8.7$  Hz, 1H), 6.88–6.82 (m, 2H), 6.78 (dd,  $J = 8.6, 2.3$  Hz, 1H), 3.84 (s, 3H), 2.73 (t,  $J = 7.4$  Hz, 2H), 2.46 (t,  $J = 7.3$  Hz, 2H), 2.36 (t,  $J = 7.5$  Hz, 2H), 1.98 (p,  $J = 7.4$  Hz, 2H), 1.57–1.47 (m, 2H), 1.36–1.22 (m, 2H), 0.88 (t,  $J = 7.2$  Hz, 3H).

**$^{13}\text{C}$  NMR** (126 MHz,  $\text{CDCl}_3$ )  $\delta$  211.6, 156.9, 137.4, 133.3, 128.8, 122.8, 119.2, 113.3, 108.7, 94.8, 55.9, 29.6, 26.0, 24.1, 23.3, 21.6, 14.0.

**HRMS** (EI) ( $m/z$ ): calculated for  $\text{C}_{17}\text{H}_{23}\text{N}_1\text{O}_2$  [ $M$ ] $^+$ : 273.1723; found 273.1725.

1-(6-(benzyloxy)-1*H*-indol-3-yl)octan-4-one

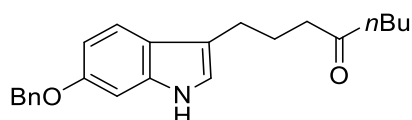

**$^1\text{H}$  NMR** (501 MHz,  $\text{CDCl}_3$ )  $\delta$  7.91 (bs, 1H), 7.52 (d,  $J = 7.8$  Hz, 2H), 7.44–7.39 (m, 2H), 7.37–7.31

(m, 1H), 7.28 (d,  $J = 2.3$  Hz, 1H), 7.16 (d,  $J = 2.4$  Hz, 1H), 6.99–6.94 (m, 2H), 5.14 (s, 2H), 2.75 (t,  $J = 7.3$  Hz, 2H), 2.49 (t,  $J = 7.3$  Hz, 2H), 2.39 (t,  $J = 7.5$  Hz, 2H), 2.00 (p,  $J = 7.4$  Hz, 2H), 1.56 (p,  $J = 7.5$  Hz, 2H), 1.38–1.27 (m, 2H), 0.92 (t,  $J = 7.4$  Hz, 3H).

**$^{13}\text{C}$  NMR** (126 MHz,  $\text{CDCl}_3$ )  $\delta$  211.7, 153.2, 137.9, 131.9, 128.6, 128.0, 127.8, 127.7, 122.4, 120.2, 115.8, 112.9, 111.9, 111.2, 102.7, 71.2, 42.7, 42.4, 26.1, 24.7, 24.2, 22.5, 14.0.

**HRMS** (ESI) ( $m/z$ ): calculated for  $\text{C}_{23}\text{H}_{28}\text{N}_1\text{O}_2$   $[\text{M}+\text{H}]^+$ : 350.2115; found 350.2118.

**General synthetic procedure of 1i-1s:** To a solution of 1M *t*BuOK in THF (3.0 equiv.) was added methyltriphenylphosphonium bromide (1.5 equiv.) at 0 °C and then the suspension was stirred at room temperature for 30 min. To the mixture was slowly added the solution of **S-S5** (1 equiv.) in THF at room temperature and then stirred for 15 h. Then the reaction mixture was quenched with saturated  $\text{NH}_4\text{Cl}$  and extracted with DCM for 3 times. The combined organic layers were collected and dried over  $\text{Na}_2\text{SO}_4$ , and concentrated under reduced pressure. The residue was purified by silica column chromatography (hexane:EtOAc = 10:1 to 5:1) to afford product in 85 % to 95 % yield.

#### 4-methyl-3-(4-methyleneoctyl)-1*H*-indole (**1i**)

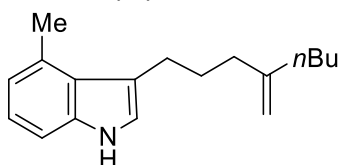

**$^1\text{H}$  NMR** (501 MHz,  $\text{CDCl}_3$ )  $\delta$  7.86 (bs, 1H), 7.19 (d,  $J = 8.0$  Hz, 1H), 7.08 (t,  $J = 7.6$  Hz, 1H), 6.95 (d,  $J = 2.5$  Hz, 1H), 6.87 (d,  $J = 7.0$  Hz, 1H), 4.80 (d,  $J = 5.0$  Hz, 2H), 2.95 (t,  $J = 7.8$  Hz, 2H), 2.74 (s, 3H), 2.20 (t,  $J = 7.7$  Hz, 2H), 2.08 (t,  $J = 7.7$  Hz, 2H), 1.95–1.78 (m, 2H), 1.48–1.43 (m, 2H), 1.41–1.30 (m, 2H), 0.95 (t,  $J = 7.3$  Hz, 3H).

**$^{13}\text{C}$  NMR** (126 MHz,  $\text{CDCl}_3$ )  $\delta$  150.2, 136.9, 131.1, 126.1, 122.0, 121.4, 121.0, 118.0, 109.1, 108.9, 36.1, 36.0, 30.2, 29.7, 27.2, 22.7, 20.4, 14.2.

**HRMS** (ESI) ( $m/z$ ): calculated for  $\text{C}_{18}\text{H}_{25}\text{N}_1$   $[\text{M}-\text{H}]^-$ : 254.1914; found 254.1917.

#### 5-methyl-3-(4-methyleneoctyl)-1*H*-indole (**1j**)

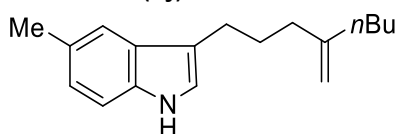

**$^1\text{H}$  NMR** (501 MHz,  $\text{CDCl}_3$ )  $\delta$  7.66 (bs, 1H), 7.30 (s, 1H), 7.13 (d,  $J = 8.4$  Hz, 1H), 6.92 (d,  $J = 8.2$  Hz, 1H), 6.83 (d,  $J = 2.3$  Hz, 1H), 4.66 (s, 2H), 2.64 (t,  $J = 7.6$  Hz, 2H), 2.38 (s, 3H), 2.04 (t,  $J = 7.7$  Hz, 2H), 1.95 (t,  $J = 7.7$  Hz, 2H), 1.79–1.74 (m, 2H), 1.36–1.30 (m, 2H), 1.27–1.21 (m, 2H), 0.82 (t,  $J = 7.3$  Hz, 3H).

**$^{13}\text{C}$  NMR** (126 MHz,  $\text{CDCl}_3$ )  $\delta$  150.2, 134.8, 128.4, 128.0, 123.6, 121.4, 118.8, 116.5, 110.8, 108.8, 36.1, 36.0, 30.2, 28.3, 25.0, 22.7, 21.7, 14.2.

**HRMS** (ESI) ( $m/z$ ): calculated for  $\text{C}_{18}\text{H}_{25}\text{N}_1$   $[\text{M}-\text{H}]^-$ : 254.1914; found 254.1917.

#### 6-methyl-3-(4-methyleneoctyl)-1*H*-indole (**1k**)

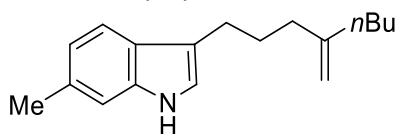

**$^1\text{H}$  NMR** (501 MHz,  $\text{CDCl}_3$ )  $\delta$  7.73 (bs, 1H), 7.53 (d,  $J = 8.0$  Hz, 1H), 7.15 (s, 1H), 6.98 (dd,  $J = 8.0$ ,

1.4 Hz, 1H), 6.91 (d,  $J = 2.0$  Hz, 1H), 4.78 (s, 2H), 2.77 (t,  $J = 7.7$  Hz, 2H), 2.50 (s, 3H), 2.16 (t,  $J = 7.7$  Hz, 2H), 2.07 (t,  $J = 7.7$  Hz, 2H), 1.91–1.86 (m, 2H), 1.50–1.40 (m, 2H), 1.40–1.28 (m, 2H), 0.94 (t,  $J = 7.3$  Hz, 3H).

**$^{13}\text{C}$  NMR** (126 MHz,  $\text{CDCl}_3$ )  $\delta$  150.2, 137.0, 131.7, 125.6, 121.0, 120.6, 118.8, 116.8, 111.1, 108.8, 36.1, 36.0, 30.2, 28.4, 25.1, 22.7, 21.8, 14.2.

**HRMS** (ESI) ( $m/z$ ): calculated for  $\text{C}_{18}\text{H}_{25}\text{N}_1$   $[\text{M}-\text{H}]^-$ : 254.1914; found 254.1917.

7-methyl-3-(4-methyleneoctyl)-1*H*-indole (**1l**)

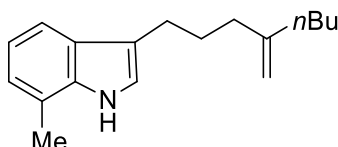

**$^1\text{H}$  NMR** (501 MHz,  $\text{CDCl}_3$ )  $\delta$  7.82 (bs, 1H), 7.50 (d,  $J = 7.7$  Hz, 1H), 7.08 (t,  $J = 7.5$  Hz, 1H), 7.05–6.99 (m, 2H), 4.78 (s, 2H), 2.79 (t,  $J = 7.5$  Hz, 2H), 2.50 (s, 3H), 2.16 (t,  $J = 7.7$  Hz, 2H), 2.07 (t,  $J = 7.5$  Hz, 2H), 1.92–1.86 (m, 2H), 1.47–1.42 (m, 2H), 1.38–1.31 (m, 2H), 0.94 (t,  $J = 7.3$  Hz, 3H).

**$^{13}\text{C}$  NMR** (126 MHz,  $\text{CDCl}_3$ )  $\delta$  150.1, 136.0, 127.2, 122.4, 120.8, 120.2, 119.4, 117.4, 116.8, 108.7, 36.0, 35.9, 30.1, 28.3, 25.1, 22.6, 16.6, 14.1.

**HRMS** (ESI) ( $m/z$ ): calculated for  $\text{C}_{18}\text{H}_{25}\text{N}_1$   $[\text{M}-\text{H}]^-$ : 254.1914; found 254.1917.

3-(4-methyleneoctyl)-1*H*-benzo[*g*]indole (**1m**)

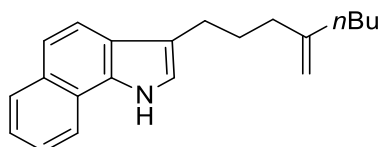

**$^1\text{H}$  NMR** (501 MHz,  $\text{CDCl}_3$ )  $\delta$  8.61 (bs, 1H), 7.95 (dd,  $J = 11.5, 8.0$  Hz, 2H), 7.72 (d,  $J = 8.7$  Hz, 1H), 7.52 (t,  $J = 8.1$  Hz, 2H), 7.43 (t,  $J = 8.3$  Hz, 1H), 7.05 (s, 1H), 4.77 (s, 2H), 2.85 (t,  $J = 7.7$  Hz, 2H), 2.17 (t,  $J = 7.7$  Hz, 2H), 2.06 (t,  $J = 7.6$  Hz, 2H), 2.00–1.82 (m, 2H), 1.46–1.40 (m, 2H), 1.38–1.24 (m, 2H), 0.92 (t,  $J = 7.3$  Hz, 3H).

**$^{13}\text{C}$  NMR** (126 MHz,  $\text{CDCl}_3$ )  $\delta$  150.1, 130.9, 130.6, 129.0, 125.5, 123.9, 123.5, 122.0, 120.1, 119.5, 119.3, 118.8, 108.9, 36.1, 36.0, 30.2, 28.8, 25.1, 22.7, 14.2.

**HRMS** (ESI) ( $m/z$ ): calculated for  $\text{C}_{21}\text{H}_{25}\text{N}_1$   $[\text{M}-\text{H}]^-$ : 290.1914; found 290.1917.

3-(4-methyleneoctyl)-1,6,7,8-tetrahydrocyclopenta[*g*]indole (**1n**)

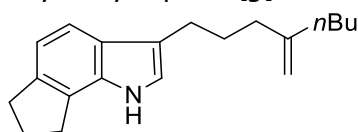

**$^1\text{H}$  NMR** (501 MHz,  $\text{CDCl}_3$ )  $\delta$  7.70 (bs, 1H), 7.45 (d,  $J = 8.0$  Hz, 1H), 7.07 (d,  $J = 8.0$  Hz, 1H), 6.93 (d,  $J = 2.2$  Hz, 1H), 4.76 (s, 2H), 3.06 (dt,  $J = 15.5, 7.4$  Hz, 4H), 2.78 (t,  $J = 7.6$  Hz, 2H), 2.25–2.21 (m, 2H), 2.15 (t,  $J = 7.7$  Hz, 2H), 2.05 (t,  $J = 7.7$  Hz, 2H), 1.90–1.85 (m, 2H), 1.44 (tt,  $J = 7.6, 5.8$  Hz, 2H), 1.37–1.29 (m, 2H), 0.93 (t,  $J = 7.3$  Hz, 3H).

**$^{13}\text{C}$  NMR** (126 MHz,  $\text{CDCl}_3$ )  $\delta$  150.2, 138.5, 133.7, 126.4, 125.5, 120.4, 117.6, 117.2, 116.2, 108.8, 36.1, 36.0, 33.2, 30.2, 29.9, 28.4, 25.6, 25.3, 22.7, 14.2.

**HRMS** (ESI) ( $m/z$ ): calculated for  $\text{C}_{20}\text{H}_{27}\text{N}_1$   $[\text{M}-\text{H}]^-$ : 281.2138; found 281.2139.

6-bromo-3-(4-methyleneoctyl)-1*H*-indole (**1o**)

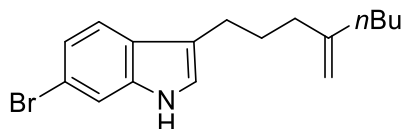

**<sup>1</sup>H NMR** (501 MHz, CDCl<sub>3</sub>) δ 7.87 (bs, 1H), 7.49 (d, *J* = 1.7 Hz, 1H), 7.47 (d, *J* = 8.4 Hz, 1H), 7.22 (dd, *J* = 8.4, 1.7 Hz, 1H), 6.95 (dd, *J* = 2.3, 1.0 Hz, 1H), 4.75 (s, 2H), 2.73 (t, *J* = 7.6 Hz, 2H), 2.12 (t, *J* = 7.6 Hz, 2H), 2.04 (t, *J* = 7.6 Hz, 2H), 1.84 (p, *J* = 7.7 Hz, 2H), 1.47–1.38 (m, 2H), 1.37–1.25 (m, 2H), 0.92 (t, *J* = 7.2 Hz, 3H).

**<sup>13</sup>C NMR** (126 MHz, CDCl<sub>3</sub>) δ 150.0, 137.2, 126.7, 122.5, 121.8, 120.4, 117.2, 115.6, 114.1, 108.9, 36.0, 36.0, 30.2, 28.3, 24.8, 22.6, 14.2.

**HRMS** (EI) (*m/z*): calculated for C<sub>17</sub>H<sub>22</sub>NBr [M]<sup>+</sup>: 319.0928; found 319.0930.

6-chloro-3-(4-methyleneoctyl)-1*H*-indole (**1p**)

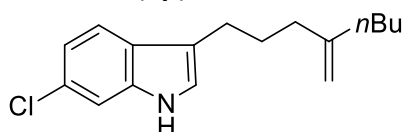

**<sup>1</sup>H NMR** (501 MHz, CDCl<sub>3</sub>) δ 7.89 (bs, 1H), 7.51 (d, *J* = 8.4 Hz, 1H), 7.33 (d, *J* = 1.8 Hz, 1H), 7.09 (dd, *J* = 8.5, 1.8 Hz, 1H), 6.97 (d, *J* = 2.1 Hz, 1H), 4.75 (s, 2H), 2.74 (t, *J* = 7.8 Hz, 2H), 2.12 (t, *J* = 7.6 Hz, 2H), 2.04 (t, *J* = 7.6 Hz, 2H), 1.89–1.79 (m, 2H), 1.48–1.37 (m, 2H), 1.35–1.29 (m, 2H), 0.92 (t, *J* = 7.3 Hz, 3H).

**<sup>13</sup>C NMR** (126 MHz, CDCl<sub>3</sub>) δ 150.0, 136.8, 127.9, 126.4, 121.9, 120.0, 120.0, 117.2, 111.1, 109.0, 36.0, 35.9, 30.2, 28.3, 24.8, 22.6, 14.2.

**HRMS** (ESI) (*m/z*): calculated for C<sub>17</sub>H<sub>22</sub>NCl [M-H]<sup>-</sup>: 274.1373; found 274.1368.

6-fluoro-3-(4-methyleneoctyl)-1*H*-indole (**1q**)

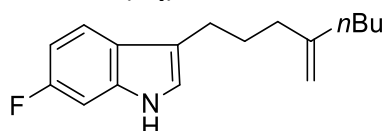

**<sup>1</sup>H NMR** (501 MHz, CDCl<sub>3</sub>) δ 7.89 (bs, 1H), 7.50 (dd, *J* = 8.7, 5.3 Hz, 1H), 7.03 (dd, *J* = 9.7, 2.3 Hz, 1H), 6.95 (dq, *J* = 2.9, 1.9, 1.5 Hz, 1H), 6.90–6.84 (m, 1H), 4.74 (t, *J* = 1.1 Hz, 2H), 2.73 (td, *J* = 7.6, 1.0 Hz, 2H), 2.12 (t, *J* = 7.6 Hz, 2H), 2.03 (t, *J* = 7.6 Hz, 2H), 1.89–1.77 (m, 2H), 1.45–1.36 (m, 2H), 1.36–1.23 (m, 2H), 0.90 (t, *J* = 7.3 Hz, 3H).

**<sup>13</sup>C NMR** (126 MHz, CDCl<sub>3</sub>) δ 161.1, 159.2, 150.0, 124.4, 121.4, 119.8, 119.7, 117.1, 108.9, 108.0, 107.8, 97.5, 97.3, 36.0, 36.0, 30.2, 28.3, 24.9, 22.7, 14.2.

**<sup>19</sup>F NMR** (471 MHz, CDCl<sub>3</sub>) δ -121.61 – -121.70 (m).

**HRMS** (ESI) (*m/z*): calculated for C<sub>18</sub>H<sub>25</sub>N<sub>1</sub>O<sub>1</sub> [M-H]<sup>-</sup>: 270.1863; found 270.1867.

6-methoxy-3-(4-methyleneoctyl)-1*H*-indole (**1r**)

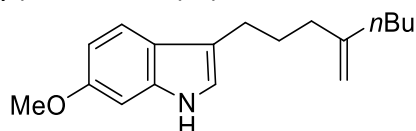

**<sup>1</sup>H NMR** (501 MHz, CDCl<sub>3</sub>) δ 7.77 (bs, 1H), 7.48 (d, *J* = 8.6 Hz, 1H), 6.89–6.83 (m, 2H), 6.80 (dd, *J* = 8.6, 2.3 Hz, 1H), 4.75 (s, 2H), 3.85 (s, 3H), 2.73 (t, *J* = 7.7 Hz, 2H), 2.13 (t, *J* = 7.7 Hz, 2H), 2.04 (t, *J* = 7.6 Hz, 2H), 1.88–1.82 (m, 2H), 1.47–1.37 (m, 2H), 1.36–1.25 (m, 2H), 0.92 (t, *J* = 7.3 Hz, 3H).

**<sup>13</sup>C NMR** (126 MHz, CDCl<sub>3</sub>) δ 156.6, 150.2, 137.2, 122.2, 112.0, 119.7, 117.0, 109.2, 108.8, 94.8,

55.9, 36.1, 36.0, 30.2, 28.4, 25.1, 22.7, 14.2.

**HRMS** (ESI) ( $m/z$ ): calculated for  $C_{18}H_{25}N_1O_1$   $[M-H]^-$ : 270.1863; found 270.1867.

6-(benzyloxy)-3-(4-methyleneoctyl)-1*H*-indole (**1s**)

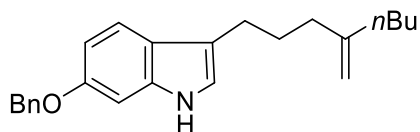

**$^1H$  NMR** (501 MHz,  $CDCl_3$ )  $\delta$  7.69 (bs, 1H), 7.40 (d,  $J$  = 8.1 Hz, 2H), 7.30 (t,  $J$  = 7.2 Hz, 2H), 7.23 (t,  $J$  = 8.1 Hz, 1H), 7.13 (d,  $J$  = 8.8 Hz, 1H), 7.05 (s, 1H), 6.84 (dt,  $J$  = 4.7, 2.8 Hz, 2H), 5.03 (s, 2H), 4.66 (s, 2H), 2.62 (t,  $J$  = 7.7 Hz, 2H), 2.03 (t,  $J$  = 7.7 Hz, 2H), 1.95 (t,  $J$  = 7.7 Hz, 2H), 1.82–1.66 (m, 2H), 1.35–1.31 (m, 2H), 1.26–1.18 (m, 2H), 0.82 (t,  $J$  = 7.2 Hz, 3H).

**$^{13}C$  NMR** (126 MHz,  $CDCl_3$ )  $\delta$  153.1, 150.1, 137.9, 131.9, 128.6, 128.1, 127.9, 127.8, 122.2, 116.7, 112.8, 111.8, 108.8, 102.9, 71.2, 36.1, 36.0, 30.2, 28.2, 25.0, 22.7, 14.2.

**HRMS** (EI) ( $m/z$ ): calculated for  $C_{24}H_{29}N_1O_1$   $[M]^+$ : 347.2243; found 347.2244.

Route C

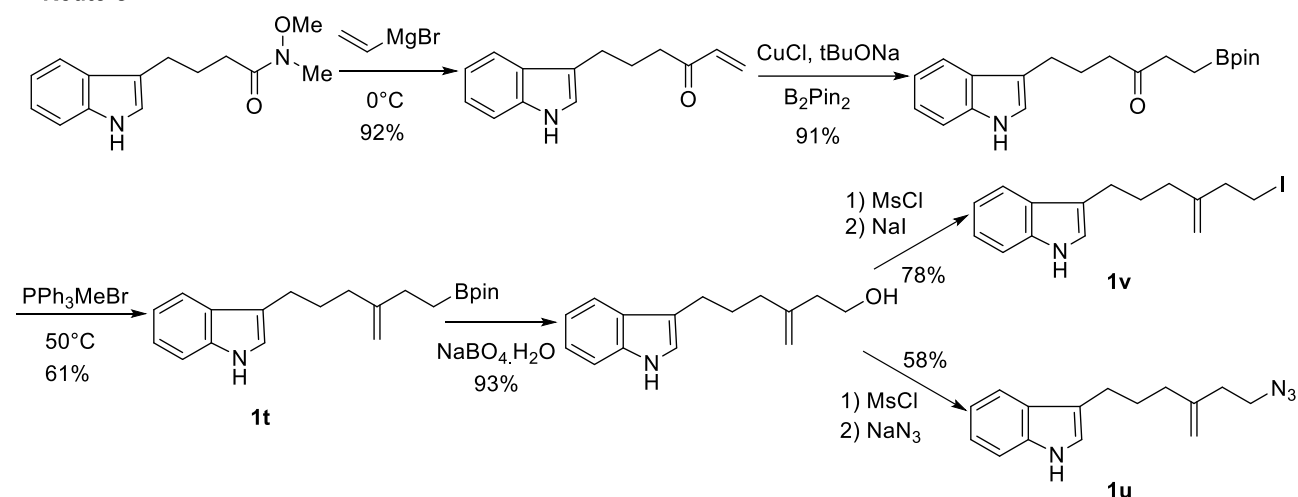

**Scheme S9:** Substrates synthesis of **1t-1v**

6-(1*H*-indol-3-yl)hex-1-en-3-one

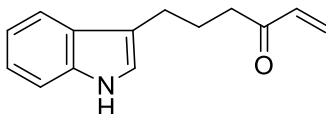

To a solution of 4-(1*H*-indol-3-yl)-*N*-methoxy-*N*-methylbutanamide (1.5 g, 6.09 mmol) in THF (15 mL), vinylmagnesium bromide solution (2 M, 7 mL, 2.3 equiv.) was slowly added at 0 °C. After stirring at that temperature for 1.5 h, the solution was slowly warmed up to room temperature and then quenched with cold saturated  $NH_4Cl$ . Then the mixture was extracted by EtOAc for 3 times. The combined organic layers were collected and dried over  $Na_2SO_4$ , and concentrated under reduced pressure. The residue was purified by silica column chromatography (hexane:EtOAc = 5:1) to afford product 1.2 g in 92% yield.

**$^1H$  NMR** (501 MHz,  $CDCl_3$ )  $\delta$  8.08 (bs, 1H), 7.63 (d,  $J$  = 7.9 Hz, 1H), 7.35 (dt,  $J$  = 8.1, 0.9 Hz, 1H), 7.20 (dt,  $J$  = 6.9, 1.2 Hz, 1H), 7.13 (dt,  $J$  = 7.1, 1.1 Hz, 1H), 6.97 (dd,  $J$  = 2.3, 1.1 Hz, 1H), 6.35 (dd,  $J$  = 17.7, 10.6 Hz, 1H), 6.19 (dd,  $J$  = 17.7, 1.1 Hz, 1H), 5.80 (dd,  $J$  = 10.6, 1.1 Hz, 1H), 2.82 (t,  $J$  = 7.4 Hz, 2H), 2.67 (t,  $J$  = 7.3 Hz, 2H), 2.13–2.00 (m, 2H).

**<sup>13</sup>C NMR** (126 MHz, CDCl<sub>3</sub>) δ 201.2, 136.6, 136.5, 128.1, 127.6, 122.0, 121.6, 119.3, 119.0, 115.8, 111.2, 39.3, 24.6, 24.4.

**HRMS** (ESI) (m/z): calculated for C<sub>14</sub>H<sub>14</sub>N<sub>1</sub>O<sub>1</sub>Na<sub>1</sub> [M-H]<sup>-</sup>: 212.1081; found 212.1083.

6-(1*H*-indol-3-yl)-1-(4,4,5,5-tetramethyl-1,3,2-dioxaborolan-2-yl)hexan-3-one

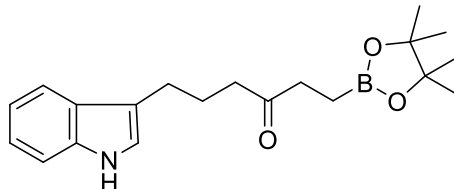

A mixture of copper(I) chloride (65 mg, 0.66 mmol, 20 mol%) and *t*BuONa (63 mg, 0.66 mmol, 20 mol%) in THF (10 mL) was stirred at r.t. for 10 min, then bis(pinacolato)diboron (875 mg, 3.45 mmol, 1.05 equiv.) was added and the resulting black solution was stirred for 10 min before addition of 6-(1*H*-indol-3-yl)hex-1-en-3-one (700 mg, 3.28 mmol, 1 equiv.) and methanol (1 mL). The mixture was allowed to stir at r.t. for 2 h and quenched with saturated NH<sub>4</sub>Cl. Then the mixture was extracted by EtOAc for 3 times. The combined organic layers were collected and dried over Na<sub>2</sub>SO<sub>4</sub>, and concentrated under reduced pressure. The residue was purified by silica column chromatography (hexane:EtOAc = 3:1) to afford 1 g product in 91% yield.

**<sup>1</sup>H NMR** (501 MHz, C<sub>6</sub>D<sub>6</sub>) δ 7.69 (d, *J* = 7.6 Hz, 1H), 7.27–7.17 (m, 2H), 7.08 (dt, *J* = 8.2, 0.9 Hz, 1H), 6.71 (bs, 1H), 6.48 (dd, *J* = 2.3, 1.0 Hz, 1H), 2.69 (t, *J* = 7.4 Hz, 2H), 2.29 (t, *J* = 6.8 Hz, 2H), 2.07 (t, *J* = 6.8 Hz, 2H), 2.01–1.92 (m, 2H), 1.13 (s, 12H).

**<sup>13</sup>C NMR** (126 MHz, C<sub>6</sub>D<sub>6</sub>) δ 209.9, 136.9, 128.4, 122.2, 121.5, 119.6, 119.5, 116.1, 111.4, 83.0, 41.5, 37.8, 25.0, 24.9, 24.8, 24.7.

**HRMS** (ESI) (m/z): calculated for C<sub>20</sub>H<sub>28</sub>B<sub>1</sub>N<sub>1</sub>O<sub>3</sub>Na<sub>1</sub> [M+Na]<sup>+</sup>: 364.2054; found 364.2053.

3-(4-methylene-6-(4,4,5,5-tetramethyl-1,3,2-dioxaborolan-2-yl)hexyl)-1*H*-indole (**1t**)

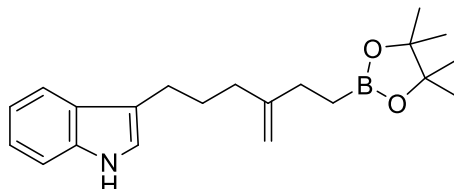

A suspension of *t*BuOK (210 mg, 1.88 mmol, 2 equiv.) and methyltriphenylphosphonium bromide (502 mg, 1.4 mmol, 1.5 equiv.) in THF (10 mL) was stirred at 50 °C for 1h. The solution of 6-(1*H*-indol-3-yl)-1-(4,4,5,5-tetramethyl-1,3,2-dioxaborolan-2-yl)hexan-3-one (320 mg, 0.94 mmol, 1 equiv.) in THF (5 mL) was added into above mentioned mixture and stirred at 50 °C for 24h. Then the reaction mixture was quenched with saturated NH<sub>4</sub>Cl and extracted with EtOAc for 3 times. The combined organic layers were collected and dried over Na<sub>2</sub>SO<sub>4</sub>, and concentrated under reduced pressure. The residue was purified by silica column chromatography (hexane:EtOAc = 3:1) to afford 195 mg product in 61% yield.

**<sup>1</sup>H NMR** (501 MHz, C<sub>6</sub>D<sub>6</sub>) δ 7.68 (d, *J* = 8.0 Hz, 1H), 7.25–7.18 (m, 2H), 7.08 (d, *J* = 8.0 Hz, 1H), 6.70 (bs, 1H), 6.47 (d, *J* = 2.3 Hz, 1H), 4.91 (d, *J* = 4.9 Hz, 2H), 2.74 (t, *J* = 7.8 Hz, 2H), 2.36 (t, *J* = 7.8 Hz, 2H), 2.16 (t, *J* = 7.6 Hz, 2H), 1.89 (dq, *J* = 8.7, 7.6 Hz, 2H), 1.21–1.11 (m, 2H), 1.06 (s, 12H).

**<sup>13</sup>C NMR** (126 MHz, C<sub>6</sub>D<sub>6</sub>) δ 151.7, 136.9, 122.0, 121.2, 119.4, 116.8, 111.3, 108.2, 82.9, 36.7, 30.6, 28.8, 25.3, 25.0.

**HRMS (ESI) (m/z):** calculated for  $C_{21}H_{30}B_1N_1O_2Na_1$   $[M+Na]^+$ : 362.2262; found 362.2261.

6-(1*H*-indol-3-yl)-3-methylenehexan-1-ol

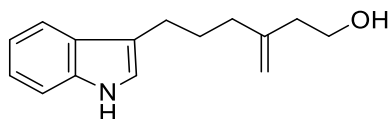

To a solution of the boronate ester **1t** (105 mg, 0.31 mmol, 1 equiv.) in THF/H<sub>2</sub>O (3 mL/3 mL) at room temperature open to air was added NaBO<sub>3</sub>·H<sub>2</sub>O (154 mg, 1.55 mmol, 5 equiv.), and the mixture was stirred for 2 h. Then saturated NH<sub>4</sub>Cl was added and extracted with EtOAc for 3 times. The combined organic layers were collected and dried over Na<sub>2</sub>SO<sub>4</sub>, and concentrated under reduced pressure. The residue was purified by silica column chromatography (hexane:EtOAc = 1:1) to afford 66 mg product in 93% yield.

**<sup>1</sup>H NMR** (501 MHz, C<sub>6</sub>D<sub>6</sub>) δ 7.67 (dt, *J* = 7.6, 1.0 Hz, 1H), 7.28–7.18 (m, 2H), 7.08 (dt, *J* = 8.2, 1.0 Hz, 1H), 6.67 (bs, 1H), 6.47 (d, *J* = 2.3 Hz, 1H), 4.80 (dd, *J* = 28.0, 1.6 Hz, 2H), 3.44 (t, *J* = 6.5 Hz, 2H), 2.71 (t, *J* = 7.5 Hz, 2H), 2.07 (t, *J* = 6.6 Hz, 2H), 1.99 (t, *J* = 7.7 Hz, 2H), 1.90–1.75 (m, 2H).

**<sup>13</sup>C NMR** (126 MHz, C<sub>6</sub>D<sub>6</sub>) δ 146.6, 136.9, 122.2, 121.2, 119.5, 119.4, 116.5, 111.4, 60.8, 39.7, 36.1, 28.7, 25.2.

**HRMS (ESI) (m/z):** calculated for C<sub>15</sub>H<sub>18</sub>N<sub>1</sub>O<sub>1</sub>  $[M-H]^-$ : 228.1394; found 228.1394.

3-(6-azido-4-methylenehexyl)-1*H*-indole (**1u**)

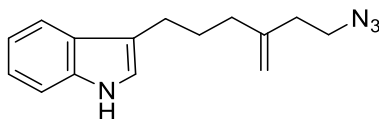

To a mixture of 6-(1*H*-indol-3-yl)-3-methylenehexan-1-ol (144 mg, 0.63 mmol, 1 equiv.) and DMAP (15 mg, 0.126 mmol, 0.2 equiv.) in 5 mL THF were added dropwise MsCl (75 μL, 0.95 mmol, 1.5 equiv.) and Et<sub>3</sub>N (127 μL, 0.95 mmol, 1.5 equiv.) at r.t. The resulting mixture was stirred for 3 h and the reaction was monitored by TLC. After the starting material was all consumed, reaction mixture was quenched with saturated NH<sub>4</sub>Cl and extracted with EtOAc for 3 times. The combined organic layers were collected and dried over Na<sub>2</sub>SO<sub>4</sub>, and concentrated under reduced pressure. The mixture of the above-mentioned crude product and NaN<sub>3</sub> (204 mg, 3.15 mmol, 5 equiv.) in 5 mL DMF was stirred at 80 °C overnight. The reaction mixture was washed with water and extracted with EtOAc for 3 times. The combined organic layers were collected and dried over Na<sub>2</sub>SO<sub>4</sub>, and concentrated under reduced pressure. The residue was purified by silica column chromatography (hexane:EtOAc = 4:1) to afford 93 mg product in 58% yield.

**<sup>1</sup>H NMR** (501 MHz, C<sub>6</sub>D<sub>6</sub>) δ 7.66 (dd, *J* = 7.8, 1.2 Hz, 1H), 7.28 – 7.17 (m, 2H), 7.08 (dt, *J* = 8.3, 0.9 Hz, 2H), 6.62 (bs, 1H), 6.46 (d, *J* = 2.2 Hz, 1H), 4.75 (d, *J* = 52.0 Hz, 2H), 2.79 (t, *J* = 7.2 Hz, 2H), 2.68 (t, *J* = 7.2 Hz, 2H), 2.01–1.84 (m, 4H), 1.79–1.61 (m, 2H).

**<sup>13</sup>C NMR** (126 MHz, C<sub>6</sub>D<sub>6</sub>) δ 145.9, 136.9, 122.2, 121.2, 119.6, 119.3, 116.3, 111.5, 111.4, 49.5, 35.9, 35.2, 28.5, 25.1.

**HRMS (ESI) (m/z):** calculated for C<sub>15</sub>H<sub>17</sub>N<sub>4</sub>  $[M-H]^-$ : 253.1459; found 253.1463.

### 3-(6-iodo-4-methylenehexyl)-1*H*-indole (**1v**)

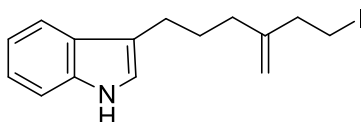

To a mixture of 6-(1*H*-indol-3-yl)-3-methylenehexan-1-ol (33 mg, 0.14 mmol, 1 equiv.) and DMAP (4 mg, 0.03 mmol, 0.2 equiv.) in 3 mL THF were added MsCl (18  $\mu$ L, 0.22 mmol, 1.5 equiv.) and Et<sub>3</sub>N (29  $\mu$ L, 0.22 mmol, 1.5 equiv.) at r.t. The resulting mixture was stirred for 3 h and the reaction was monitored by TLC. After the starting material was all consumed, reaction mixture was quenched with saturated NH<sub>4</sub>Cl and extracted with EtOAc for 3 times. The combined organic layers were collected and dried over Na<sub>2</sub>SO<sub>4</sub>, and concentrated under reduced pressure. The mixture of the above-mentioned crude product and NaI (107 mg, 0.72 mmol, 5 equiv.) in 5 mL acetone was stirred at r.t. overnight. The reaction mixture was washed with water and extracted with EtOAc for 3 times. The combined organic layers were collected and dried over Na<sub>2</sub>SO<sub>4</sub>, and concentrated under reduced pressure. The residue was purified by silica column chromatography (hexane:EtOAc = 5:1) to afford 38 mg product in 78% yield.

**<sup>1</sup>H NMR** (501 MHz, C<sub>6</sub>D<sub>6</sub>)  $\delta$  7.65 (dd,  $J$  = 7.7, 1.3 Hz, 1H), 7.27–7.18 (m, 2H), 7.07 (d,  $J$  = 7.6 Hz, 1H), 6.59 (bs, 1H), 6.43 (d,  $J$  = 2.3 Hz, 1H), 4.71 (dd,  $J$  = 77.2, 1.6 Hz, 2H), 2.80 (t,  $J$  = 7.6 Hz, 2H), 2.65 (t,  $J$  = 7.6 Hz, 2H), 2.27 (td,  $J$  = 7.7, 1.1 Hz, 2H), 1.85 (t,  $J$  = 7.6 Hz, 2H), 1.73–1.68 (m, 2H).  
**<sup>13</sup>C NMR** (126 MHz, C<sub>6</sub>D<sub>6</sub>)  $\delta$  148.0, 136.9, 122.2, 121.2, 119.6, 119.3, 116.3, 111.4, 111.3, 40.6, 35.3, 28.4, 25.1, 3.5.

**HRMS** (ESI) ( $m/z$ ): calculated for C<sub>15</sub>H<sub>19</sub>N<sub>1</sub>I [M+H]<sup>+</sup>: 340.0557; found 340.0557.

#### Route D

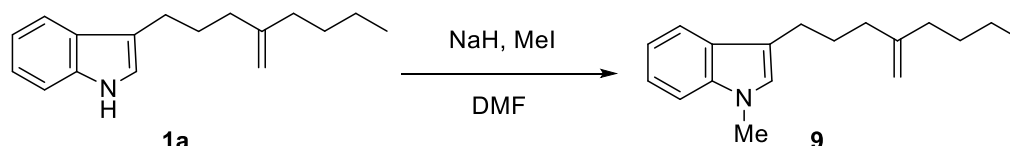

**Scheme S10:** Substrates synthesis of **9**

### 1-methyl-3-(4-methyleneoctyl)-1*H*-indole (**9**)

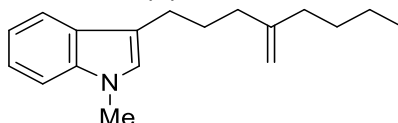

To the solution of **1a** (71.6 mg, 0.30 mmol, 1.0 equiv.) in THF (3 mL) was added NaH (60% dispersion in mineral oil, 24 mg, 0.6 mmol, 2.0 equiv.) at room temperature. After 10 min, to the suspension was added methyl iodide (28  $\mu$ L, 0.45 mmol, 1.5 equiv.) at room temperature and the mixture was stirred for 4.5 h. Then it was quenched with saturated NH<sub>4</sub>Cl and extracted twice with Et<sub>2</sub>O. The combined organic layer was washed with brine, and then dried over Na<sub>2</sub>SO<sub>4</sub>, and concentrated under reduced pressure. The residue was purified by silica column chromatography (hexane:Et<sub>2</sub>O = 20:1) to afford 70 mg product as a yellow oil in 92% yield.

**<sup>1</sup>H NMR** (501 MHz, CDCl<sub>3</sub>)  $\delta$  7.60 (d,  $J$  = 8.5 Hz, 1H), 7.29 (d,  $J$  = 8.2 Hz, 1H), 7.22 (t,  $J$  = 8.0 Hz, 1H), 7.10 (t,  $J$  = 8.3 Hz, 1H), 6.84 (s, 1H), 4.74 (s, 2H), 3.75 (s, 3H), 2.75 (t,  $J$  = 7.7 Hz, 2H), 2.13 (t,  $J$  = 7.7 Hz, 2H), 2.03 (t,  $J$  = 7.6 Hz, 2H), 1.91–1.76 (m, 2H), 1.46–1.36 (m, 2H), 1.36–1.26 (m, 2H), 0.91 (t,  $J$  = 7.3 Hz, 3H).

**$^{13}\text{C}$  NMR** (126 MHz,  $\text{CDCl}_3$ )  $\delta$  150.2, 137.2, 128.1, 126.2, 121.5, 119.2, 118.6, 115.5, 109.2, 108.8, 36.2, 36.0, 32.7, 30.2, 28.6, 25.0, 22.7, 14.2.

**HRMS** (EI) ( $m/z$ ): calculated for  $\text{C}_{18}\text{H}_{25}\text{N}_1$   $[\text{M}]^+$ : 255.1981; found 255.1987.

#### Route E

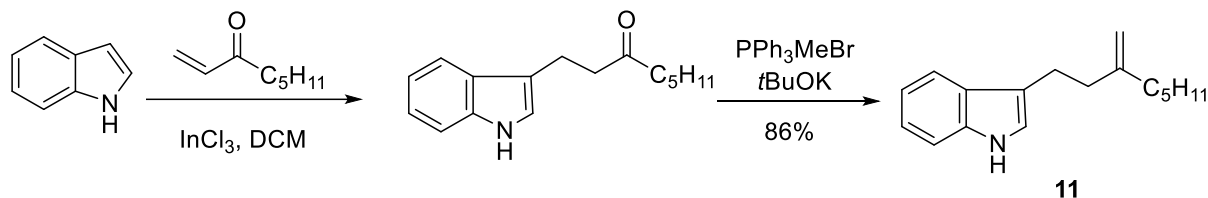

**Scheme S11:** Substrates synthesis of **11**

#### 3-(3-methyleneoctyl)-1H-indole(**11**)

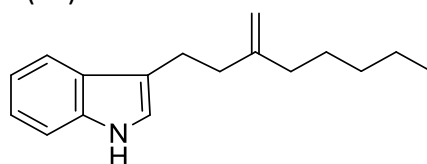

1-(1H-indol-3-yl)octan-3-one was prepared following to the reported procedure for similar compounds.<sup>10</sup> The analytic data was identical to the reported value.<sup>11</sup>

To a solution of  $t\text{BuOK}$  (770 mg, 6.9 mmol, 3.2 equiv.) in THF (10 mL) was added methyltriphenylphosphonium bromide (1.19 g, 3.3 mmol, 1.6 equiv.) at 0 °C and then the suspension was stirred at room temperature for 1 h. To the mixture was slowly added 1-(1H-indol-3-yl)octan-3-one (522 mg, 2.1 mmol, 1.0 equiv.) as a solid at room temperature. After 18 h, the reaction mixture was quenched with saturated  $\text{NH}_4\text{Cl}$  and extracted with  $\text{EtOAc}$  for 3 times. The combined organic layers were collected and dried over  $\text{Na}_2\text{SO}_4$ , and concentrated under reduced pressure. The residue was purified by silica column chromatography using 5-20 %  $\text{Et}_2\text{O}$  in hexane as eluent to afford the desired product as a red oil (444 mg, 86 %).

**$^1\text{H}$  NMR** (501 MHz,  $\text{CDCl}_3$ )  $\delta$  7.84 (bs, 1H), 7.67 (d,  $J$  = 7.6 Hz, 1H), 7.37 (d,  $J$  = 8.0 Hz, 1H), 7.24 (t,  $J$  = 7.5 Hz, 1H), 7.18 (t,  $J$  = 7.7 Hz, 1H), 7.00 (d,  $J$  = 2.2 Hz, 1H), 4.87 (d,  $J$  = 5.6 Hz, 2H), 2.95 (t,  $J$  = 5.5 Hz, 2H), 2.49 (t,  $J$  = 6.2 Hz, 2H), 2.15 (t,  $J$  = 7.6 Hz, 2H), 1.54–1.52 (m, 2H), 1.44–1.28 (m, 4H), 0.96 (t,  $J$  = 9.0 Hz, 3H).

**$^{13}\text{C}$  NMR** (126 MHz,  $\text{CDCl}_3$ )  $\delta$  150.2, 136.4, 127.6, 122.0, 121.1, 119.3, 119.0, 116.8, 111.2, 108.9, 36.6, 36.4, 31.8, 27.7, 23.9, 22.7, 14.2.

**HRMS** (EI) ( $m/z$ ): calculated for  $\text{C}_{17}\text{H}_{22}\text{N}_1$   $[\text{M}-\text{H}]^-$ : 240.1758; found 240.1759.

**Route F**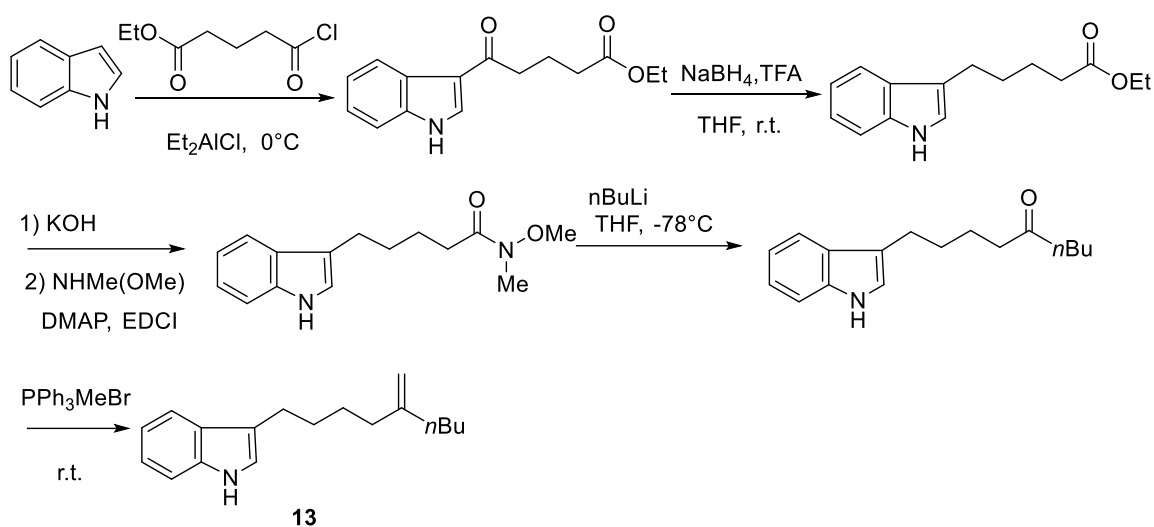**Scheme S12: Substrates synthesis of 13****Ethyl 5-(1*H*-indol-3-yl)-5-oxopentanoate**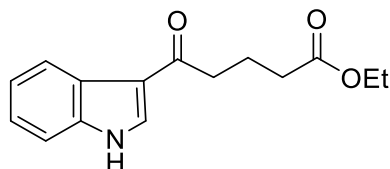

Indole (2 g, 1 equiv.) was dissolved in 30 mL anhydrous dichloromethane and cooled to 0 °C. Diethyl aluminum chloride (1.0 M in hexane) (20 mL, 1.2 equiv.) was then added to the solution, which was stirred for 30 min. Still at 0 °C, ethyl glutaroyl chloride (1.2 equiv.) was then slowly added to the flask, the mixture turned to red and reaction proceeded for 2 hours, gradually warming to room temperature. The reaction mixture was slowly quenched with cold 2M HCl solution, the organics were extracted in EtOAc and washed with Rochelle's salt solution, dried over Na<sub>2</sub>SO<sub>4</sub>, and concentrated under reduced pressure to afford a crude solid. The crude product dissolved in small amount of MeOH and then the precipitation was slowly came out by adding pentane to afford 1.3 g pure product in 40% yield.

**<sup>1</sup>H NMR** (501 MHz, DMSO-*d*<sub>6</sub>) δ 11.91 (s, 1H), 8.29 (d, *J* = 3.1 Hz, 1H), 8.18 (dd, *J* = 7.2, 1.5 Hz, 1H), 7.52 – 7.37 (m, 1H), 7.28 – 7.08 (m, 2H), 4.06 (q, *J* = 7.1 Hz, 2H), 2.88 (t, *J* = 7.3 Hz, 2H), 2.37 (t, *J* = 7.5 Hz, 3H), 1.89 (p, *J* = 7.4 Hz, 2H), 1.17 (t, *J* = 7.1 Hz, 3H).

**<sup>13</sup>C NMR** (126 MHz, DMSO-*d*<sub>6</sub>) δ 194.7, 172.7, 136.6, 133.8, 125.3, 122.7, 121.6, 121.3, 116.2, 112.1, 59.7, 37.7, 33.0, 20.2, 14.1.

**HRMS** (ESI) (*m/z*): calculated for C<sub>15</sub>H<sub>18</sub>N<sub>1</sub>O<sub>3</sub> [*M*+*H*]<sup>+</sup>: 260.1281; found 260.1282.

**Ethyl 5-(1*H*-indol-3-yl)pentanoate**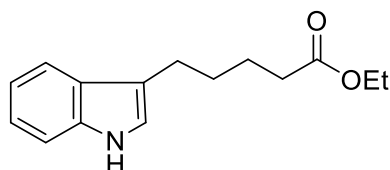

In a two-neck round-bottomed flask fitted with a magnetic stirring bar, NaBH<sub>4</sub> (3 equiv.) was added to a stirred solution of Ethyl 5-(1*H*-indol-3-yl)-5-oxopentanoate (1 equiv.) in THF (20 mL). Trifluoroacetic acid (0.5 equiv.) was then drop wisely added. 30 min later, another 0.5 equiv.

of trifluoroacetic acid was again drop wisely. The reaction was stirred at room temperature and followed on TLC upon full conversion of the starting material (2h). Then the reaction was carefully quenched with cold 1M NaOH solution and extracted with EtOAc for 3 times. The combined organic layer were dried over Na<sub>2</sub>SO<sub>4</sub>, and concentrated under reduced pressure. The residue was purified by silica column chromatography (Hexane:EtOAc = 3:1) to afford product in 60 % yield.

**<sup>1</sup>H NMR** (501 MHz, CDCl<sub>3</sub>) δ 7.94 (s, 1H), 7.60 (d, *J* = 7.9 Hz, 1H), 7.35 (dt, *J* = 8.2, 0.9 Hz, 1H), 7.19 (ddd, *J* = 8.0, 7.0, 1.2 Hz, 1H), 7.12 (ddd, *J* = 8.0, 7.0, 1.0 Hz, 1H), 6.98 (d, *J* = 2.2 Hz, 1H), 4.13 (q, *J* = 7.1 Hz, 2H), 2.79 (t, *J* = 7.3 Hz, 2H), 2.35 (t, *J* = 7.2 Hz, 2H), 1.85–1.65 (m, 4H), 1.25 (t, *J* = 7.1 Hz, 3H).

**<sup>13</sup>C NMR** (126 MHz, CDCl<sub>3</sub>) δ 136.5, 127.6, 122.0, 121.3, 119.2, 119.0, 116.5, 111.2, 60.4, 34.4, 29.7, 25.0, 14.4.

**HRMS** (CI) (*m/z*): calculated for C<sub>15</sub>H<sub>20</sub>N<sub>1</sub>O<sub>2</sub> [M+H]<sup>+</sup>: 246.1489; found 246.1490.

#### 5-(1*H*-indol-3-yl)-*N*-methoxy-*N*-methylpentanamide

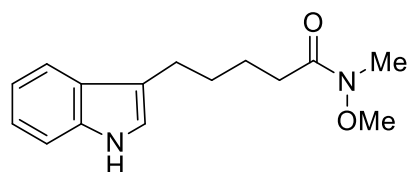

To a solution of Ethyl 5-(1*H*-indol-3-yl)pentanoate (156 mg, 0.636 mmol, 1 equiv.) in MeOH:H<sub>2</sub>O = 1:1 (5 mL:5 mL) was added KOH (107 mg, 2 equiv.), the mixture solution was stirred at 80 °C with a condenser for 2 hours. Then the mixture was extracted by DCM and saturated NH<sub>4</sub>Cl. The organic layer was separated and dried over Na<sub>2</sub>SO<sub>4</sub>, and concentrated under reduced pressure. To a solution of the crude residue in DCM were added *N,O*-dimethylhydroxylamine hydrochloride (74 mg, 0.763 mmol, 1.2 equiv.), DMAP (93 mg, 0.763 mmol, 1.2 equiv.) and EDCI (146 mg, 0.763 mmol, 1.2 equiv.) sequentially at room temperature. The mixture was stirred for 4 h then worked up by addition of water, followed by extraction with DCM and washed by saturated NH<sub>4</sub>Cl. The combined organic layers were collected and dried over Na<sub>2</sub>SO<sub>4</sub>, and concentrated under reduced pressure. The residue was purified by silica column chromatography (hexane:EtOAc = 1:2) to afford 158 mg product in 96 % yield.

**<sup>1</sup>H NMR** (501 MHz, CDCl<sub>3</sub>) δ 8.04 (bs, 1H), 7.61 (dd, *J* = 7.9, 1.0 Hz, 1H), 7.34 (d, *J* = 8.1 Hz, 1H), 7.18 (ddd, *J* = 8.2, 6.9, 1.2 Hz, 1H), 7.11 (ddd, *J* = 8.0, 7.0, 1.1 Hz, 1H), 6.98 (s, 1H), 3.65 (s, 3H), 3.18 (s, 3H), 2.80 (t, *J* = 6.5 Hz, 2H), 2.48 (t, *J* = 7.1 Hz, 2H), 1.81 -1.75 (m, 4H).

**<sup>13</sup>C NMR** (126 MHz, CDCl<sub>3</sub>) δ 174.8, 136.5, 127.7, 121.9, 121.4, 119.1, 119.0, 116.5, 111.2, 61.3, 31.9, 30.0, 25.1, 24.7.

**HRMS** (EI) (*m/z*): calculated for C<sub>15</sub>H<sub>20</sub>N<sub>2</sub>O<sub>2</sub> [M]<sup>+</sup>: 260.1520; found 260.1521.

#### 1-(1*H*-indol-3-yl)nonan-5-one

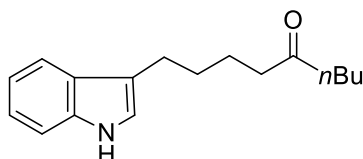

To a solution of 5-(1*H*-indol-3-yl)-*N*-methoxy-*N*-methylpentanamide (150 mg, 0.57 mmol, 1 equiv.) in THF (10 mL) was slowly added *n*BuLi (2.5 M, 530 μL, 2.3 equiv.) at -78°C. After stirring at that temperature for 1.5 h, the solution was slowly warmed up to room temperature and

then quenched with cold saturated  $\text{NH}_4\text{Cl}$ . The mixture was extracted by DCM for 3 times. The combined organic layers were collected and dried over  $\text{Na}_2\text{SO}_4$ , and concentrated under reduced pressure. The residue was purified by silica column chromatography (hexane:EtOAc = 5:1) to afford desired product in 68% yield (100 mg).

**$^1\text{H}$  NMR** (501 MHz,  $\text{CDCl}_3$ )  $\delta$  8.08 (bs, 1H), 7.63 (dd,  $J$  = 7.9, 1.1 Hz, 1H), 7.35 (dt,  $J$  = 8.2, 0.9 Hz, 1H), 7.21 (ddd,  $J$  = 8.2, 7.0, 1.2 Hz, 1H), 7.14 (ddd,  $J$  = 8.0, 7.0, 1.1 Hz, 1H), 6.95 (dd,  $J$  = 2.3, 1.1 Hz, 1H), 2.80 (t,  $J$  = 7.1 Hz, 2H), 2.46 (t,  $J$  = 6.9 Hz, 2H), 2.41 (t,  $J$  = 7.5 Hz, 2H), 1.79–1.66 (m, 4H), 1.58 (p,  $J$  = 7.5 Hz, 2H), 1.42–1.25 (m, 2H), 0.94 (t,  $J$  = 7.3 Hz, 3H).

**$^{13}\text{C}$  NMR** (126 MHz,  $\text{CDCl}_3$ )  $\delta$  211.9, 136.5, 127.6, 121.8, 121.4, 119.1, 118.9, 116.3, 111.2, 42.7, 42.6, 29.8, 26.1, 25.1, 23.9, 22.4, 13.9.

**HRMS** (ESI) ( $m/z$ ): calculated for  $\text{C}_{17}\text{H}_{24}\text{N}_1\text{O}_1$  [ $\text{M}+\text{H}$ ] $^+$ : 258.1852; found 258.1853.

### 3-(5-methylenenonyl)-1H-indole(**13**)

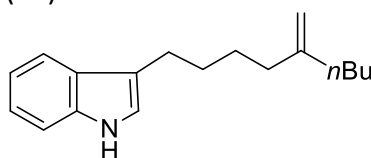

To a solution of 1M  $t\text{BuOK}$  (2.7 mL, 2.68 mmol, 3.0 equiv.) in 10 mL THF was added methyltriphenylphosphonium bromide (480 mg, 1.34 mmol, 1.5 equiv.) then the suspension was stirred at room temperature for 30 min. To the mixture, the solution of 1-(1H-indol-3-yl)nonan-5-one (230 mg, 0.89 mmol, 1 equiv.) in 5 mL THF was slowly added at room temperature and then stirred for 15 h. The reaction mixture was quenched with saturated  $\text{NH}_4\text{Cl}$  and extracted with DCM for 3 times. The combined organic layers were collected and dried over  $\text{Na}_2\text{SO}_4$ , and concentrated under reduced pressure. The residue was purified by silica column chromatography (hexane:EtOAc = 10:1) to afford product 190 mg in 83 % yield.

**$^1\text{H}$  NMR** (501 MHz,  $\text{CDCl}_3$ )  $\delta$  7.87 (s, 1H), 7.64 (dd,  $J$  = 7.9, 1.0 Hz, 1H), 7.36 (dt,  $J$  = 8.1, 0.9 Hz, 1H), 7.21 (ddd,  $J$  = 8.2, 7.0, 1.2 Hz, 1H), 7.13 (ddd,  $J$  = 8.0, 7.0, 1.1 Hz, 1H), 6.98 (dd,  $J$  = 2.2, 1.1 Hz, 1H), 4.73 (s, 2H), 2.79 (t,  $J$  = 7.6 Hz, 2H), 2.09 (t,  $J$  = 7.6 Hz, 2H), 2.03 (t,  $J$  = 7.6 Hz, 2H), 1.84–1.70 (m, 2H), 1.64–1.53 (m, 2H), 1.49–1.39 (m, 2H), 1.37–1.27 (m, 2H), 0.93 (t,  $J$  = 7.2 Hz, 3H).

**$^{13}\text{C}$  NMR** (126 MHz,  $\text{CDCl}_3$ )  $\delta$  150.4, 136.5, 127.74, 122.0, 121.1, 119.2, 119.1, 117.2, 111.1, 108.7, 36.1, 35.9, 30.2, 30.0, 27.9, 25.2, 22.7, 14.2.

**HRMS** (ESI) ( $m/z$ ): calculated for  $\text{C}_{18}\text{H}_{24}\text{N}_1$  [ $\text{M}-\text{H}$ ] $^-$ : 254.1914; found 254.1914.

## 6. Control experiments

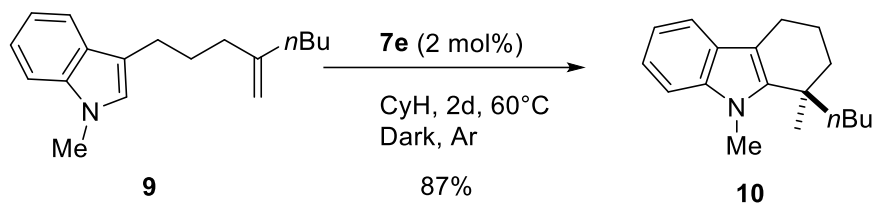

Scheme S13. Hydroarylation of olefin with methylated indole **9**

### 1-butyl-1,9-dimethyl-2,3,4,9-tetrahydro-1H-carbazole (**10**)

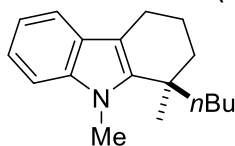

A Schlenk tube equipped with an aluminum foil was charged with IDPi **7e** (2 mol%) under Argon, substrate **9** (0.15 mmol) and cyclohexane (0.1 M) were added at room temperature. The resulting solution was heated at 60 °C for 2 days and the reaction was monitored by TLC. After full consumption of the starting material, the reaction mixture was diluted with pentane and directly purified by silica gel column chromatography (Pentane:Et<sub>2</sub>O = 10:1) to afford the desired product in 87% yield.

**<sup>1</sup>H NMR** (501 MHz, CDCl<sub>3</sub>) δ 7.49 (dt, *J* = 7.7, 1.0 Hz, 1H), 7.27 (d, *J* = 8.6 Hz, 1H), 7.19 (td, *J* = 7.0, 1.2 Hz, 1H), 7.09 (td, *J* = 7.0, 1.0 Hz, 1H), 3.80 (s, 3H), 2.84–2.73 (m, 1H), 2.66 (ddd, *J* = 15.1, 9.2, 5.4 Hz, 1H), 2.09–1.74 (m, 4H), 1.66–1.54 (m, 2H), 1.39 (s, 3H), 1.36–1.24 (m, 3H), 1.10–0.96 (m, 1H), 0.89 (t, *J* = 7.1 Hz, 3H).

**<sup>13</sup>C NMR** (126 MHz, CDCl<sub>3</sub>) δ 141.4, 137.5, 127.0, 120.9, 118.7, 118.1, 110.5, 108.5, 40.9, 38.7, 36.0, 31.8, 27.4, 26.9, 23.6, 22.2, 20.5, 14.2.

**HRMS** (EI) (*m/z*): calculated for C<sub>18</sub>H<sub>25</sub>N<sub>1</sub> [*M*]<sup>+</sup>: 255.1981; found 255.1987.

The enantiomeric ratio was measured by HPLC analysis using following parameters: Daicel Chiralcel OJ-3 column: *n*Hept:*i*PrOH = 99:1, flow rate 0.7 mL/ min, *t*<sub>major</sub> = 4.2 min, *t*<sub>minor</sub> = 5.6 min. e.r. = 71:29

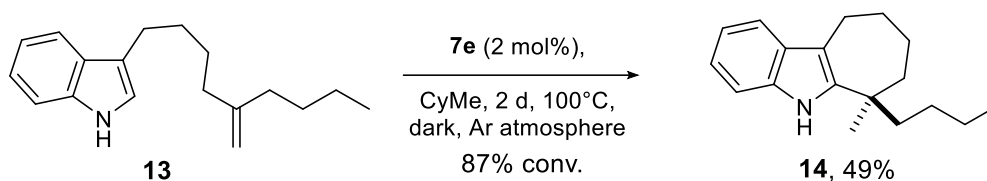

Scheme S14. Hydroarylation of substrate **13**

### (*R*)-6-butyl-6-methyl-5,6,7,8,9,10-hexahydrocyclohepta[*b*]indole (**14**)

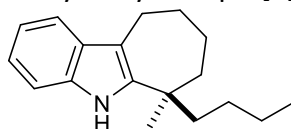

Reactions were performed with substrate **13** (0.02 mmol) in the presence of with IDPi **7e** (2 mol%) under Argon in methylcyclohexane (0.1 M) at 100 °C for 2 days. Conversions, yields and regioisomeric ratios were determined by <sup>1</sup>H NMR analysis with mesitylene as an internal standard. Some amount of isomerization of the 1,1-disubstituted olefin leading to the

trisubstituted olefins was observed (a mixture of regioisomers, NMR signals were represented as **\*isom.** in the following figure), which remain unreactive under the reaction conditions. The moderate yield is presumably due to the isomerization.

**<sup>1</sup>H NMR** (501 MHz, CDCl<sub>3</sub>) δ 7.84 (bs, 1H), 7.49 (d, *J* = 6.9 Hz, 1H), 7.29 (d, *J* = 6.9 Hz, 1H), 7.14–7.04 (m, 2H), 3.02–2.93 (m, 1H), 2.73–2.71 (m, 1H), 1.99–1.81 (m, 4H), 1.79–1.51 (m, 4H), 1.37 (s, 3H), 1.33–1.20 (m, 4H), 0.87 (t, *J* = 7.1 Hz, 3H).

**<sup>13</sup>C NMR** (126 MHz, CDCl<sub>3</sub>) δ 142.9, 133.9, 129.2, 120.7, 119.0, 117.8, 112.5, 110.3, 39.8, 39.7, 38.9, 28.6, 26.7, 26.3, 26.0, 24.1, 23.6, 14.2.

**HRMS** (EI) (*m/z*): calculated for C<sub>18</sub>H<sub>25</sub>N<sub>1</sub> [M]<sup>+</sup>: 255.1981; found 255.1984.

The enantiomeric ratio was measured by HPLC analysis using following parameters: Daicel Chiralcel IB-3 column: *n*Hept:*i*PrOH = 95:5, flow rate 0.7 mL/ min, *t*<sub>major</sub> = 6.6 min, *t*<sub>minor</sub> = 7.6 min. e.r. = 76:24.

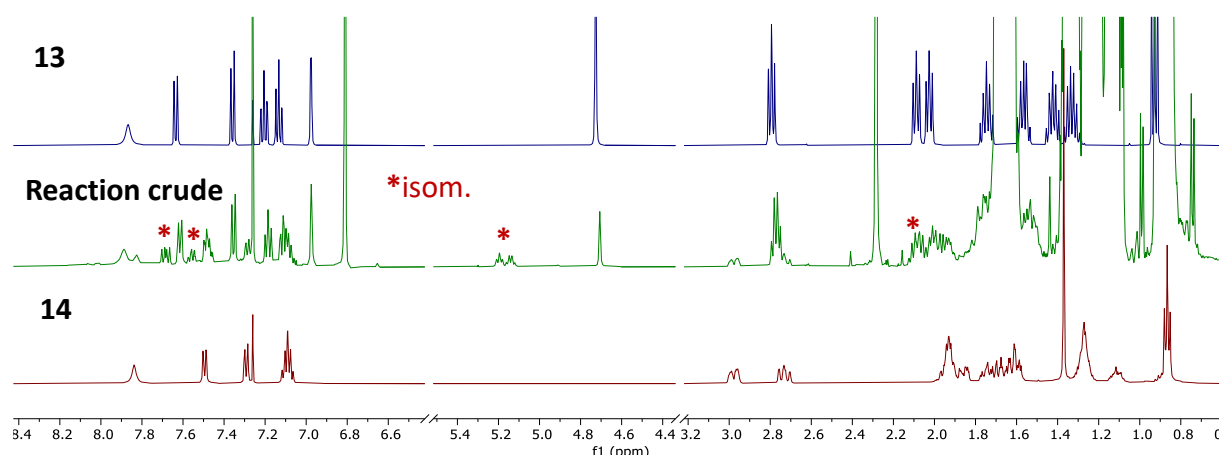

Figure S1. Stacked <sup>1</sup>H NMR of the formation of 7-membered ring **14** (CDCl<sub>3</sub>, 501 MHz)

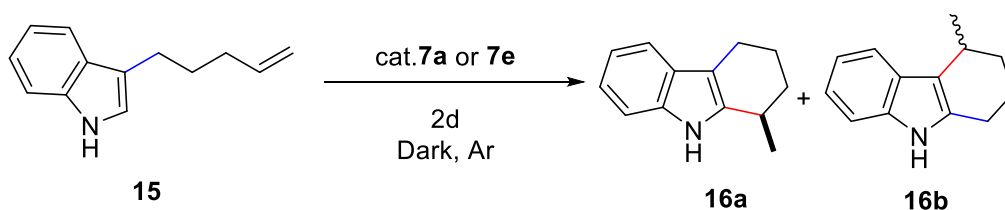

| catalyst  | loading | T (°C) | conv. | yield | r.r   | e.r. <b>16a</b> . |
|-----------|---------|--------|-------|-------|-------|-------------------|
| <b>7a</b> | 4 mol%  | 100    | 95%   | 70%   | 6.7:1 | 51:49             |
| <b>7a</b> | 4 mol%  | 60     | <10%  | trace | nd    | nd                |
| <b>7e</b> | 2 mol%  | 60     | Full  | 72%   | >20:1 | 69:31             |

Scheme S15. Hydroarylation of monosubstituted terminal olefin **15**

A Schlenk tube equipped with an aluminum foil was charged with IDPi (2 mol %) under Argon, substrate **15** (0.02 mmol) and cyclohexane or methylcyclohexane (0.1 M) were added at room temperature. The resulting solution was heated at 60 °C or 100 °C for 2 days and the reaction was monitored by TLC. Conversions, yields and regioisomeric ratios (r.r.) were obtained by <sup>1</sup>H NMR analysis with mesitylene as an internal standard. Chiralcel IB-3 column: *n*Hept:*i*PrOH

= 95:5, flow rate 0.7 mL/min,  $t_{\text{major}} = 7.7$  min,  $t_{\text{minor}} = 8.2$  min. e.r. = 69:31. Here, the protonation of **15** will lead to a secondary rather than a tertiary cation as in all other cases. The lower enantiomeric ratio was presumably due to the more challenging enantidifferentiation of this highly reactive and sterically unbiased cation.

**15** was prepared following to the reported procedure.<sup>12</sup>

The analytic data of **16a** was identical to the reported value.<sup>13</sup>

The analytic data of **16b** was identical to the reported value.<sup>14</sup> \*Represents NMR signal of **16b** in the following Figure.

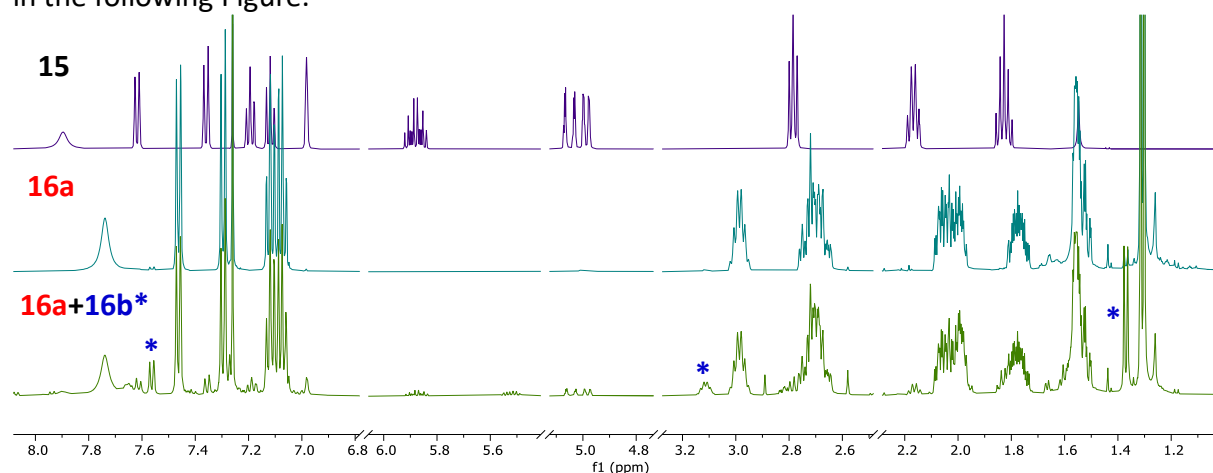

Figure S2. Stacked <sup>1</sup>H NMR of regioisomers of **16** (CDCl<sub>3</sub>, 501 MHz)

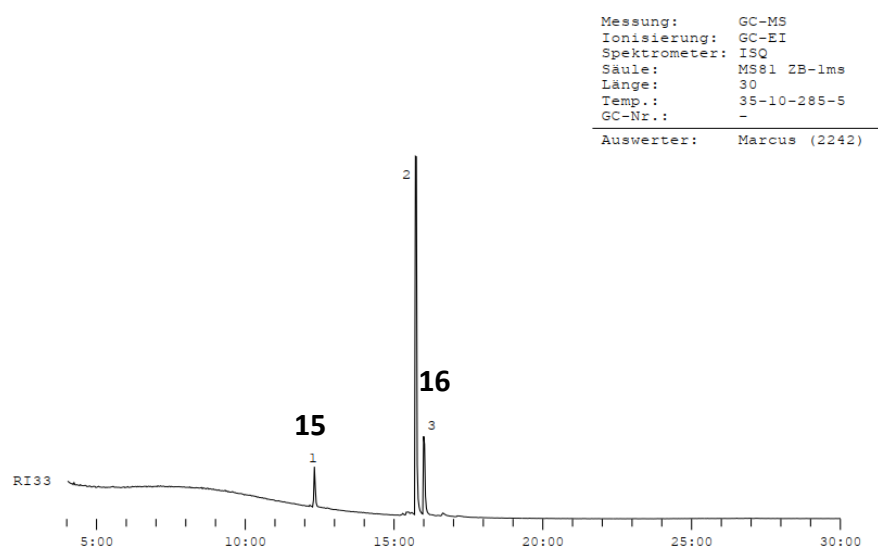

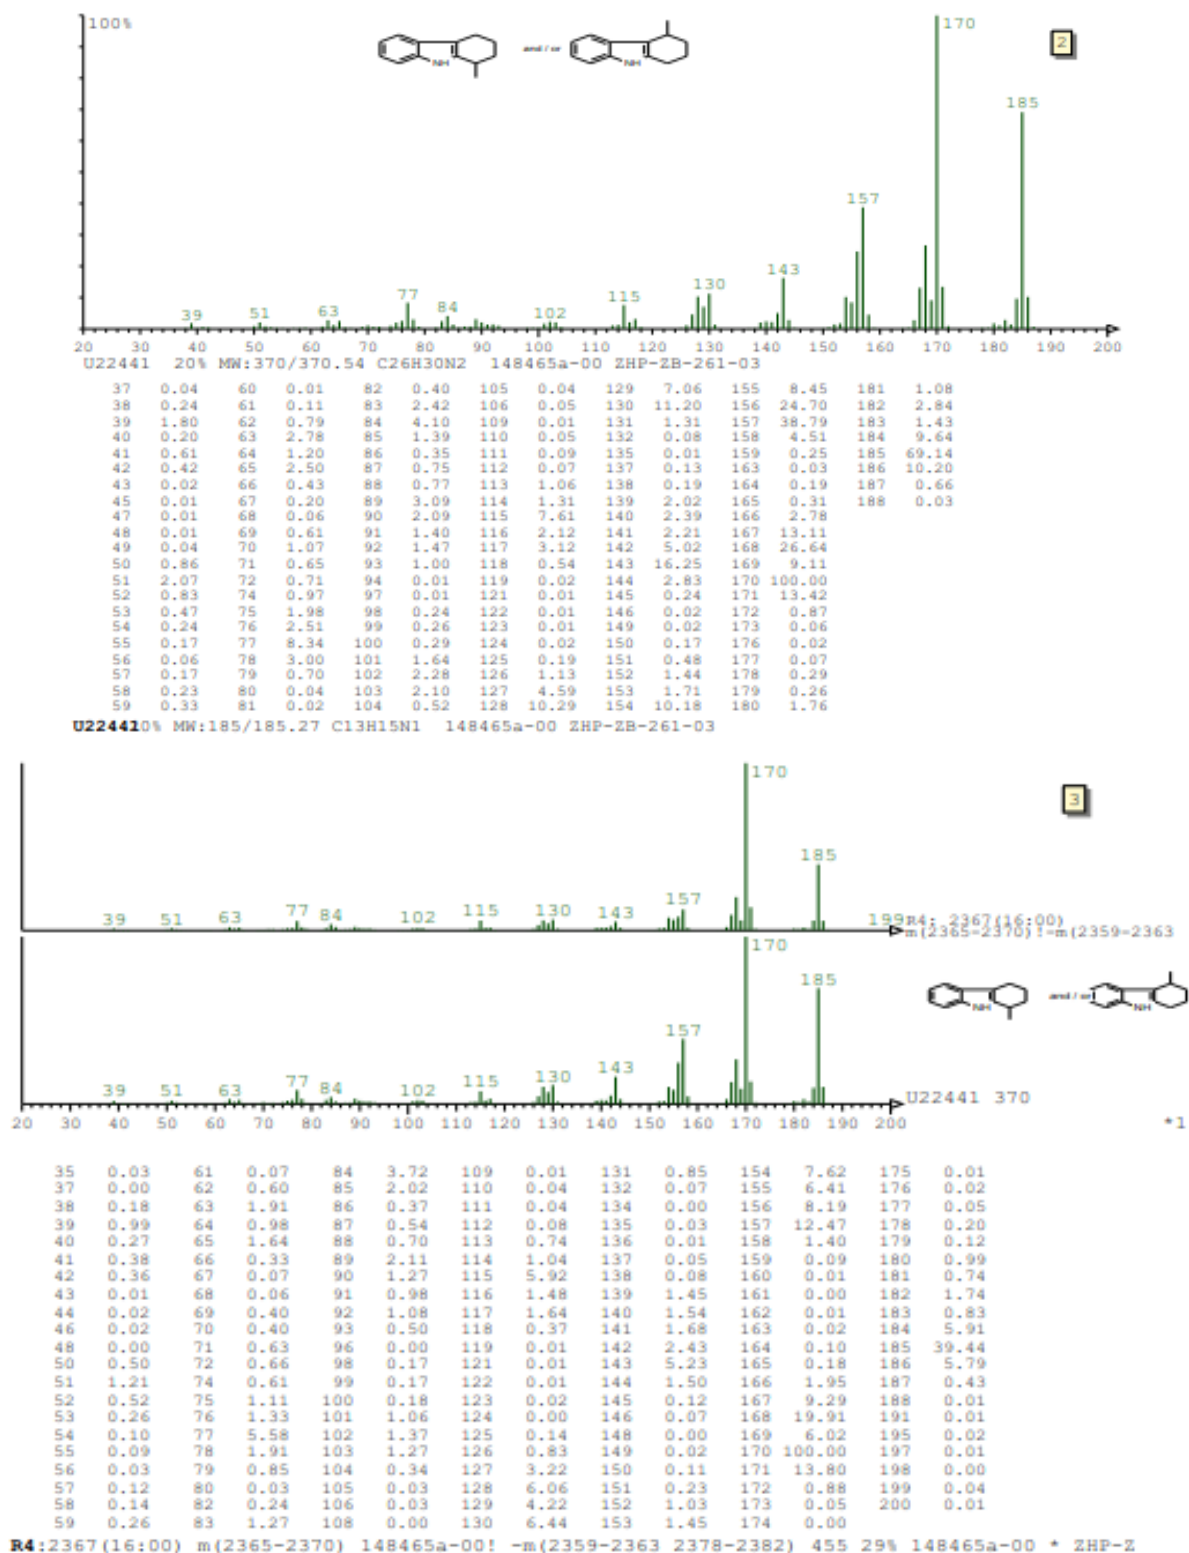

Figure S3. GC-MS of regioisomers of 16

## 7. NMR study

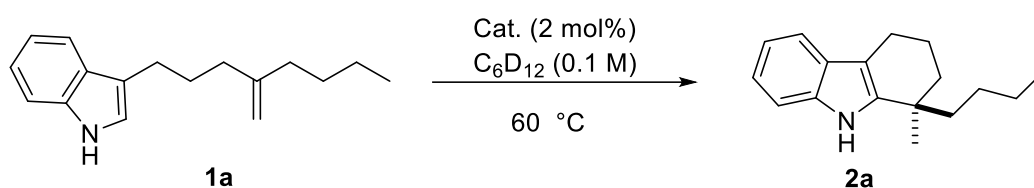

Scheme **S15**. NMR study

A solution of **1a** (7.23 mg, 0.03 mmol, 1 equiv.) and catalyst **7e** (1.62 mg, 2 mol %) in 300  $\mu\text{L}$   $\text{C}_6\text{D}_{12}$  was transferred in a 3 mm J-Young NMR tube. The sample was placed inside to a preheated to 60  $^{\circ}\text{C}$  NMR machine.  $^1\text{H}$  NMR was recorded every 15 min for 48h, only signals attributed to **1a** and **2a** were observed. Select spectra were stacked and presented in the following. SM (starting material) **1a**, pro (product): **2a**.

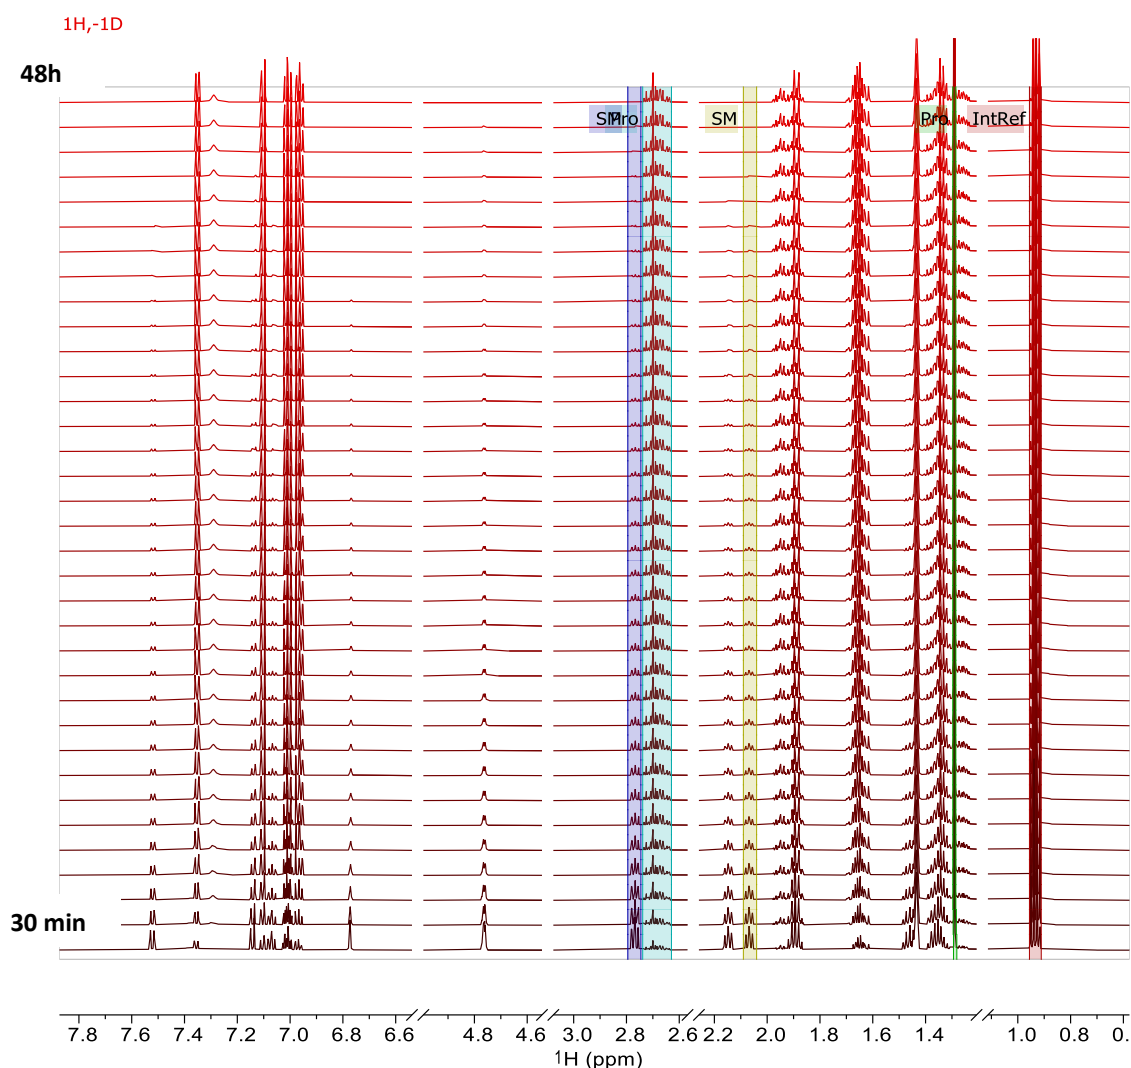

Figure **S4**. Stacked  $^1\text{H}$  NMR,  $\text{C}_6\text{D}_{12}$ , 60 $^{\circ}\text{C}$ , SM **1a**, Pro **2a**.

## 8. X-Ray analysis

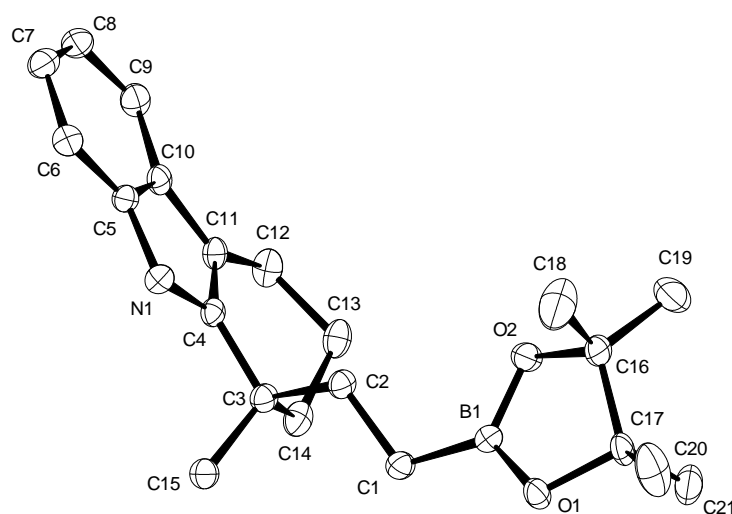

Figure S5. Single-crystal X-ray diffraction of **2t**

**Table S1. Crystal data and structure refinement.**

|                             |                                                                                                  |
|-----------------------------|--------------------------------------------------------------------------------------------------|
| Identification code         | 13531                                                                                            |
| Empirical formula           | C <sub>21</sub> H <sub>30</sub> B N O <sub>2</sub>                                               |
| Color                       | colourless                                                                                       |
| Formula weight              | 339.27 g · mol <sup>-1</sup>                                                                     |
| Temperature                 | 100(2) K                                                                                         |
| Wavelength                  | 1.54178 Å                                                                                        |
| Crystal system              | ORTHORHOMBIC                                                                                     |
| Space group                 | <b>P2<sub>1</sub>2<sub>1</sub>2<sub>1</sub>, (no. 19)</b>                                        |
| Unit cell dimensions        | a = 8.0048(3) Å      α = 90°.<br>b = 9.3168(3) Å      β = 90°.<br>c = 25.9145(9) Å      γ = 90°. |
| Volume                      | 1932.68(12) Å <sup>3</sup>                                                                       |
| Z                           | 4                                                                                                |
| Density (calculated)        | 1.166 Mg · m <sup>-3</sup>                                                                       |
| Absorption coefficient      | 0.565 mm <sup>-1</sup>                                                                           |
| F(000)                      | 736 e                                                                                            |
| Crystal size                | 0.296 x 0.256 x 0.070 mm <sup>3</sup>                                                            |
| θ range for data collection | 3.411 to 71.761°.                                                                                |
| Index ranges                | -9 ≤ h ≤ 9, -11 ≤ k ≤ 10, -31 ≤ l ≤ 31                                                           |
| Reflections collected       | 69388                                                                                            |
| Independent reflections     | 3718 [R <sub>int</sub> = 0.0413]                                                                 |
| Reflections with I > 2σ(I)  | 3338                                                                                             |
| Completeness to θ = 67.679° | 99.6 %                                                                                           |
| Absorption correction       | Gaussian                                                                                         |
|                             | S56                                                                                              |

|                                      |                                    |                 |
|--------------------------------------|------------------------------------|-----------------|
| Max. and min. transmission           | 0.96 and 0.90                      |                 |
| Refinement method                    | Full-matrix least-squares on $F^2$ |                 |
| Data / restraints / parameters       | 3718 / 0 / 235                     |                 |
| Goodness-of-fit on $F^2$             | 1.167                              |                 |
| Final R indices [ $I > 2\sigma(I)$ ] | $R_1 = 0.0349$                     | $wR^2 = 0.0856$ |
| R indices (all data)                 | $R_1 = 0.0615$                     | $wR^2 = 0.1012$ |
| Absolute structure parameter         | 0.05(3)                            |                 |
| Largest diff. peak and hole          | 0.3 and -0.3 e · Å <sup>-3</sup>   |                 |

**Table S2. Bond lengths [Å] and angles [°].**

|                  |                   |                   |          |
|------------------|-------------------|-------------------|----------|
| <hr/>            |                   |                   |          |
| —                |                   |                   |          |
| O(1)-C(17)       | 1.473(3)          | O(1)-B(1)         | 1.375(3) |
| O(2)-C(16)       | 1.461(3)          | O(2)-B(1)         | 1.364(3) |
| N(1)-H(1)        | 0.90(3)           | N(1)-C(4)         | 1.390(3) |
| N(1)-C(5)        | 1.378(3)          | C(1)-C(2)         | 1.541(3) |
| C(1)-B(1)        | 1.561(3)          | C(2)-C(3)         | 1.547(3) |
| C(3)-C(4)        | 1.507(3)          | C(3)-C(14)        | 1.547(3) |
| C(3)-C(15)       | 1.533(3)          | C(4)-C(11)        | 1.369(3) |
| C(5)-C(6)        | 1.397(3)          | C(5)-C(10)        | 1.412(3) |
| C(6)-C(7)        | 1.385(3)          | C(7)-C(8)         | 1.401(3) |
| C(8)-C(9)        | 1.382(3)          | C(9)-C(10)        | 1.404(3) |
| C(10)-C(11)      | 1.438(3)          | C(11)-C(12)       | 1.497(3) |
| C(12)-C(13)      | 1.521(3)          | C(13)-C(14)       | 1.528(3) |
| C(16)-C(17)      | 1.549(3)          | C(16)-C(18)       | 1.507(4) |
| C(16)-C(19)      | 1.521(4)          | C(17)-C(20)       | 1.514(3) |
| C(17)-C(21)      | 1.510(3)          |                   |          |
| <br>             |                   |                   |          |
| B(1)-O(1)-C(17)  | 107.32(17)        | B(1)-O(2)-C(16)   |          |
| 107.42(17)       | C(4)-N(1)-H(1)    | 127.9(19)         | C(5)-    |
| N(1)-H(1)        | 122.8(19)         | C(5)-N(1)-C(4)    |          |
| 108.69(18)       | C(2)-C(1)-B(1)    | 112.04(18)        | C(1)-    |
| C(2)-C(3)        | 117.19(18)        | C(4)-C(3)-C(2)    |          |
| 108.41(17)       | C(4)-C(3)-C(14)   | 106.17(17)        | C(4)-    |
| C(3)-C(15)       | 111.18(19)        | C(14)-C(3)-C(2)   |          |
| 111.11(18)       | C(15)-C(3)-C(2)   | 110.10(18)        | C(15)-   |
| C(3)-C(14)       | 109.81(19)        | N(1)-C(4)-C(3)    |          |
| 123.65(19)       | C(11)-C(4)-N(1)   | 109.44(18)        | C(11)-   |
| C(4)-C(3)        | 126.81(19)        | N(1)-C(5)-C(6)    | 130.3(2) |
| N(1)-C(5)-C(10)  | 107.95(18)        | C(6)-C(5)-C(10)   | 121.8(2) |
| C(7)-C(6)-C(5)   | 117.7(2)          | C(6)-C(7)-C(8)    | 121.2(2) |
| C(9)-C(8)-C(7)   | 121.2(2)          | C(8)-C(9)-C(10)   | 118.8(2) |
| C(5)-C(10)-C(11) | 106.72(18)        | C(9)-C(10)-C(5)   | 119.2(2) |
| C(9)-C(10)-C(11) | 134.0(2)          | C(4)-C(11)-C(10)  |          |
| 107.19(18)       | C(4)-C(11)-C(12)  | 123.5(2)          | C(10)-   |
| C(11)-C(12)      | 129.3(2)          | C(11)-C(12)-C(13) |          |
| 109.45(18)       | C(12)-C(13)-C(14) | 111.37(19)        | C(13)-   |
| C(14)-C(3)       | 114.03(18)        | O(2)-C(16)-C(17)  |          |

|                   |                  |                   |          |
|-------------------|------------------|-------------------|----------|
| 102.48(17)        | O(2)-C(16)-C(18) | 105.6(2)          | O(2)-    |
| C(16)-C(19)       | 108.1(2)         | C(18)-C(16)-C(17) | 114.5(2) |
| C(18)-C(16)-C(19) | 110.5(2)         | C(19)-C(16)-C(17) | 114.7(2) |
| O(1)-C(17)-C(16)  | 101.59(16)       | O(1)-C(17)-C(20)  |          |
| 109.69(19)        | O(1)-C(17)-C(21) | 107.13(19)        | C(20)-   |
| C(17)-C(16)       | 114.5(2)         | C(21)-C(17)-C(16) | 113.2(2) |
| C(21)-C(17)-C(20) | 110.1(2)         | O(1)-B(1)-C(1)    | 124.8(2) |
| O(2)-B(1)-O(1)    | 112.4(2)         | O(2)-B(1)-C(1)    |          |
| 122.80(19)        |                  |                   |          |

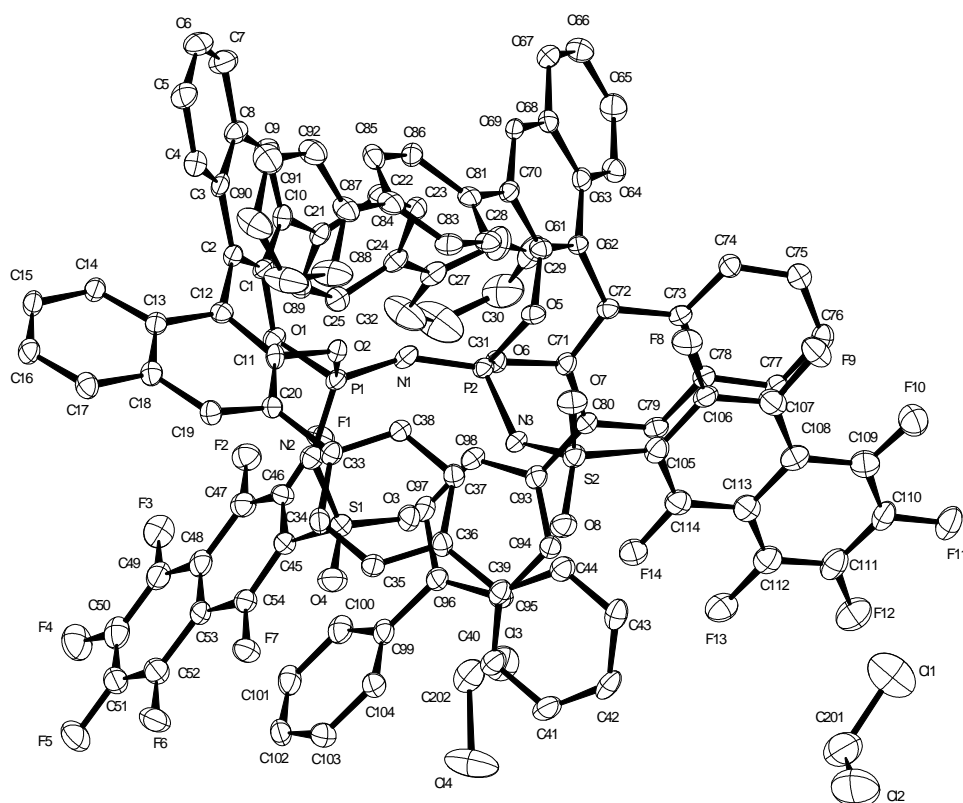

Figure S6. Single-crystal X-ray diffraction of **7c**

**Table S3. Crystal data and structure refinement.**

|                             |                                                                                                                                 |
|-----------------------------|---------------------------------------------------------------------------------------------------------------------------------|
| Identification code         | 13247                                                                                                                           |
| Empirical formula           | C <sub>110</sub> H <sub>61</sub> Cl <sub>4</sub> F <sub>14</sub> N <sub>3</sub> O <sub>8</sub> P <sub>2</sub> S <sub>2</sub>    |
| Color                       | colourless                                                                                                                      |
| Formula weight              | 2086.47 g·mol <sup>-1</sup>                                                                                                     |
| Temperature                 | 100(2) K                                                                                                                        |
| Wavelength                  | 0.71073 Å                                                                                                                       |
| Crystal system              | Orthorhombic                                                                                                                    |
| Space group                 | <i>P</i> 2 <sub>1</sub> 2 <sub>1</sub> 2 <sub>1</sub> , (No. 19)                                                                |
| Unit cell dimensions        | <i>a</i> = 14.3036(7) Å <i>α</i> = 90°.<br><i>b</i> = 23.2545(12) Å <i>β</i> = 90°.<br><i>c</i> = 28.5467(15) Å <i>γ</i> = 90°. |
| Volume                      | 9495.3(8) Å <sup>3</sup>                                                                                                        |
| <i>Z</i>                    | 4                                                                                                                               |
| Density (calculated)        | 1.460 Mg·m <sup>-3</sup>                                                                                                        |
| Absorption coefficient      | 0.292 mm <sup>-1</sup>                                                                                                          |
| F(000)                      | 4248 e                                                                                                                          |
| Crystal size                | 0.060 x 0.051 x 0.043 mm <sup>3</sup>                                                                                           |
| θ range for data collection | 1.427 to 30.998°.                                                                                                               |

|                                         |                                                              |                 |
|-----------------------------------------|--------------------------------------------------------------|-----------------|
| Index ranges                            | $-20 \leq h \leq 20, -33 \leq k \leq 31, -41 \leq l \leq 41$ |                 |
| Reflections collected                   | 323711                                                       |                 |
| Independent reflections                 | 30283 [ $R_{\text{int}} = 0.0859$ ]                          |                 |
| Reflections with $I > 2\sigma(I)$       | 23128                                                        |                 |
| Completeness to $\theta = 25.242^\circ$ | 99.8 %                                                       |                 |
| Absorption correction                   | Gaussian                                                     |                 |
| Max. and min. transmission              | 0.99053 and 0.98690                                          |                 |
| Refinement method                       | Full-matrix least-squares on $F^2$                           |                 |
| Data / restraints / parameters          | 30283 / 0 / 1292                                             |                 |
| Goodness-of-fit on $F^2$                | 1.041                                                        |                 |
| Final R indices [ $I > 2\sigma(I)$ ]    | $R_1 = 0.0523$                                               | $wR^2 = 0.1210$ |
| R indices (all data)                    | $R_1 = 0.0786$                                               | $wR^2 = 0.1329$ |
| Absolute structure parameter            | 0.009(13)                                                    |                 |
| Extinction coefficient                  | n/a                                                          |                 |
| Largest diff. peak and hole             | 0.823 and $-0.817 \text{ e} \cdot \text{\AA}^{-3}$           |                 |

**Table S4. Bond lengths [Å] and angles [°].**

|               |          |               |          |
|---------------|----------|---------------|----------|
| <hr/>         |          |               |          |
| —             |          |               |          |
| Cl(1)-C(201)  | 1.726(6) | Cl(2)-C(201)  | 1.766(7) |
| C(201)-H(20A) | 0.9900   | C(201)-H(20B) | 0.9900   |
| Cl(3)-C(202)  | 1.754(5) | Cl(4)-C(202)  | 1.757(5) |
| C(202)-H(20C) | 0.9900   | C(202)-H(20D) | 0.9900   |
| S(1)-O(3)     | 1.449(3) | S(1)-O(4)     | 1.419(3) |
| S(1)-N(2)     | 1.546(3) | S(1)-C(45)    | 1.795(4) |
| S(2)-O(7)     | 1.425(3) | S(2)-O(8)     | 1.412(3) |
| S(2)-N(3)     | 1.653(3) | S(2)-C(105)   | 1.784(4) |
| P(1)-O(1)     | 1.584(2) | P(1)-O(2)     | 1.588(2) |
| P(1)-N(1)     | 1.555(3) | P(1)-N(2)     | 1.582(3) |
| P(2)-O(5)     | 1.571(2) | P(2)-O(6)     | 1.579(2) |
| P(2)-N(1)     | 1.530(3) | P(2)-N(3)     | 1.658(3) |
| F(1)-C(46)    | 1.338(4) | F(2)-C(47)    | 1.351(4) |
| F(3)-C(49)    | 1.339(5) | F(4)-C(50)    | 1.342(5) |
| F(5)-C(51)    | 1.328(4) | F(6)-C(52)    | 1.345(5) |
| F(7)-C(54)    | 1.341(4) | F(8)-C(106)   | 1.300(4) |
| F(9)-C(107)   | 1.335(4) | F(10)-C(109)  | 1.321(5) |
| F(11)-C(110)  | 1.337(4) | F(12)-C(111)  | 1.329(5) |
| F(13)-C(112)  | 1.367(5) | F(14)-C(114)  | 1.334(4) |
| O(1)-C(1)     | 1.412(4) | O(2)-C(11)    | 1.403(4) |
| O(5)-C(61)    | 1.413(4) | O(6)-C(71)    | 1.420(4) |
| N(3)-H(3)     | 1.01(4)  | C(1)-C(2)     | 1.385(5) |
| C(1)-C(10)    | 1.406(5) | C(2)-C(3)     | 1.436(5) |
| C(2)-C(12)    | 1.488(5) | C(3)-C(4)     | 1.431(5) |
| C(3)-C(8)     | 1.416(5) | C(4)-H(4)     | 0.9500   |
| C(4)-C(5)     | 1.362(5) | C(5)-H(5)     | 0.9500   |
| C(5)-C(6)     | 1.416(6) | C(6)-H(6)     | 0.9500   |
| C(6)-C(7)     | 1.363(5) | C(7)-H(7)     | 0.9500   |
| C(7)-C(8)     | 1.421(5) | C(8)-C(9)     | 1.418(5) |
| C(9)-H(9)     | 0.9500   | C(9)-C(10)    | 1.376(5) |
| C(10)-C(21)   | 1.488(5) | C(11)-C(12)   | 1.375(5) |
| C(11)-C(20)   | 1.429(5) | C(12)-C(13)   | 1.434(4) |
| C(13)-C(14)   | 1.413(5) | C(13)-C(18)   | 1.416(5) |
| C(14)-H(14)   | 0.9500   | C(14)-C(15)   | 1.373(5) |
| C(15)-H(15)   | 0.9500   | C(15)-C(16)   | 1.400(6) |
| C(16)-H(16)   | 0.9500   | C(16)-C(17)   | 1.368(5) |

|             |          |             |          |
|-------------|----------|-------------|----------|
| C(17)-H(17) | 0.9500   | C(17)-C(18) | 1.424(5) |
| C(18)-C(19) | 1.426(5) | C(19)-H(19) | 0.9500   |
| C(19)-C(20) | 1.363(5) | C(20)-C(33) | 1.487(5) |
| C(21)-C(22) | 1.411(5) | C(21)-C(26) | 1.383(5) |
| C(22)-H(22) | 0.9500   | C(22)-C(23) | 1.396(5) |
| C(23)-H(23) | 0.9500   | C(23)-C(24) | 1.391(5) |
| C(24)-C(25) | 1.398(5) | C(24)-C(27) | 1.488(5) |
| C(25)-H(25) | 0.9500   | C(25)-C(26) | 1.388(5) |
| C(26)-H(26) | 0.9500   | C(27)-C(28) | 1.396(5) |
| C(27)-C(32) | 1.388(6) | C(28)-H(28) | 0.9500   |
| C(28)-C(29) | 1.390(6) | C(29)-H(29) | 0.9500   |
| C(29)-C(30) | 1.362(7) | C(30)-H(30) | 0.9500   |
| C(30)-C(31) | 1.407(8) | C(31)-H(31) | 0.9500   |
| C(31)-C(32) | 1.386(7) | C(32)-H(32) | 0.9500   |
| C(33)-C(34) | 1.384(5) | C(33)-C(38) | 1.400(5) |
| C(34)-H(34) | 0.9500   | C(34)-C(35) | 1.377(5) |
| C(35)-H(35) | 0.9500   | C(35)-C(36) | 1.402(5) |
| C(36)-C(37) | 1.387(5) | C(36)-C(39) | 1.480(5) |
| C(37)-H(37) | 0.9500   | C(37)-C(38) | 1.403(5) |
| C(38)-H(38) | 0.9500   | C(39)-C(40) | 1.397(5) |
| C(39)-C(44) | 1.392(5) | C(40)-H(40) | 0.9500   |
| C(40)-C(41) | 1.386(5) | C(41)-H(41) | 0.9500   |
| C(41)-C(42) | 1.379(6) | C(42)-H(42) | 0.9500   |
| C(42)-C(43) | 1.398(6) | C(43)-H(43) | 0.9500   |
| C(43)-C(44) | 1.384(5) | C(44)-H(44) | 0.9500   |
| C(45)-C(46) | 1.412(5) | C(45)-C(54) | 1.358(5) |
| C(46)-C(47) | 1.354(5) | C(47)-C(48) | 1.407(5) |
| C(48)-C(49) | 1.413(5) | C(48)-C(53) | 1.411(6) |
| C(49)-C(50) | 1.367(6) | C(50)-C(51) | 1.385(7) |
| C(51)-C(52) | 1.370(6) | C(52)-C(53) | 1.419(5) |
| C(53)-C(54) | 1.433(5) | C(61)-C(62) | 1.363(4) |
| C(61)-C(70) | 1.424(4) | C(62)-C(63) | 1.433(5) |
| C(62)-C(72) | 1.499(4) | C(63)-C(64) | 1.418(5) |
| C(63)-C(68) | 1.424(5) | C(64)-H(64) | 0.9500   |
| C(64)-C(65) | 1.361(5) | C(65)-H(65) | 0.9500   |
| C(65)-C(66) | 1.415(6) | C(66)-H(66) | 0.9500   |
| C(66)-C(67) | 1.372(5) | C(67)-H(67) | 0.9500   |
| C(67)-C(68) | 1.420(5) | C(68)-C(69) | 1.422(5) |
| C(69)-H(69) | 0.9500   | C(69)-C(70) | 1.371(5) |

|                    |          |                     |          |
|--------------------|----------|---------------------|----------|
| C(70)-C(81)        | 1.486(5) | C(71)-C(72)         | 1.372(4) |
| C(71)-C(80)        | 1.413(4) | C(72)-C(73)         | 1.427(4) |
| C(73)-C(74)        | 1.417(5) | C(73)-C(78)         | 1.428(4) |
| C(74)-H(74)        | 0.9500   | C(74)-C(75)         | 1.370(5) |
| C(75)-H(75)        | 0.9500   | C(75)-C(76)         | 1.401(5) |
| C(76)-H(76)        | 0.9500   | C(76)-C(77)         | 1.375(5) |
| C(77)-H(77)        | 0.9500   | C(77)-C(78)         | 1.430(4) |
| C(78)-C(79)        | 1.414(5) | C(79)-H(79)         | 0.9500   |
| C(79)-C(80)        | 1.379(4) | C(80)-C(93)         | 1.482(5) |
| C(81)-C(82)        | 1.390(5) | C(81)-C(86)         | 1.398(5) |
| C(82)-H(82)        | 0.9500   | C(82)-C(83)         | 1.396(5) |
| C(83)-H(83)        | 0.9500   | C(83)-C(84)         | 1.389(5) |
| C(84)-C(85)        | 1.393(6) | C(84)-C(87)         | 1.489(5) |
| C(85)-H(85)        | 0.9500   | C(85)-C(86)         | 1.390(5) |
| C(86)-H(86)        | 0.9500   | C(87)-C(88)         | 1.391(6) |
| C(87)-C(92)        | 1.391(5) | C(88)-H(88)         | 0.9500   |
| C(88)-C(89)        | 1.380(6) | C(89)-H(89)         | 0.9500   |
| C(89)-C(90)        | 1.365(6) | C(90)-H(90)         | 0.9500   |
| C(90)-C(91)        | 1.383(6) | C(91)-H(91)         | 0.9500   |
| C(91)-C(92)        | 1.392(5) | C(92)-H(92)         | 0.9500   |
| C(93)-C(94)        | 1.389(5) | C(93)-C(98)         | 1.408(5) |
| C(94)-H(94)        | 0.9500   | C(94)-C(95)         | 1.396(5) |
| C(95)-H(95)        | 0.9500   | C(95)-C(96)         | 1.391(5) |
| C(96)-C(97)        | 1.402(5) | C(96)-C(99)         | 1.479(5) |
| C(97)-H(97)        | 0.9500   | C(97)-C(98)         | 1.393(5) |
| C(98)-H(98)        | 0.9500   | C(99)-C(100)        | 1.399(5) |
| C(99)-C(104)       | 1.390(5) | C(100)-H(100)       | 0.9500   |
| C(100)-C(101)      | 1.400(5) | C(101)-H(101)       | 0.9500   |
| C(101)-C(102)      | 1.375(6) | C(102)-H(102)       | 0.9500   |
| C(102)-C(103)      | 1.397(6) | C(103)-H(103)       | 0.9500   |
| C(103)-C(104)      | 1.391(5) | C(104)-H(104)       | 0.9500   |
| C(105)-C(106)      | 1.446(5) | C(105)-C(114)       | 1.359(5) |
| C(106)-C(107)      | 1.372(5) | C(107)-C(108)       | 1.399(6) |
| C(108)-C(109)      | 1.439(5) | C(108)-C(113)       | 1.417(5) |
| C(109)-C(110)      | 1.357(6) | C(110)-C(111)       | 1.409(6) |
| C(111)-C(112)      | 1.360(6) | C(112)-C(113)       | 1.388(5) |
| C(113)-C(114)      | 1.436(5) |                     |          |
| Cl(1)-C(201)-Cl(2) | 111.6(3) | Cl(1)-C(201)-H(20A) | 109.3    |

|                     |                  |                      |          |
|---------------------|------------------|----------------------|----------|
| Cl(1)-C(201)-H(20B) | 109.3            | Cl(2)-C(201)-H(20A)  | 109.3    |
| Cl(2)-C(201)-H(20B) | 109.3            | H(20A)-C(201)-H(20B) | 108.0    |
| Cl(3)-C(202)-Cl(4)  | 111.9(3)         | Cl(3)-C(202)-H(20C)  | 109.2    |
| Cl(3)-C(202)-H(20D) | 109.2            | Cl(4)-C(202)-H(20C)  | 109.2    |
| Cl(4)-C(202)-H(20D) | 109.2            | H(20C)-C(202)-H(20D) | 107.9    |
| O(3)-S(1)-N(2)      | 114.03(16)       | O(3)-S(1)-C(45)      |          |
| 104.22(16)          | O(4)-S(1)-O(3)   | 116.81(17)           | O(4)-    |
| S(1)-N(2)           | 109.87(17)       | O(4)-S(1)-C(45)      |          |
| 106.94(17)          | N(2)-S(1)-C(45)  | 103.67(17)           | O(7)-    |
| S(2)-N(3)           | 110.22(16)       | O(7)-S(2)-C(105)     |          |
| 106.03(17)          | O(8)-S(2)-O(7)   | 120.75(17)           | O(8)-    |
| S(2)-N(3)           | 104.84(15)       | O(8)-S(2)-C(105)     |          |
| 108.31(17)          | N(3)-S(2)-C(105) | 105.83(16)           | O(1)-    |
| P(1)-O(2)           | 102.96(12)       | N(1)-P(1)-O(1)       |          |
| 110.07(14)          | N(1)-P(1)-O(2)   | 105.52(14)           | N(1)-    |
| P(1)-N(2)           | 122.24(16)       | N(2)-P(1)-O(1)       |          |
| 104.67(15)          | N(2)-P(1)-O(2)   | 109.82(15)           | O(5)-    |
| P(2)-O(6)           | 105.58(13)       | O(5)-P(2)-N(3)       |          |
| 100.90(14)          | O(6)-P(2)-N(3)   | 109.40(14)           | N(1)-    |
| P(2)-O(5)           | 116.65(15)       | N(1)-P(2)-O(6)       |          |
| 106.62(15)          | N(1)-P(2)-N(3)   | 117.05(16)           | C(1)-    |
| O(1)-P(1)           | 119.5(2)         | C(11)-O(2)-P(1)      | 116.5(2) |
| C(61)-O(5)-P(2)     | 118.5(2)         | C(71)-O(6)-P(2)      | 116.7(2) |
| P(2)-N(1)-P(1)      | 150.3(2)         | S(1)-N(2)-P(1)       |          |
| 134.48(19)          | S(2)-N(3)-P(2)   | 130.16(18)           | S(2)-    |
| N(3)-H(3)           | 114(2)           | P(2)-N(3)-H(3)       | 115(2)   |
| C(2)-C(1)-O(1)      | 117.2(3)         | C(2)-C(1)-C(10)      | 124.6(3) |
| C(10)-C(1)-O(1)     | 118.2(3)         | C(1)-C(2)-C(3)       | 117.5(3) |
| C(1)-C(2)-C(12)     | 120.8(3)         | C(3)-C(2)-C(12)      | 121.4(3) |
| C(4)-C(3)-C(2)      | 123.3(3)         | C(8)-C(3)-C(2)       | 119.0(3) |
| C(8)-C(3)-C(4)      | 117.6(3)         | C(3)-C(4)-H(4)       | 119.3    |
| C(5)-C(4)-C(3)      | 121.4(3)         | C(5)-C(4)-H(4)       | 119.3    |
| C(4)-C(5)-H(5)      | 119.8            | C(4)-C(5)-C(6)       | 120.4(3) |
| C(6)-C(5)-H(5)      | 119.8            | C(5)-C(6)-H(6)       | 120.0    |
| C(7)-C(6)-C(5)      | 120.0(3)         | C(7)-C(6)-H(6)       | 120.0    |
| C(6)-C(7)-H(7)      | 119.6            | C(6)-C(7)-C(8)       | 120.8(4) |
| C(8)-C(7)-H(7)      | 119.6            | C(3)-C(8)-C(7)       | 119.8(3) |
| C(3)-C(8)-C(9)      | 119.9(3)         | C(9)-C(8)-C(7)       | 120.2(3) |
| C(8)-C(9)-H(9)      | 119.1            | C(10)-C(9)-C(8)      | 121.8(3) |

|                   |          |                   |          |
|-------------------|----------|-------------------|----------|
| C(10)-C(9)-H(9)   | 119.1    | C(1)-C(10)-C(21)  | 122.1(3) |
| C(9)-C(10)-C(1)   | 117.0(3) | C(9)-C(10)-C(21)  | 120.8(3) |
| O(2)-C(11)-C(20)  | 117.3(3) | C(12)-C(11)-O(2)  | 118.4(3) |
| C(12)-C(11)-C(20) | 124.3(3) | C(11)-C(12)-C(2)  | 119.8(3) |
| C(11)-C(12)-C(13) | 118.0(3) | C(13)-C(12)-C(2)  | 122.2(3) |
| C(14)-C(13)-C(12) | 122.8(3) | C(14)-C(13)-C(18) | 118.4(3) |
| C(18)-C(13)-C(12) | 118.6(3) | C(13)-C(14)-H(14) | 119.6    |
| C(15)-C(14)-C(13) | 120.8(3) | C(15)-C(14)-H(14) | 119.6    |
| C(14)-C(15)-H(15) | 119.7    | C(14)-C(15)-C(16) | 120.5(3) |
| C(16)-C(15)-H(15) | 119.7    | C(15)-C(16)-H(16) | 119.7    |
| C(17)-C(16)-C(15) | 120.6(3) | C(17)-C(16)-H(16) | 119.7    |
| C(16)-C(17)-H(17) | 120.0    | C(16)-C(17)-C(18) | 120.0(3) |
| C(18)-C(17)-H(17) | 120.0    | C(13)-C(18)-C(17) | 119.6(3) |
| C(13)-C(18)-C(19) | 119.8(3) | C(17)-C(18)-C(19) | 120.6(3) |
| C(18)-C(19)-H(19) | 118.8    | C(20)-C(19)-C(18) | 122.3(3) |
| C(20)-C(19)-H(19) | 118.8    | C(11)-C(20)-C(33) | 122.6(3) |
| C(19)-C(20)-C(11) | 116.4(3) | C(19)-C(20)-C(33) | 120.9(3) |
| C(22)-C(21)-C(10) | 118.7(3) | C(26)-C(21)-C(10) | 123.4(3) |
| C(26)-C(21)-C(22) | 117.9(3) | C(21)-C(22)-H(22) | 119.7    |
| C(23)-C(22)-C(21) | 120.6(3) | C(23)-C(22)-H(22) | 119.7    |
| C(22)-C(23)-H(23) | 119.2    | C(24)-C(23)-C(22) | 121.5(3) |
| C(24)-C(23)-H(23) | 119.2    | C(23)-C(24)-C(25) | 116.9(3) |
| C(23)-C(24)-C(27) | 121.4(3) | C(25)-C(24)-C(27) | 121.7(3) |
| C(24)-C(25)-H(25) | 118.9    | C(26)-C(25)-C(24) | 122.2(3) |
| C(26)-C(25)-H(25) | 118.9    | C(21)-C(26)-C(25) | 120.9(3) |
| C(21)-C(26)-H(26) | 119.6    | C(25)-C(26)-H(26) | 119.6    |
| C(28)-C(27)-C(24) | 121.0(4) | C(32)-C(27)-C(24) | 121.6(4) |
| C(32)-C(27)-C(28) | 117.3(4) | C(27)-C(28)-H(28) | 119.5    |
| C(29)-C(28)-C(27) | 121.0(4) | C(29)-C(28)-H(28) | 119.5    |
| C(28)-C(29)-H(29) | 119.4    | C(30)-C(29)-C(28) | 121.3(4) |
| C(30)-C(29)-H(29) | 119.4    | C(29)-C(30)-H(30) | 120.6    |
| C(29)-C(30)-C(31) | 118.8(4) | C(31)-C(30)-H(30) | 120.6    |
| C(30)-C(31)-H(31) | 120.2    | C(32)-C(31)-C(30) | 119.7(5) |
| C(32)-C(31)-H(31) | 120.2    | C(27)-C(32)-H(32) | 119.1    |
| C(31)-C(32)-C(27) | 121.9(5) | C(31)-C(32)-H(32) | 119.1    |
| C(34)-C(33)-C(20) | 120.1(3) | C(34)-C(33)-C(38) | 117.4(3) |
| C(38)-C(33)-C(20) | 122.4(3) | C(33)-C(34)-H(34) | 118.9    |
| C(35)-C(34)-C(33) | 122.3(3) | C(35)-C(34)-H(34) | 118.9    |
| C(34)-C(35)-H(35) | 119.5    | C(34)-C(35)-C(36) | 120.9(3) |

|                   |          |                   |          |
|-------------------|----------|-------------------|----------|
| C(36)-C(35)-H(35) | 119.5    | C(35)-C(36)-C(39) | 121.8(3) |
| C(37)-C(36)-C(35) | 117.4(3) | C(37)-C(36)-C(39) | 120.7(3) |
| C(36)-C(37)-H(37) | 119.3    | C(36)-C(37)-C(38) | 121.5(3) |
| C(38)-C(37)-H(37) | 119.3    | C(33)-C(38)-C(37) | 120.5(3) |
| C(33)-C(38)-H(38) | 119.8    | C(37)-C(38)-H(38) | 119.8    |
| C(40)-C(39)-C(36) | 120.7(3) | C(44)-C(39)-C(36) | 121.7(3) |
| C(44)-C(39)-C(40) | 117.7(3) | C(39)-C(40)-H(40) | 119.3    |
| C(41)-C(40)-C(39) | 121.4(4) | C(41)-C(40)-H(40) | 119.3    |
| C(40)-C(41)-H(41) | 119.8    | C(42)-C(41)-C(40) | 120.4(4) |
| C(42)-C(41)-H(41) | 119.8    | C(41)-C(42)-H(42) | 120.5    |
| C(41)-C(42)-C(43) | 119.0(3) | C(43)-C(42)-H(42) | 120.5    |
| C(42)-C(43)-H(43) | 119.8    | C(44)-C(43)-C(42) | 120.3(4) |
| C(44)-C(43)-H(43) | 119.8    | C(39)-C(44)-H(44) | 119.4    |
| C(43)-C(44)-C(39) | 121.2(3) | C(43)-C(44)-H(44) | 119.4    |
| C(46)-C(45)-S(1)  | 117.9(2) | C(54)-C(45)-S(1)  | 124.9(3) |
| C(54)-C(45)-C(46) | 117.2(3) | F(1)-C(46)-C(45)  | 119.3(3) |
| F(1)-C(46)-C(47)  | 118.5(3) | C(47)-C(46)-C(45) | 122.2(3) |
| F(2)-C(47)-C(46)  | 118.2(3) | F(2)-C(47)-C(48)  | 120.6(3) |
| C(46)-C(47)-C(48) | 121.2(3) | C(47)-C(48)-C(49) | 123.2(4) |
| C(47)-C(48)-C(53) | 118.4(3) | C(53)-C(48)-C(49) | 118.4(3) |
| F(3)-C(49)-C(48)  | 120.2(3) | F(3)-C(49)-C(50)  | 118.6(4) |
| C(50)-C(49)-C(48) | 121.2(4) | F(4)-C(50)-C(49)  | 119.6(4) |
| F(4)-C(50)-C(51)  | 119.8(4) | C(49)-C(50)-C(51) | 120.6(4) |
| F(5)-C(51)-C(50)  | 119.7(4) | F(5)-C(51)-C(52)  | 120.3(4) |
| C(52)-C(51)-C(50) | 120.0(4) | F(6)-C(52)-C(51)  | 117.9(3) |
| F(6)-C(52)-C(53)  | 121.1(3) | C(51)-C(52)-C(53) | 121.0(4) |
| C(48)-C(53)-C(52) | 118.7(3) | C(48)-C(53)-C(54) | 118.1(3) |
| C(52)-C(53)-C(54) | 123.1(4) | F(7)-C(54)-C(45)  | 120.8(3) |
| F(7)-C(54)-C(53)  | 116.4(3) | C(45)-C(54)-C(53) | 122.8(3) |
| O(5)-C(61)-C(70)  | 117.4(3) | C(62)-C(61)-O(5)  | 117.4(3) |
| C(62)-C(61)-C(70) | 125.2(3) | C(61)-C(62)-C(63) | 118.3(3) |
| C(61)-C(62)-C(72) | 120.5(3) | C(63)-C(62)-C(72) | 120.9(3) |
| C(64)-C(63)-C(62) | 123.6(3) | C(64)-C(63)-C(68) | 117.9(3) |
| C(68)-C(63)-C(62) | 118.4(3) | C(63)-C(64)-H(64) | 119.3    |
| C(65)-C(64)-C(63) | 121.4(3) | C(65)-C(64)-H(64) | 119.3    |
| C(64)-C(65)-H(65) | 119.8    | C(64)-C(65)-C(66) | 120.5(3) |
| C(66)-C(65)-H(65) | 119.8    | C(65)-C(66)-H(66) | 119.9    |
| C(67)-C(66)-C(65) | 120.3(3) | C(67)-C(66)-H(66) | 119.9    |
| C(66)-C(67)-H(67) | 120.0    | C(66)-C(67)-C(68) | 120.0(3) |

|                   |          |                   |          |
|-------------------|----------|-------------------|----------|
| C(68)-C(67)-H(67) | 120.0    | C(67)-C(68)-C(63) | 119.9(3) |
| C(67)-C(68)-C(69) | 120.4(3) | C(69)-C(68)-C(63) | 119.6(3) |
| C(68)-C(69)-H(69) | 118.7    | C(70)-C(69)-C(68) | 122.6(3) |
| C(70)-C(69)-H(69) | 118.7    | C(61)-C(70)-C(81) | 123.9(3) |
| C(69)-C(70)-C(61) | 115.7(3) | C(69)-C(70)-C(81) | 120.3(3) |
| C(72)-C(71)-O(6)  | 118.4(3) | C(72)-C(71)-C(80) | 124.9(3) |
| C(80)-C(71)-O(6)  | 116.7(3) | C(71)-C(72)-C(62) | 119.8(3) |
| C(71)-C(72)-C(73) | 118.1(3) | C(73)-C(72)-C(62) | 122.1(3) |
| C(72)-C(73)-C(78) | 118.3(3) | C(74)-C(73)-C(72) | 123.2(3) |
| C(74)-C(73)-C(78) | 118.5(3) | C(73)-C(74)-H(74) | 119.5    |
| C(75)-C(74)-C(73) | 120.9(3) | C(75)-C(74)-H(74) | 119.5    |
| C(74)-C(75)-H(75) | 119.6    | C(74)-C(75)-C(76) | 120.9(3) |
| C(76)-C(75)-H(75) | 119.6    | C(75)-C(76)-H(76) | 119.8    |
| C(77)-C(76)-C(75) | 120.5(3) | C(77)-C(76)-H(76) | 119.8    |
| C(76)-C(77)-H(77) | 120.0    | C(76)-C(77)-C(78) | 120.1(3) |
| C(78)-C(77)-H(77) | 120.0    | C(73)-C(78)-C(77) | 119.2(3) |
| C(79)-C(78)-C(73) | 120.0(3) | C(79)-C(78)-C(77) | 120.8(3) |
| C(78)-C(79)-H(79) | 119.0    | C(80)-C(79)-C(78) | 122.0(3) |
| C(80)-C(79)-H(79) | 119.0    | C(71)-C(80)-C(93) | 121.6(3) |
| C(79)-C(80)-C(71) | 116.2(3) | C(79)-C(80)-C(93) | 122.2(3) |
| C(82)-C(81)-C(70) | 123.2(3) | C(82)-C(81)-C(86) | 118.2(3) |
| C(86)-C(81)-C(70) | 118.7(3) | C(81)-C(82)-H(82) | 119.9    |
| C(81)-C(82)-C(83) | 120.3(3) | C(83)-C(82)-H(82) | 119.9    |
| C(82)-C(83)-H(83) | 119.2    | C(84)-C(83)-C(82) | 121.6(4) |
| C(84)-C(83)-H(83) | 119.2    | C(83)-C(84)-C(85) | 118.1(3) |
| C(83)-C(84)-C(87) | 121.8(3) | C(85)-C(84)-C(87) | 120.1(3) |
| C(84)-C(85)-H(85) | 119.7    | C(86)-C(85)-C(84) | 120.6(3) |
| C(86)-C(85)-H(85) | 119.7    | C(81)-C(86)-H(86) | 119.4    |
| C(85)-C(86)-C(81) | 121.3(3) | C(85)-C(86)-H(86) | 119.4    |
| C(88)-C(87)-C(84) | 120.7(3) | C(92)-C(87)-C(84) | 121.7(3) |
| C(92)-C(87)-C(88) | 117.4(3) | C(87)-C(88)-H(88) | 119.6    |
| C(89)-C(88)-C(87) | 120.8(4) | C(89)-C(88)-H(88) | 119.6    |
| C(88)-C(89)-H(89) | 119.2    | C(90)-C(89)-C(88) | 121.7(4) |
| C(90)-C(89)-H(89) | 119.2    | C(89)-C(90)-H(90) | 120.7    |
| C(89)-C(90)-C(91) | 118.6(4) | C(91)-C(90)-H(90) | 120.7    |
| C(90)-C(91)-H(91) | 119.9    | C(90)-C(91)-C(92) | 120.2(4) |
| C(92)-C(91)-H(91) | 119.9    | C(87)-C(92)-C(91) | 121.2(4) |
| C(87)-C(92)-H(92) | 119.4    | C(91)-C(92)-H(92) | 119.4    |
| C(94)-C(93)-C(80) | 121.5(3) | C(94)-C(93)-C(98) | 118.3(3) |

|                      |          |                      |          |
|----------------------|----------|----------------------|----------|
| C(98)-C(93)-C(80)    | 120.2(3) | C(93)-C(94)-H(94)    | 119.4    |
| C(93)-C(94)-C(95)    | 121.1(3) | C(95)-C(94)-H(94)    | 119.4    |
| C(94)-C(95)-H(95)    | 119.7    | C(96)-C(95)-C(94)    | 120.6(3) |
| C(96)-C(95)-H(95)    | 119.7    | C(95)-C(96)-C(97)    | 118.6(3) |
| C(95)-C(96)-C(99)    | 120.4(3) | C(97)-C(96)-C(99)    | 121.0(3) |
| C(96)-C(97)-H(97)    | 119.7    | C(98)-C(97)-C(96)    | 120.6(3) |
| C(98)-C(97)-H(97)    | 119.7    | C(93)-C(98)-H(98)    | 119.7    |
| C(97)-C(98)-C(93)    | 120.5(3) | C(97)-C(98)-H(98)    | 119.7    |
| C(100)-C(99)-C(96)   | 121.3(3) | C(104)-C(99)-C(96)   | 120.2(3) |
| C(104)-C(99)-C(100)  | 118.5(3) | C(99)-C(100)-H(100)  | 120.1    |
| C(99)-C(100)-C(101)  | 119.9(4) | C(101)-C(100)-H(100) | 120.1    |
| C(100)-C(101)-H(101) | 119.5    | C(102)-C(101)-C(100) | 121.0(4) |
| C(102)-C(101)-H(101) | 119.5    | C(101)-C(102)-H(102) | 120.2    |
| C(101)-C(102)-C(103) | 119.7(3) | C(103)-C(102)-H(102) | 120.2    |
| C(102)-C(103)-H(103) | 120.3    | C(104)-C(103)-C(102) | 119.4(4) |
| C(104)-C(103)-H(103) | 120.3    | C(99)-C(104)-C(103)  | 121.6(4) |
| C(99)-C(104)-H(104)  | 119.2    | C(103)-C(104)-H(104) | 119.2    |
| C(106)-C(105)-S(2)   | 122.3(3) | C(114)-C(105)-S(2)   | 119.0(3) |
| C(114)-C(105)-C(106) | 118.2(3) | F(8)-C(106)-C(105)   | 121.2(3) |
| F(8)-C(106)-C(107)   | 119.9(3) | C(107)-C(106)-C(105) | 118.8(3) |
| F(9)-C(107)-C(106)   | 116.8(3) | F(9)-C(107)-C(108)   | 120.6(3) |
| C(106)-C(107)-C(108) | 122.6(3) | C(107)-C(108)-C(109) | 122.5(4) |
| C(107)-C(108)-C(113) | 120.0(3) | C(113)-C(108)-C(109) | 117.3(3) |
| F(10)-C(109)-C(108)  | 121.0(4) | F(10)-C(109)-C(110)  | 117.9(4) |
| C(110)-C(109)-C(108) | 121.1(4) | F(11)-C(110)-C(109)  | 122.0(4) |
| F(11)-C(110)-C(111)  | 118.0(4) | C(109)-C(110)-C(111) | 120.0(3) |
| F(12)-C(111)-C(110)  | 119.0(3) | F(12)-C(111)-C(112)  | 120.8(4) |
| C(112)-C(111)-C(110) | 120.2(4) | F(13)-C(112)-C(113)  | 120.7(3) |
| C(111)-C(112)-F(13)  | 117.9(4) | C(111)-C(112)-C(113) | 121.5(4) |
| C(108)-C(113)-C(114) | 116.0(3) | C(112)-C(113)-C(108) | 119.9(4) |
| C(112)-C(113)-C(114) | 124.1(3) | F(14)-C(114)-C(105)  | 119.1(3) |
| F(14)-C(114)-C(113)  | 116.8(3) | C(105)-C(114)-C(113) | 124.1(3) |

---

—

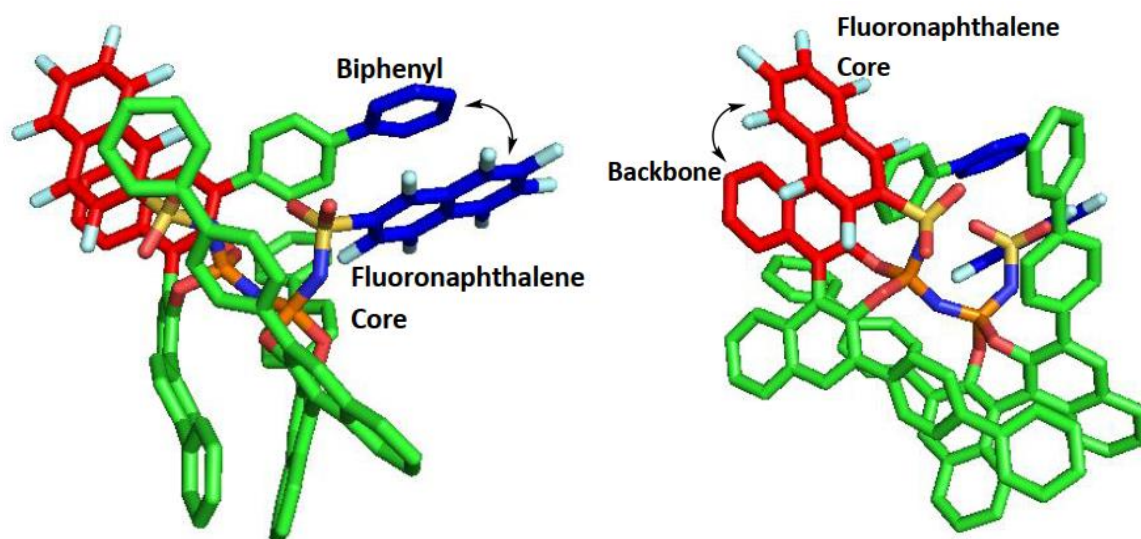

**Figure S7.** Schematic representation (Pymol, Schrödinger) of  $\pi$ - $\pi$  stackings between core & backbone / core & biphenyl of **7c** based on single-crystal X-ray diffraction. For clarity, solvents and hydrogens are omitted.

## 9. NMR spectra

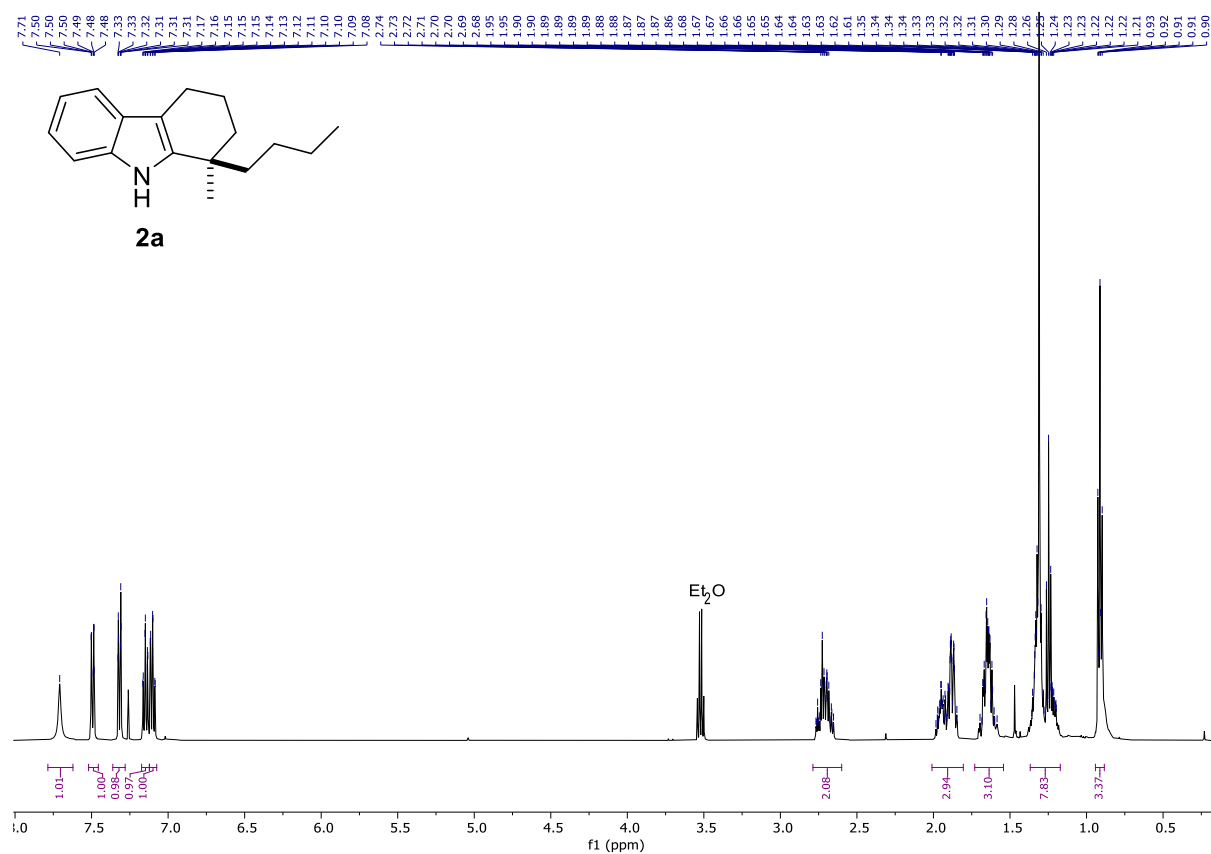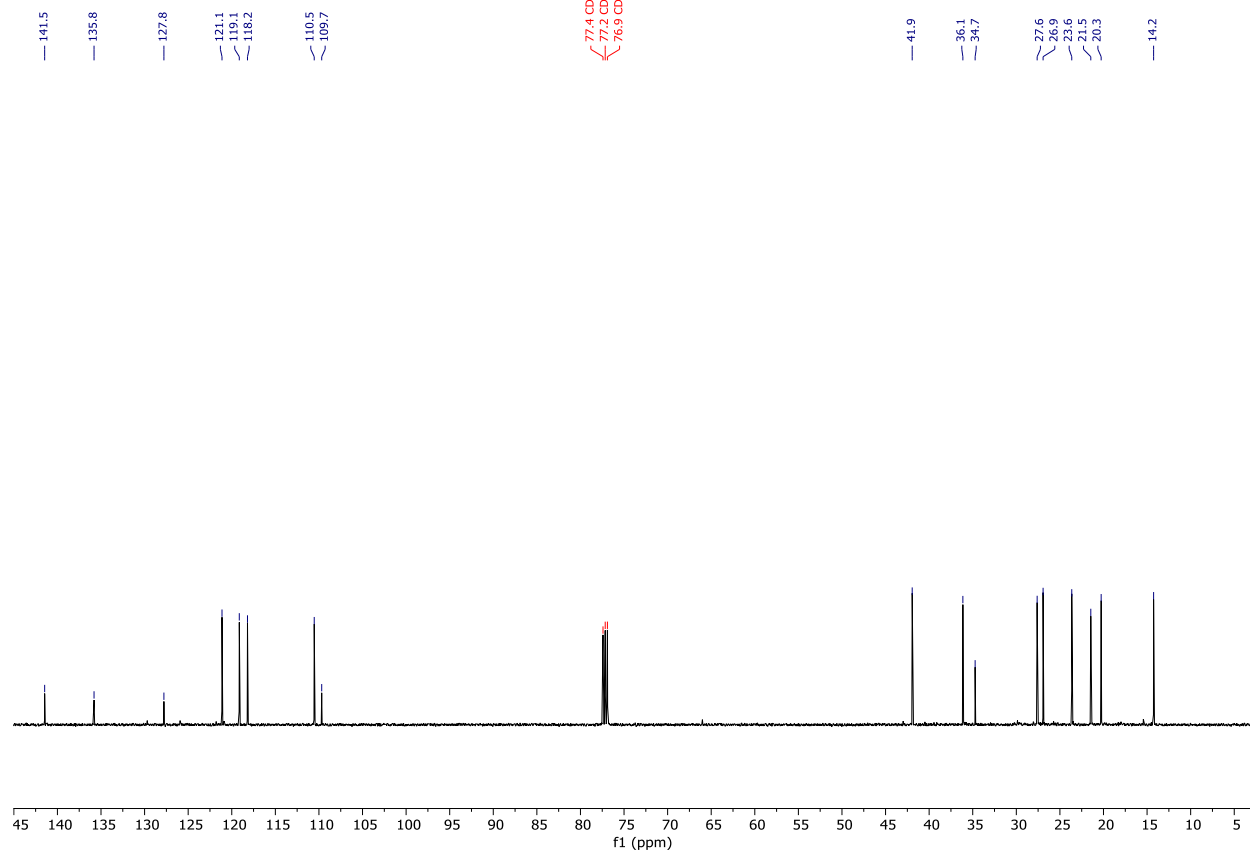

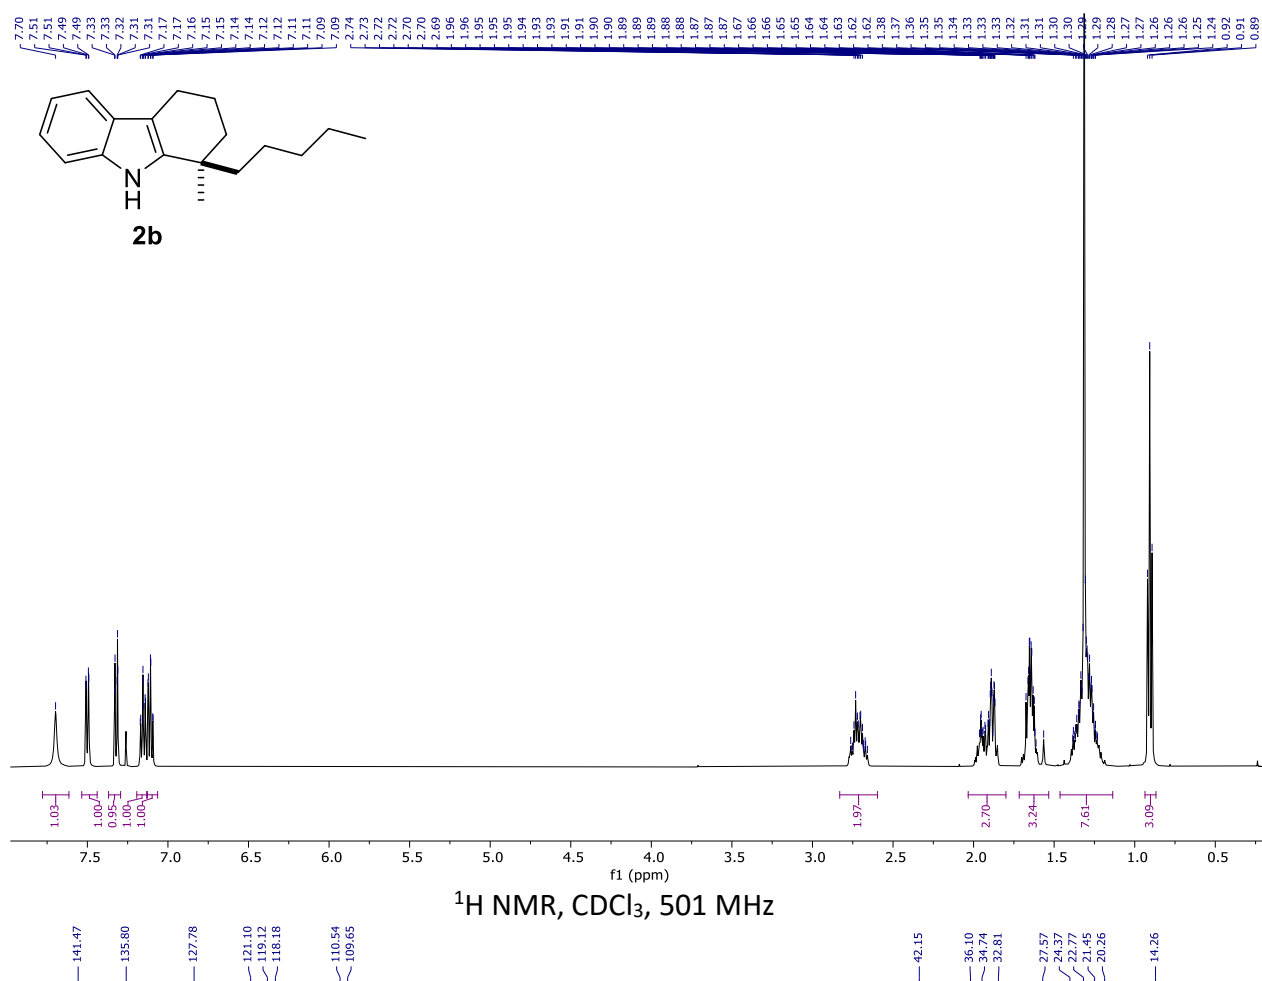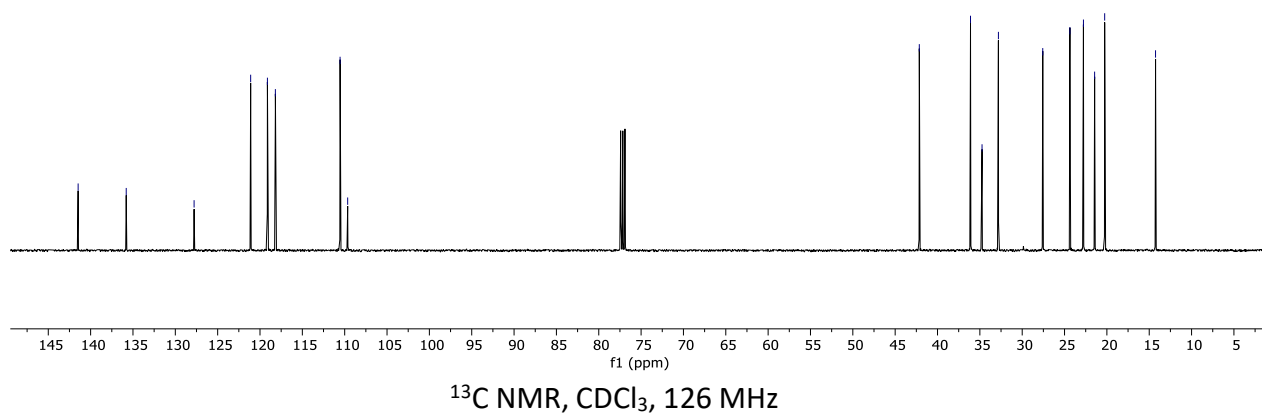

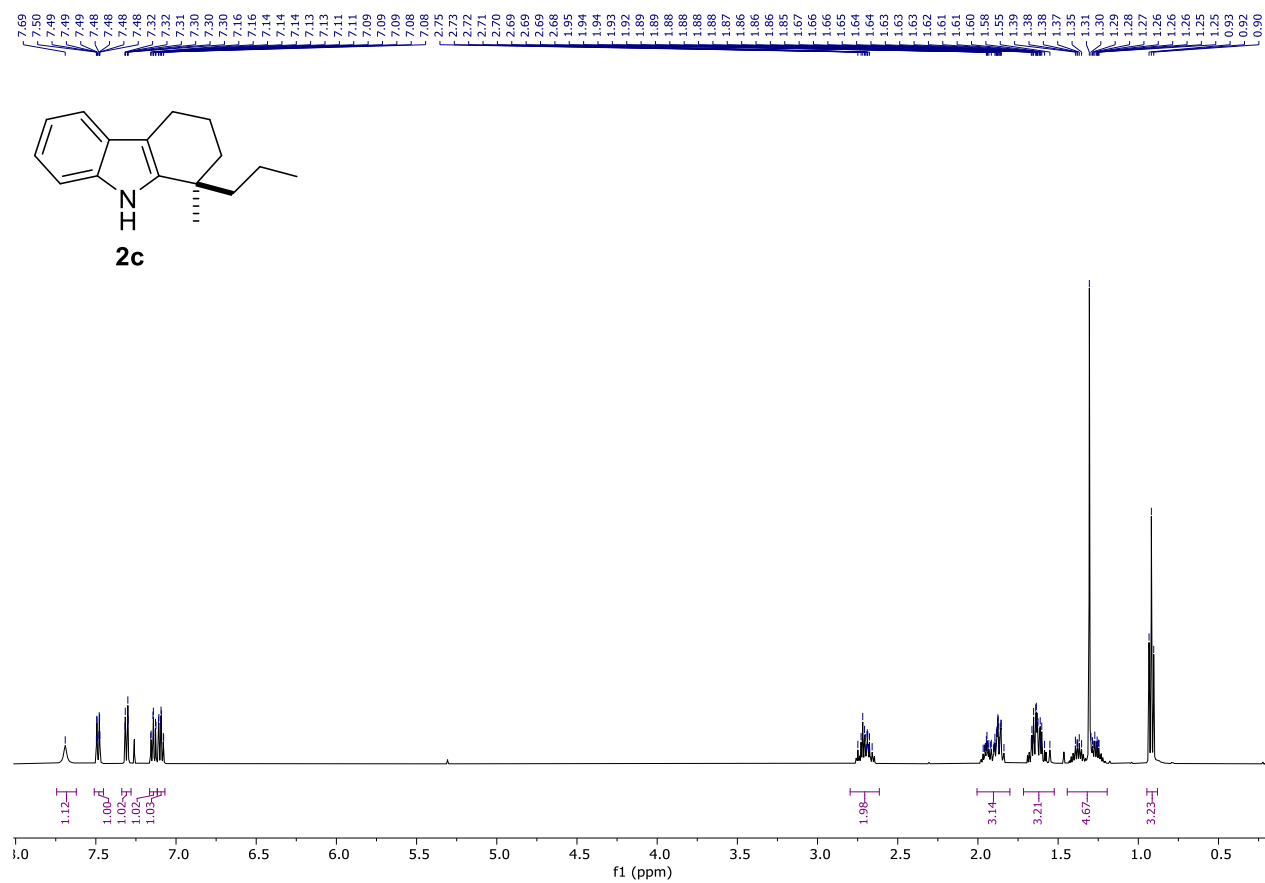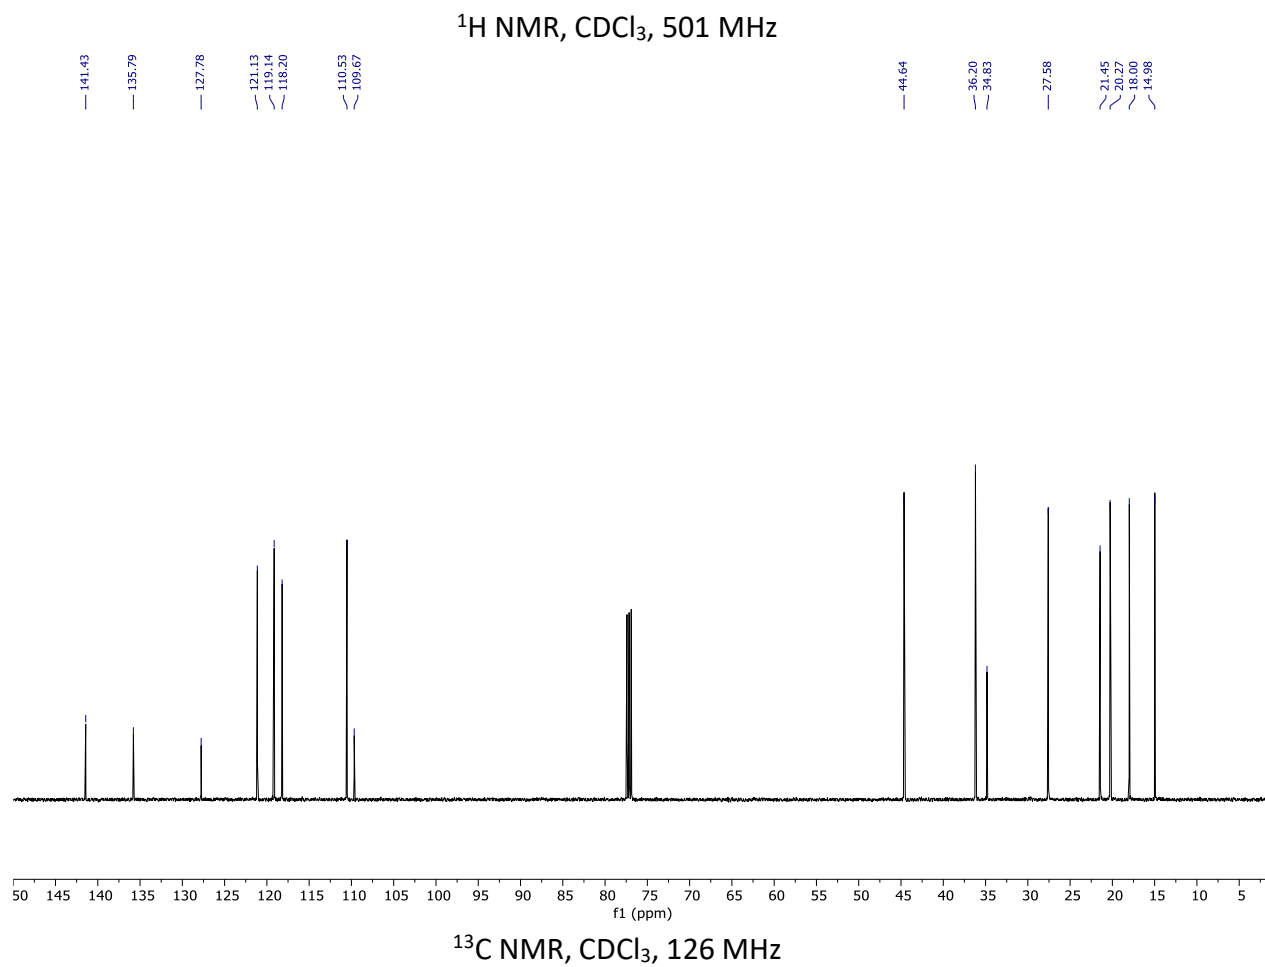

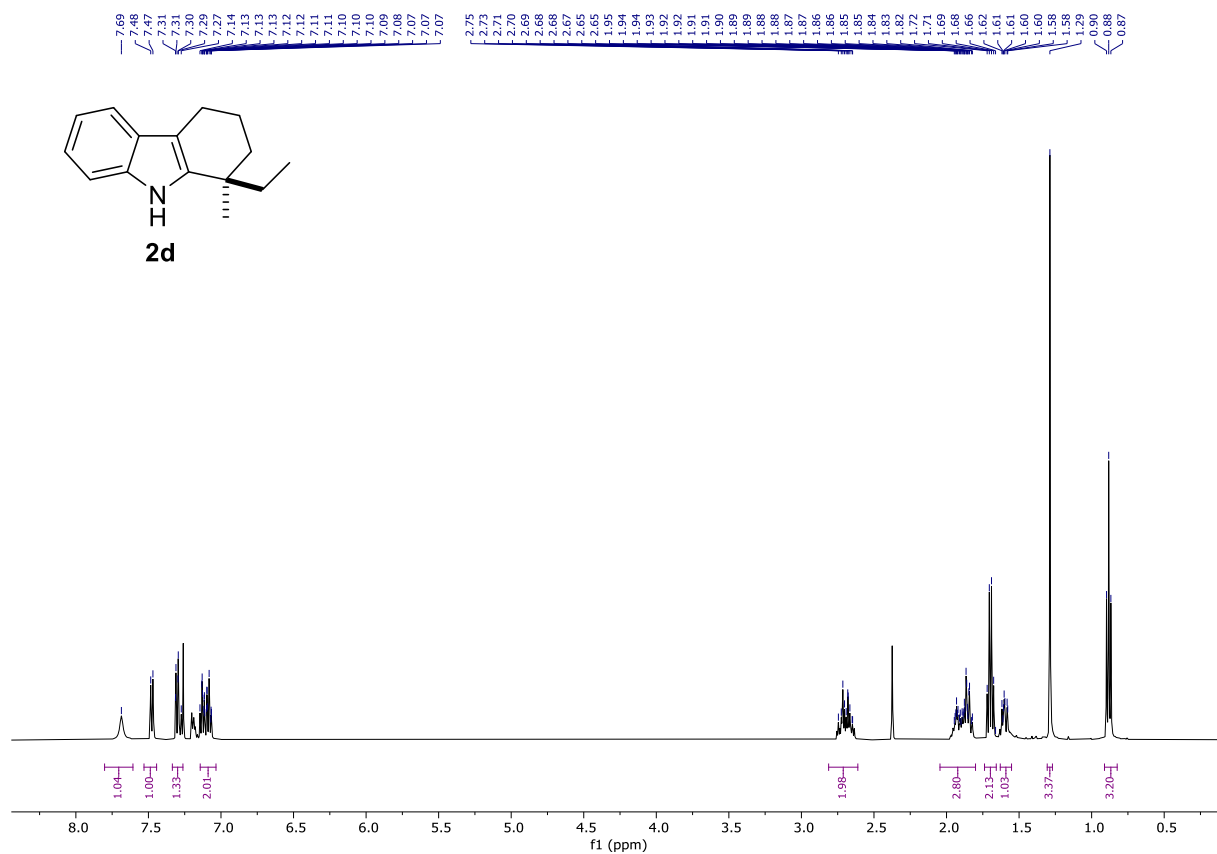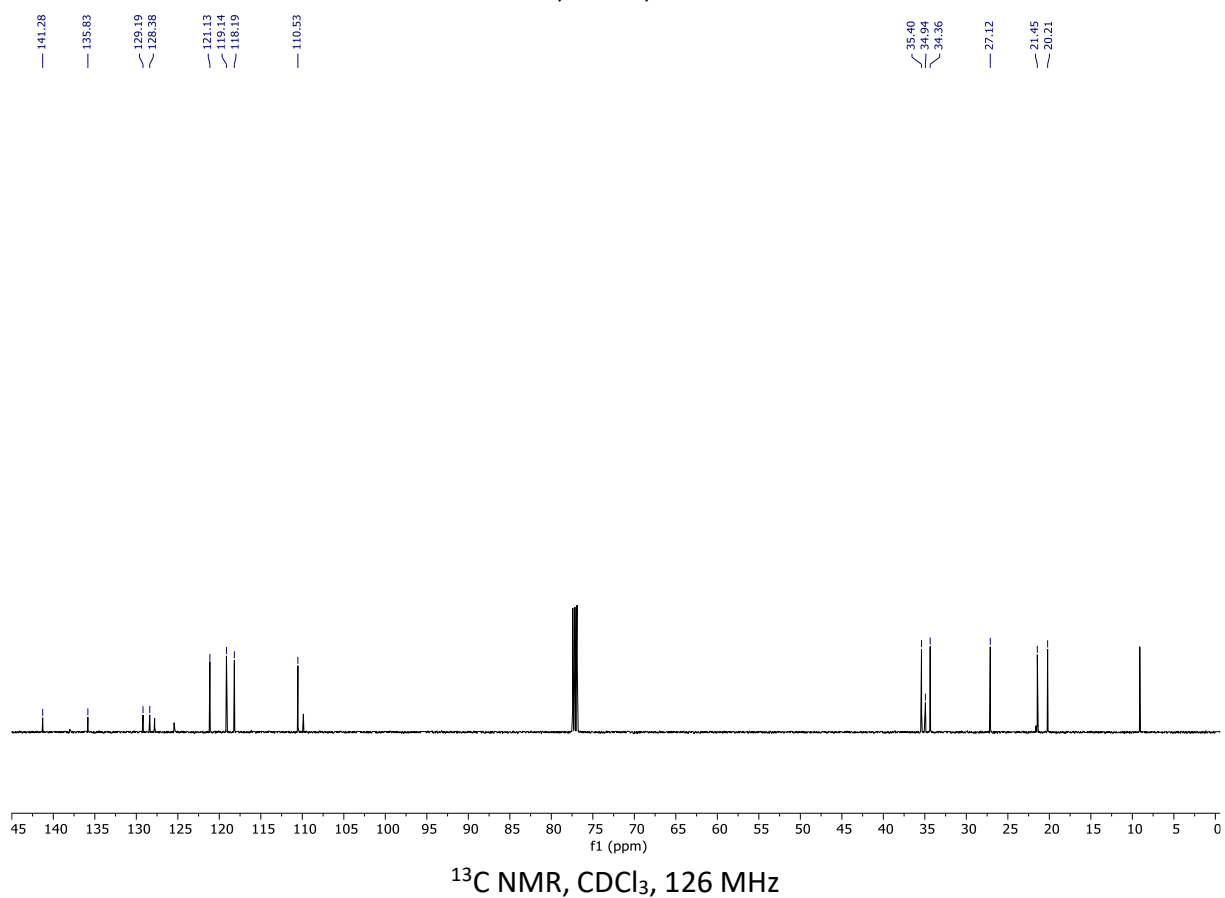

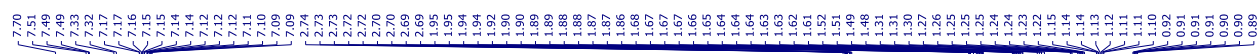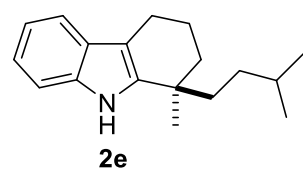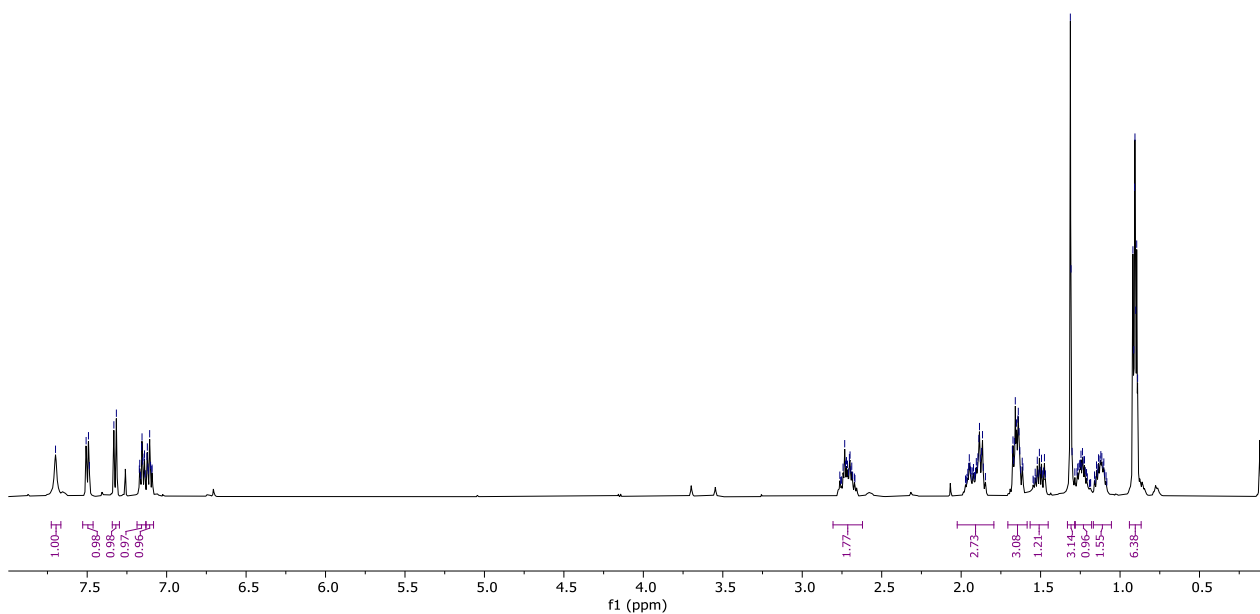

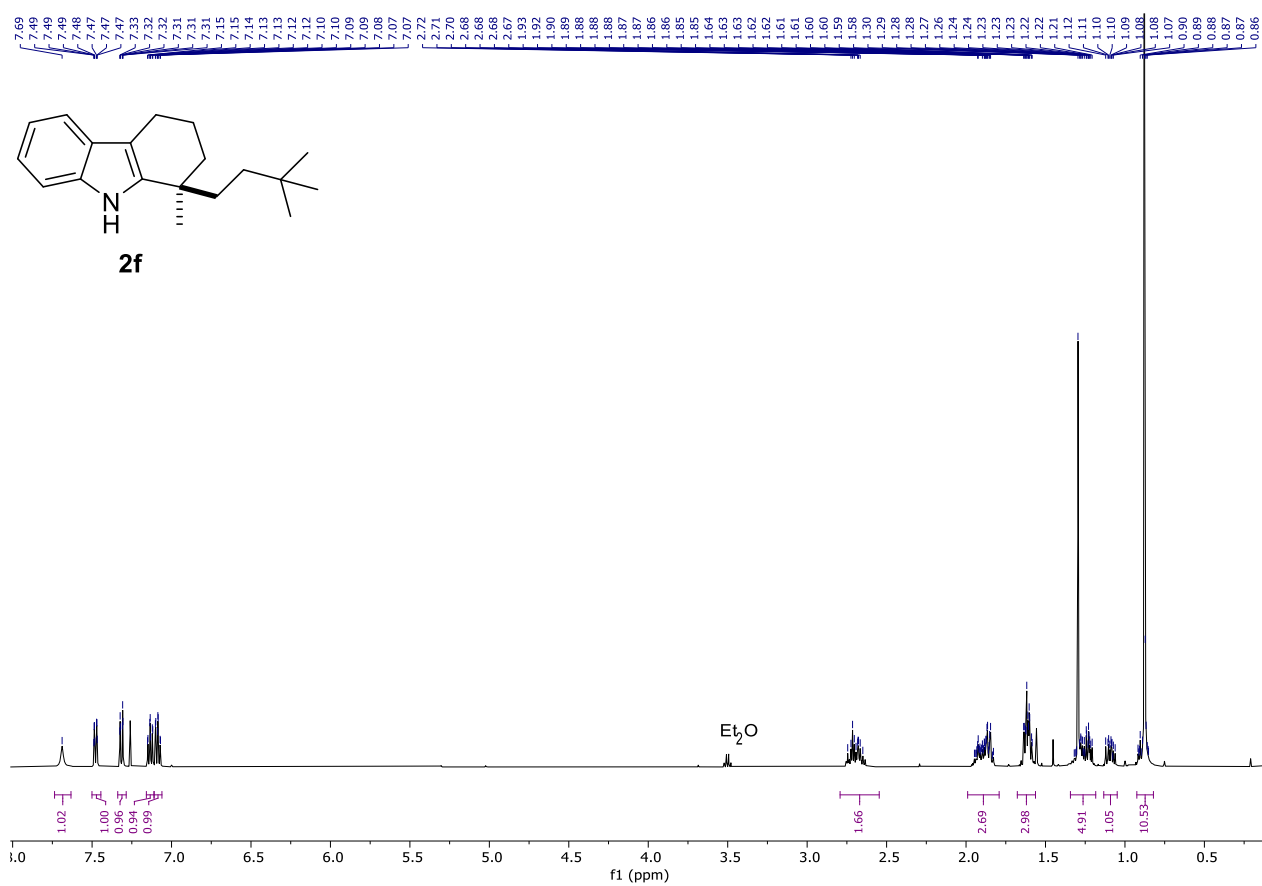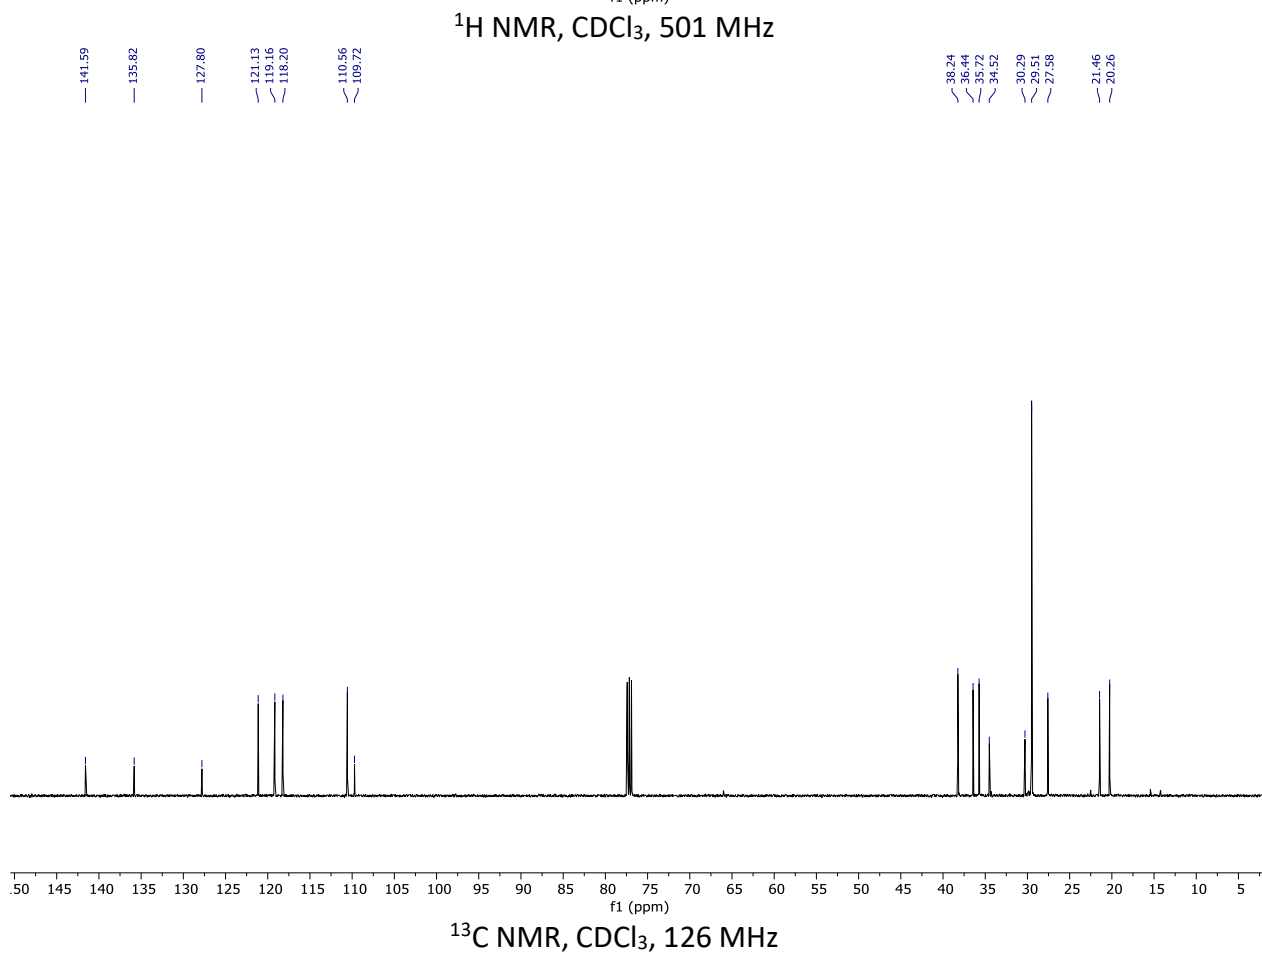

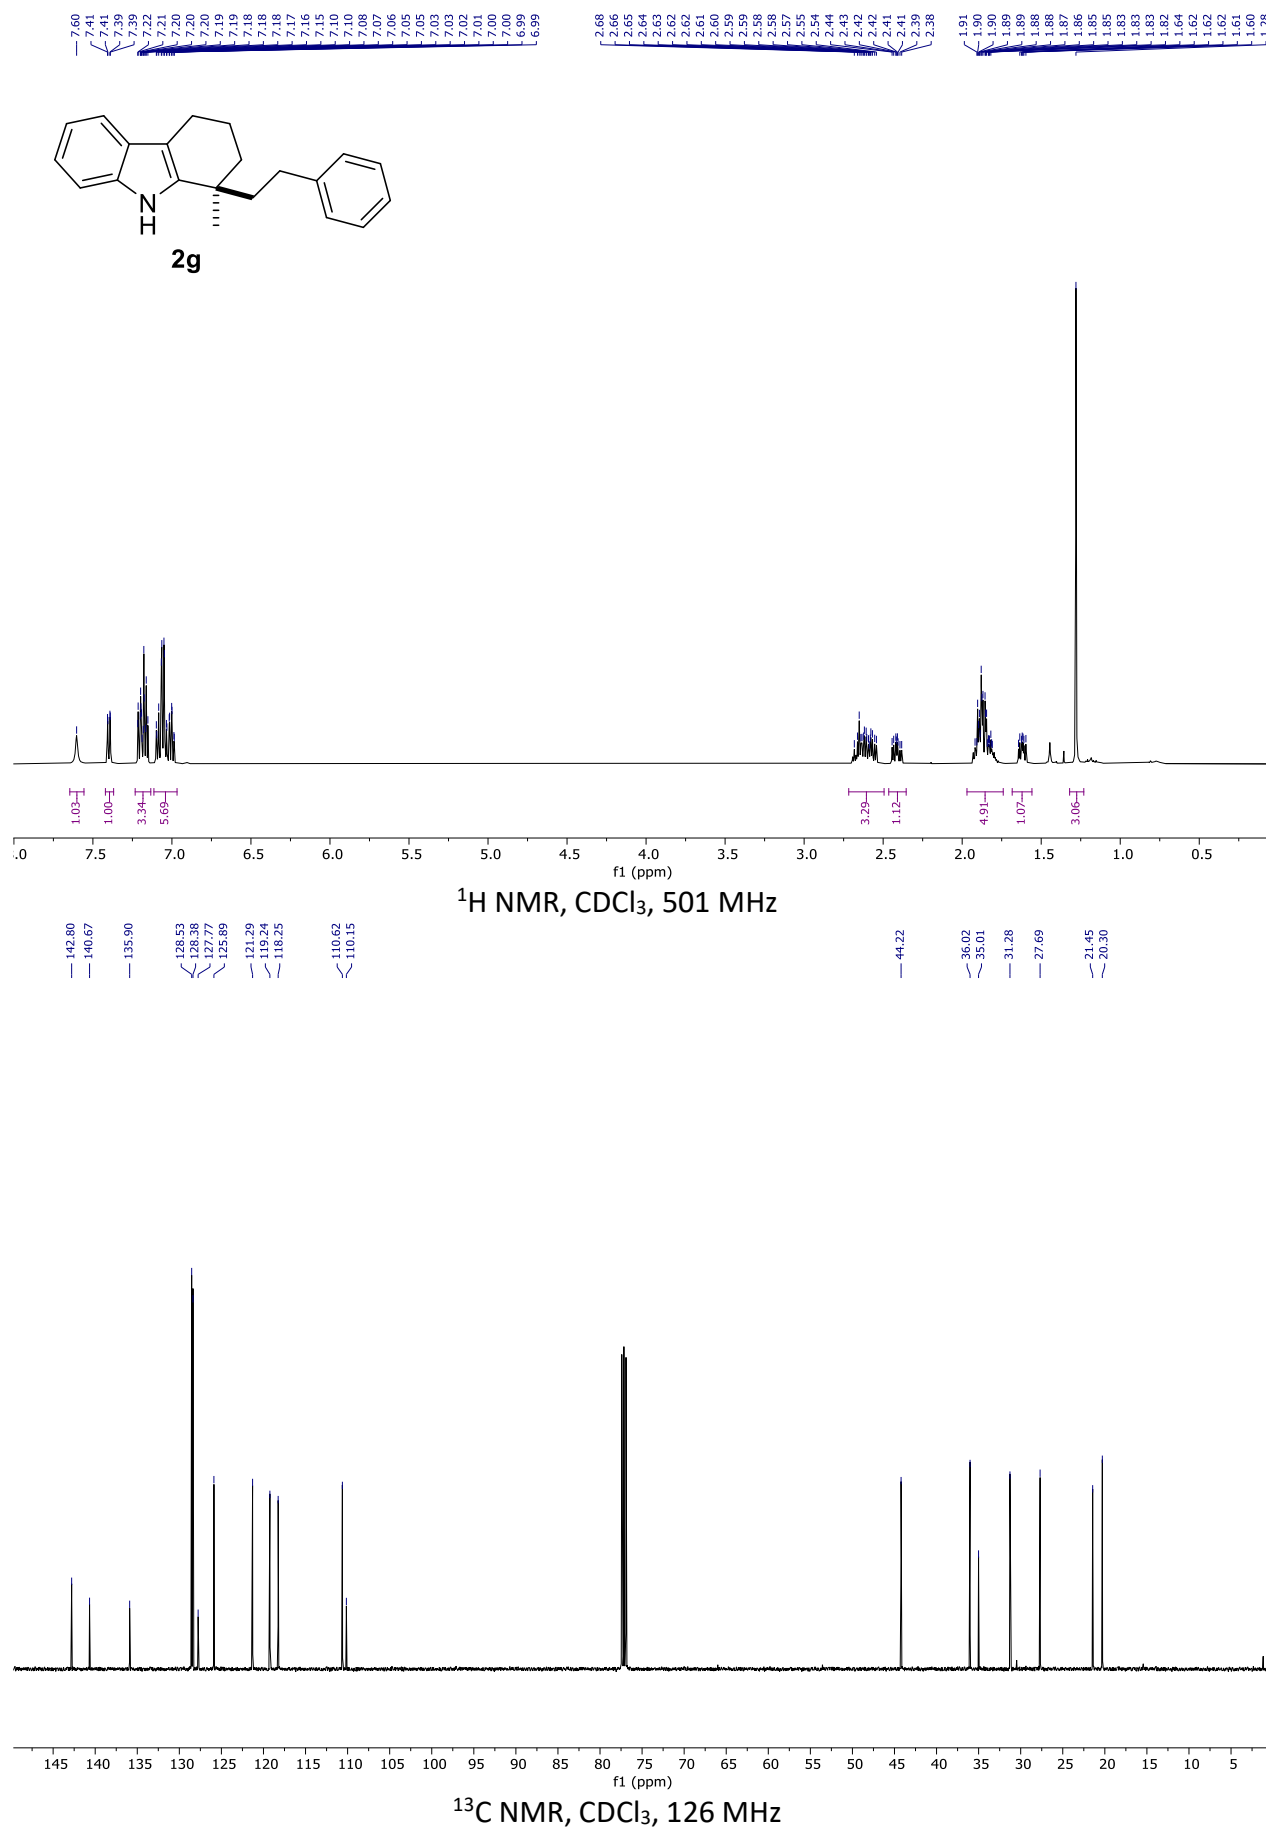

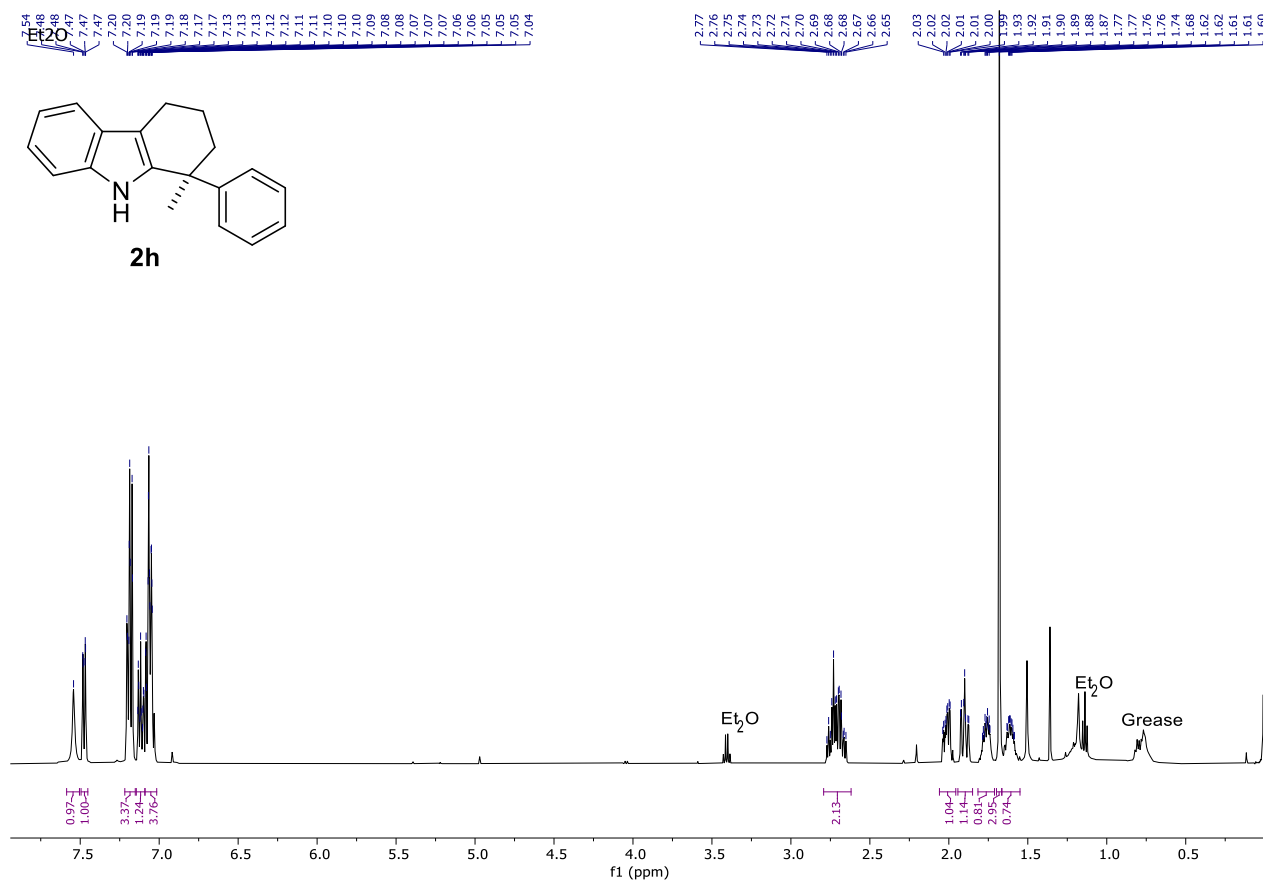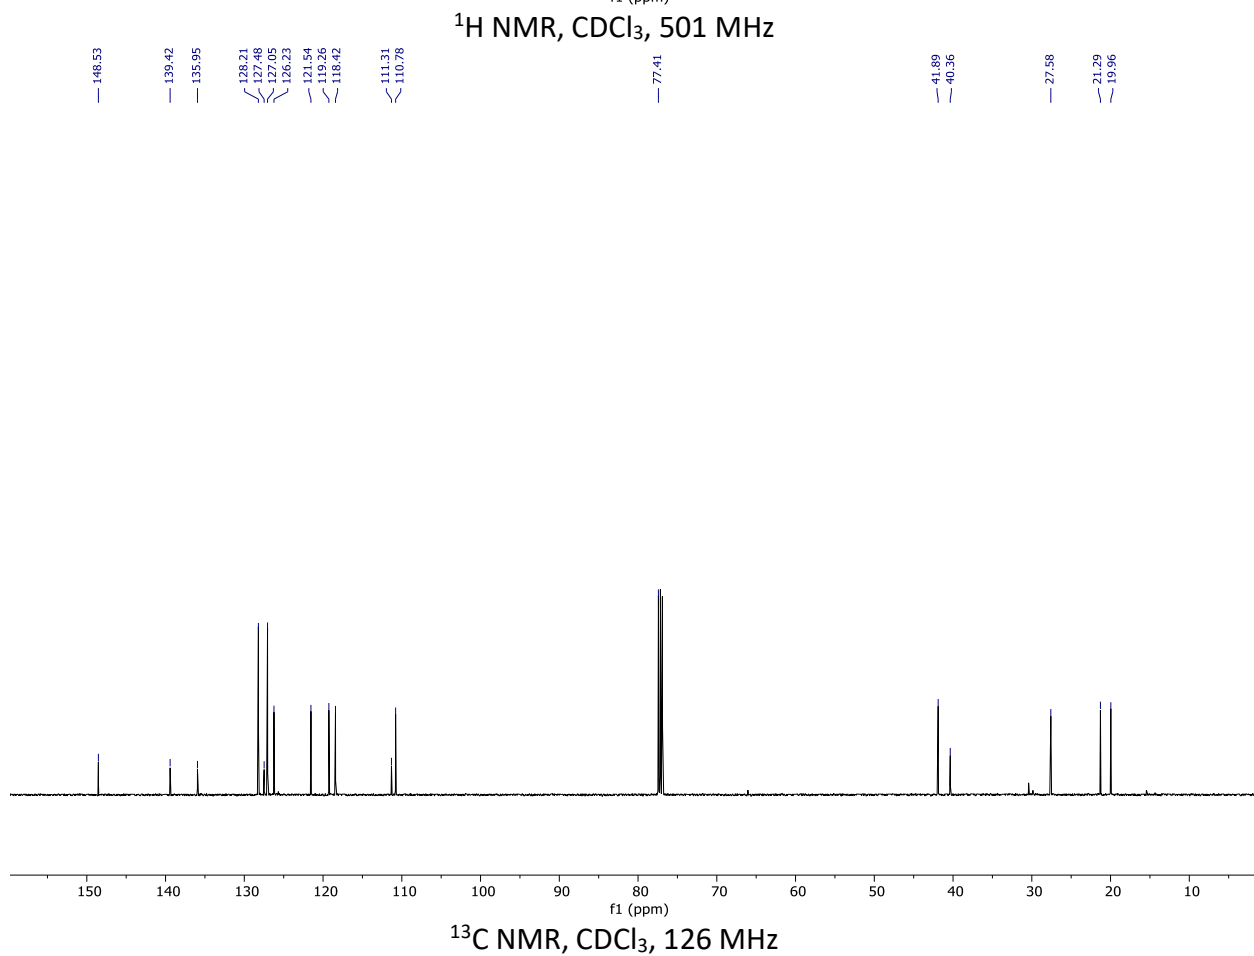

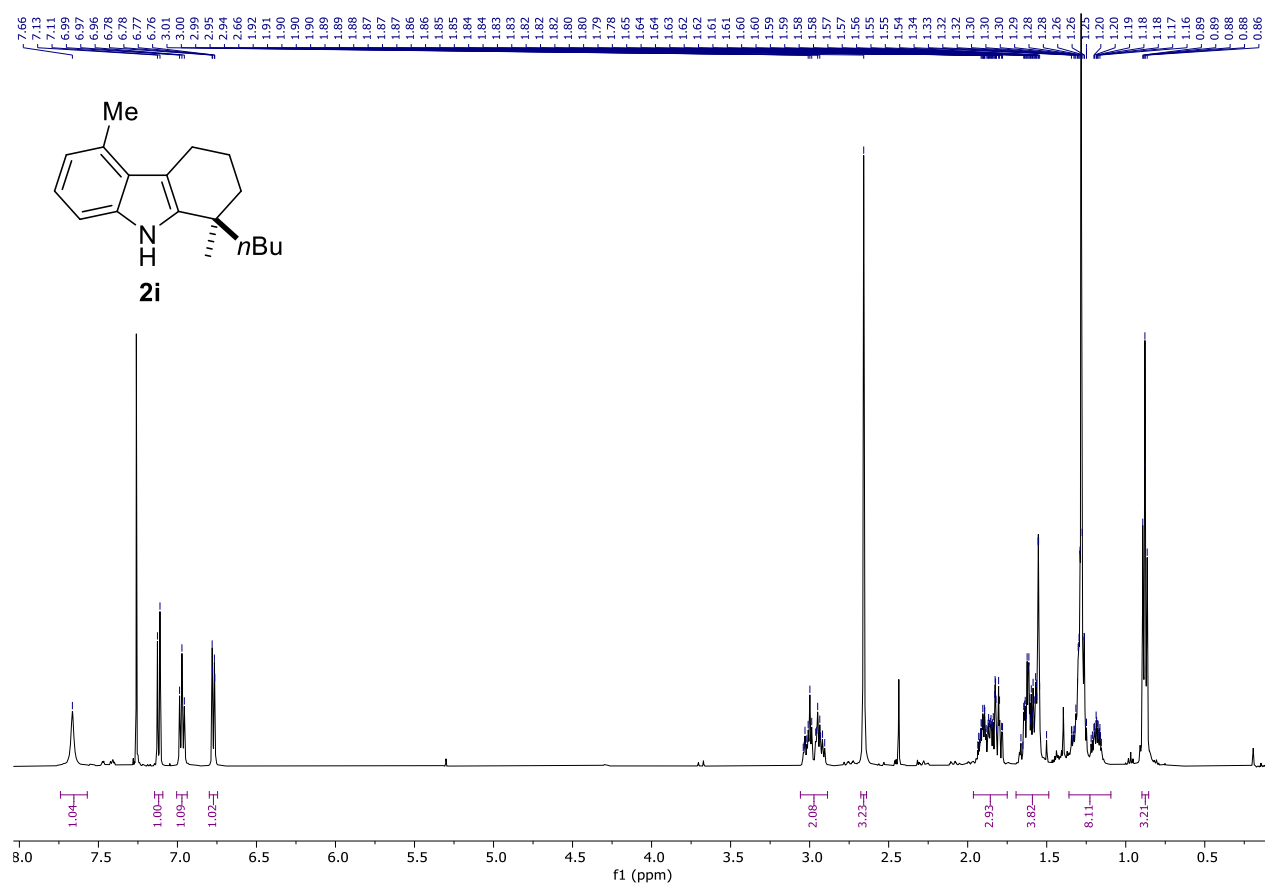

<sup>1</sup>H NMR, CDCl<sub>3</sub>, 501 MHz

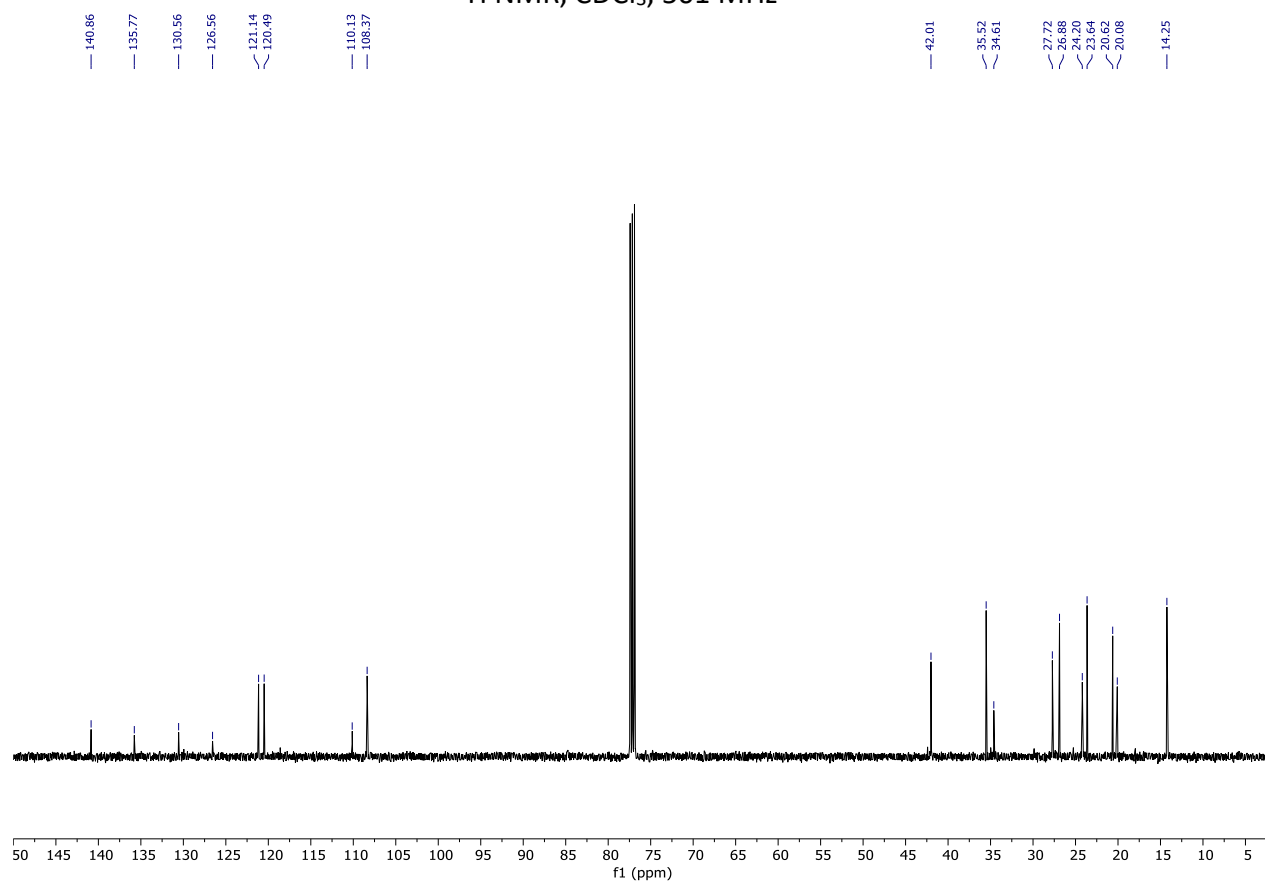

<sup>13</sup>C NMR, CDCl<sub>3</sub>, 126 MHz

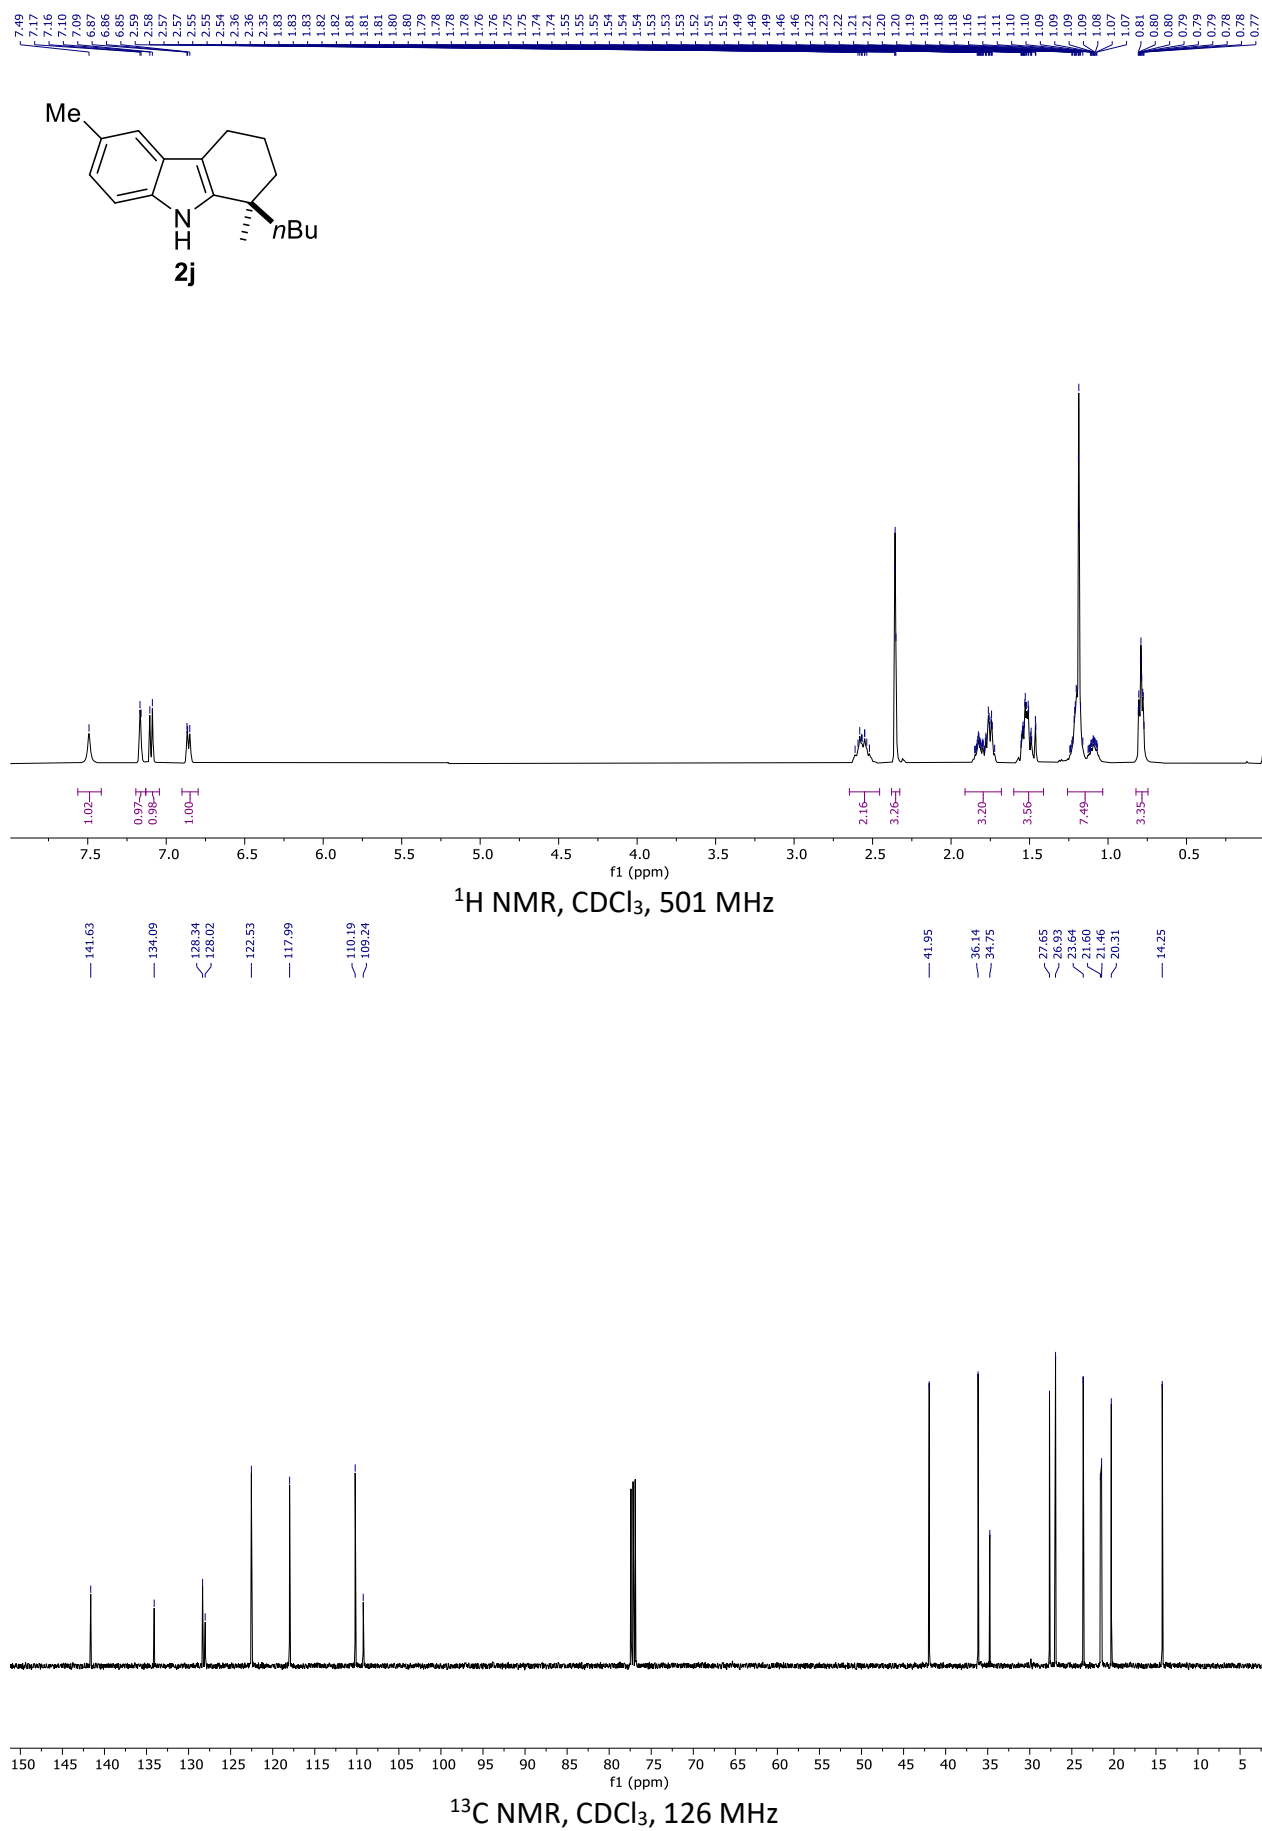

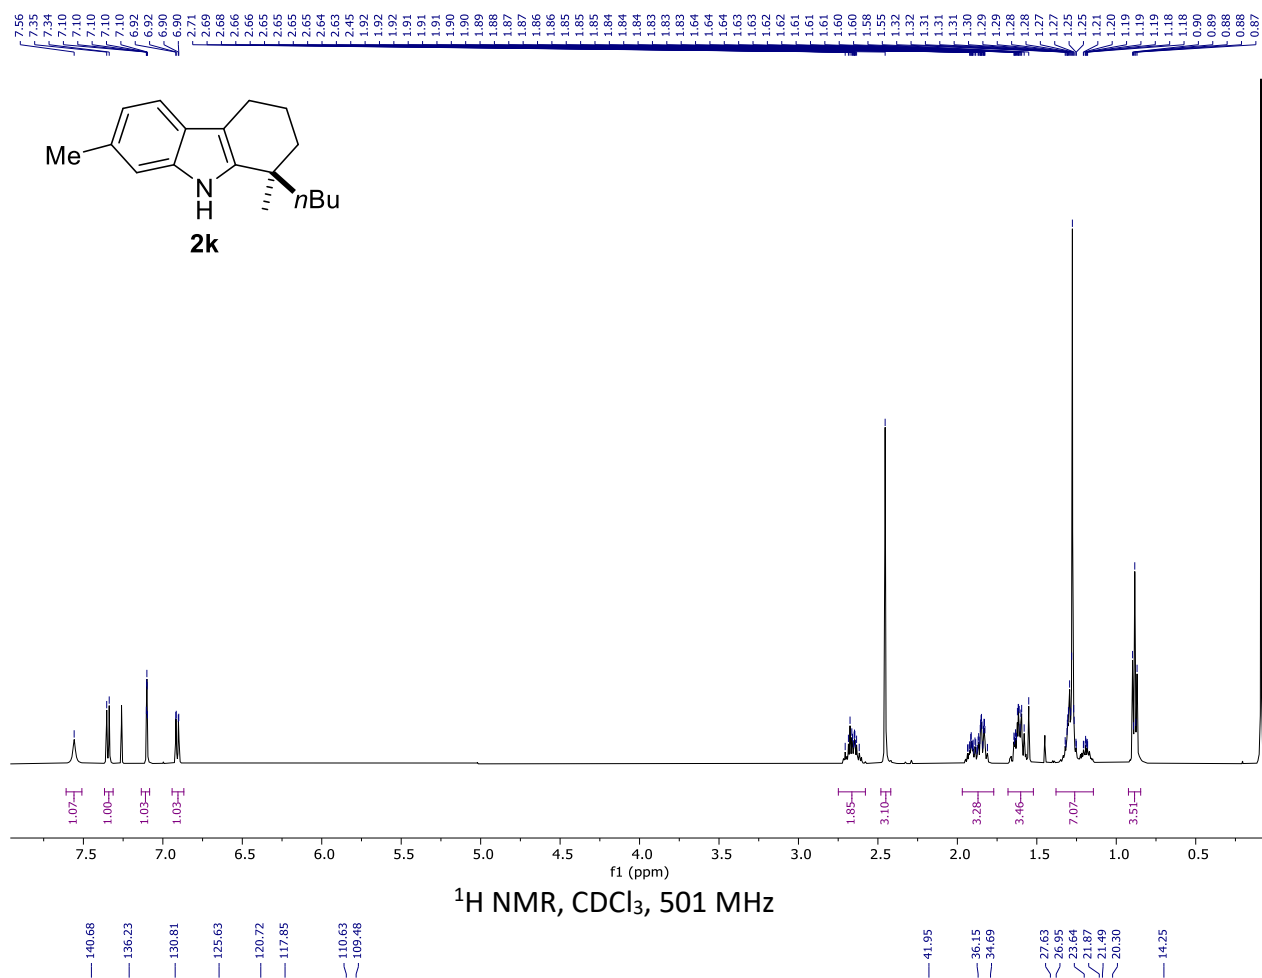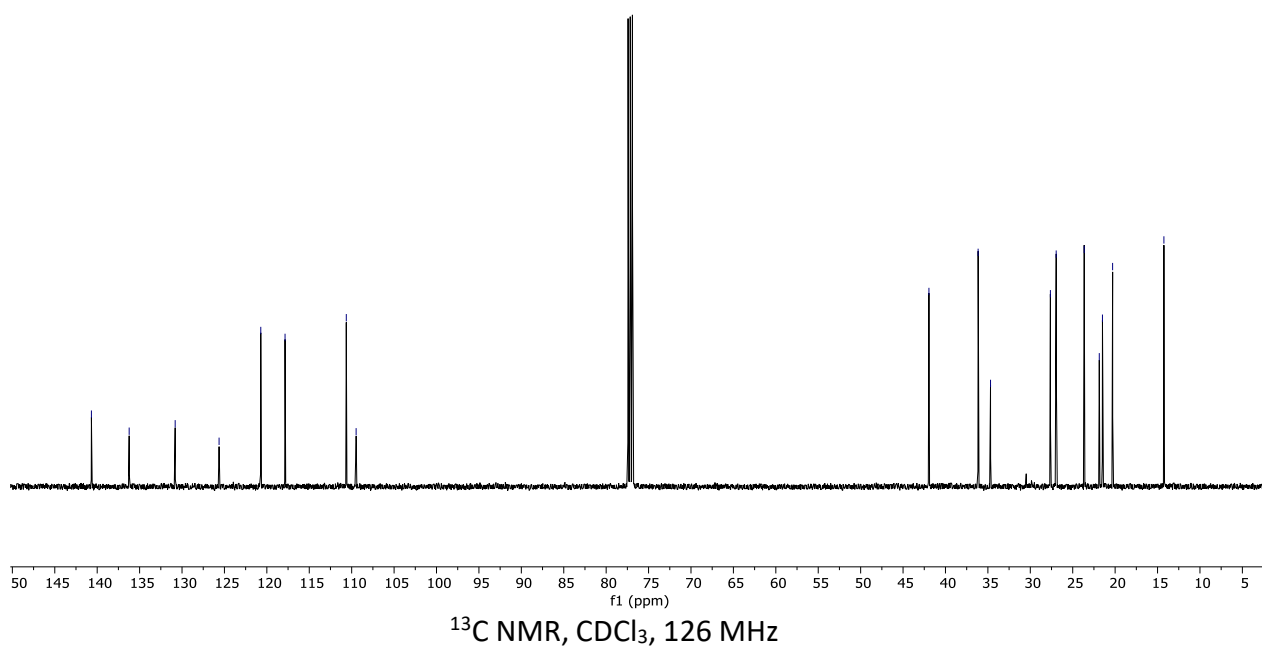

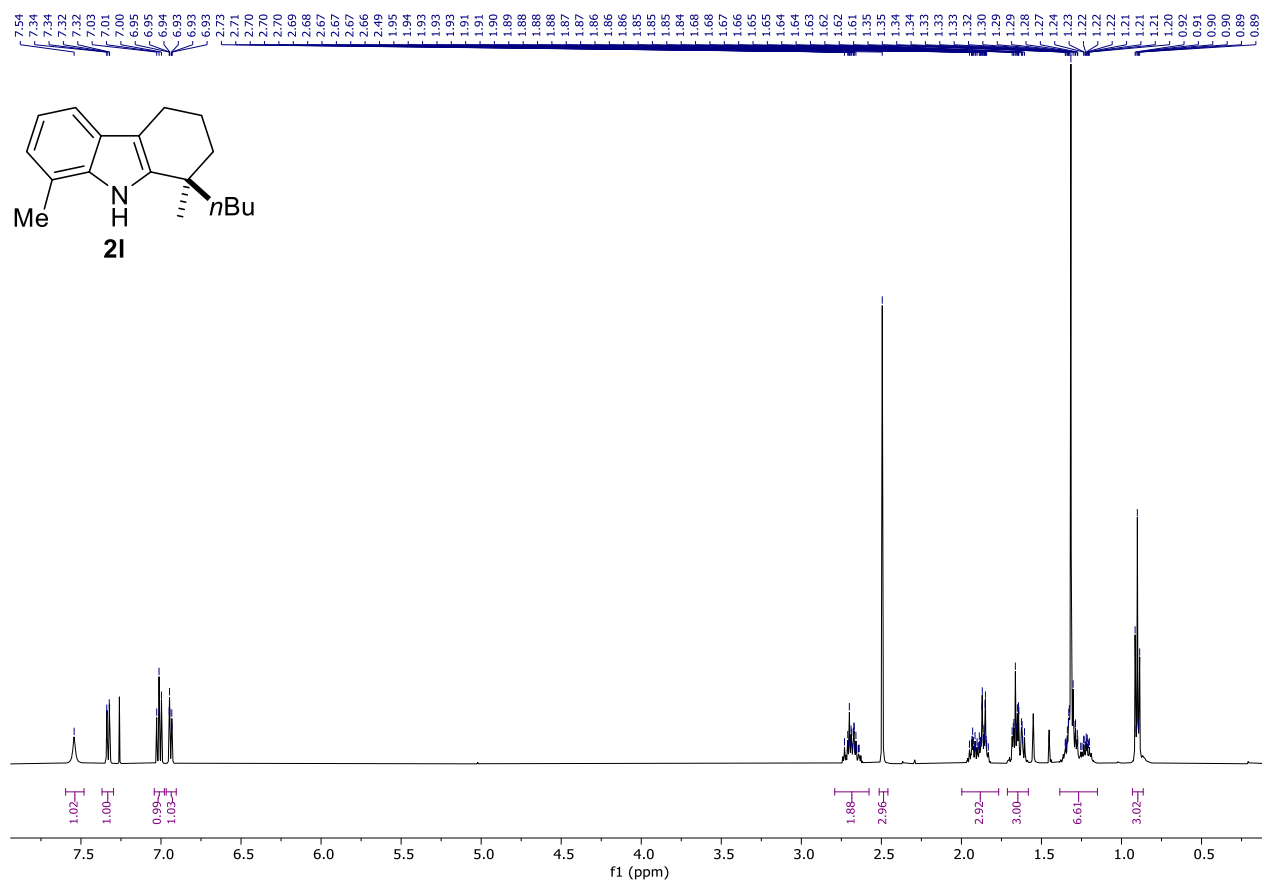

<sup>1</sup>H NMR, CDCl<sub>3</sub>, 501 MHz

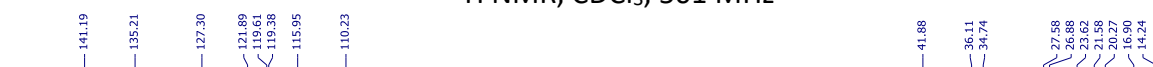

<sup>13</sup>C NMR, CDCl<sub>3</sub>, 126 MHz

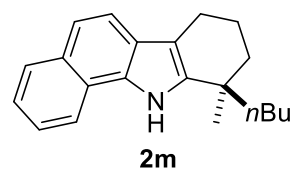<sup>1</sup>H NMR, CDCl<sub>3</sub>, 501 MHz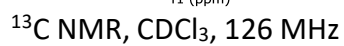

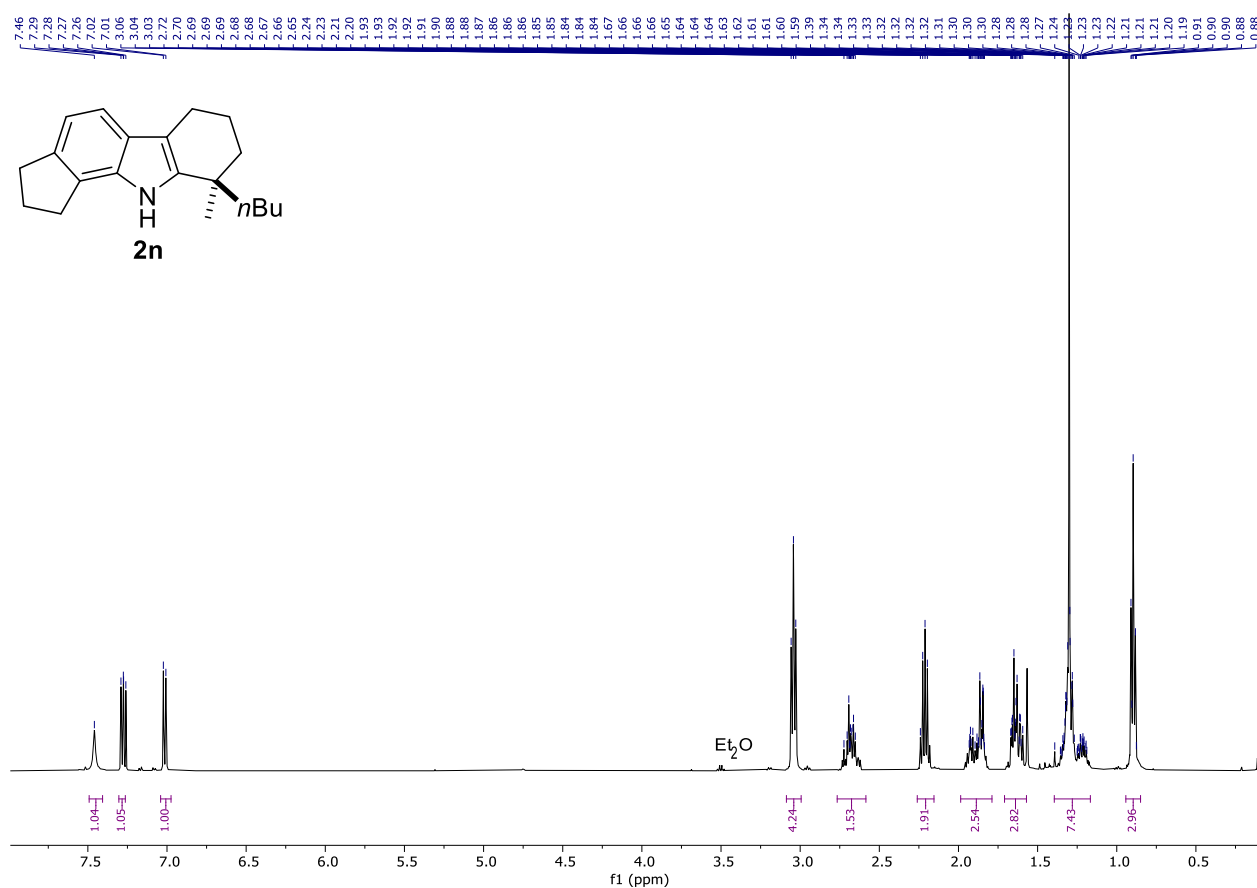

**<sup>1</sup>H NMR, CDCl<sub>3</sub>, 501 MHz**

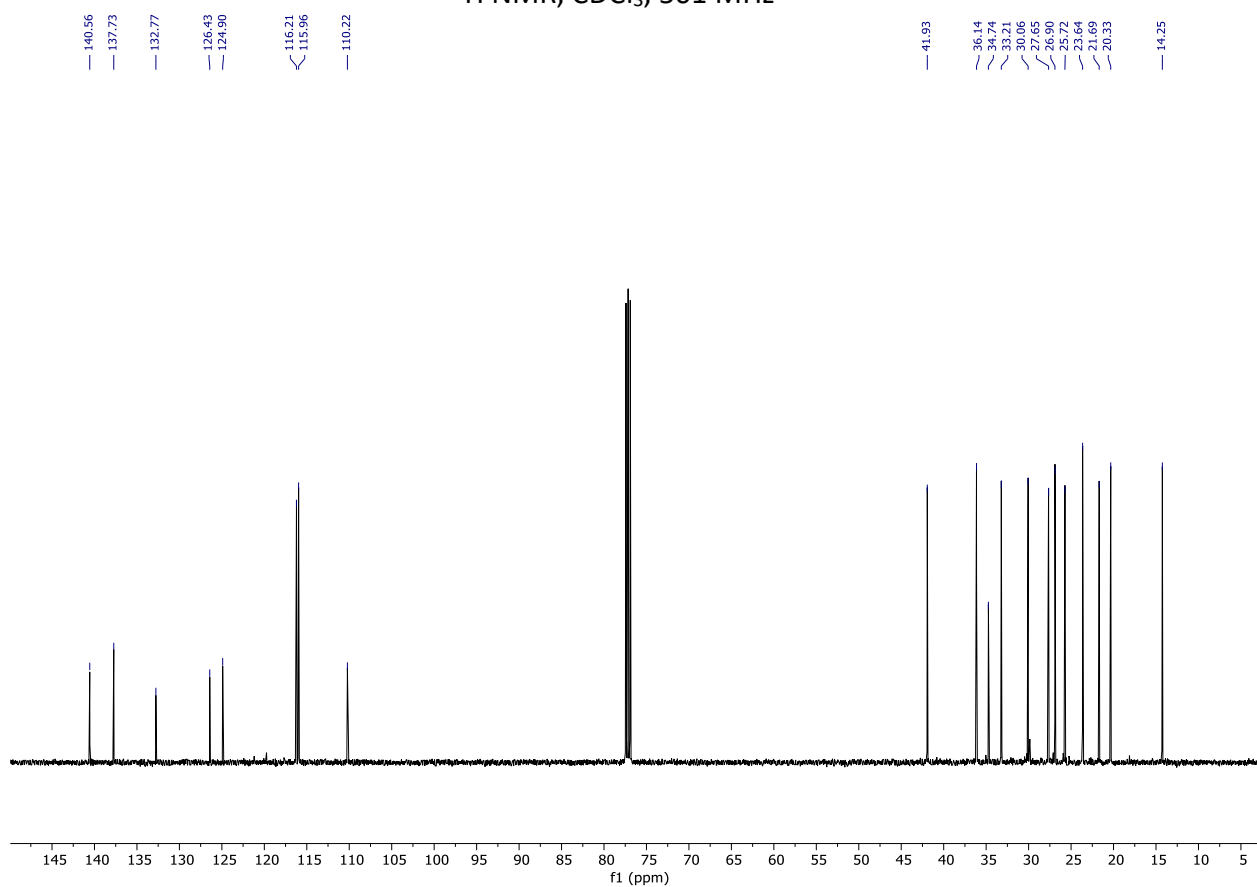

**<sup>13</sup>C NMR, CDCl<sub>3</sub>, 126 MHz**

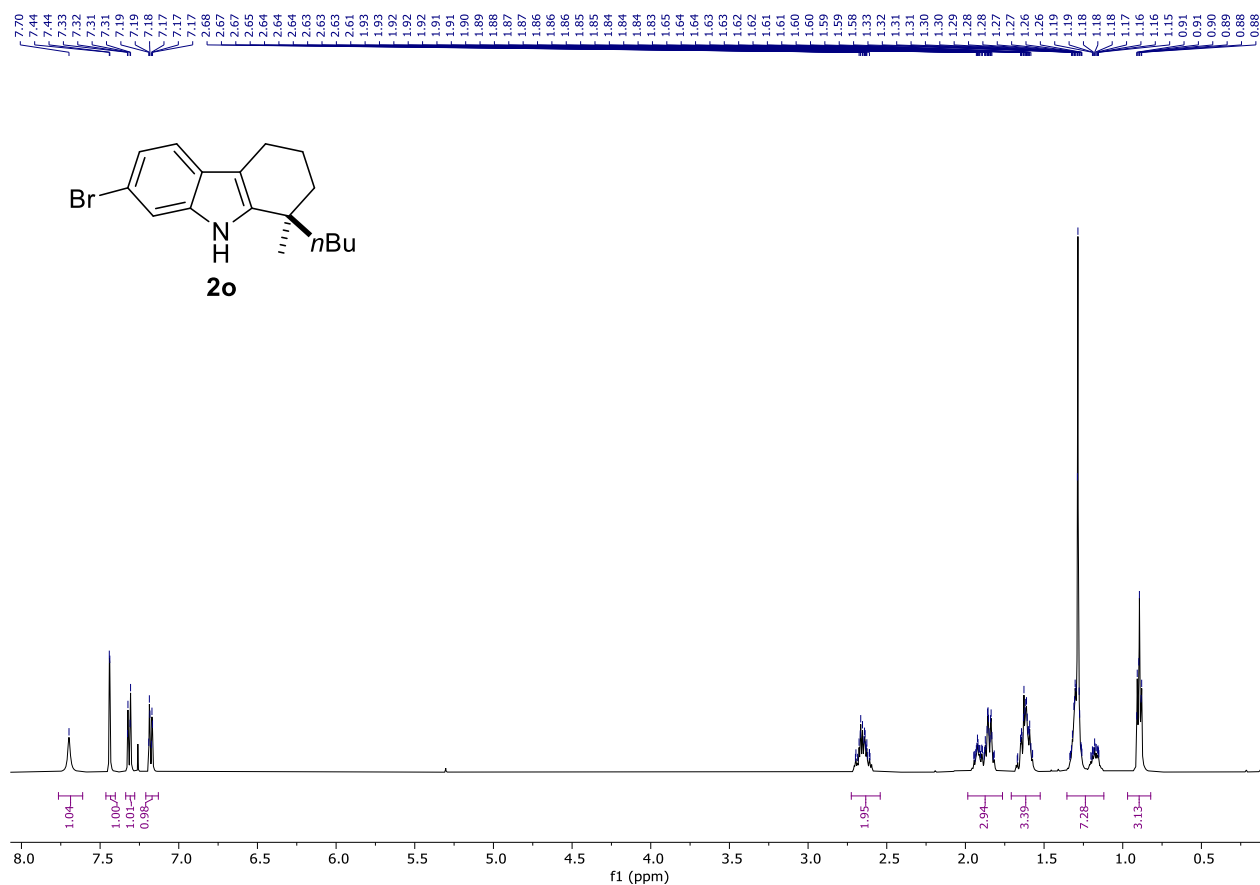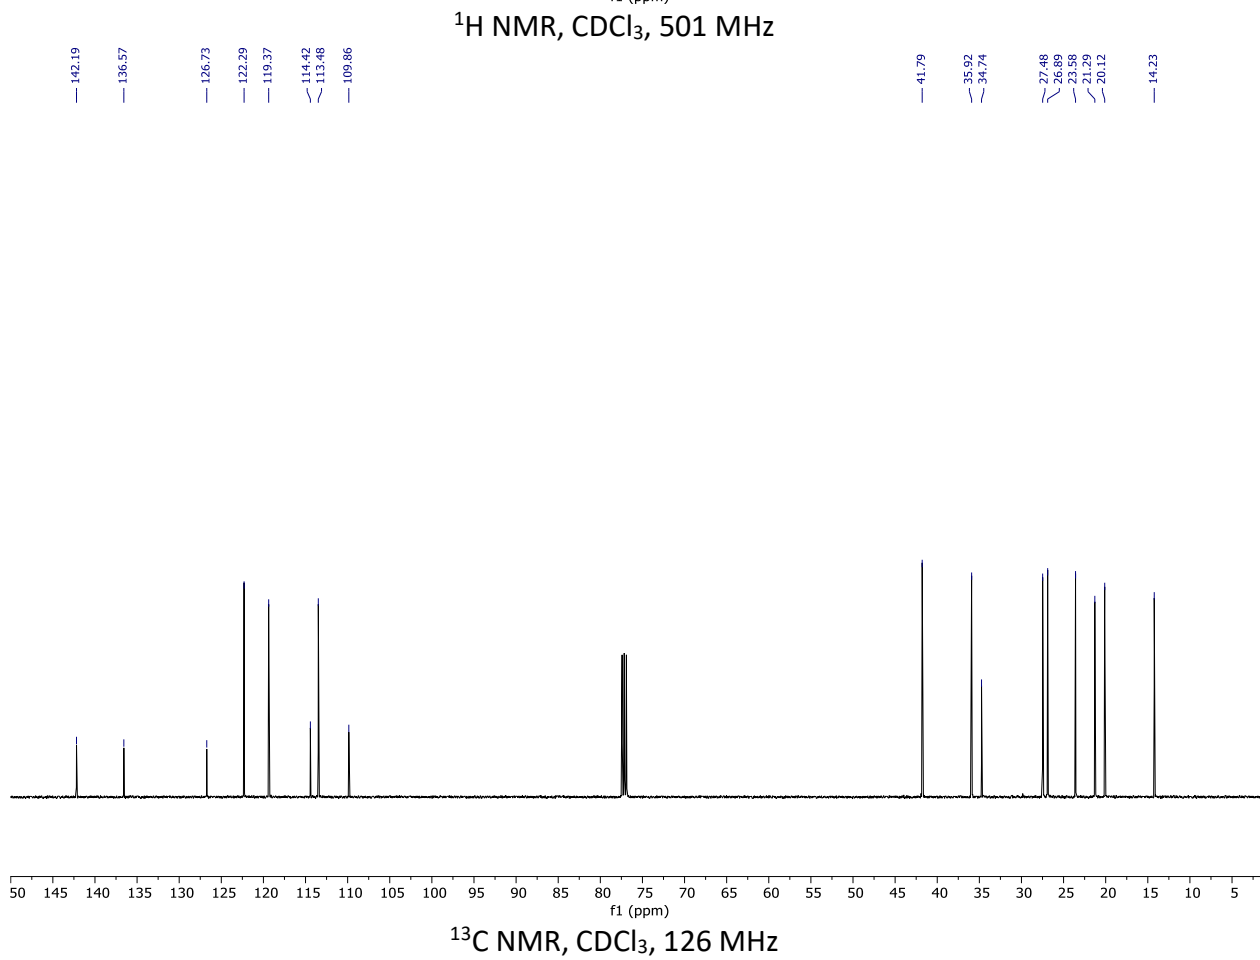

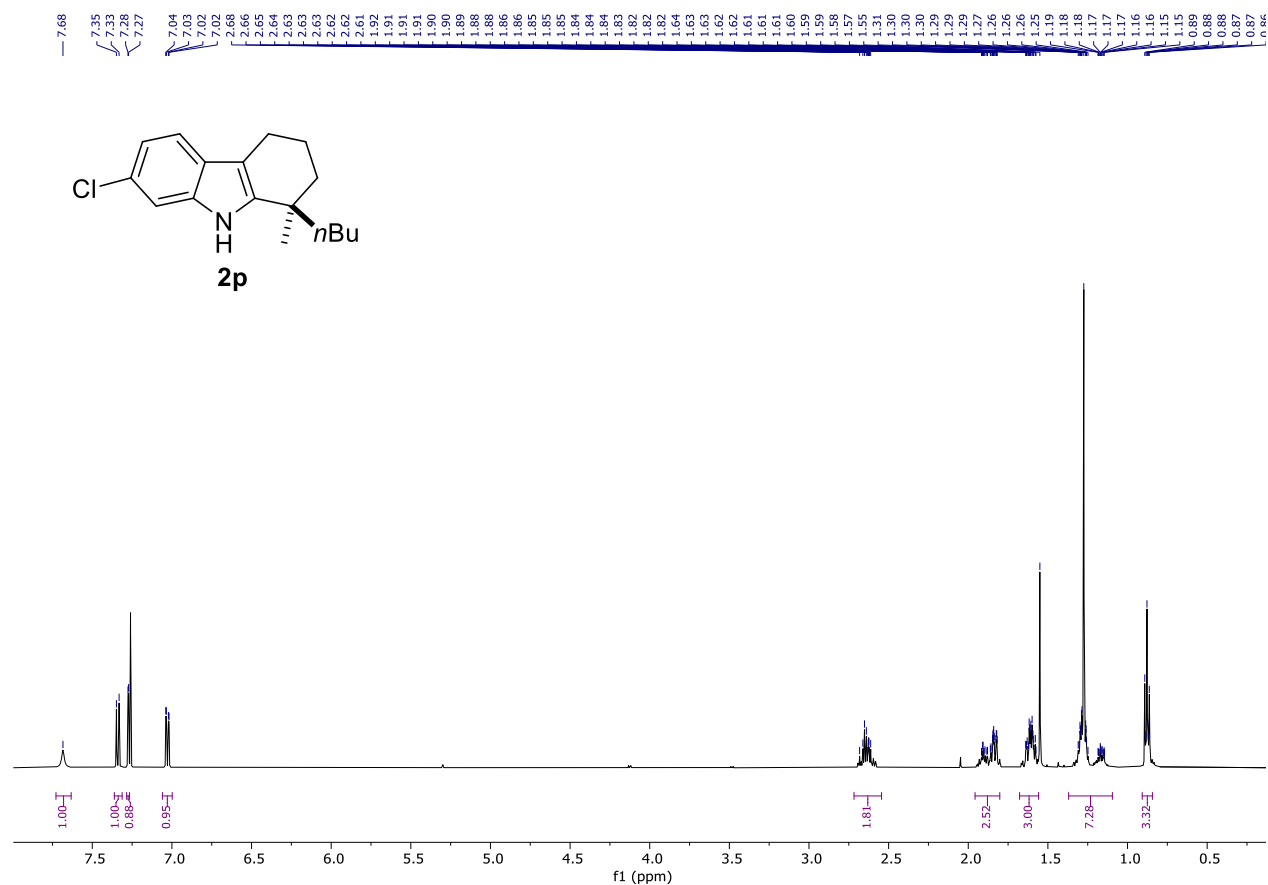

<sup>1</sup>H NMR, CDCl<sub>3</sub>, 501 MHz

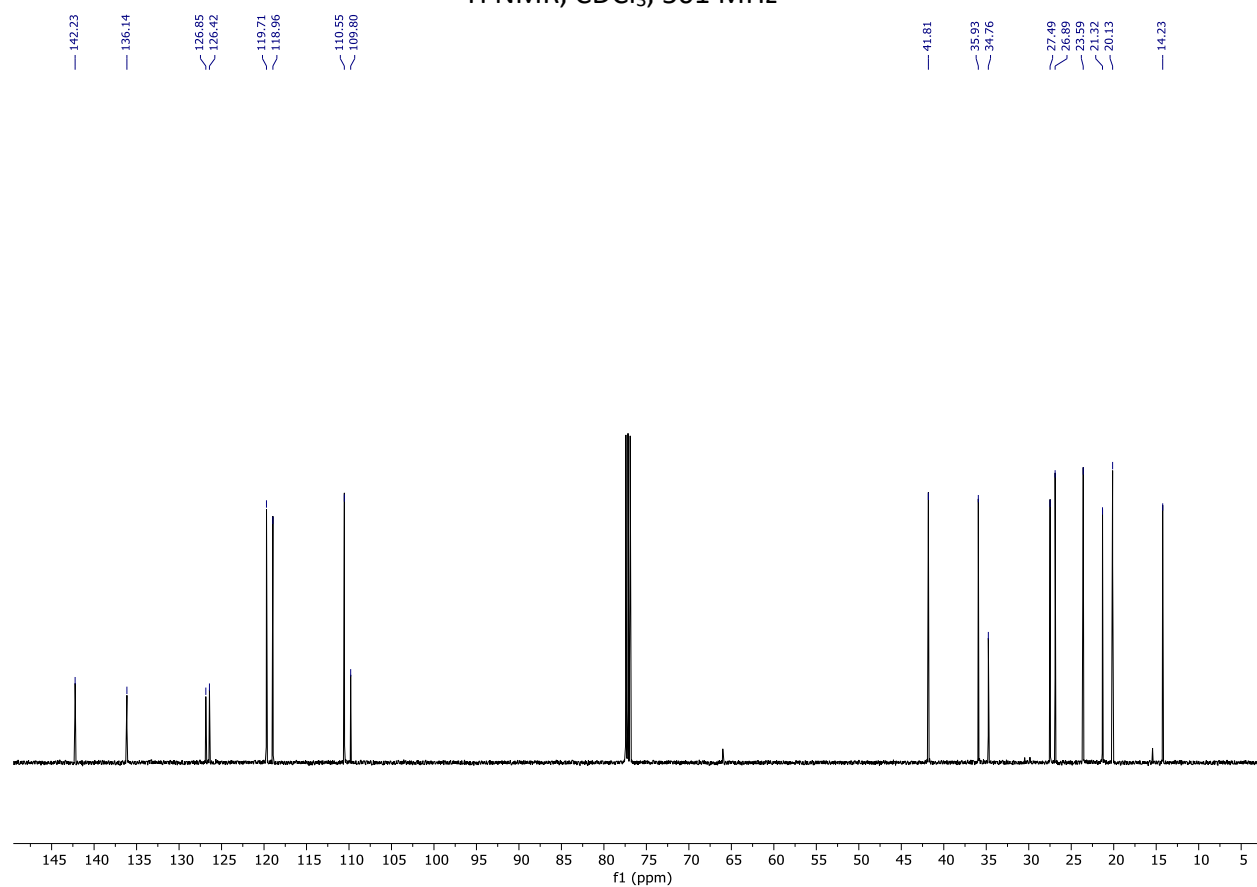

<sup>13</sup>C NMR, CDCl<sub>3</sub>, 126 MHz

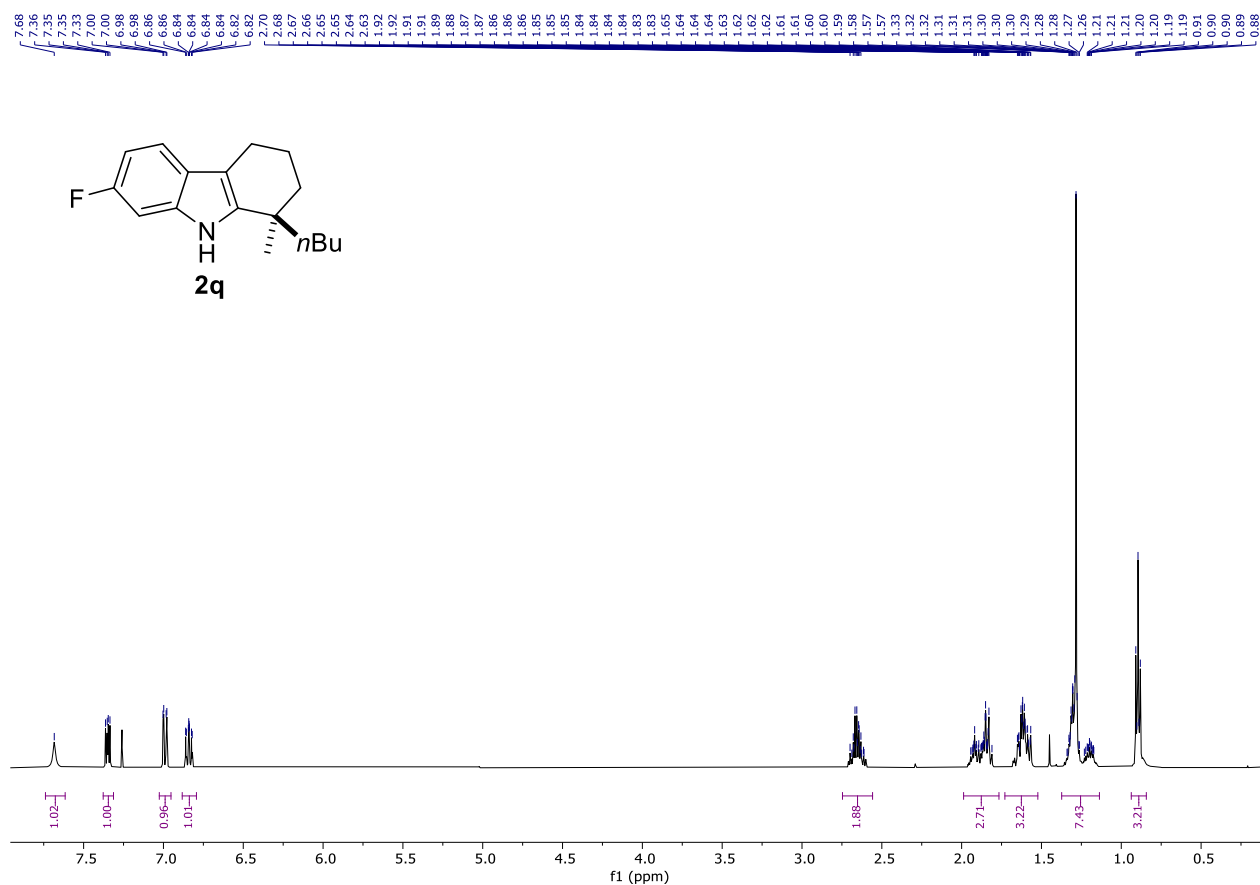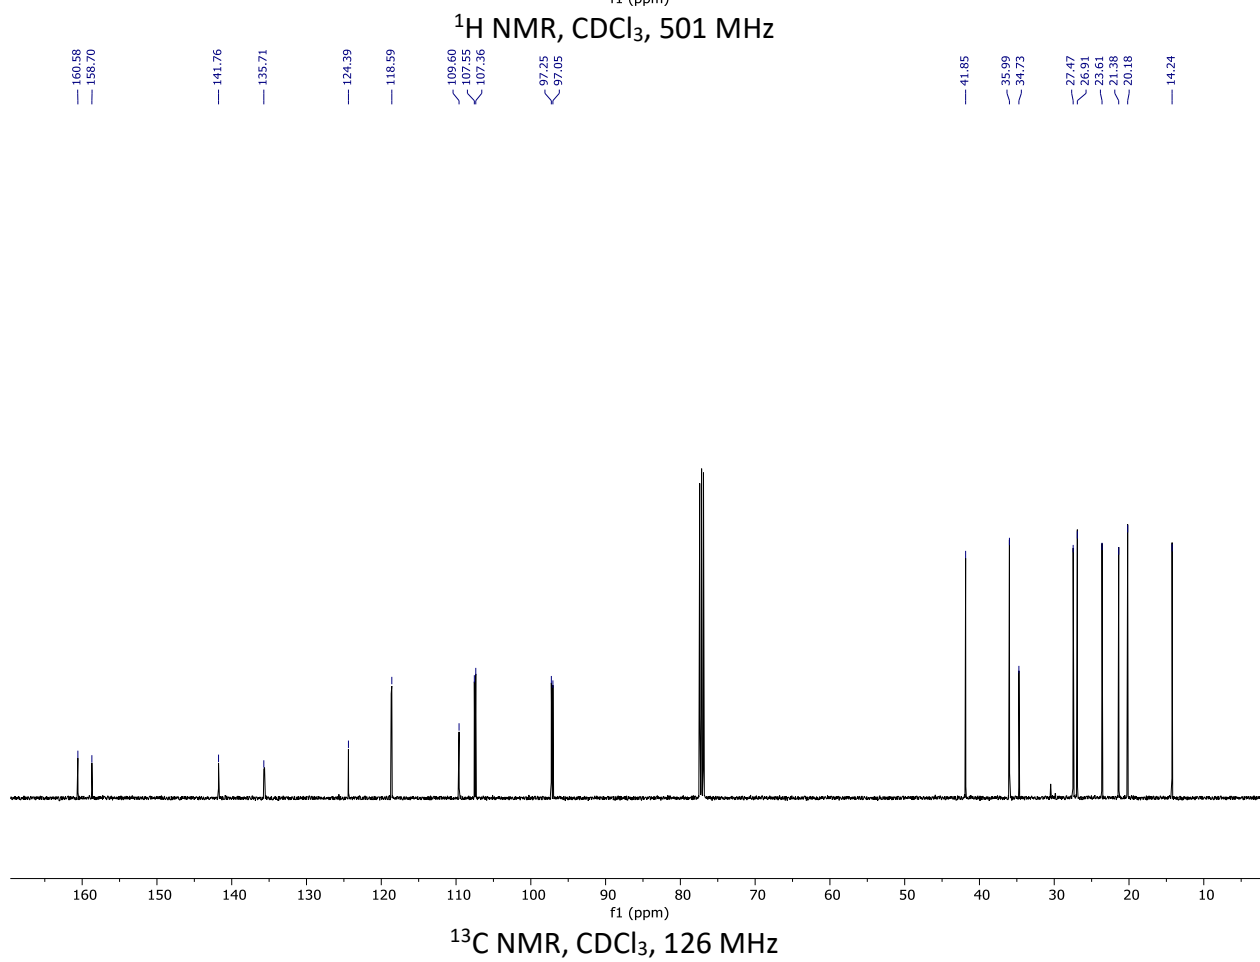

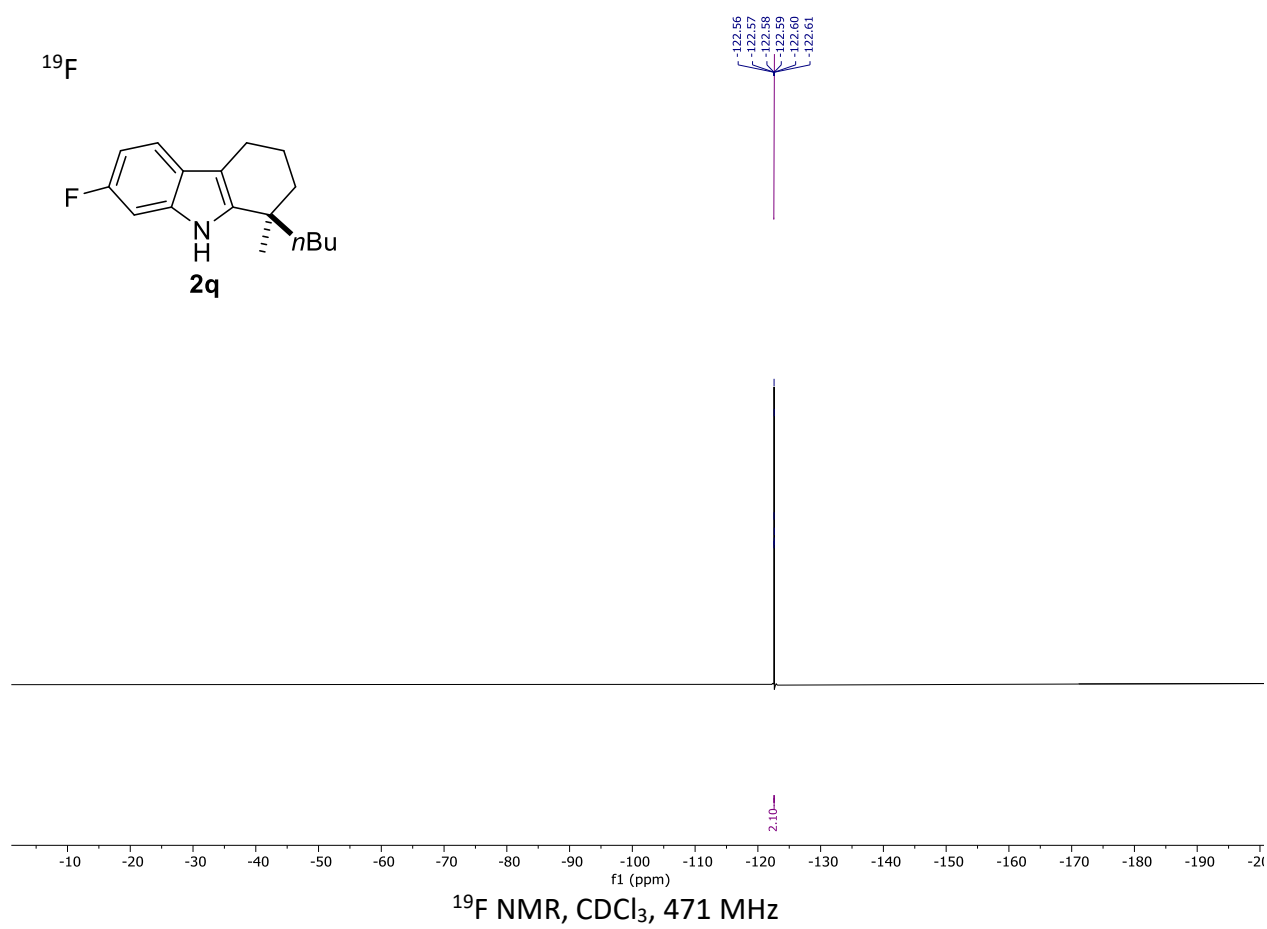

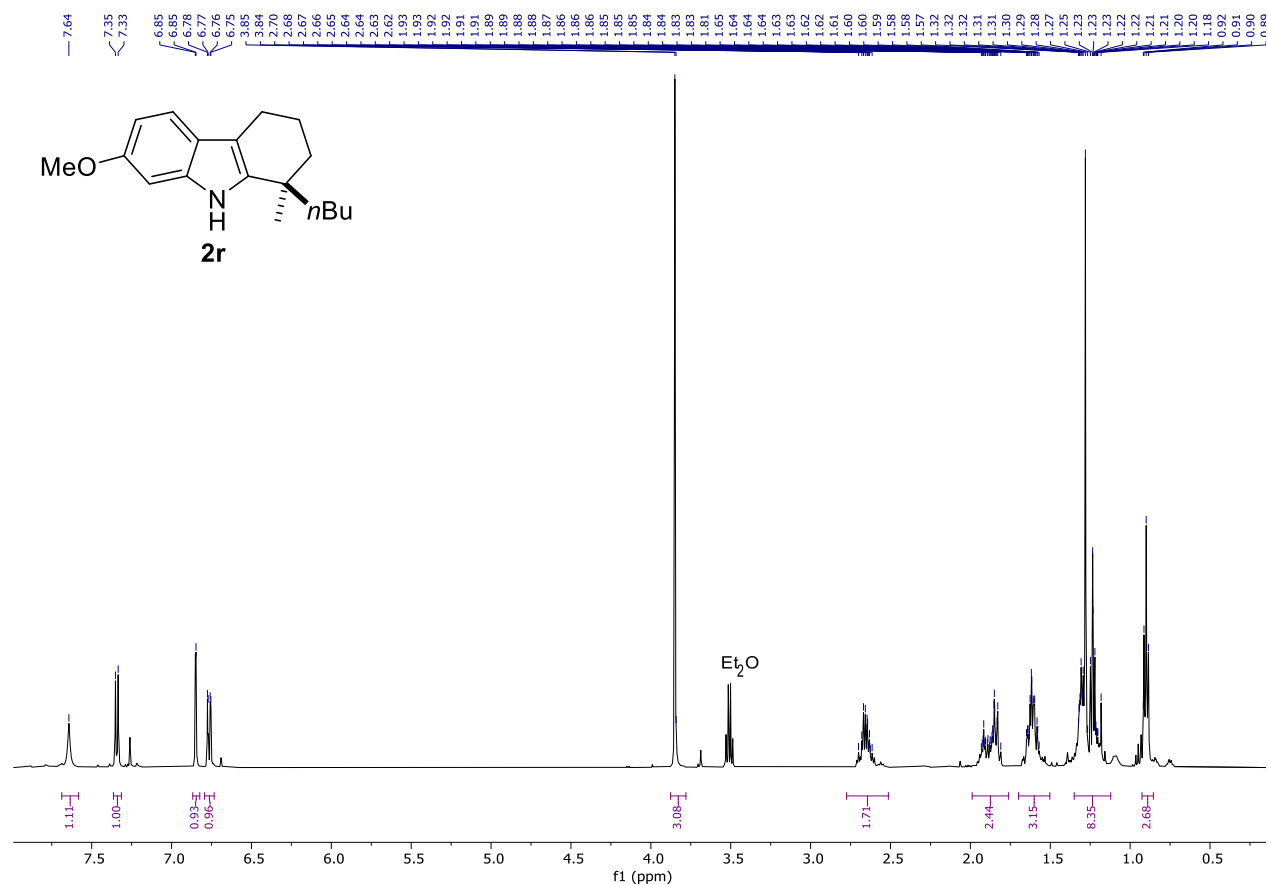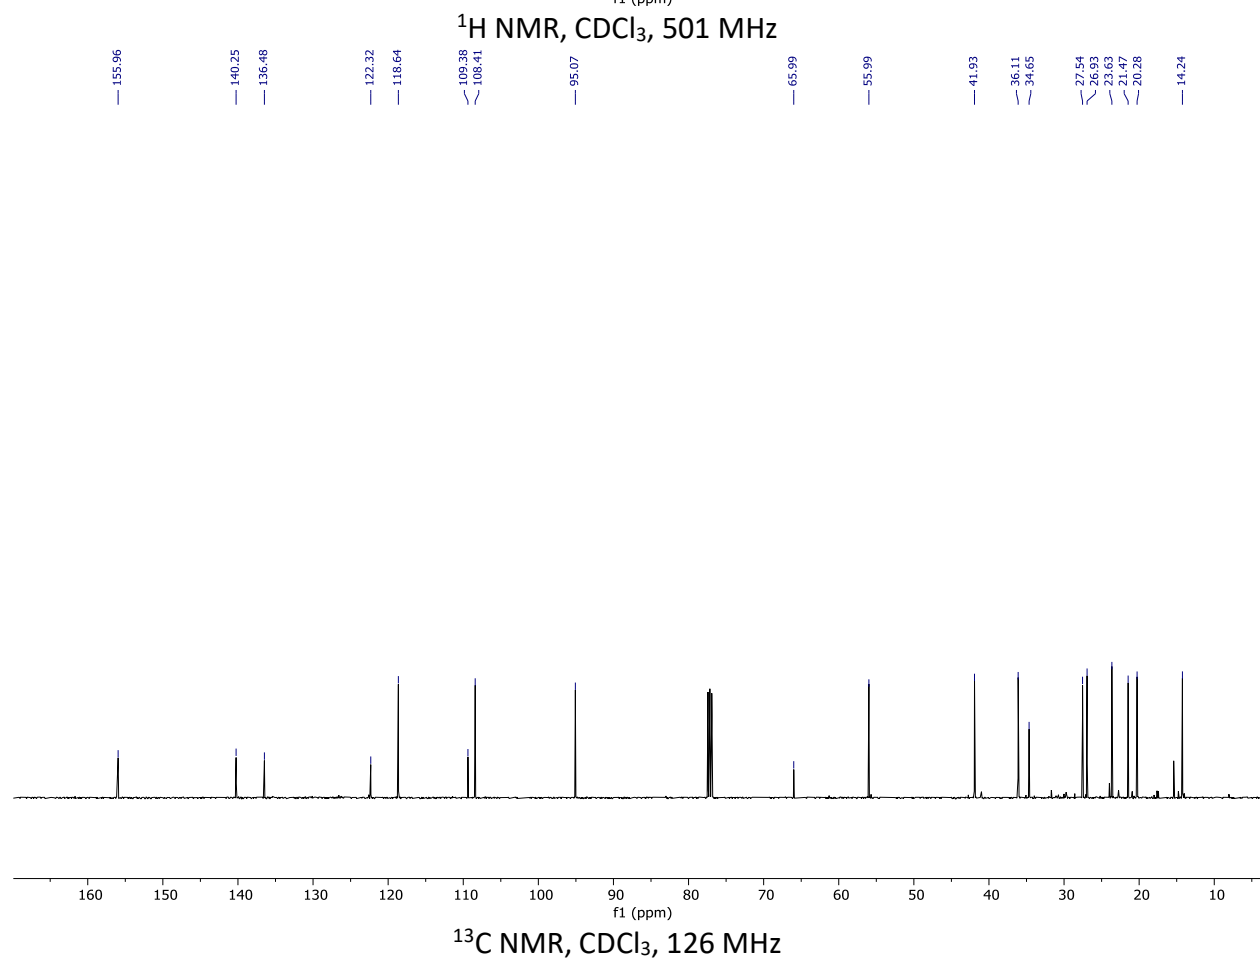

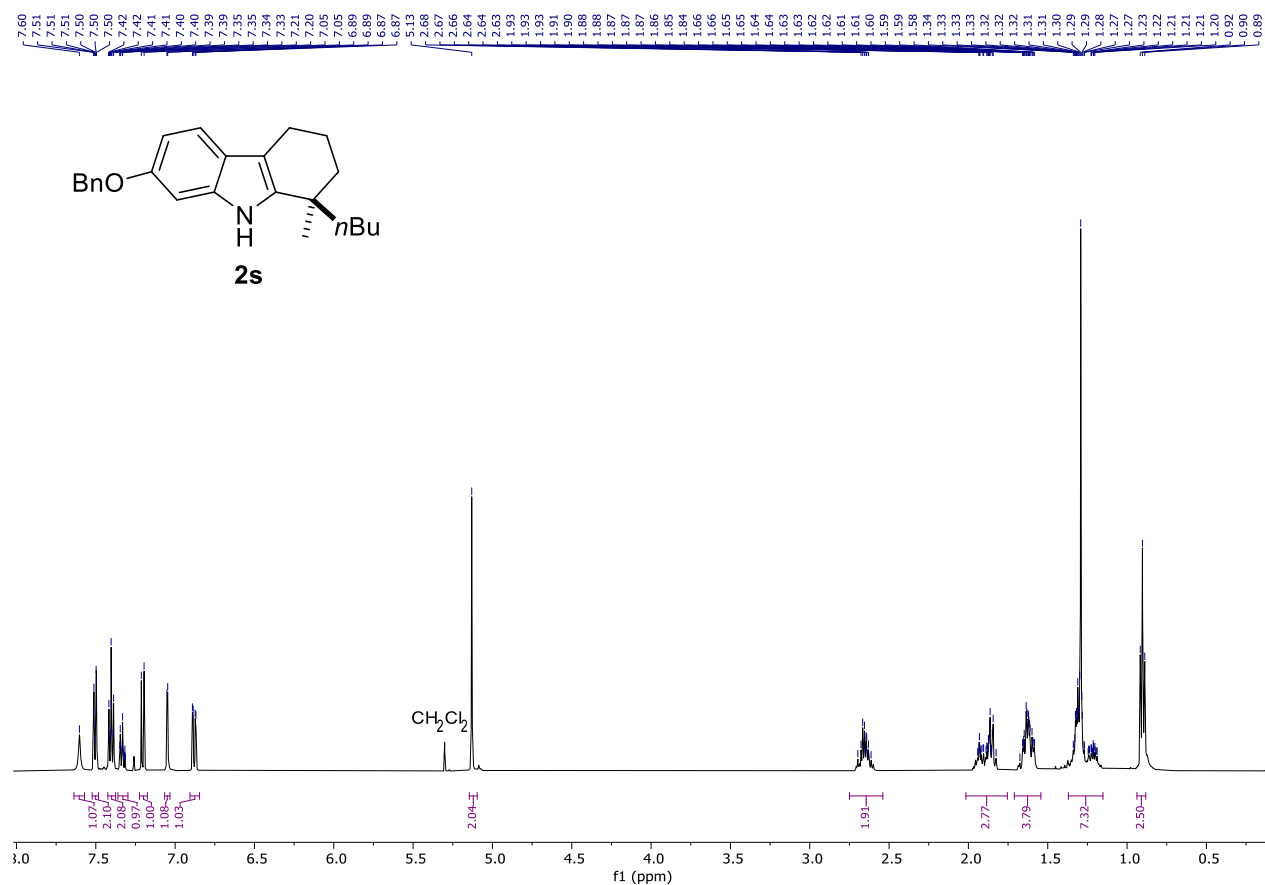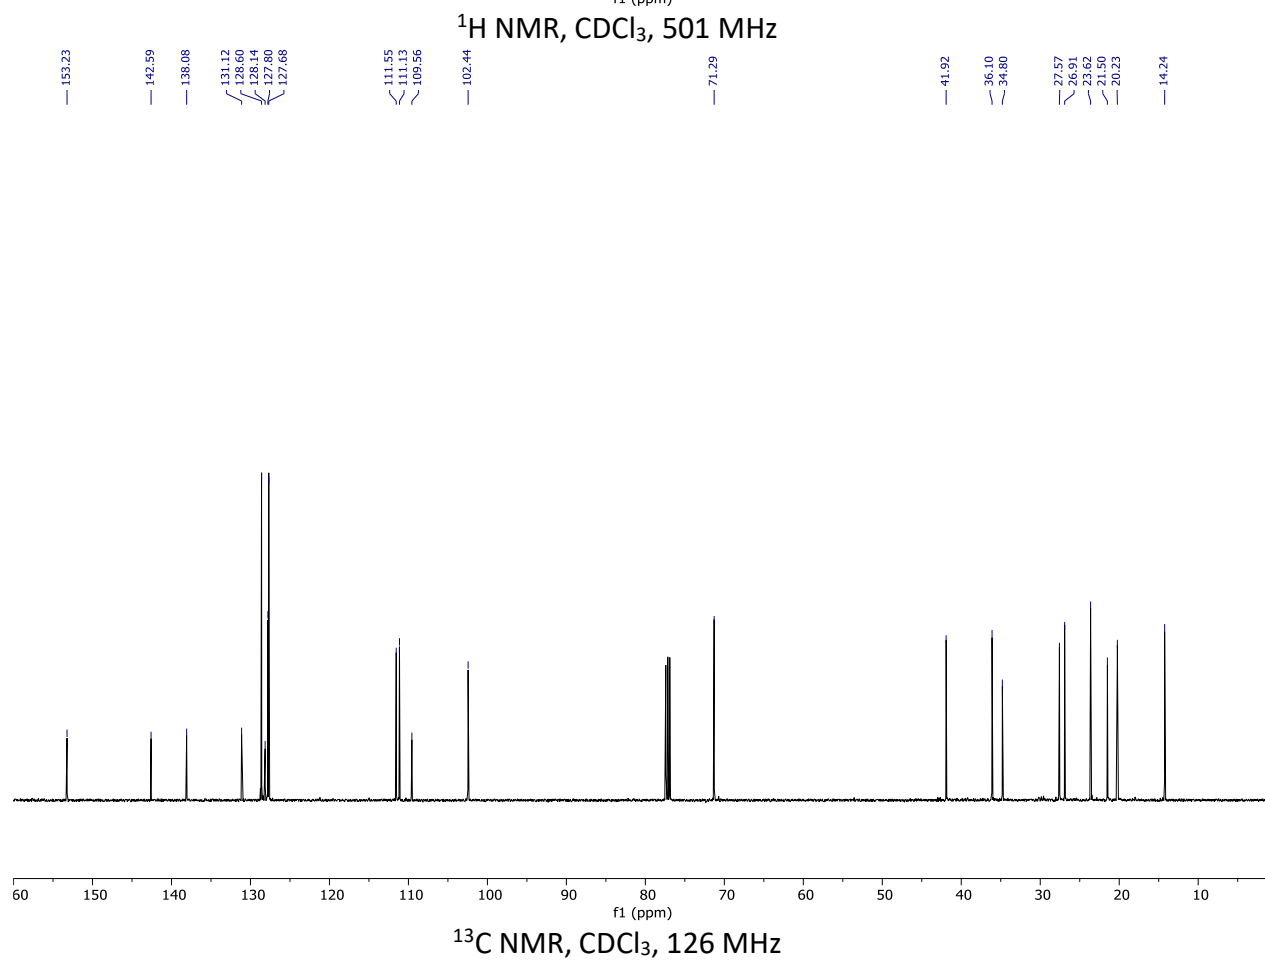

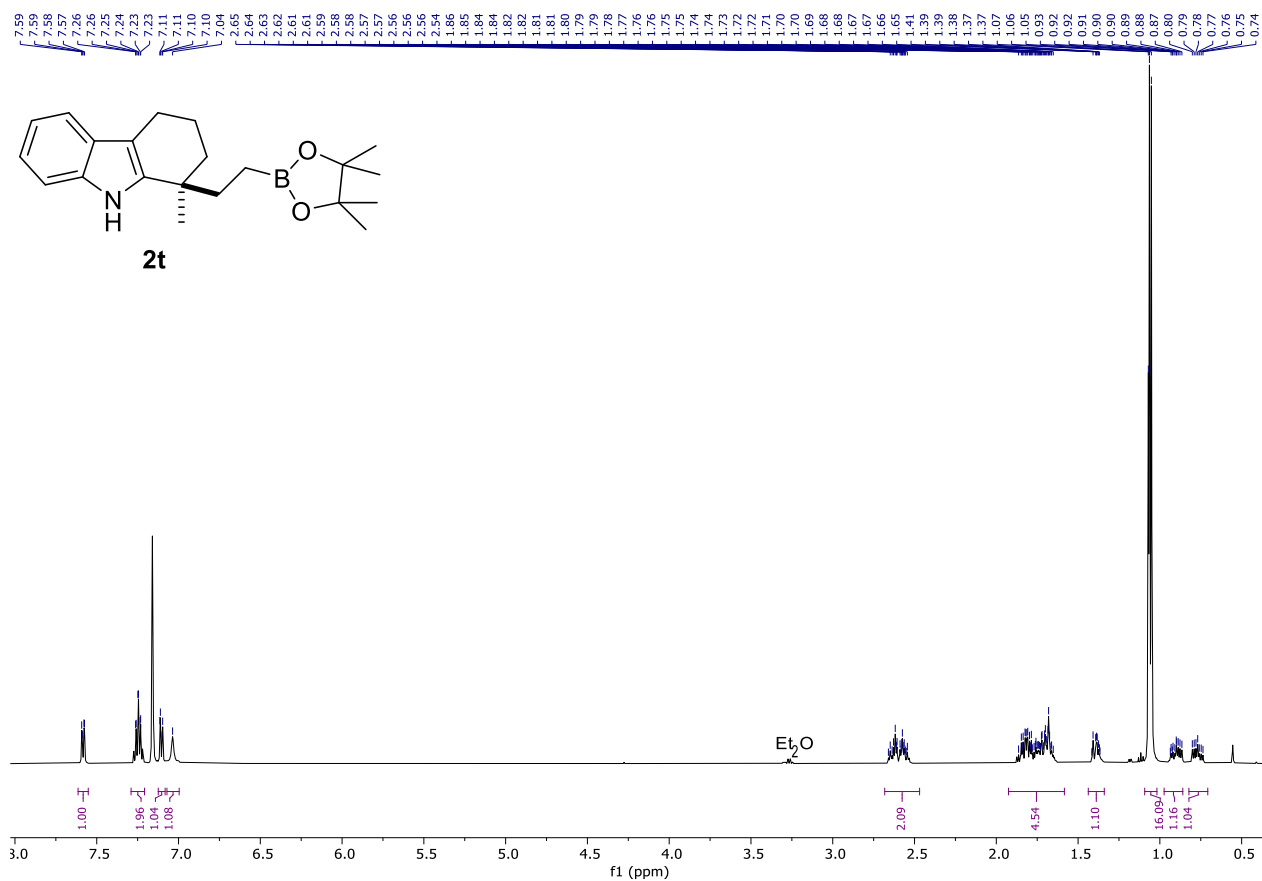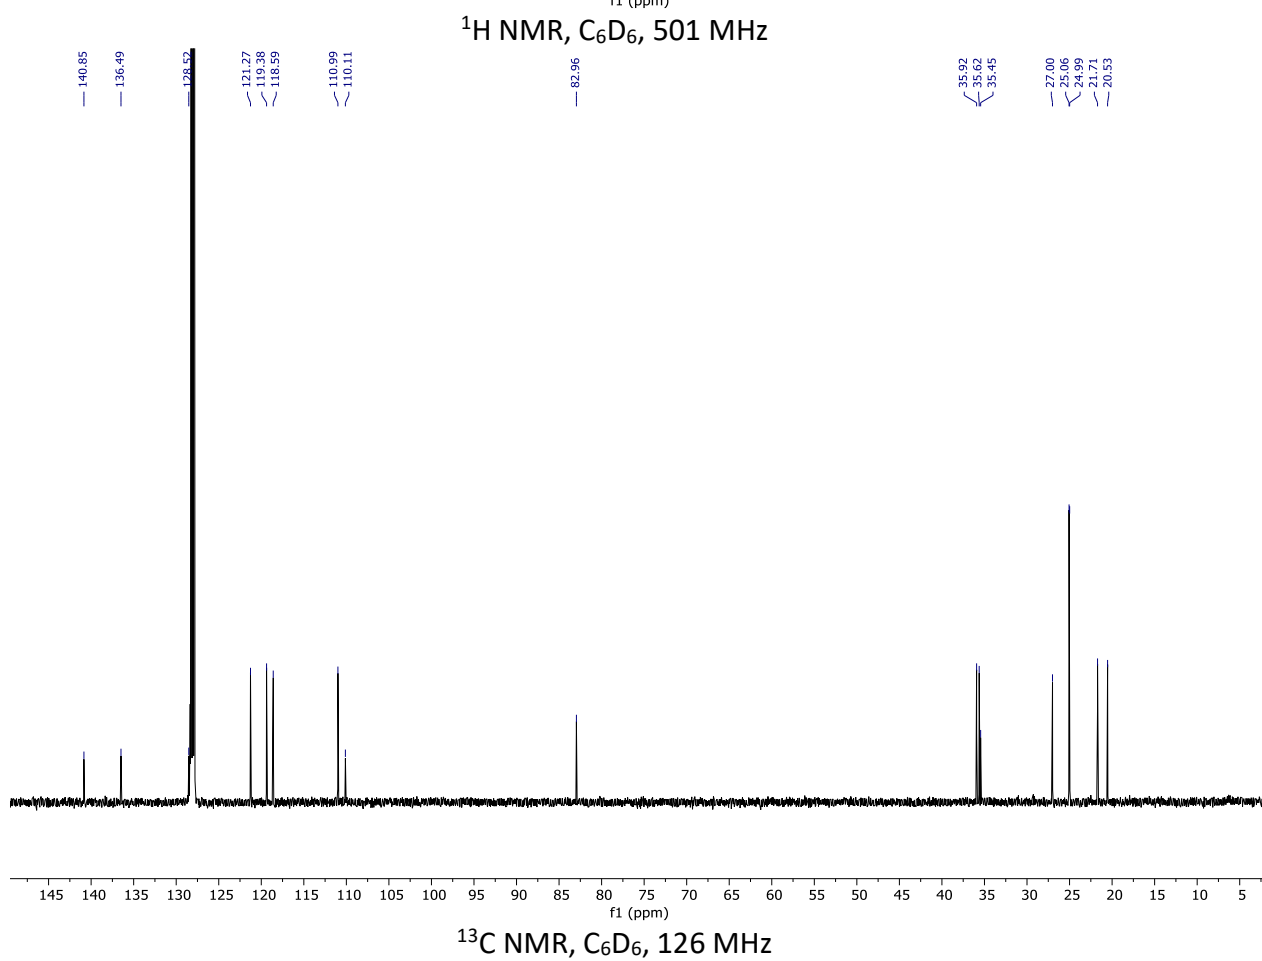

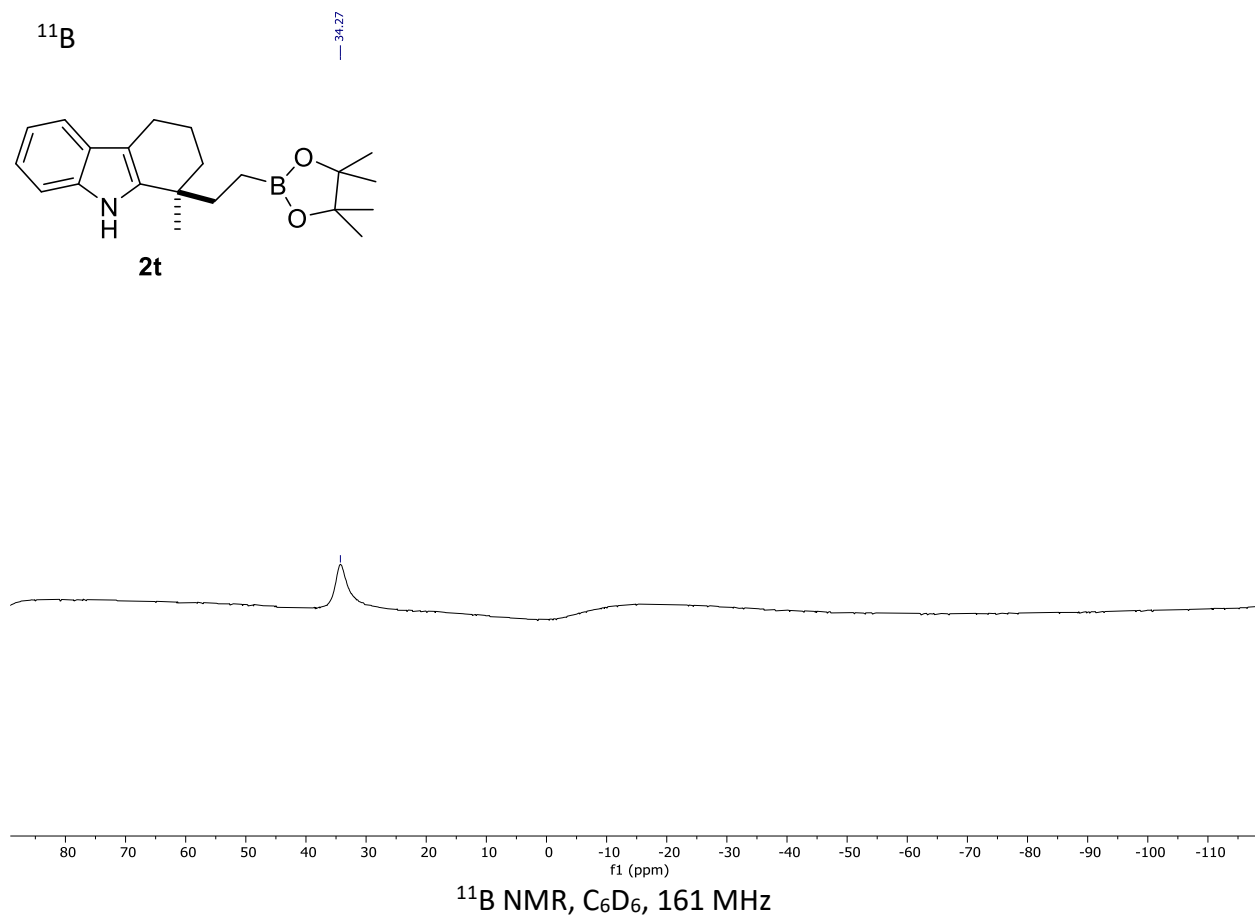



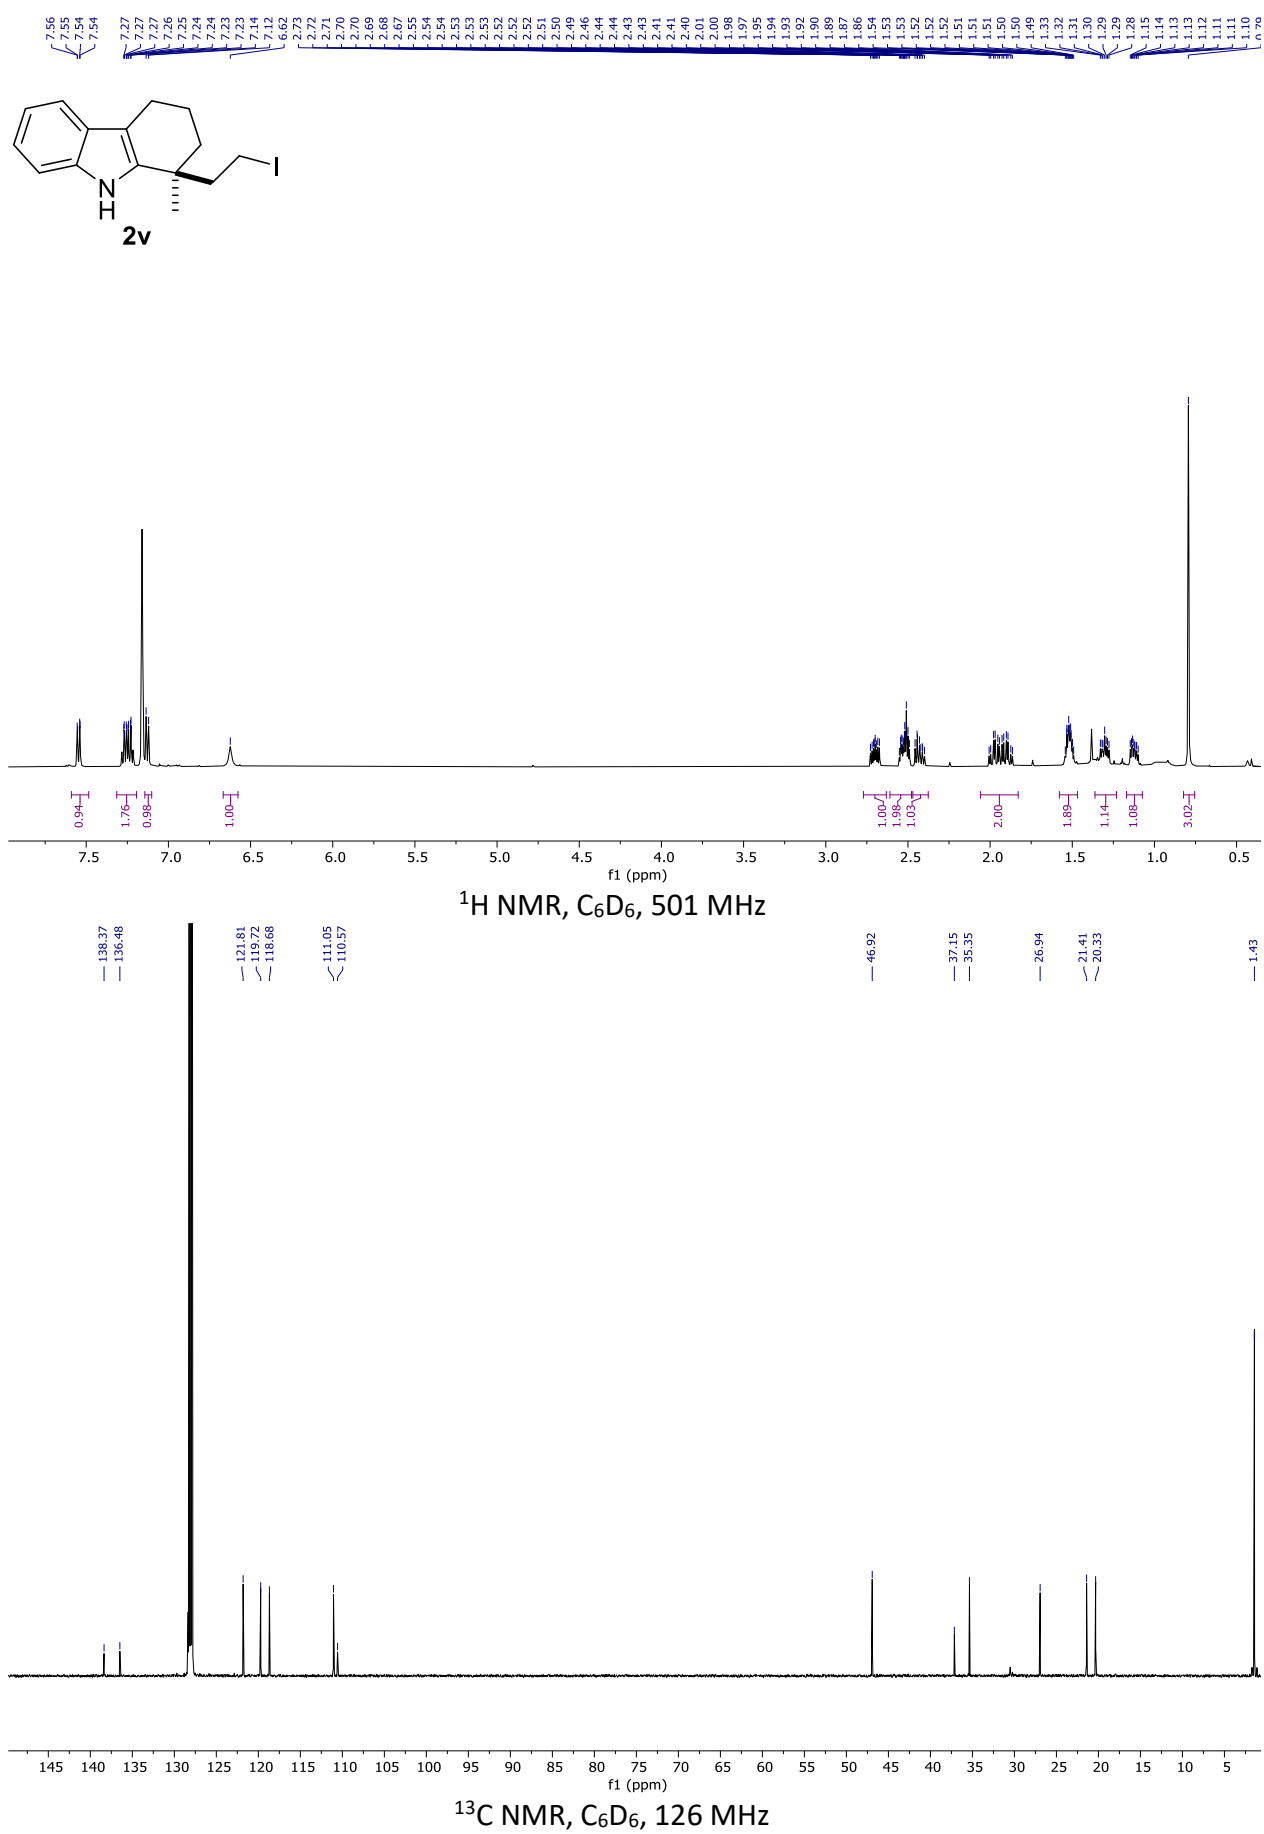

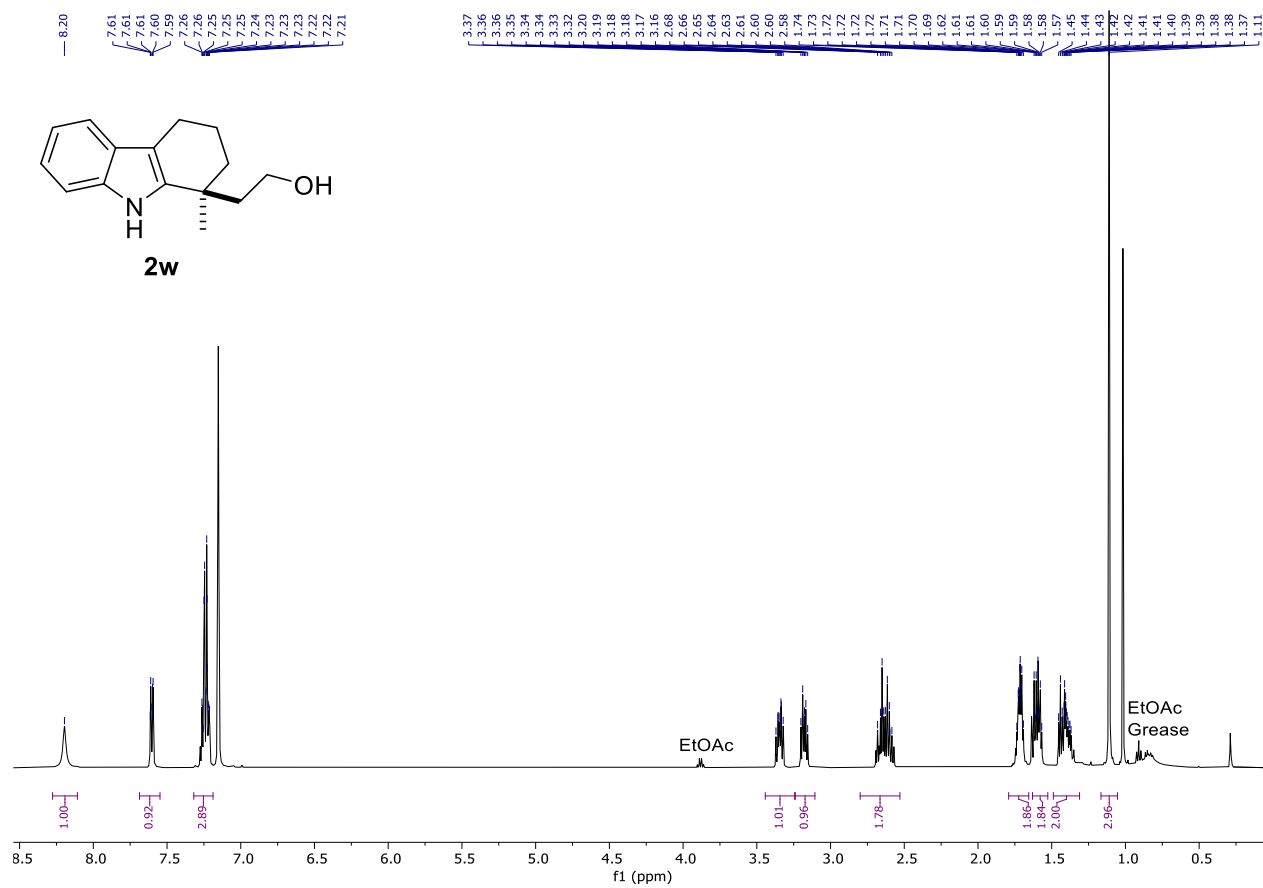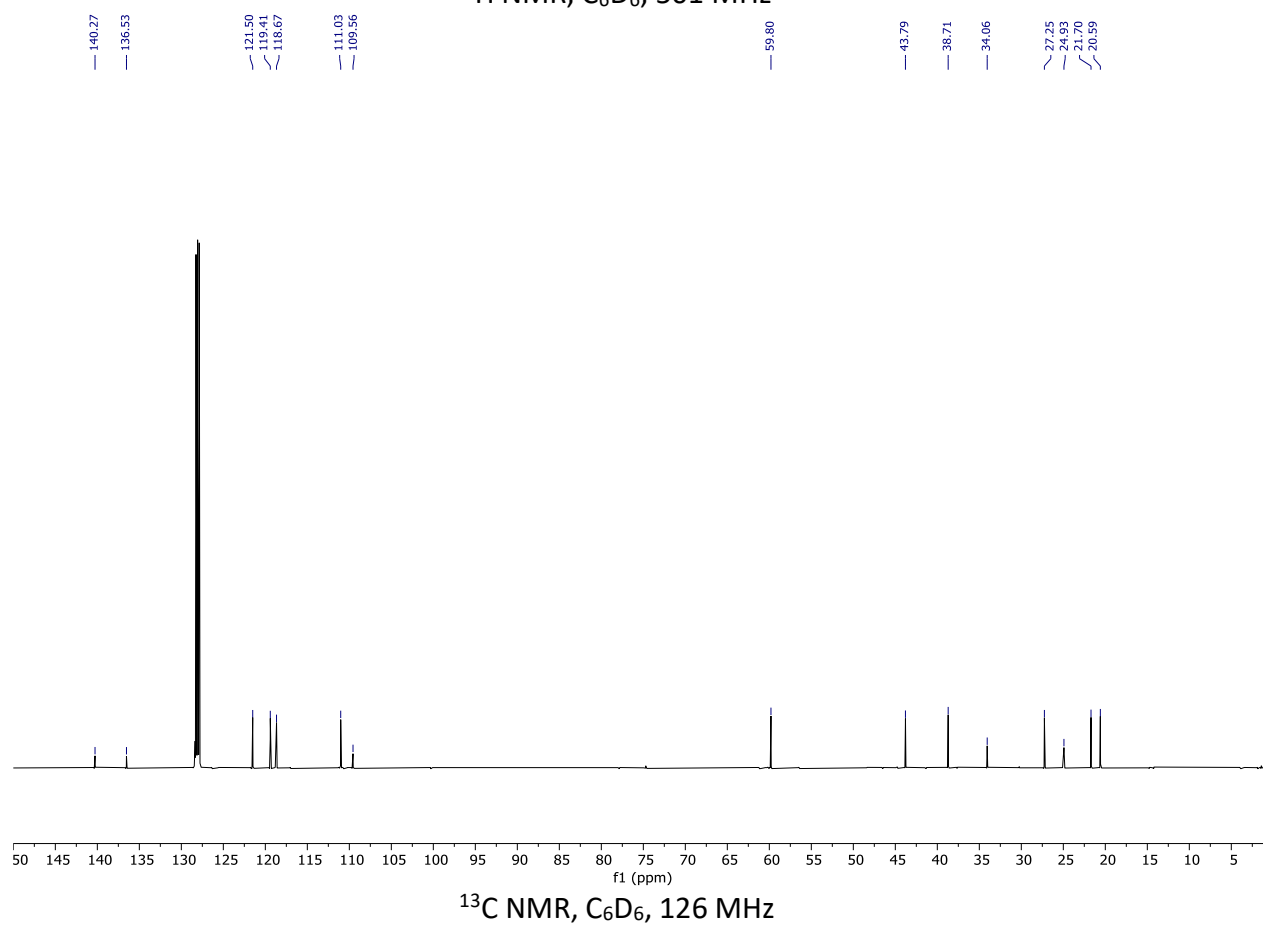

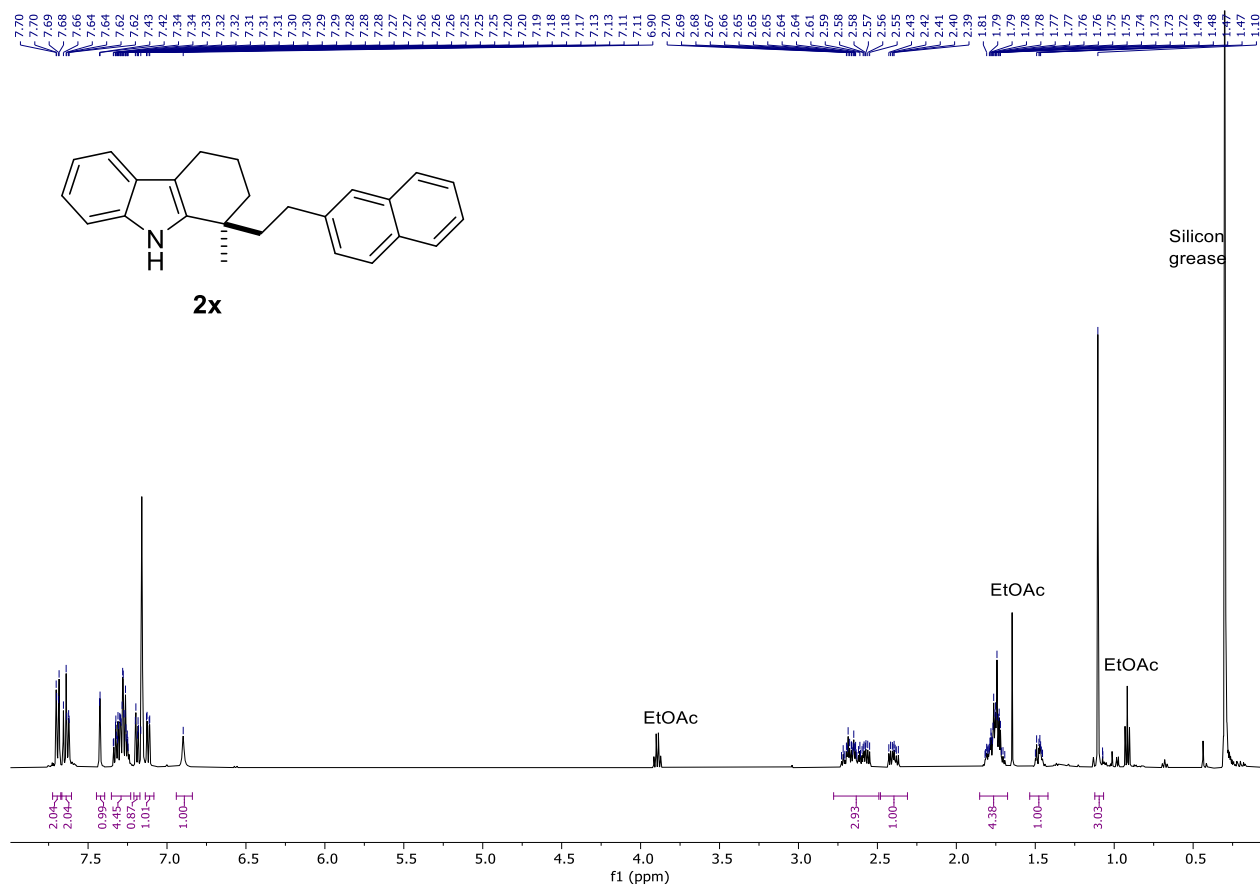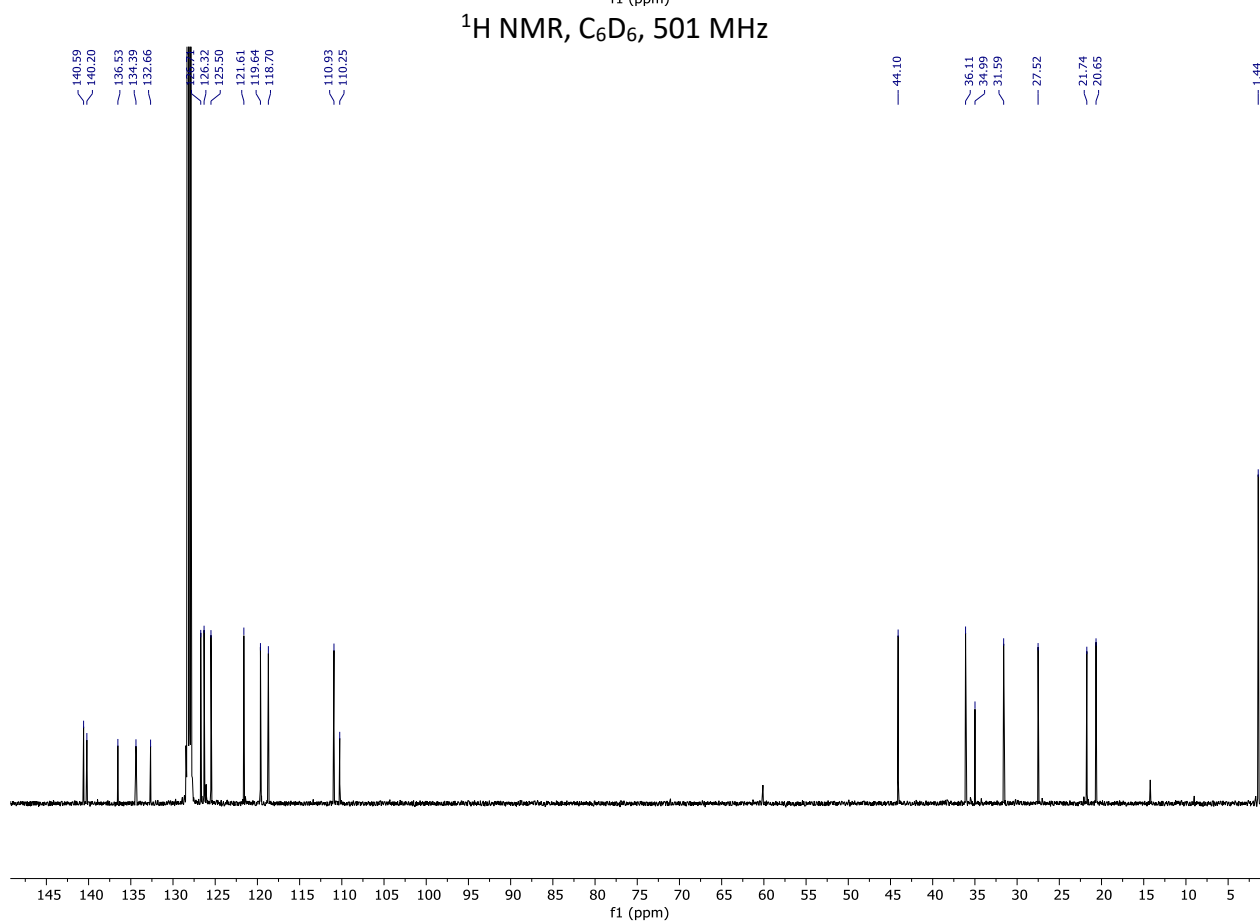

**<sup>13</sup>C NMR, C<sub>6</sub>D<sub>6</sub>, 126 MHz**

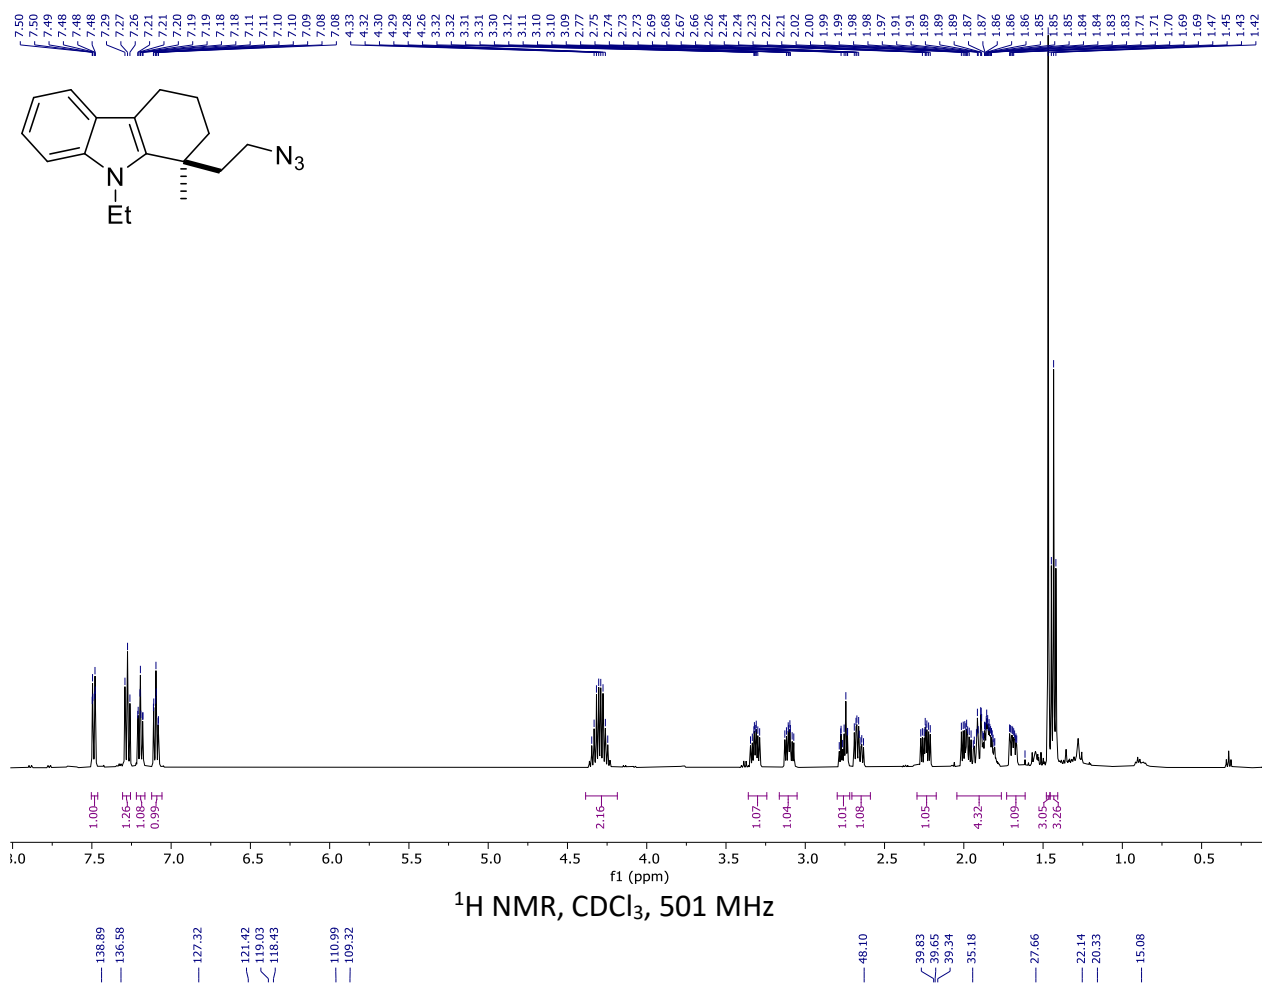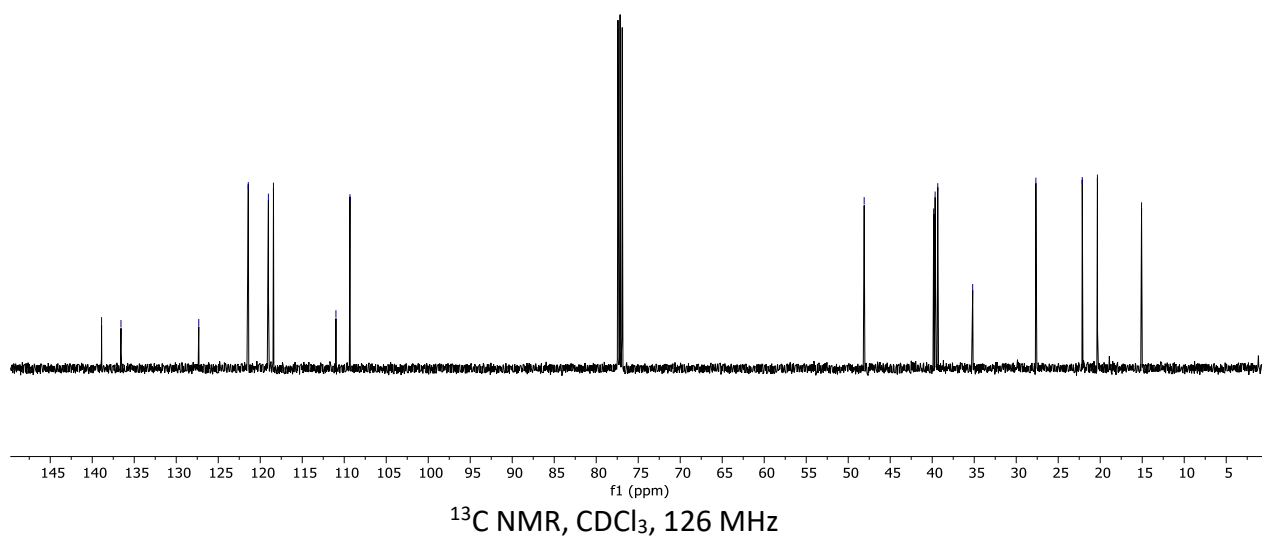

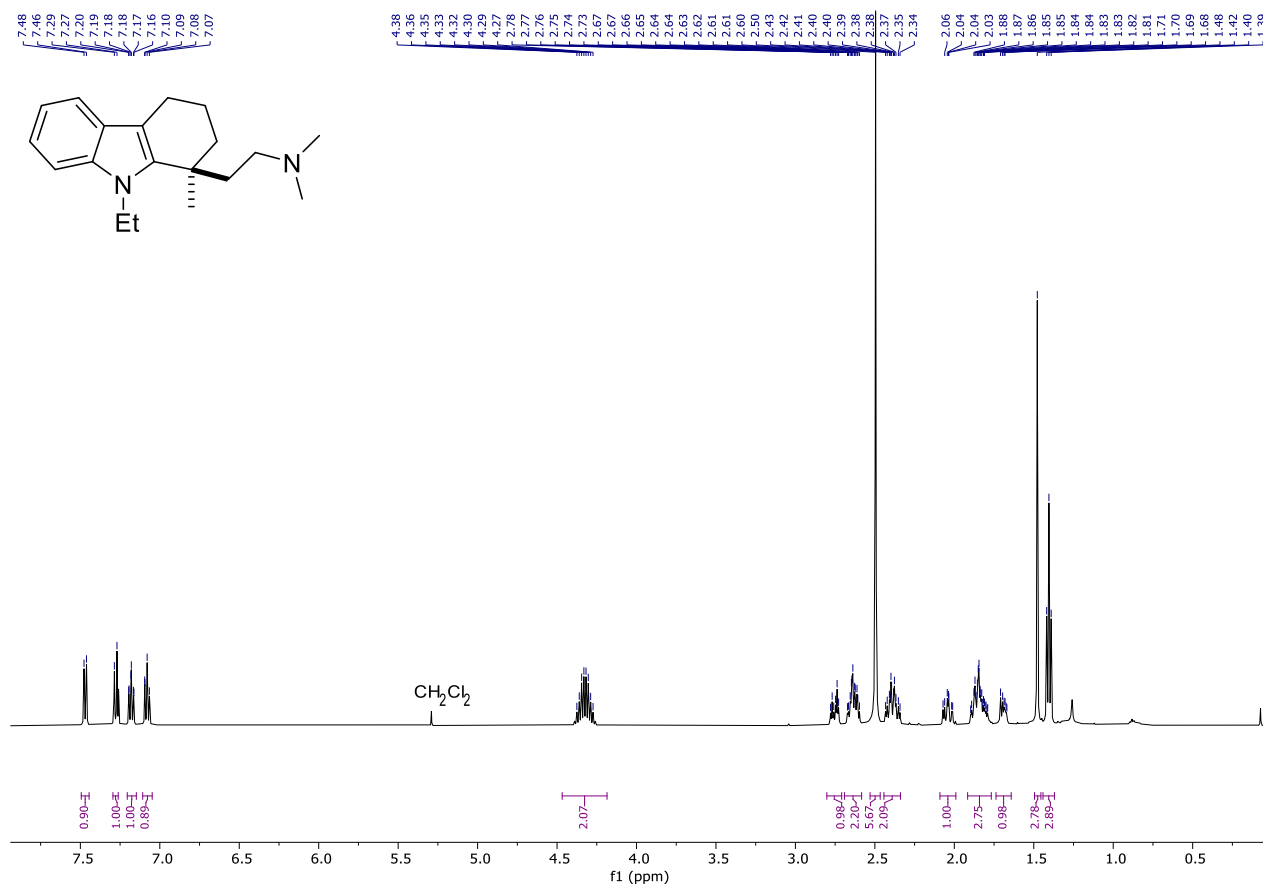

<sup>1</sup>H NMR, CDCl<sub>3</sub>, 501 MHz

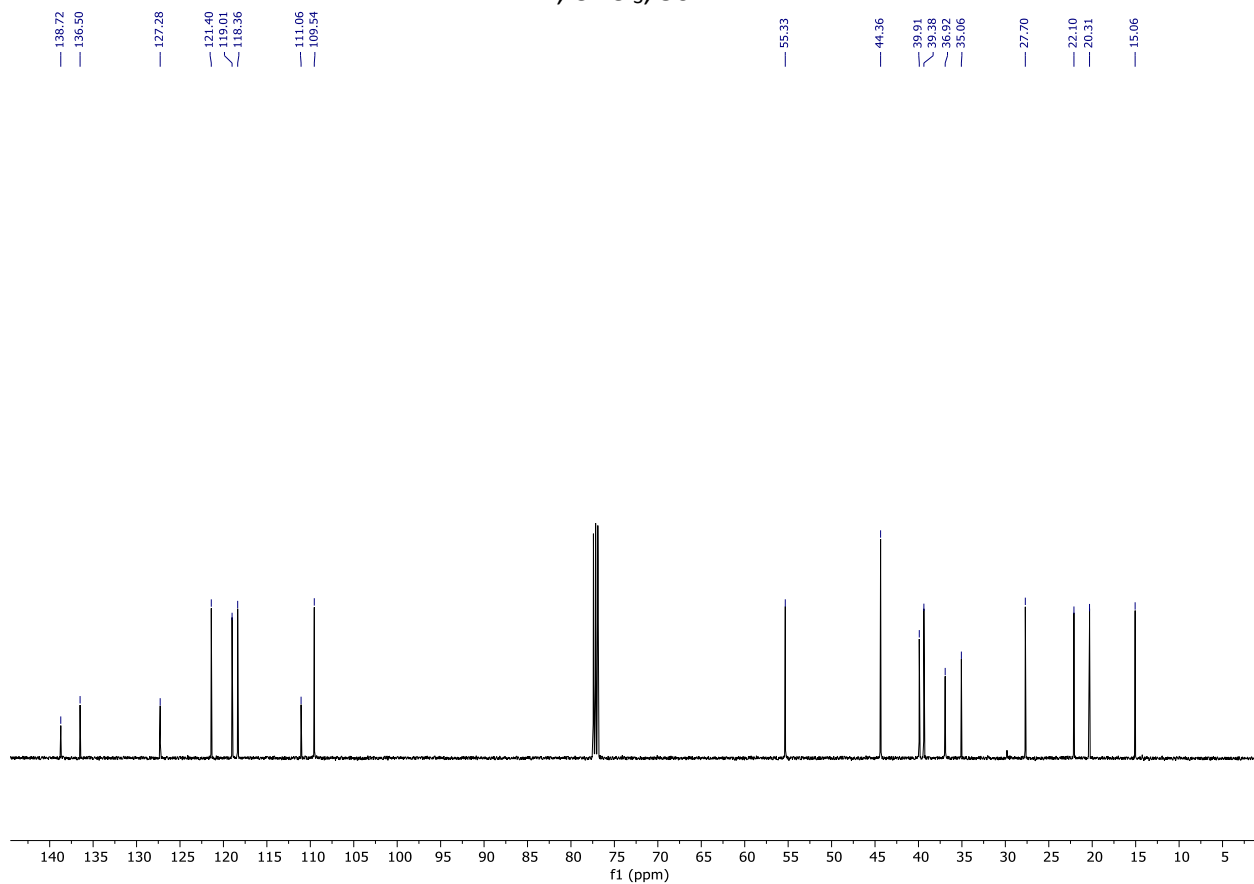

<sup>13</sup>C NMR, CDCl<sub>3</sub>, 126 MHz

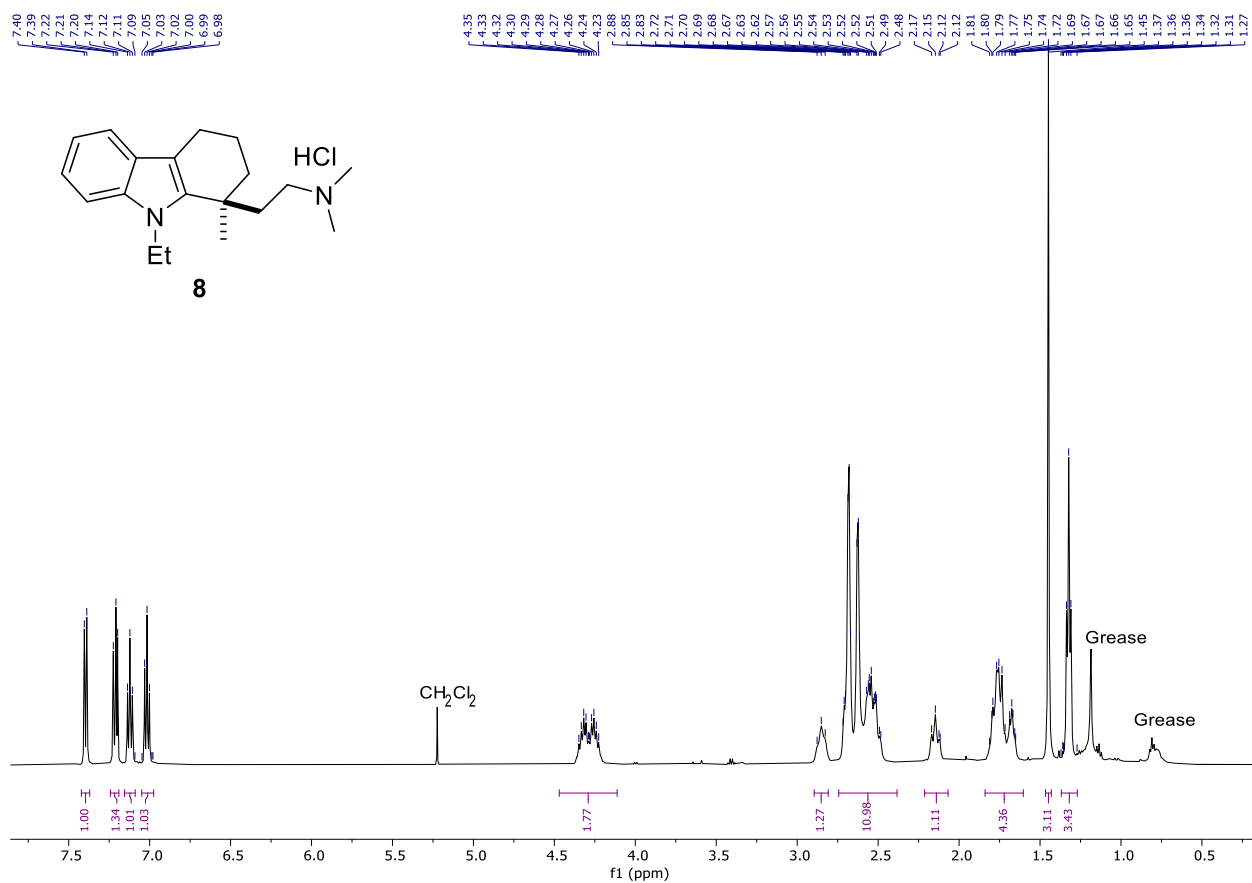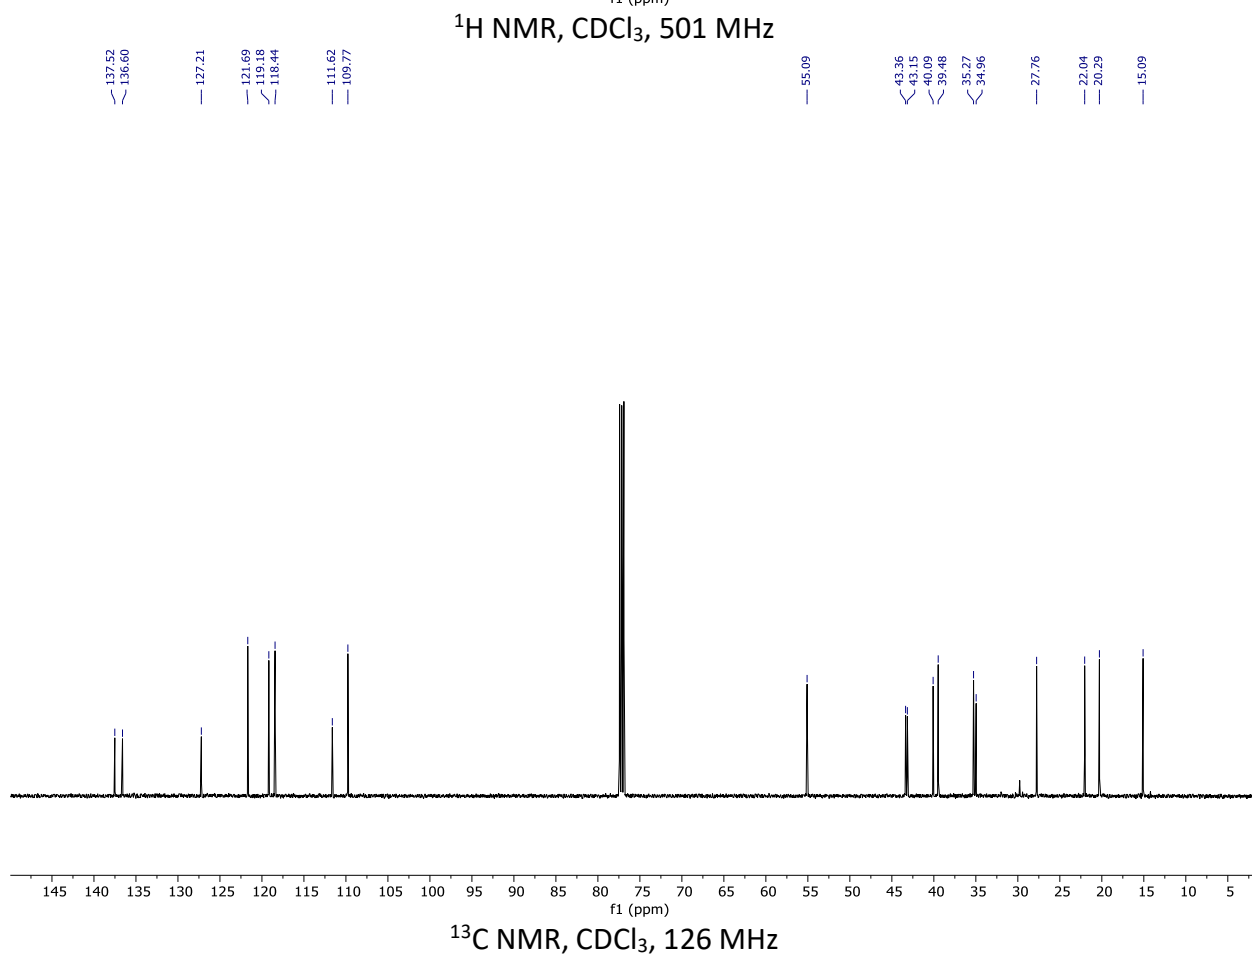

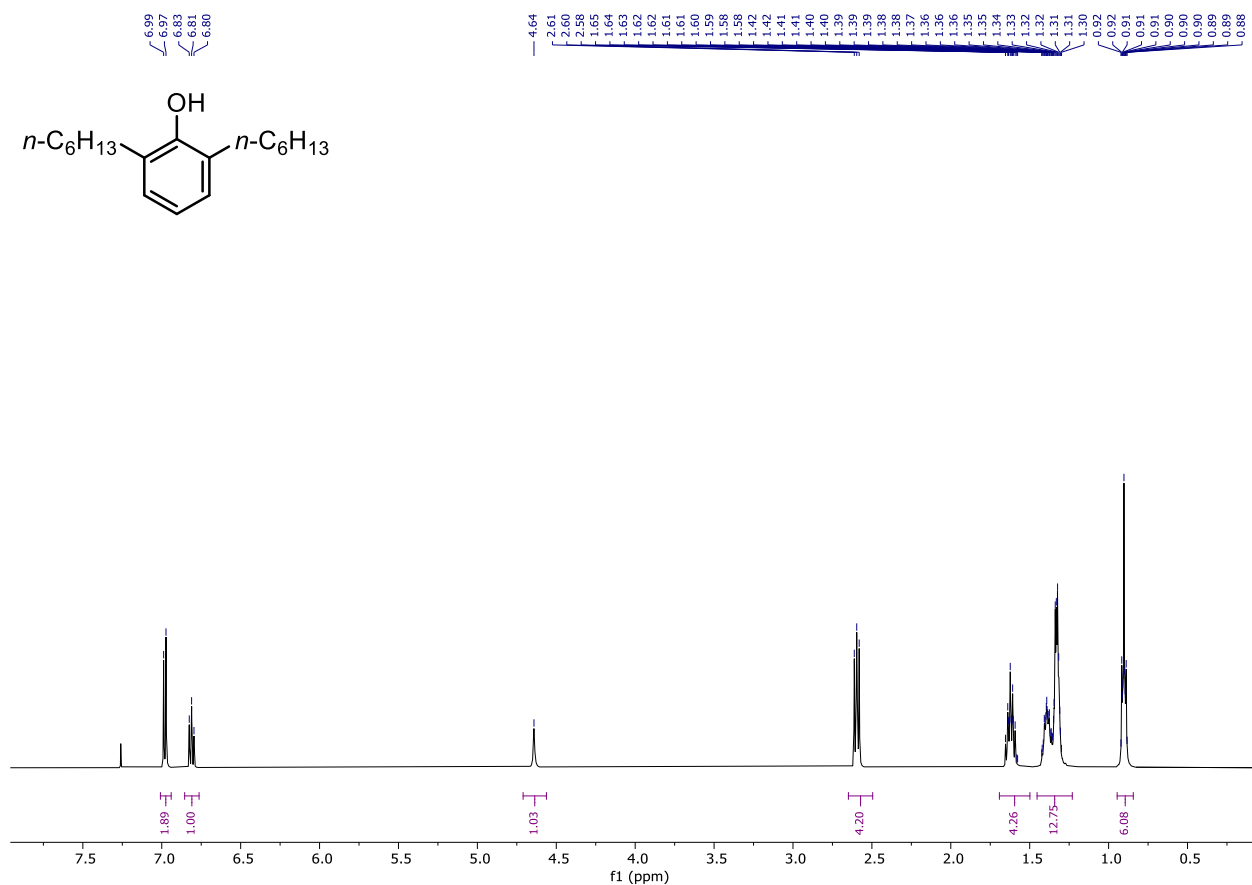

$^1\text{H}$  NMR, CDCl<sub>3</sub>, 501 MHz

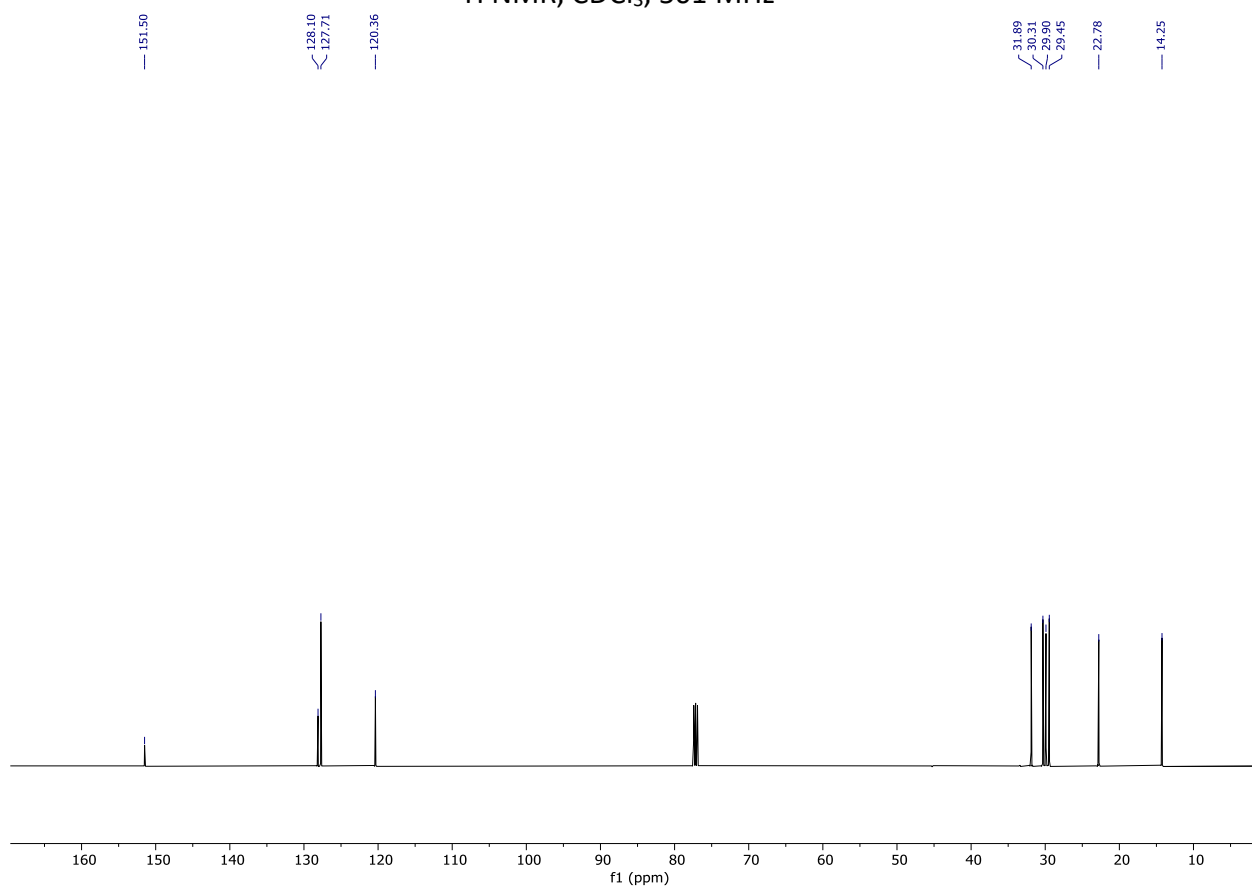

$^{13}\text{C}$  NMR, CDCl<sub>3</sub>, 126 MHz

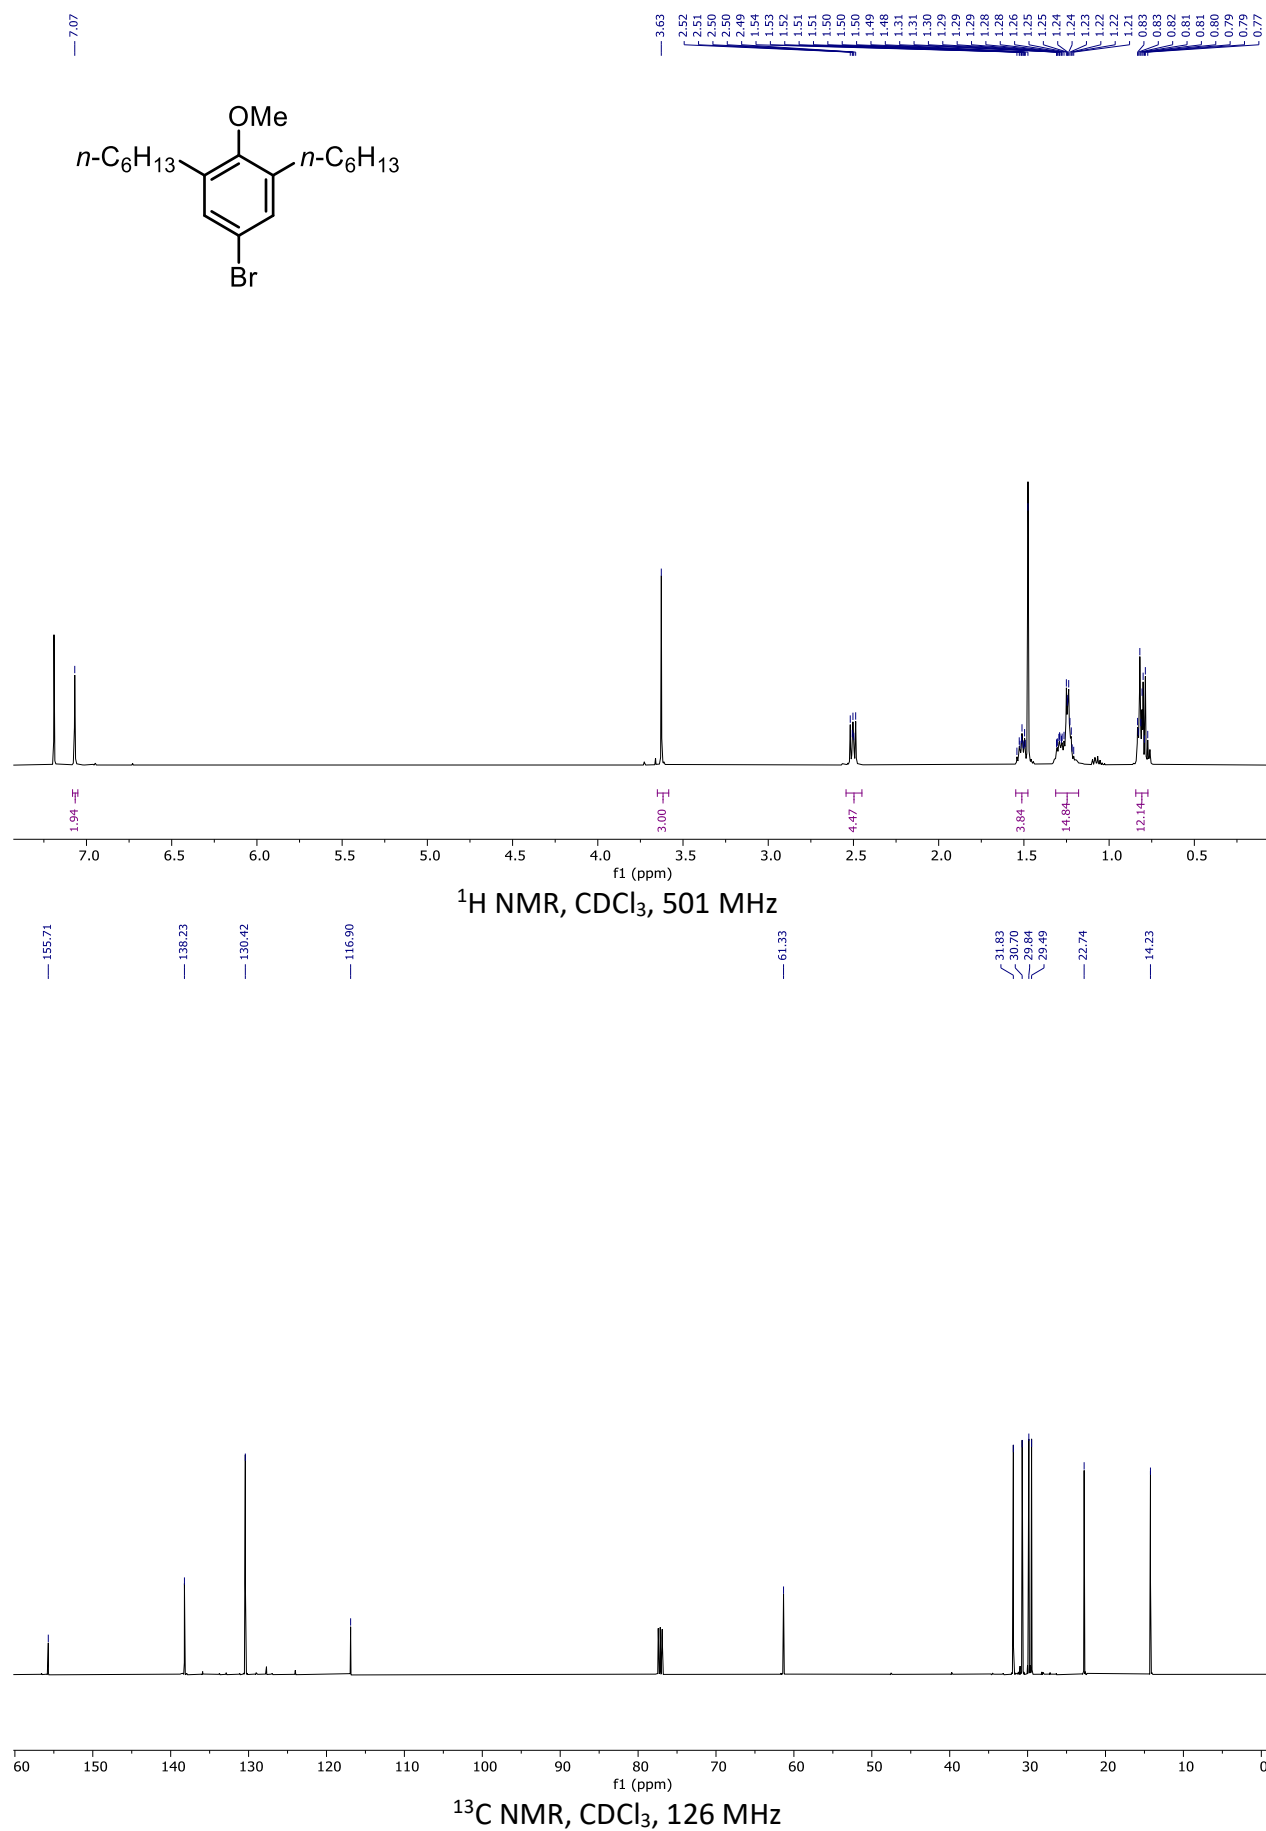

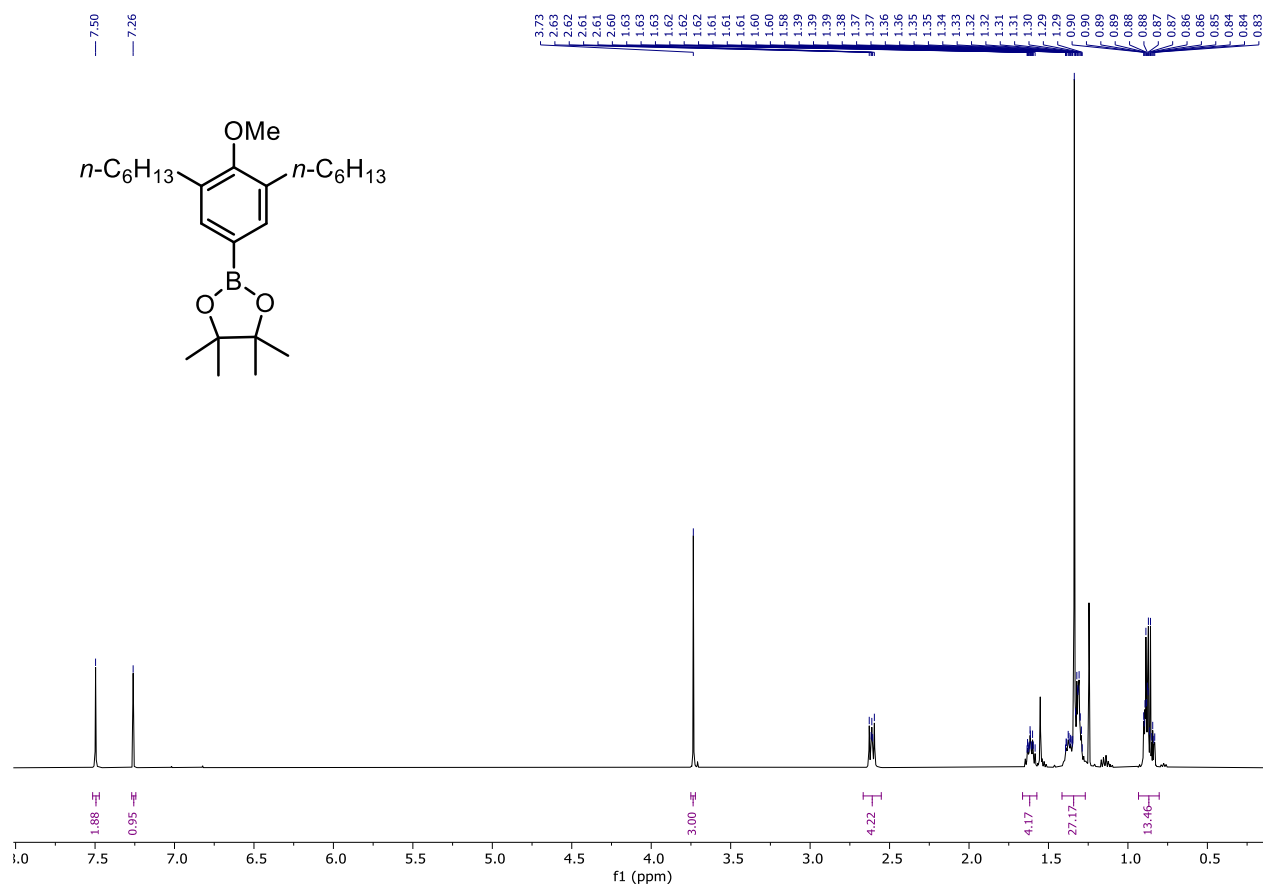

<sup>1</sup>H NMR, CDCl<sub>3</sub>, 501 MHz

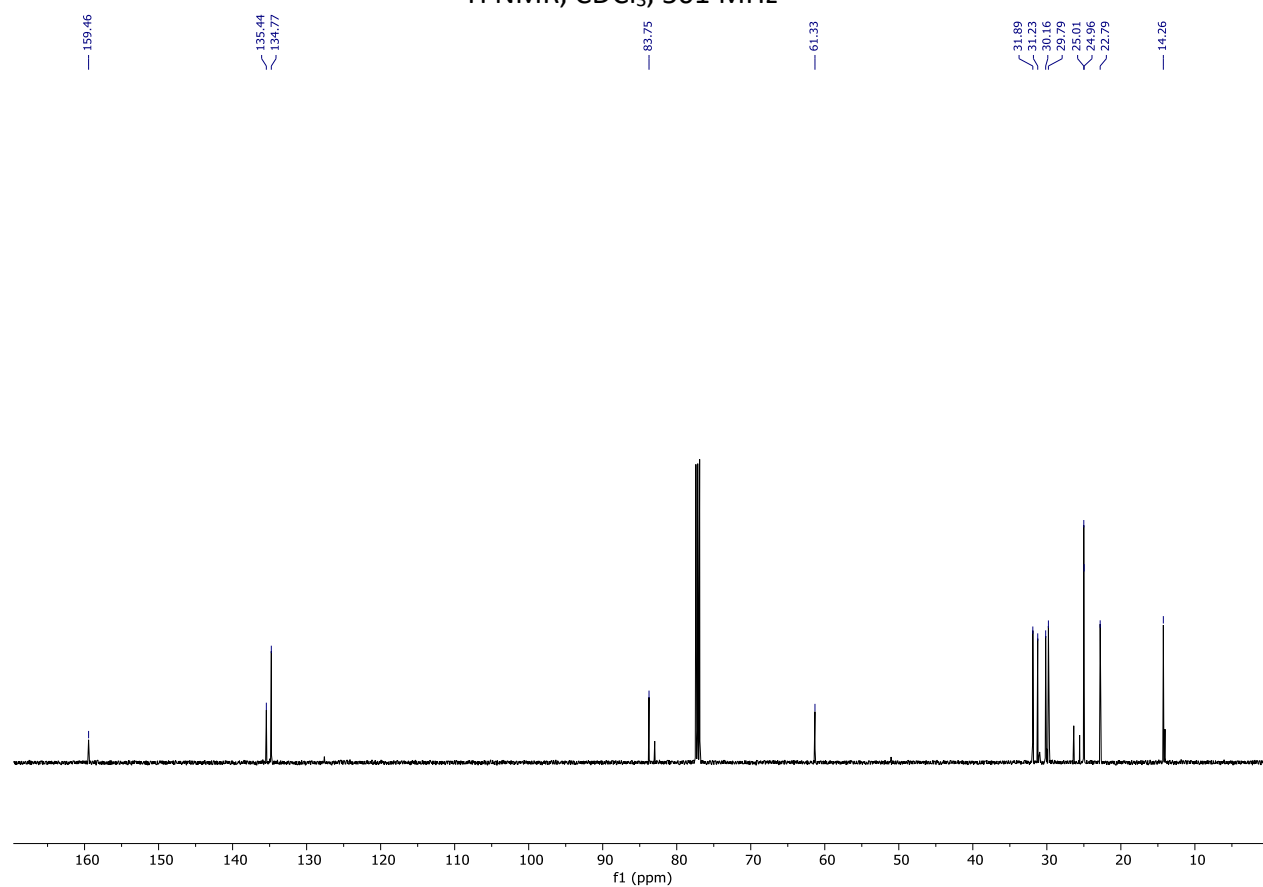

<sup>13</sup>C NMR, CDCl<sub>3</sub>, 126 MHz

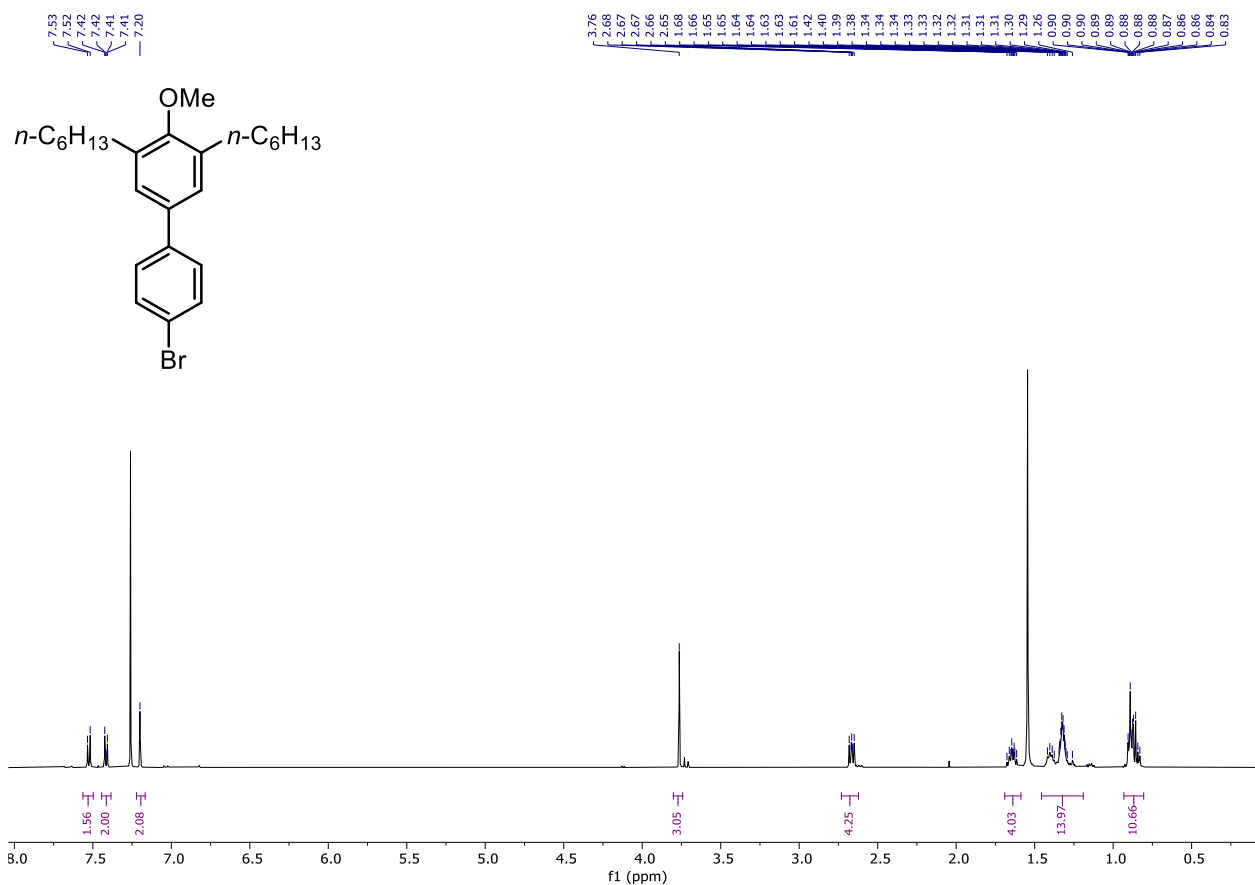

<sup>1</sup>H NMR, CDCl<sub>3</sub>, 501 MHz

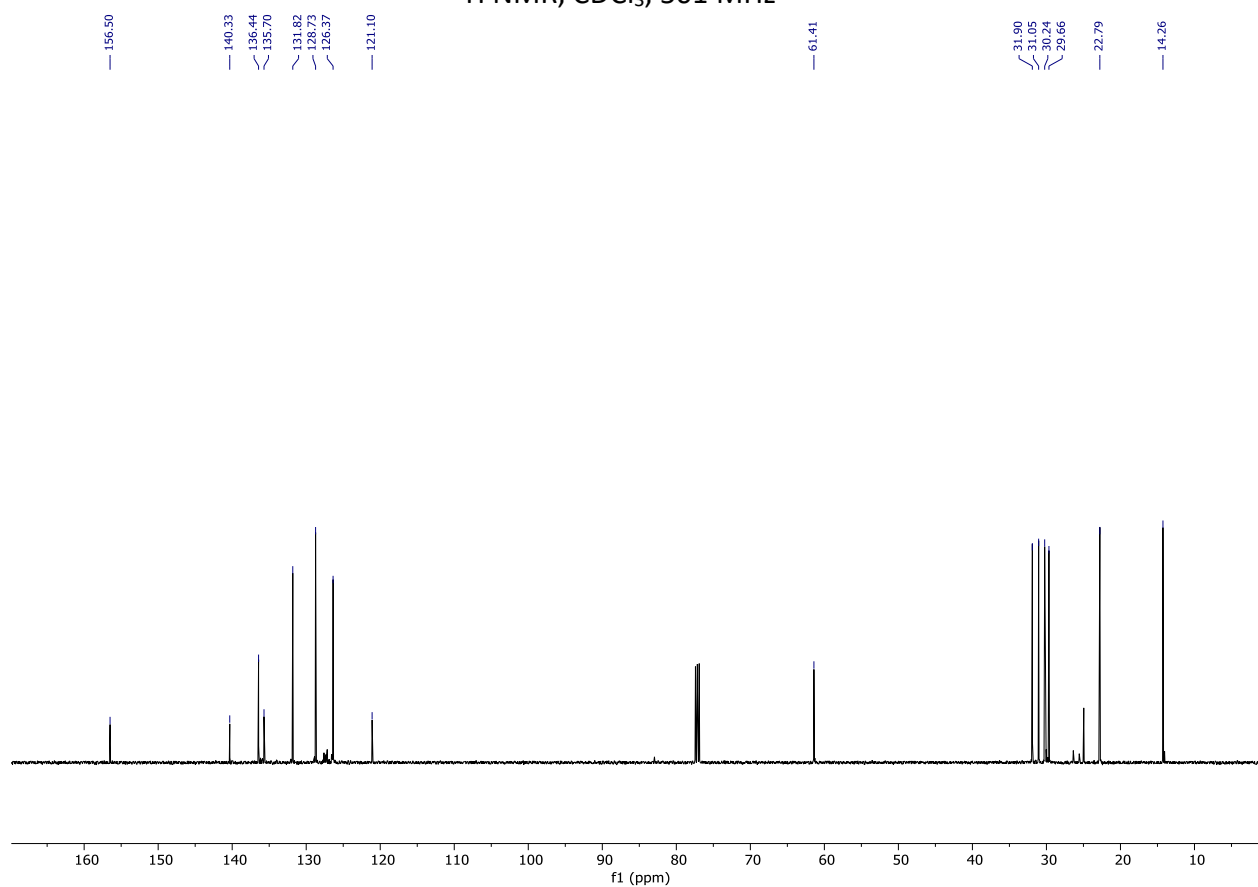

<sup>13</sup>C NMR, CDCl<sub>3</sub>, 126 MHz

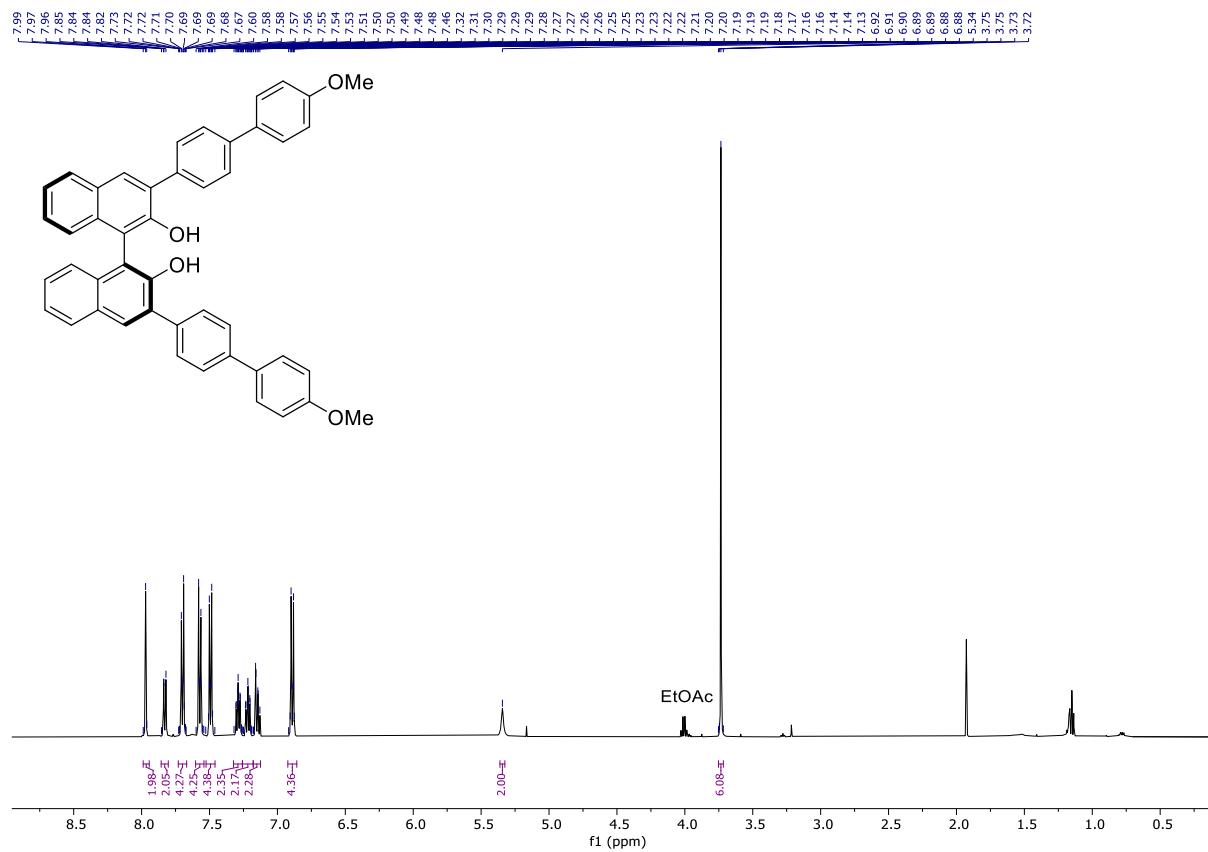

<sup>1</sup>H NMR, CDCl<sub>3</sub>, 501 MHz

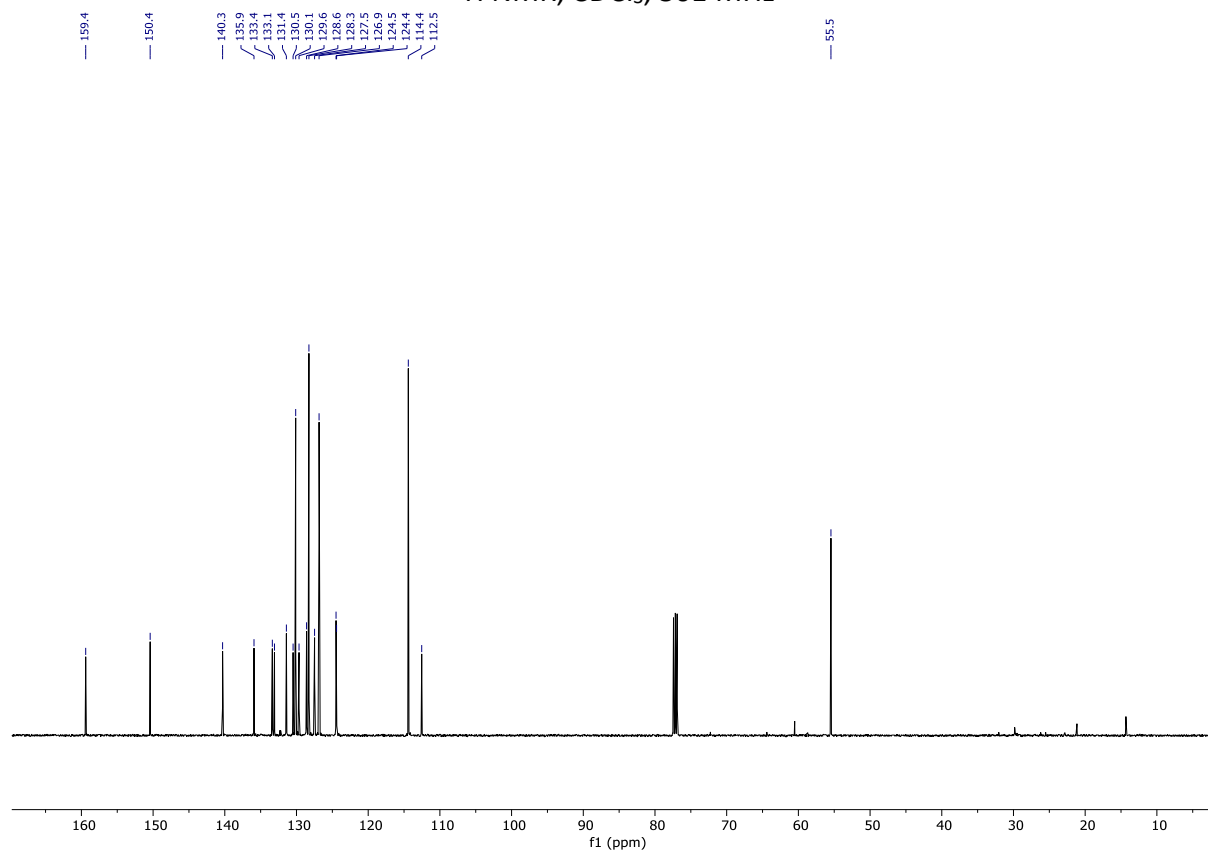

<sup>13</sup>C NMR, CDCl<sub>3</sub>, 126 MHz

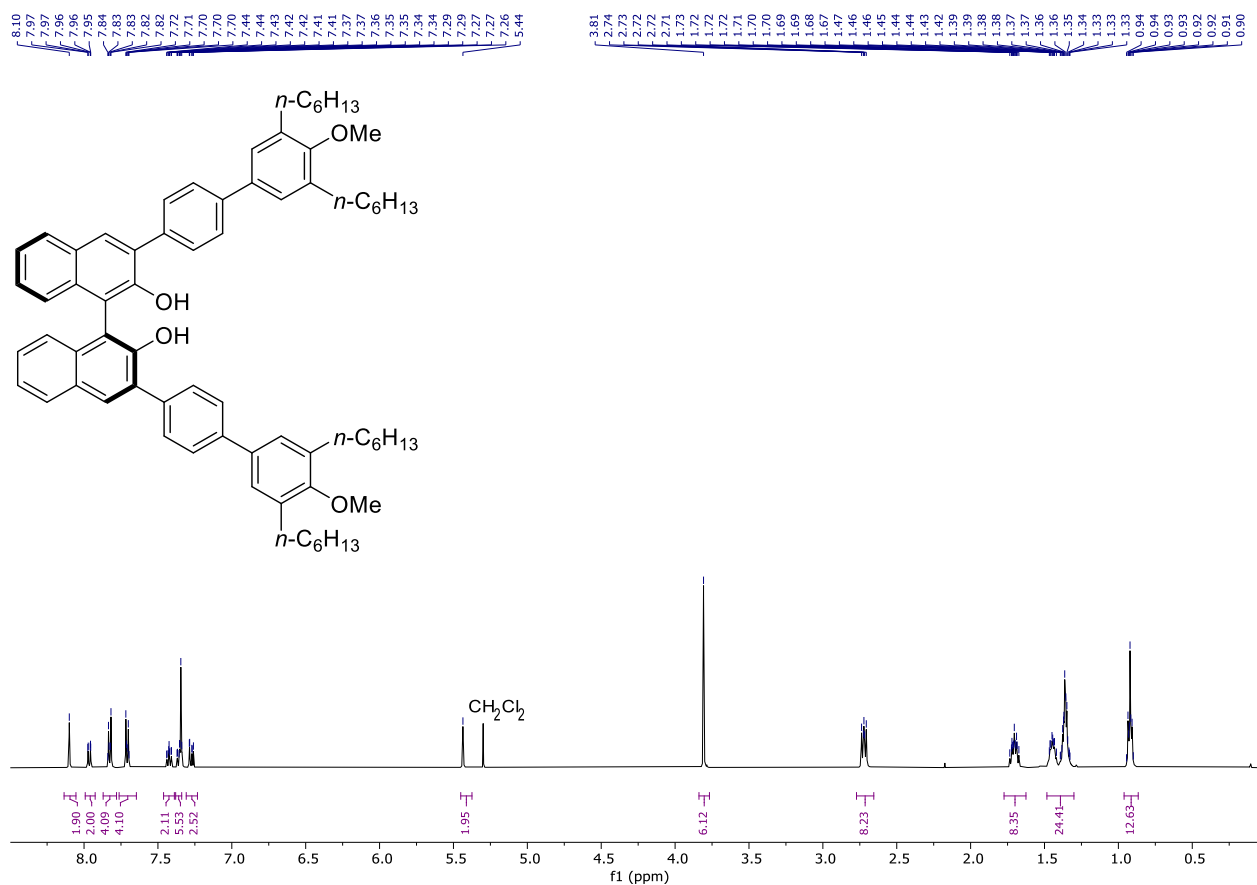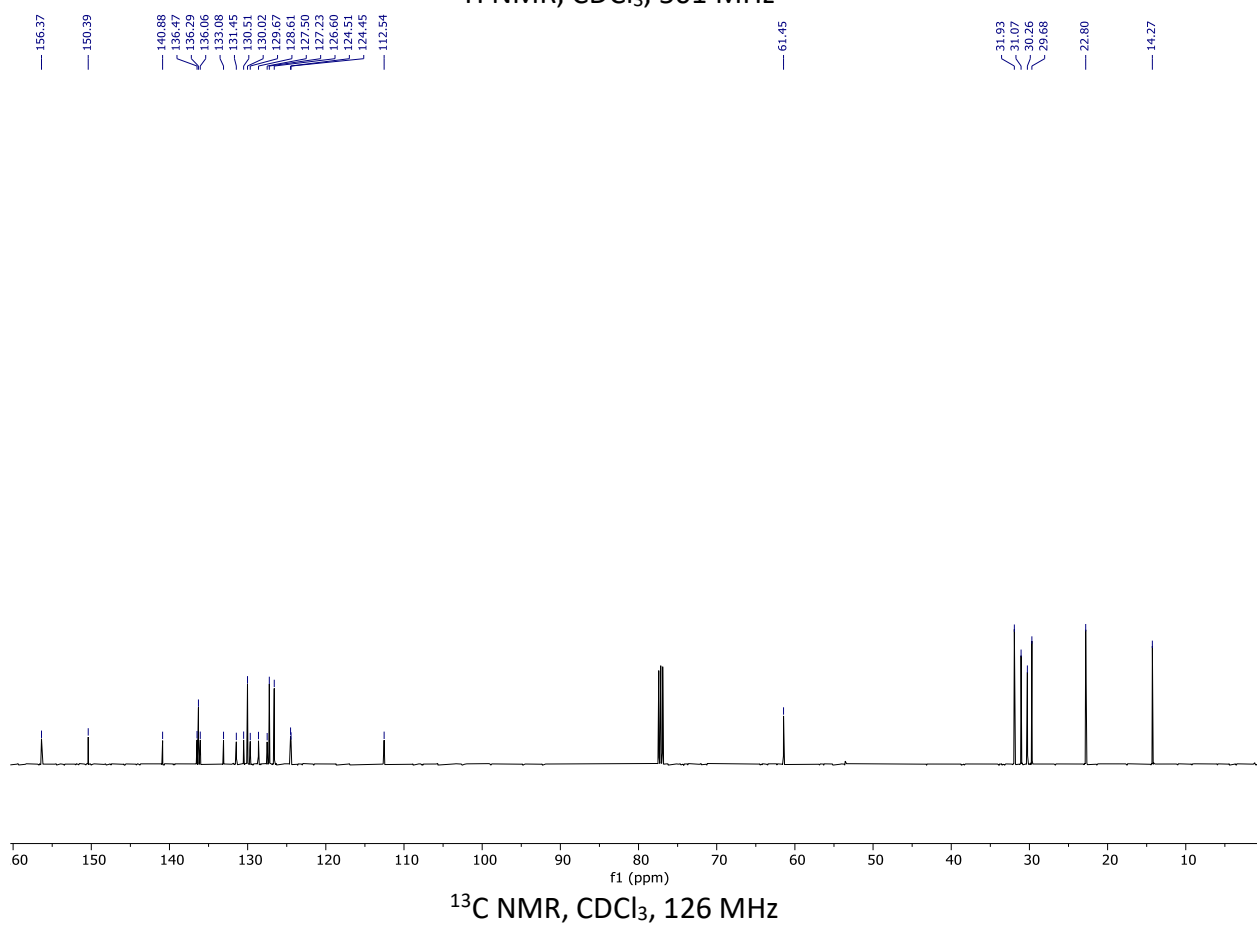

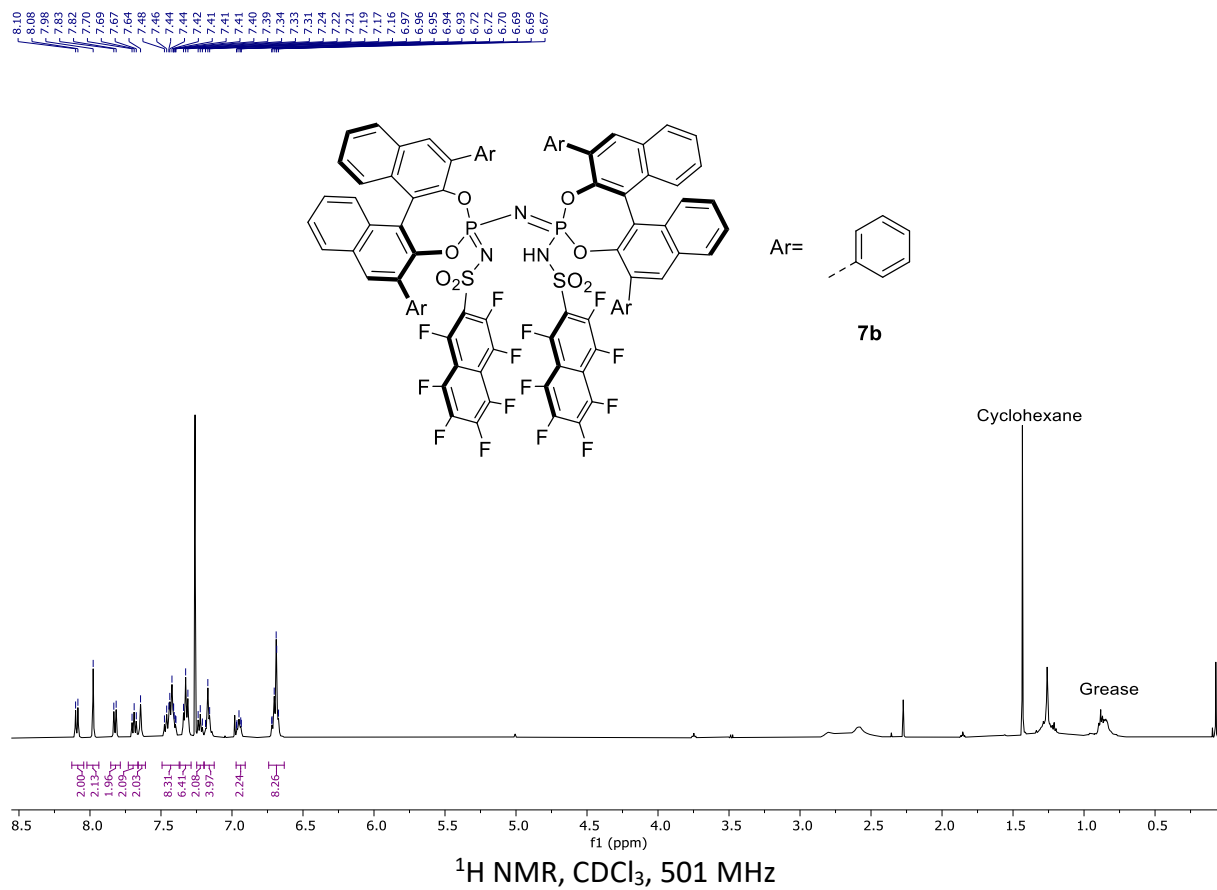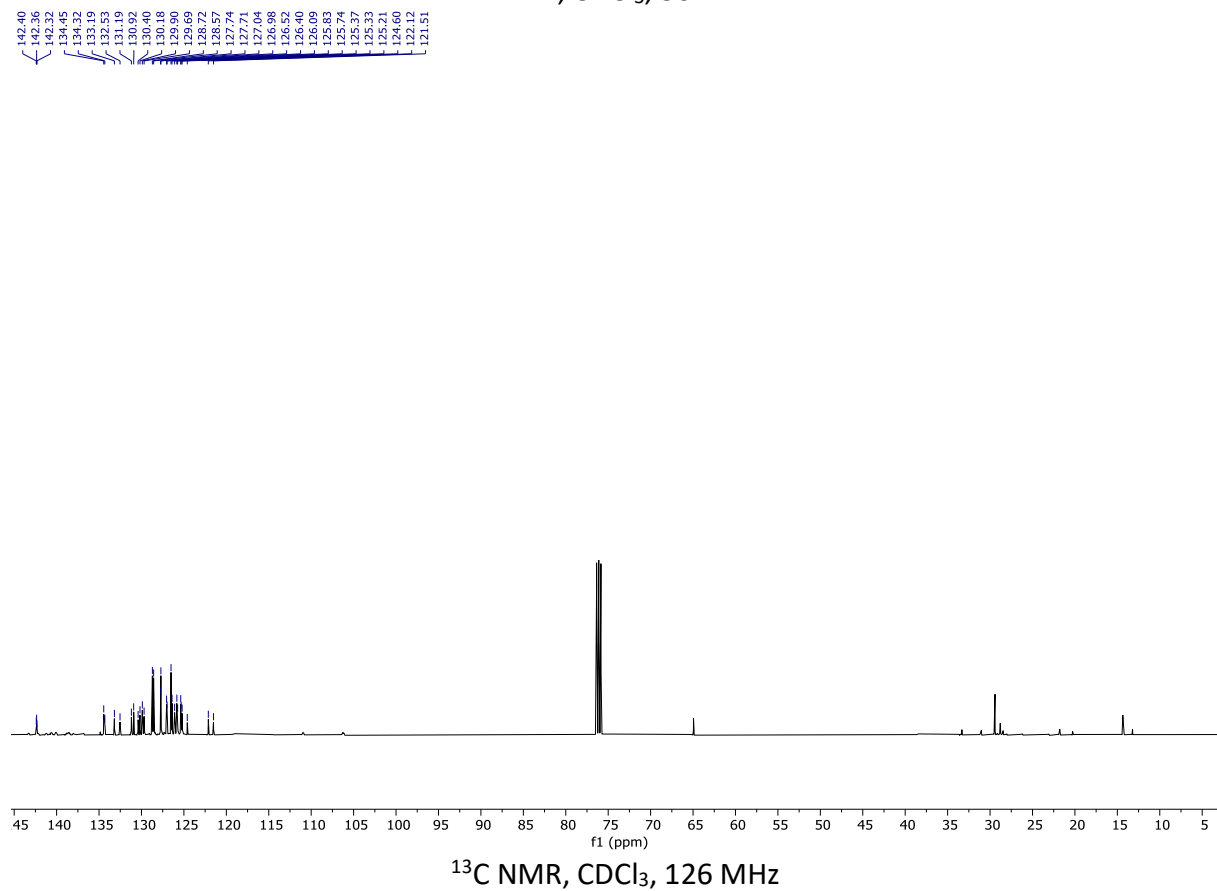

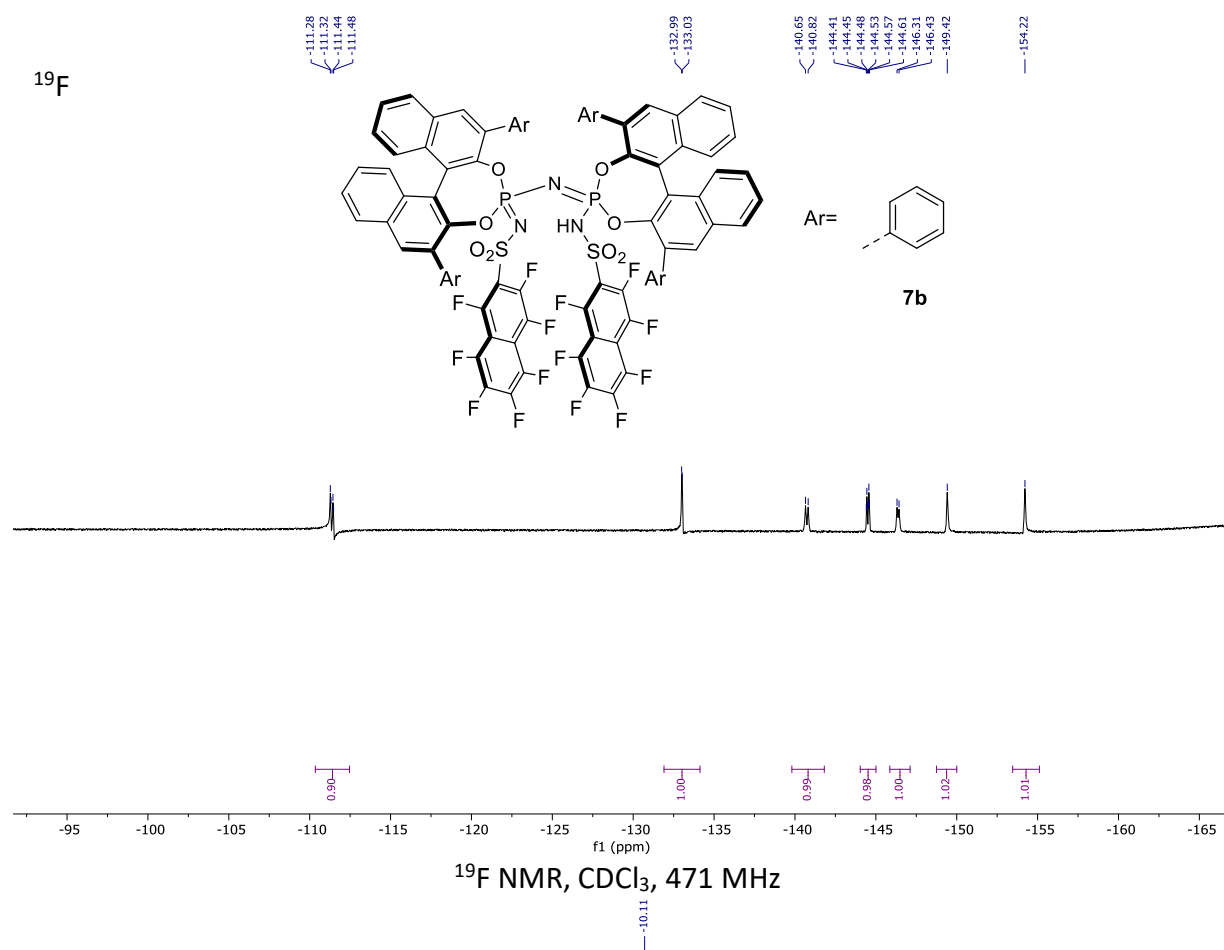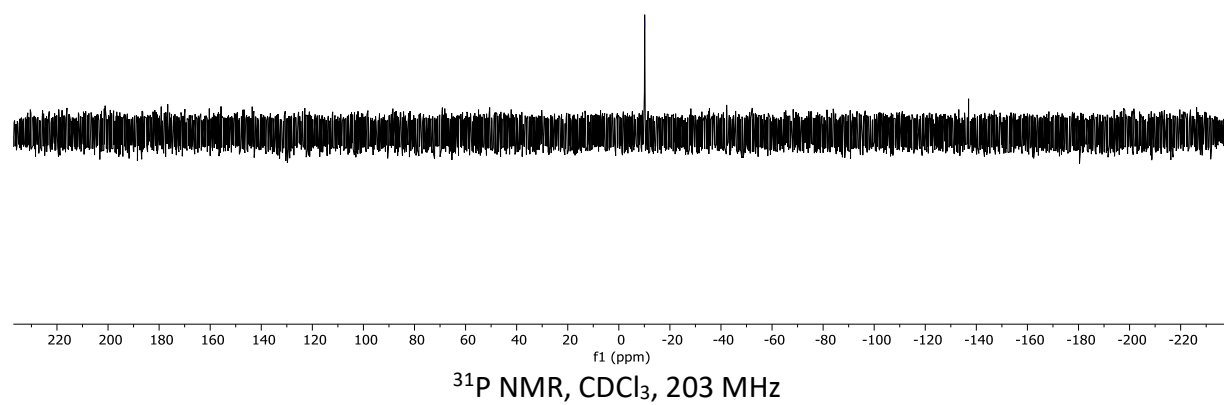

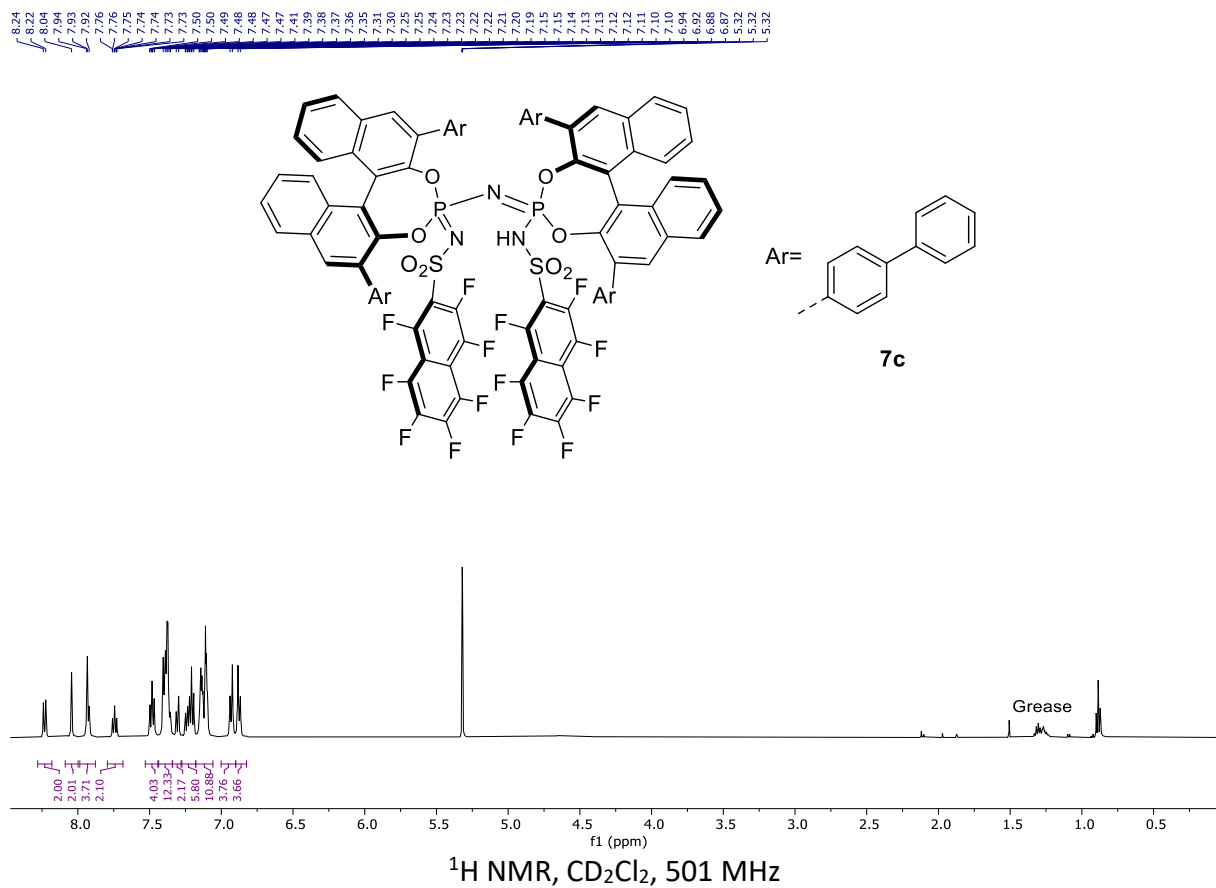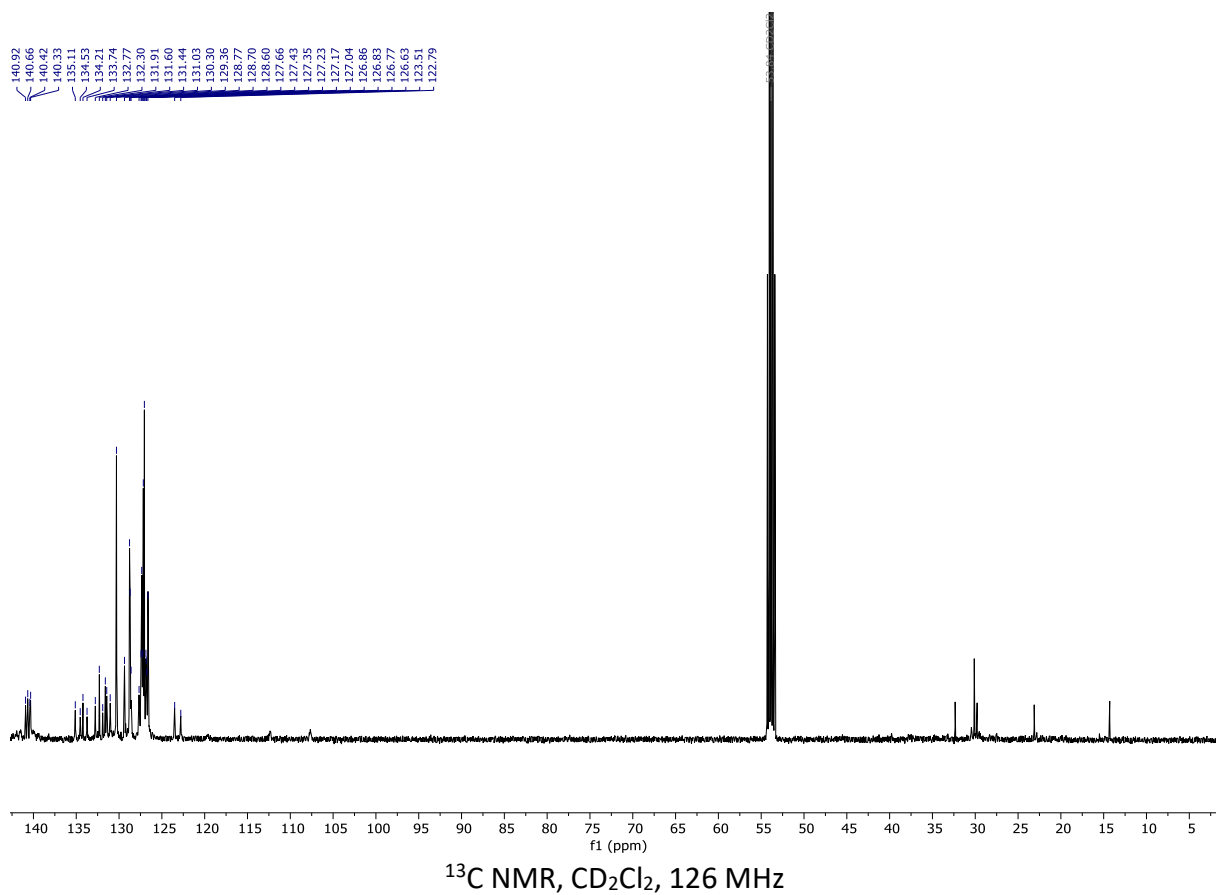

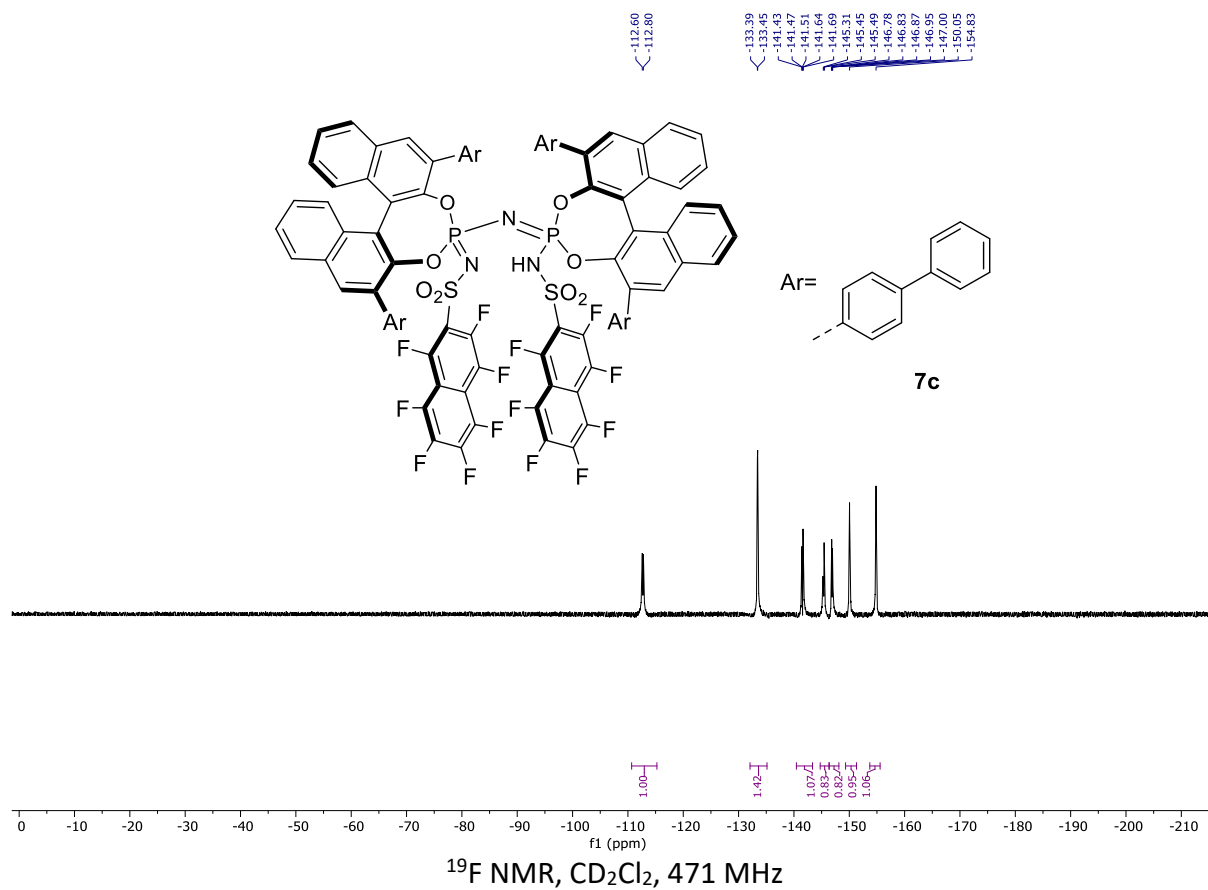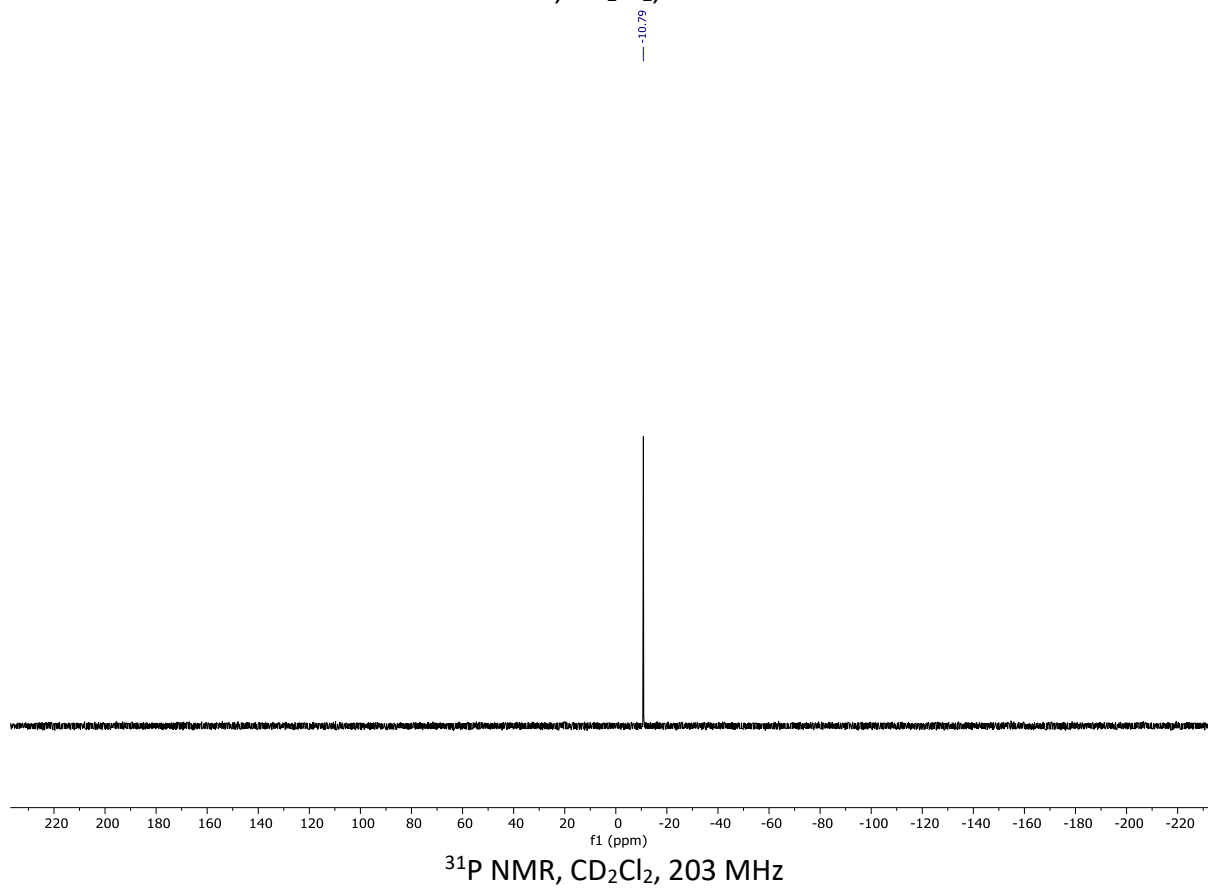

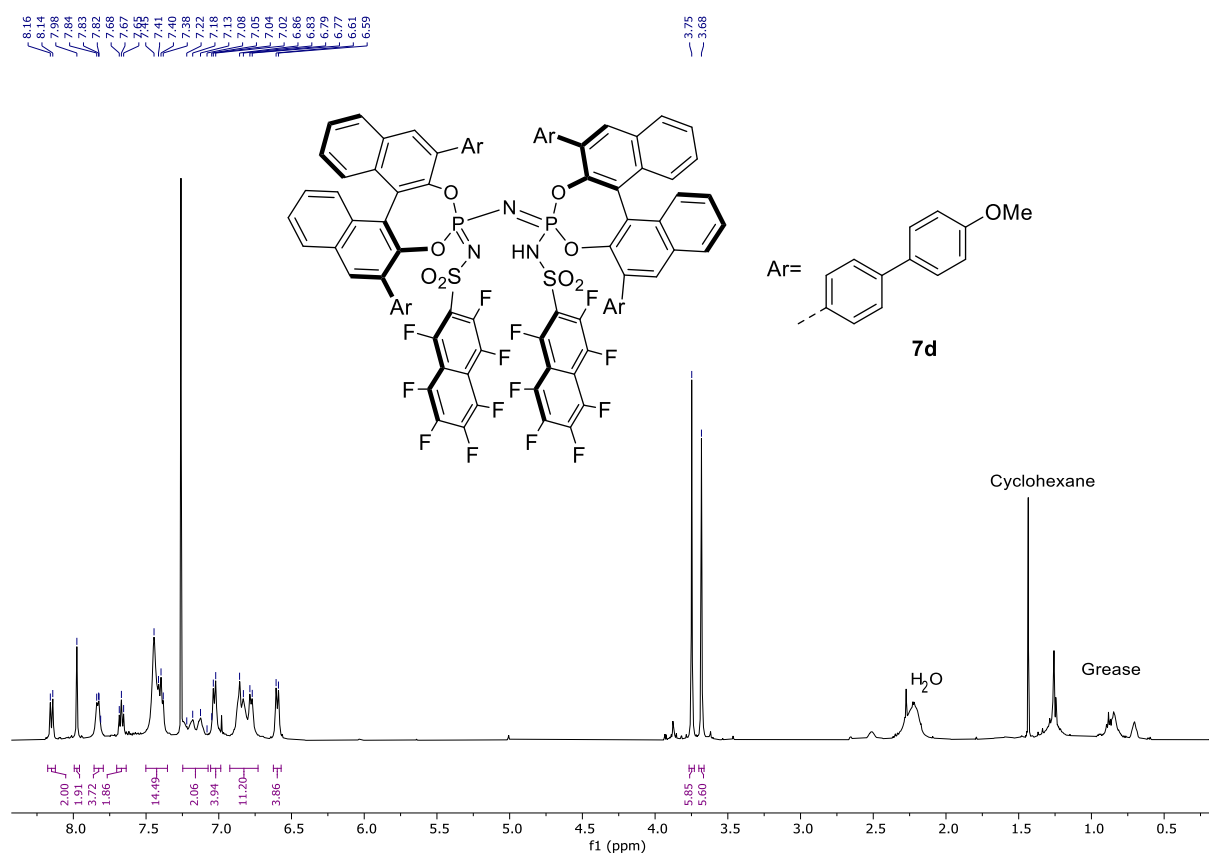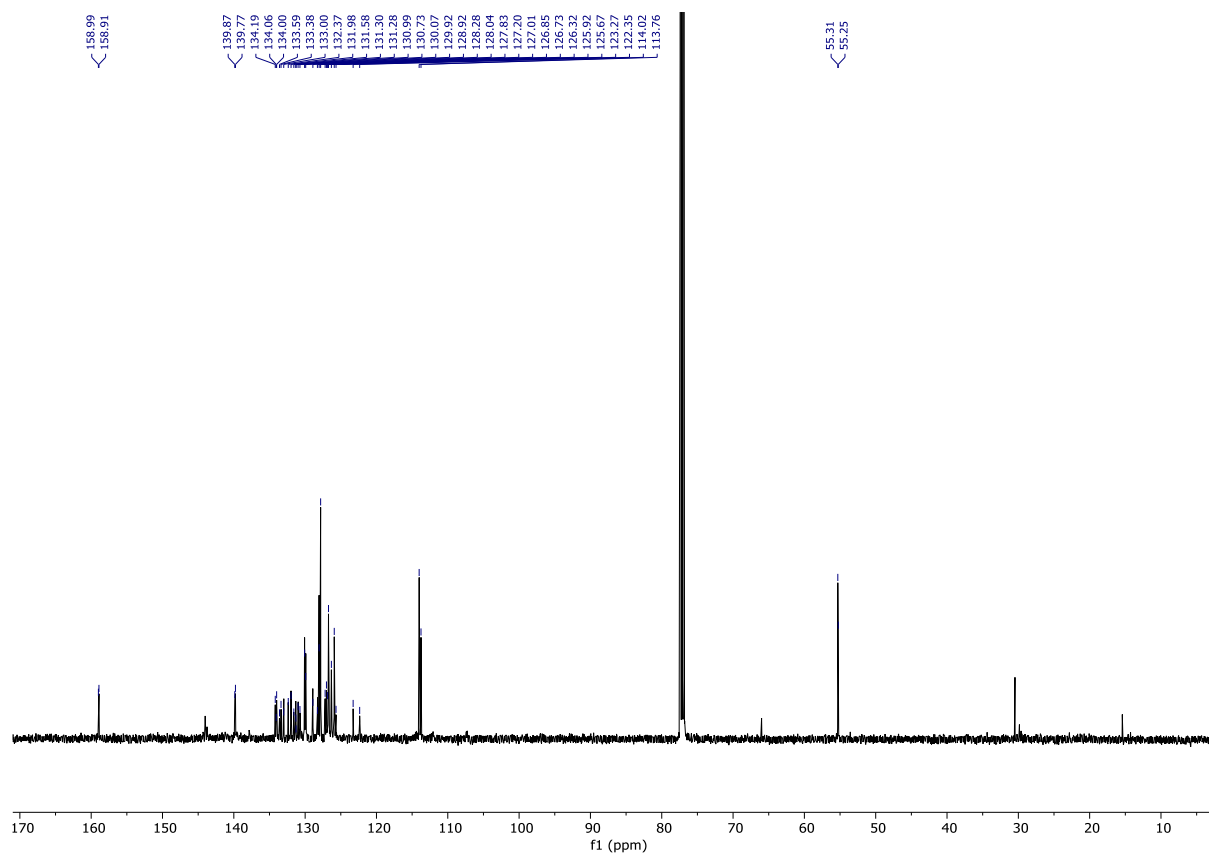

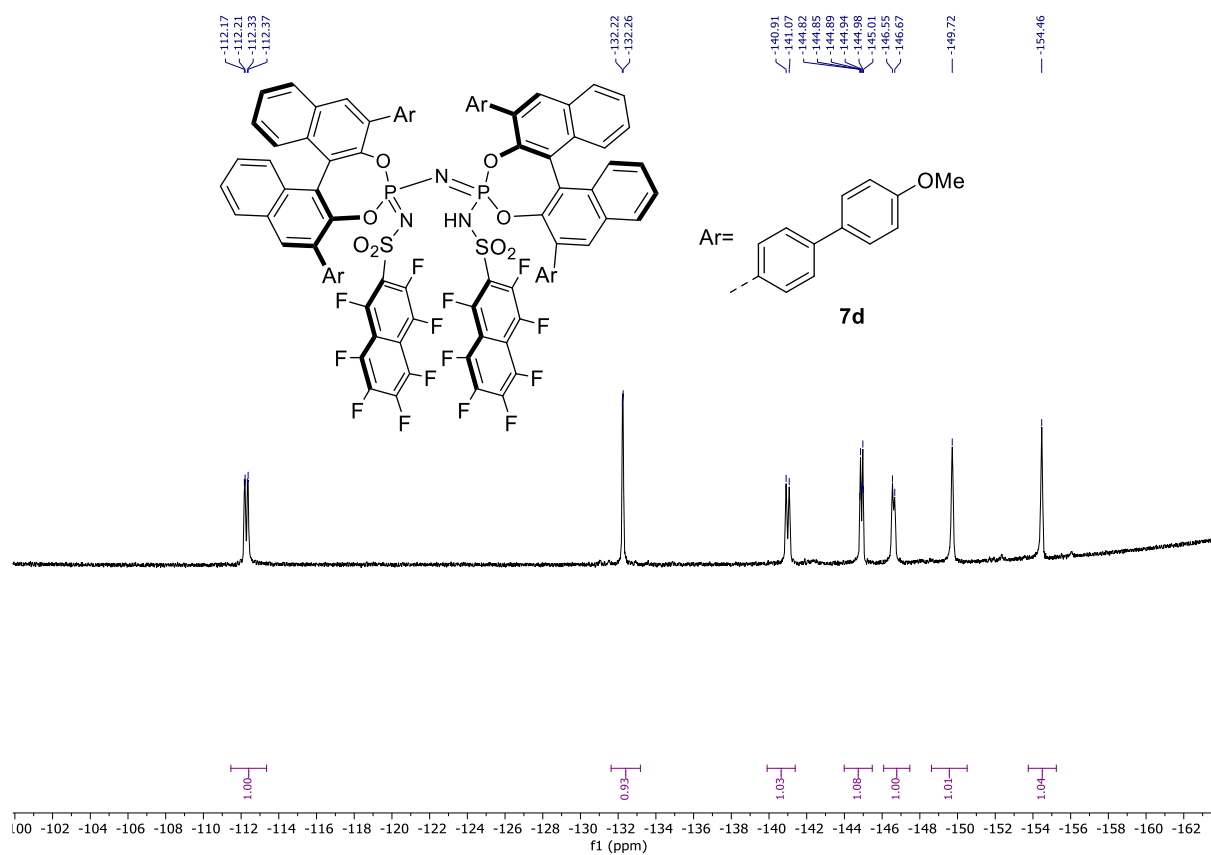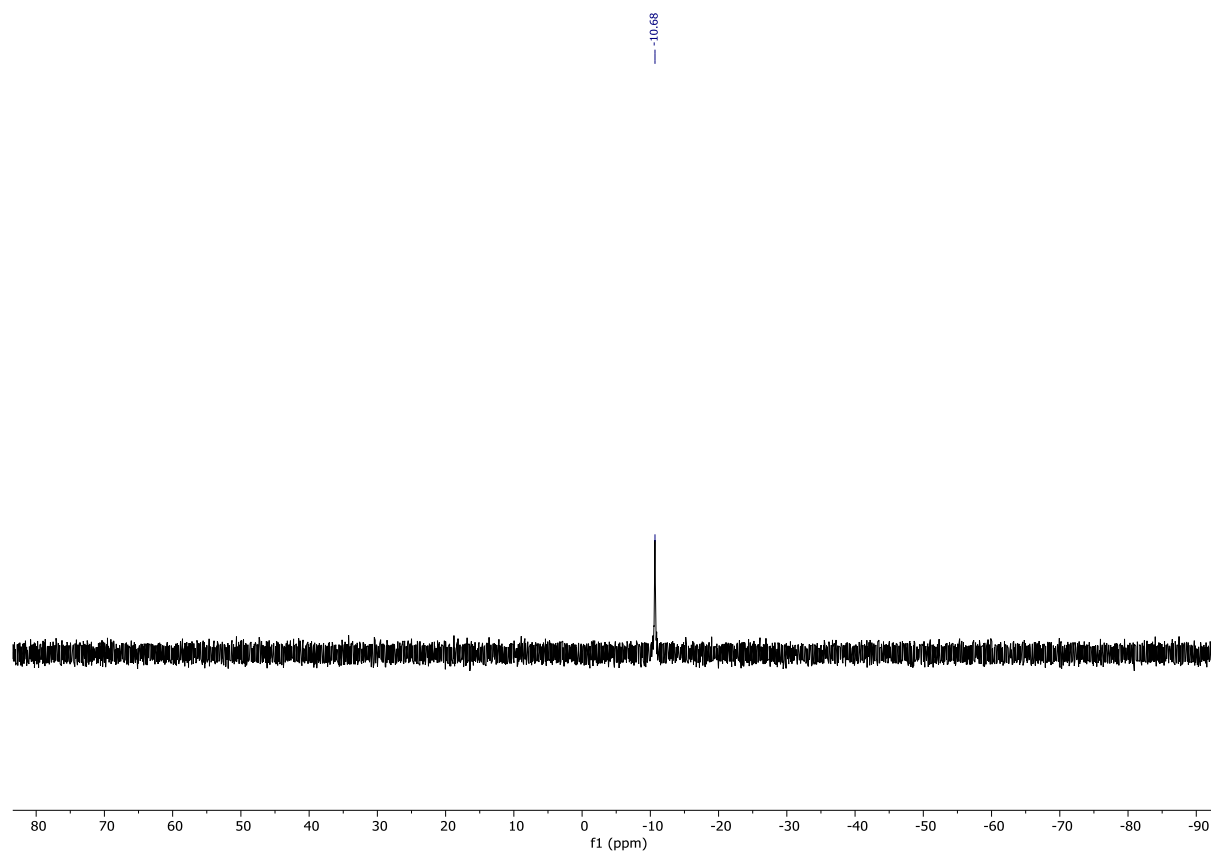

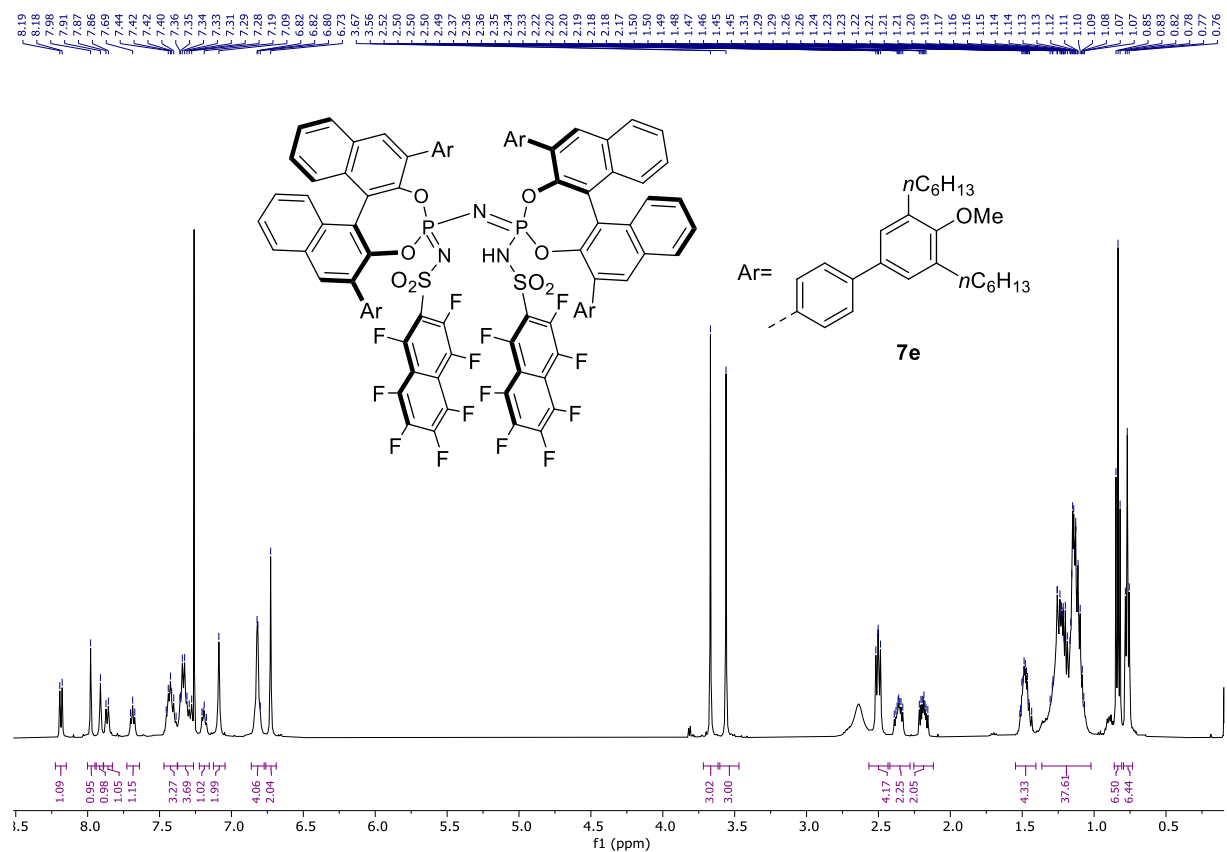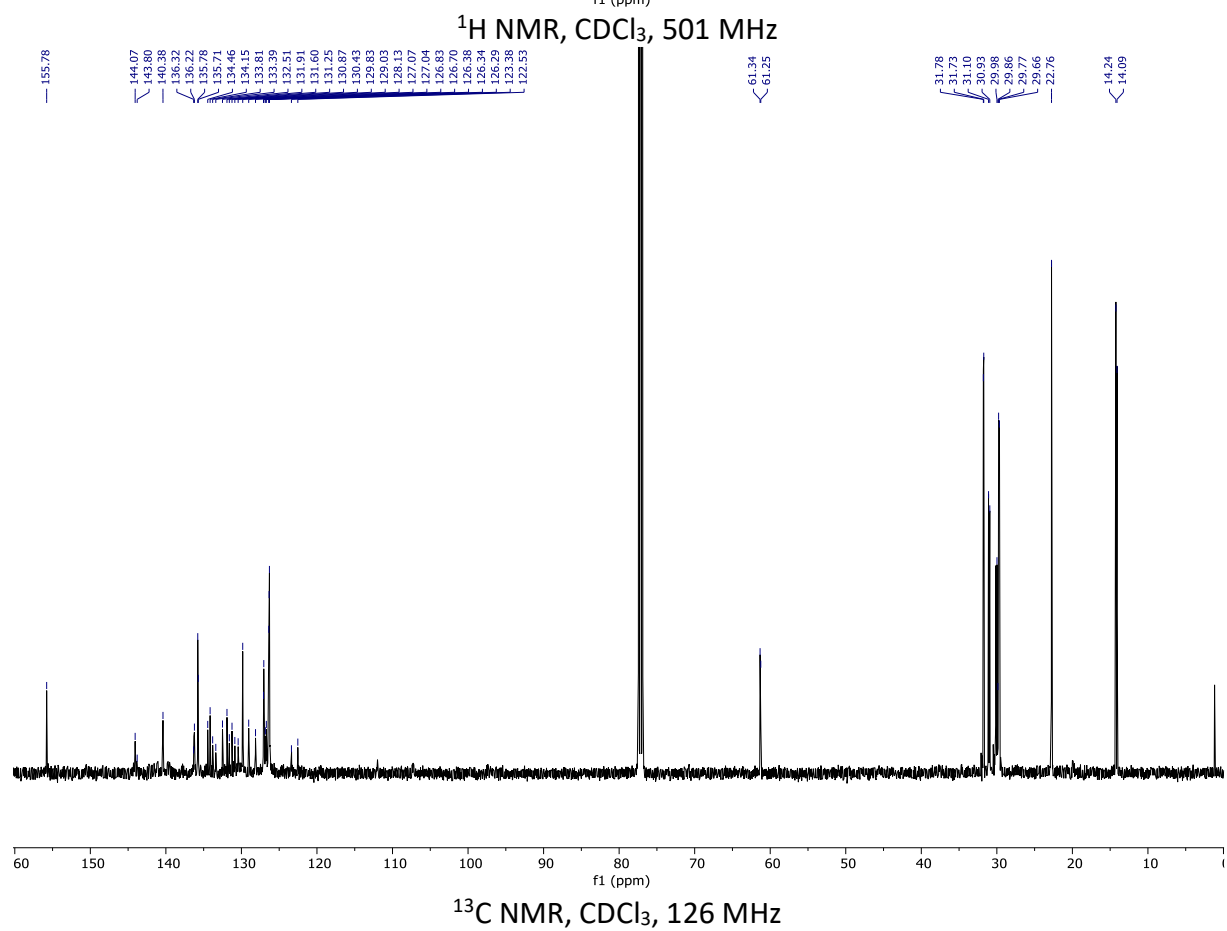

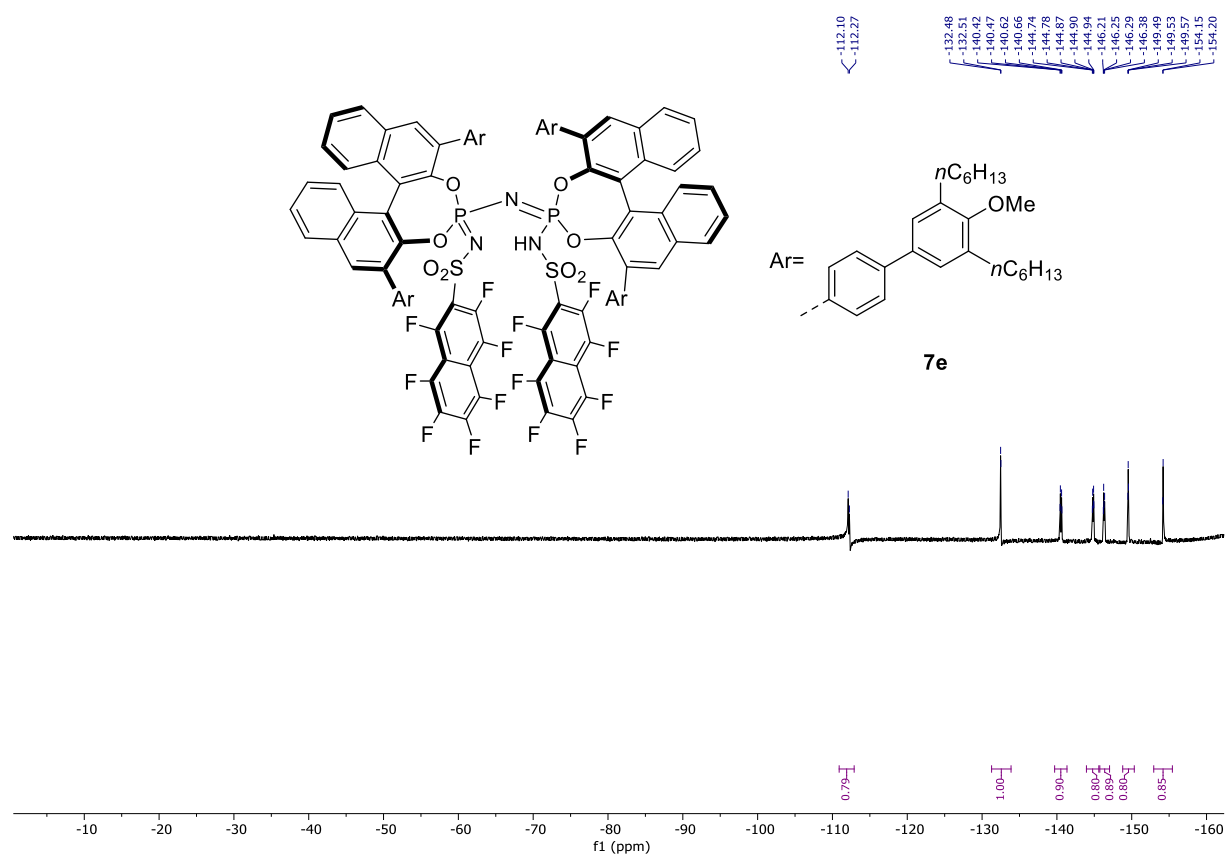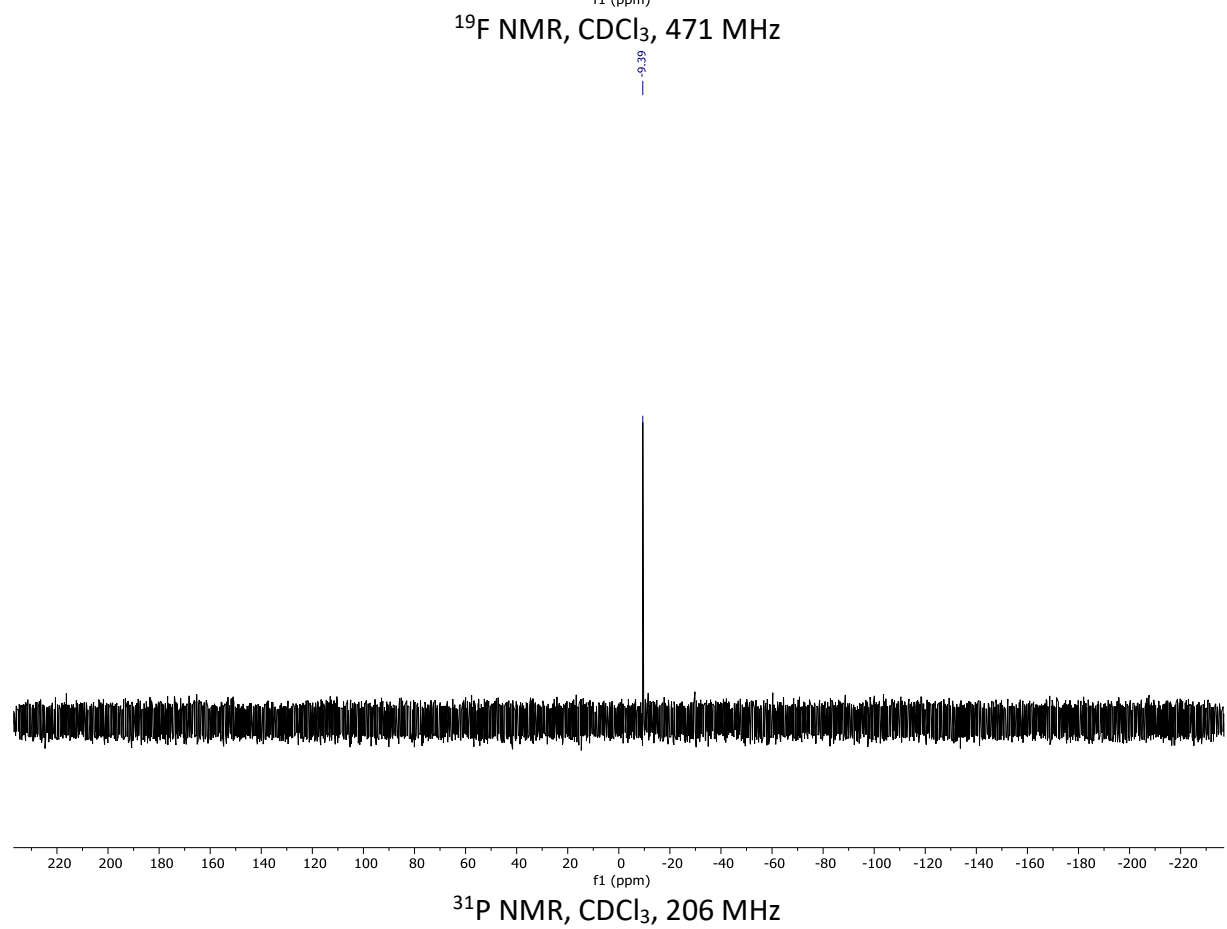

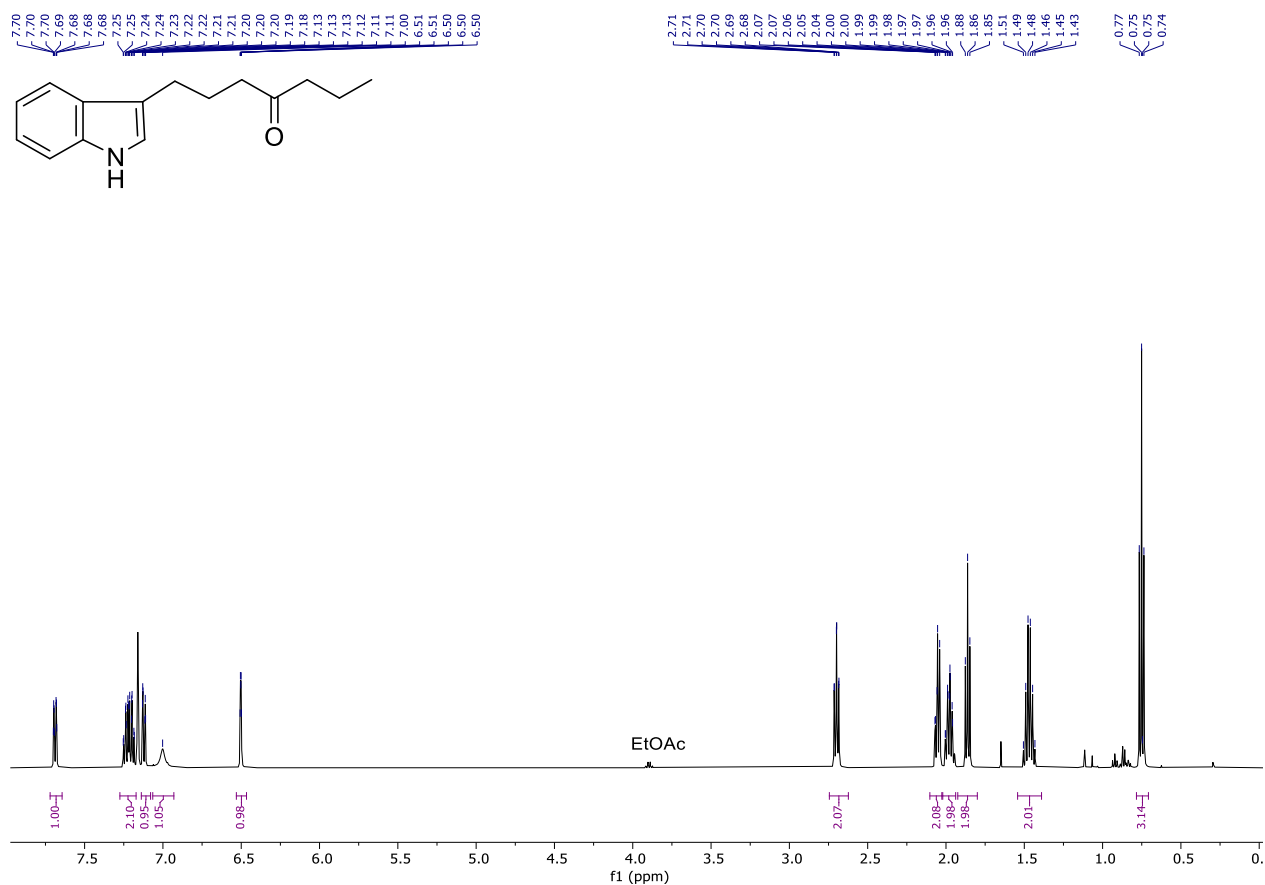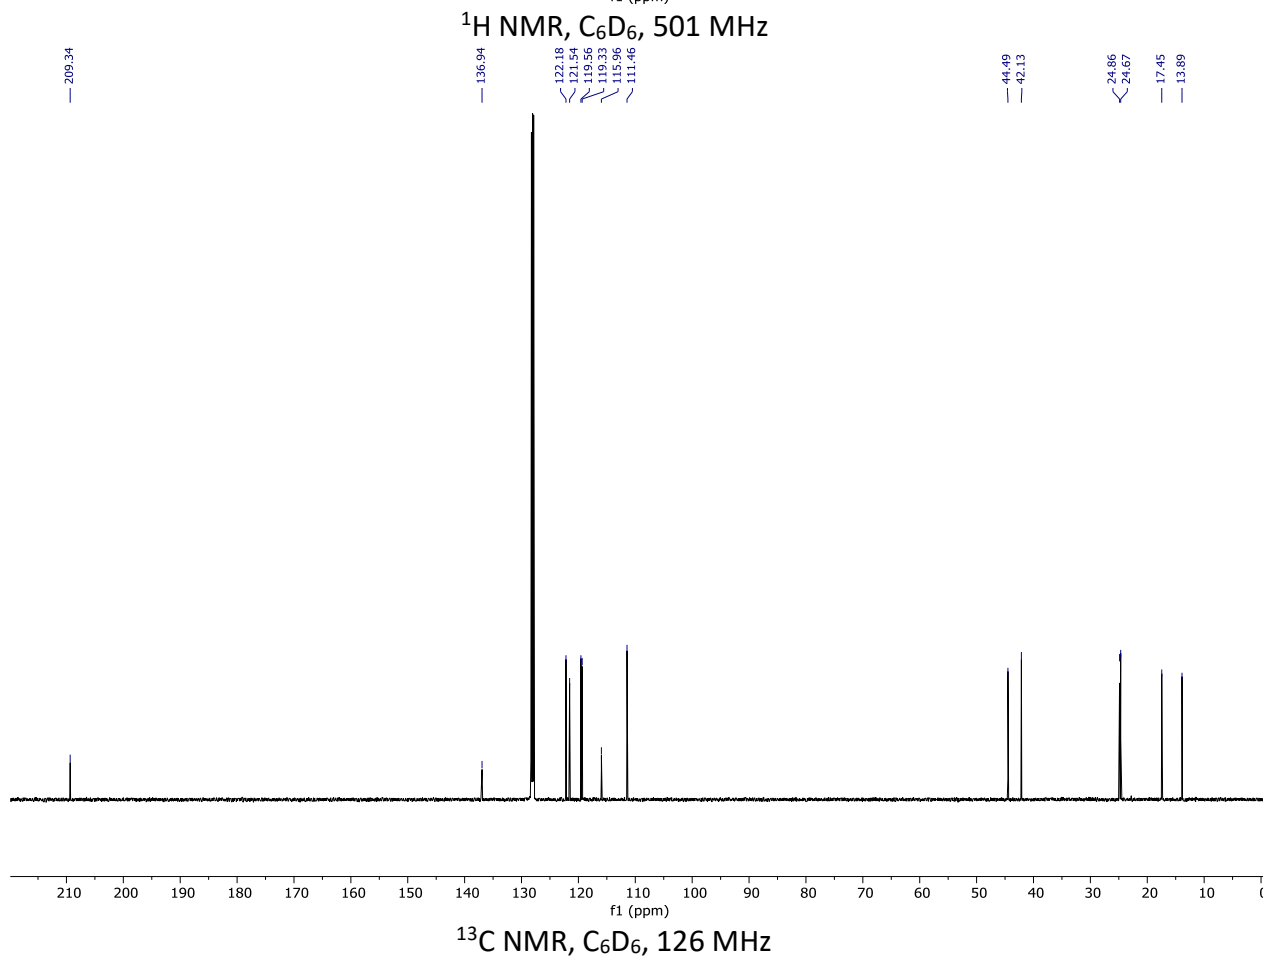

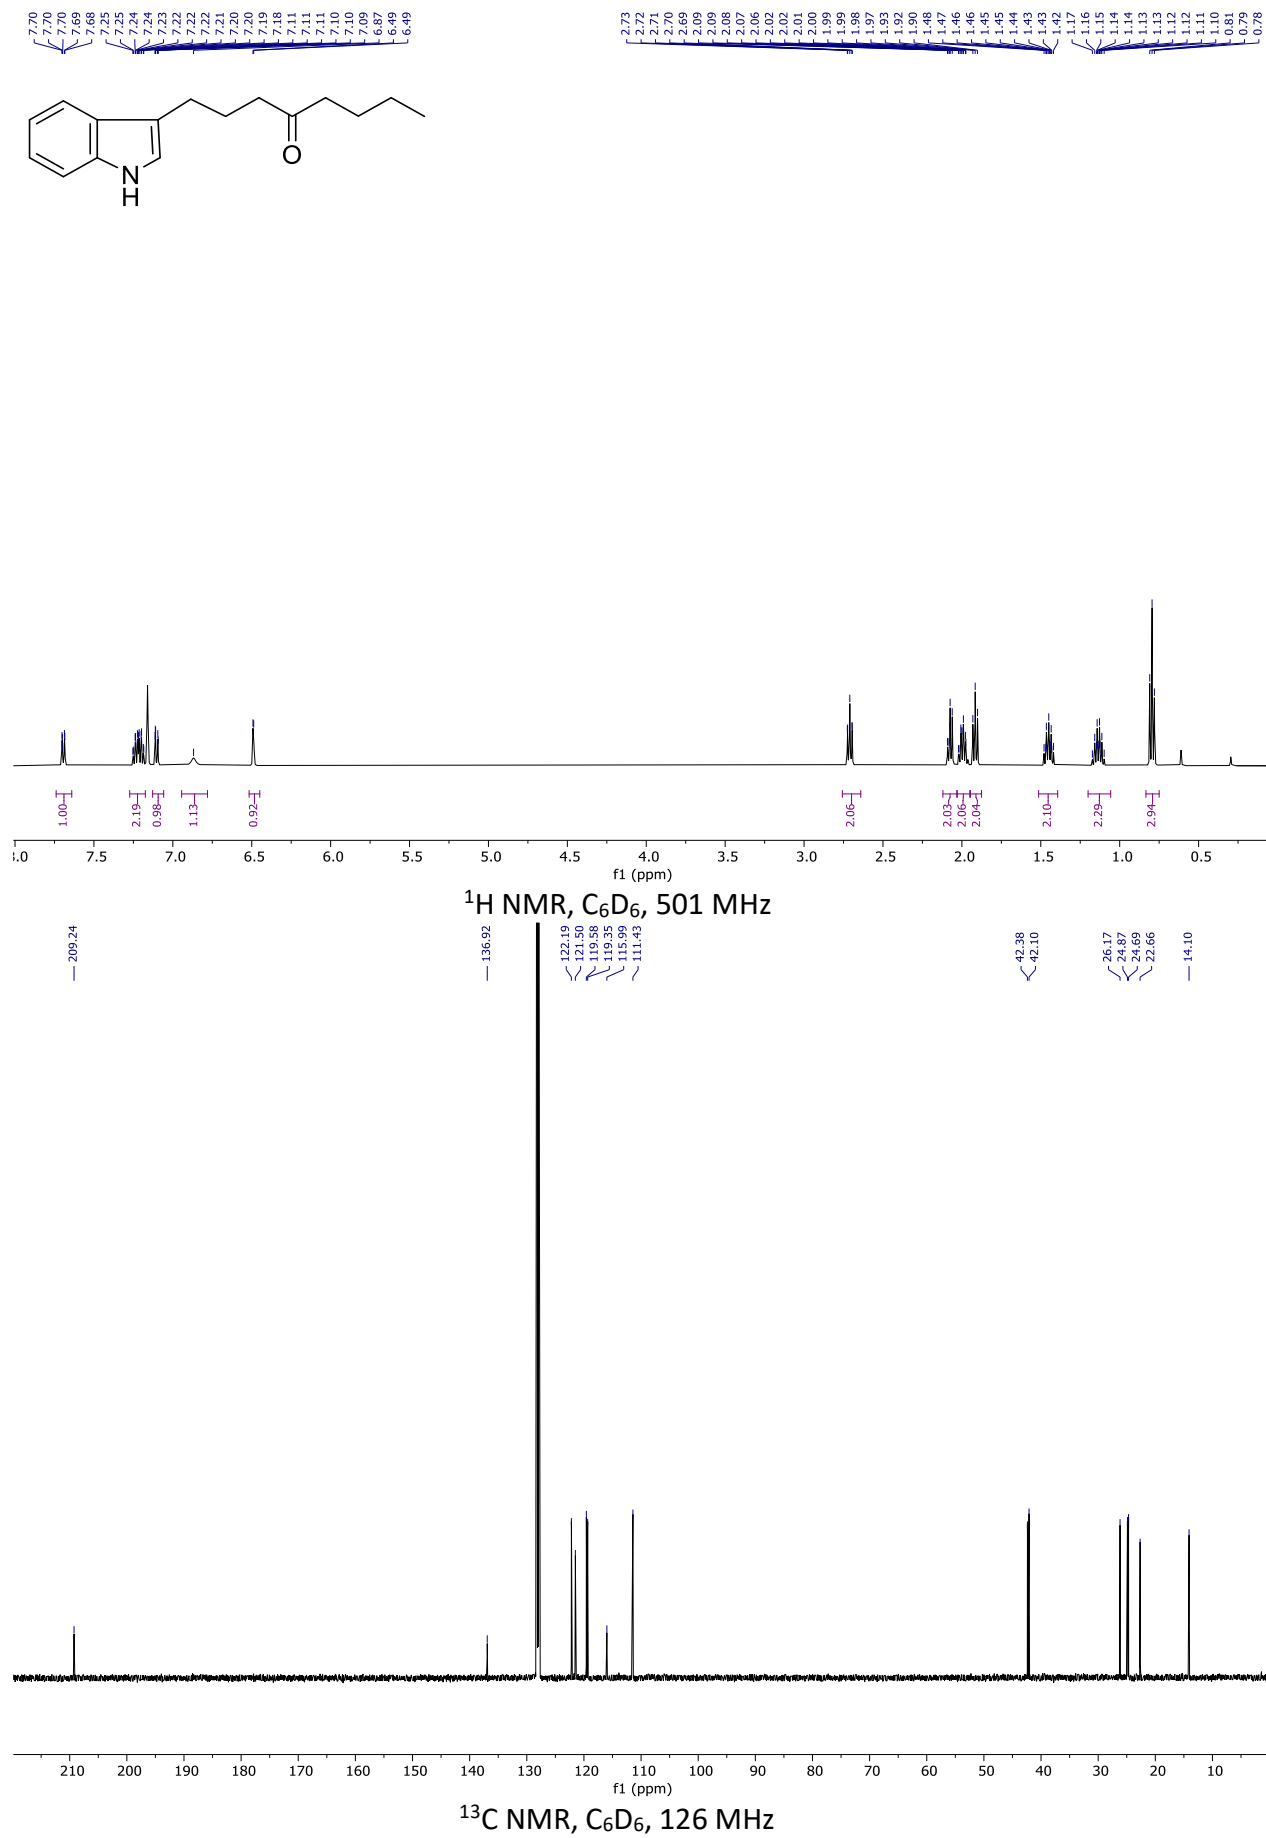

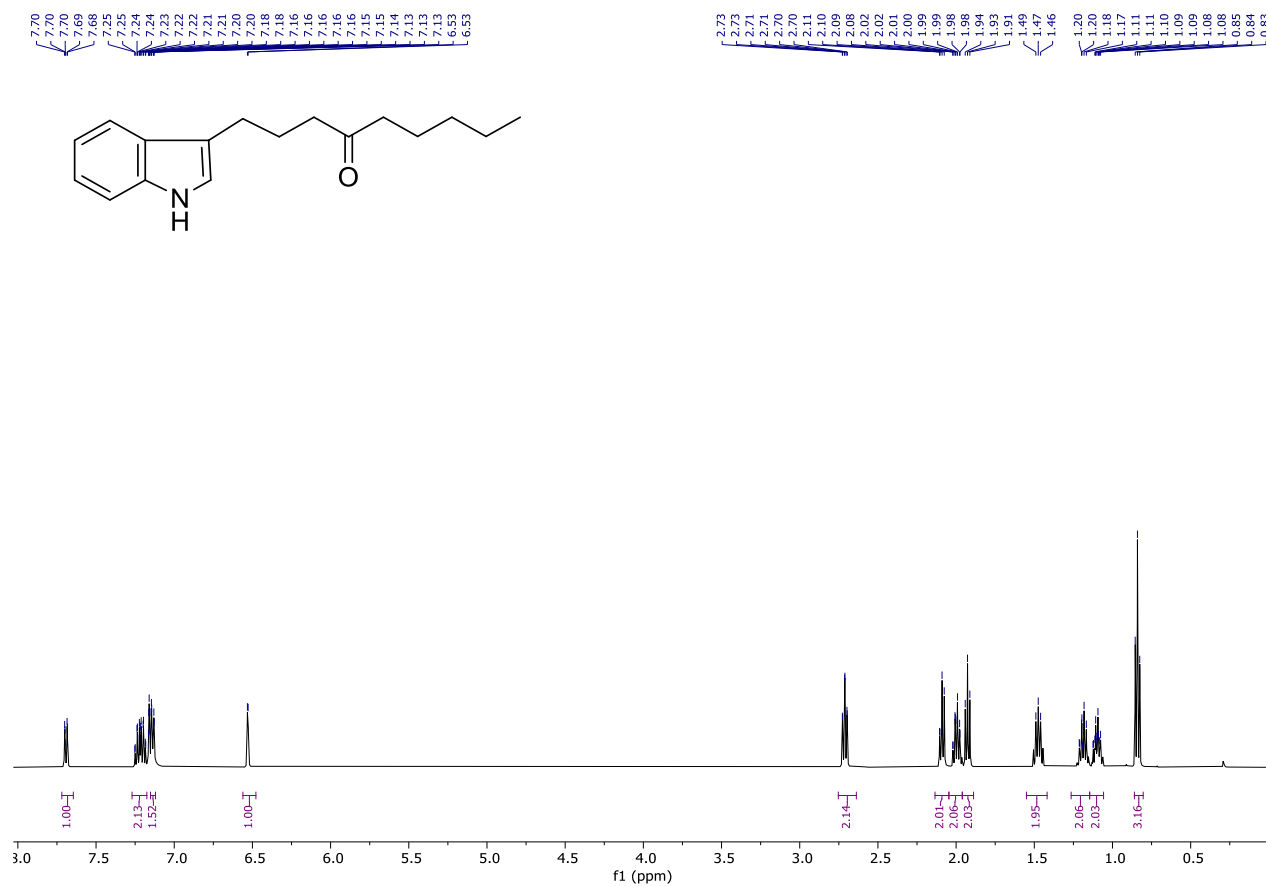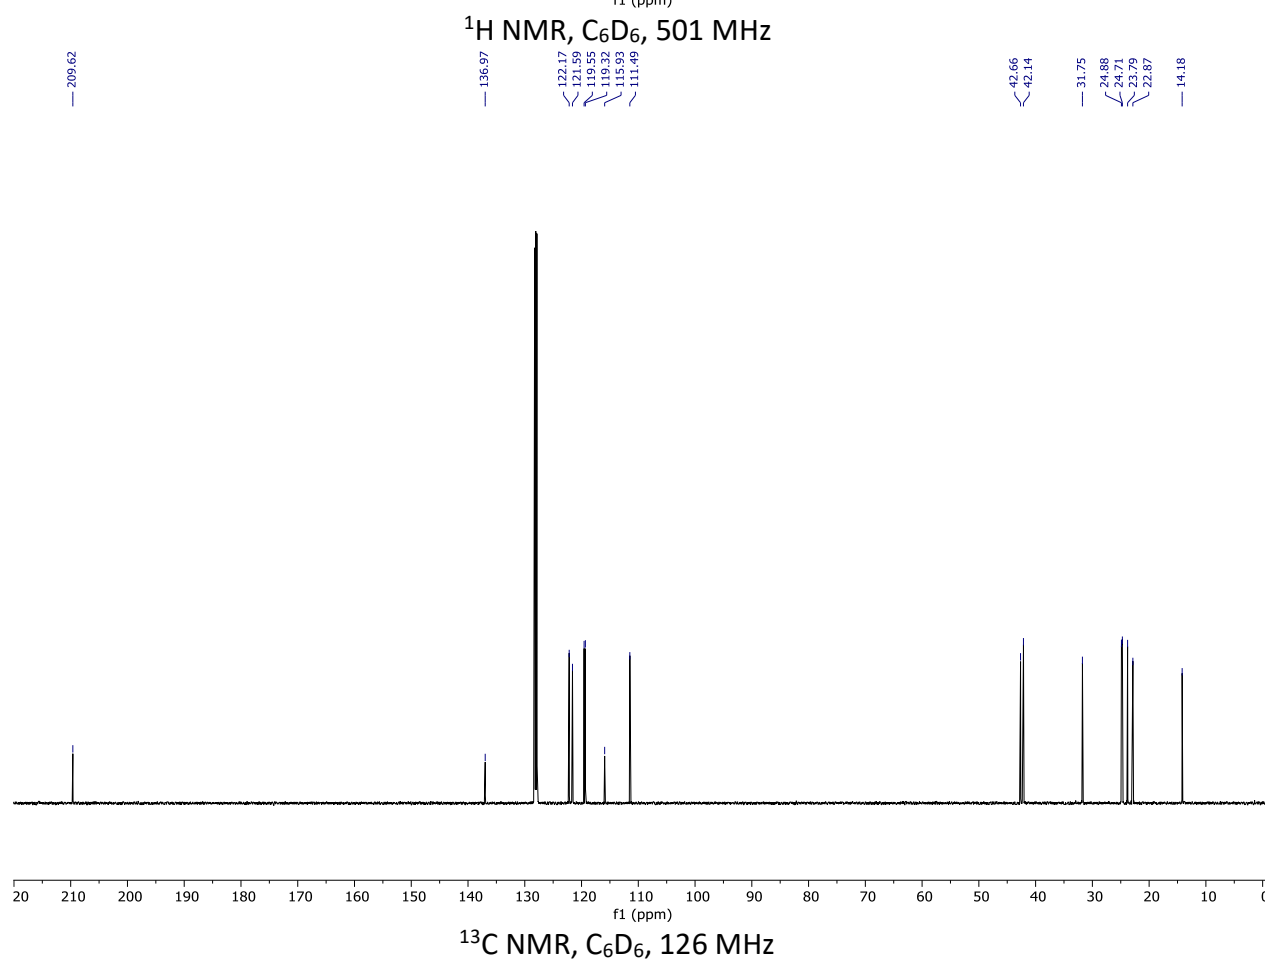

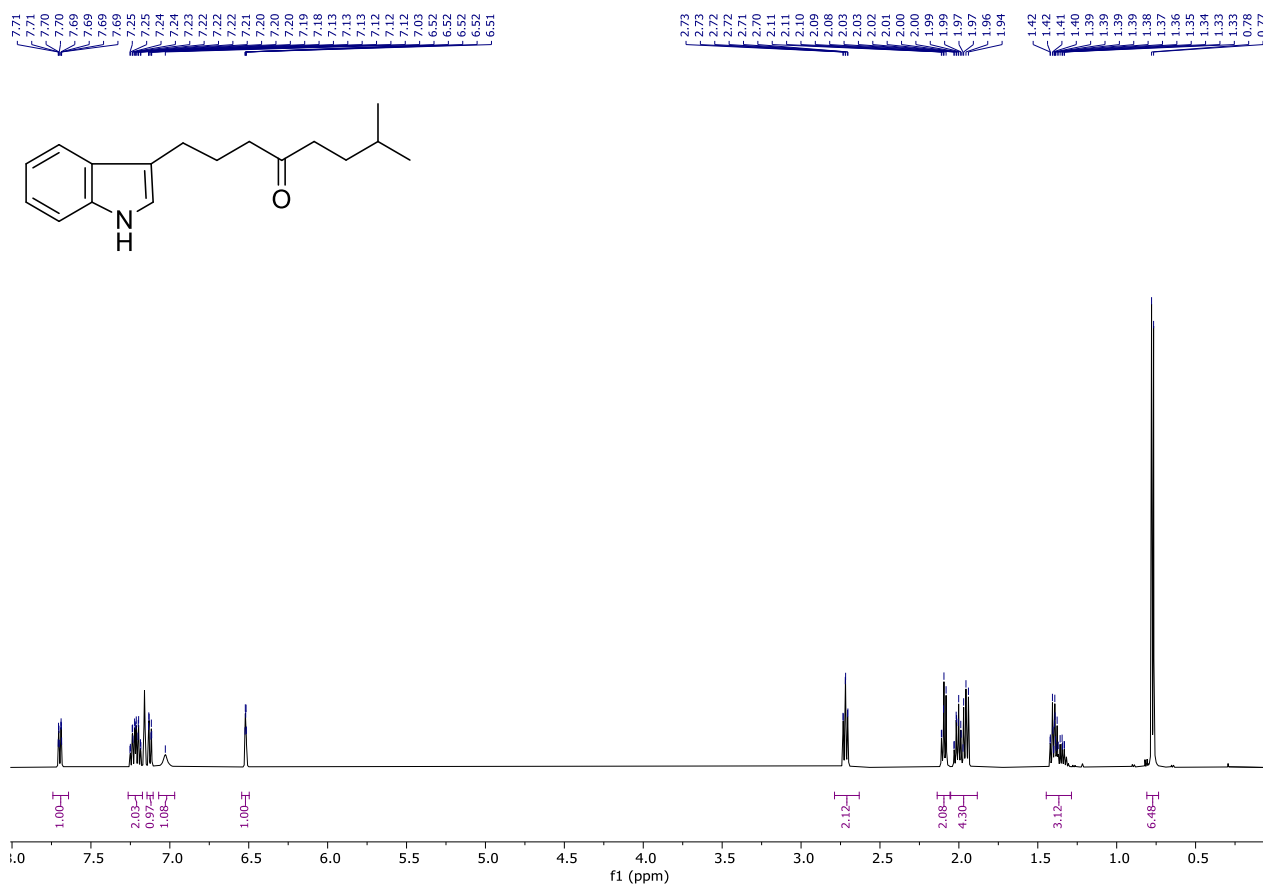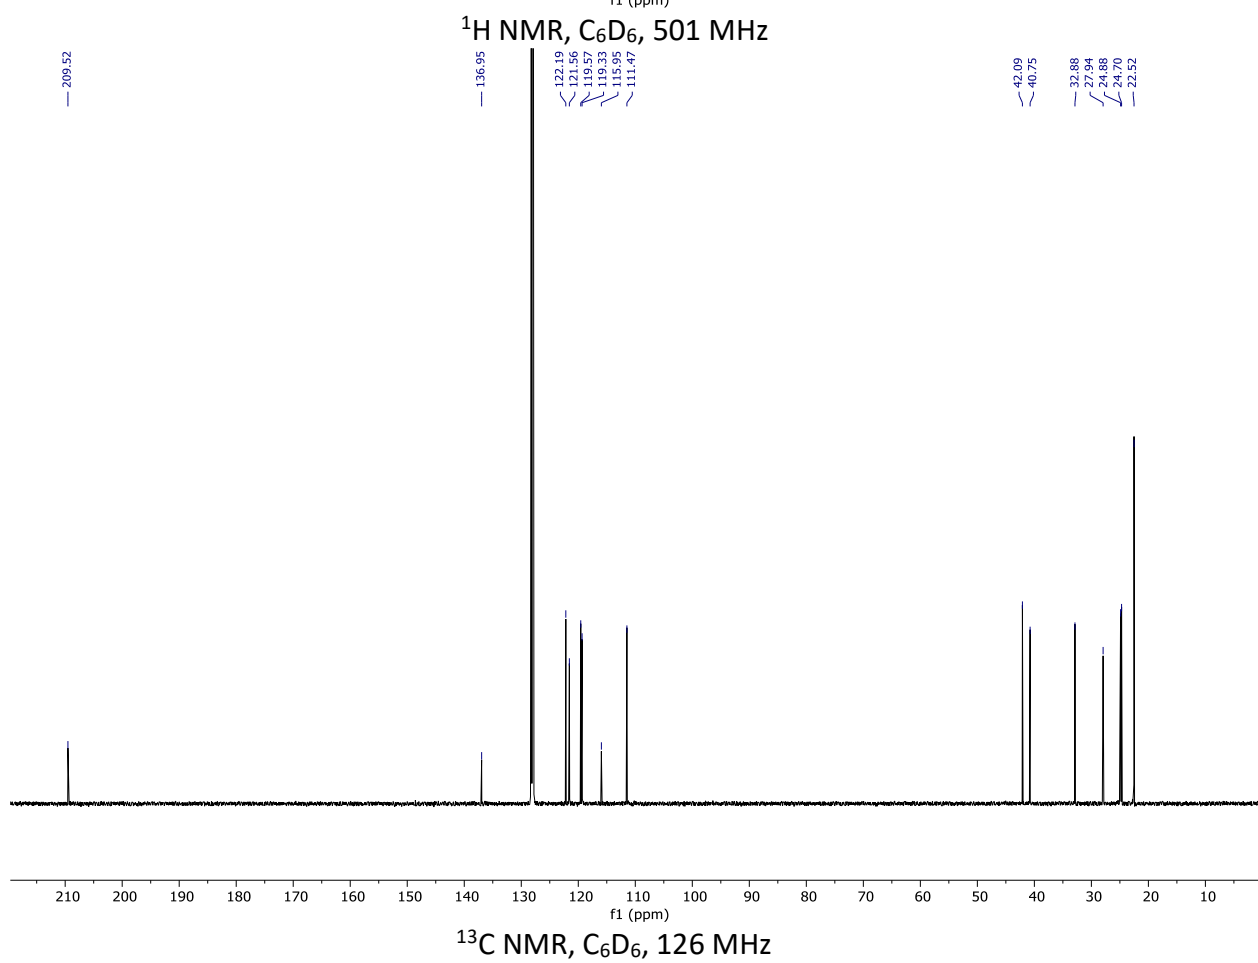

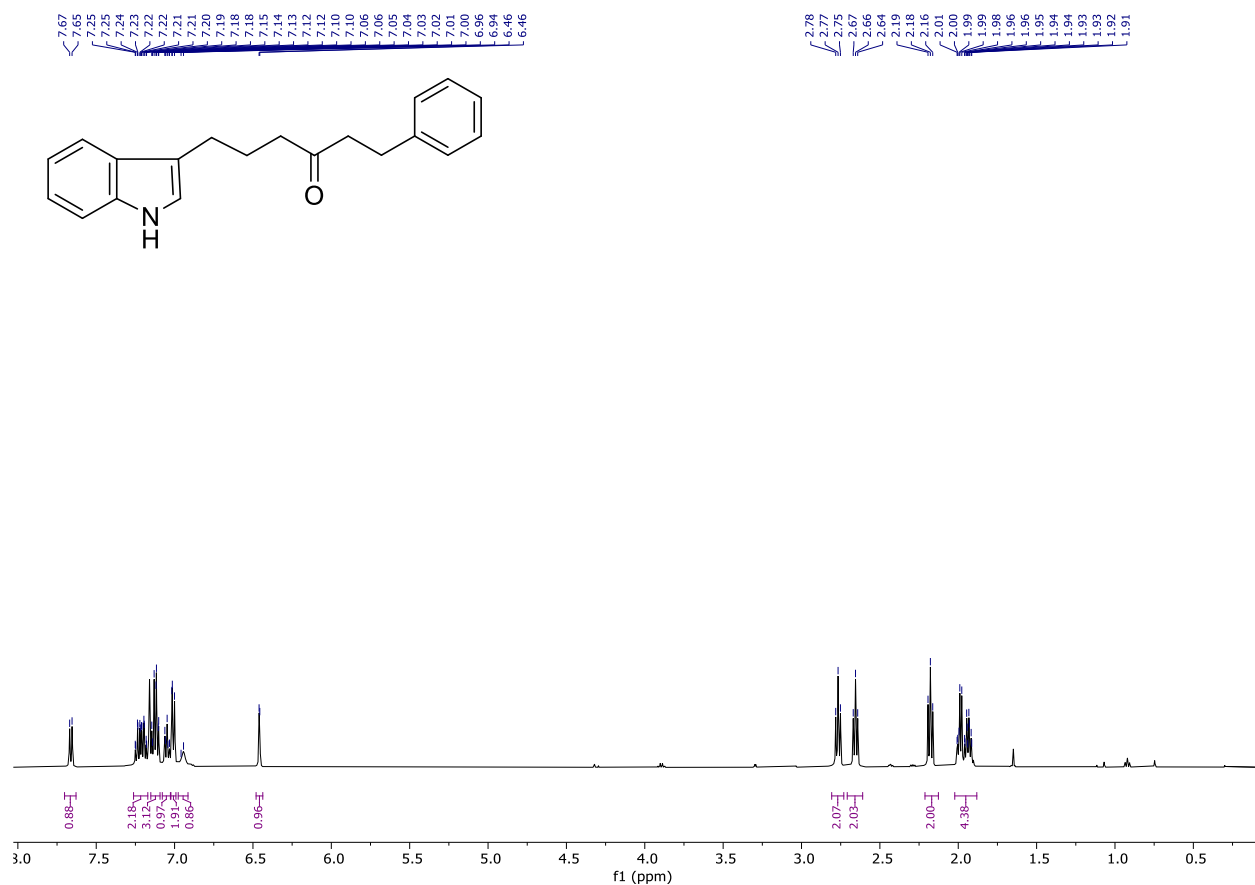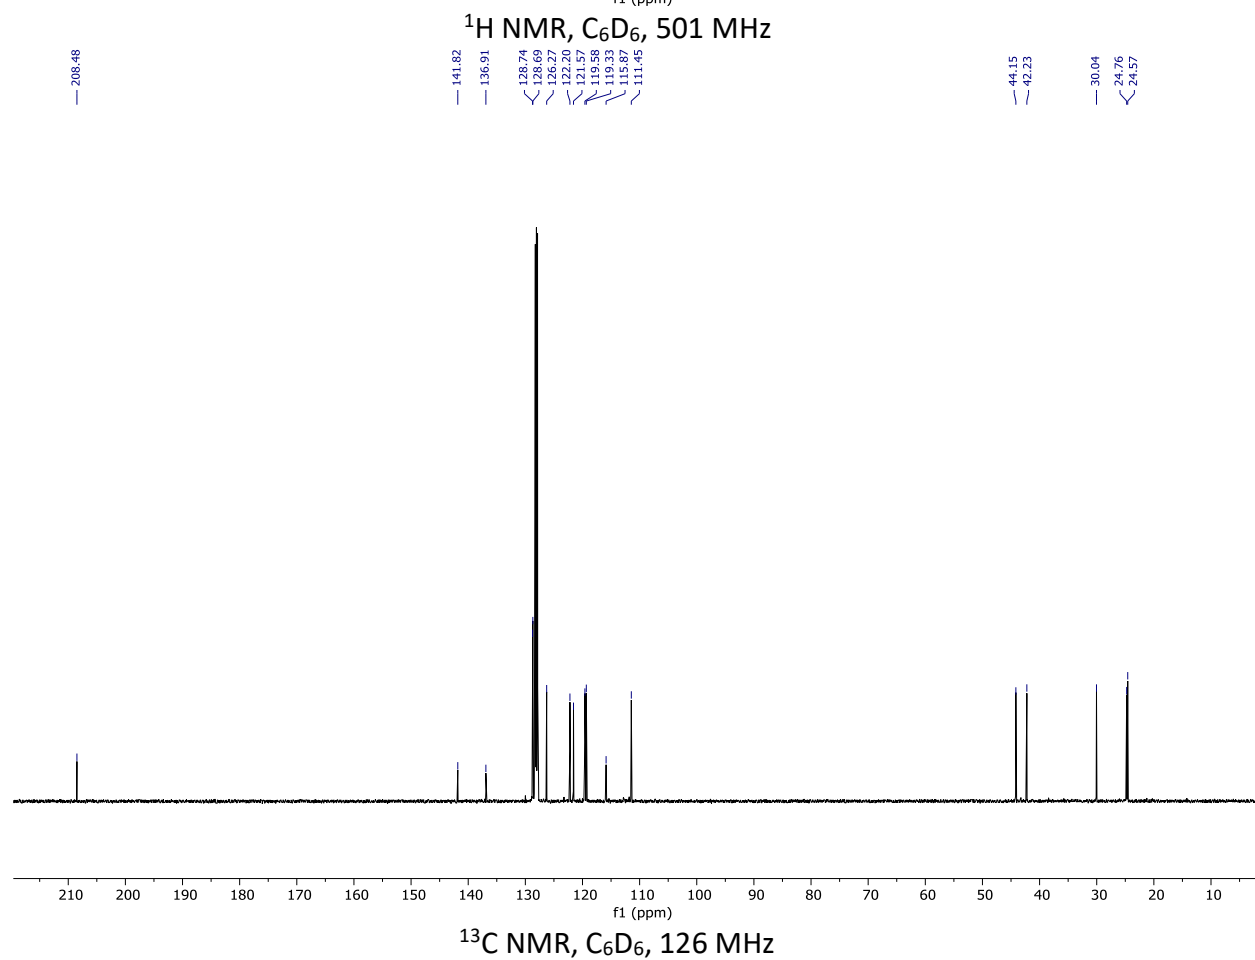

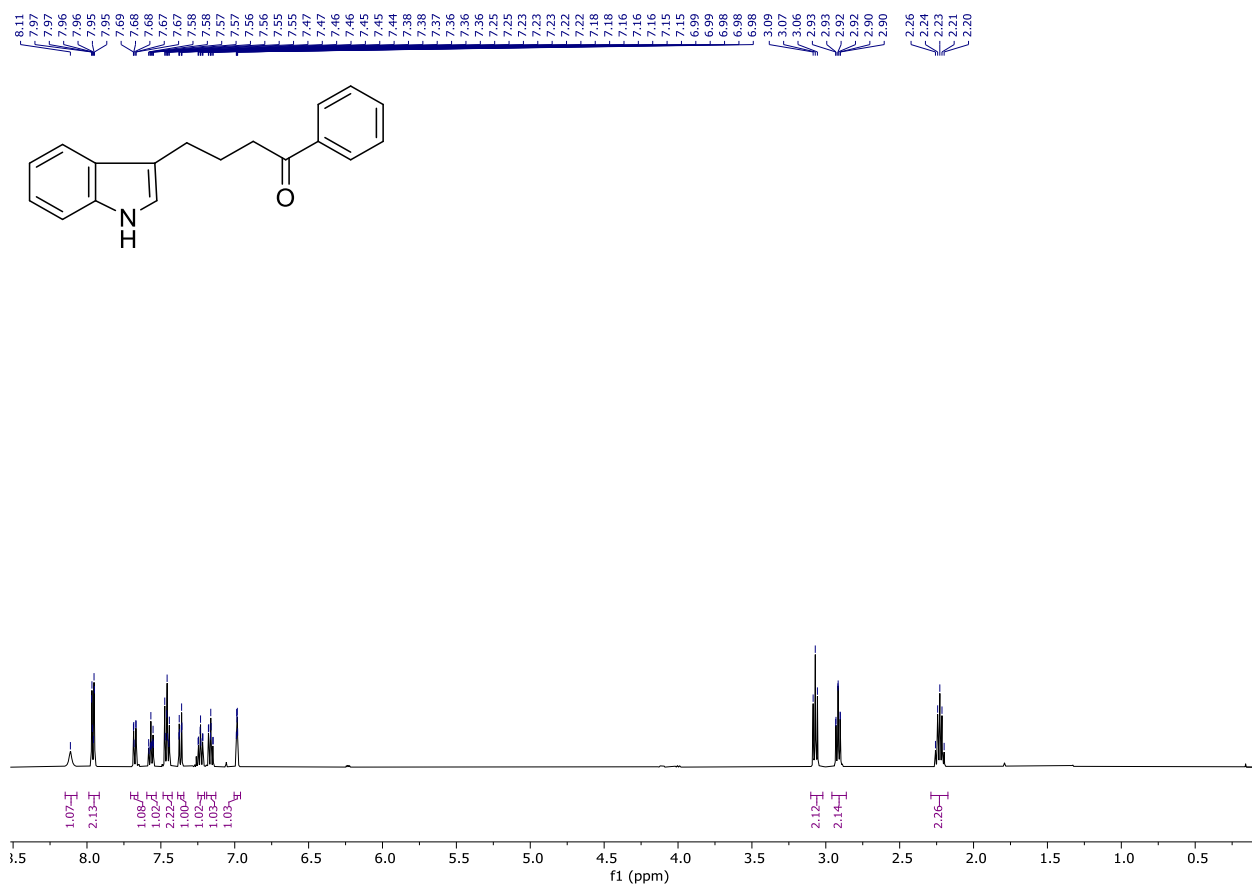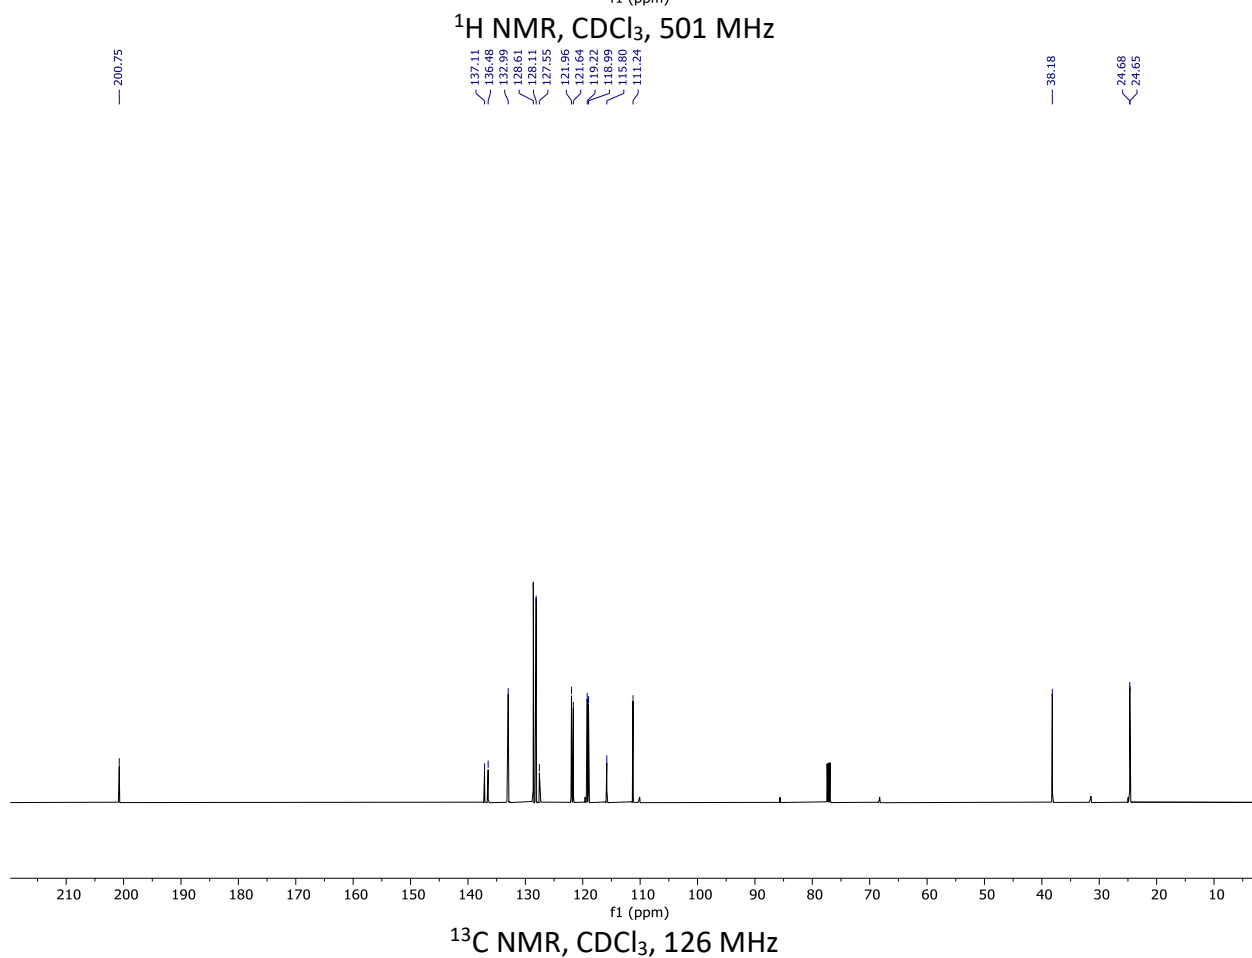

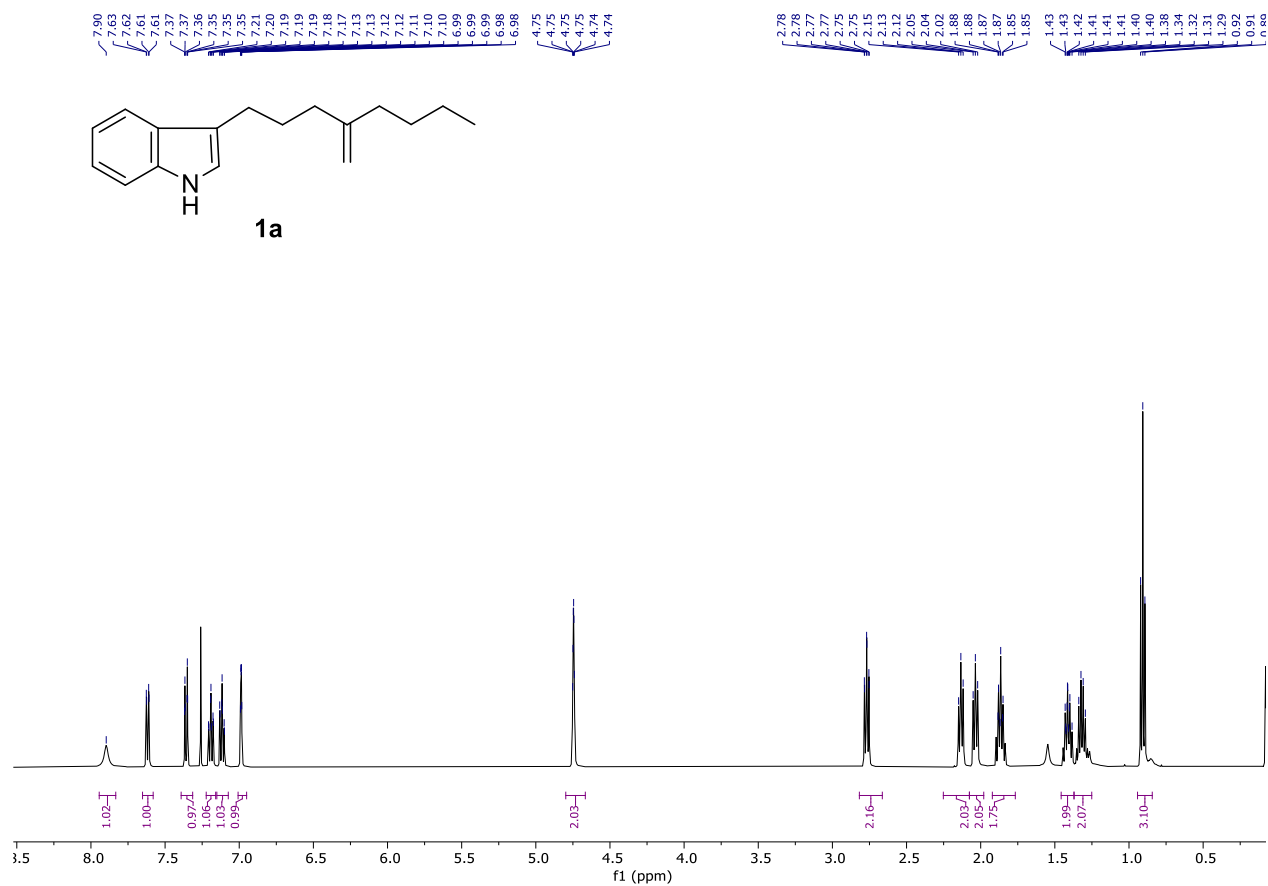

$^1\text{H}$  NMR, CDCl<sub>3</sub>, 501 MHz

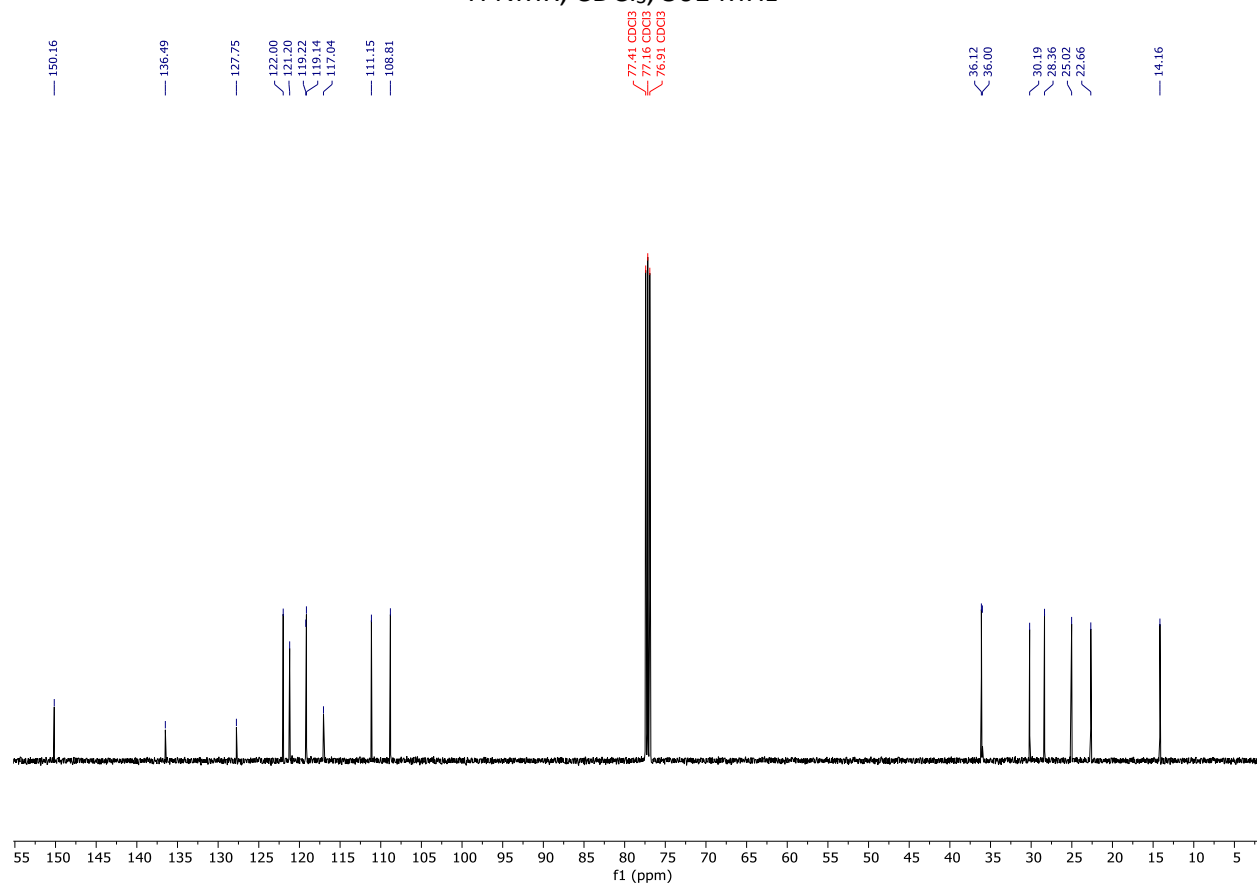

$^{13}\text{C}$  NMR, CDCl<sub>3</sub>, 126 MHz

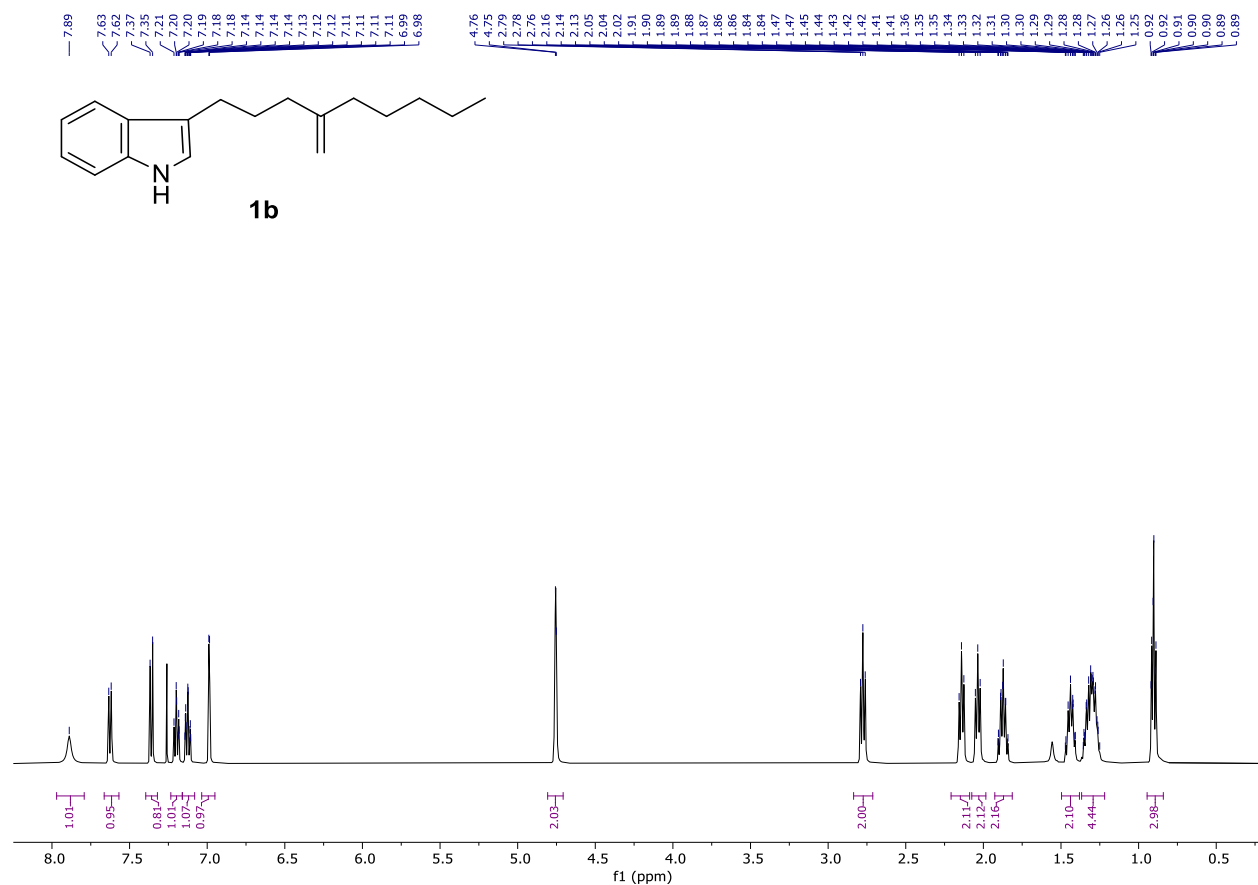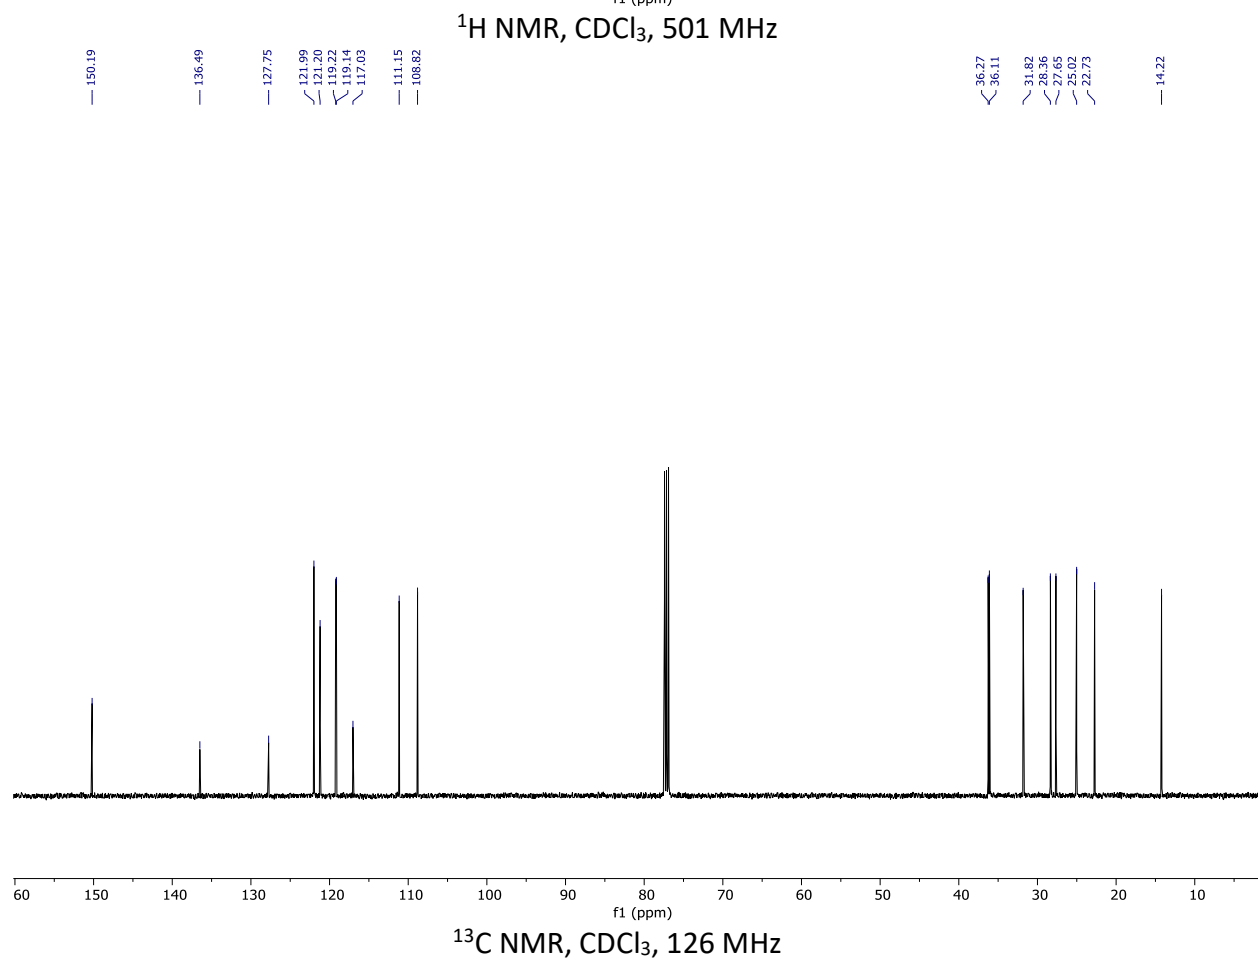

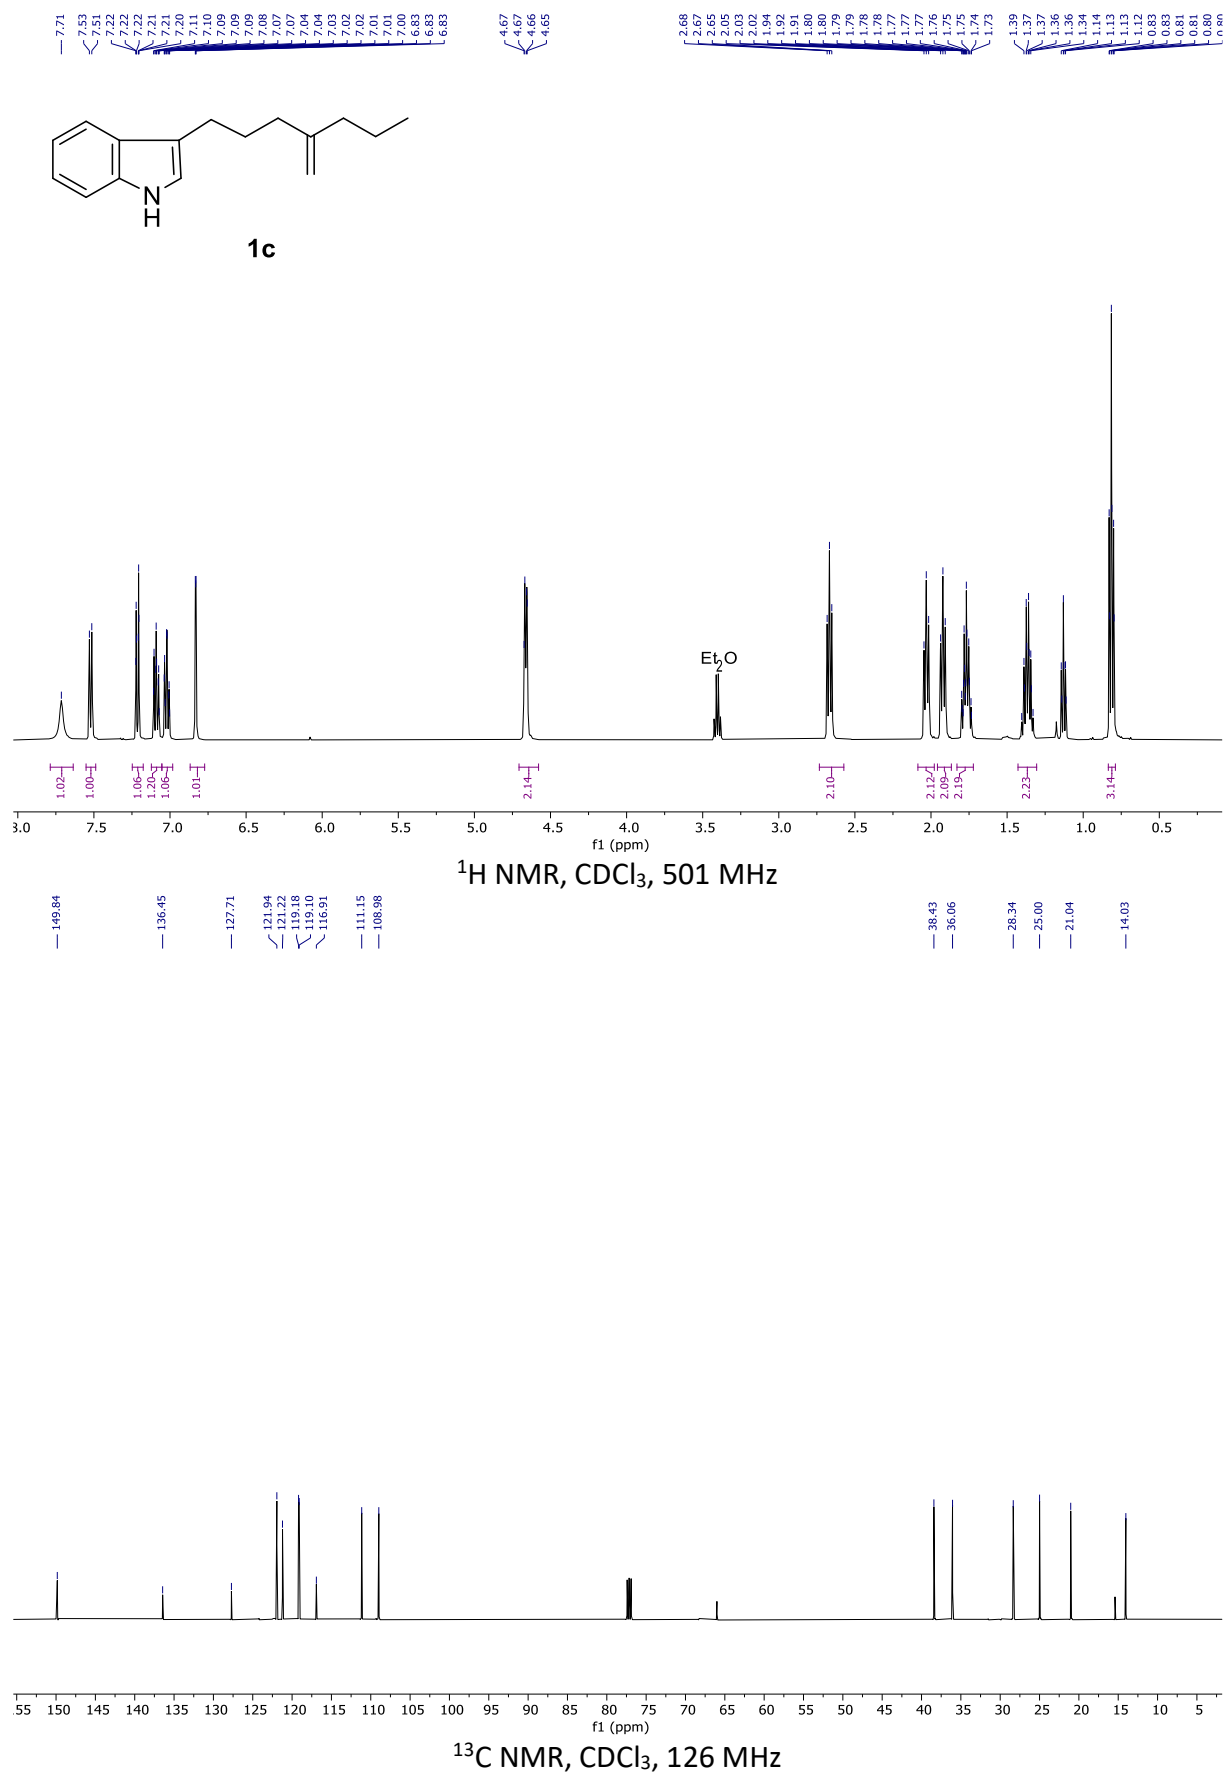

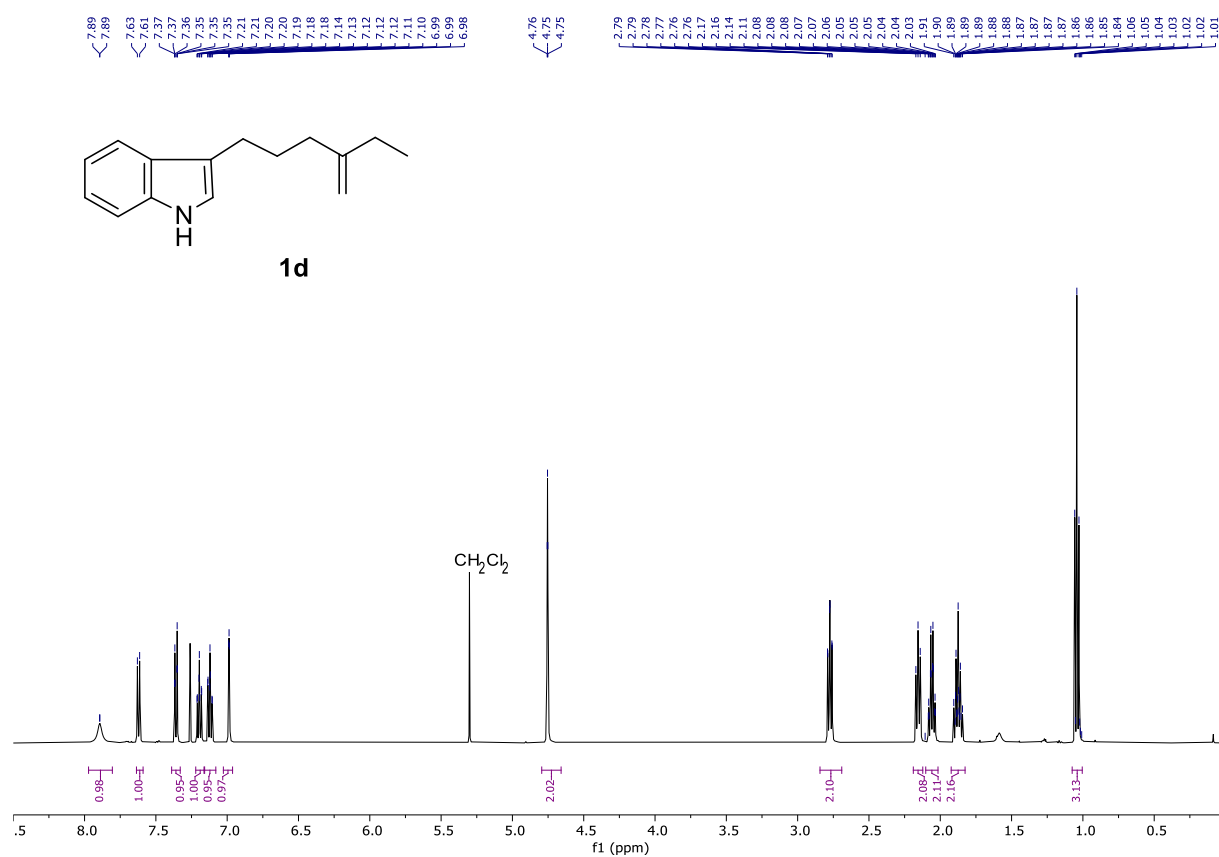

$^1\text{H}$  NMR, CDCl<sub>3</sub>, 501 MHz

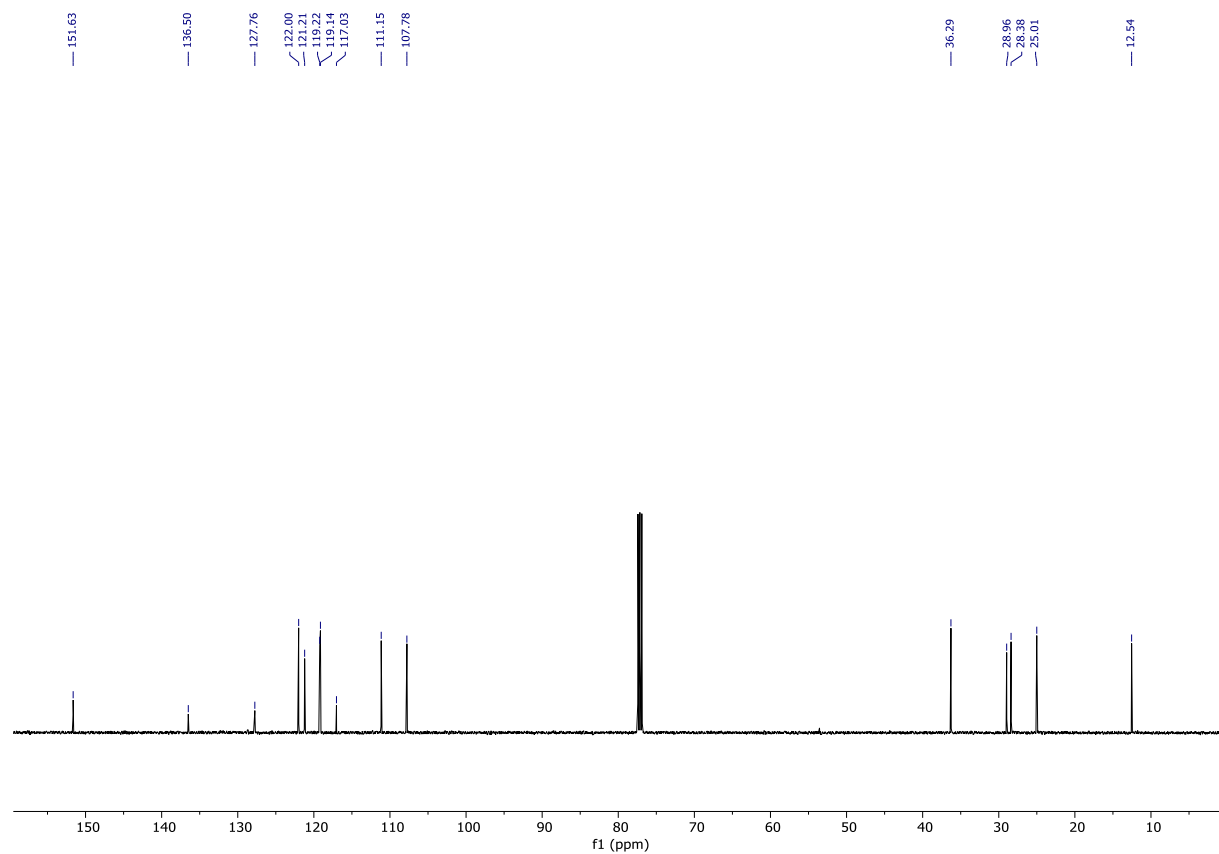

$^{13}\text{C}$  NMR, CDCl<sub>3</sub>, 126 MHz

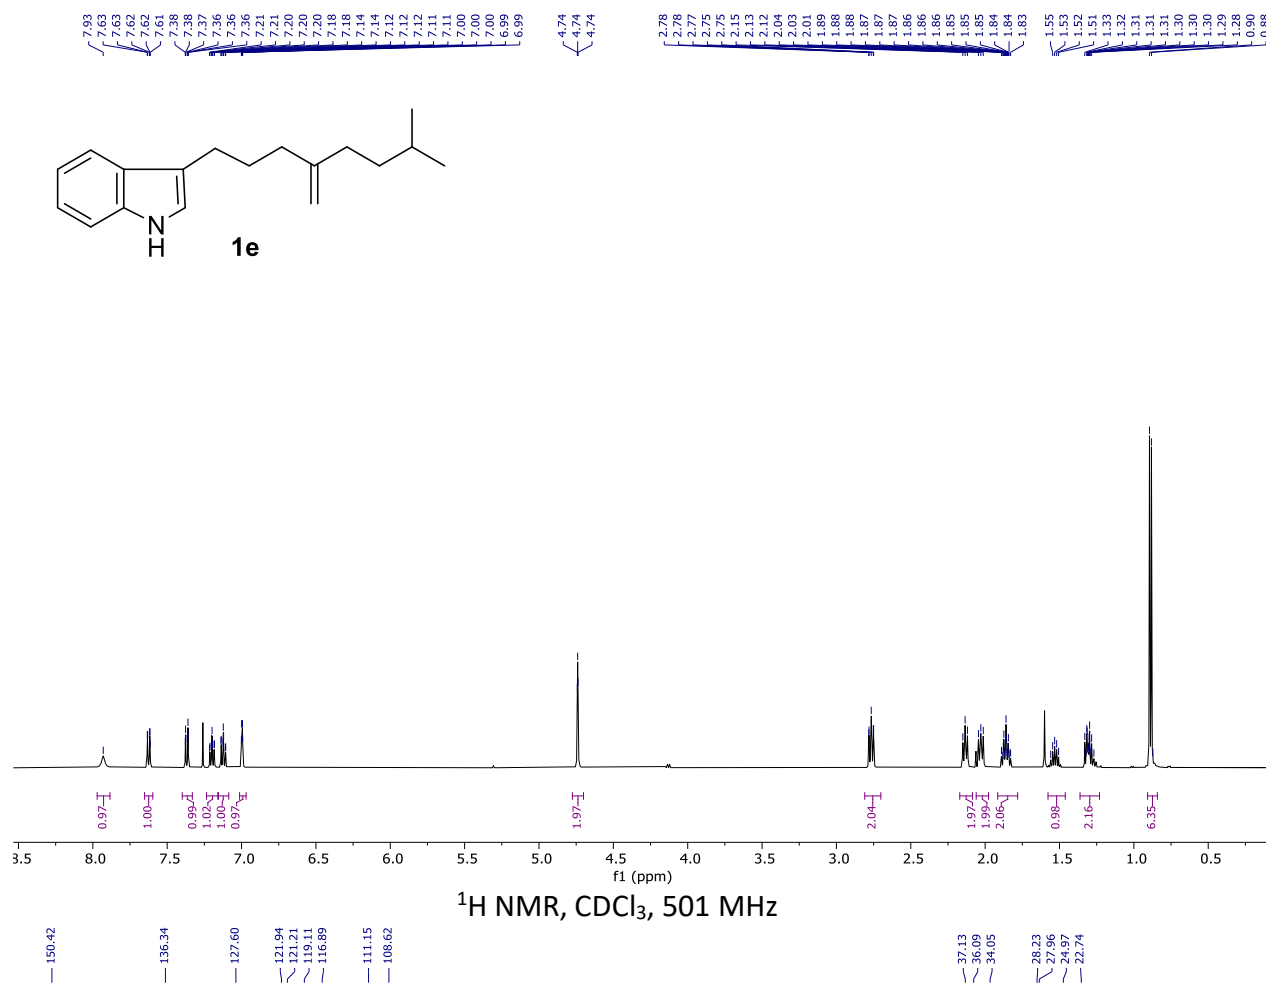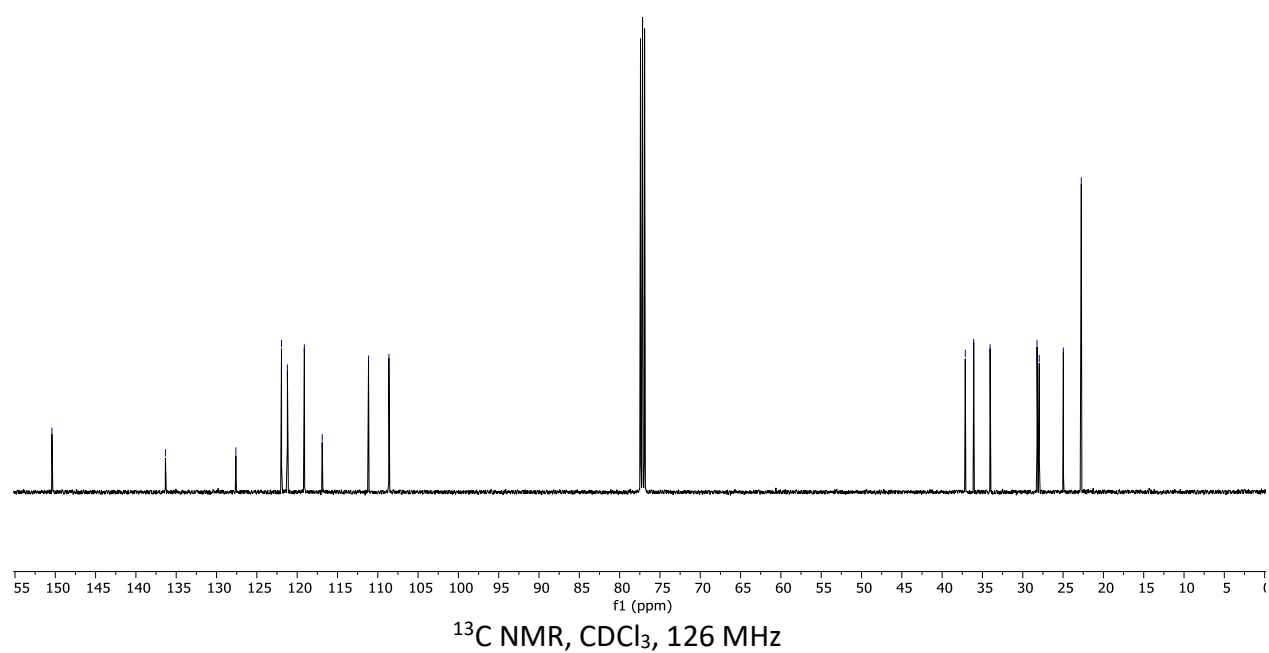

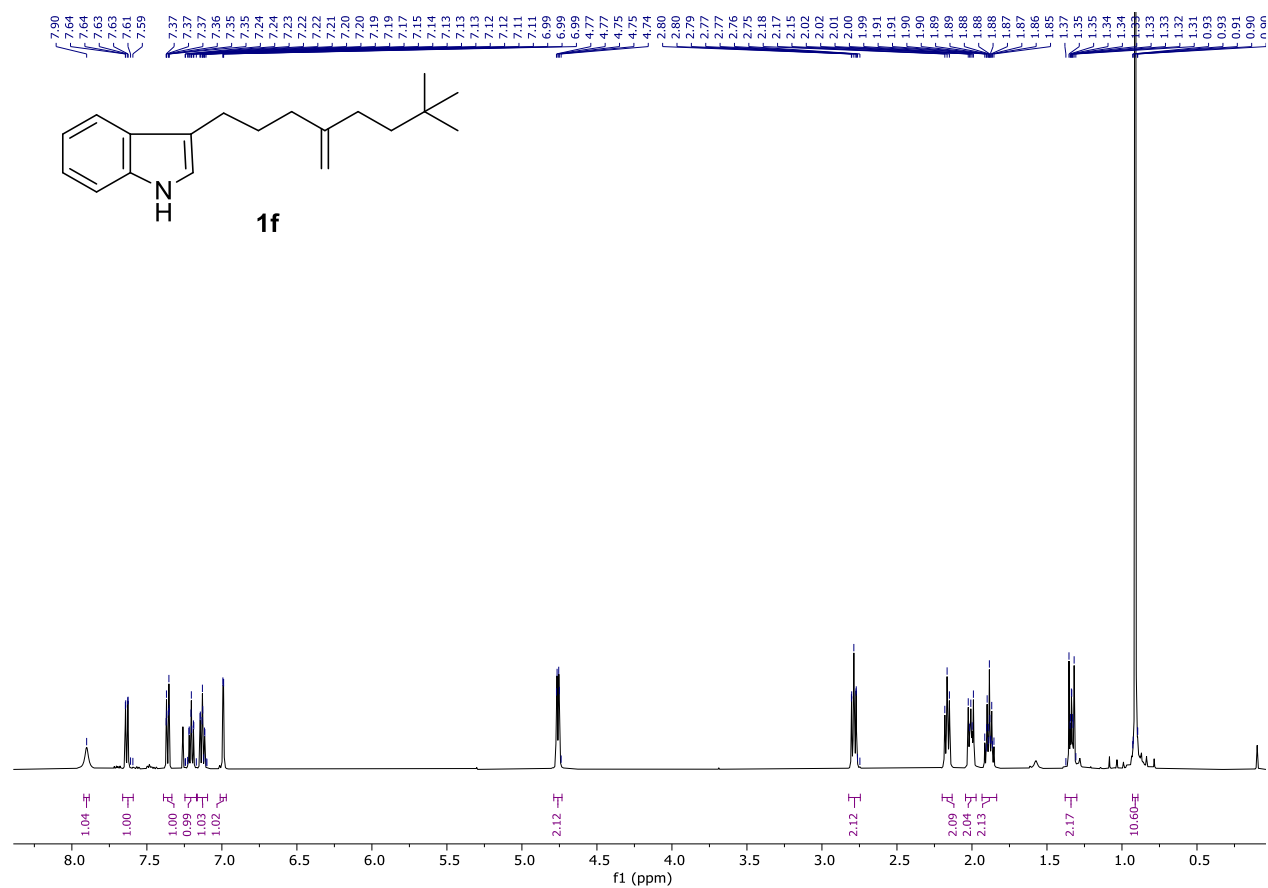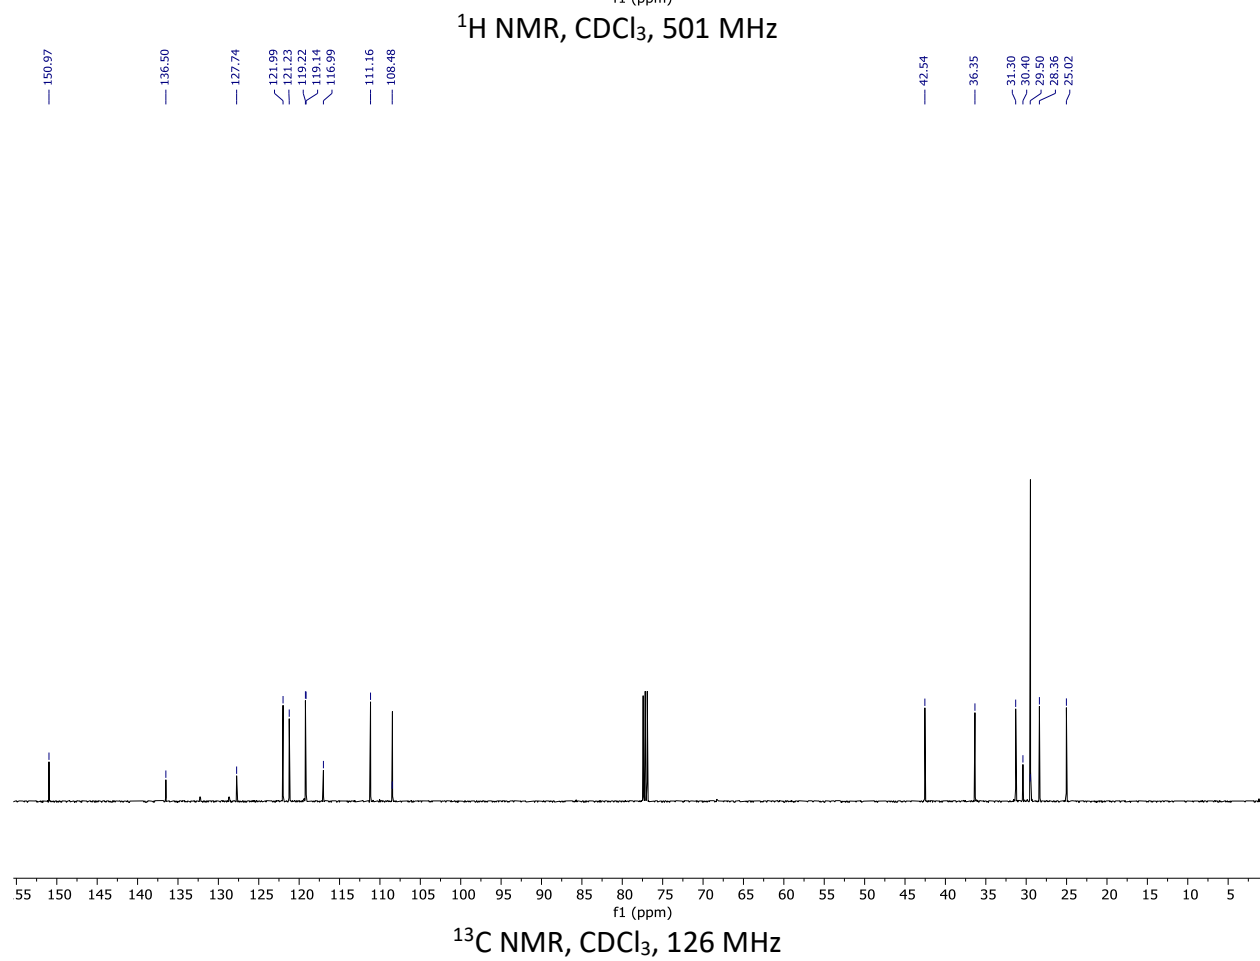

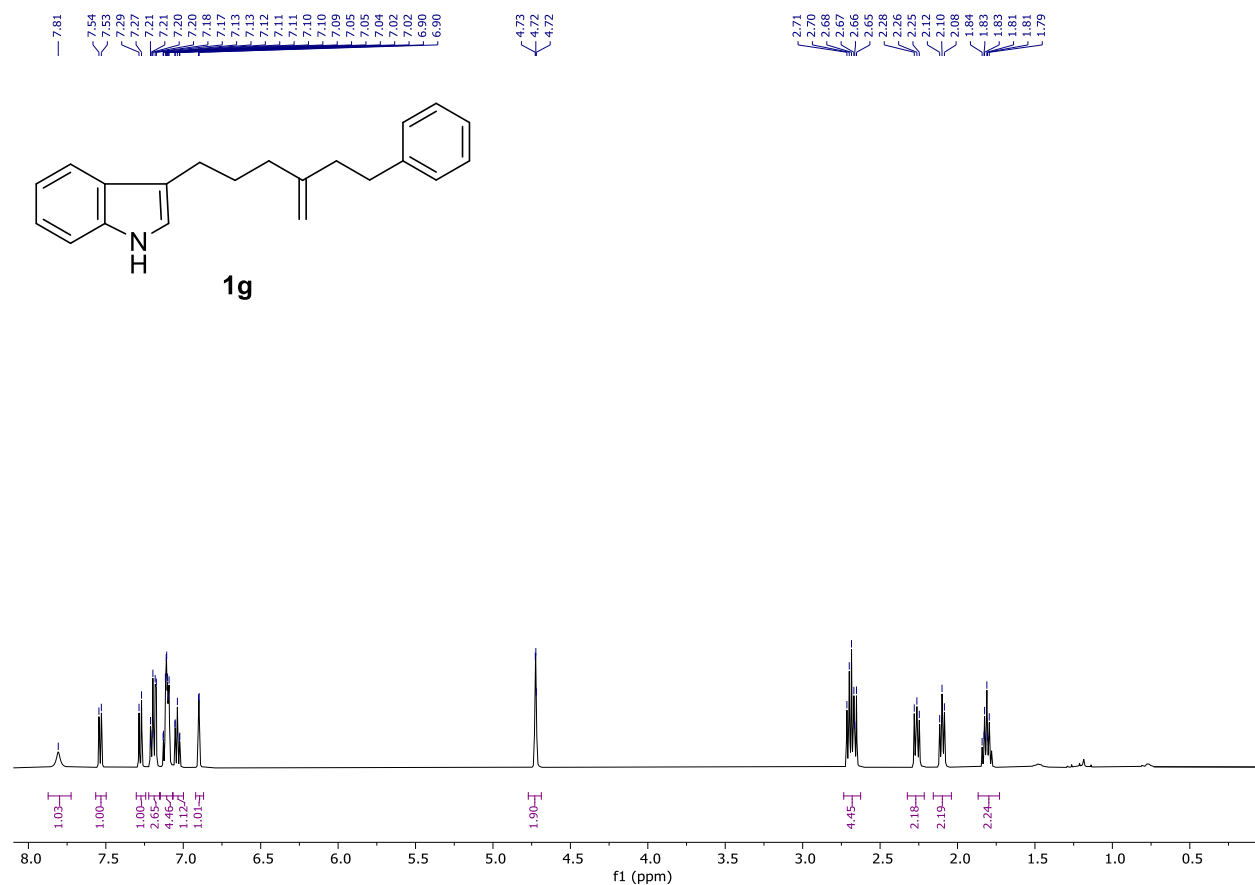

$^1\text{H}$  NMR, CDCl<sub>3</sub>, 501 MHz

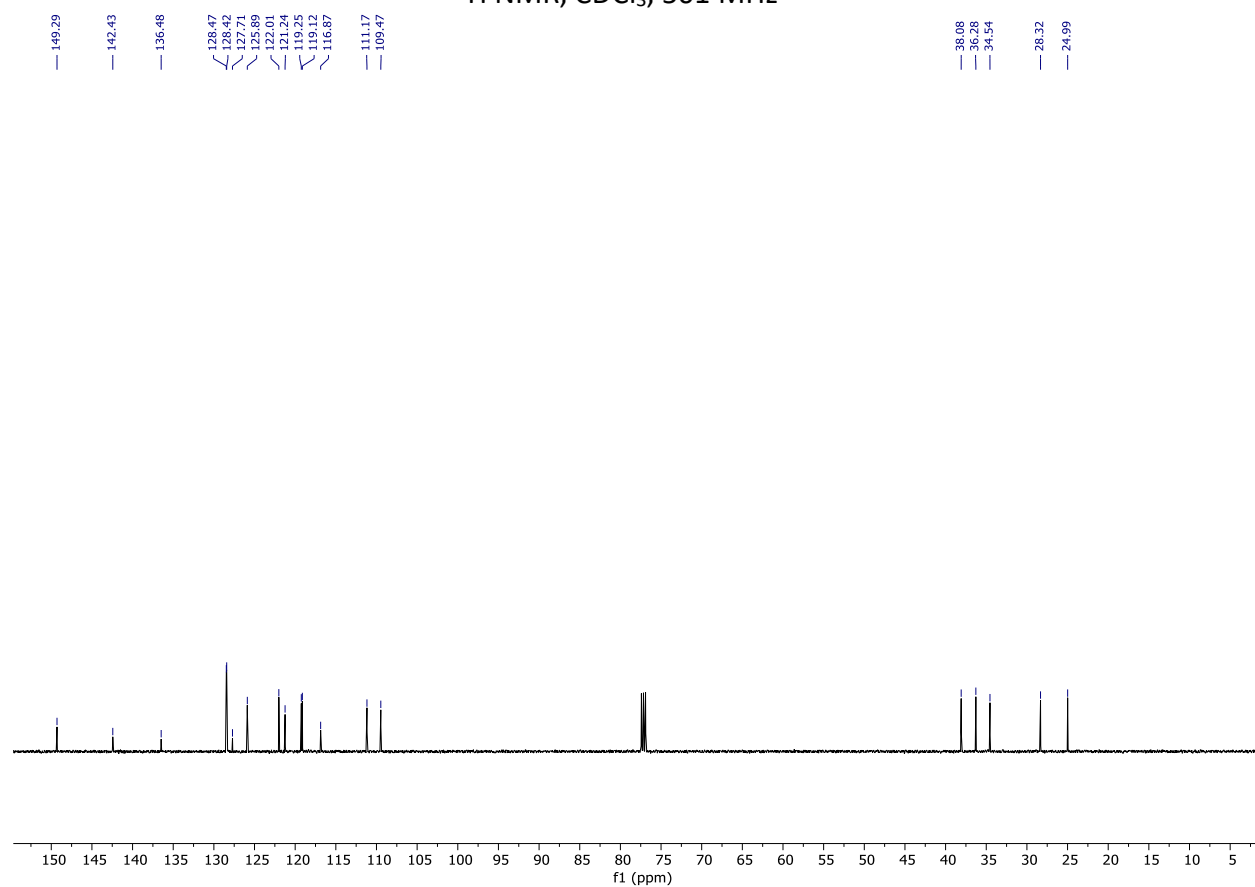

$^{13}\text{C}$  NMR, CDCl<sub>3</sub>, 126 MHz

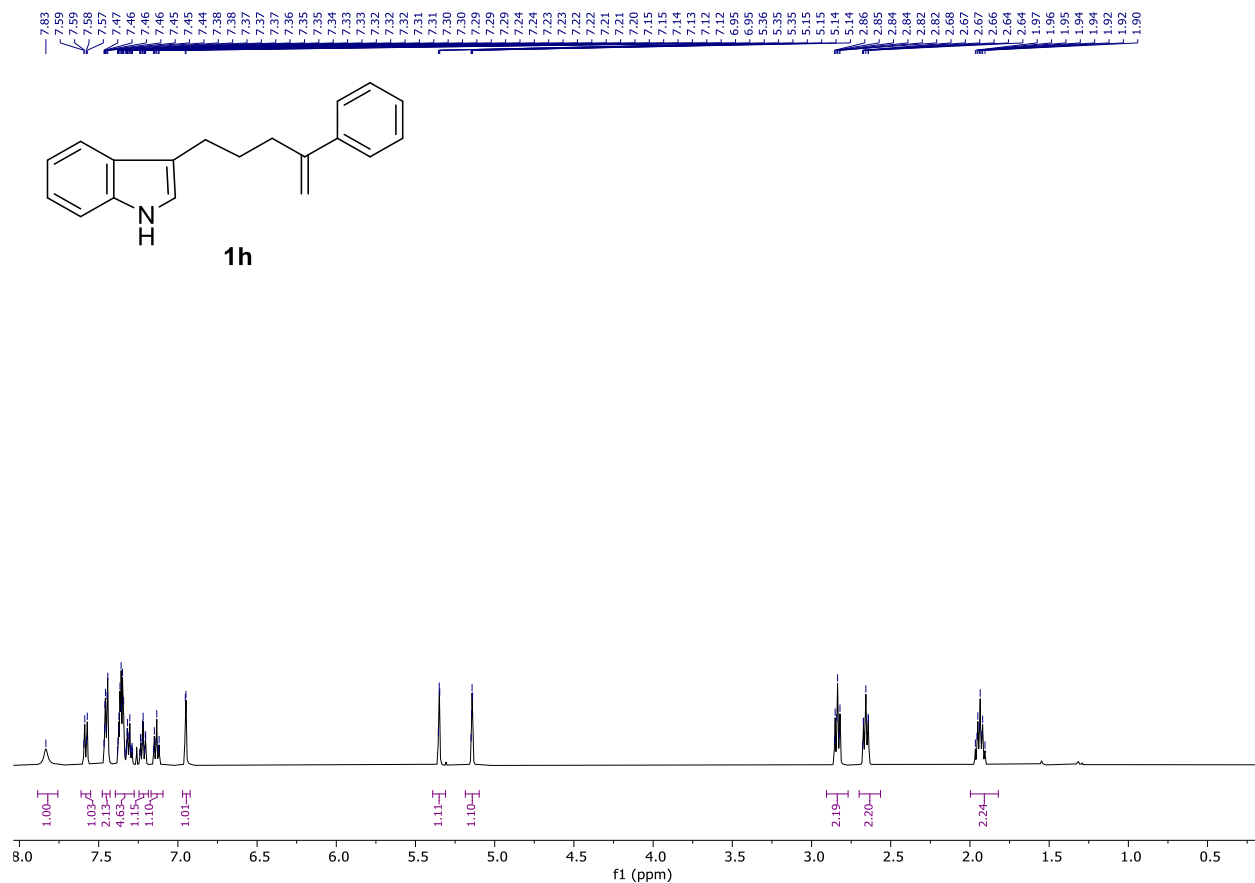

$^1\text{H}$  NMR, CDCl<sub>3</sub>, 501 MHz

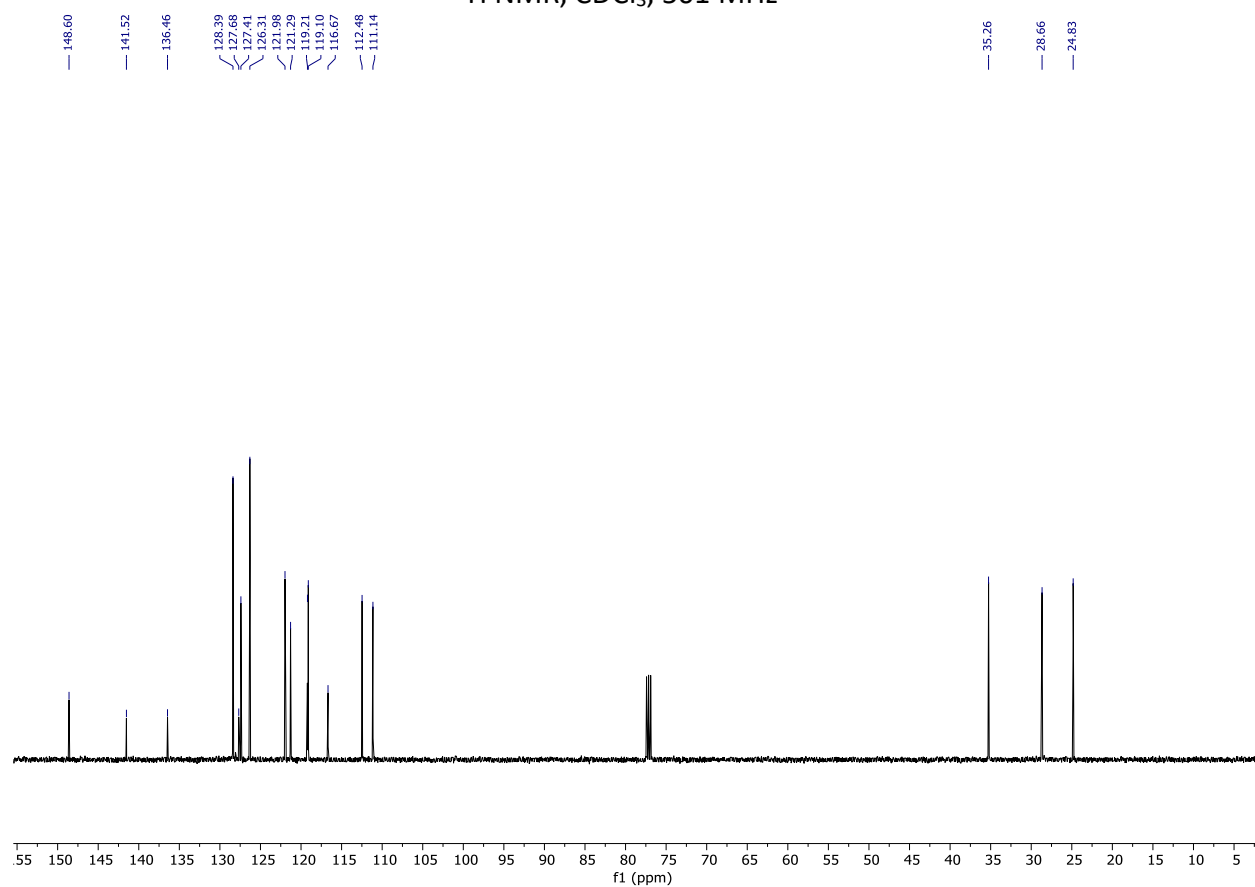

$^{13}\text{C}$  NMR, CDCl<sub>3</sub>, 126 MHz

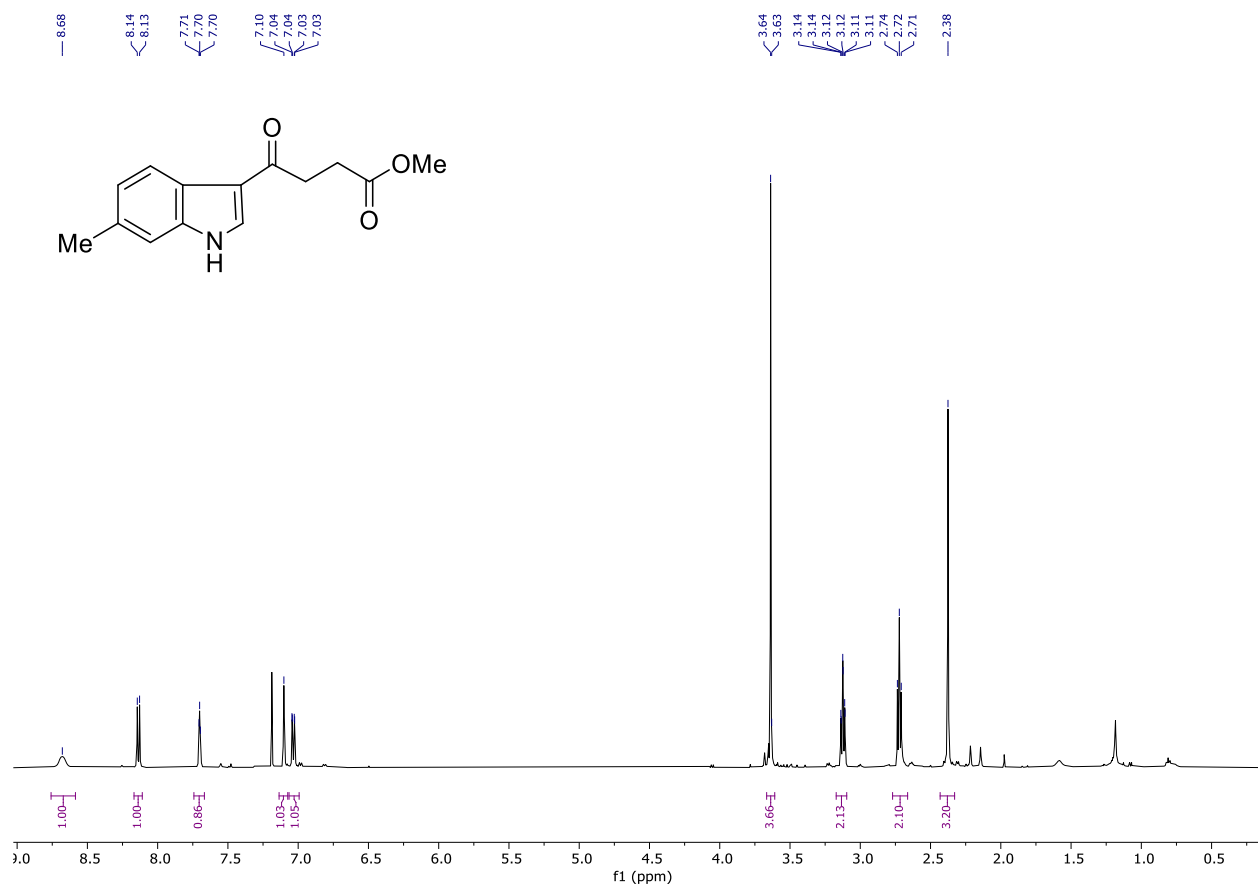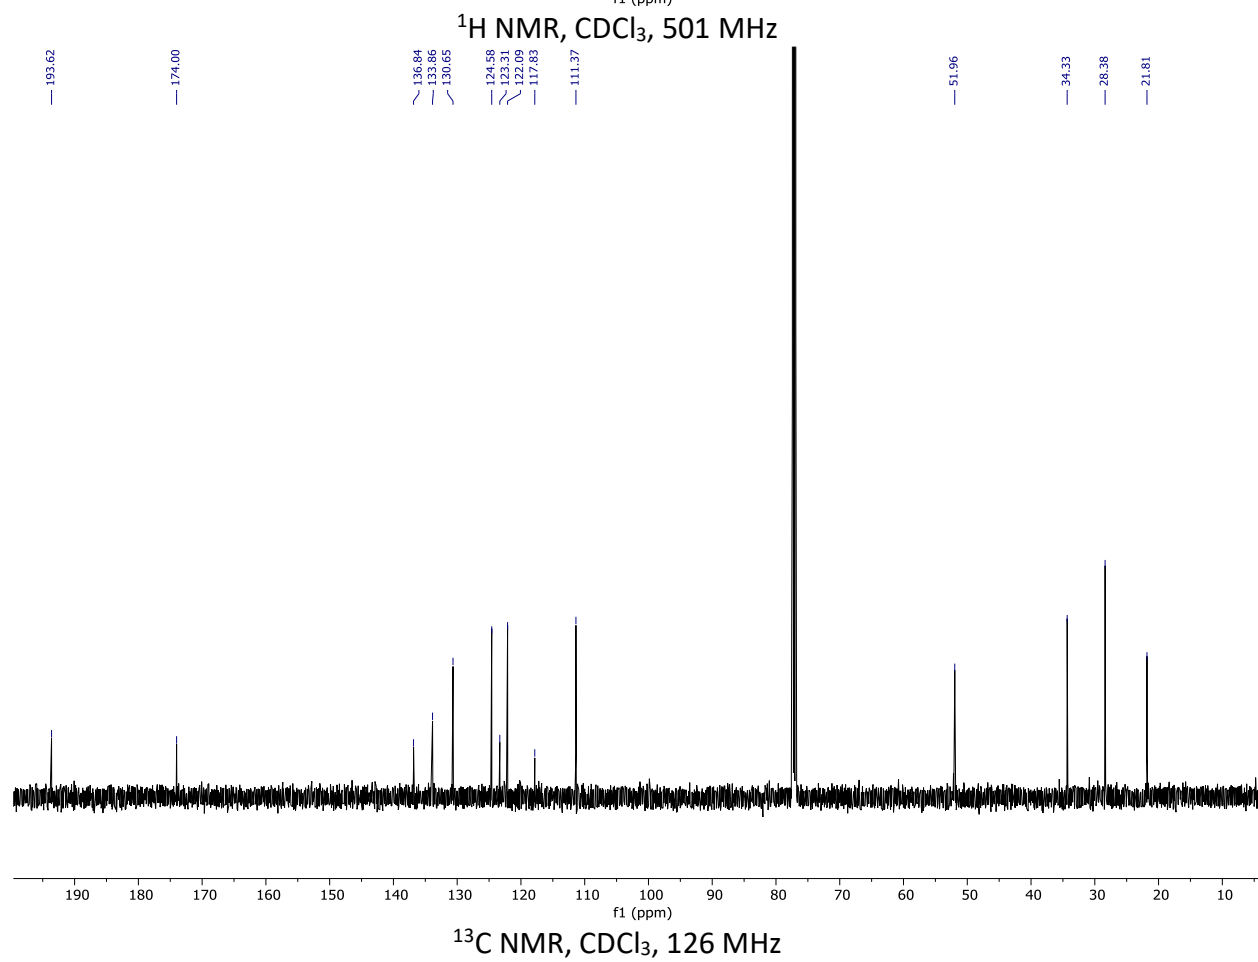

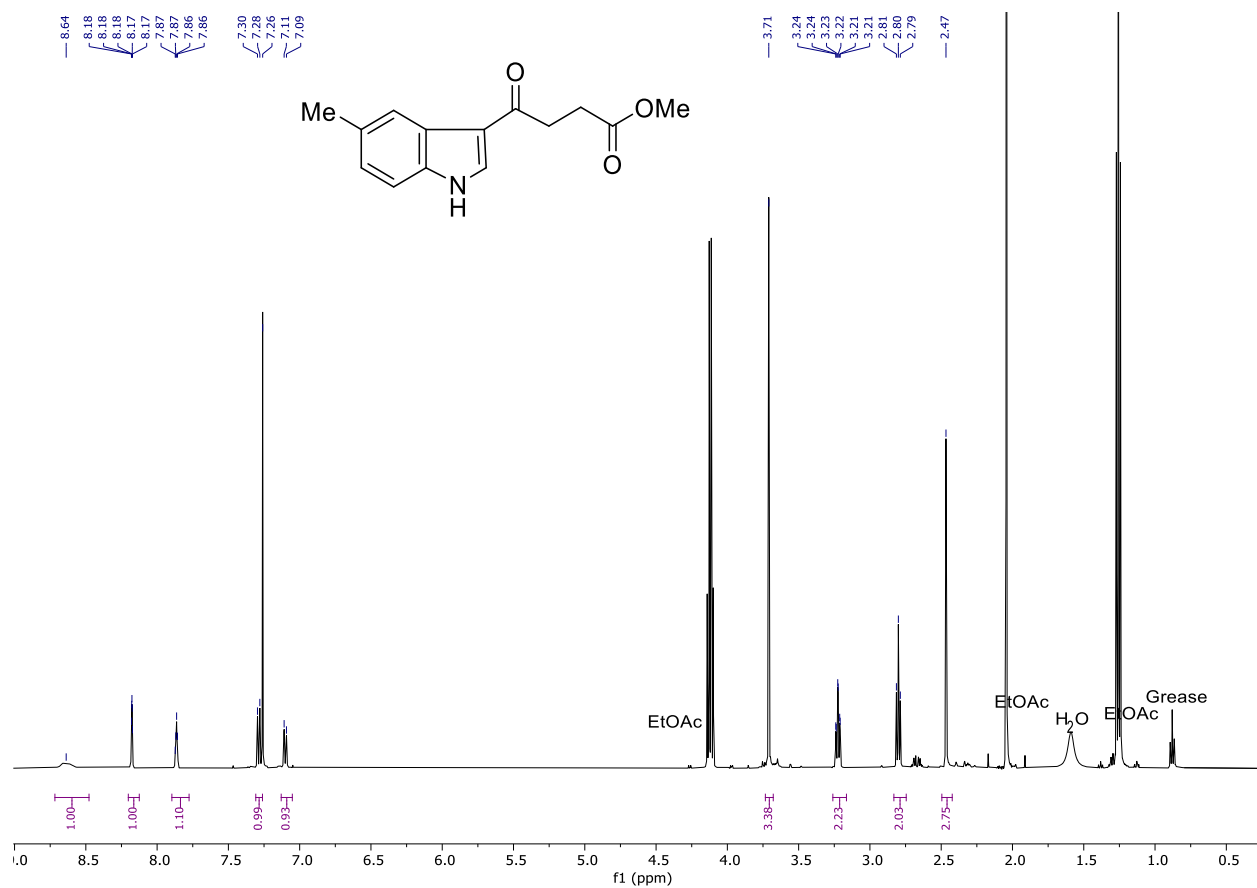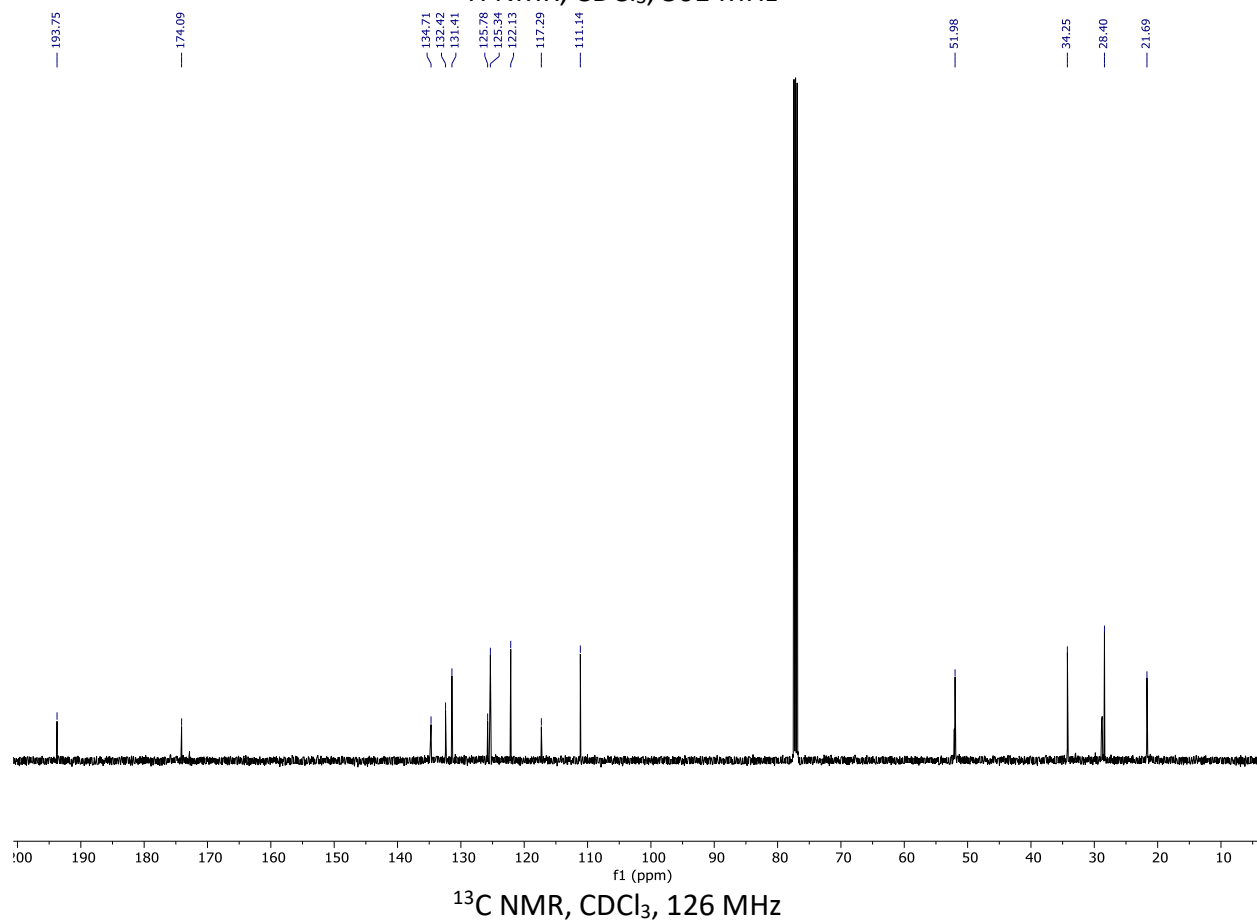

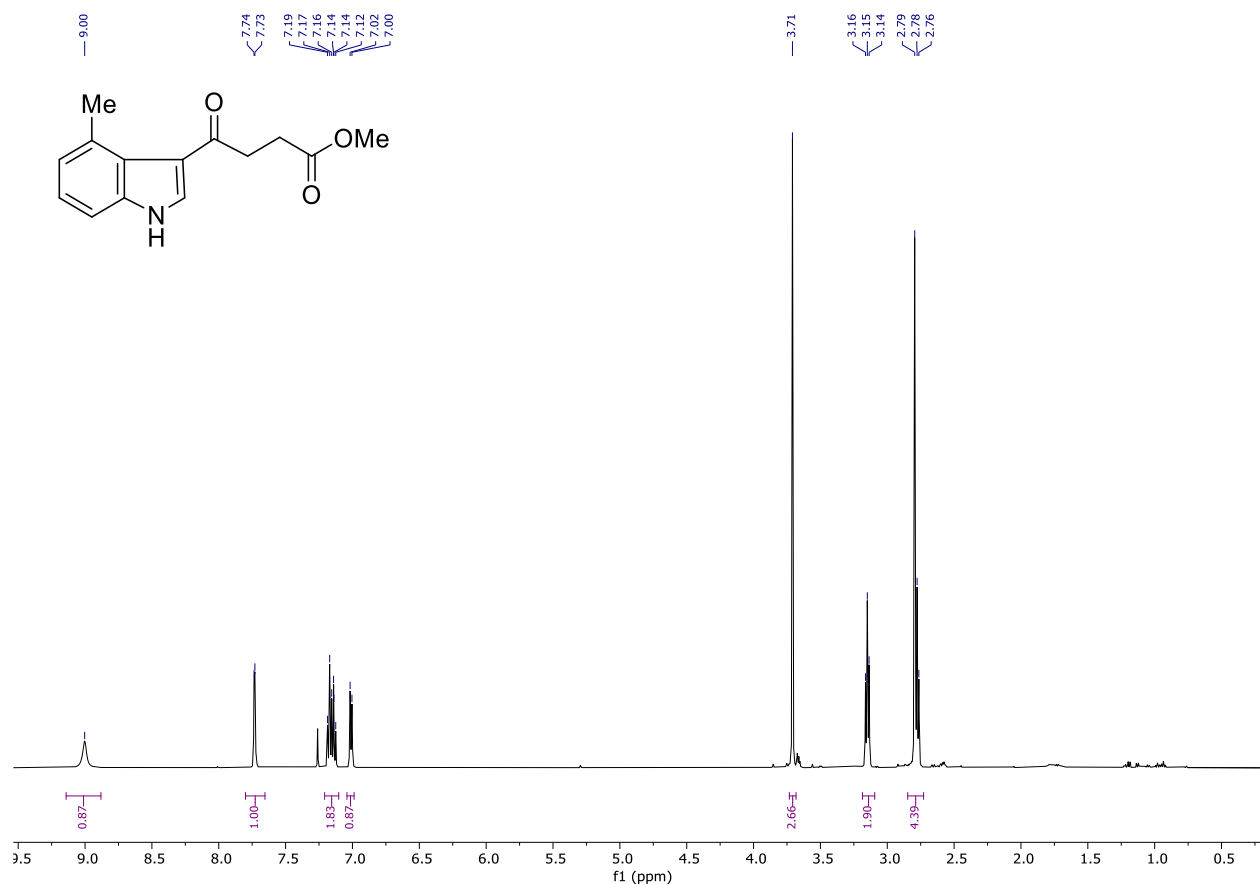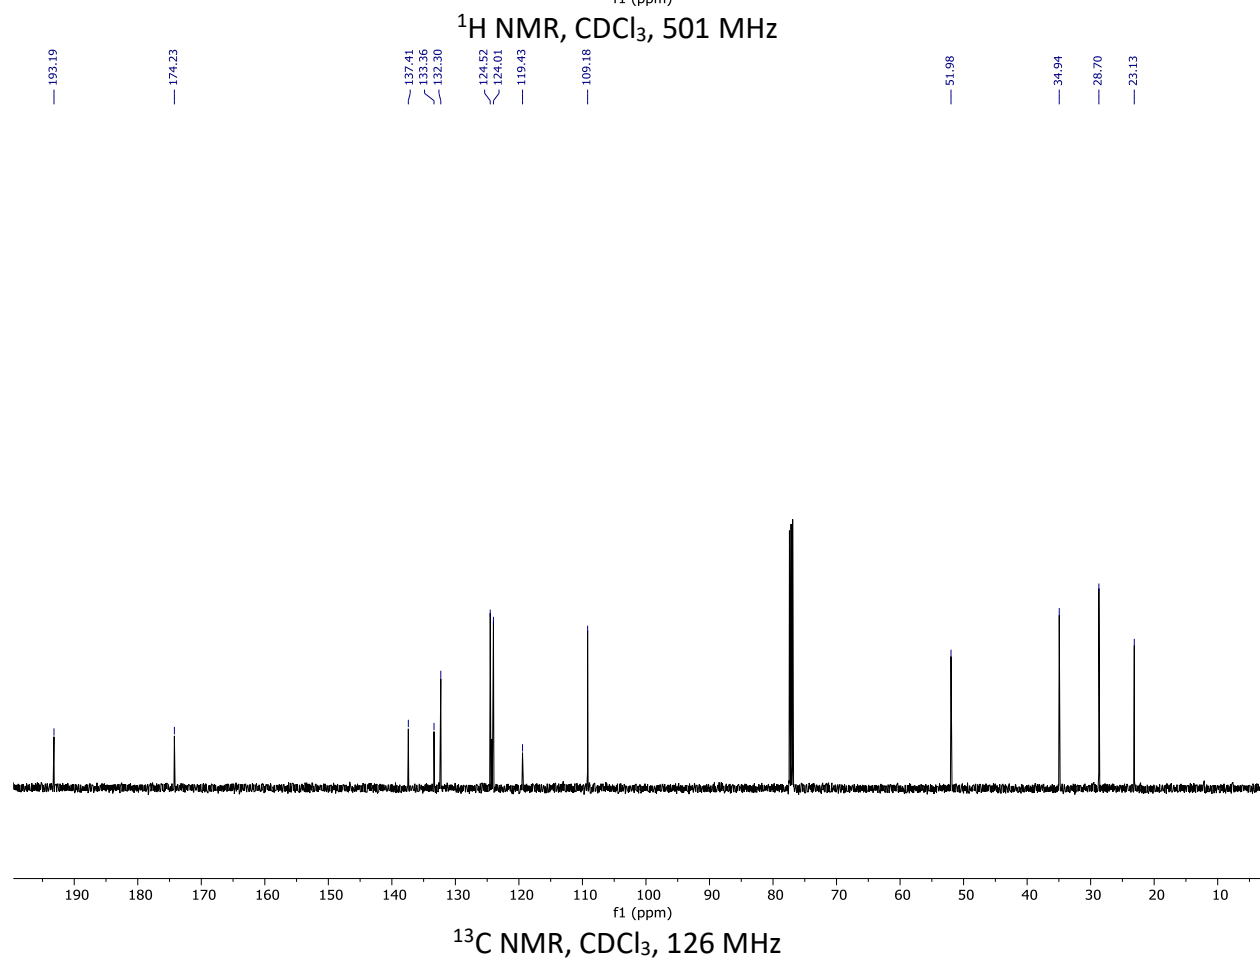

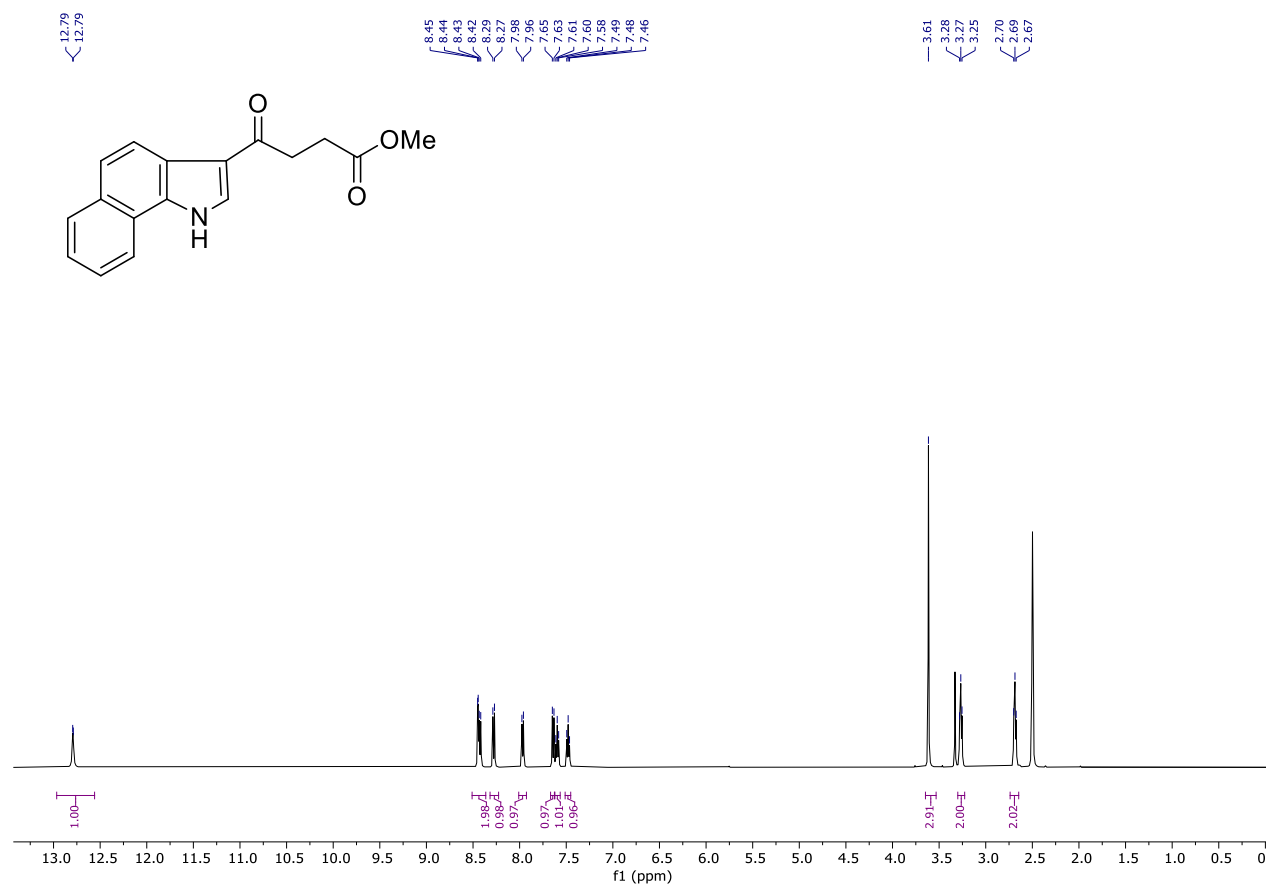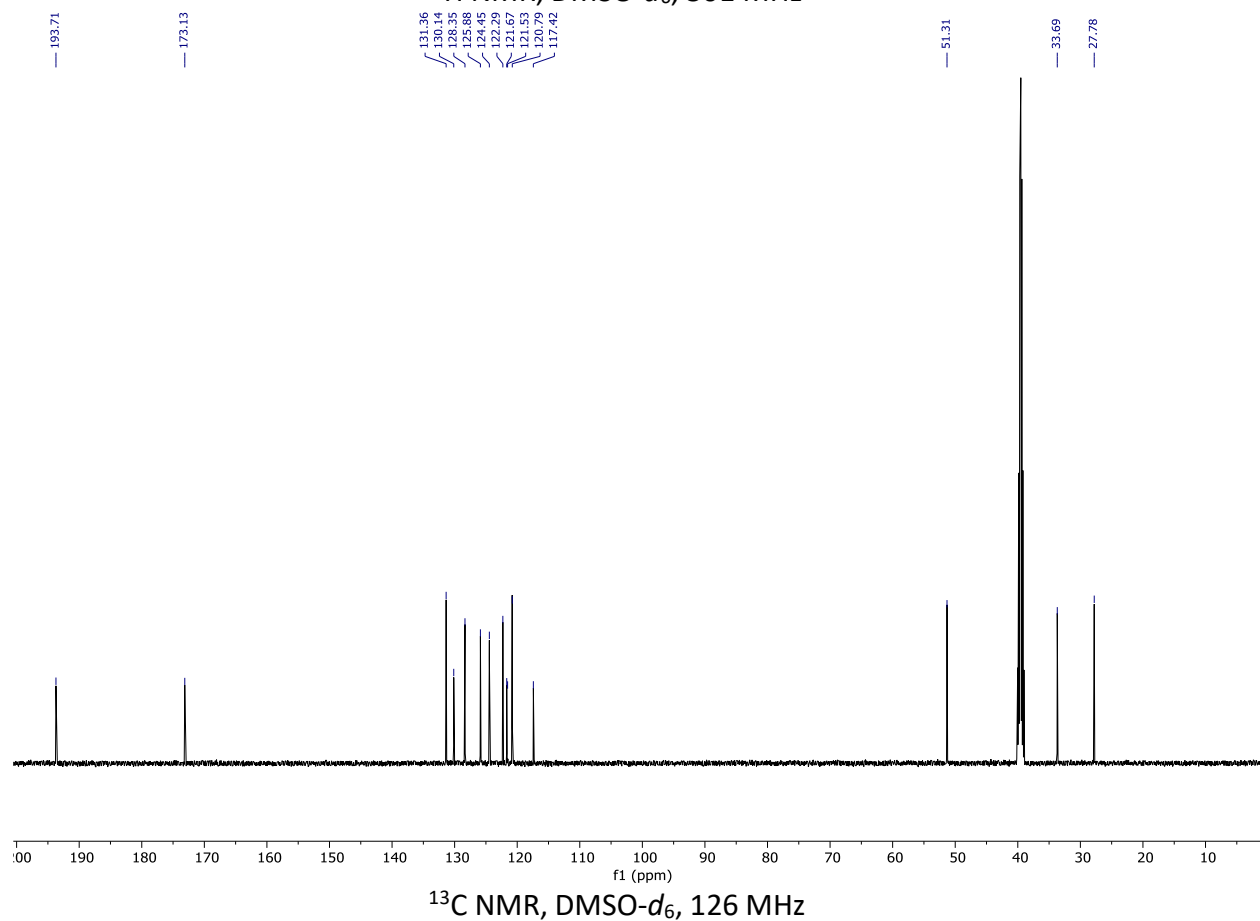

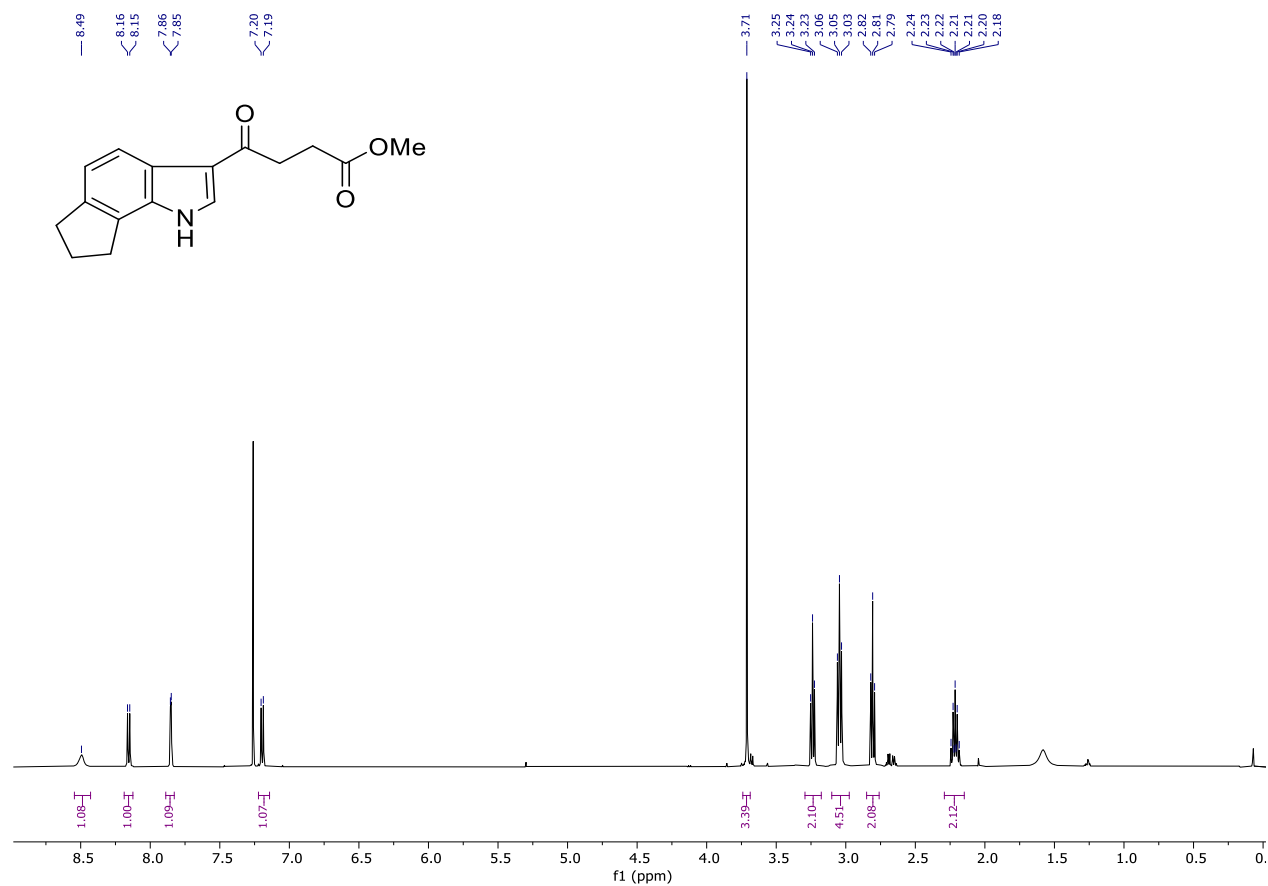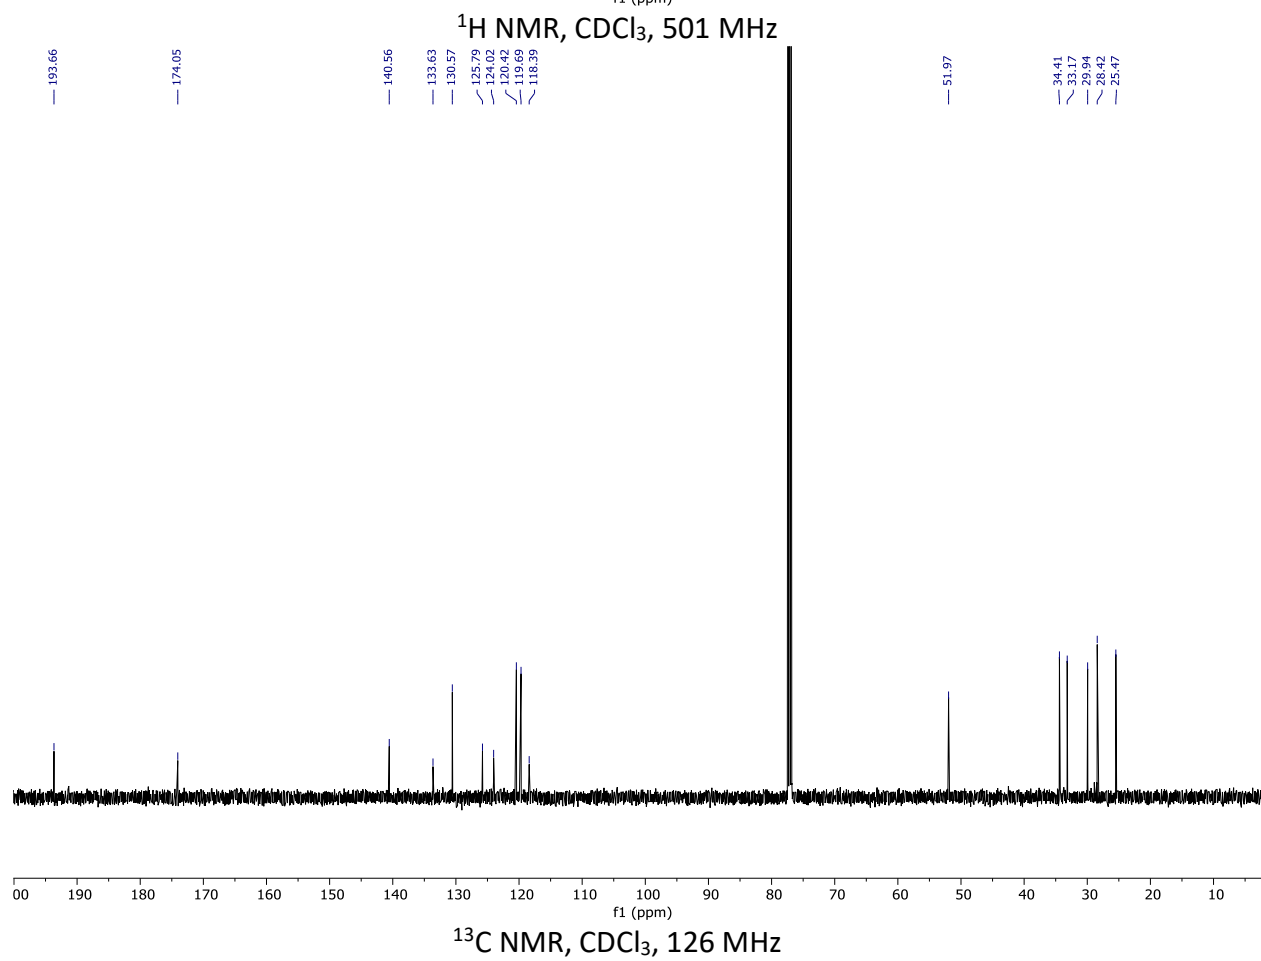

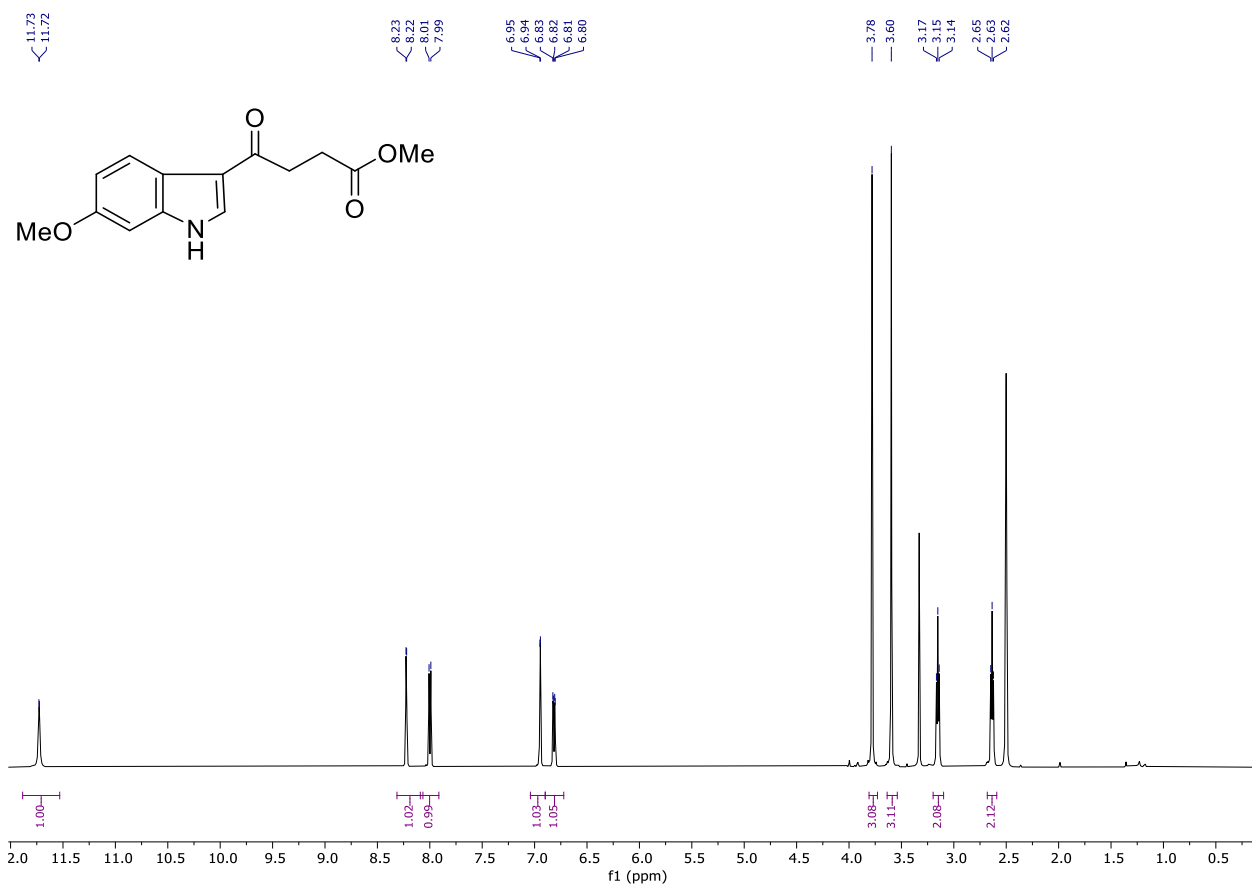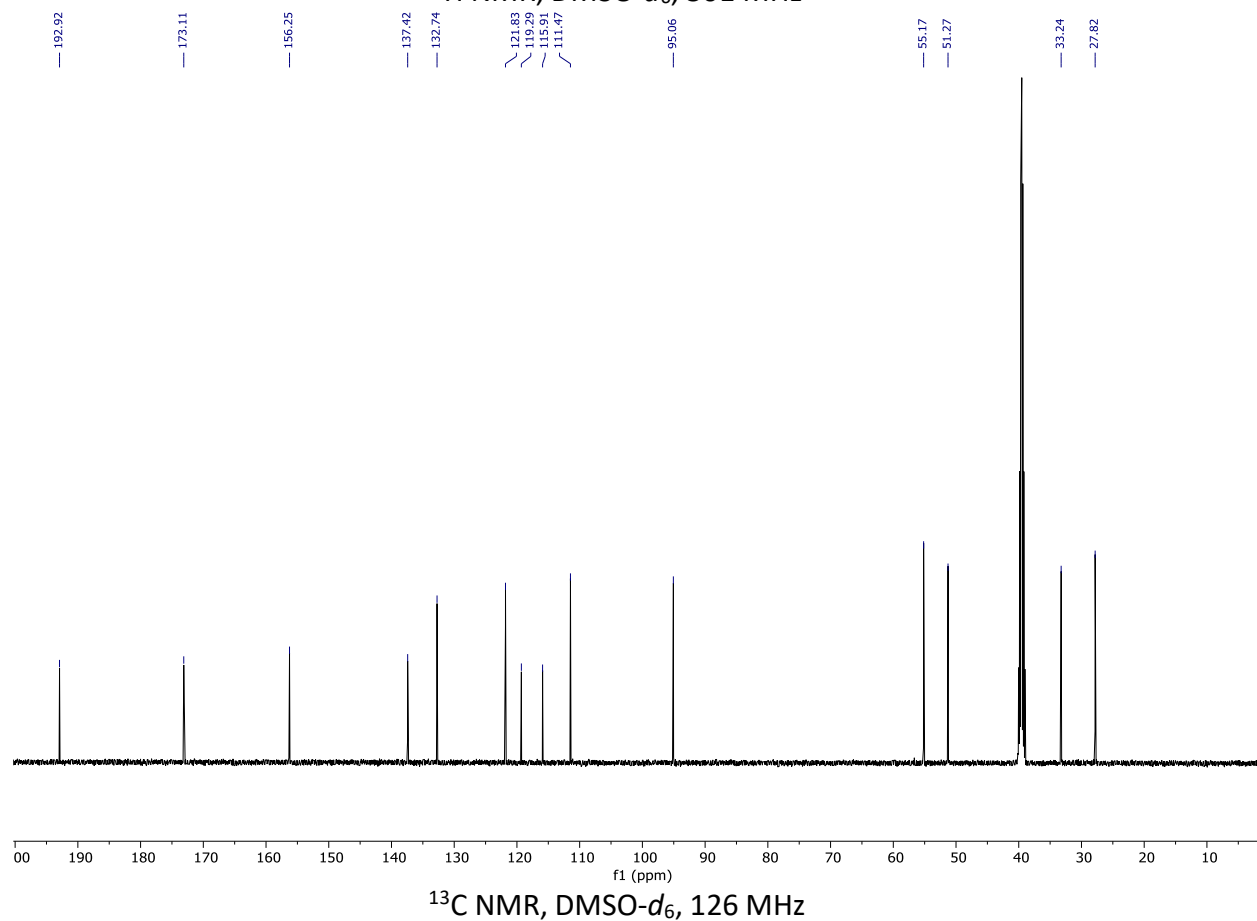

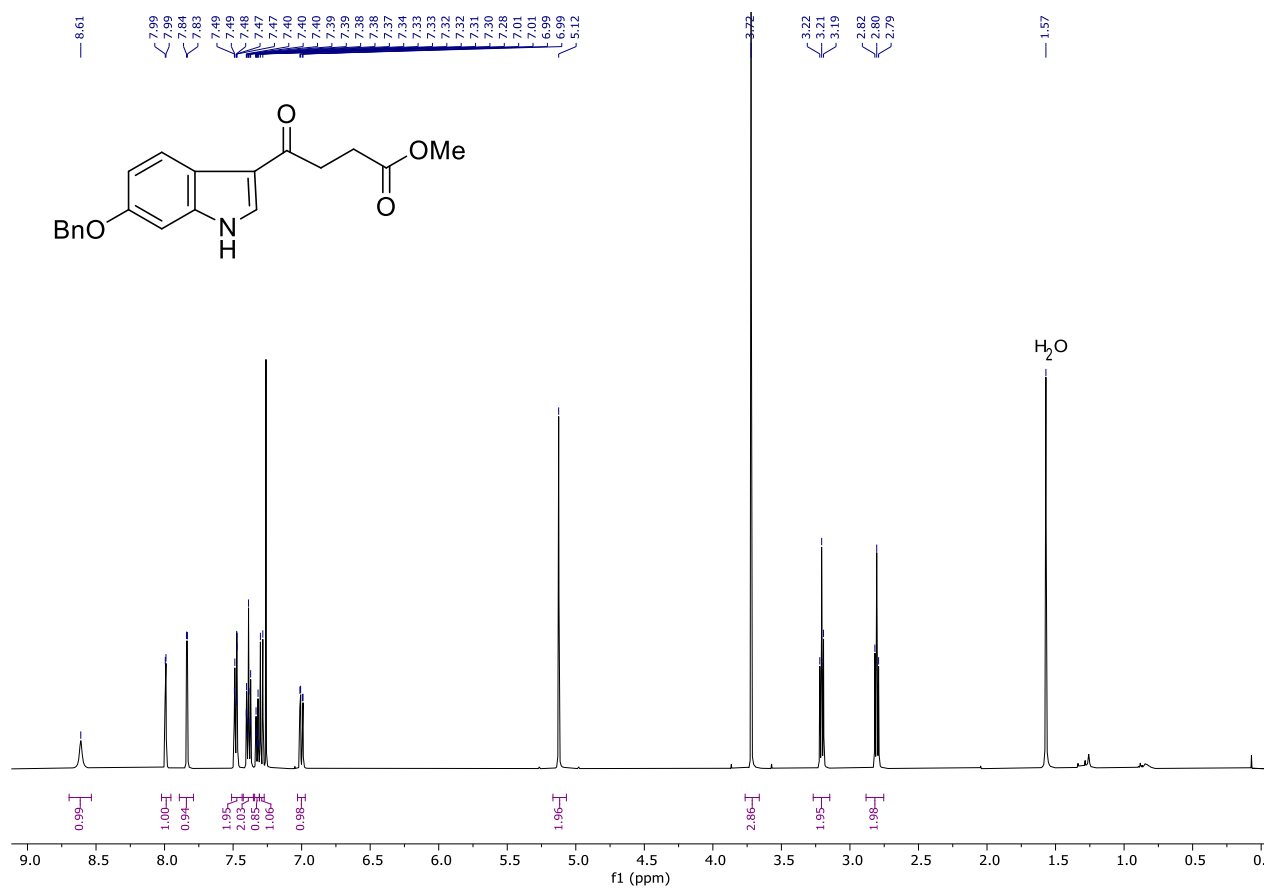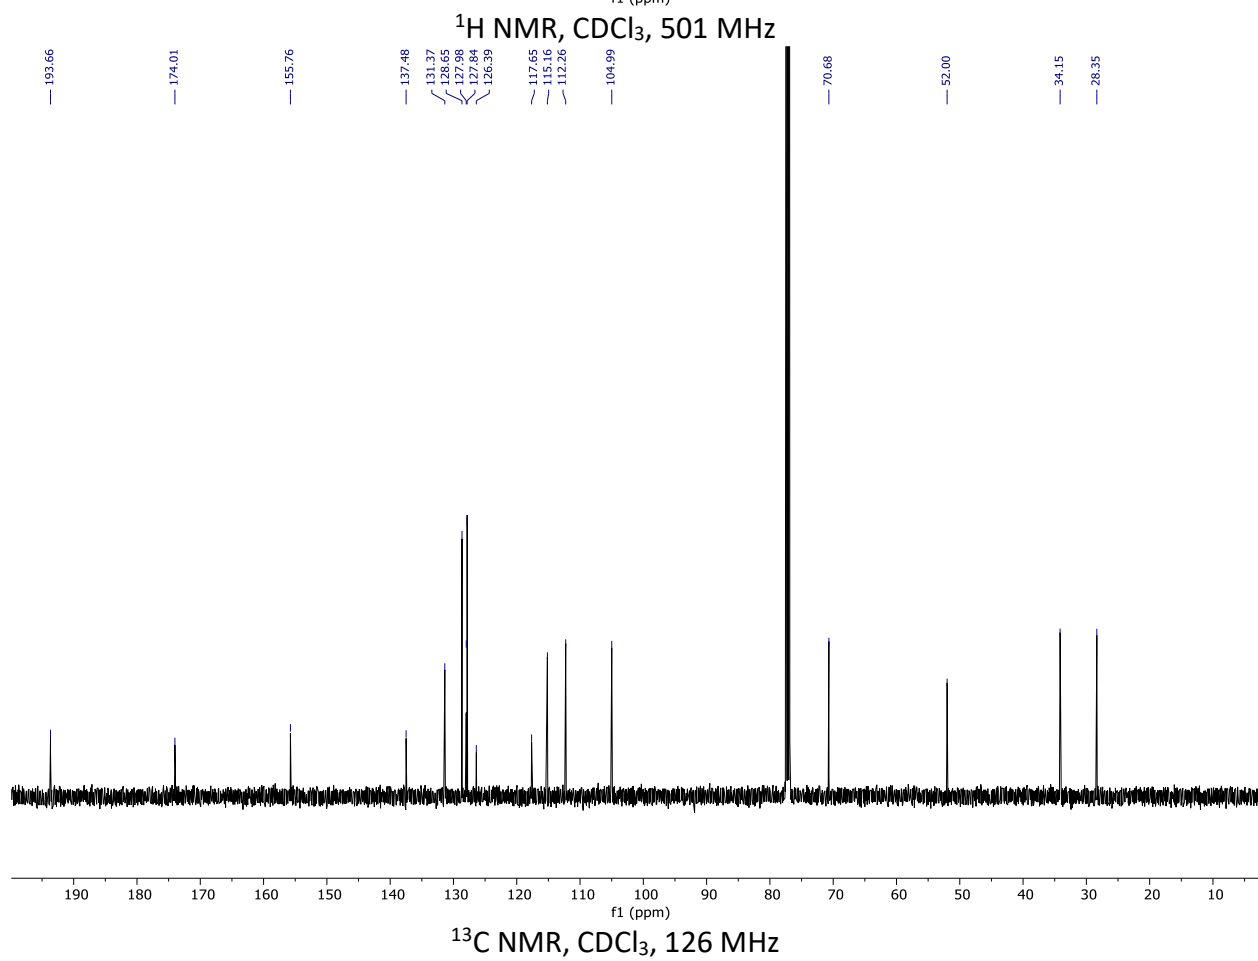

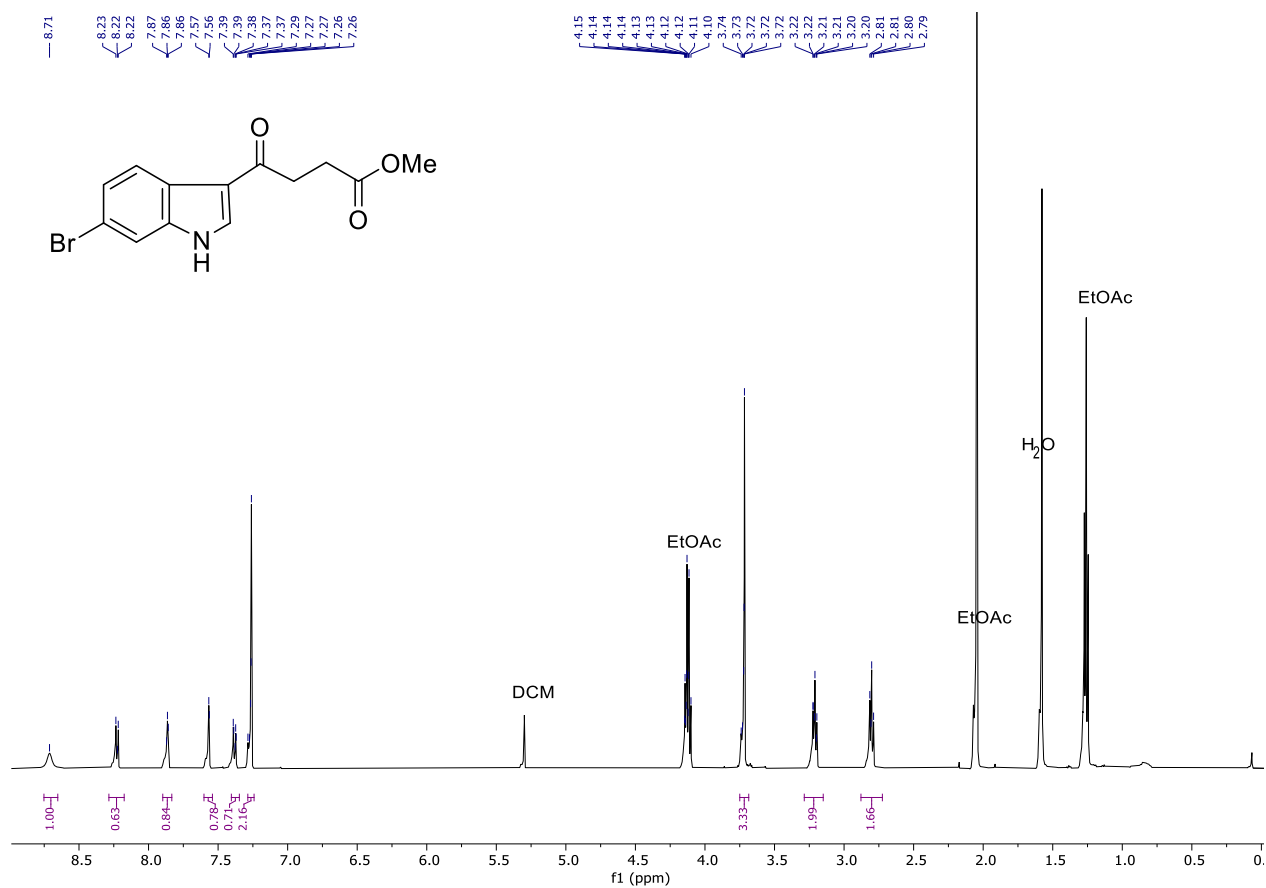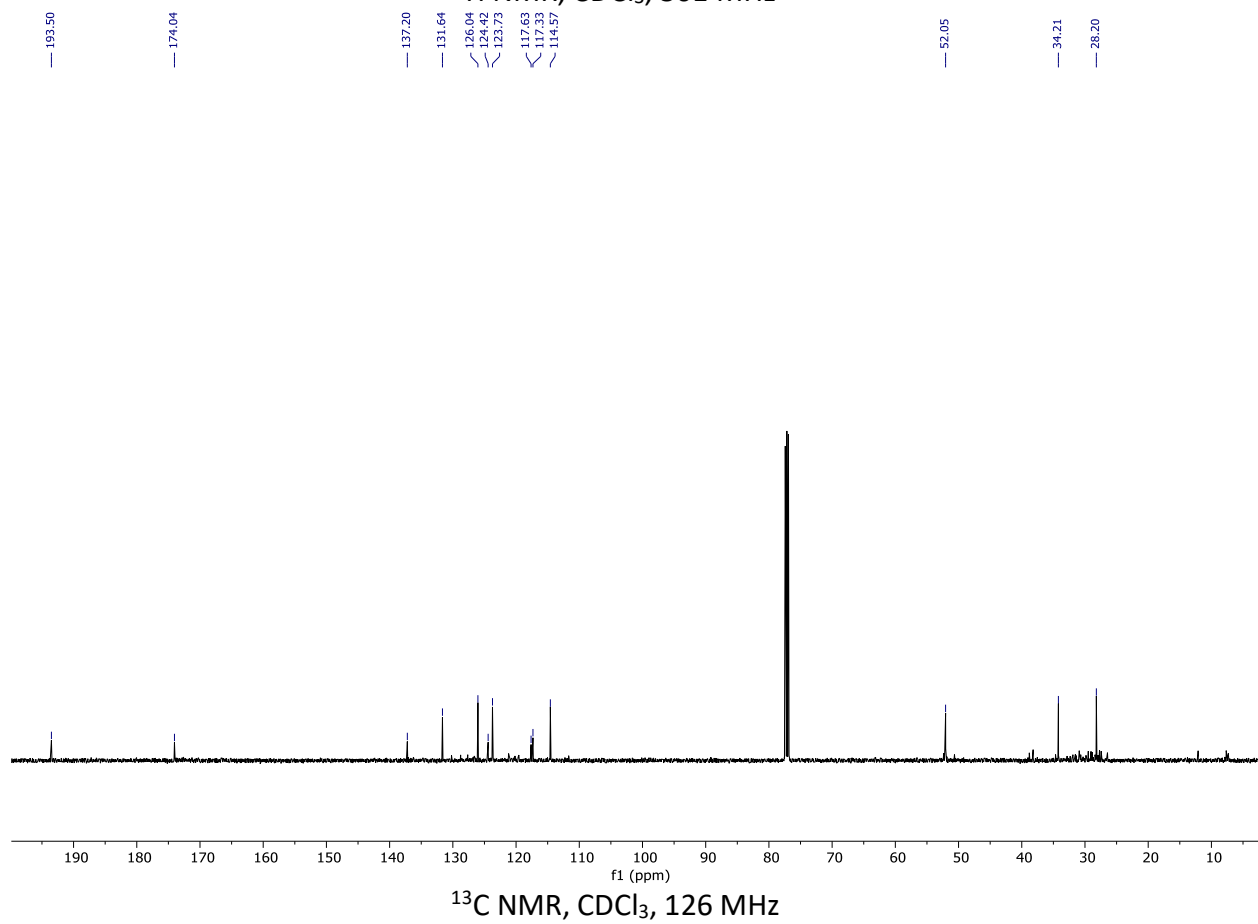

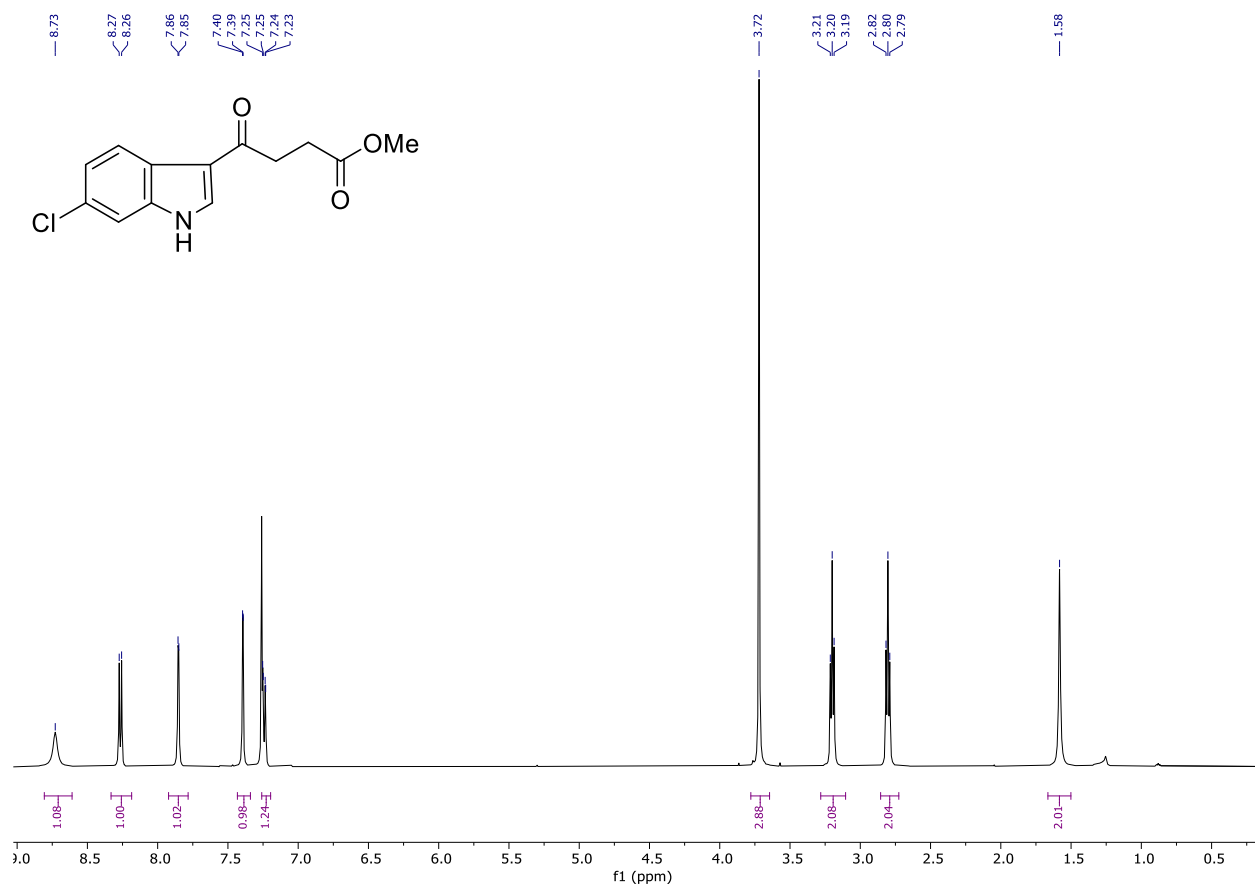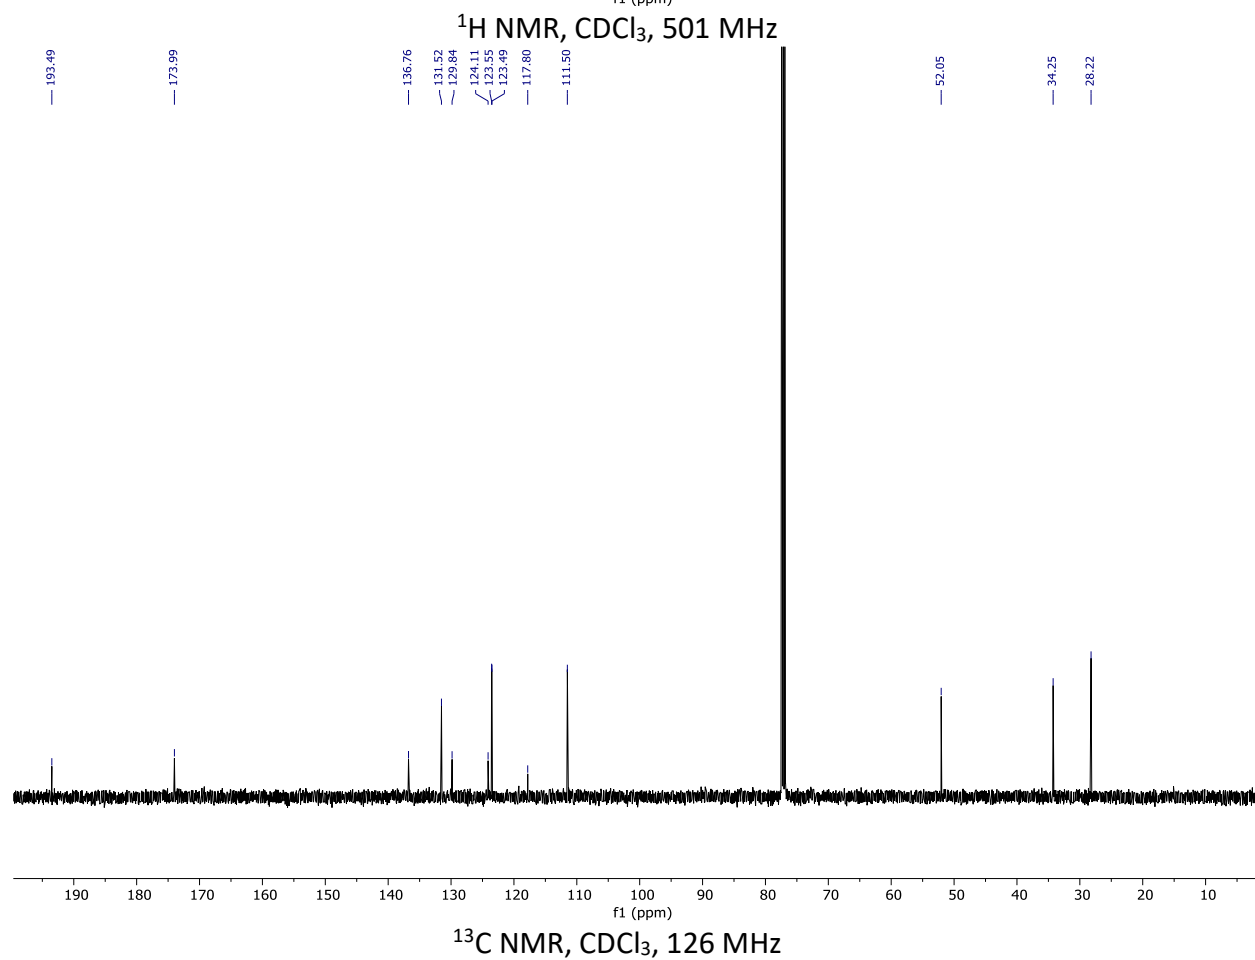

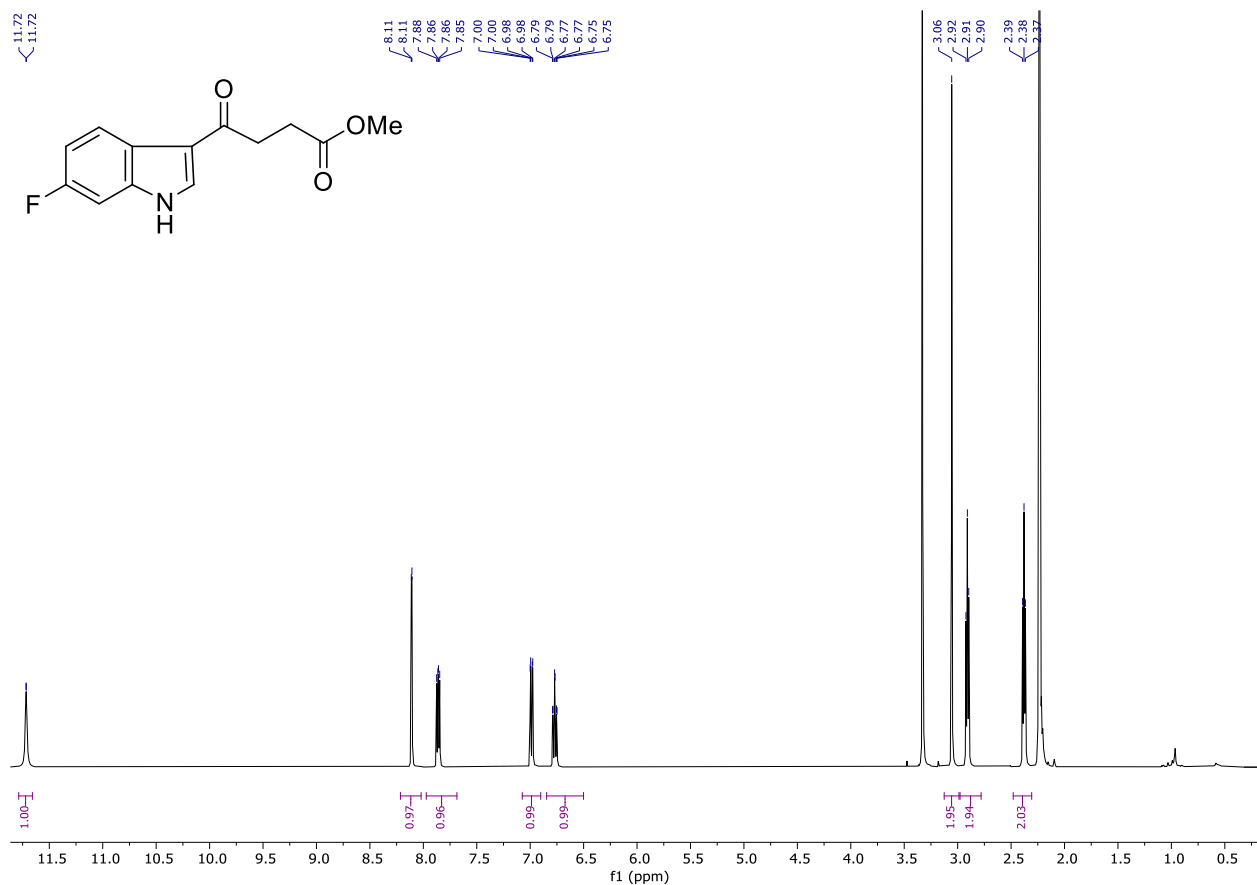

<sup>1</sup>H NMR, DMSO-*d*<sub>6</sub>, 501 MHz

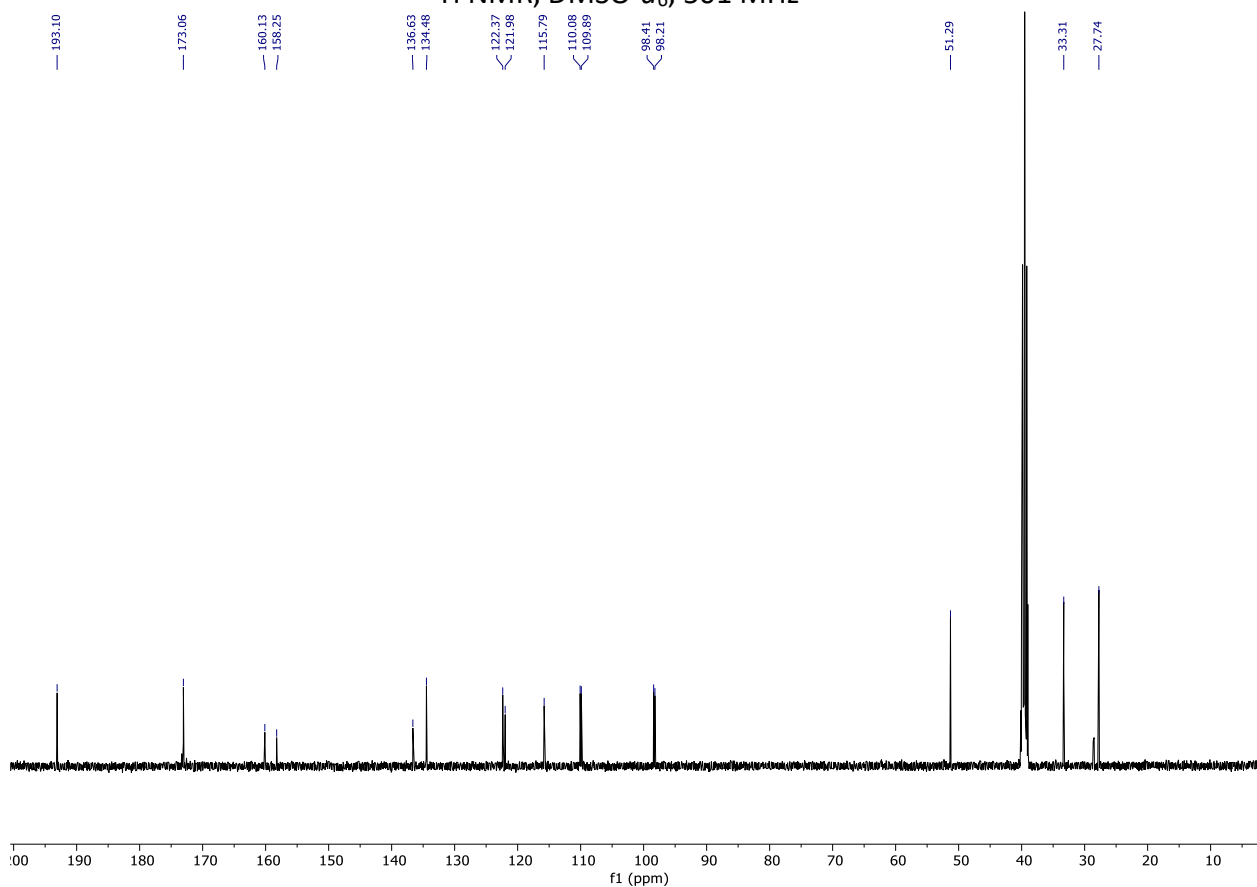

<sup>13</sup>C NMR, DMSO-*d*<sub>6</sub>, 126 MHz

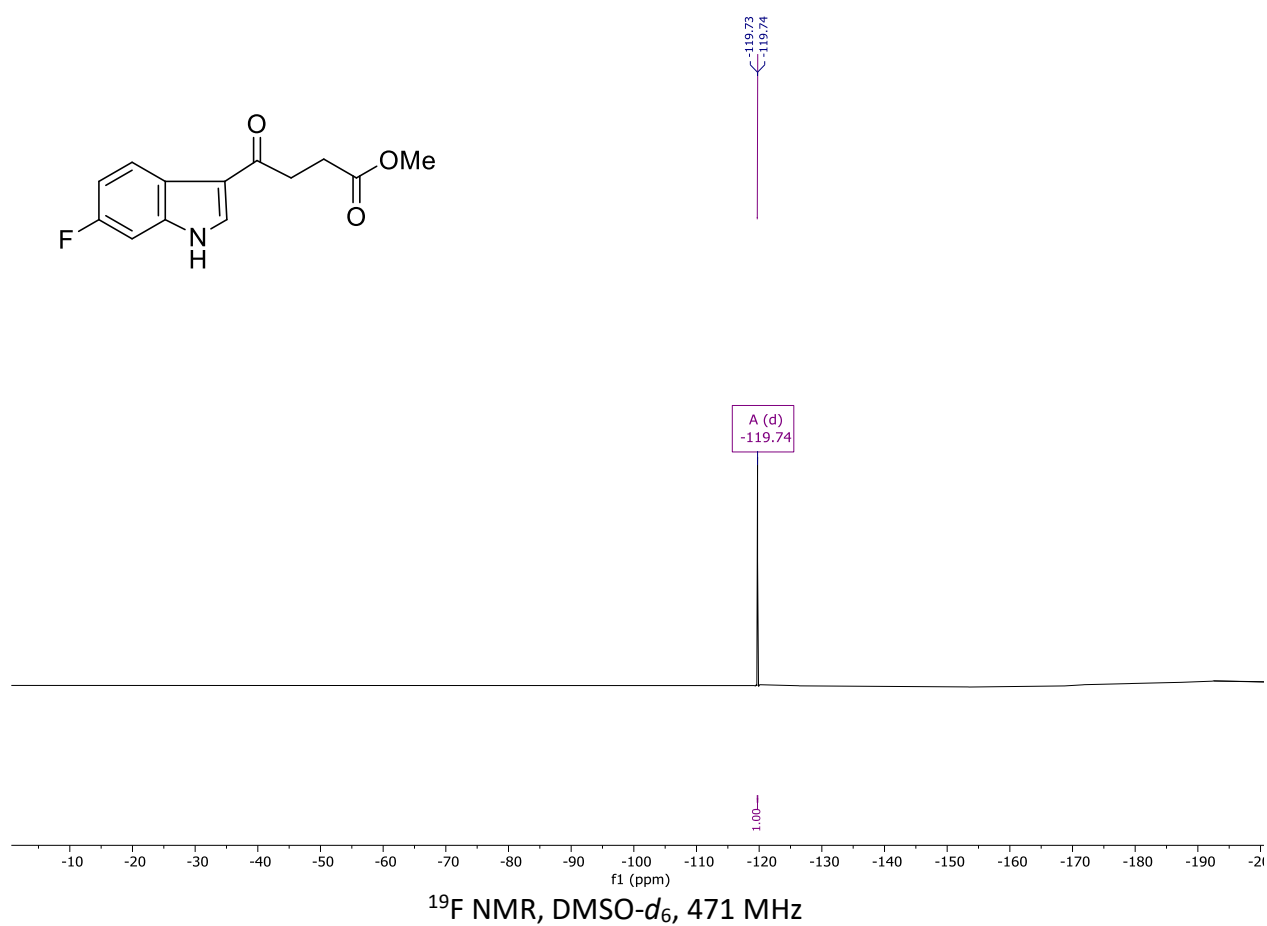

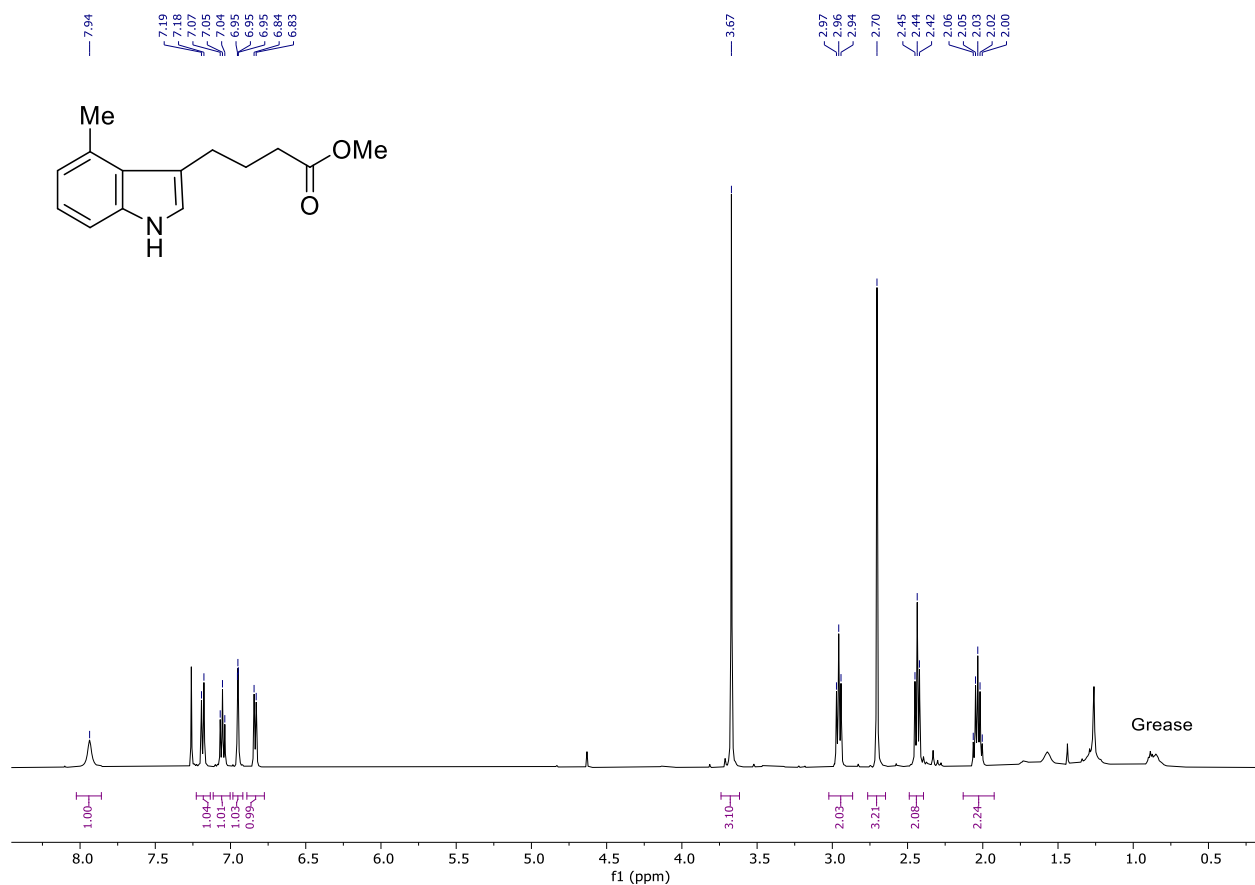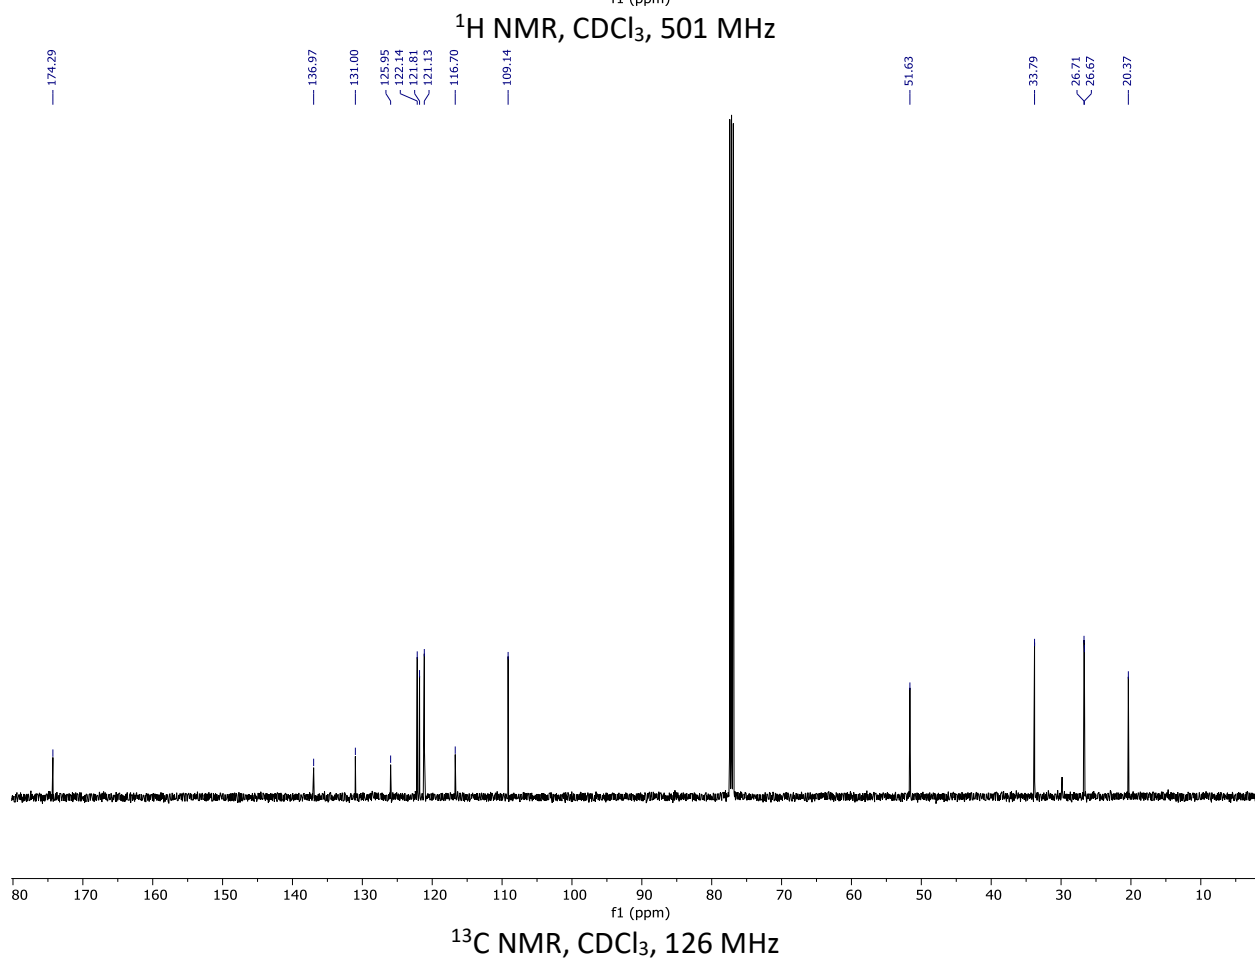

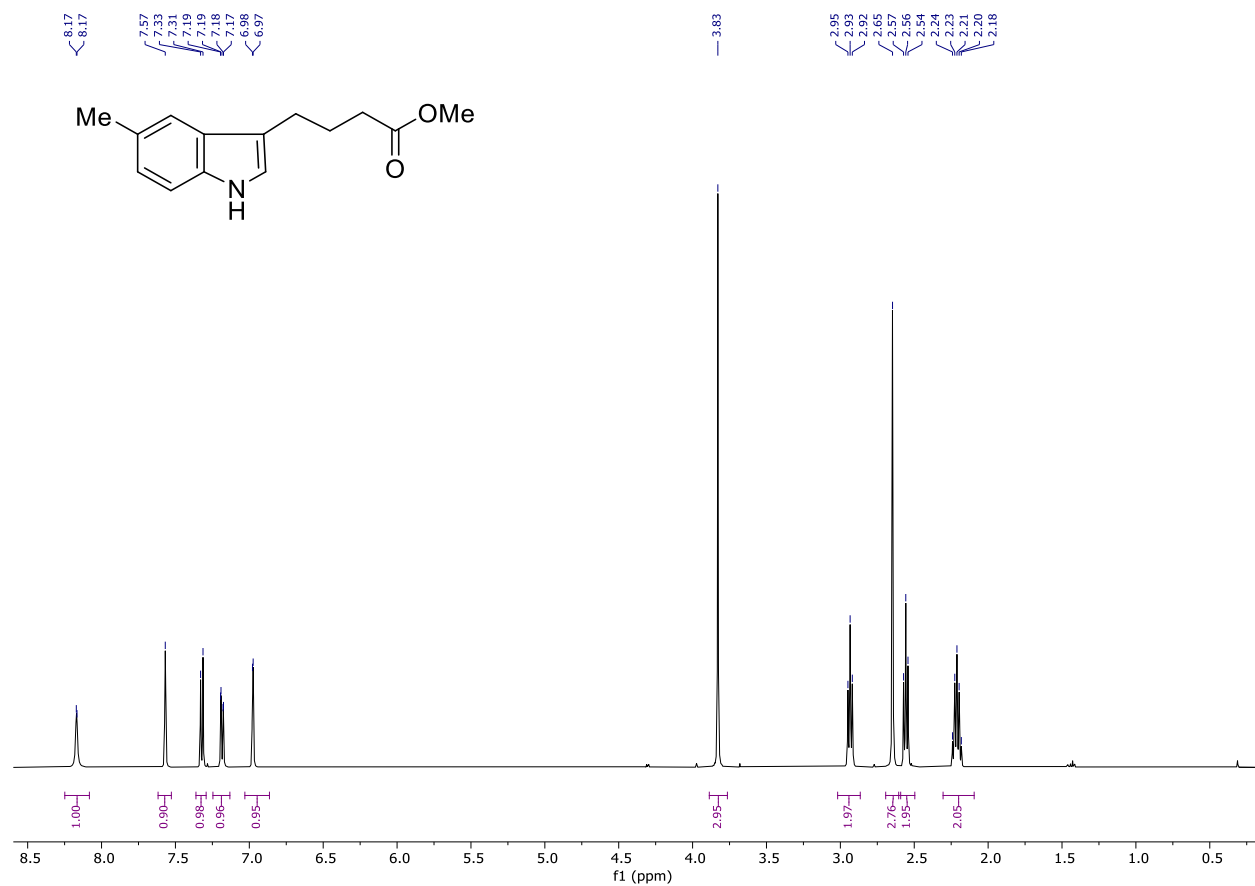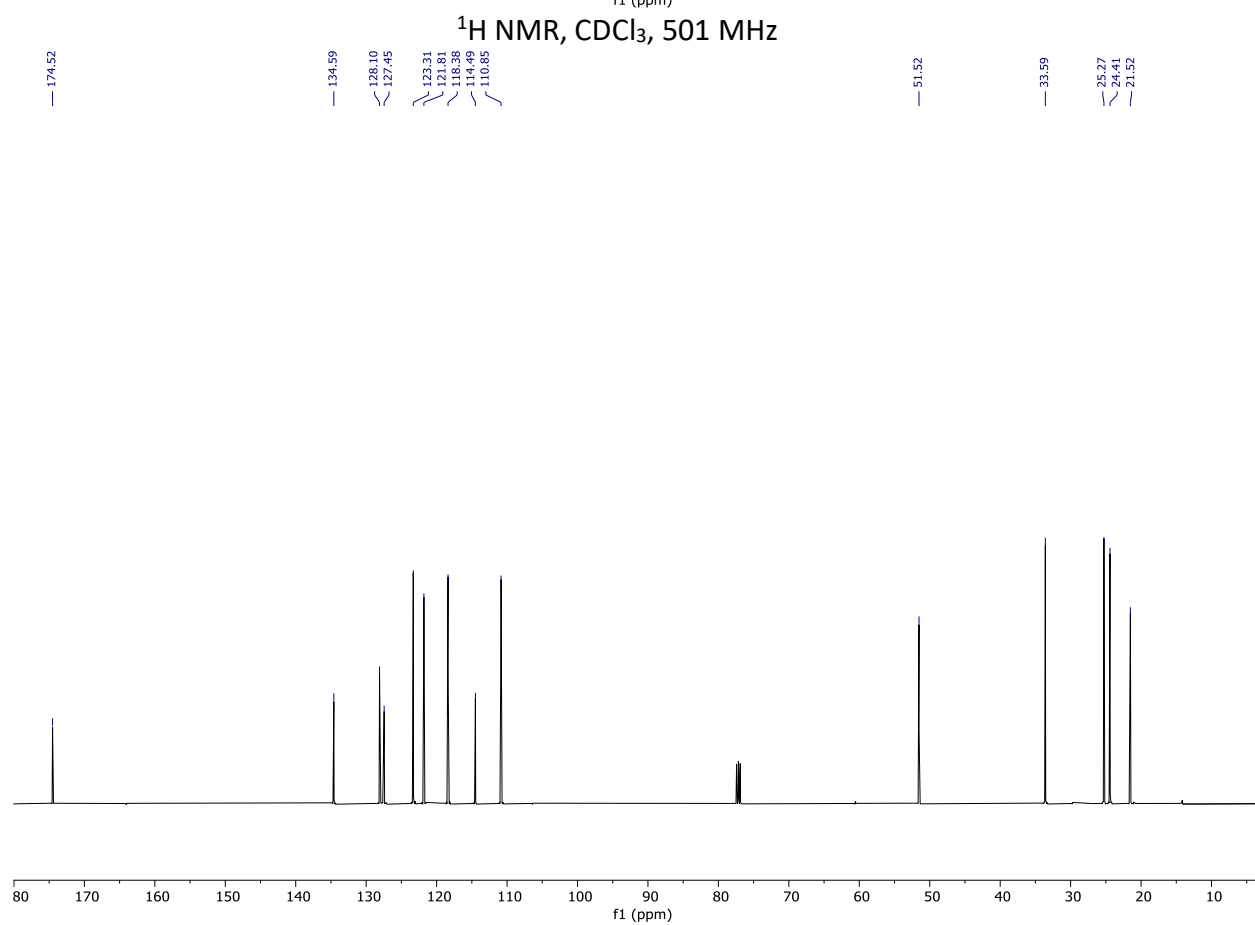

<sup>13</sup>C NMR, CDCl<sub>3</sub>, 126 MHz

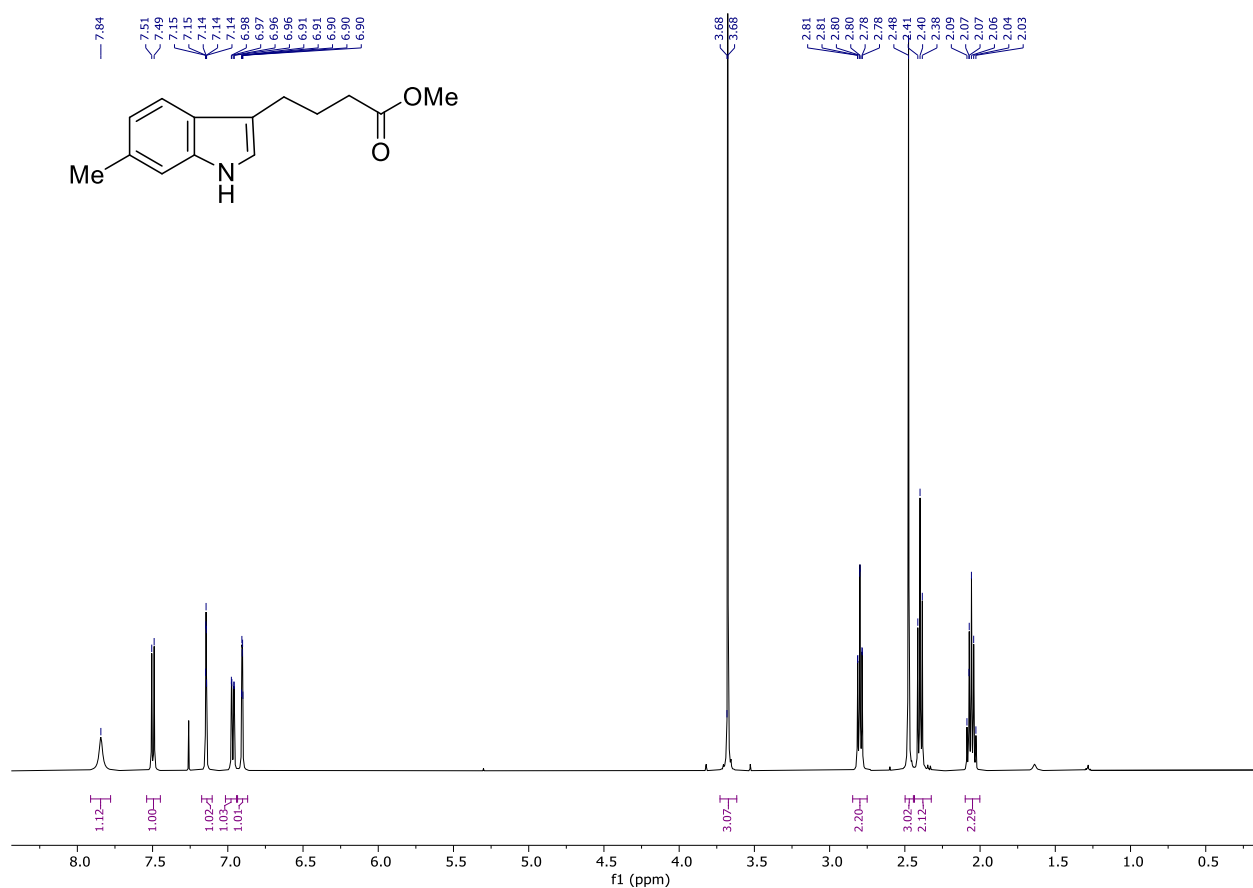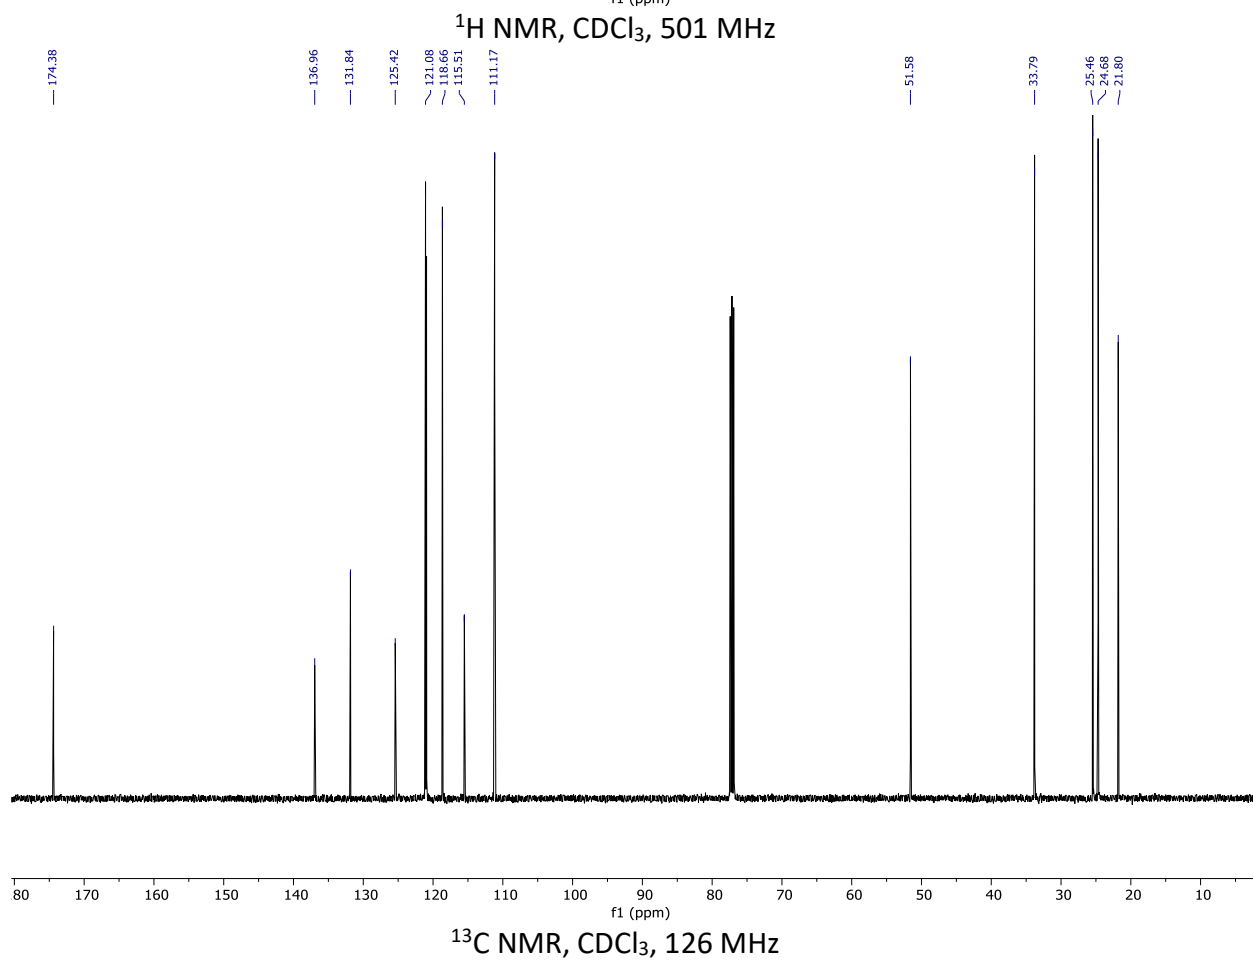

<sup>13</sup>C NMR, CDCl<sub>3</sub>, 126 MHz

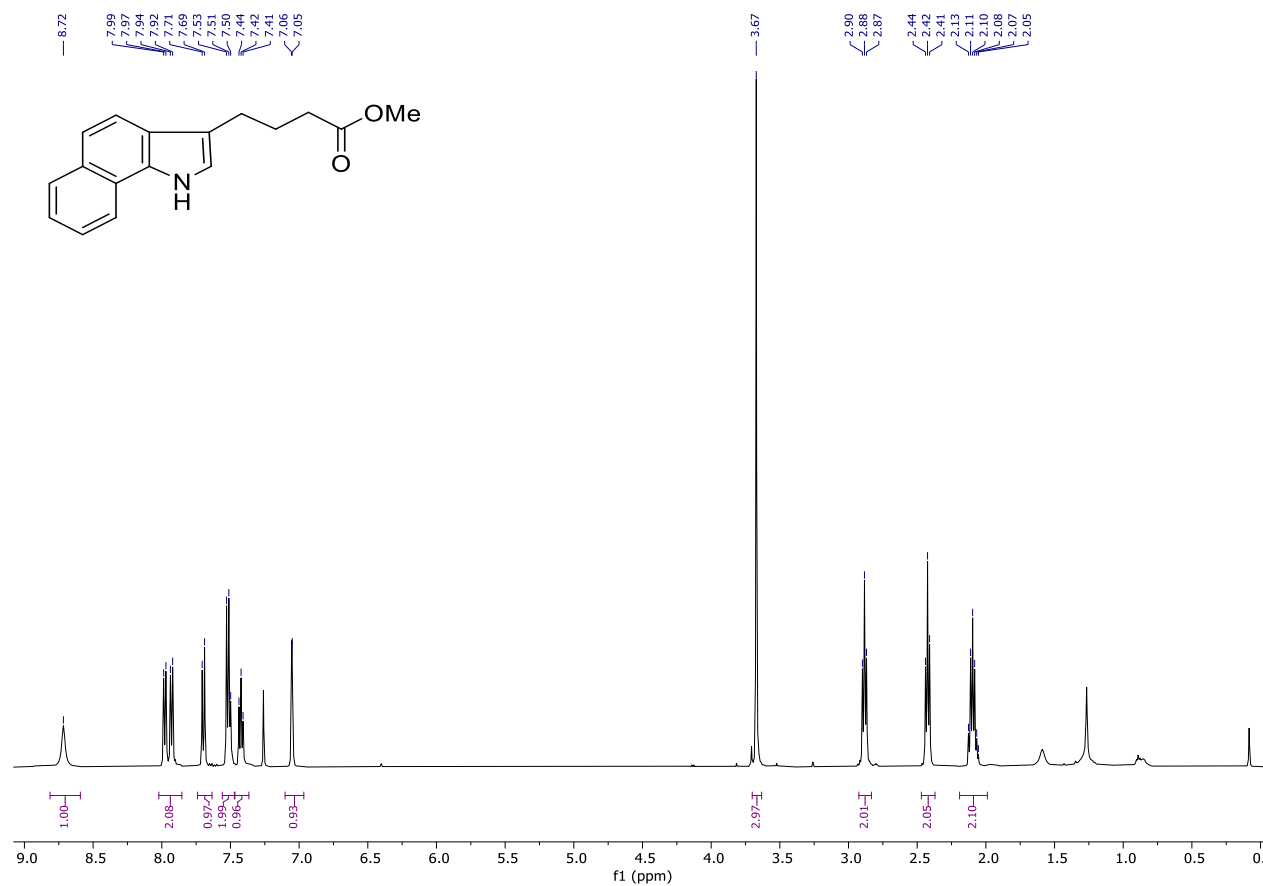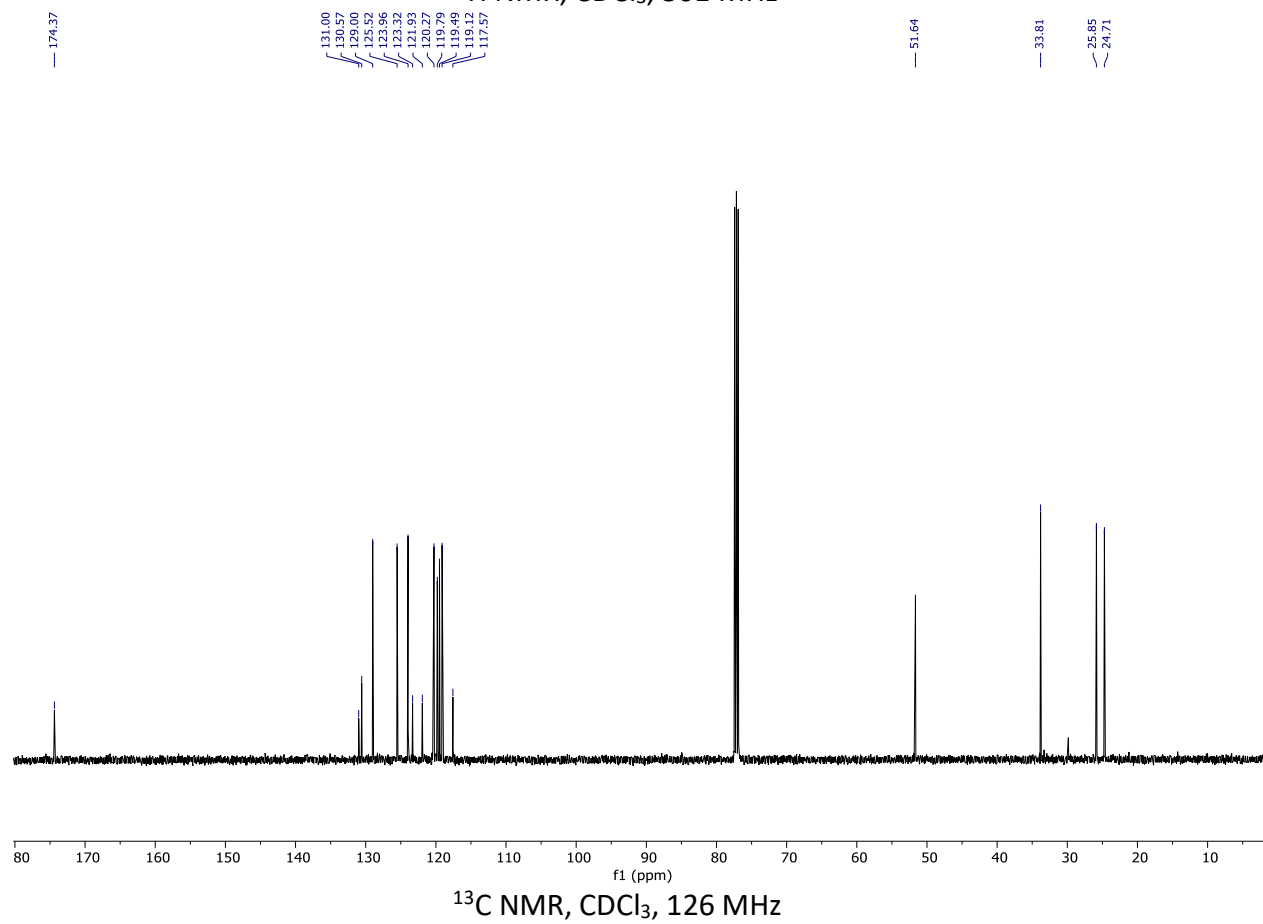

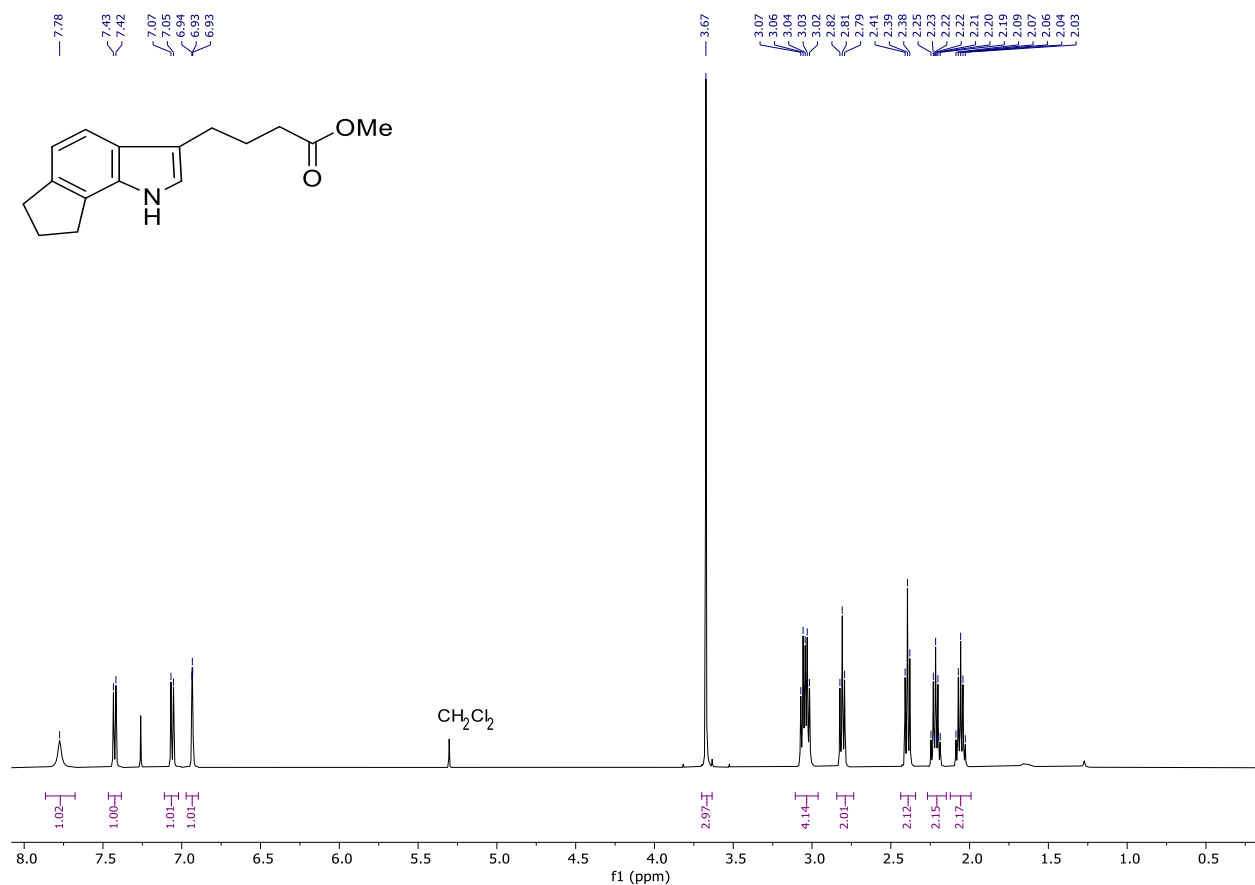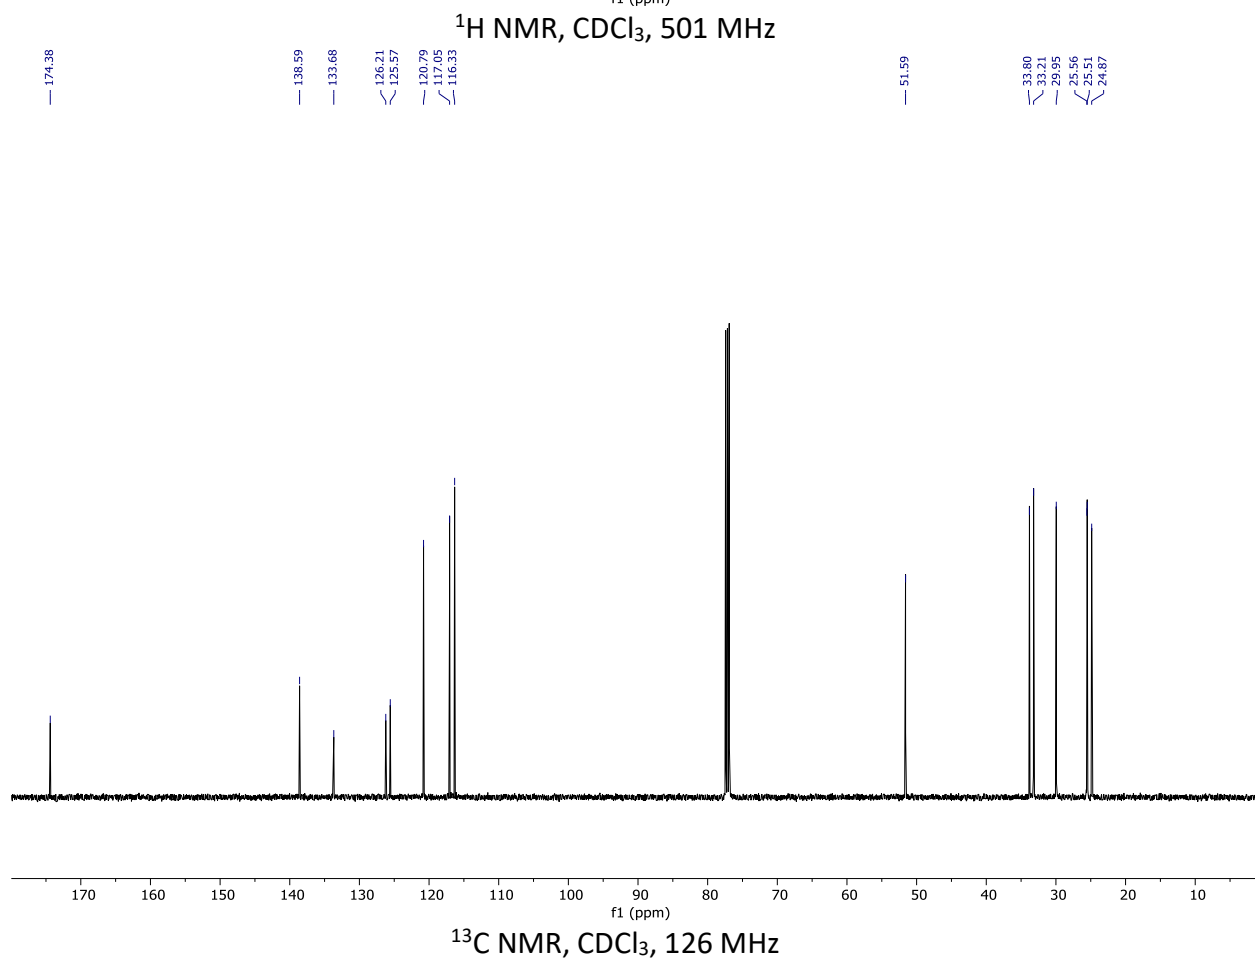

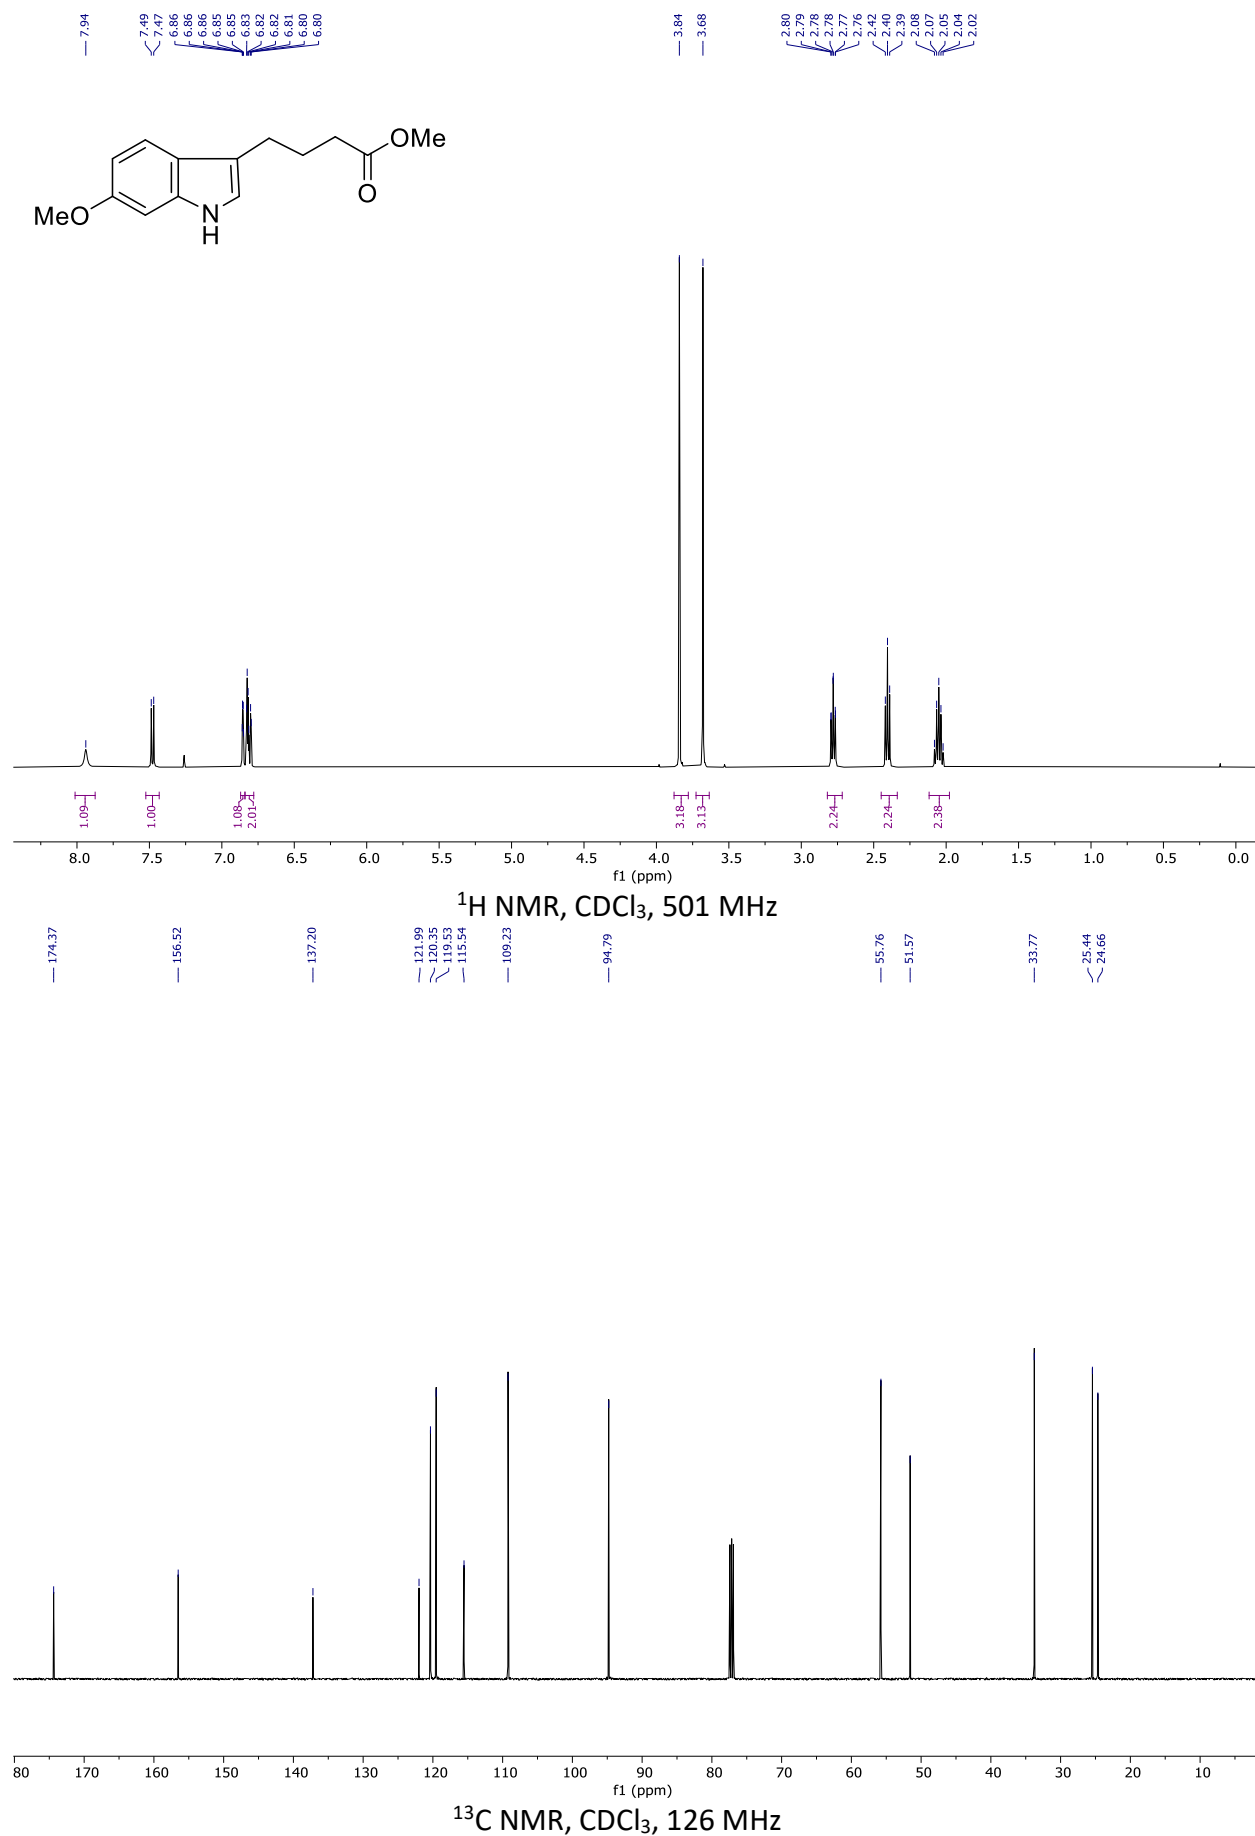

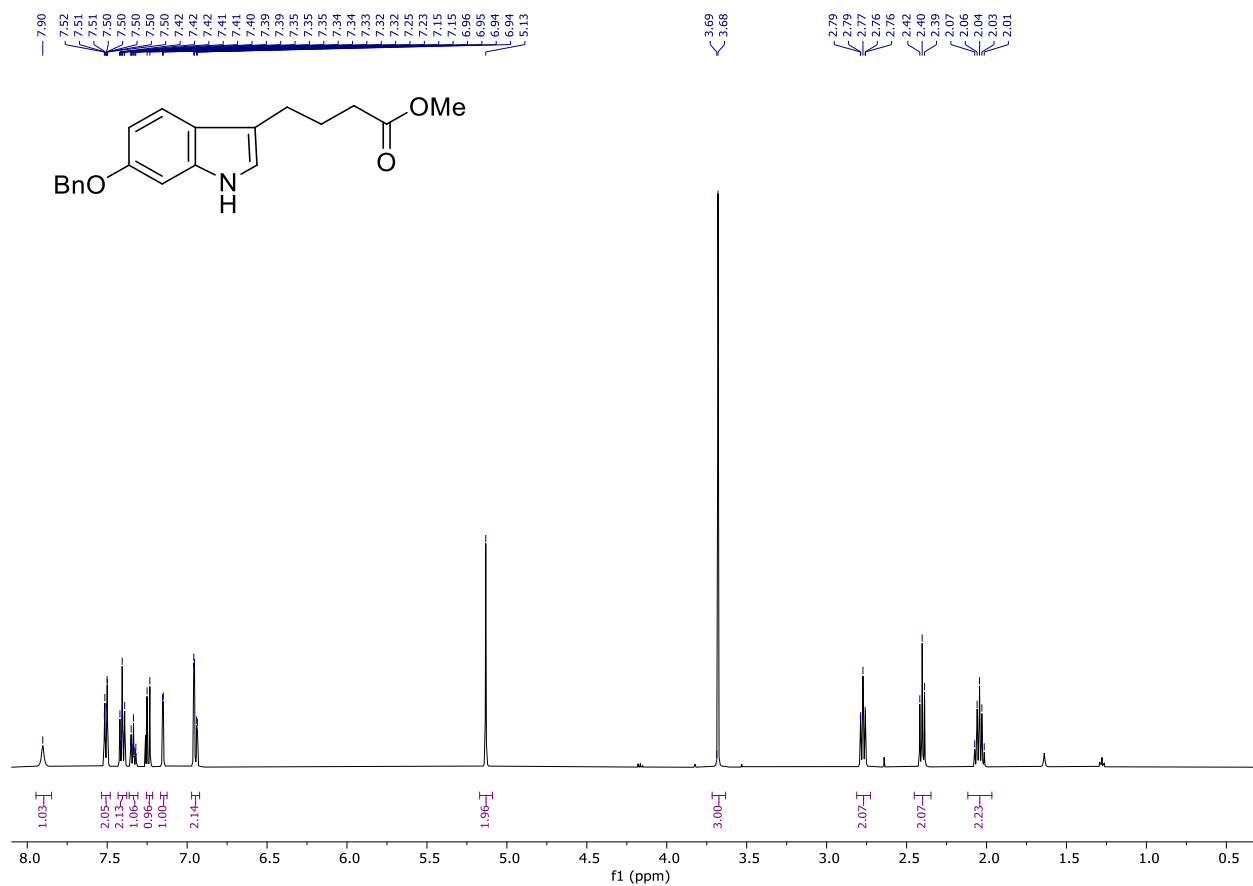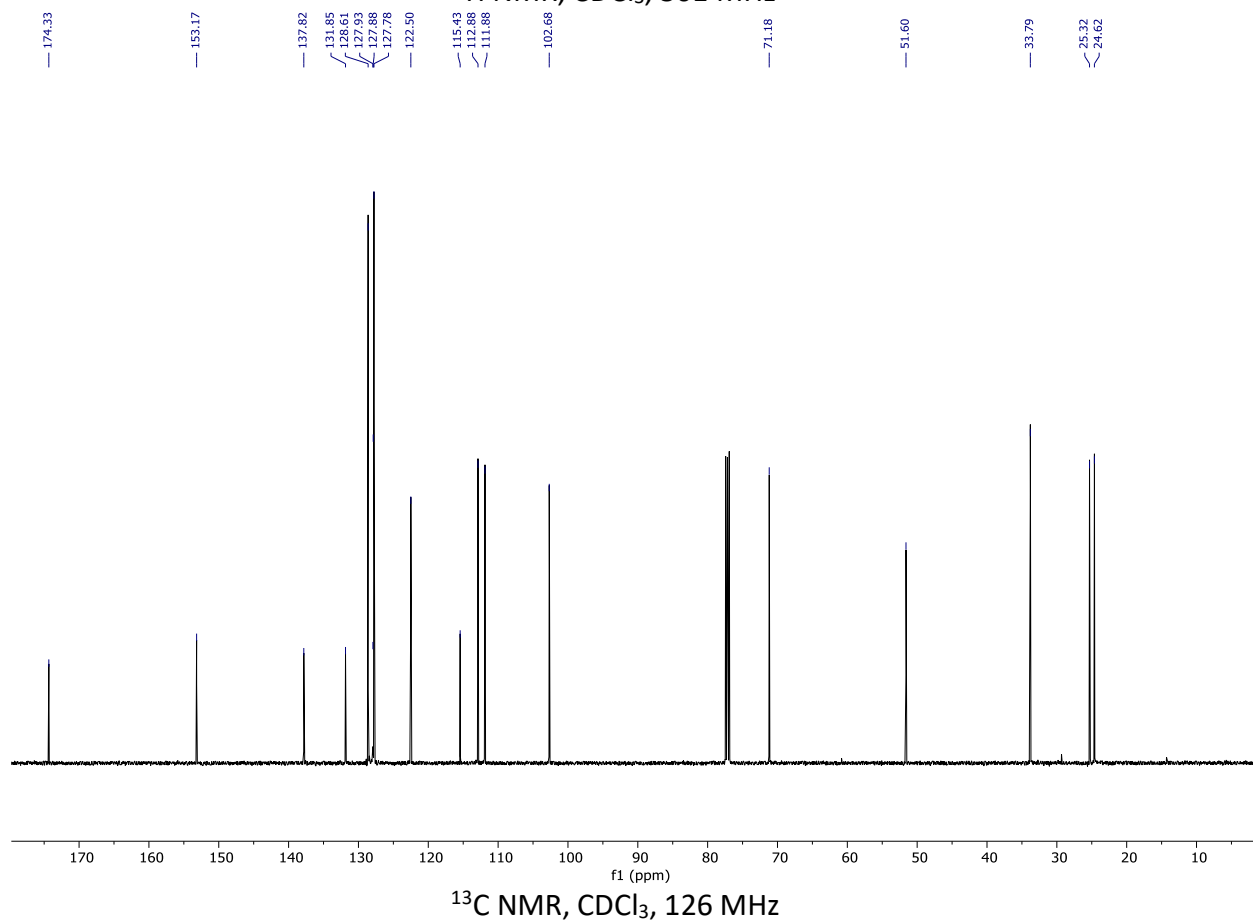

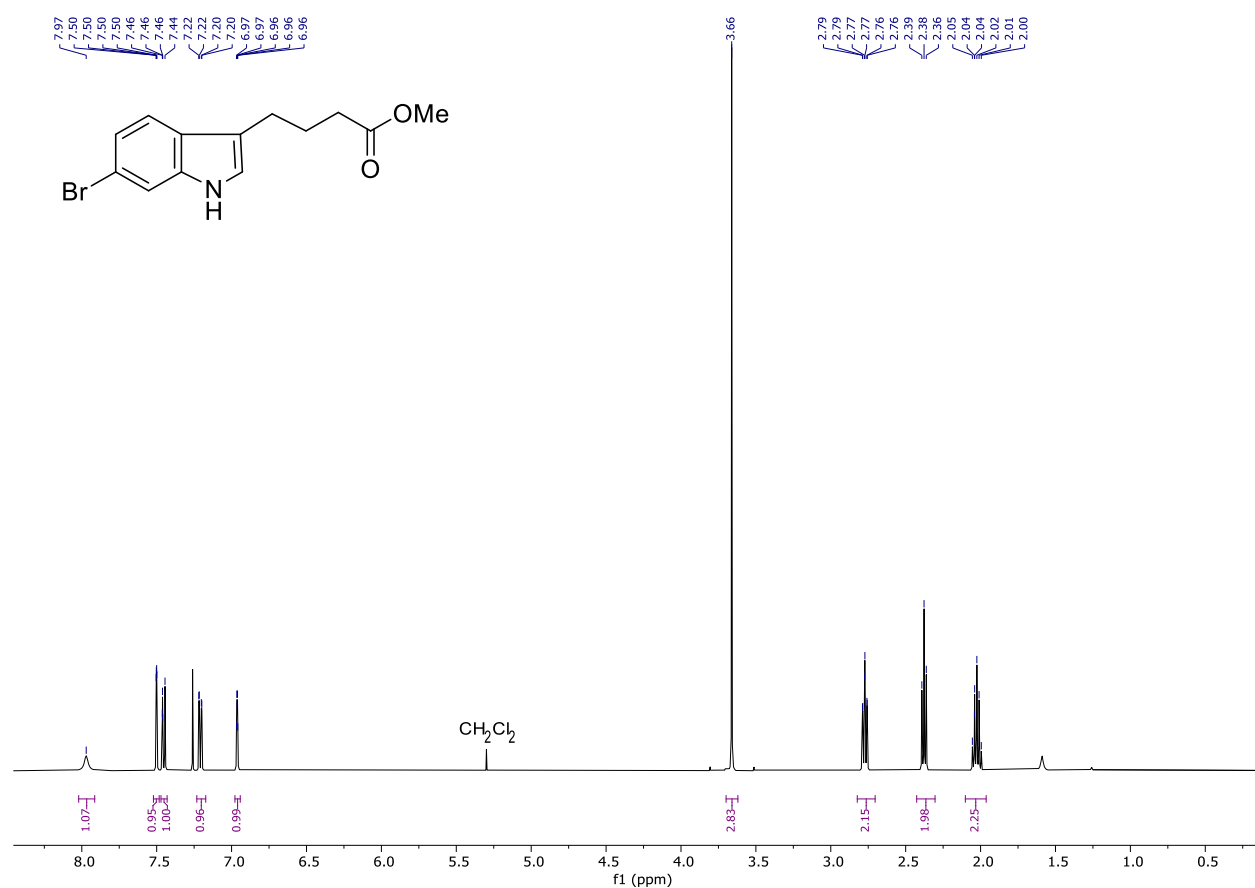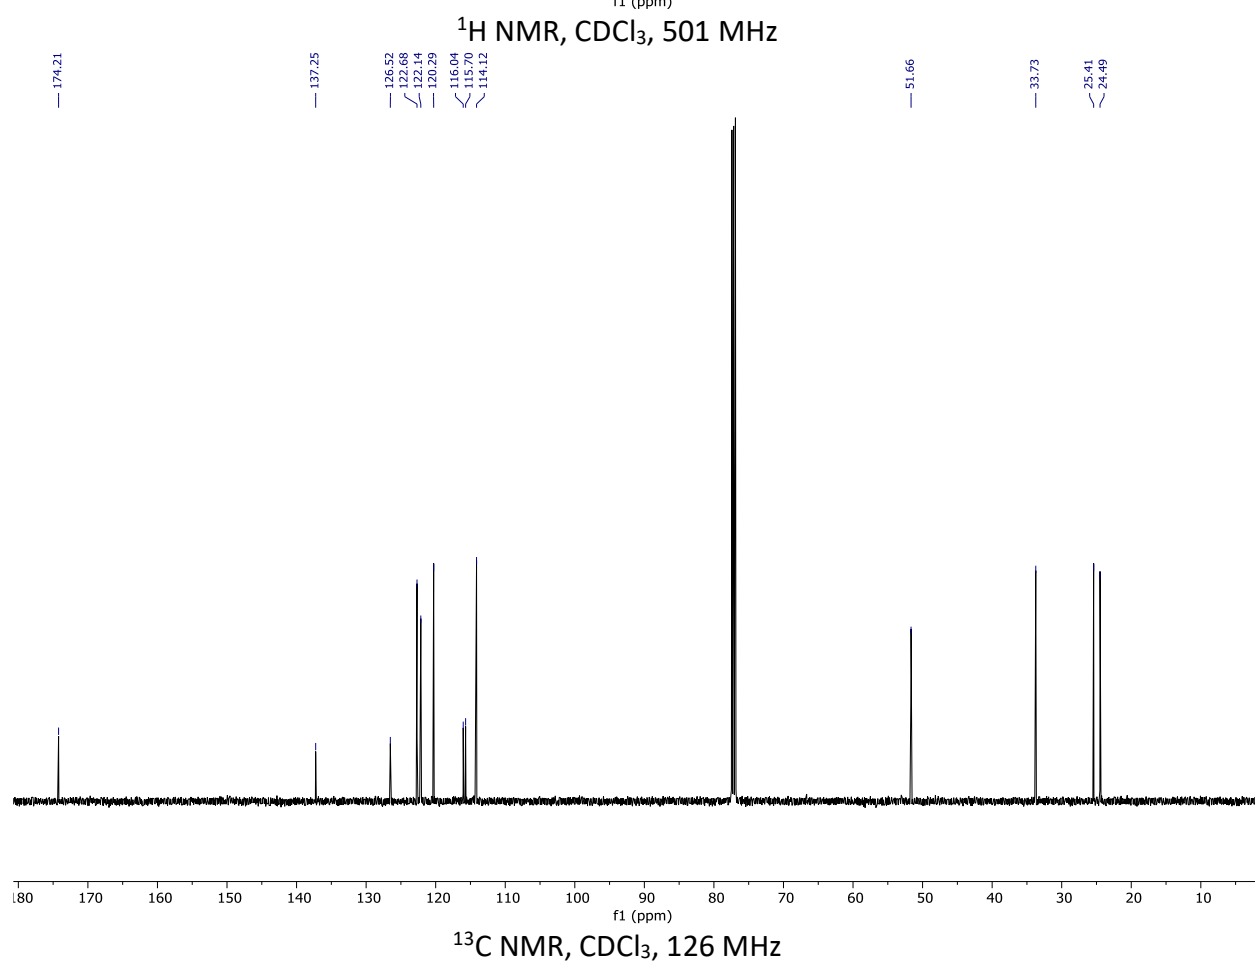

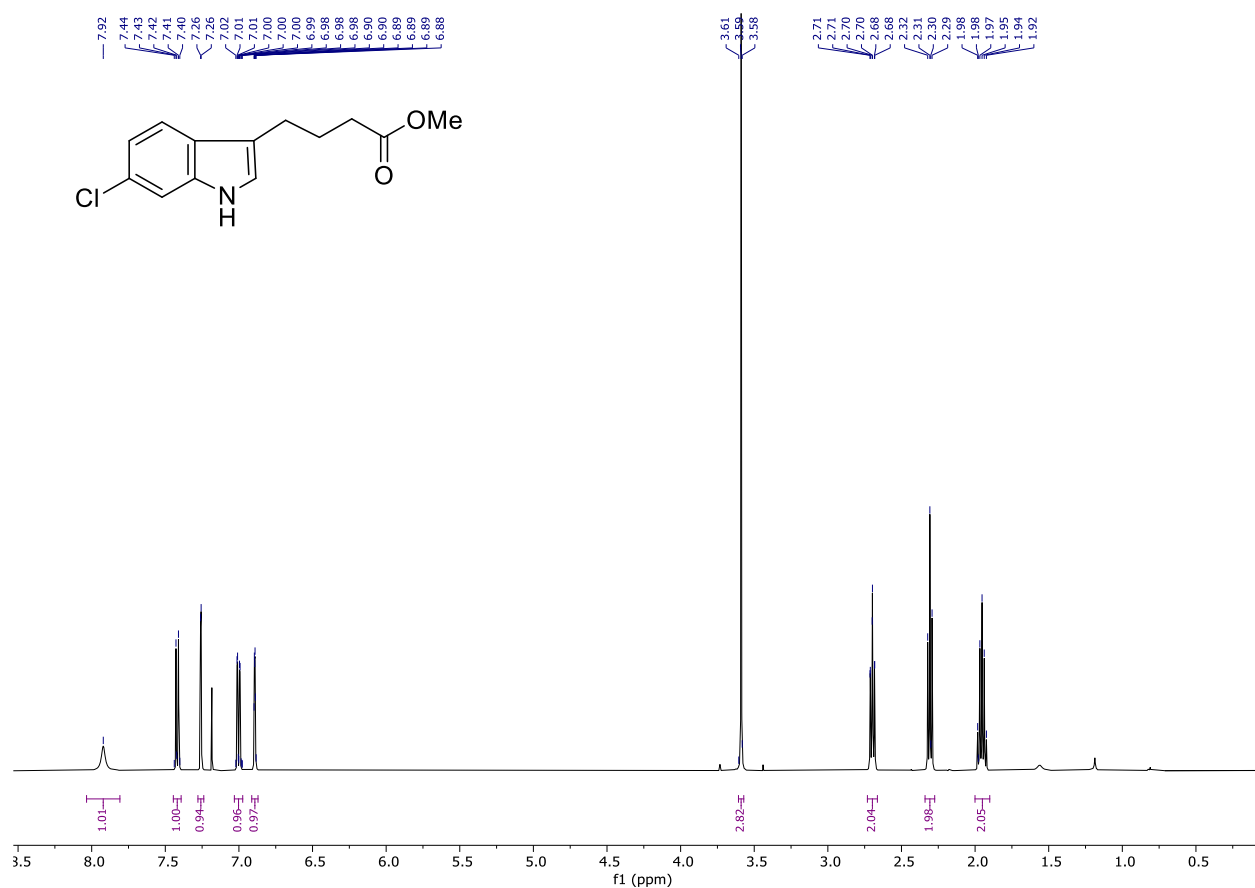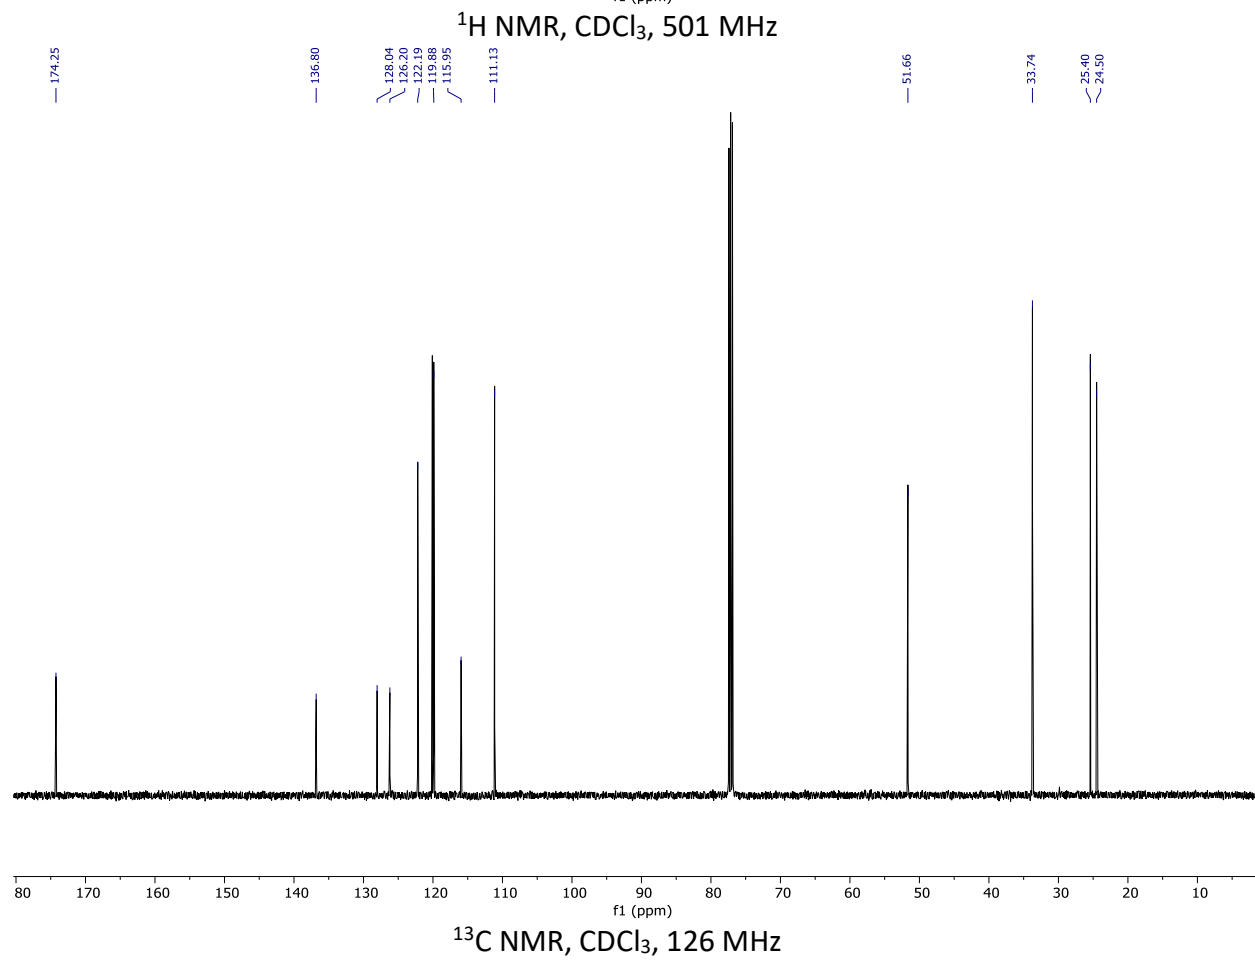

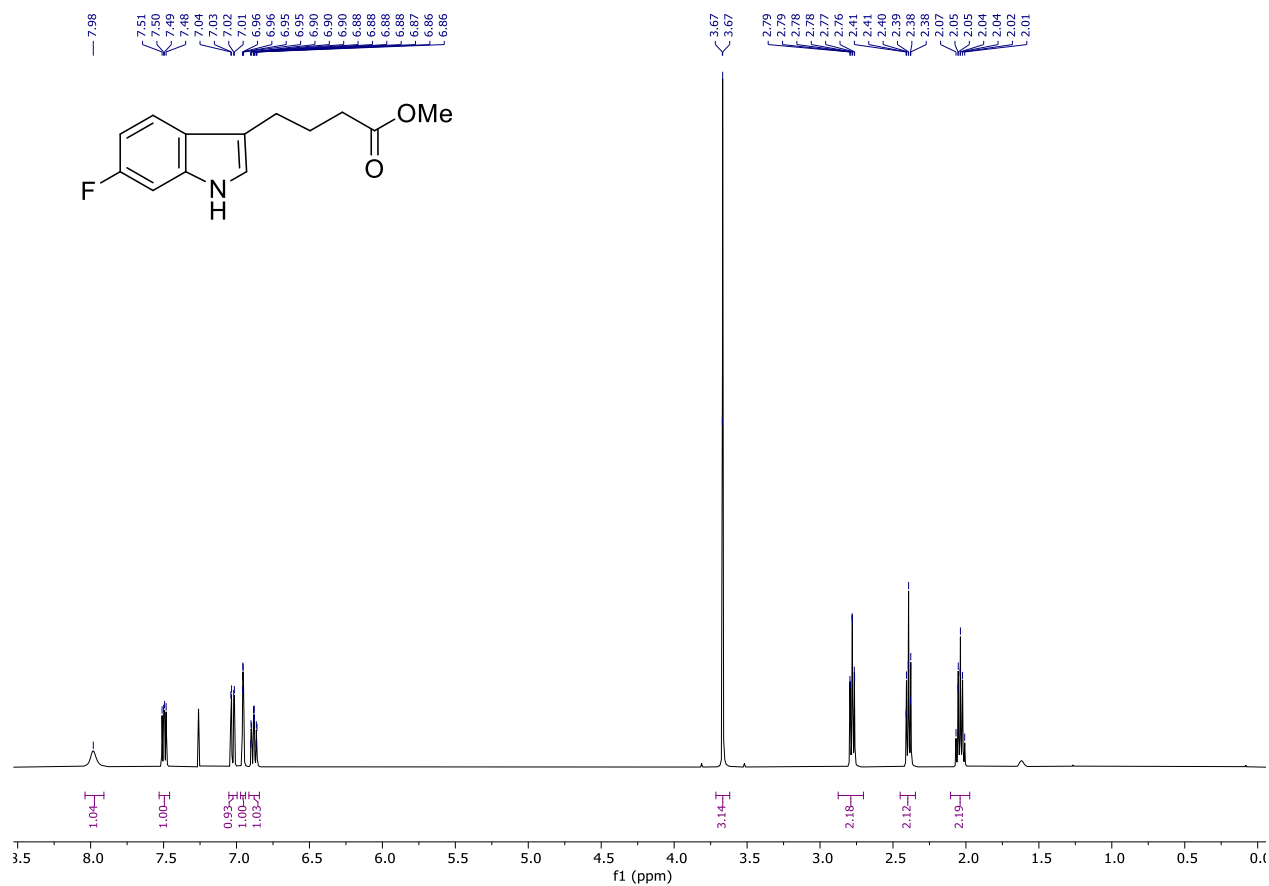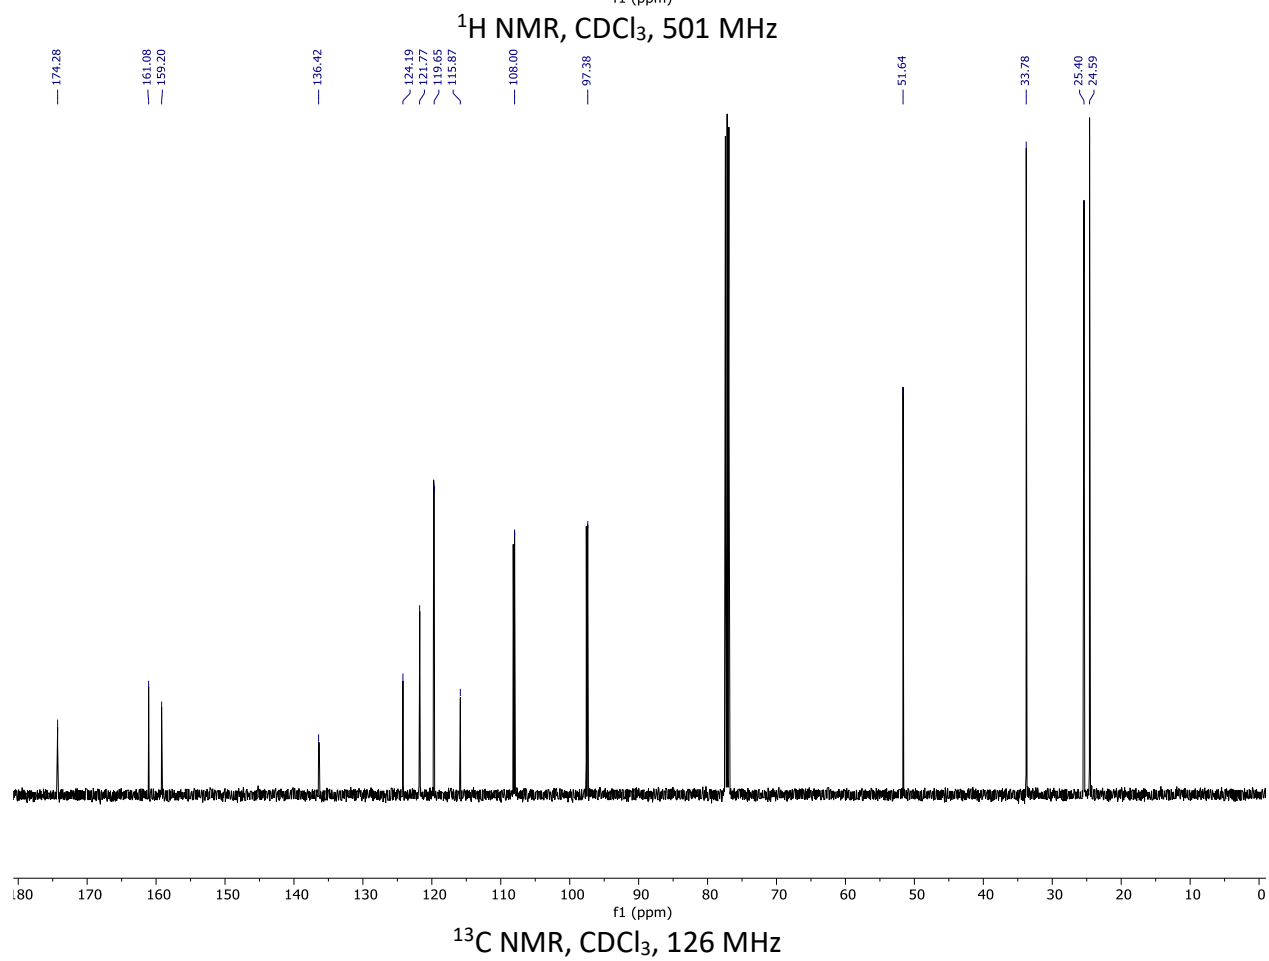

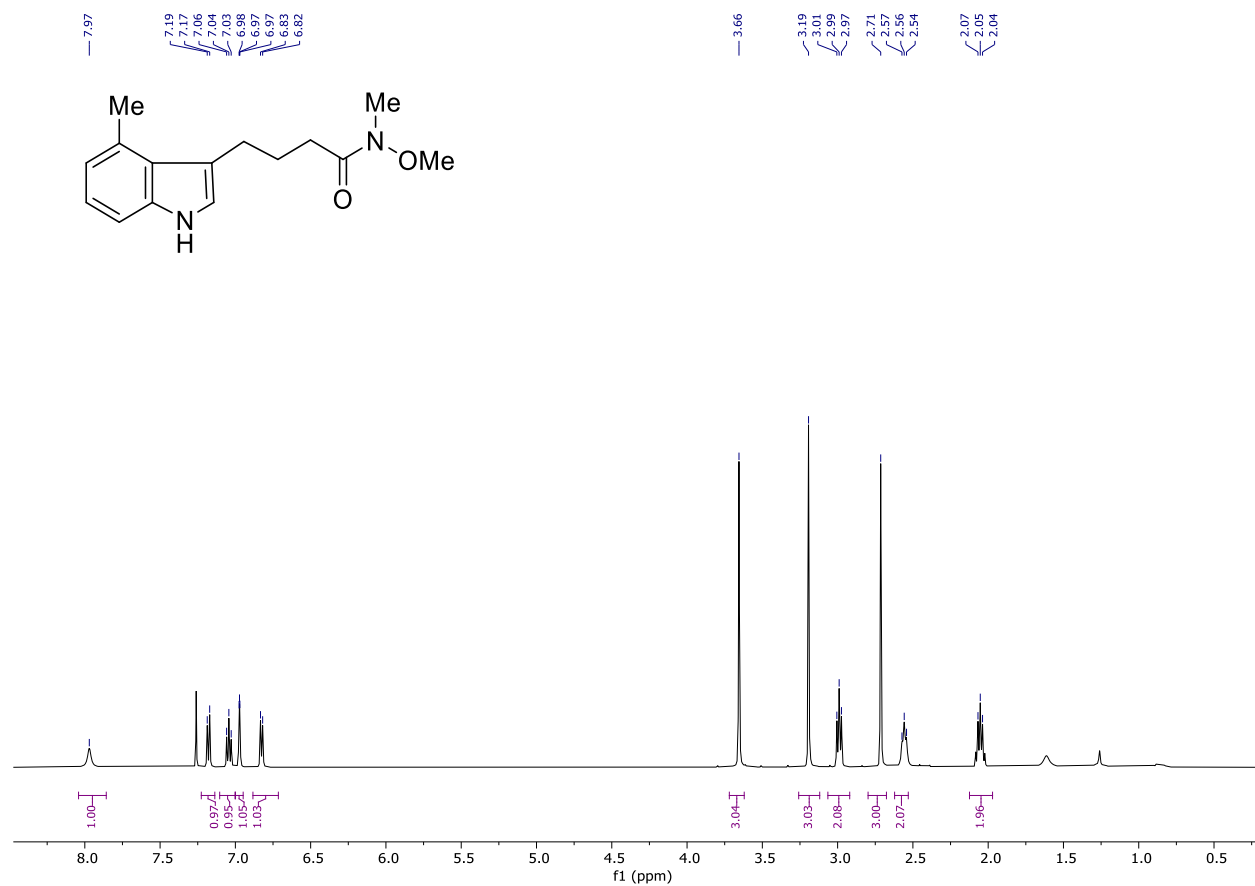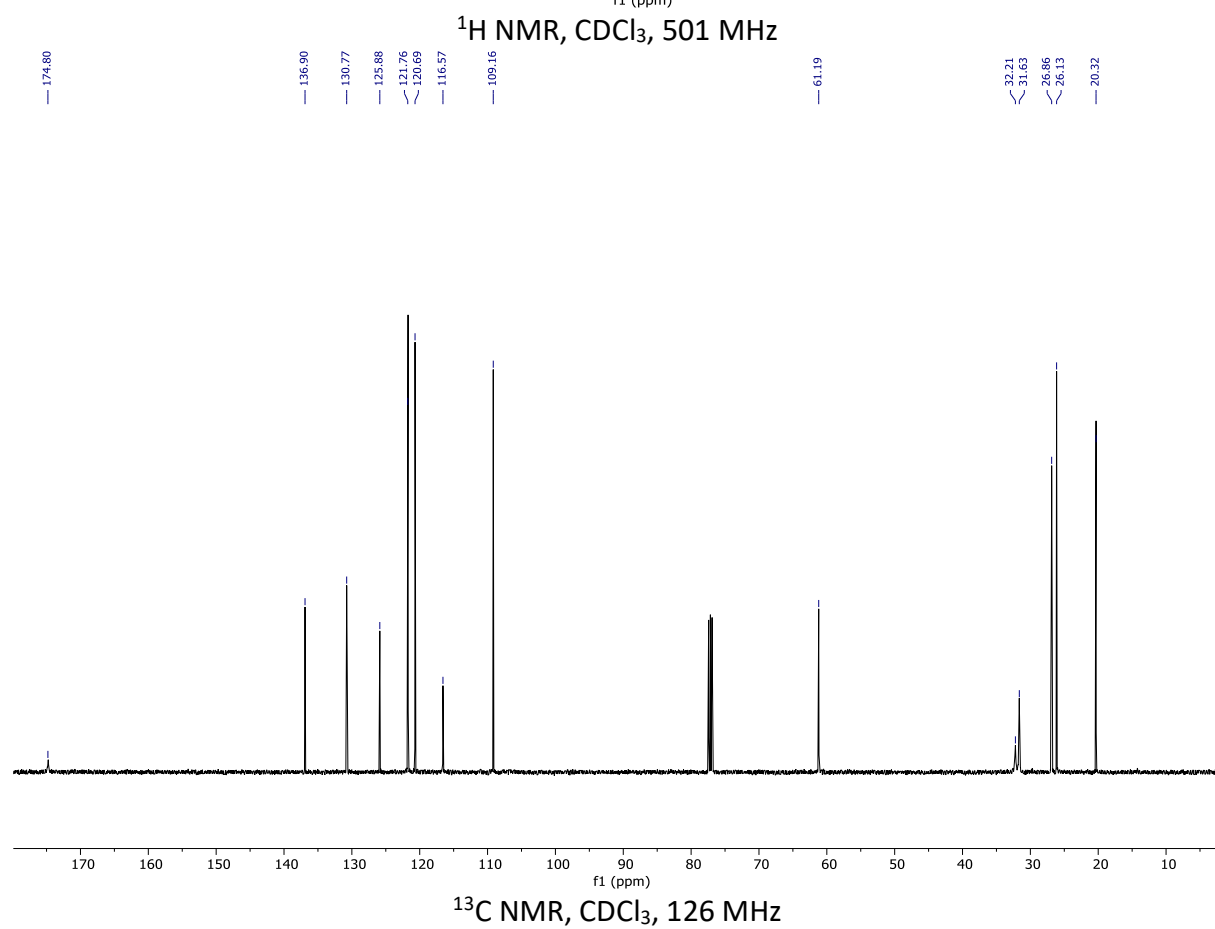

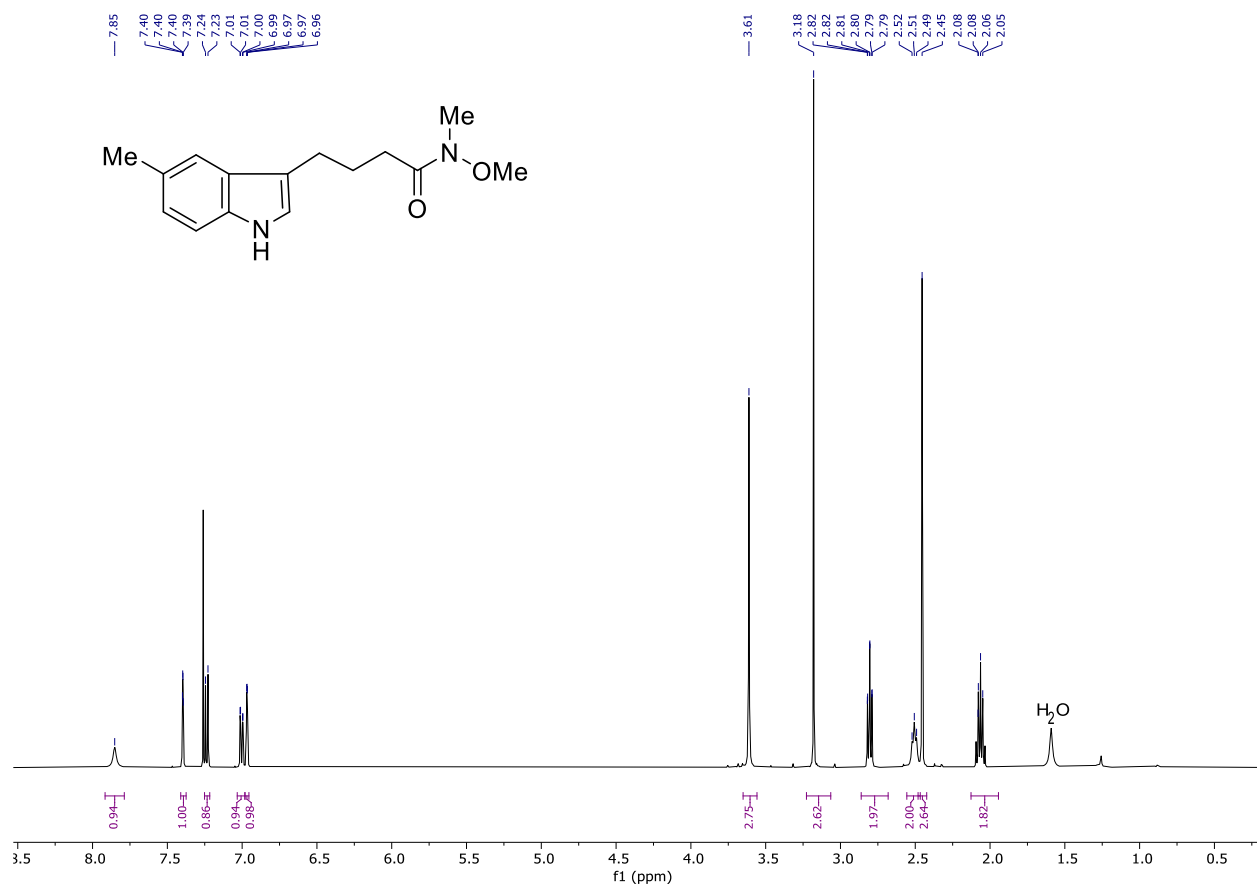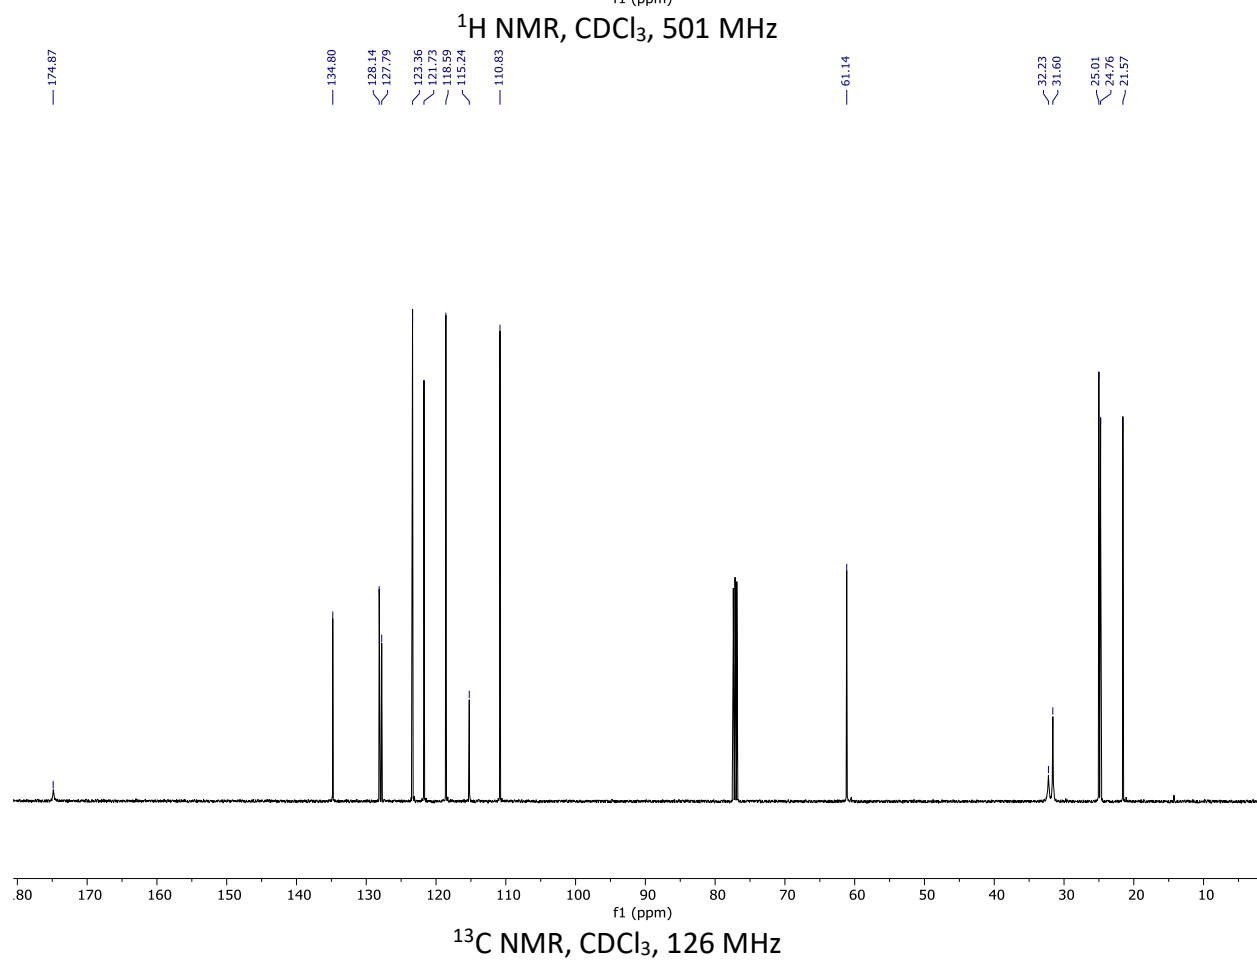

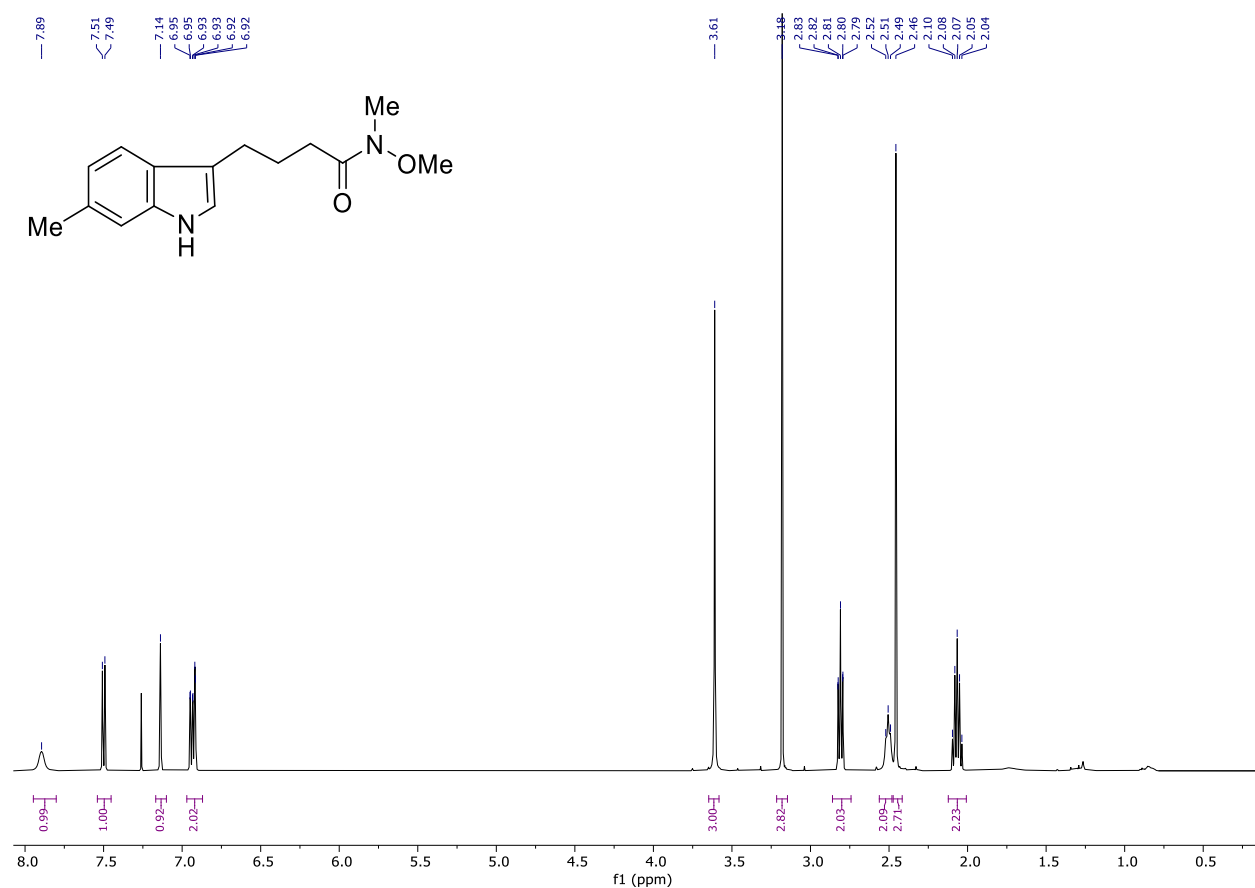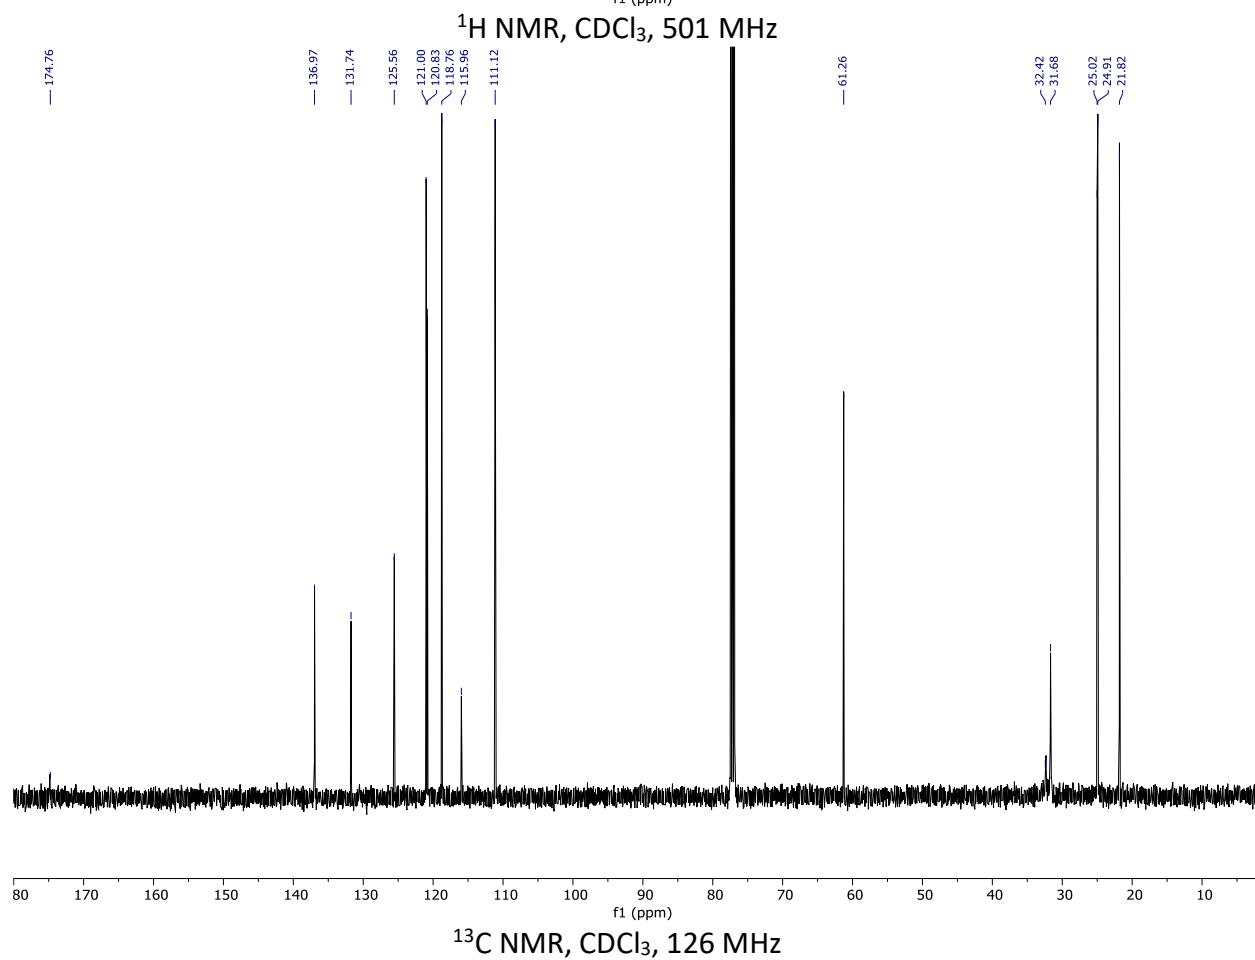

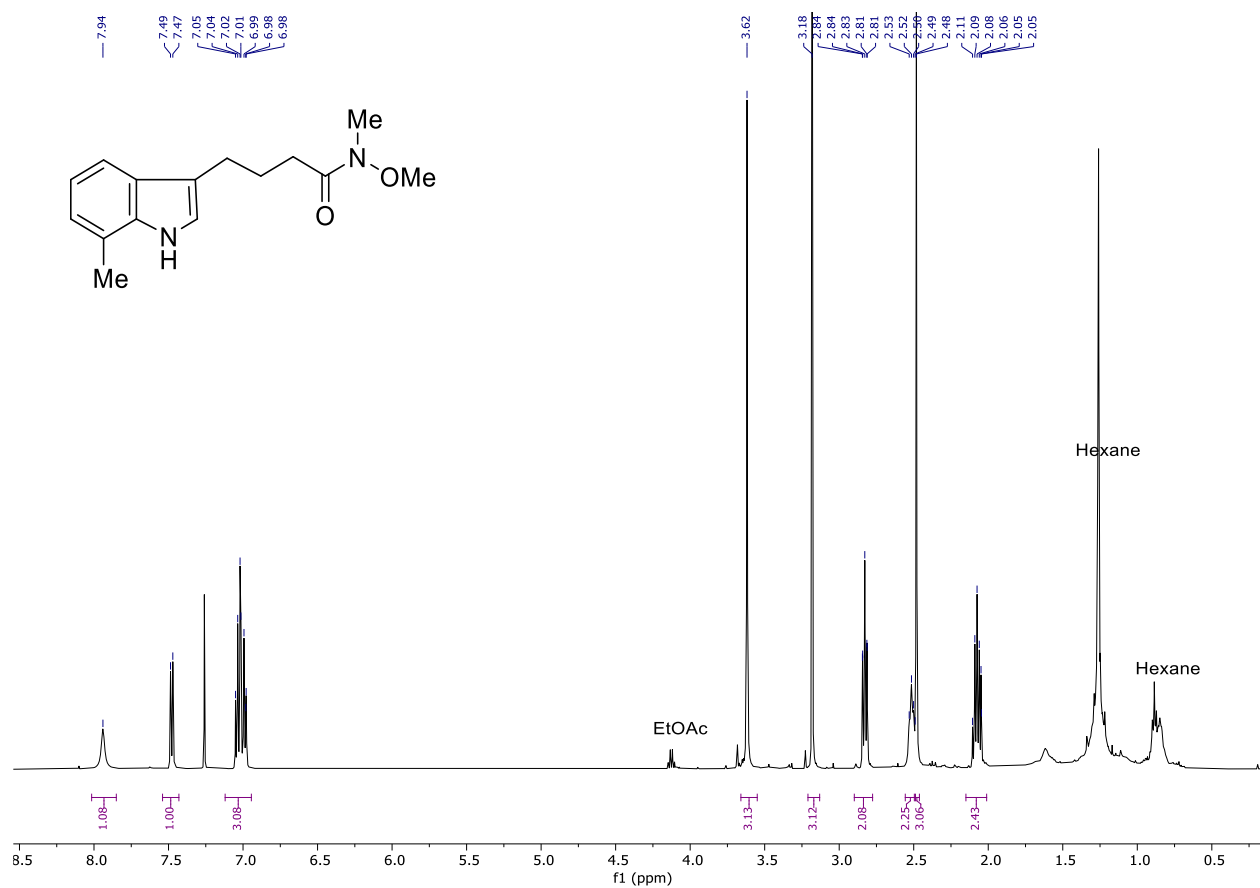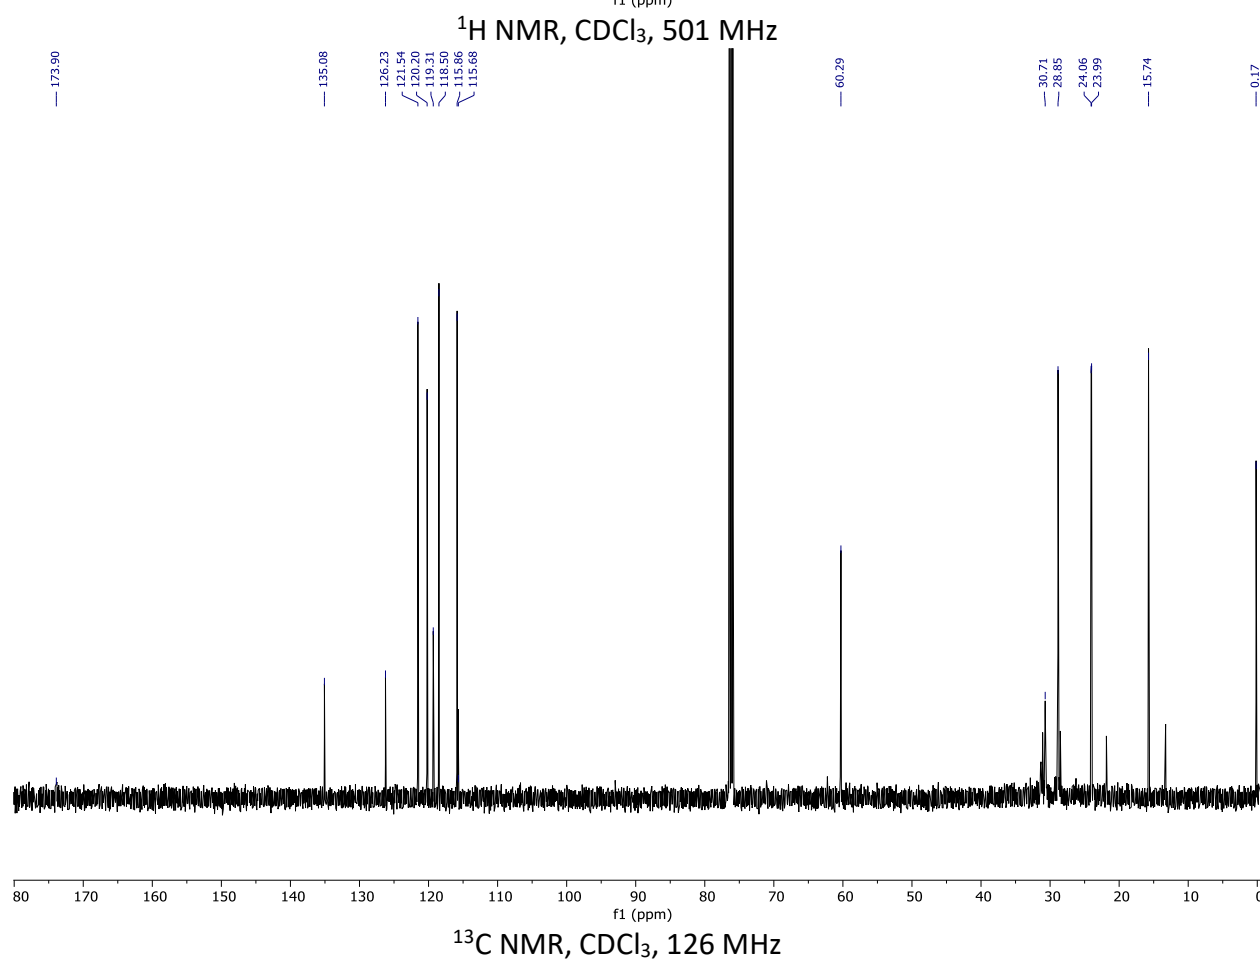

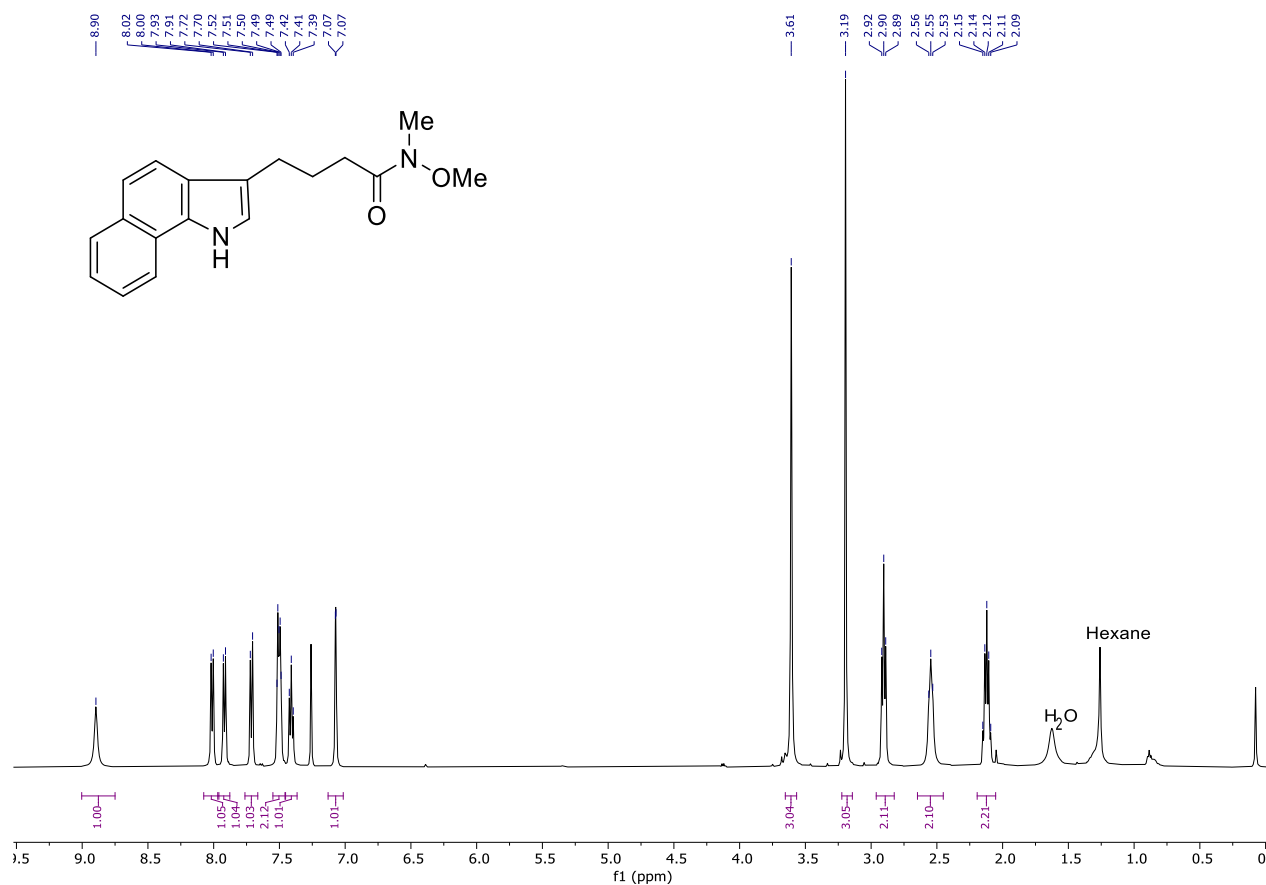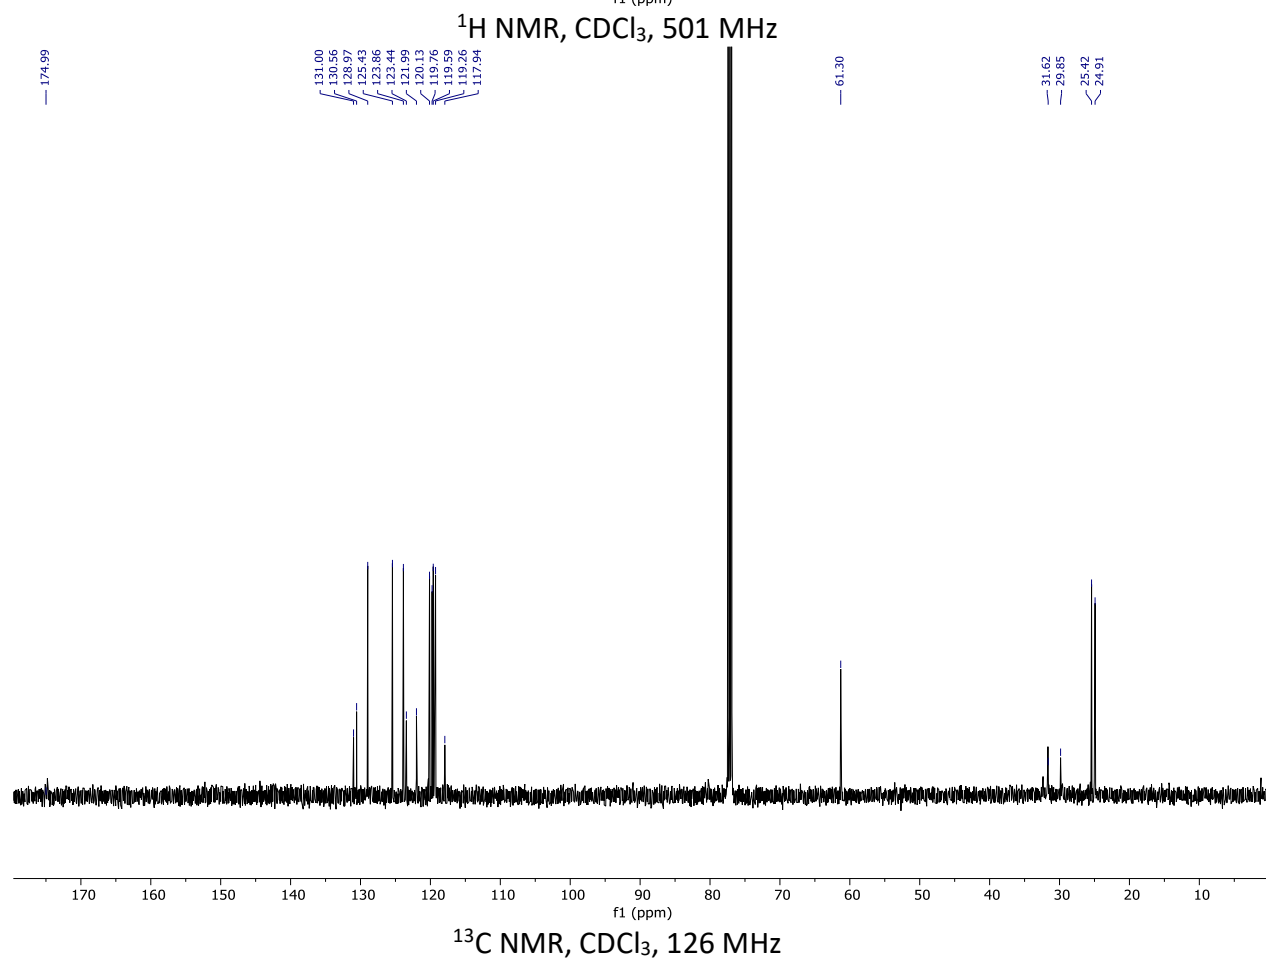

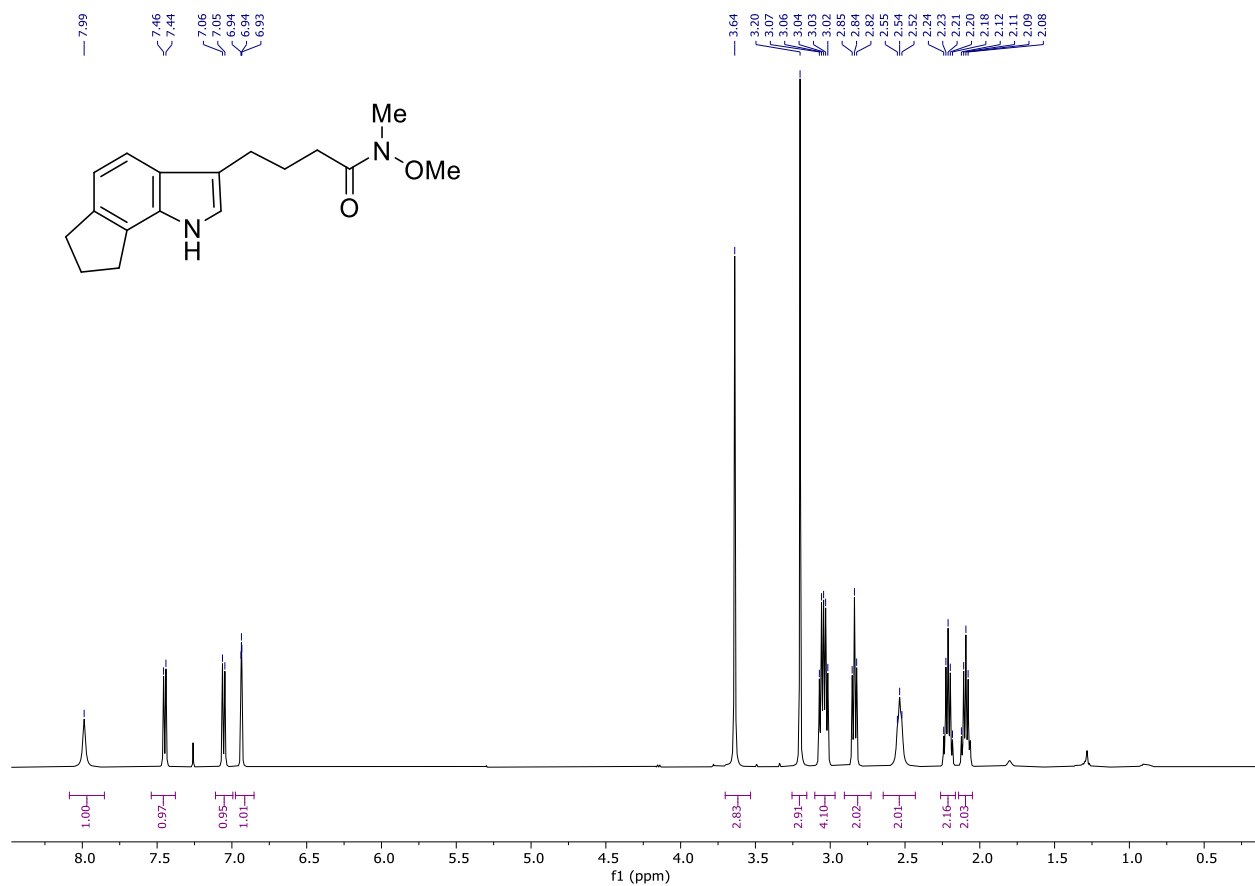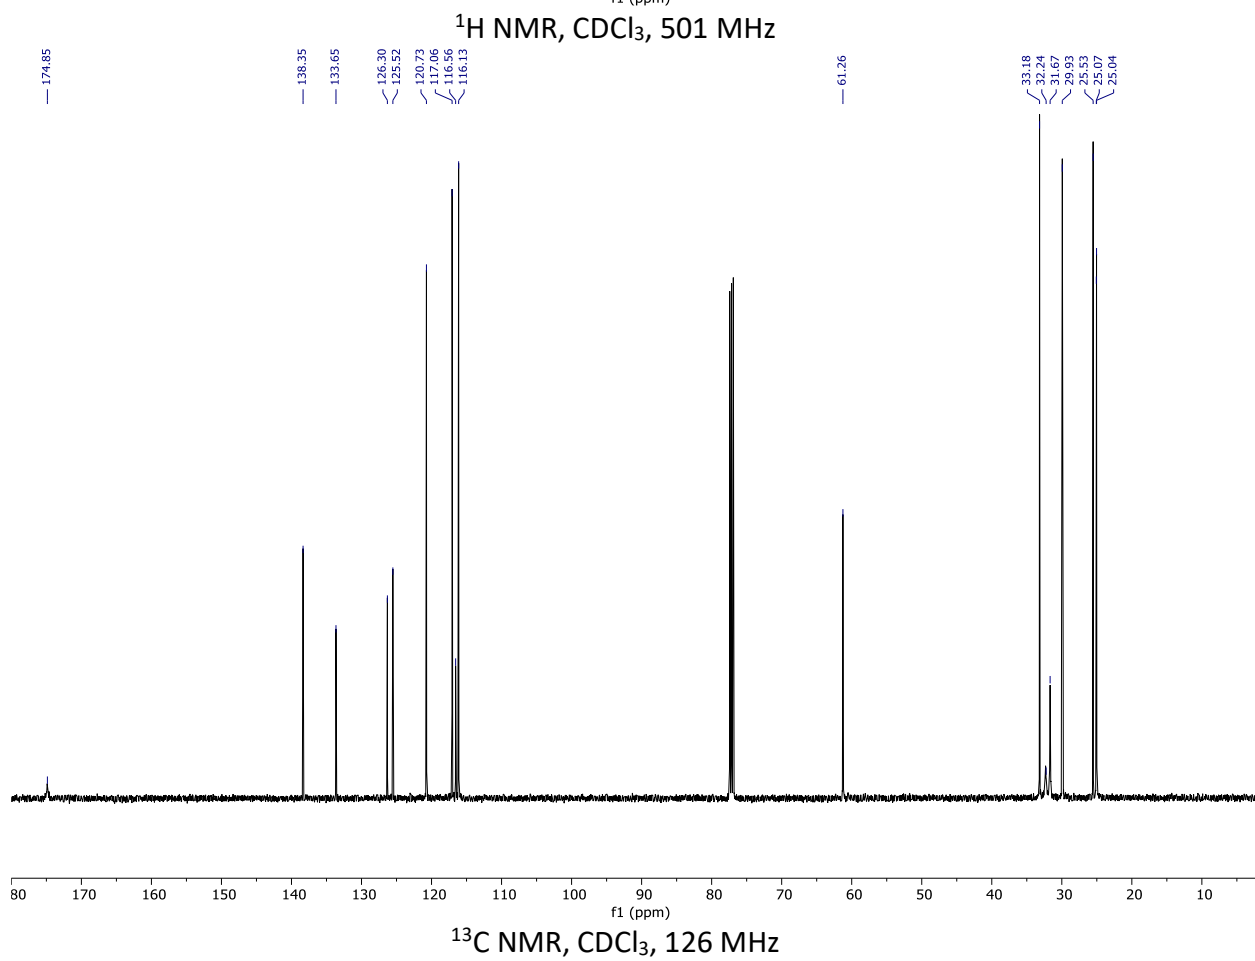

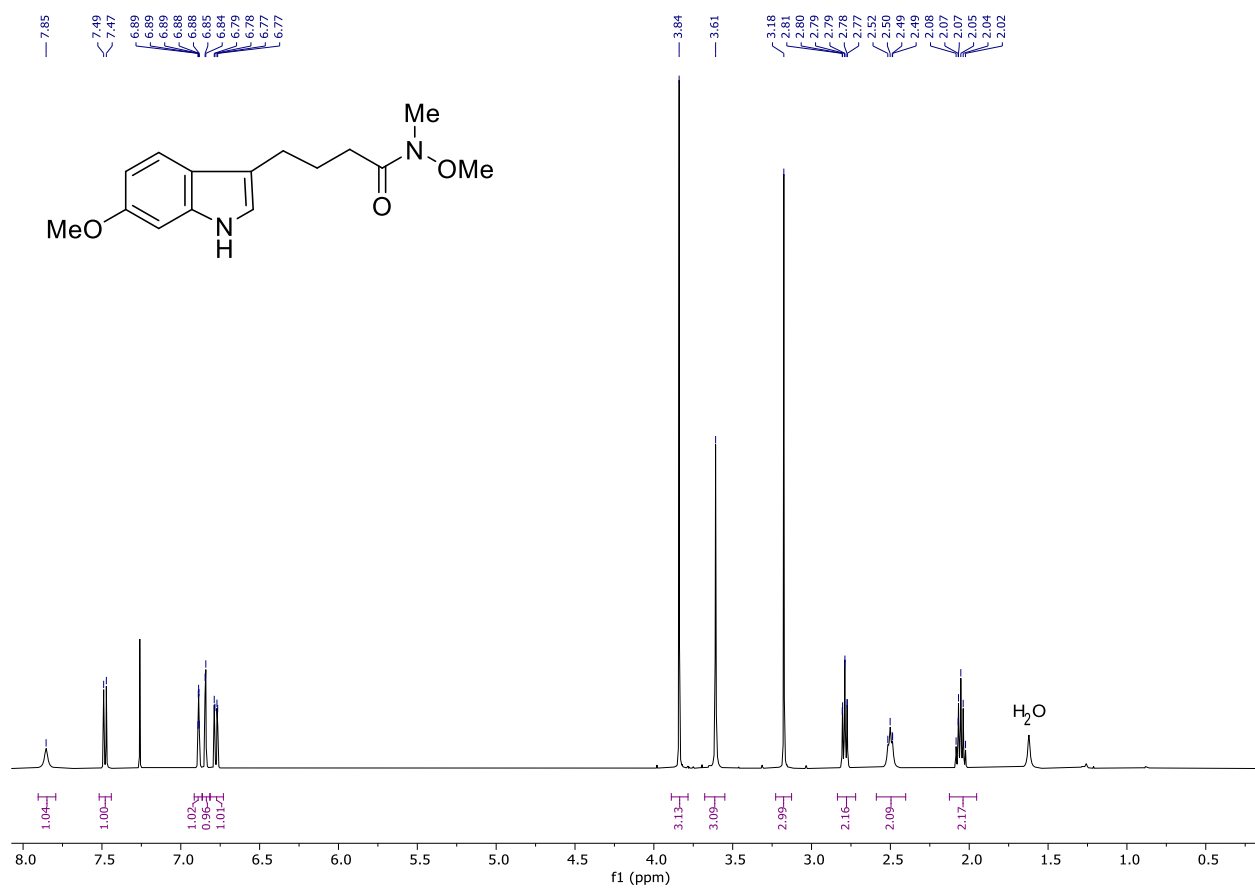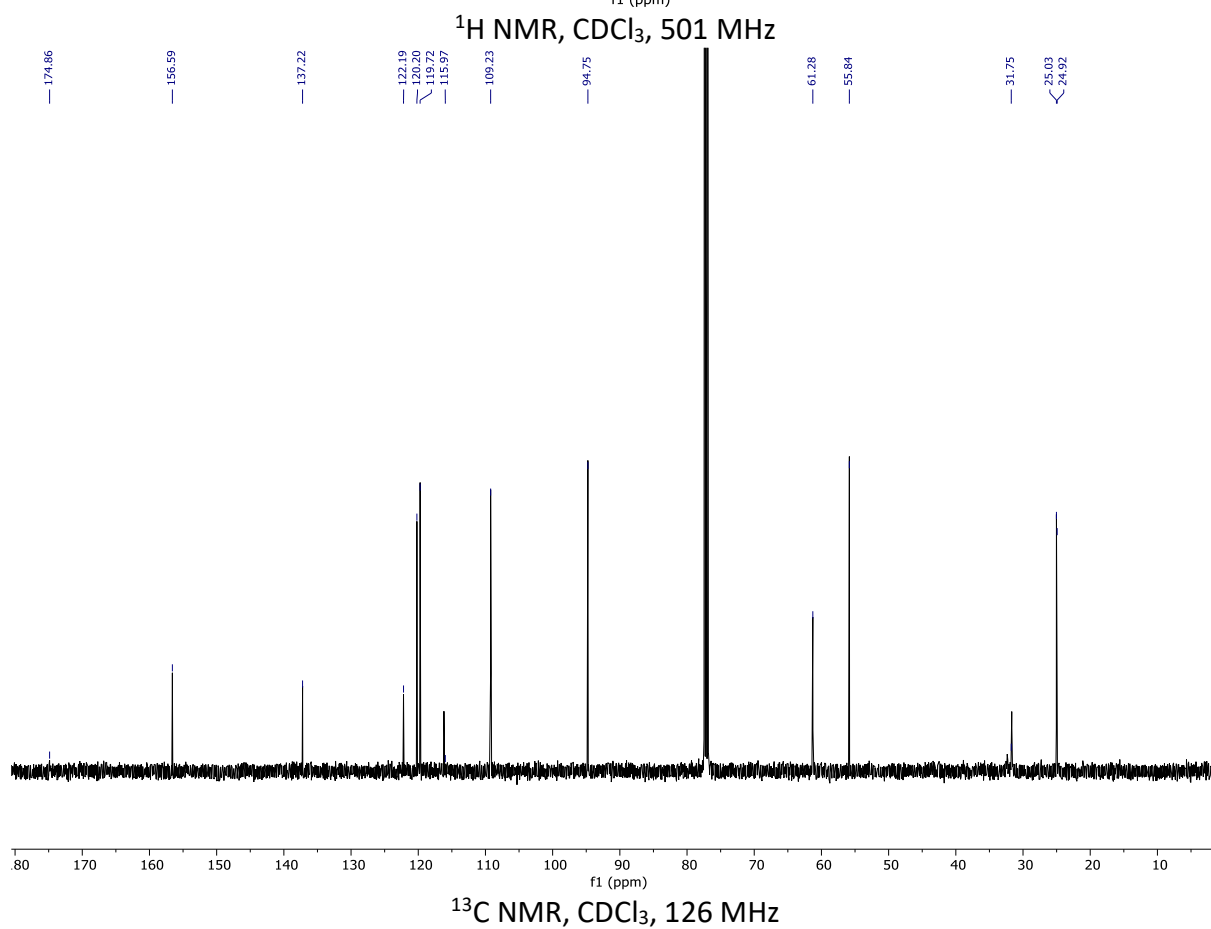

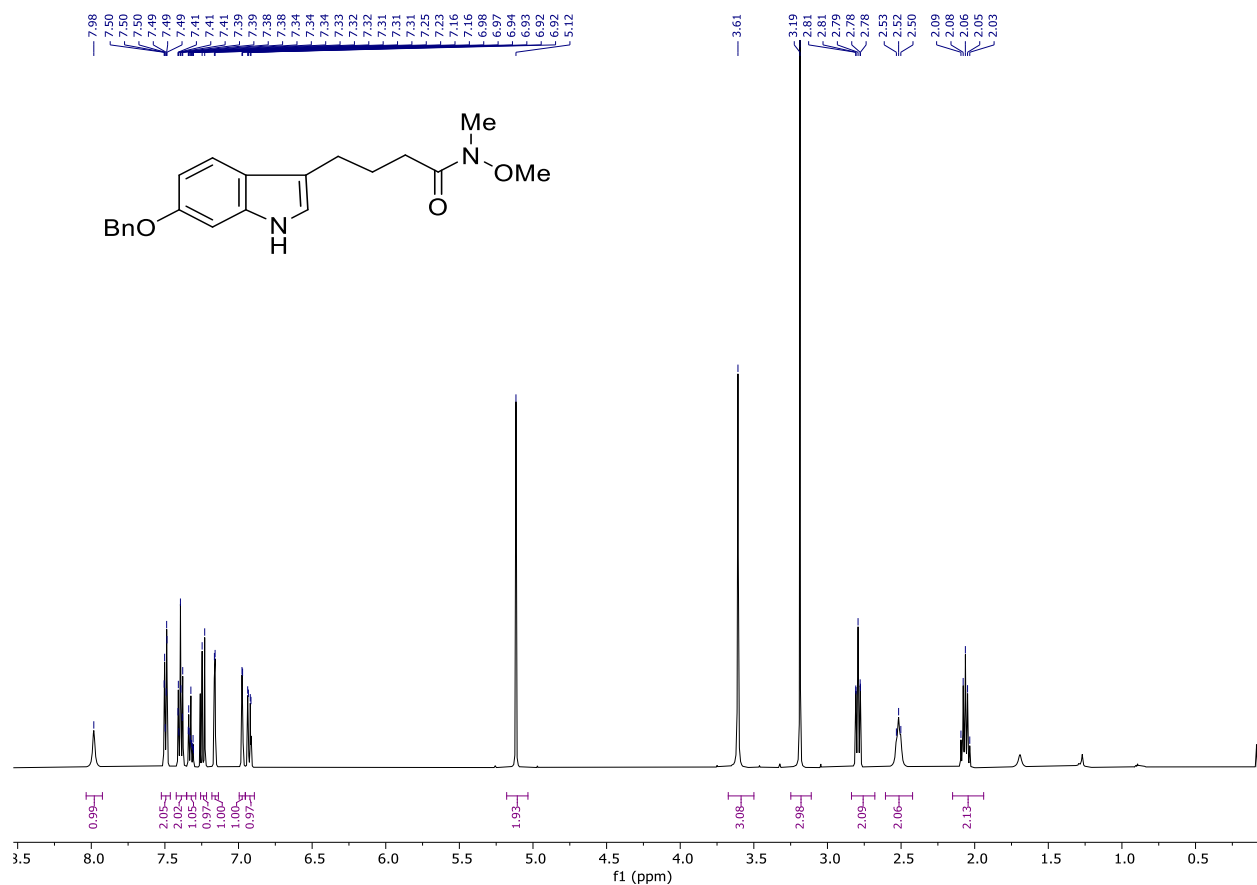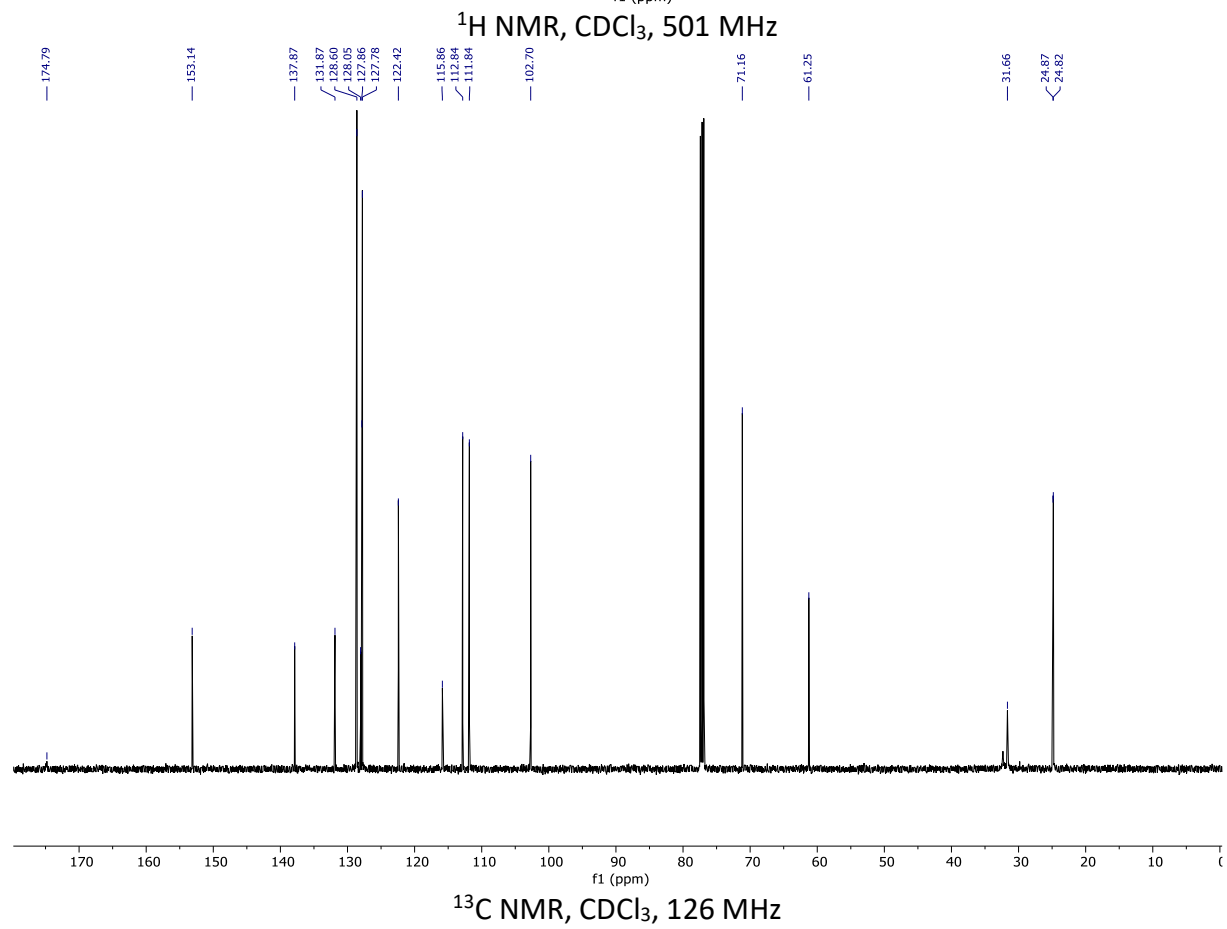

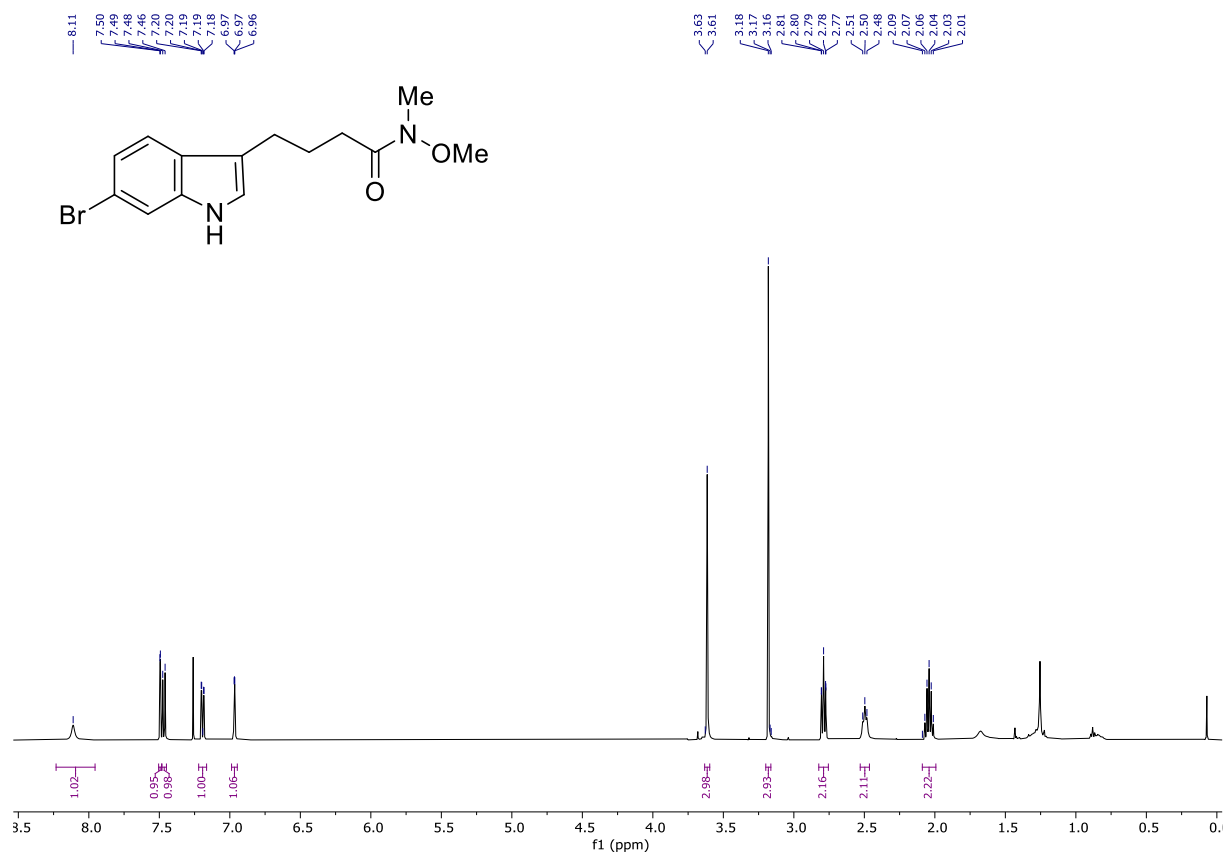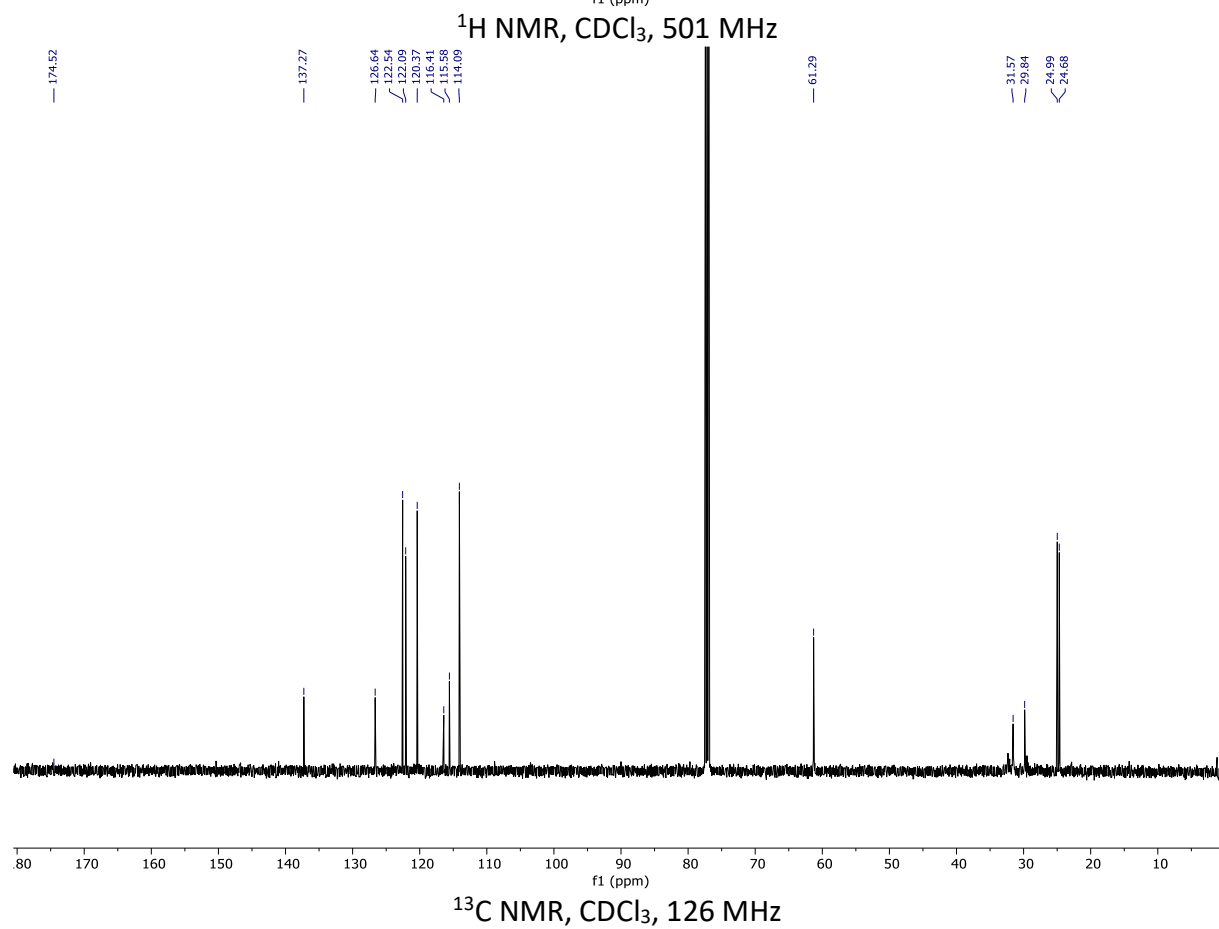

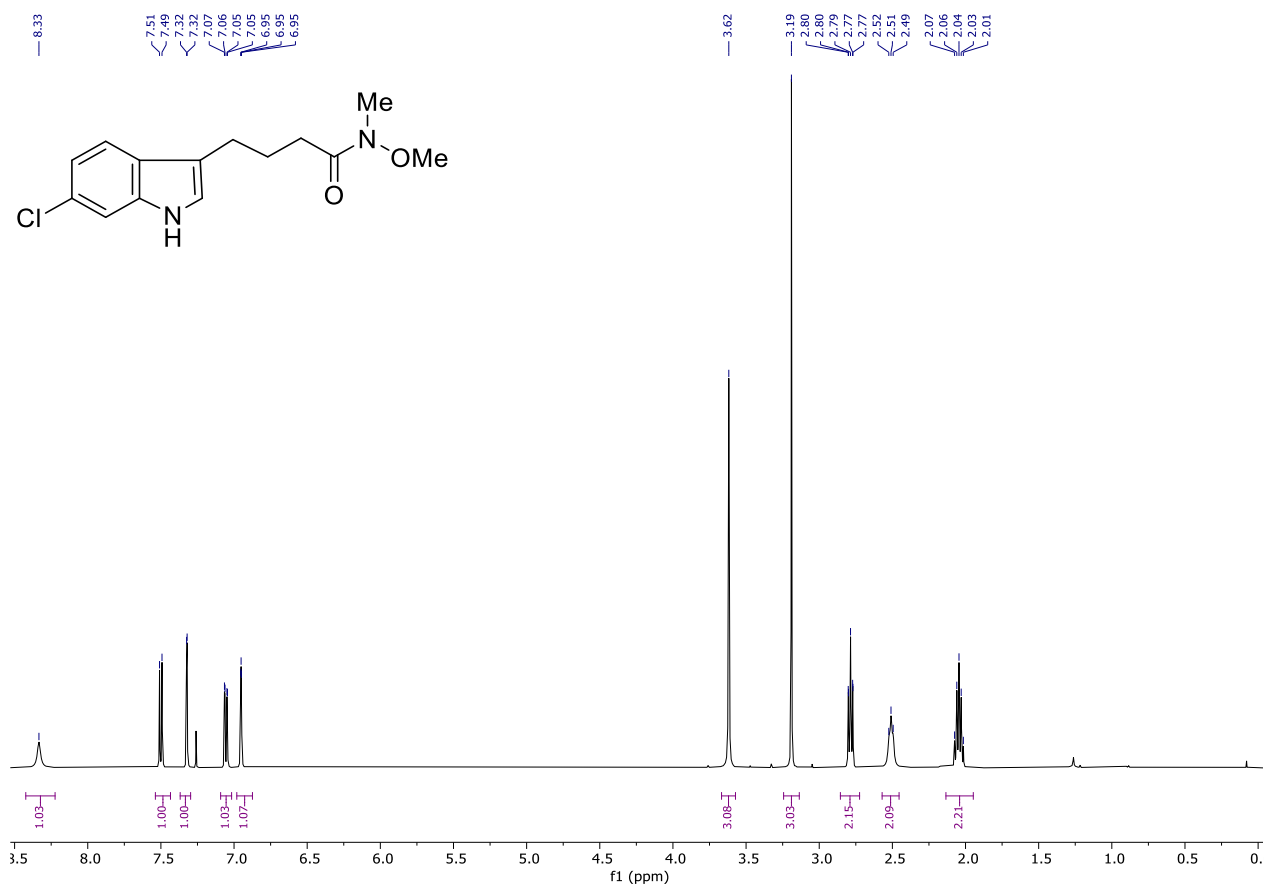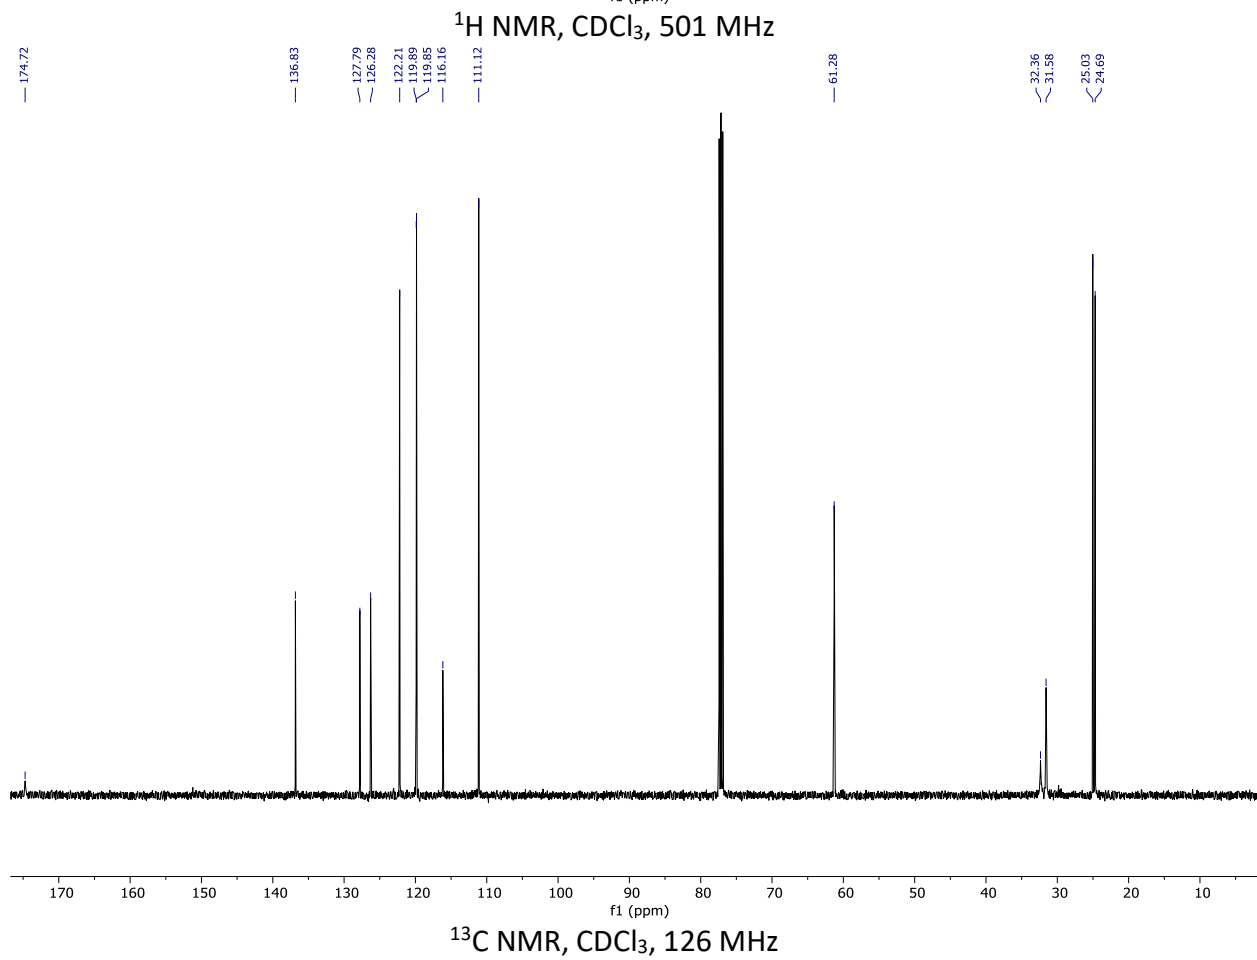

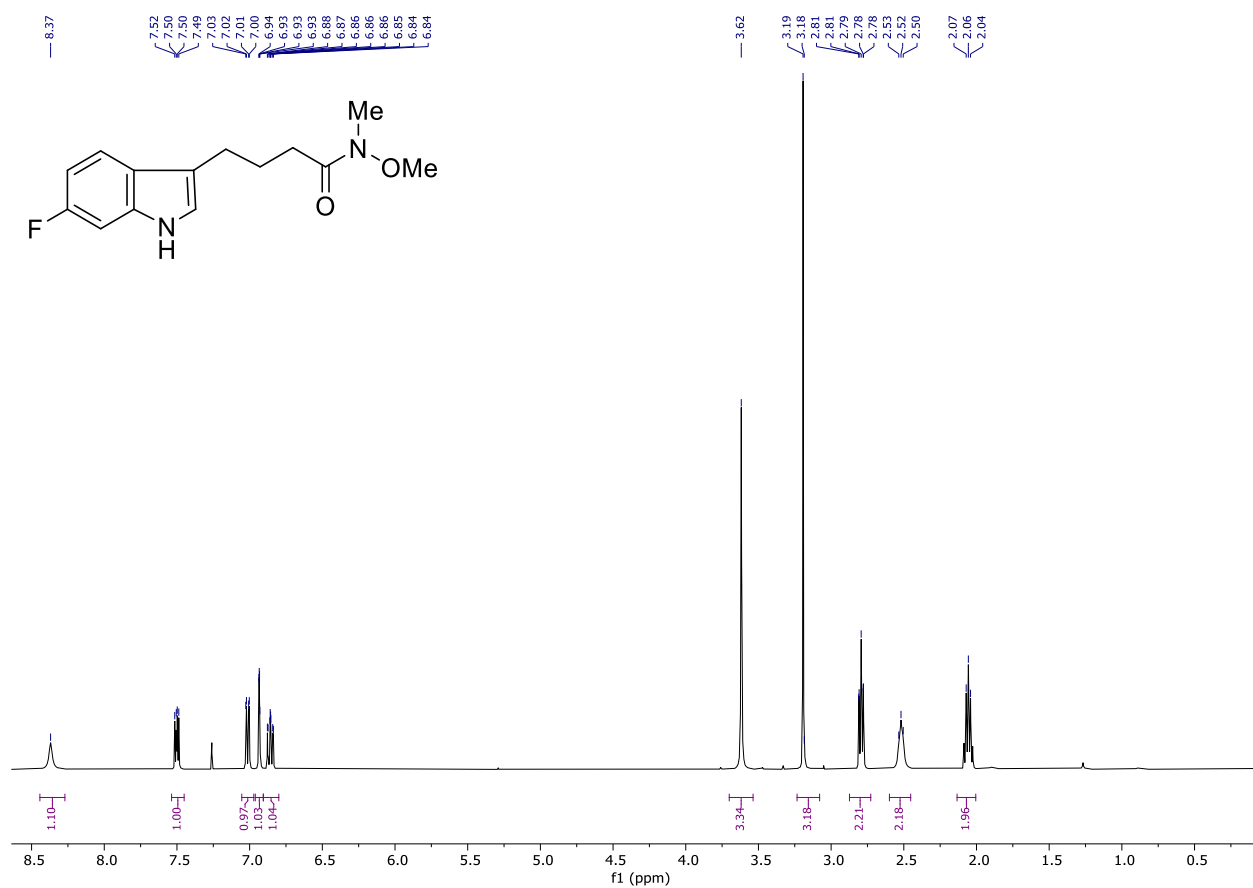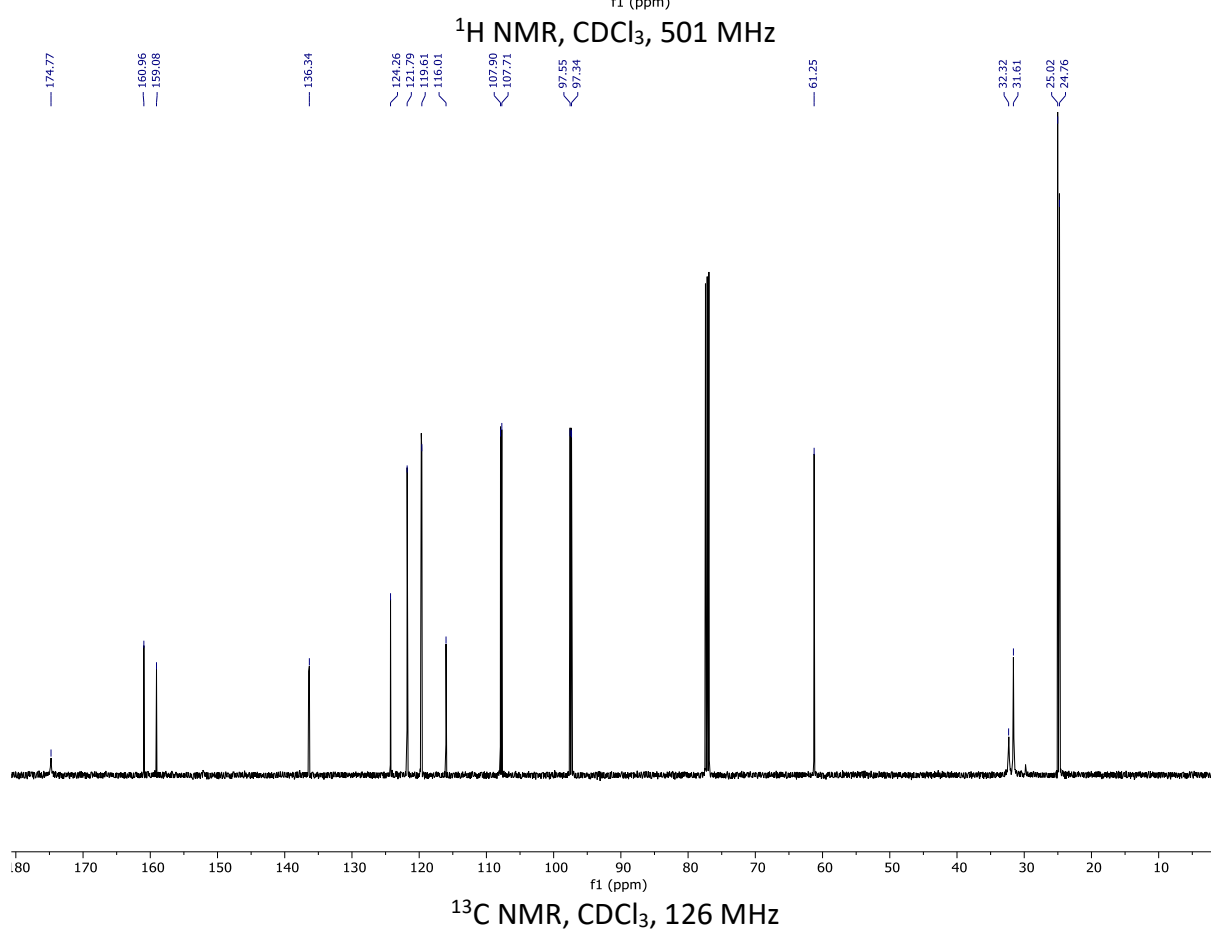

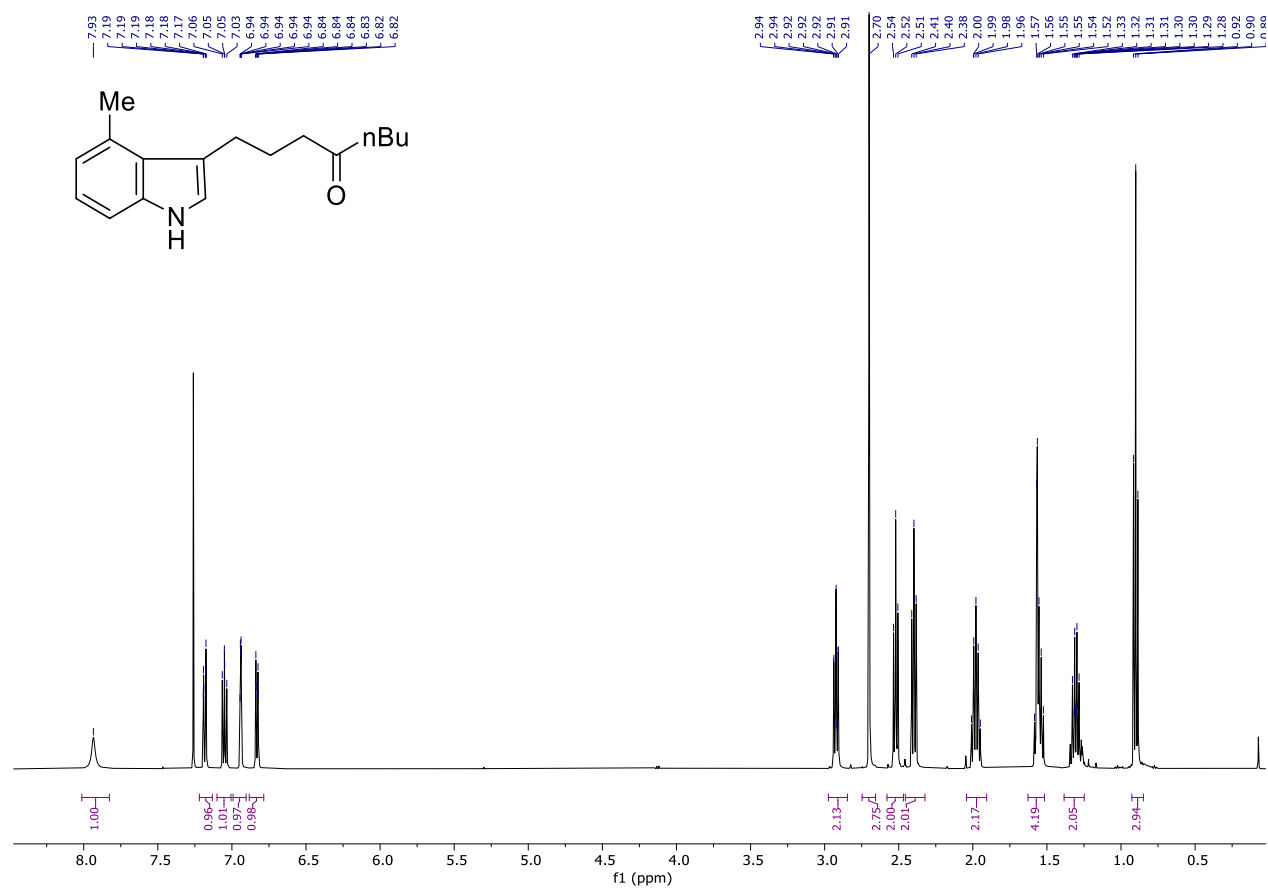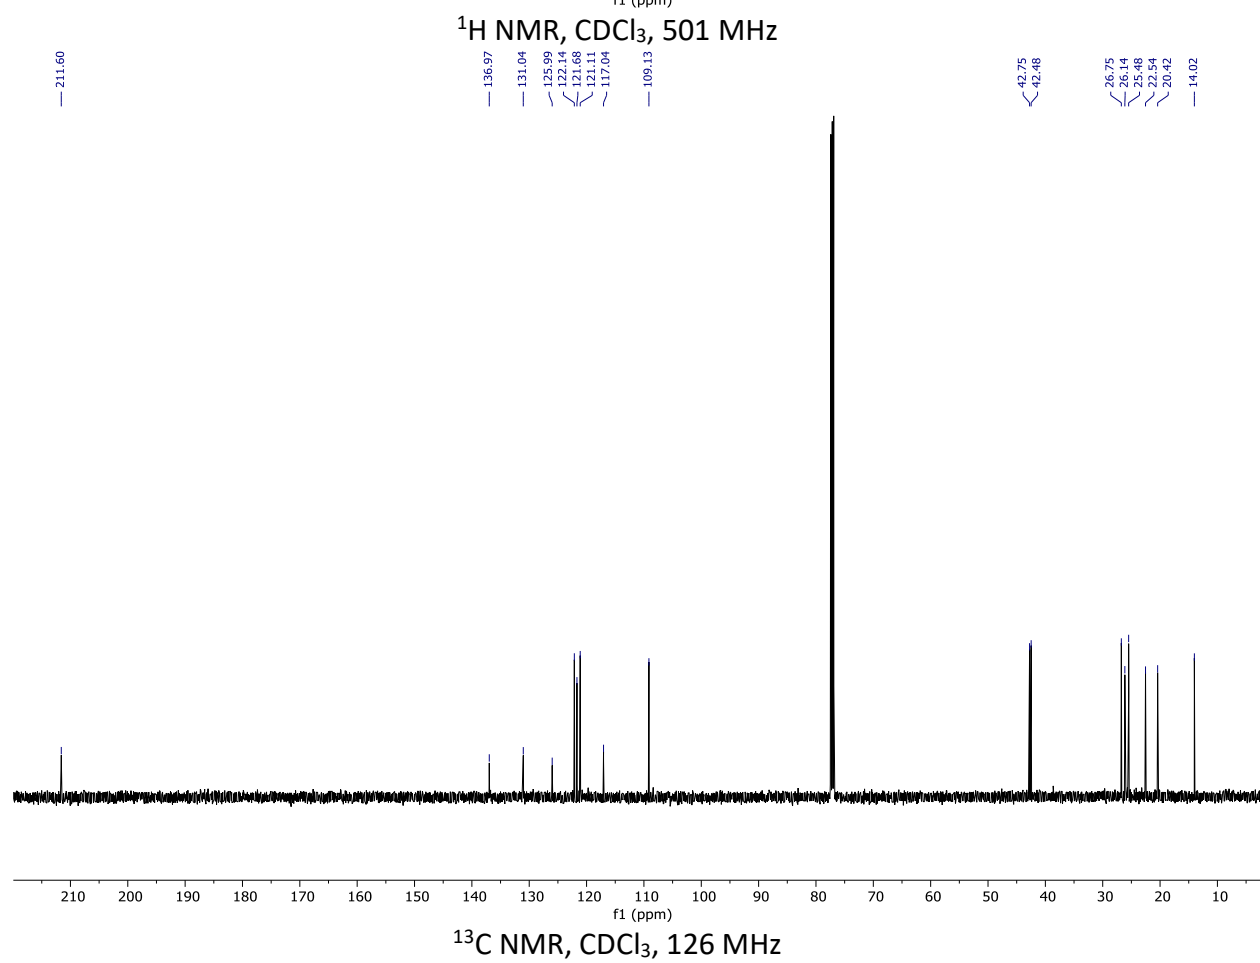

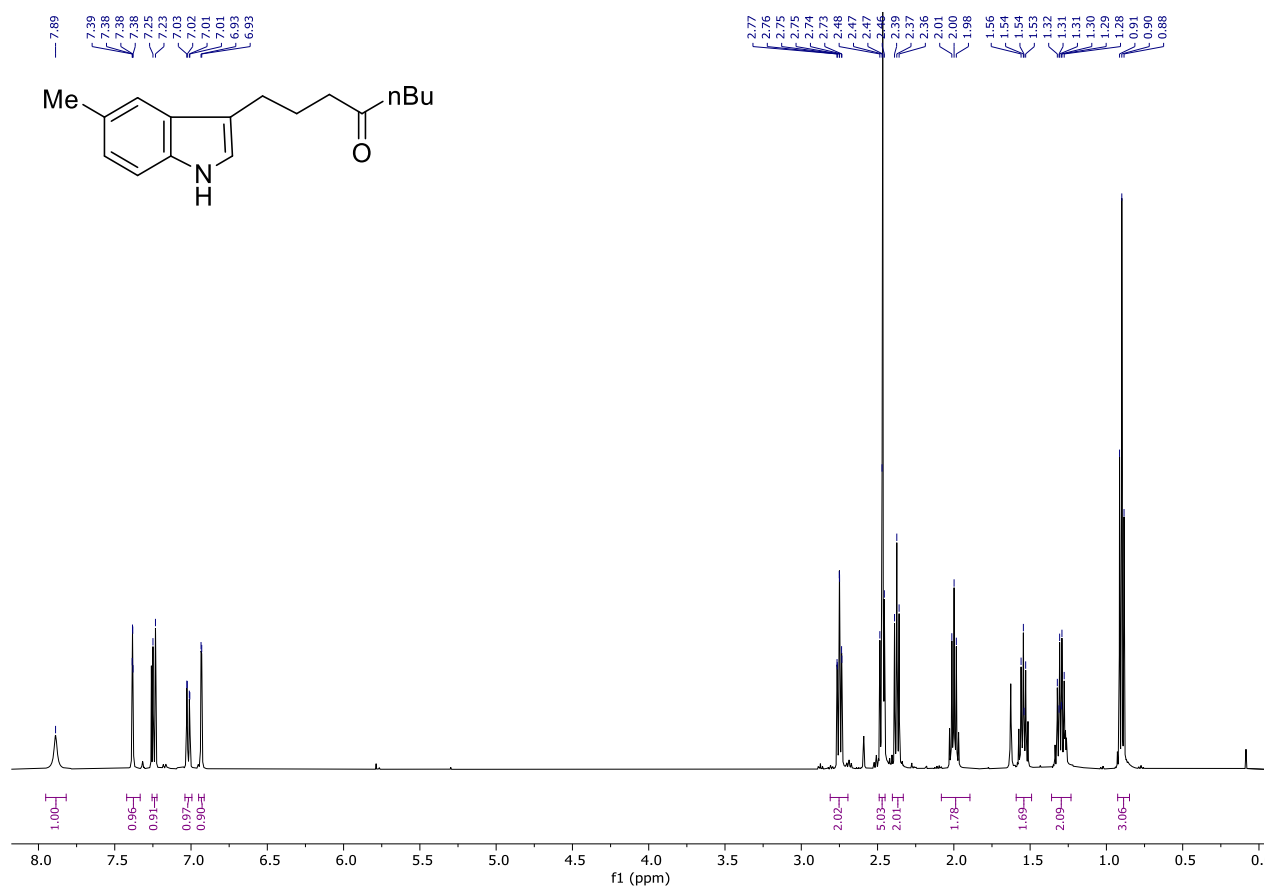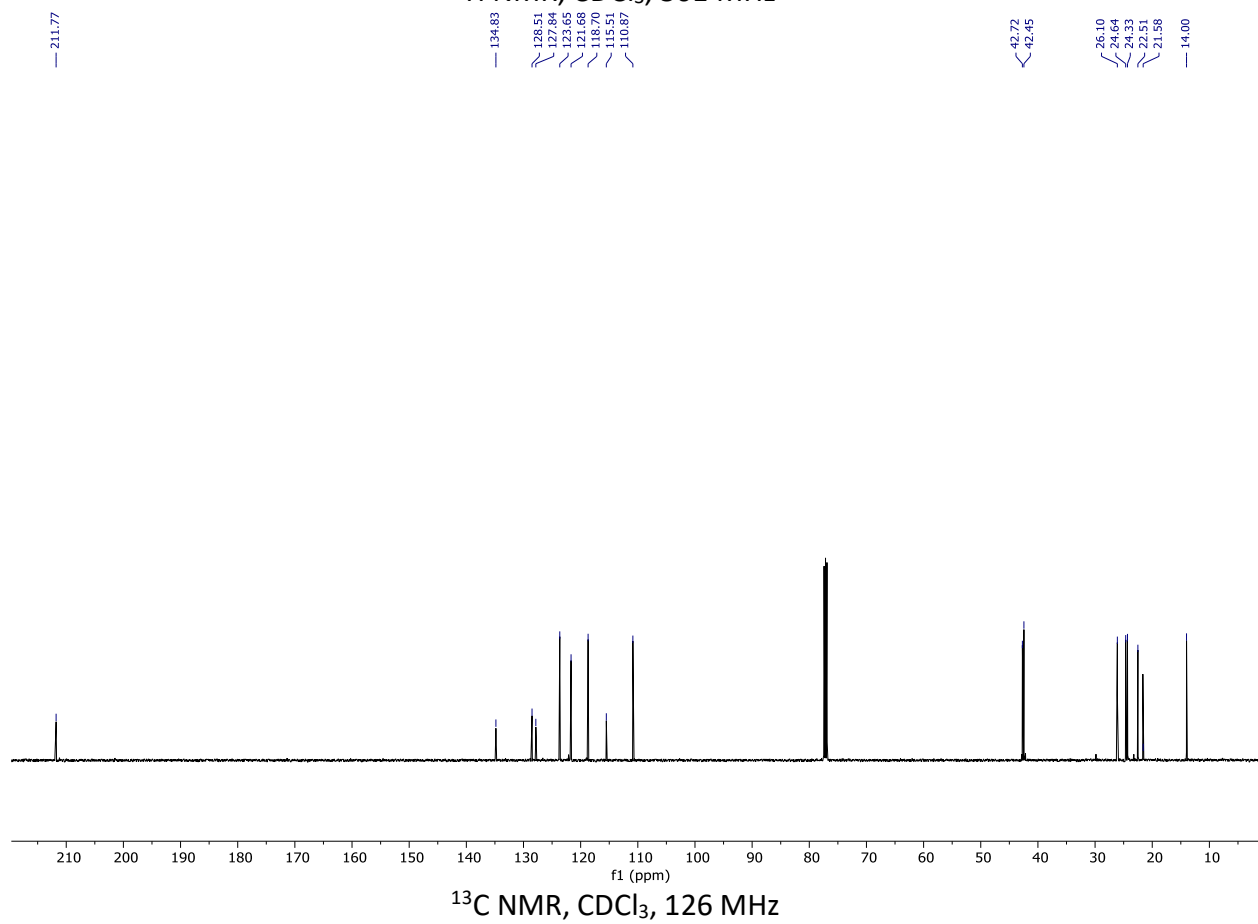

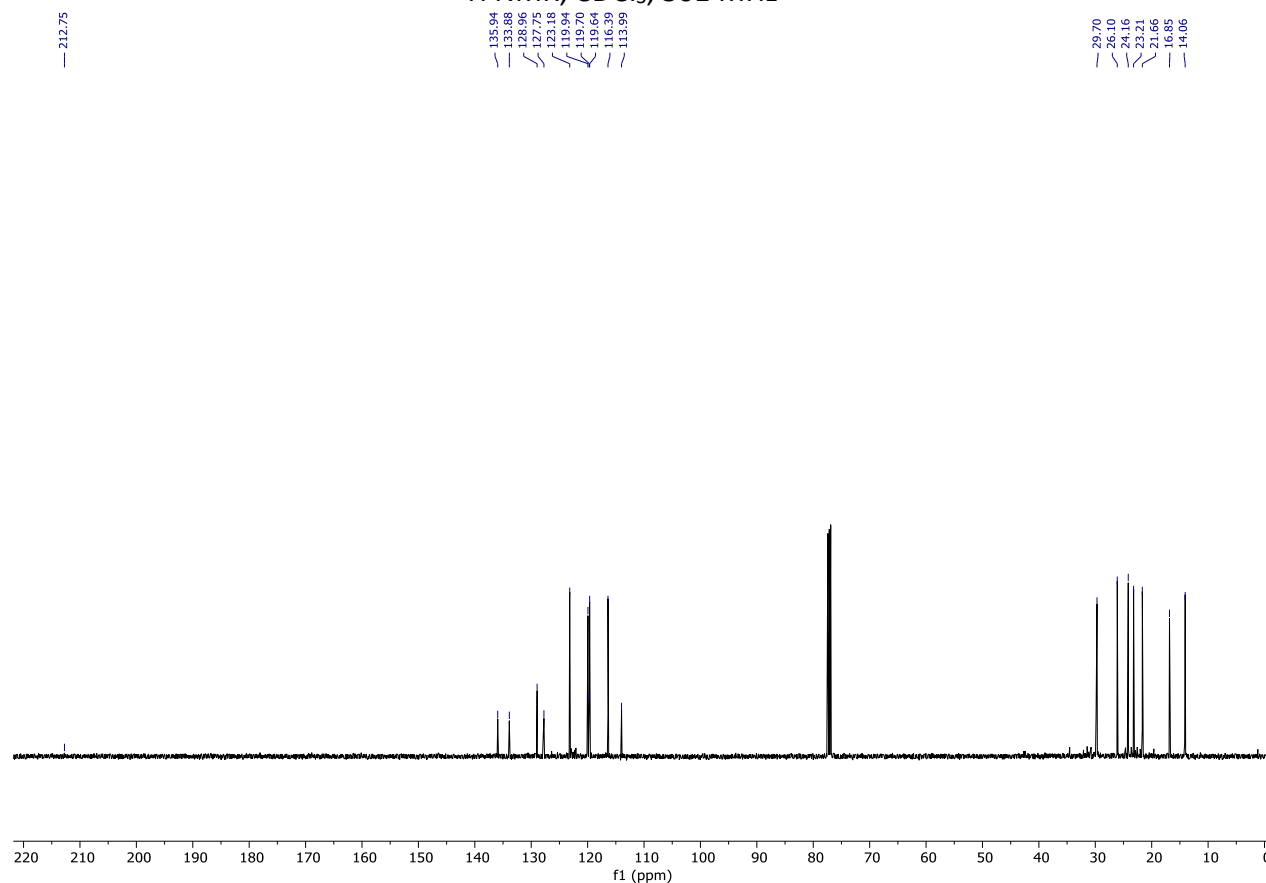

S162

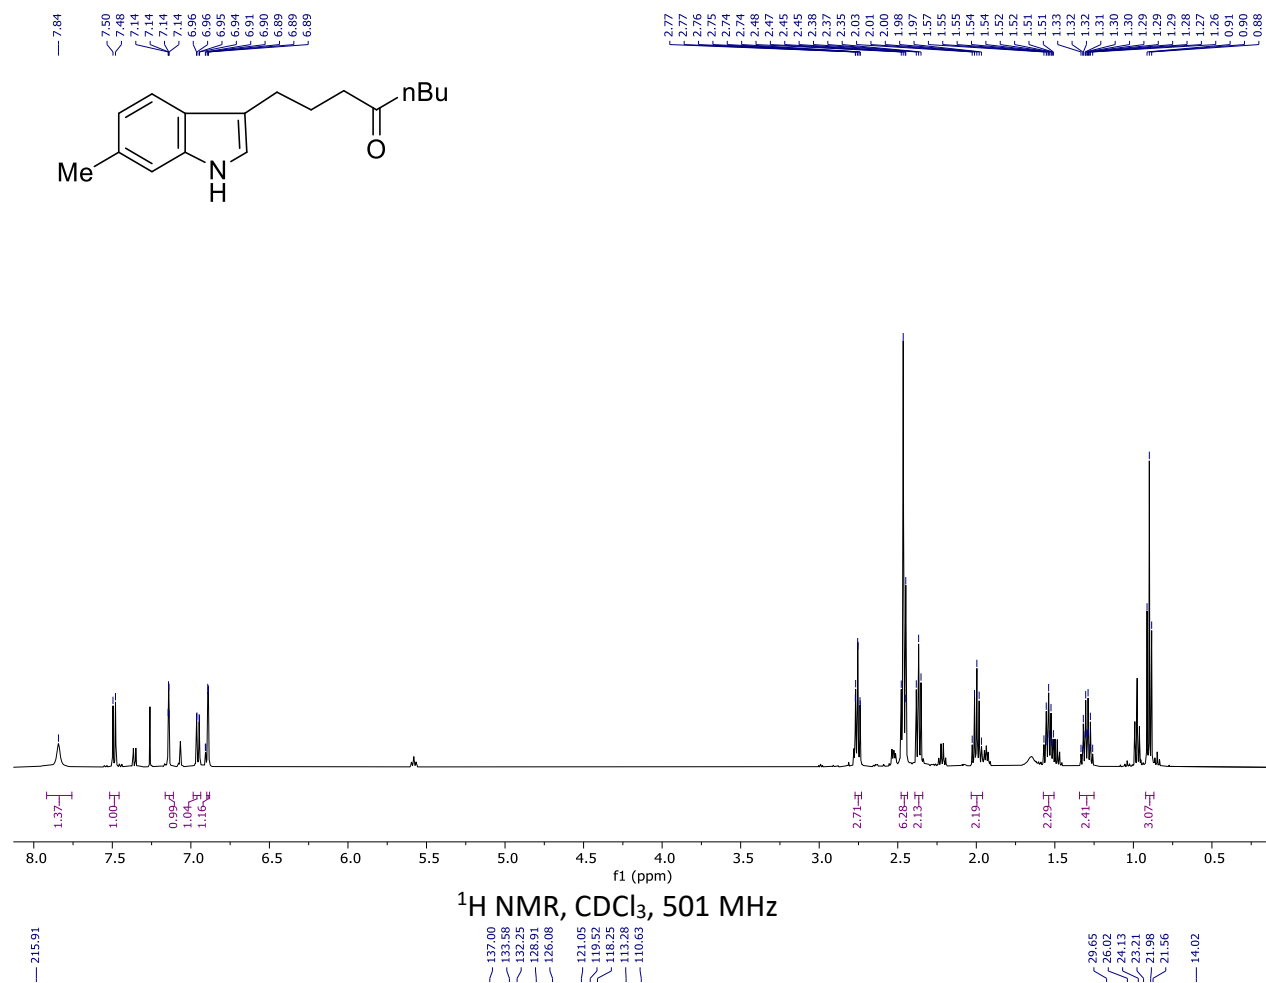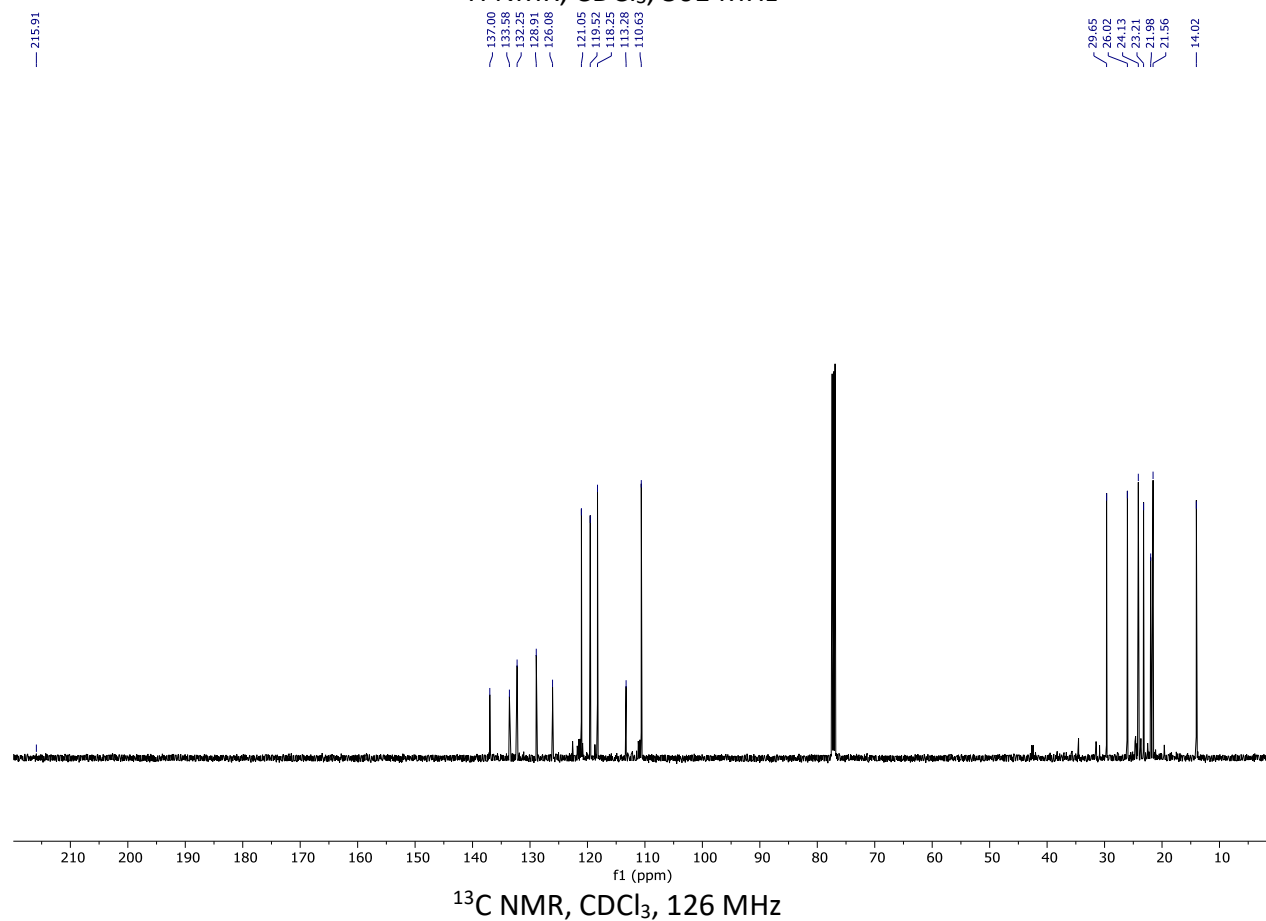

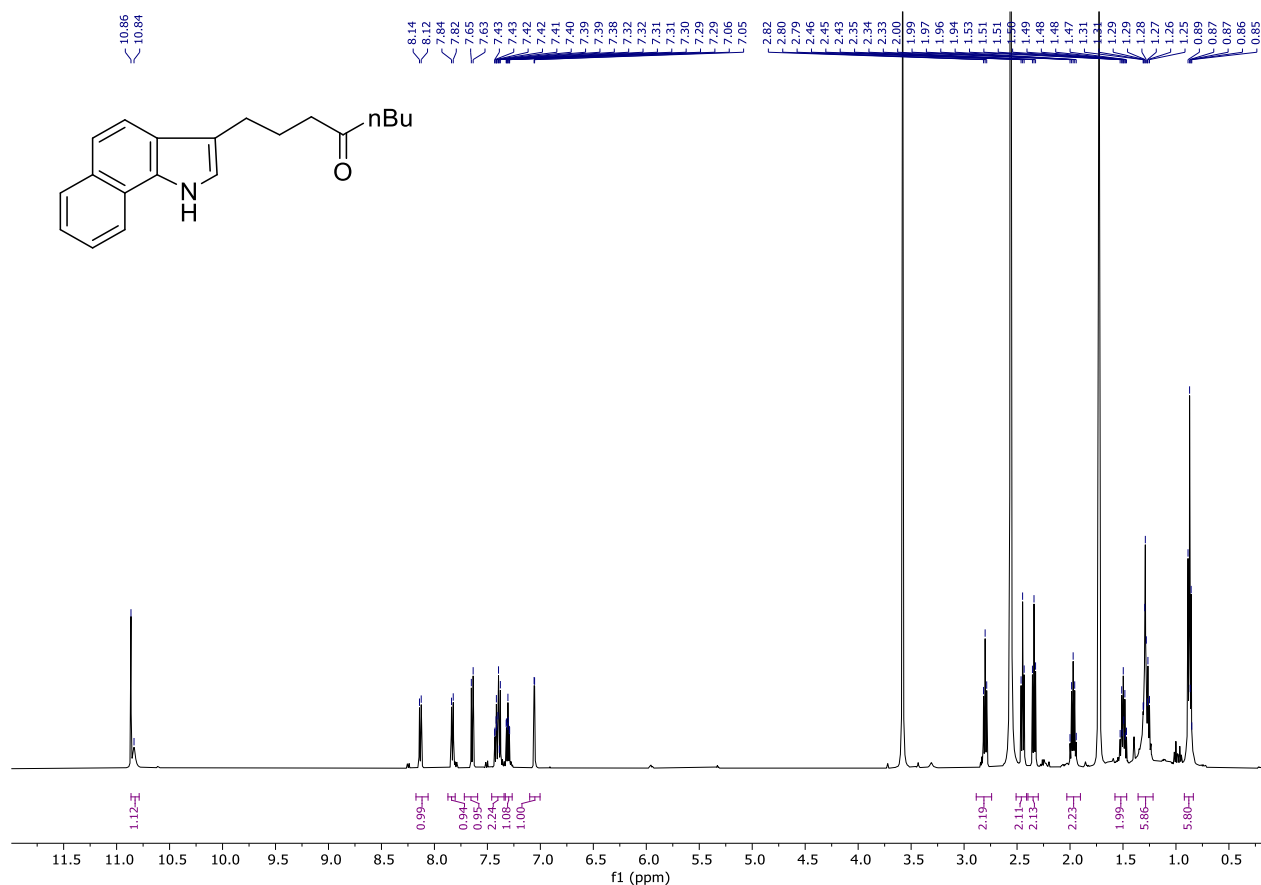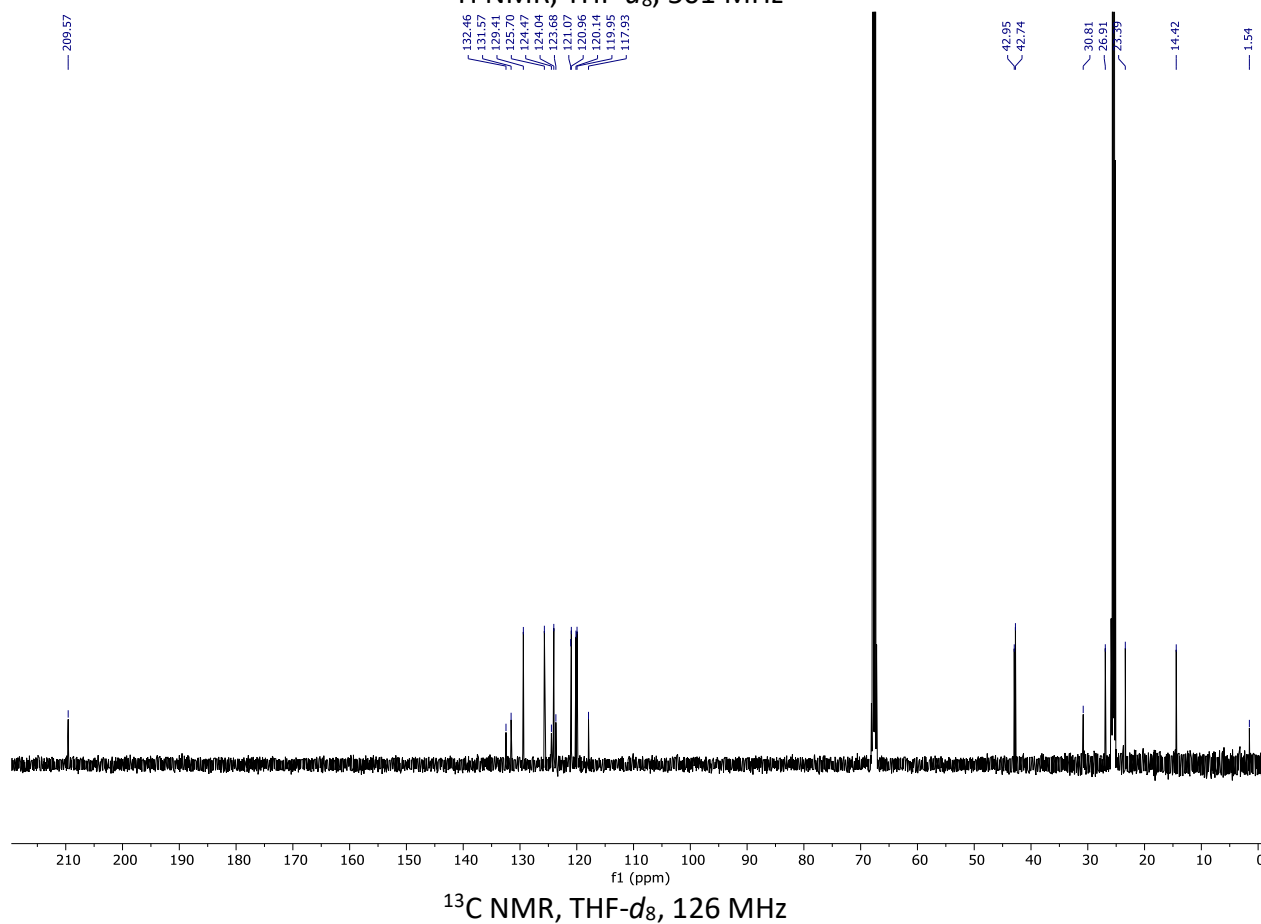

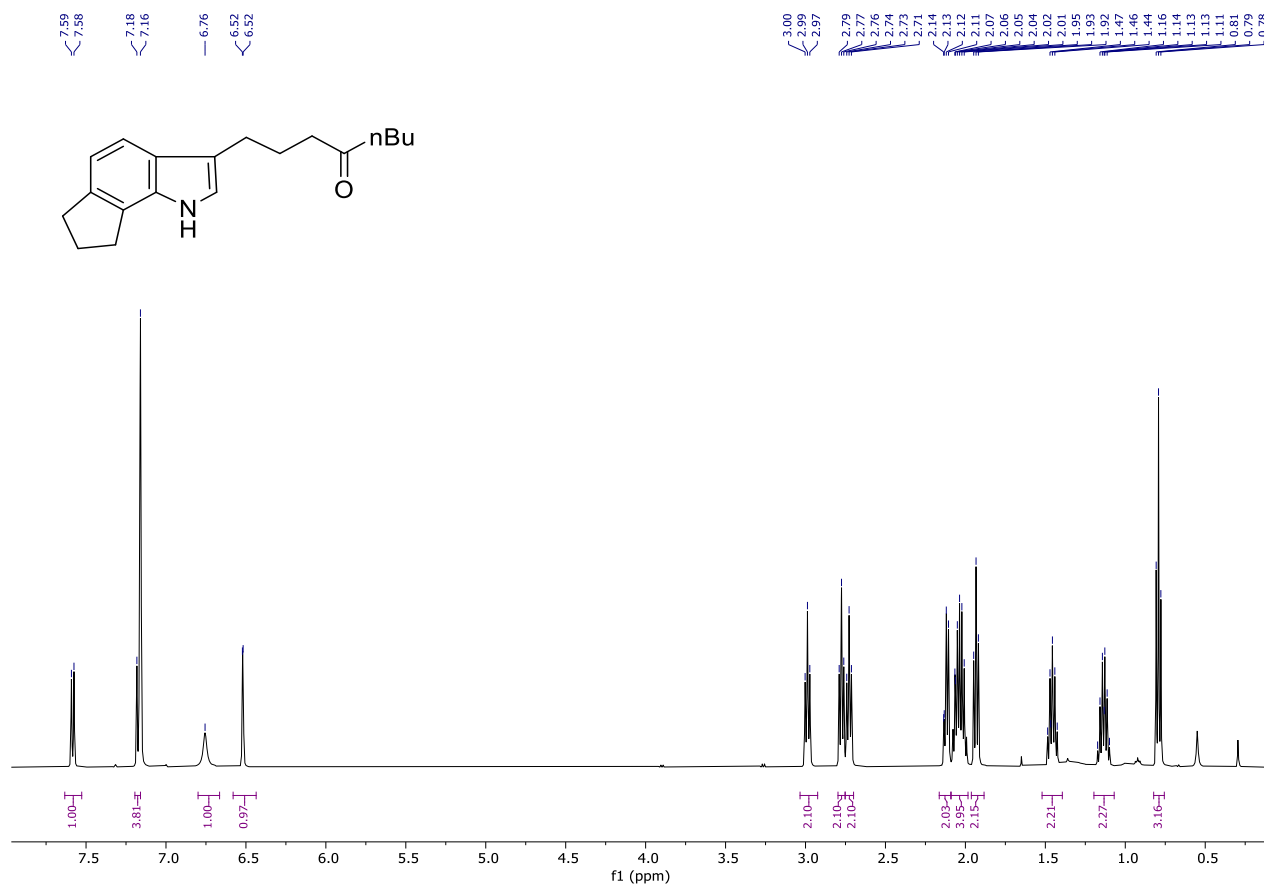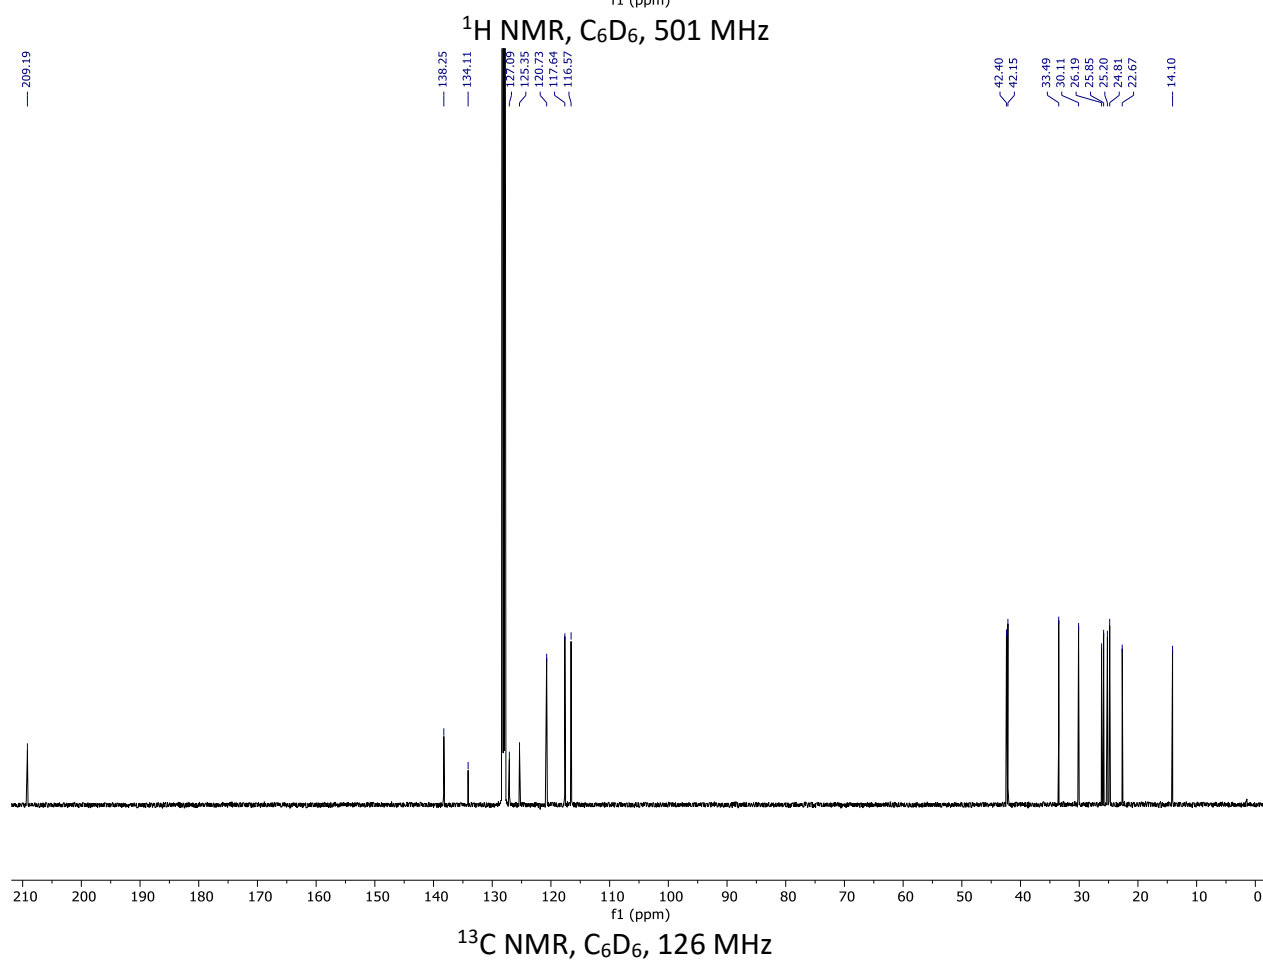

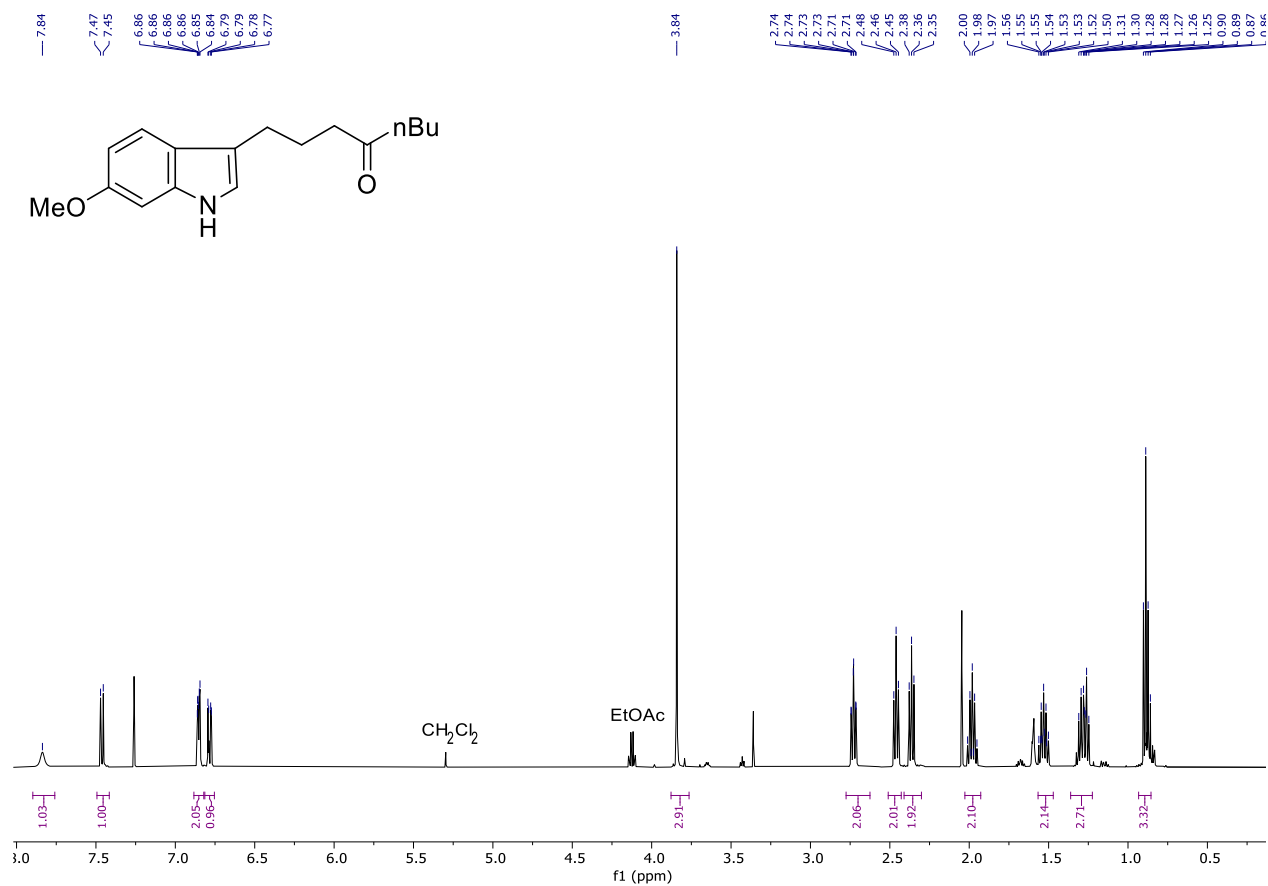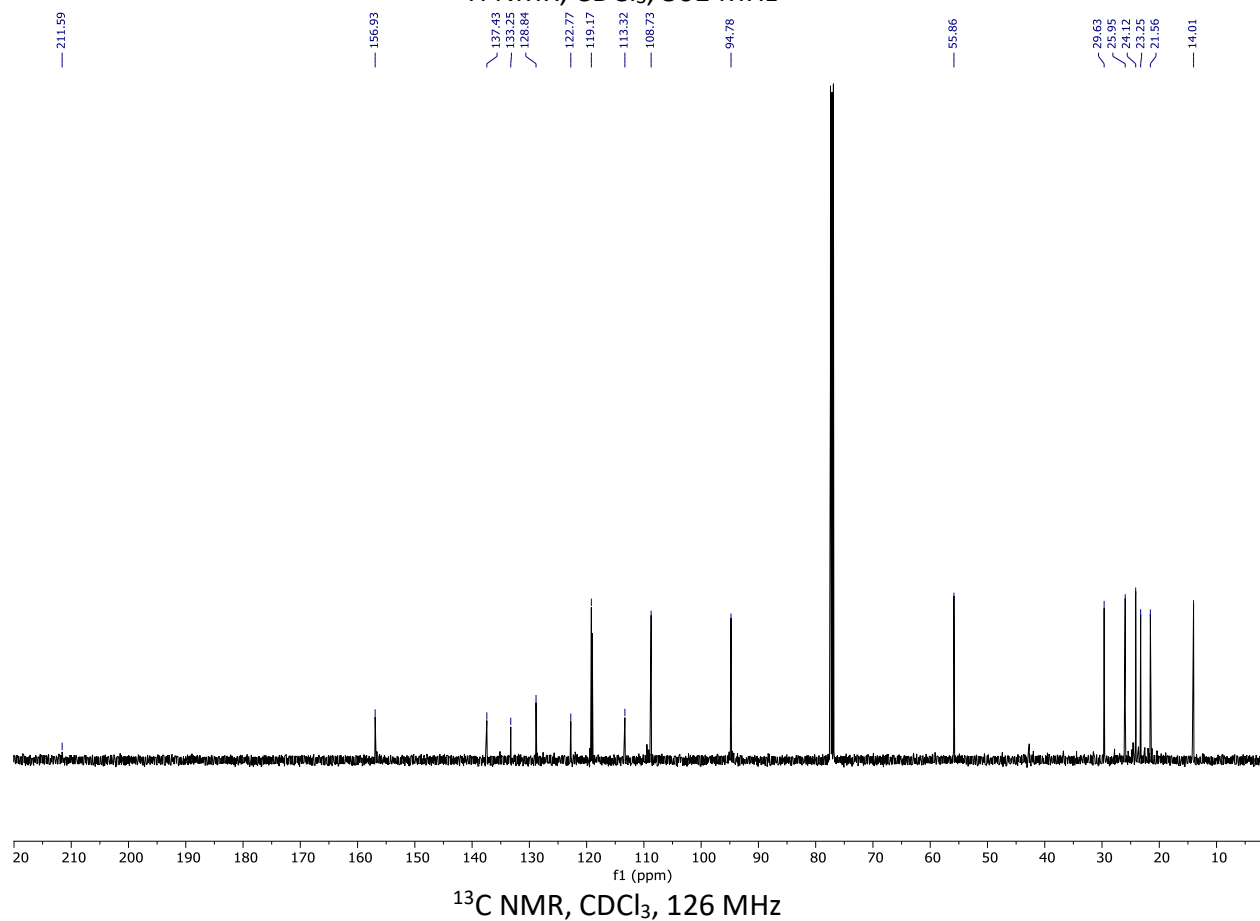

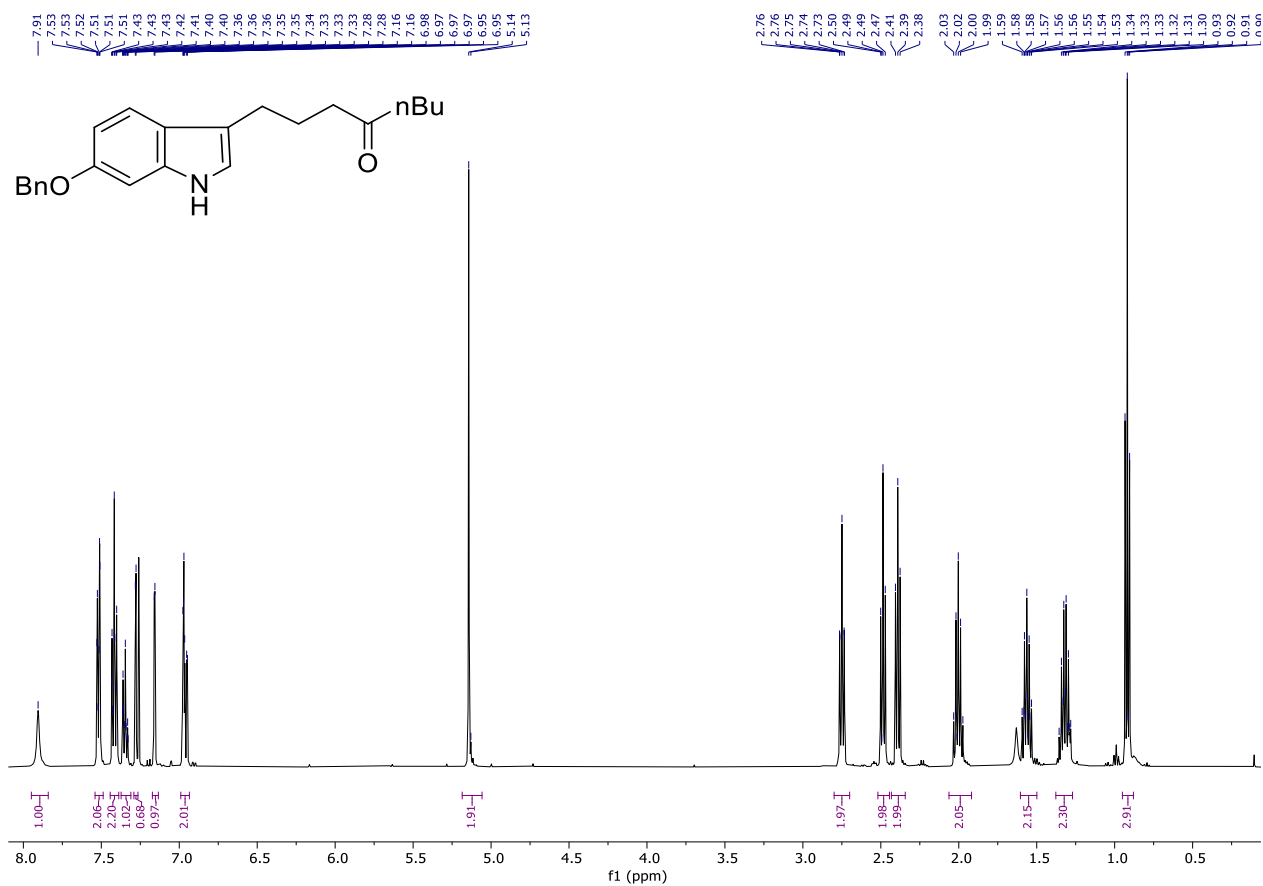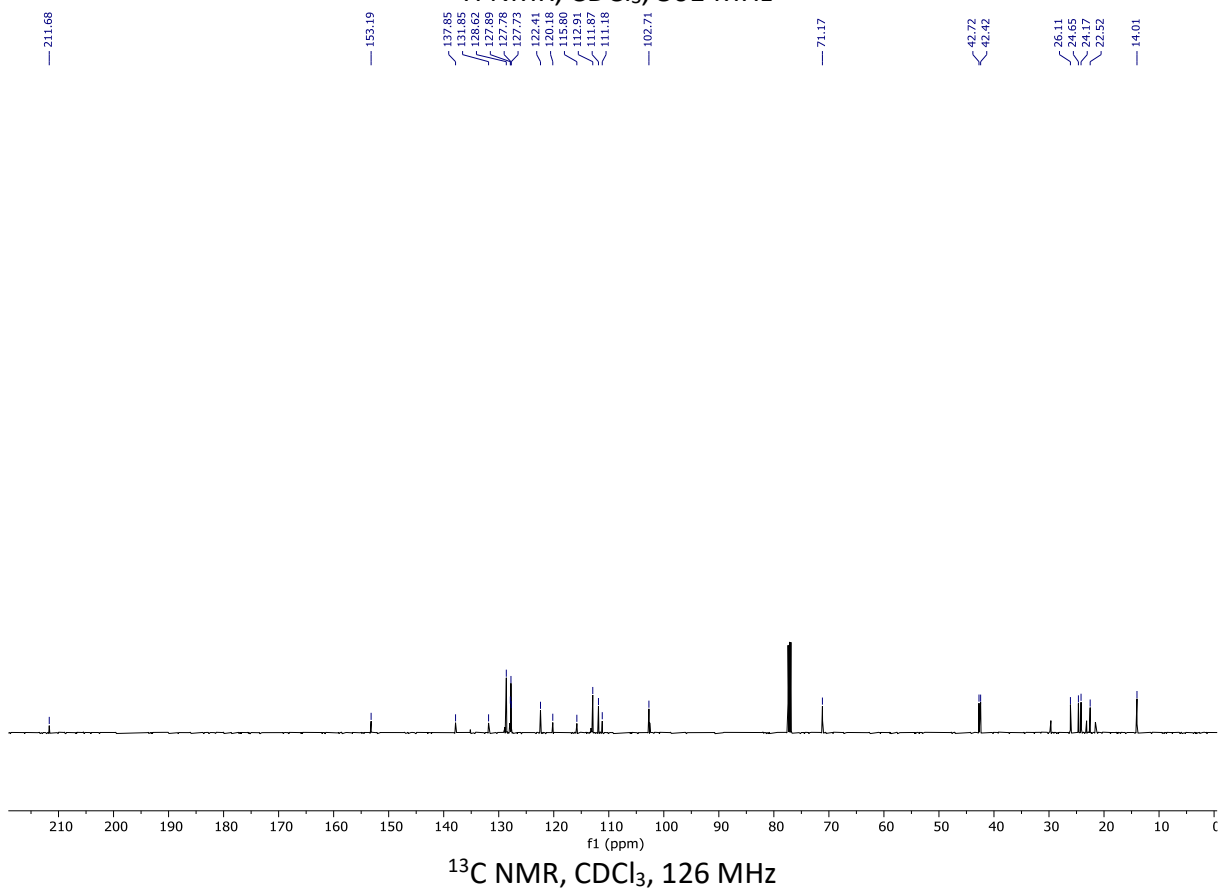

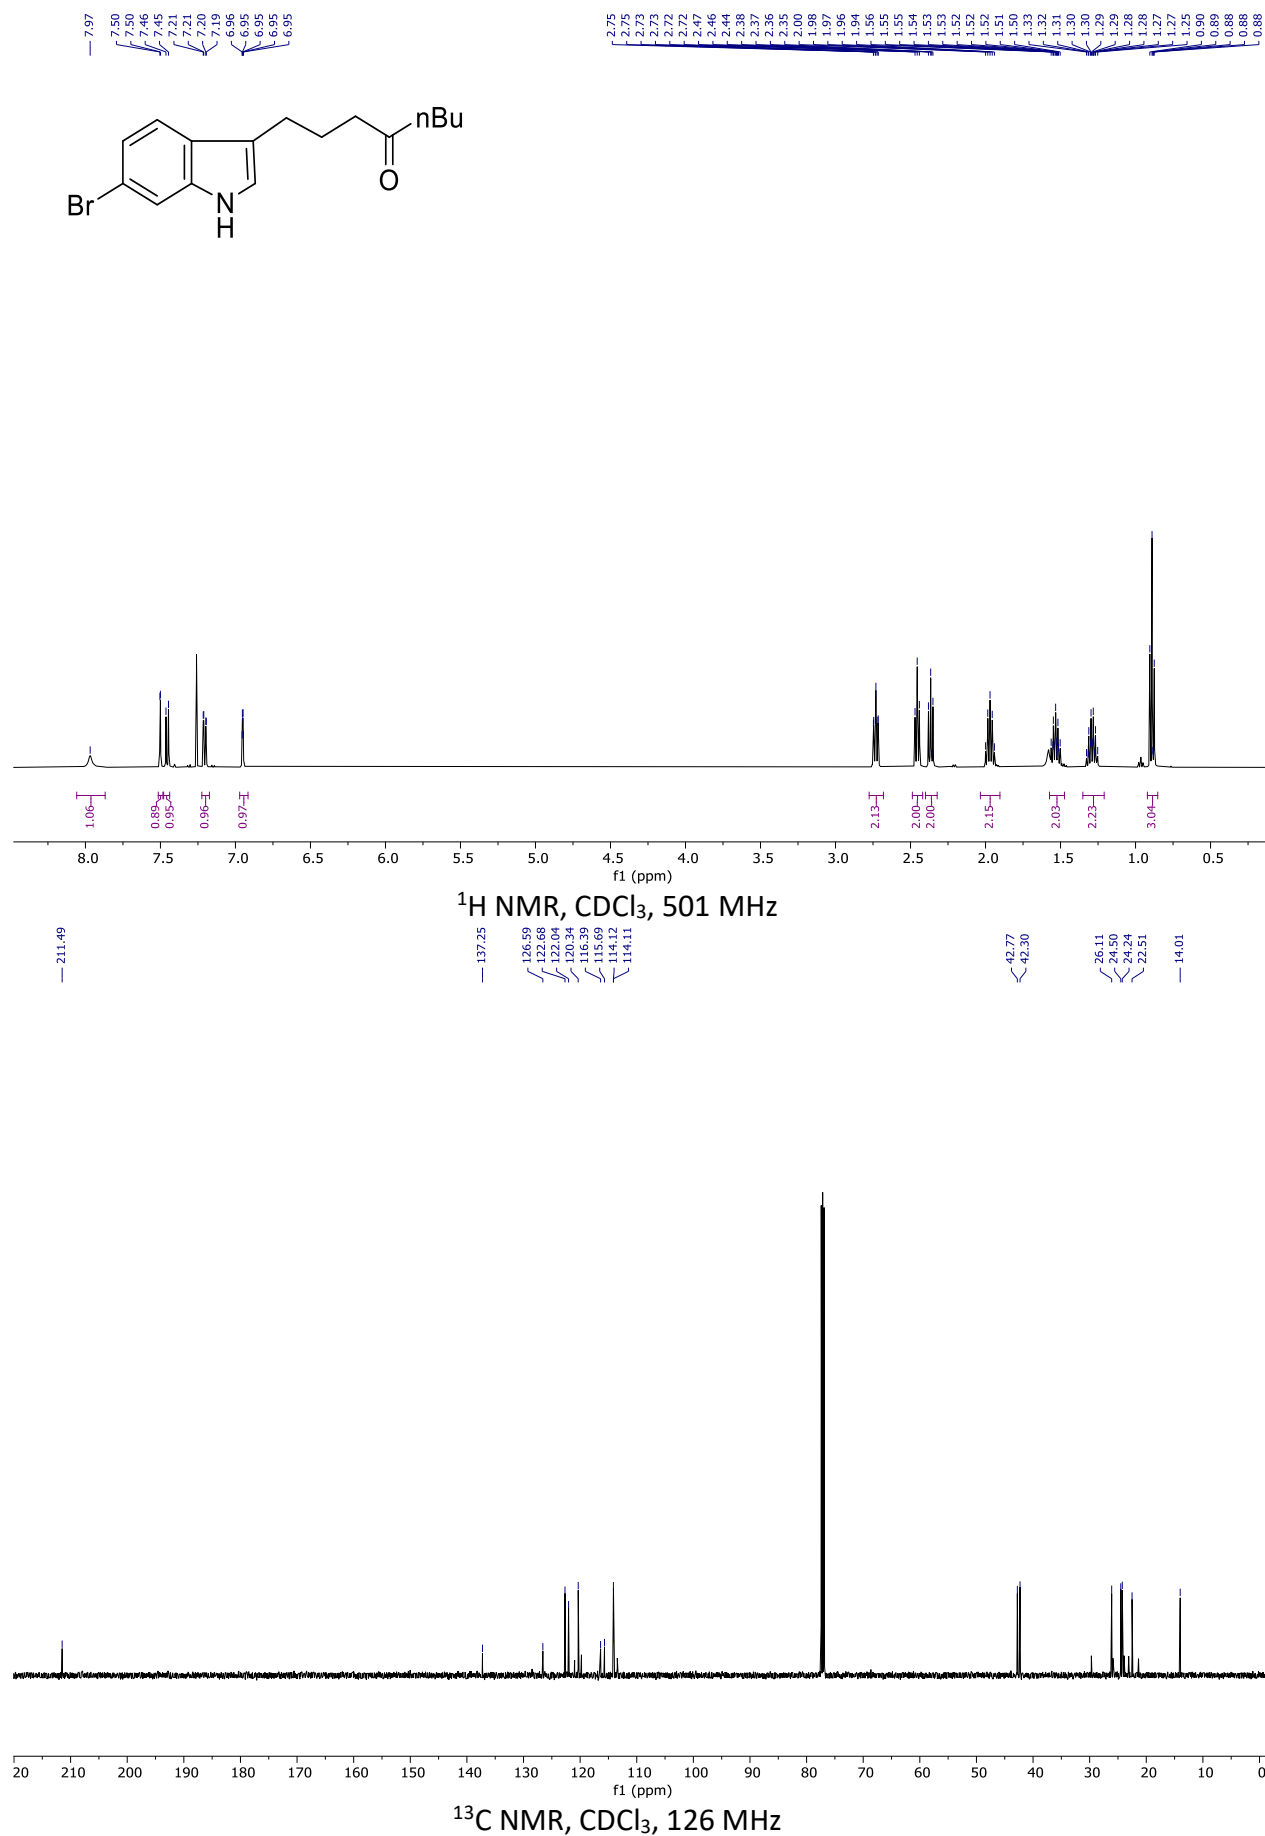

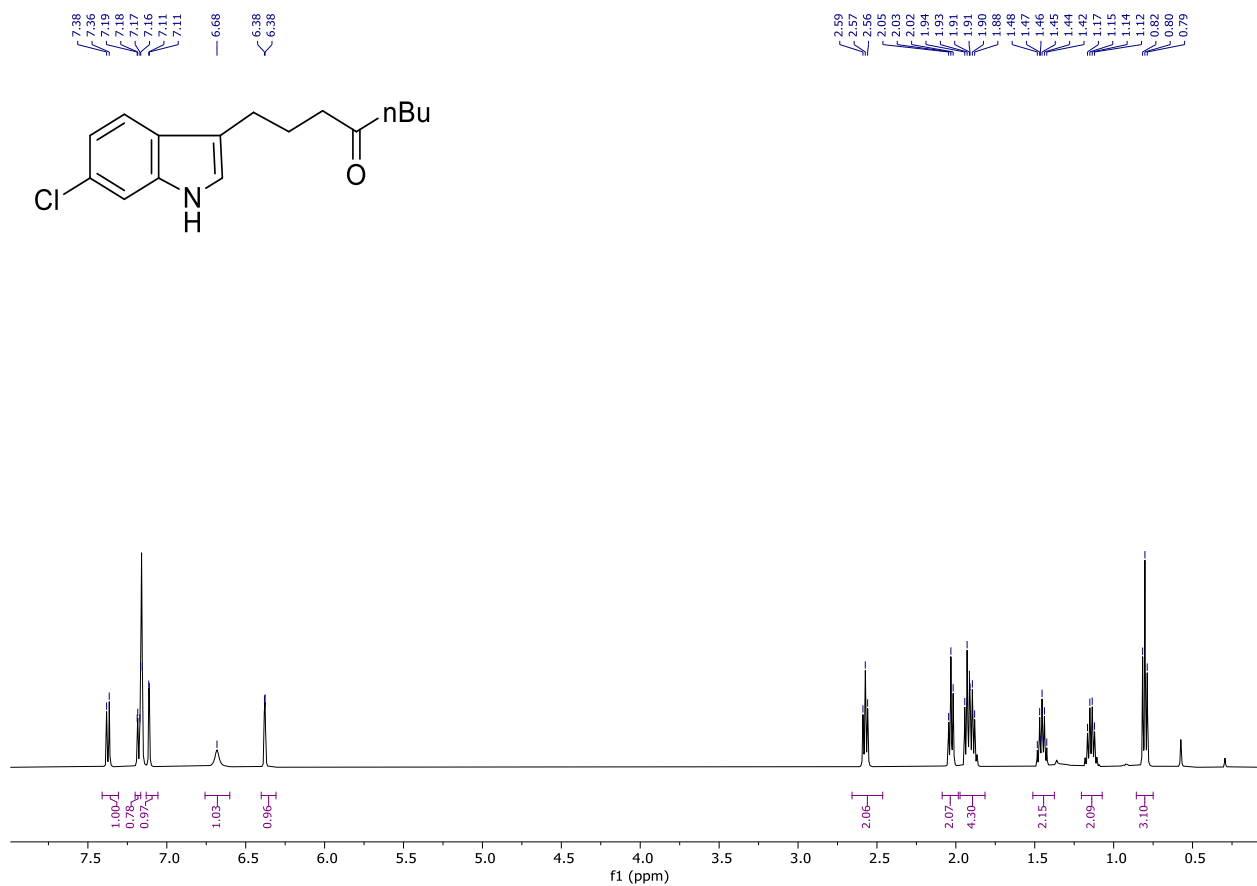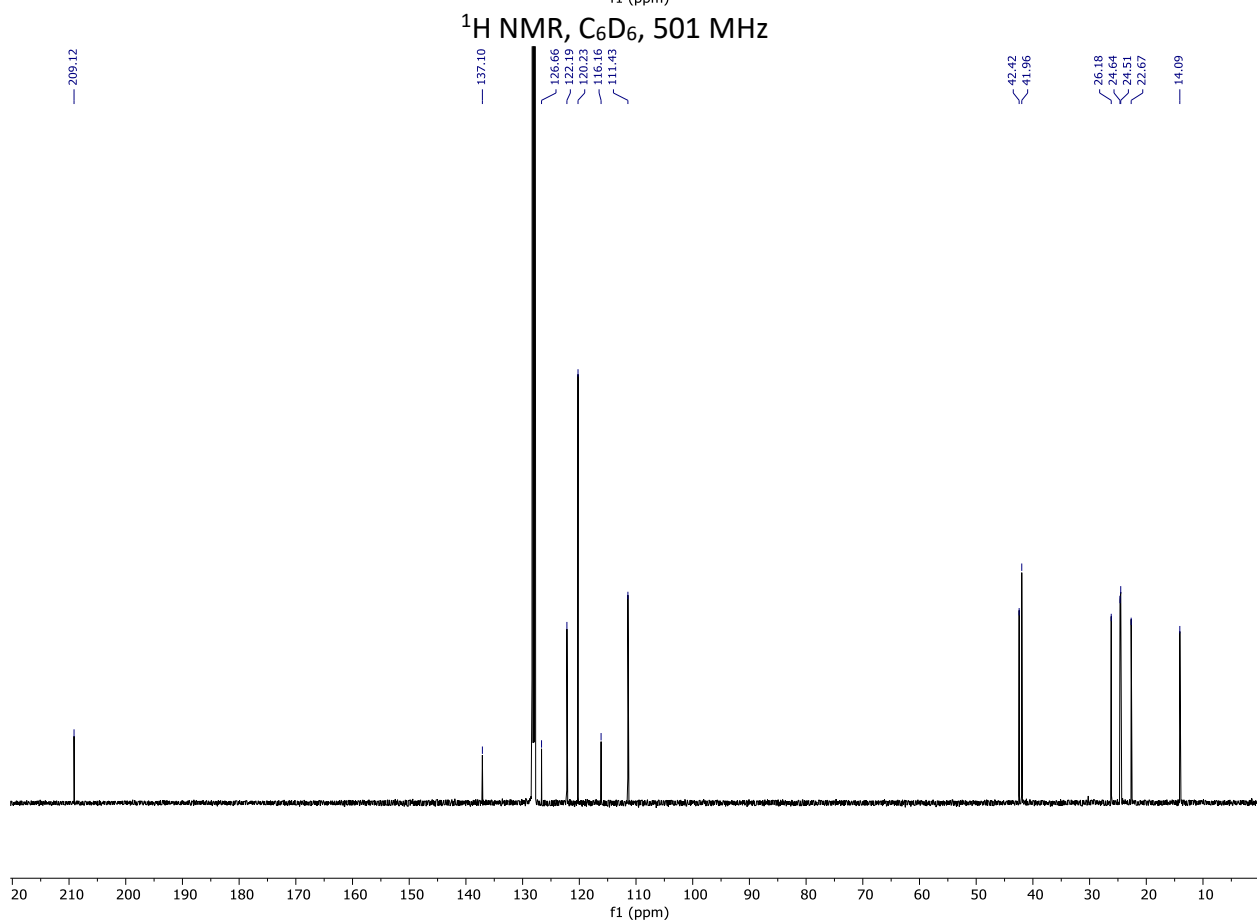

<sup>13</sup>C NMR, C<sub>6</sub>D<sub>6</sub>, 126 MHz

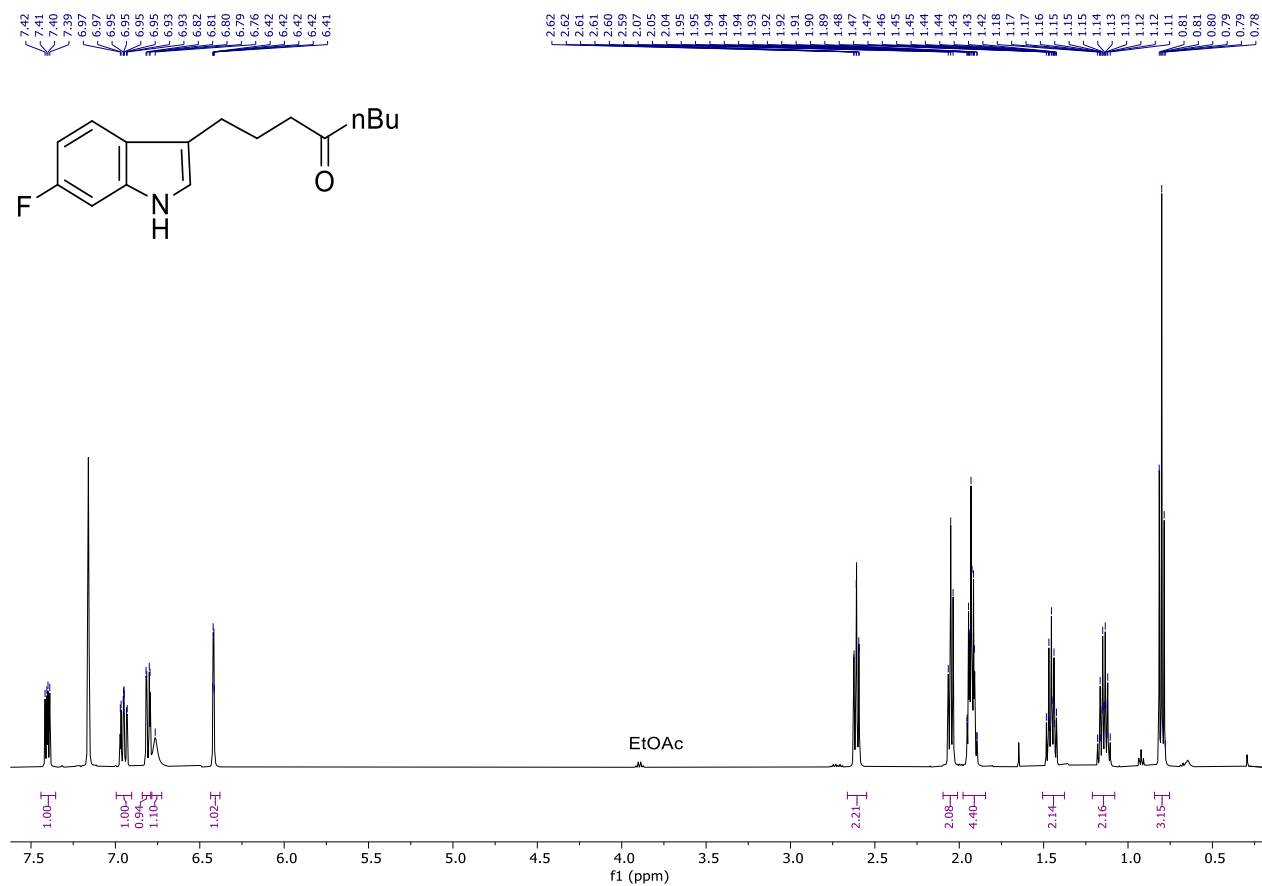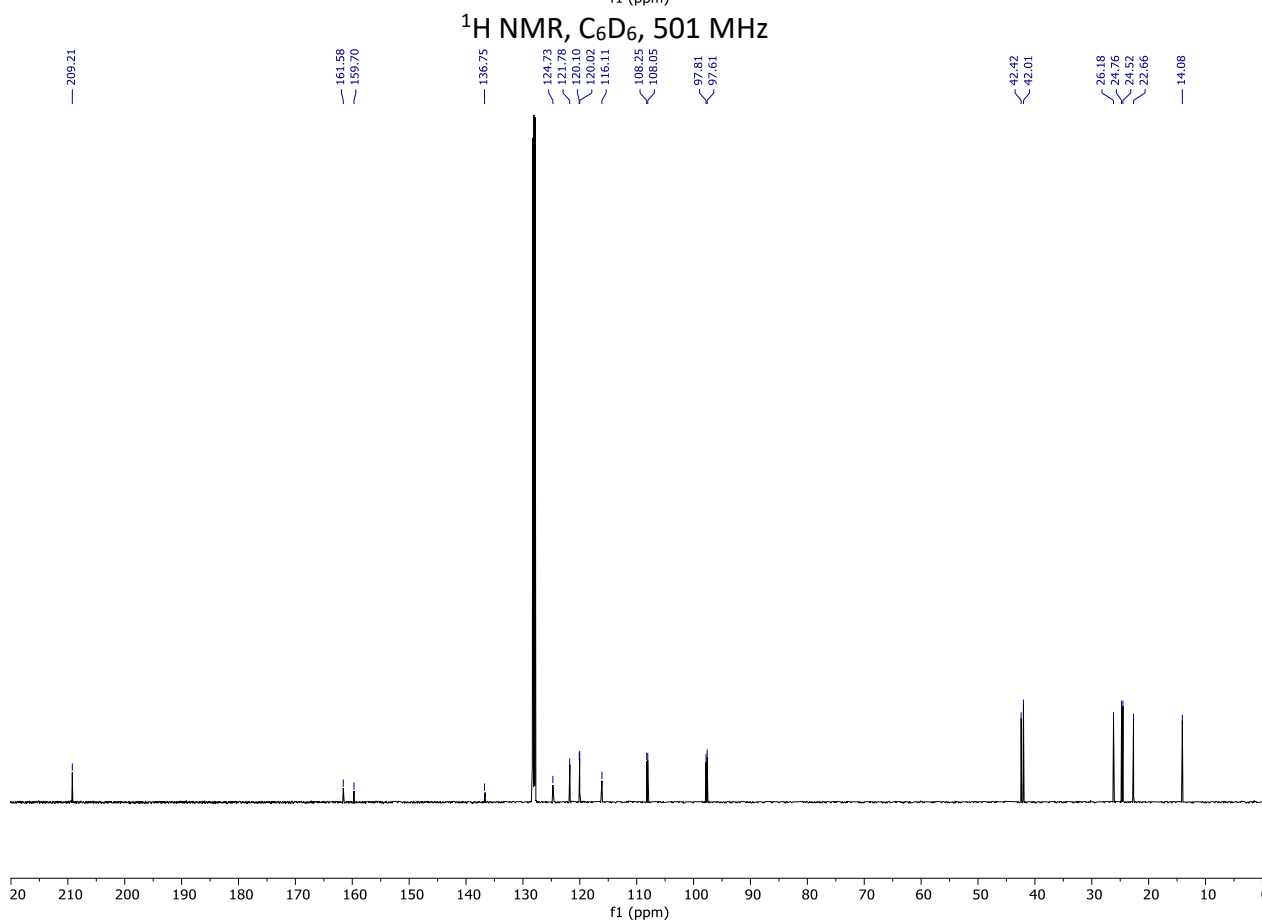<sup>13</sup>C NMR, C<sub>6</sub>D<sub>6</sub>, 126 MHz

S170



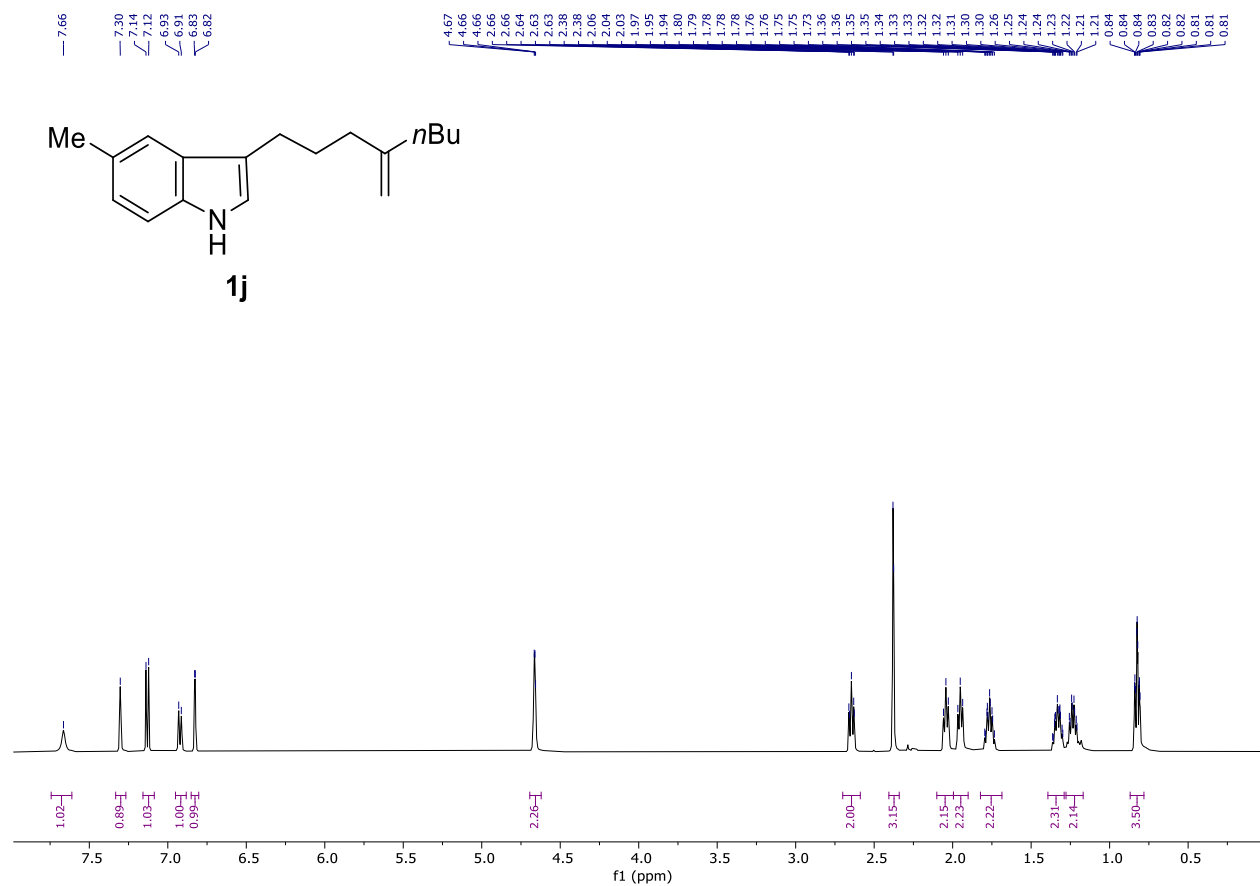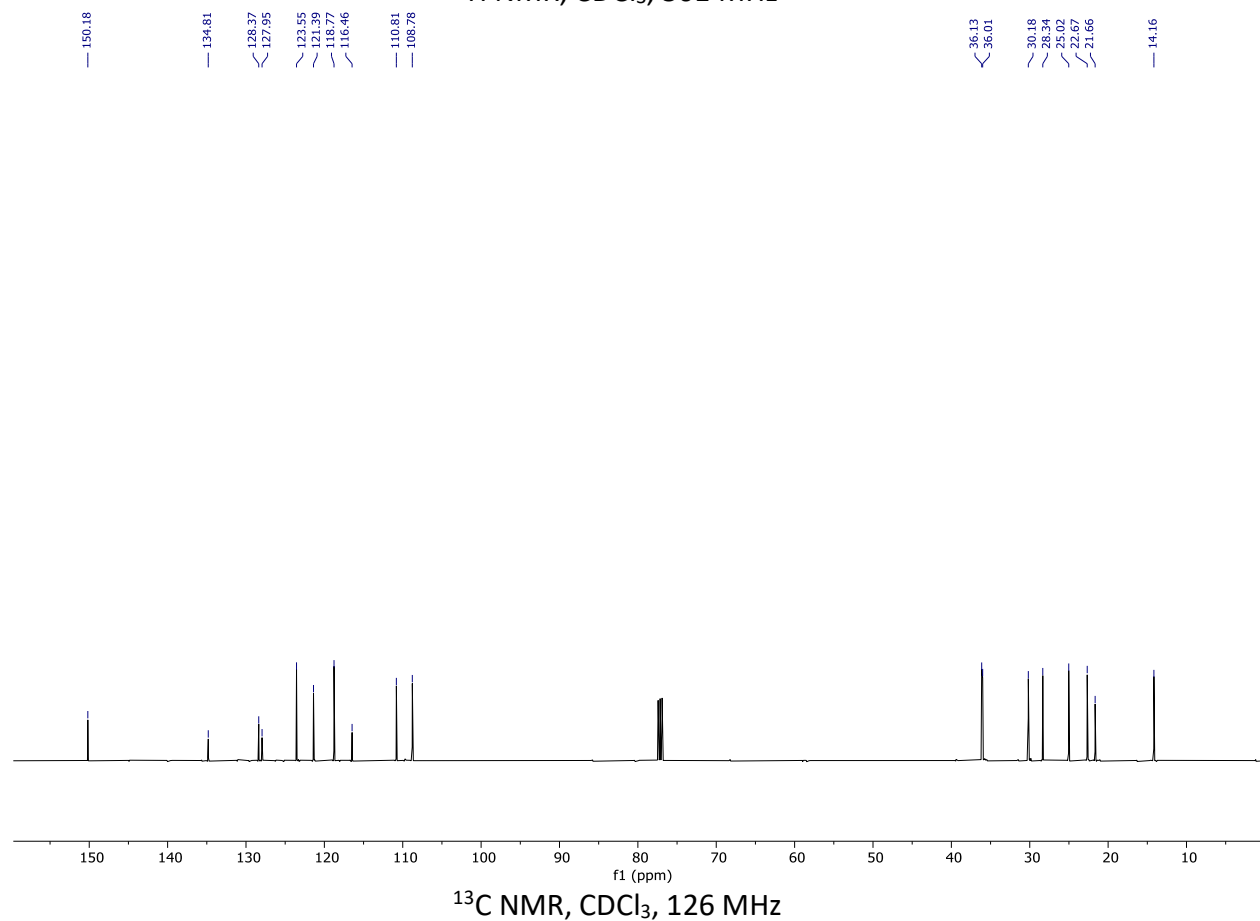

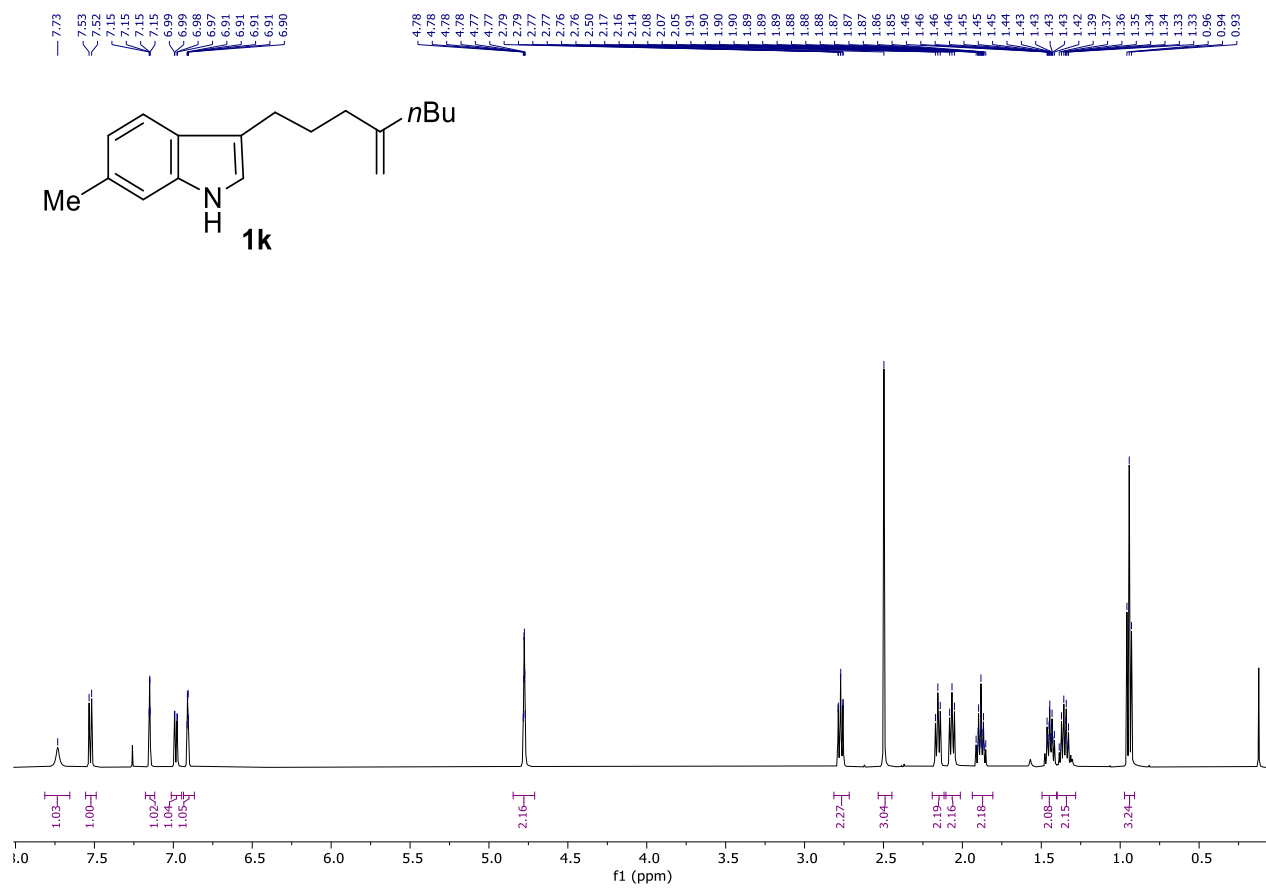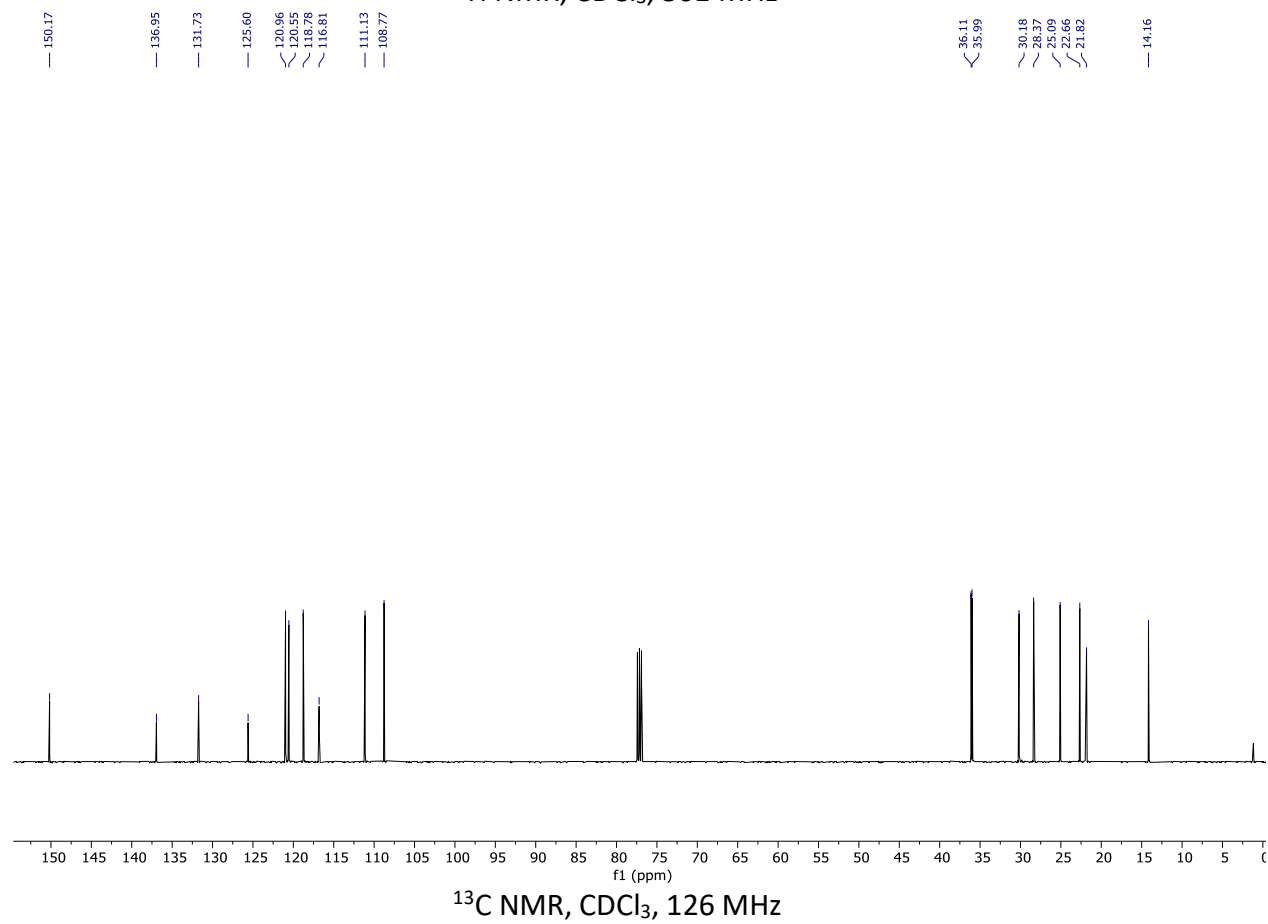

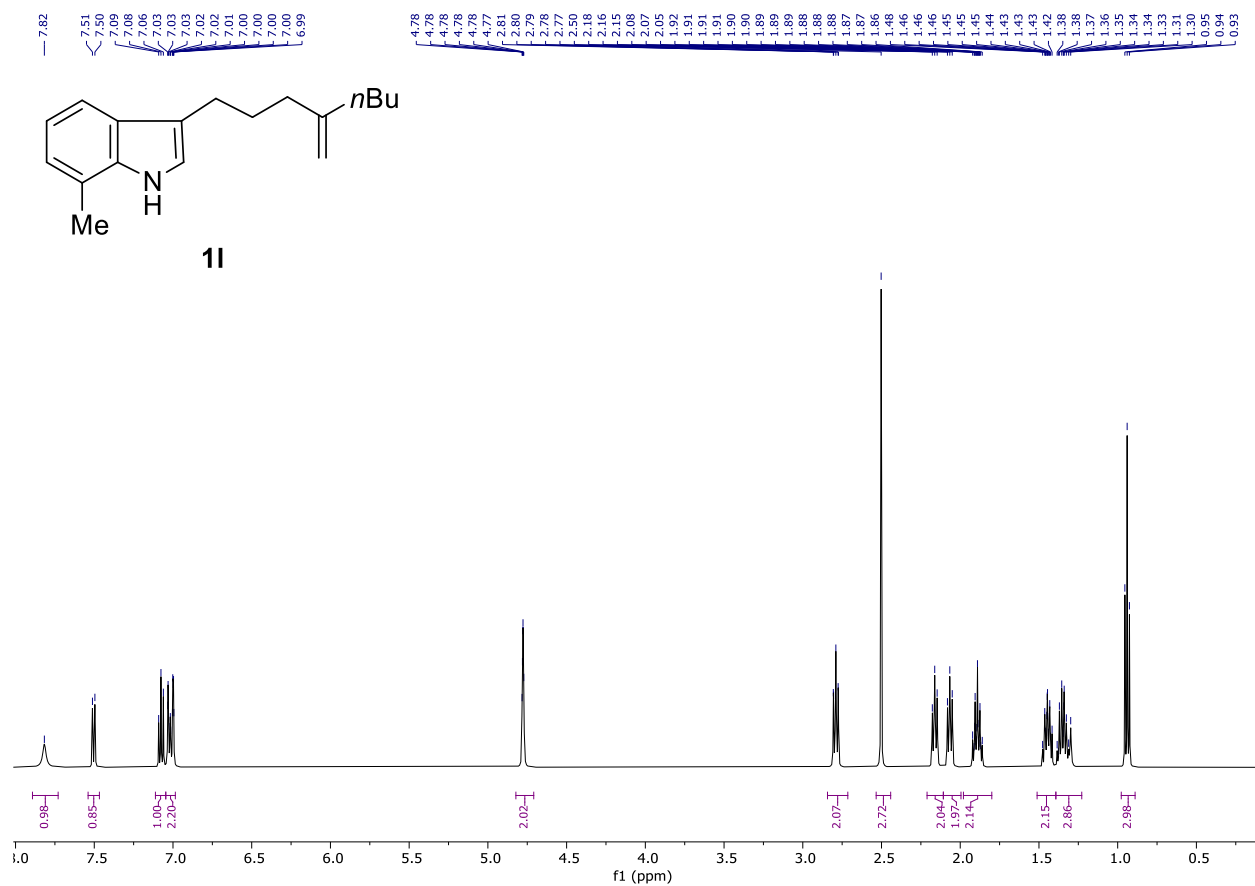

$^1\text{H}$  NMR, CDCl<sub>3</sub>, 501 MHz

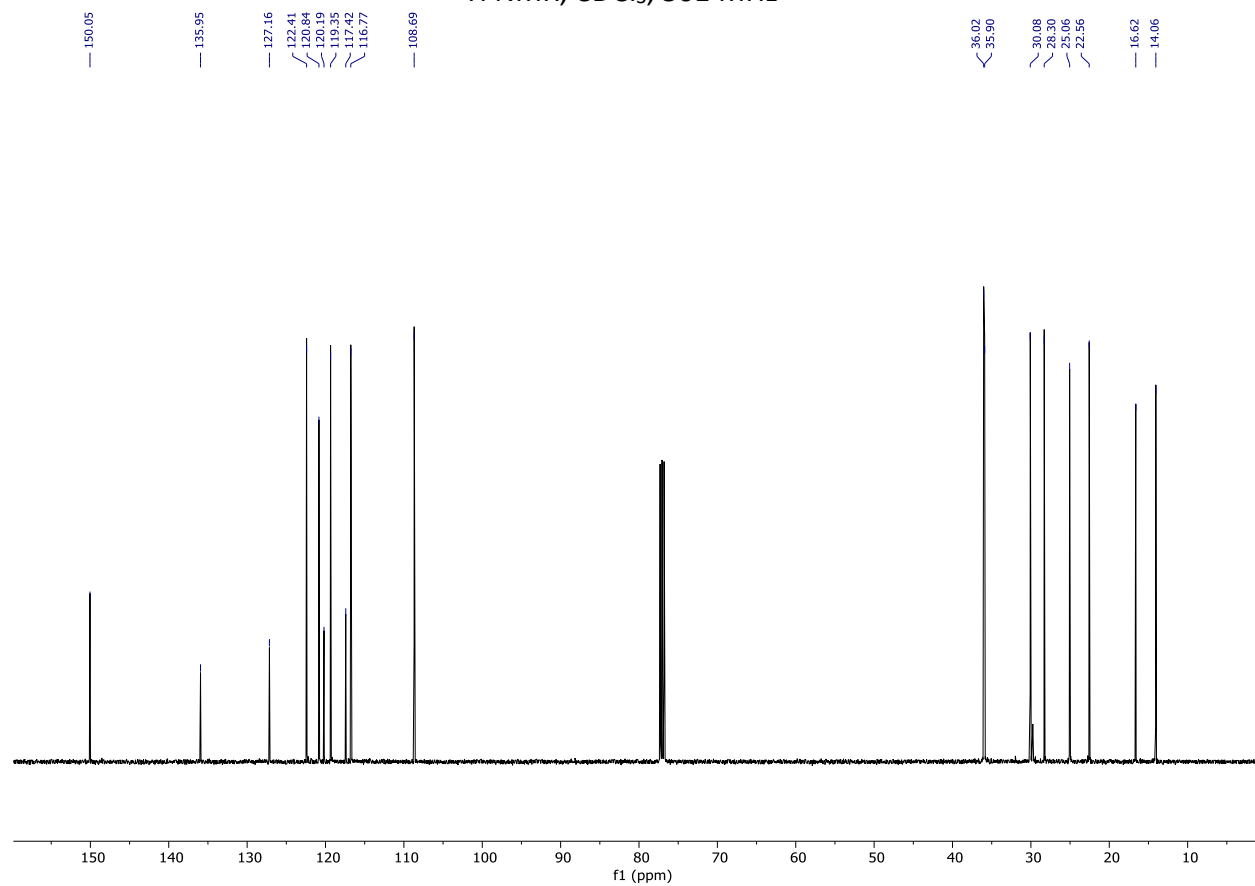

$^{13}\text{C}$  NMR, CDCl<sub>3</sub>, 126 MHz

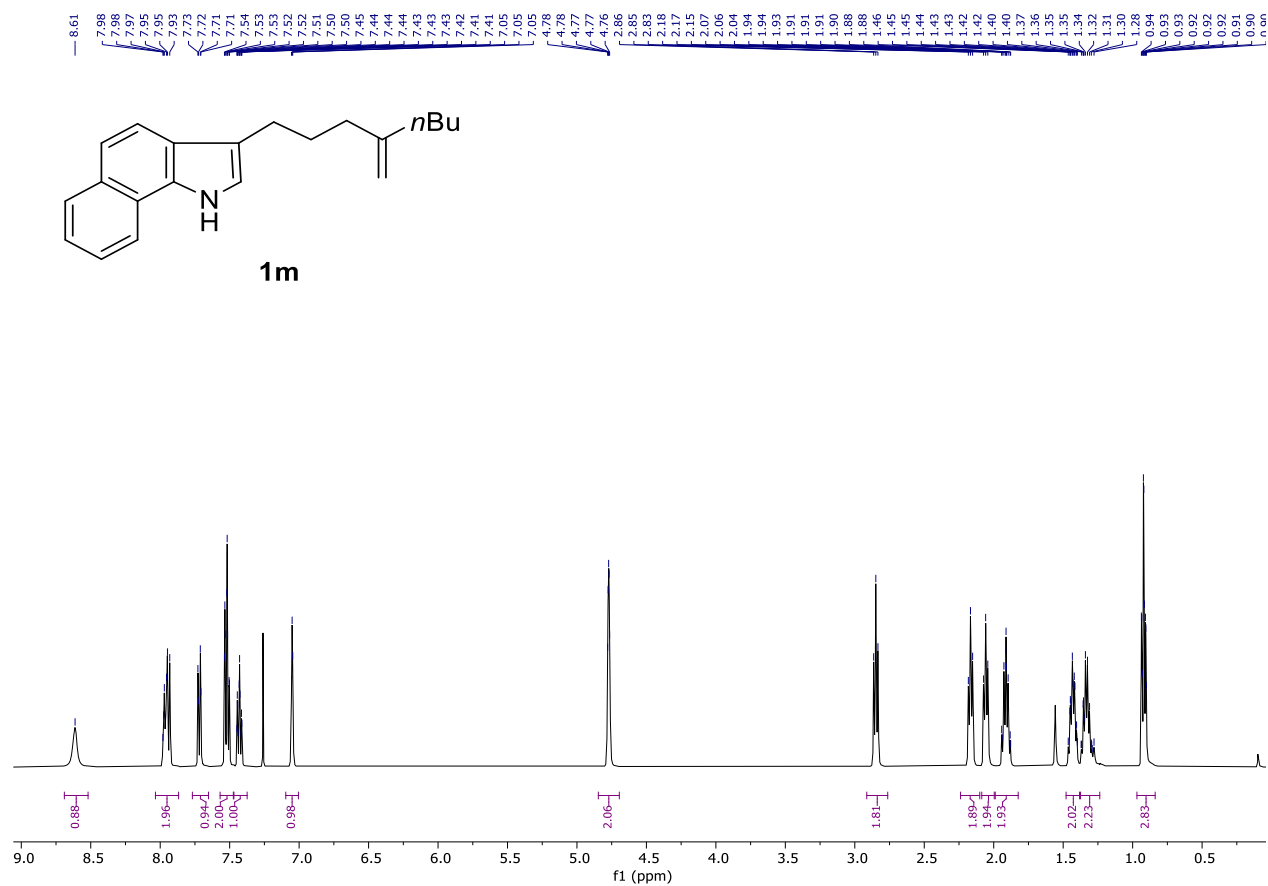

$^1\text{H}$  NMR, CDCl<sub>3</sub>, 501 MHz

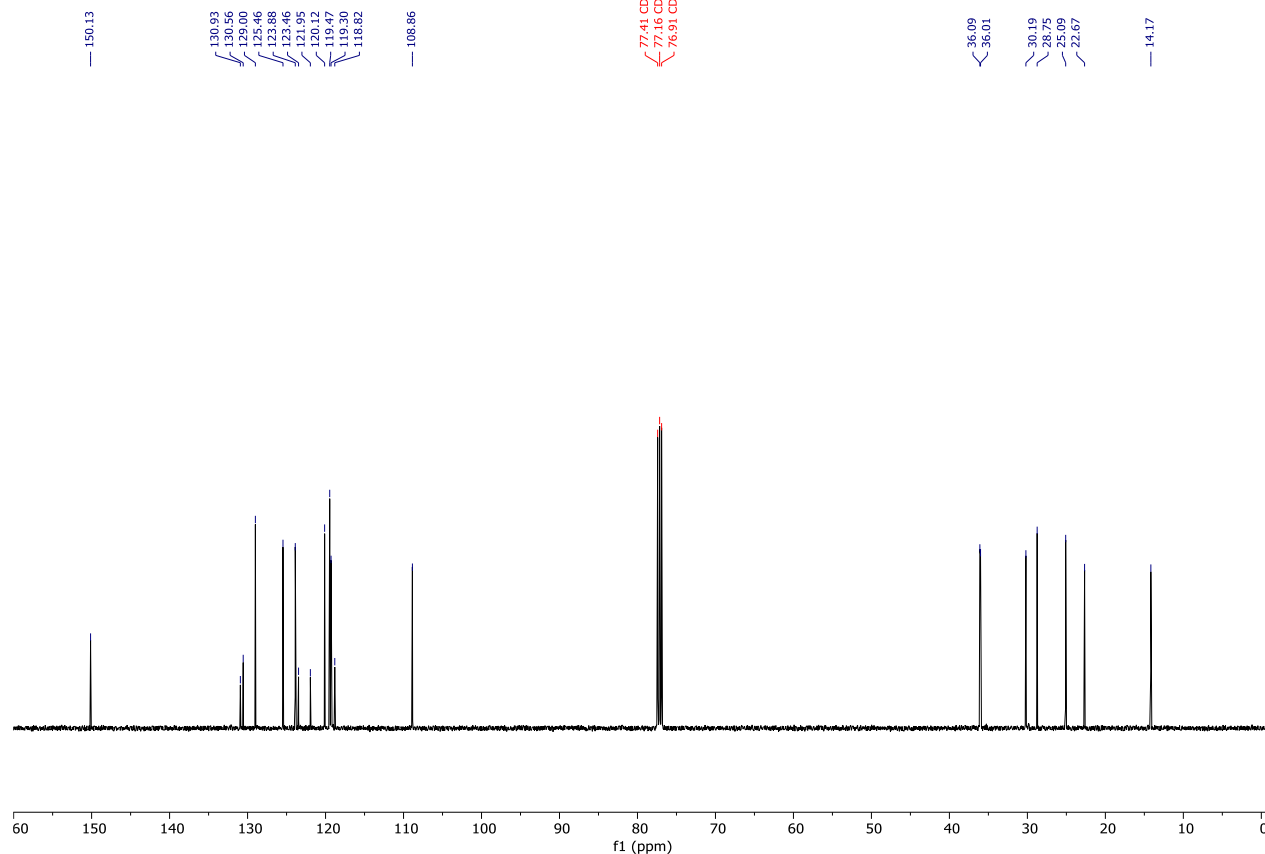

$^{13}\text{C}$  NMR, CDCl<sub>3</sub>, 126 MHz

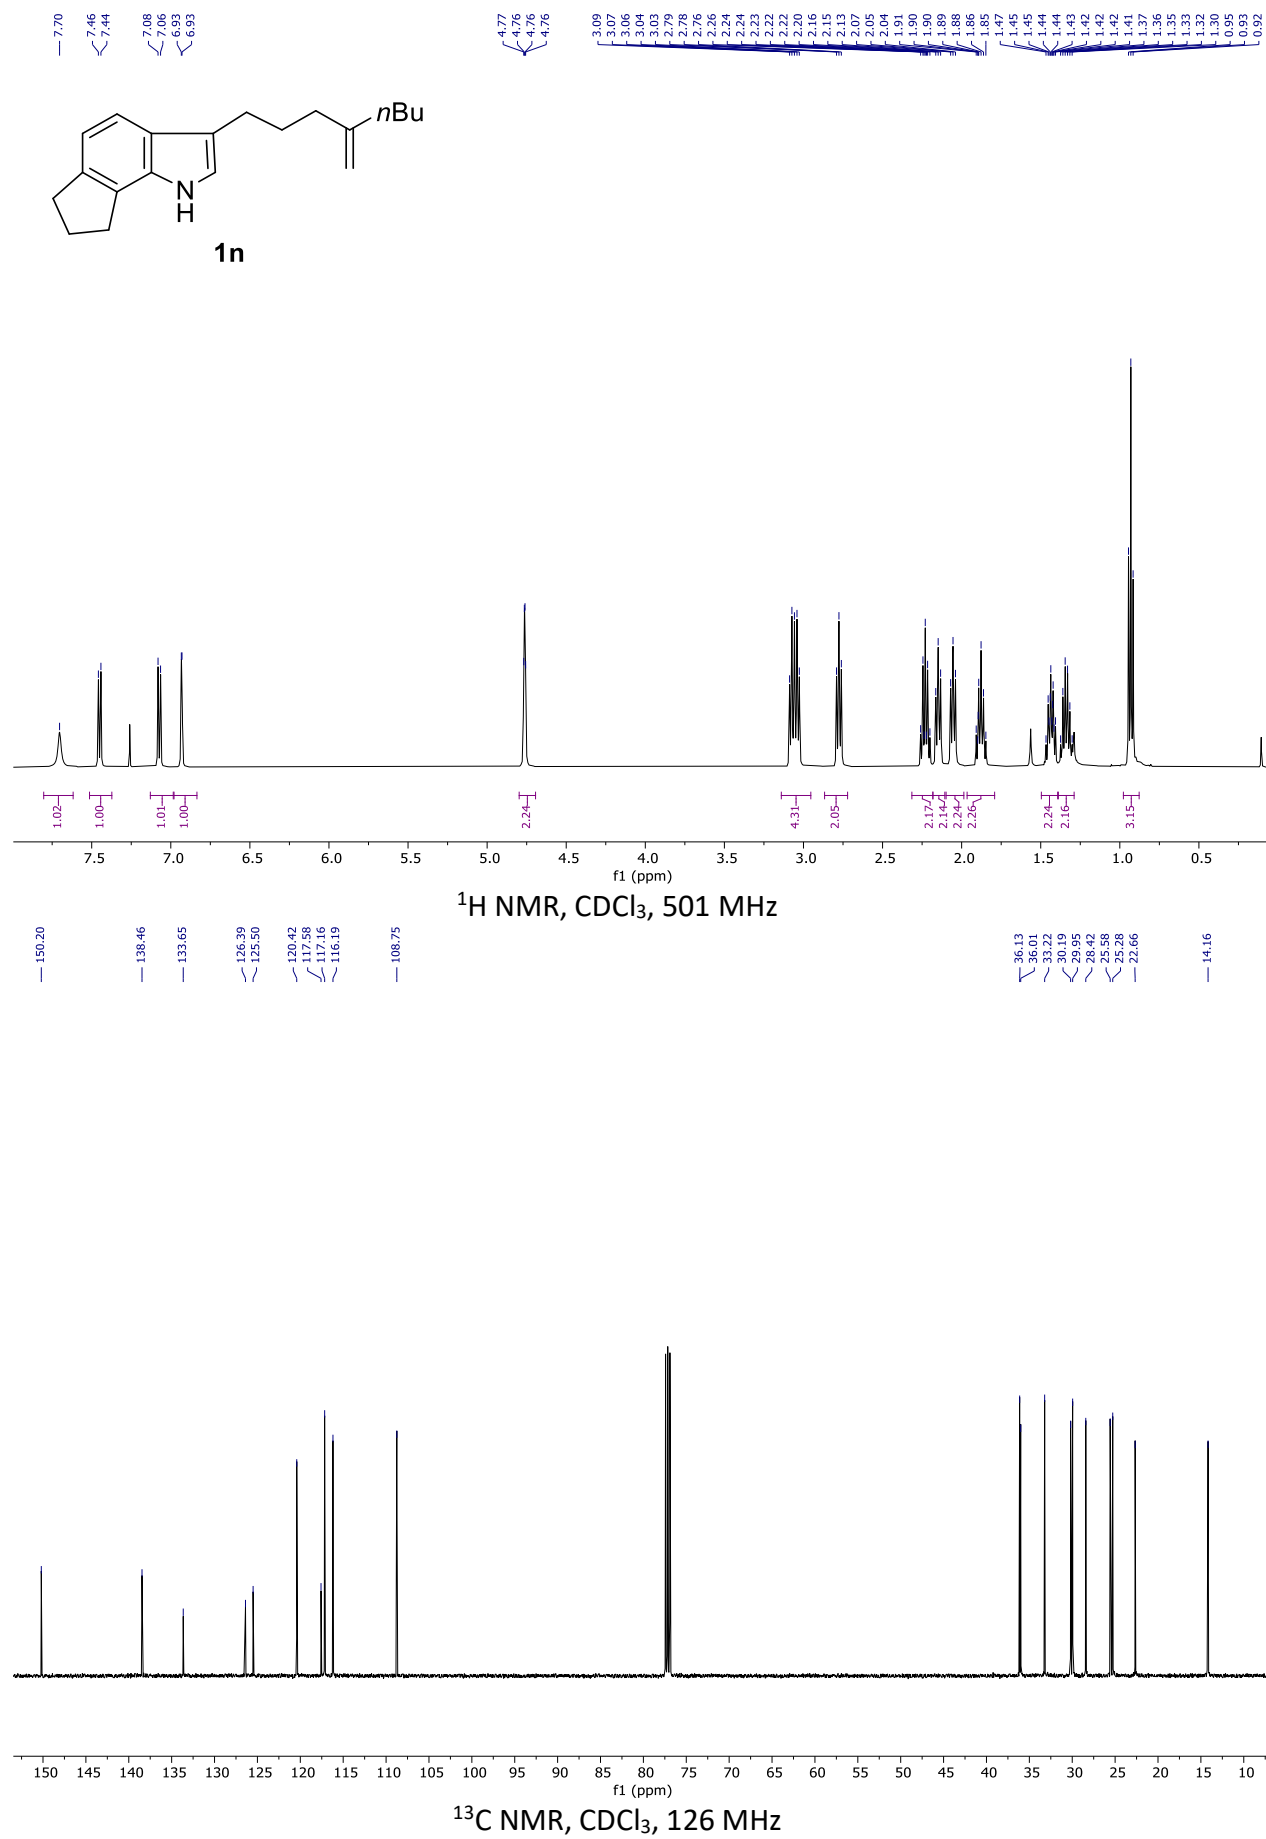

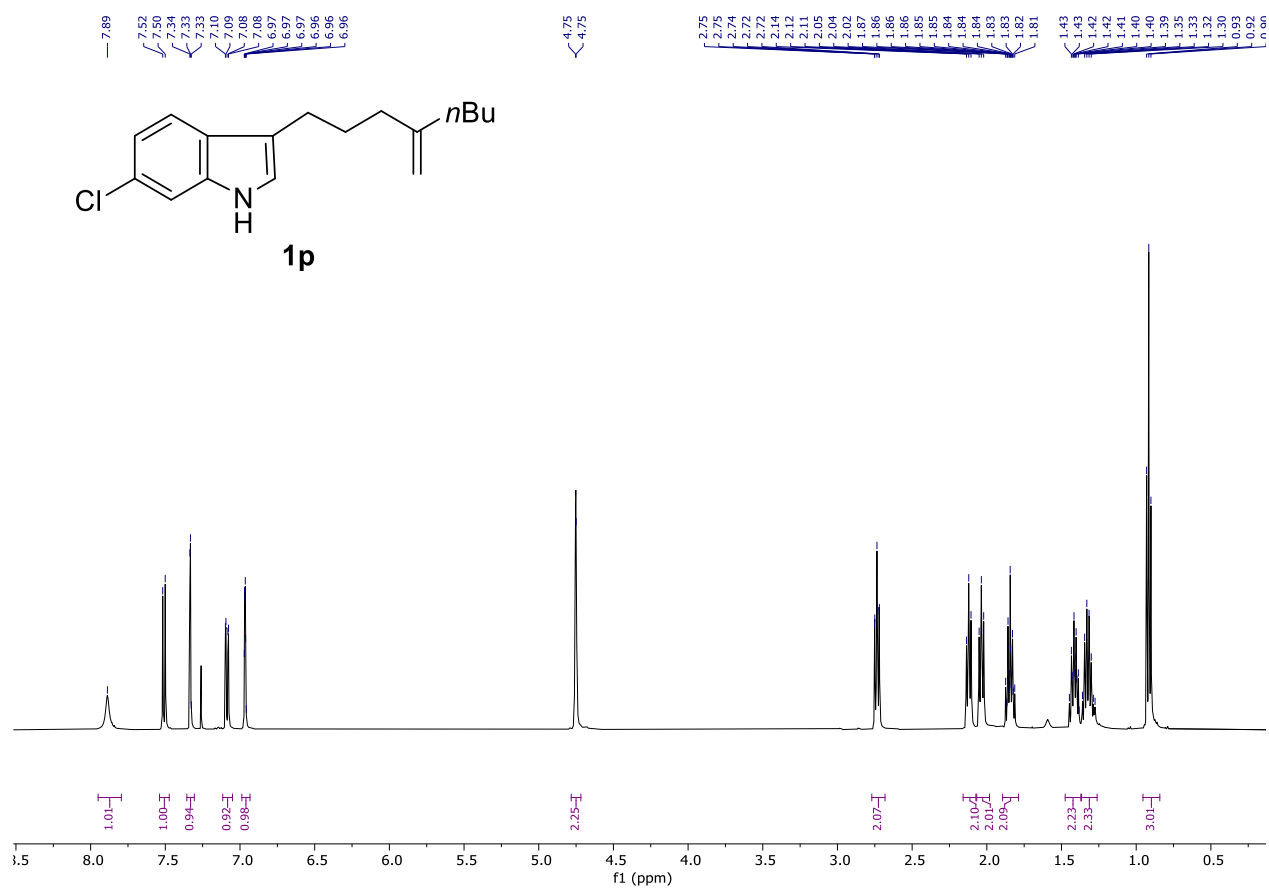

$^1\text{H}$  NMR,  $\text{CDCl}_3$ , 501 MHz

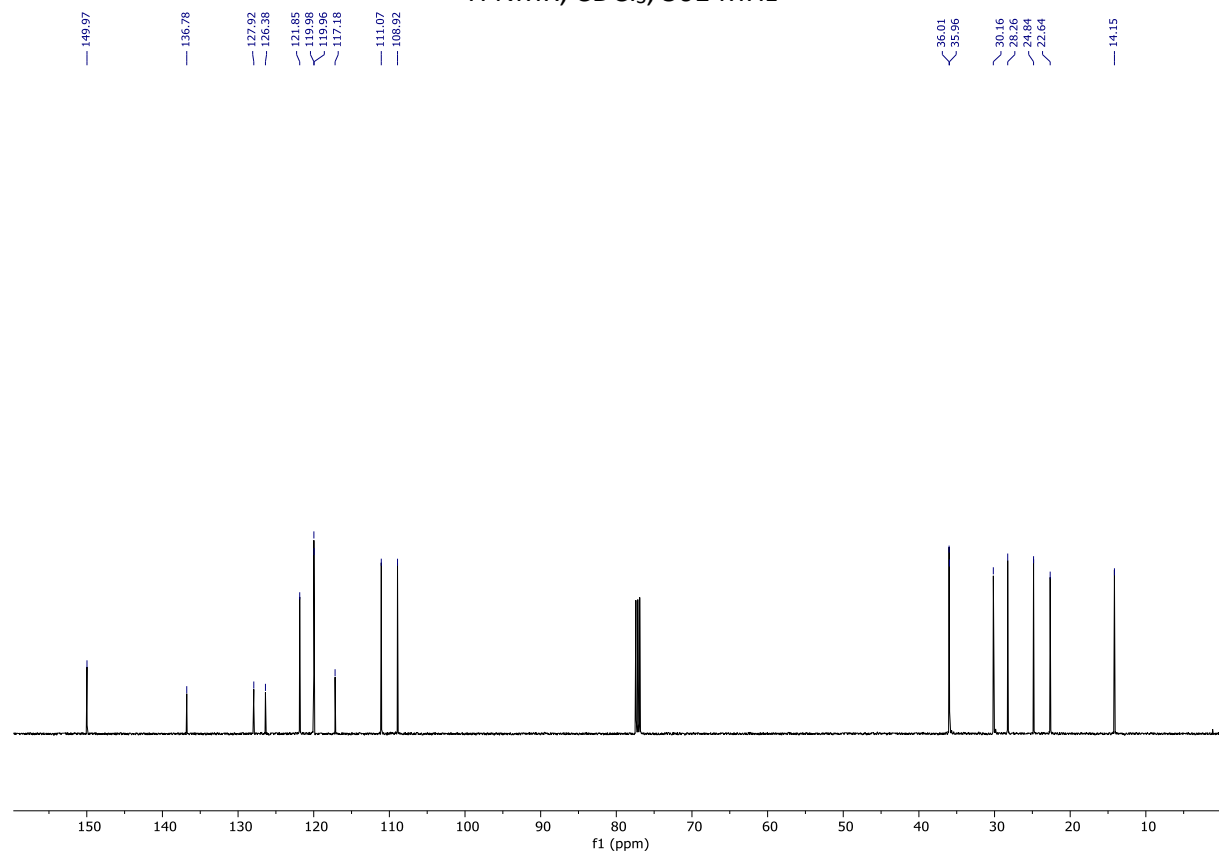

$^{13}\text{C}$  NMR,  $\text{CDCl}_3$ , 126 MHz

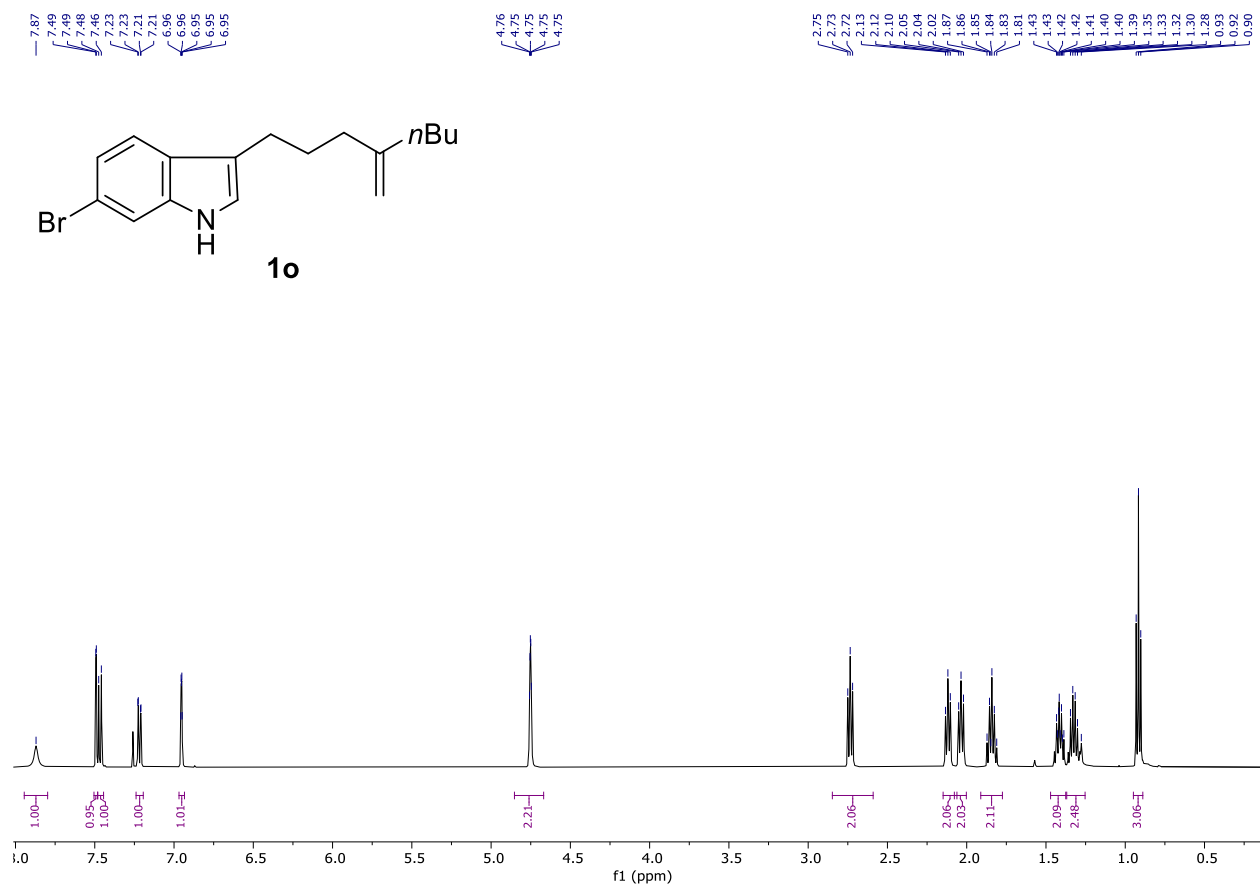

$^1\text{H}$  NMR, CDCl<sub>3</sub>, 501 MHz

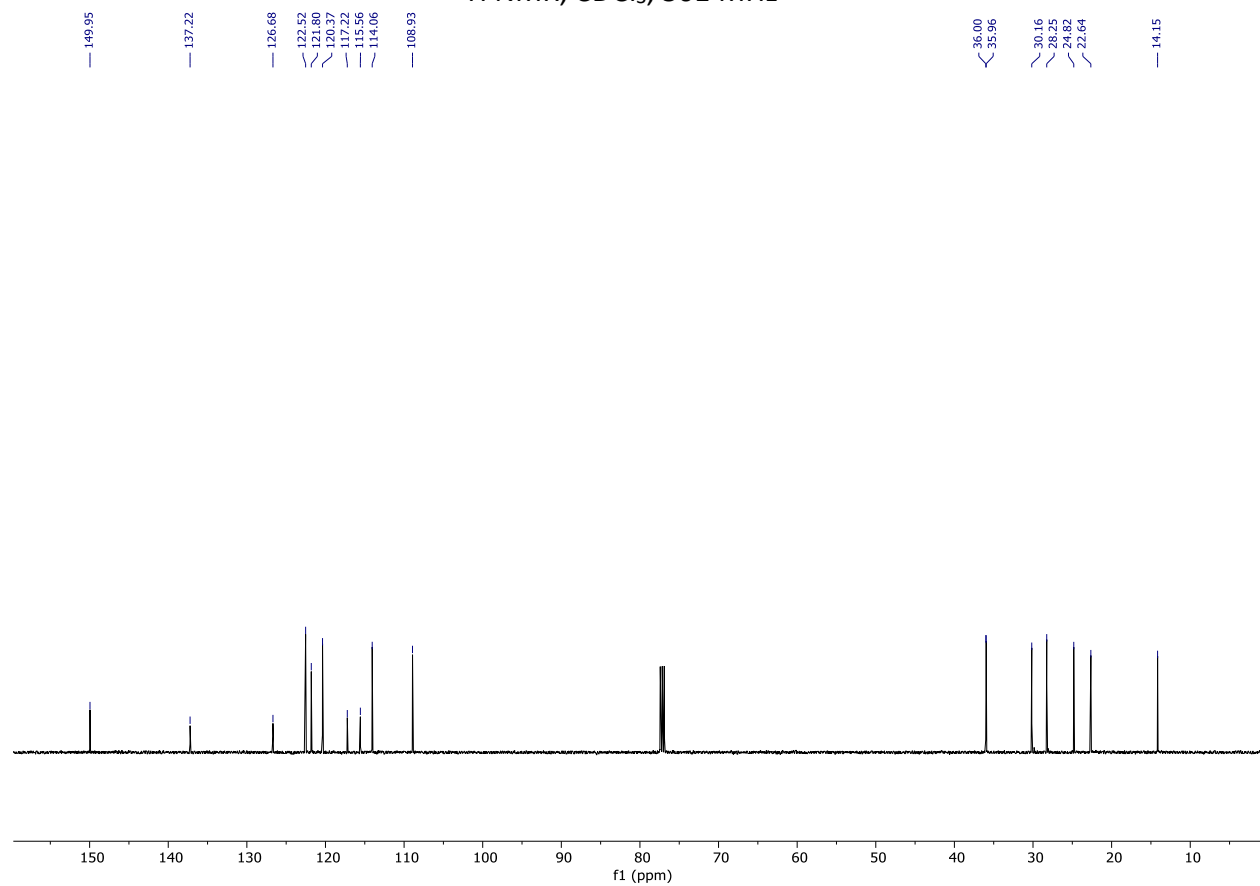

$^{13}\text{C}$  NMR, CDCl<sub>3</sub>, 126 MHz

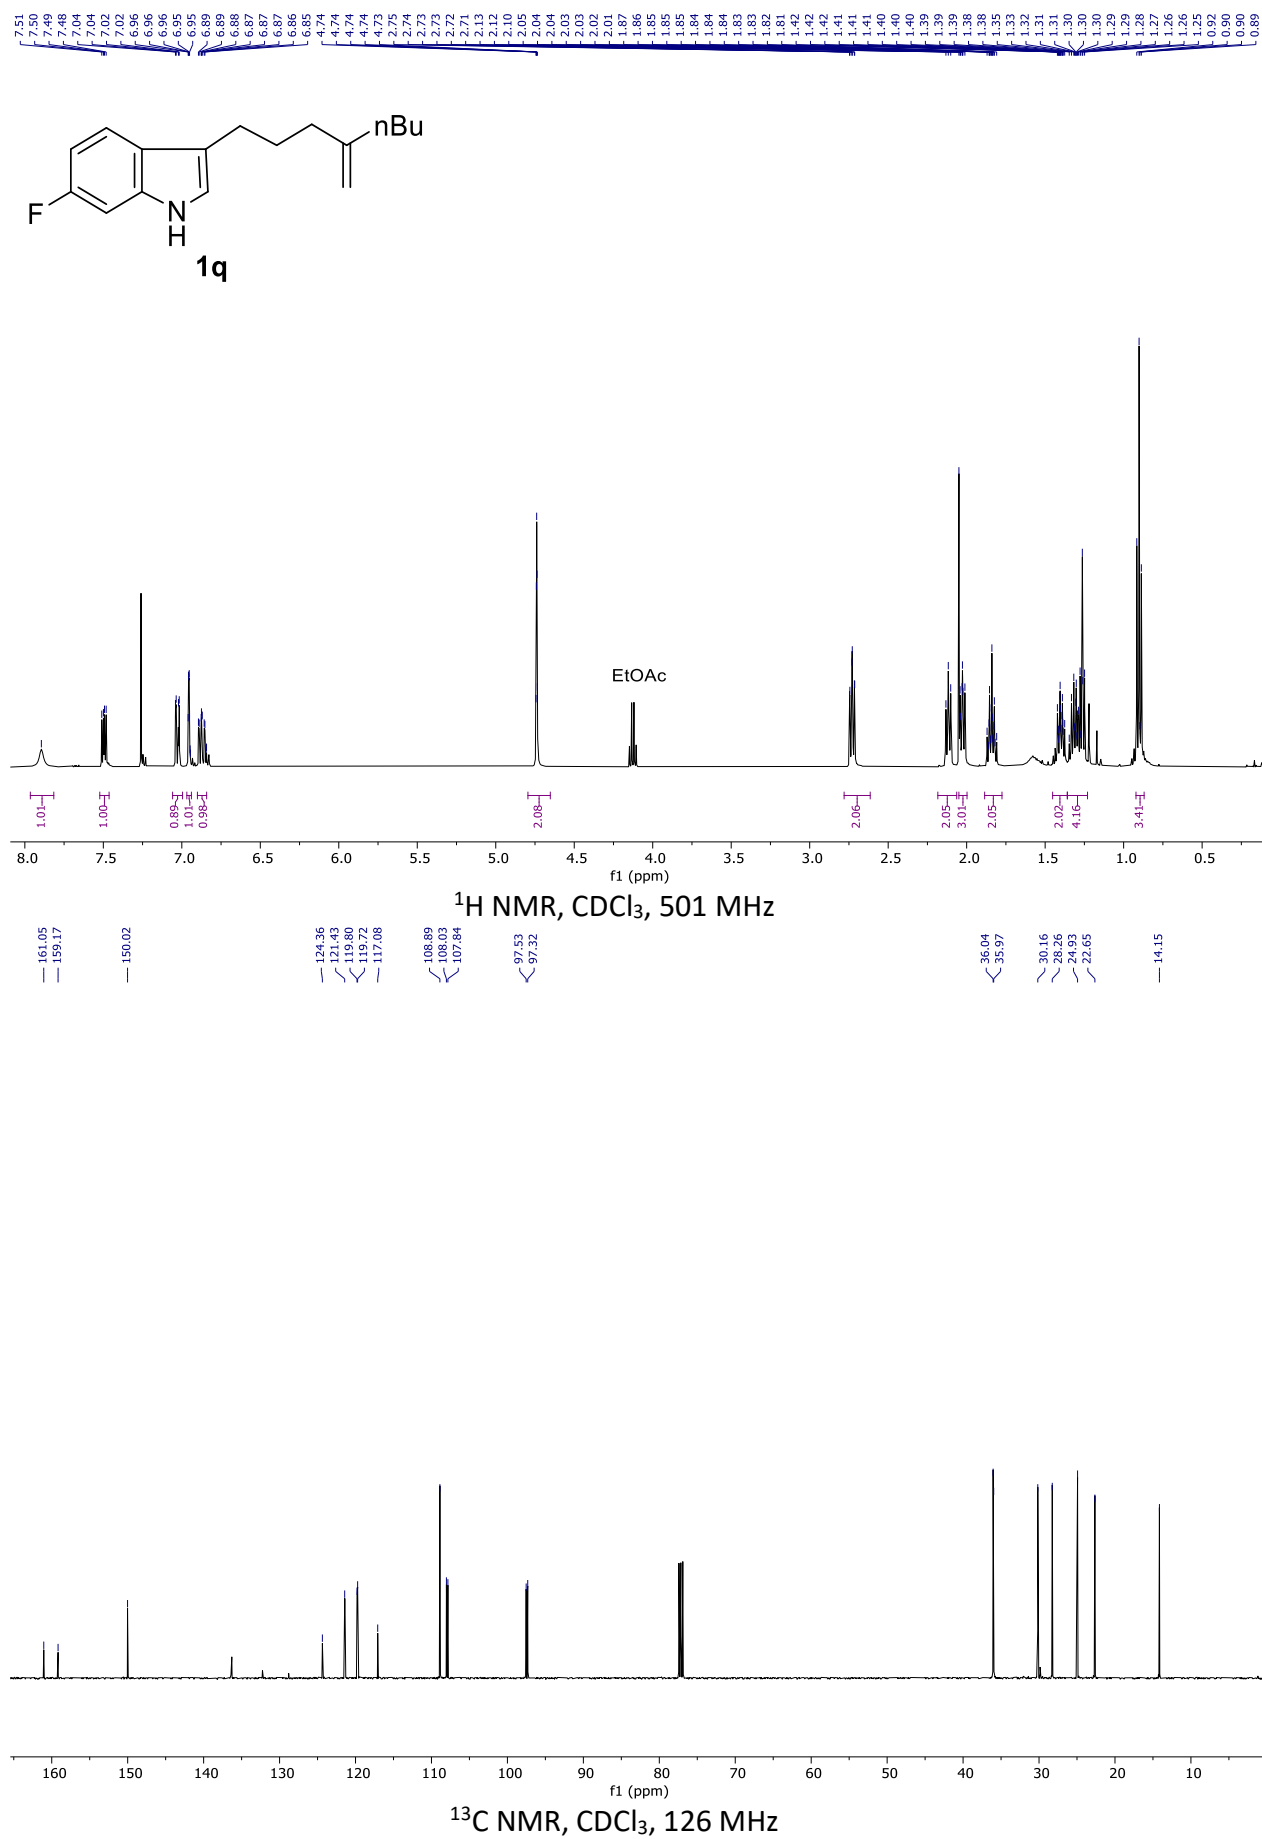

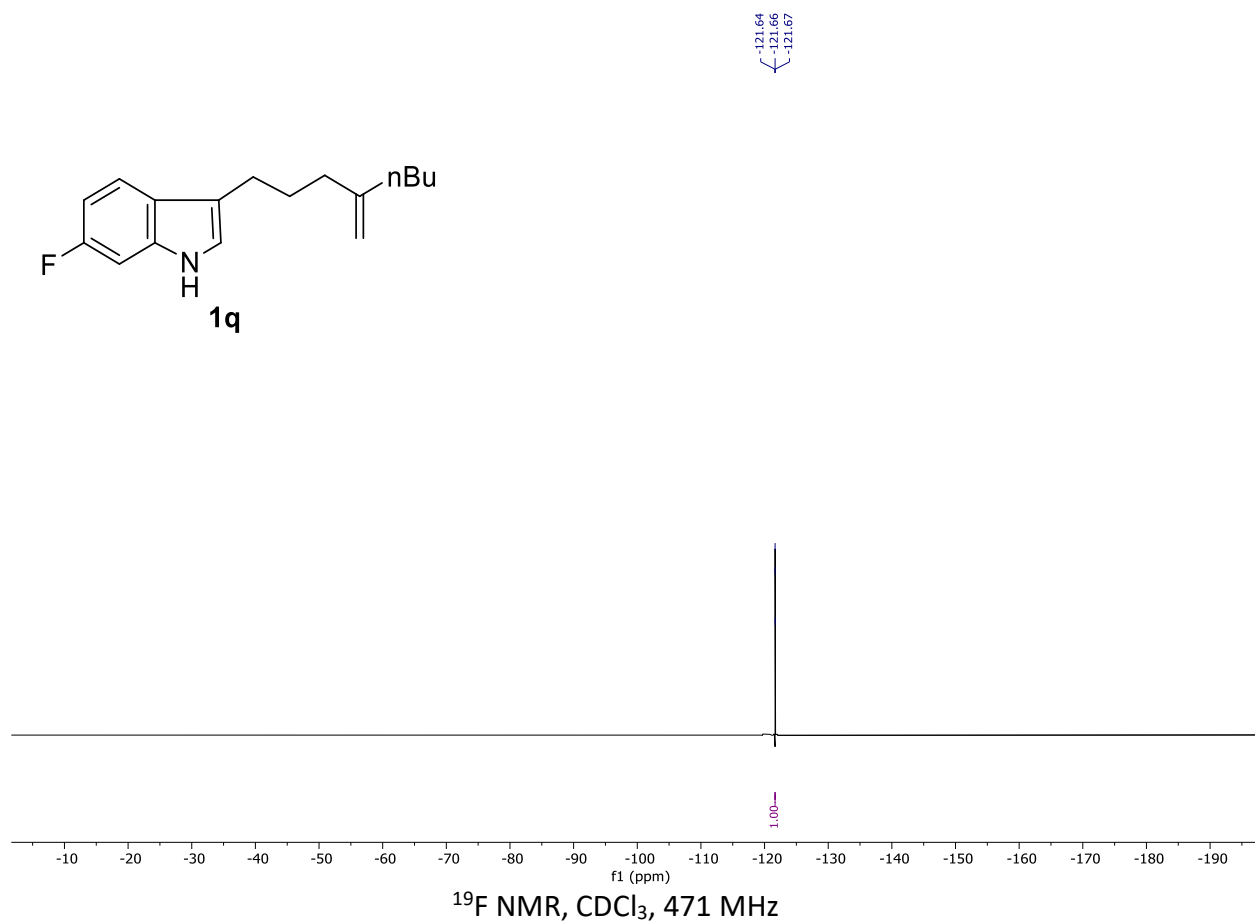

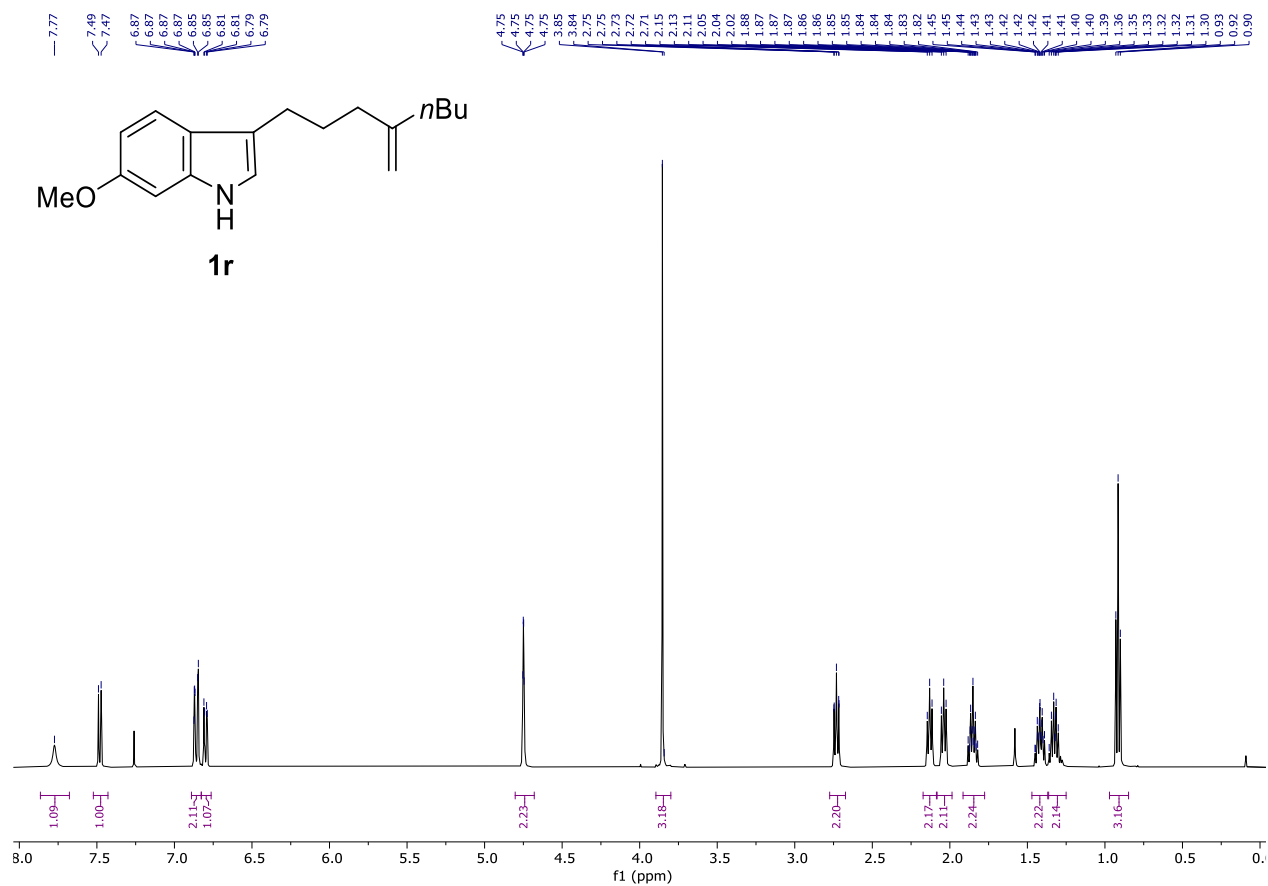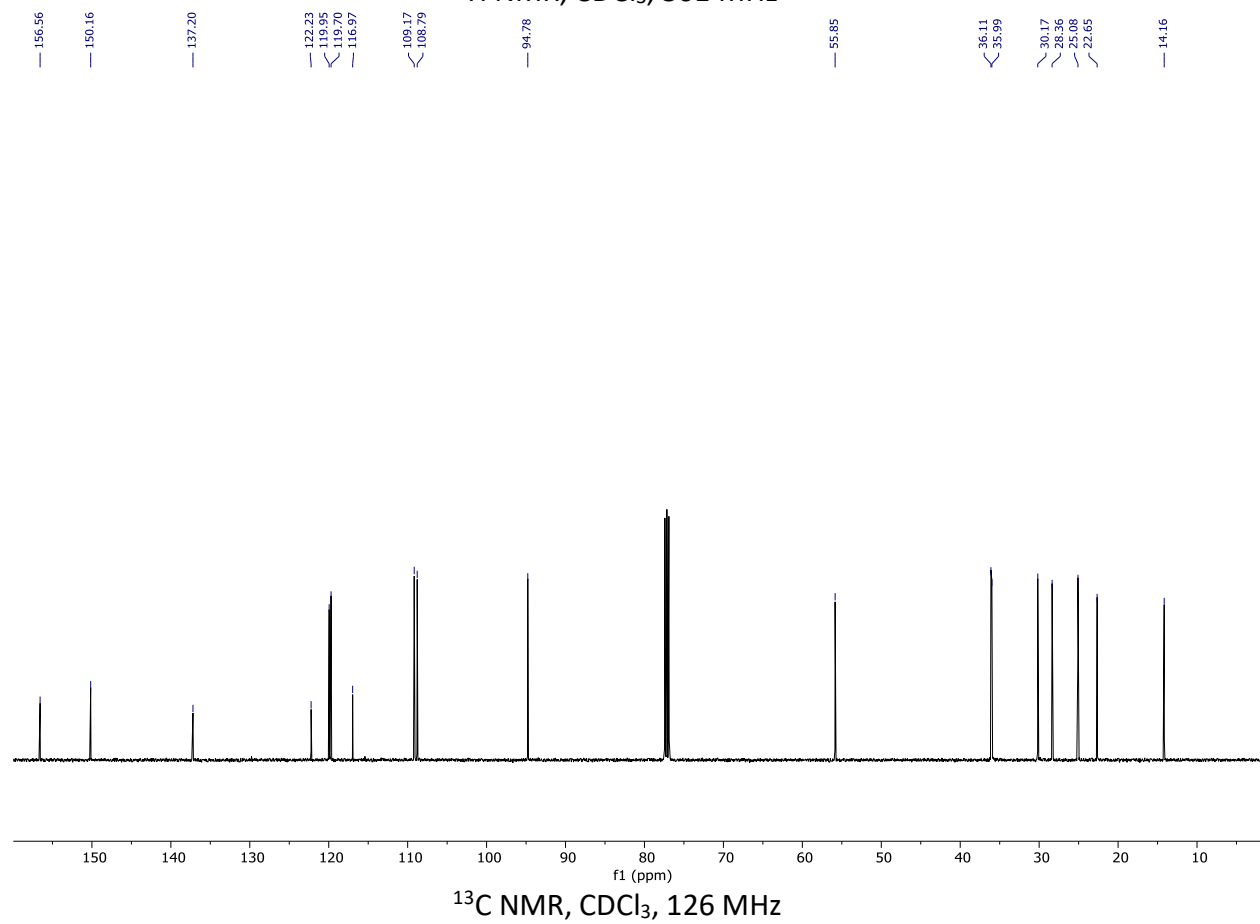

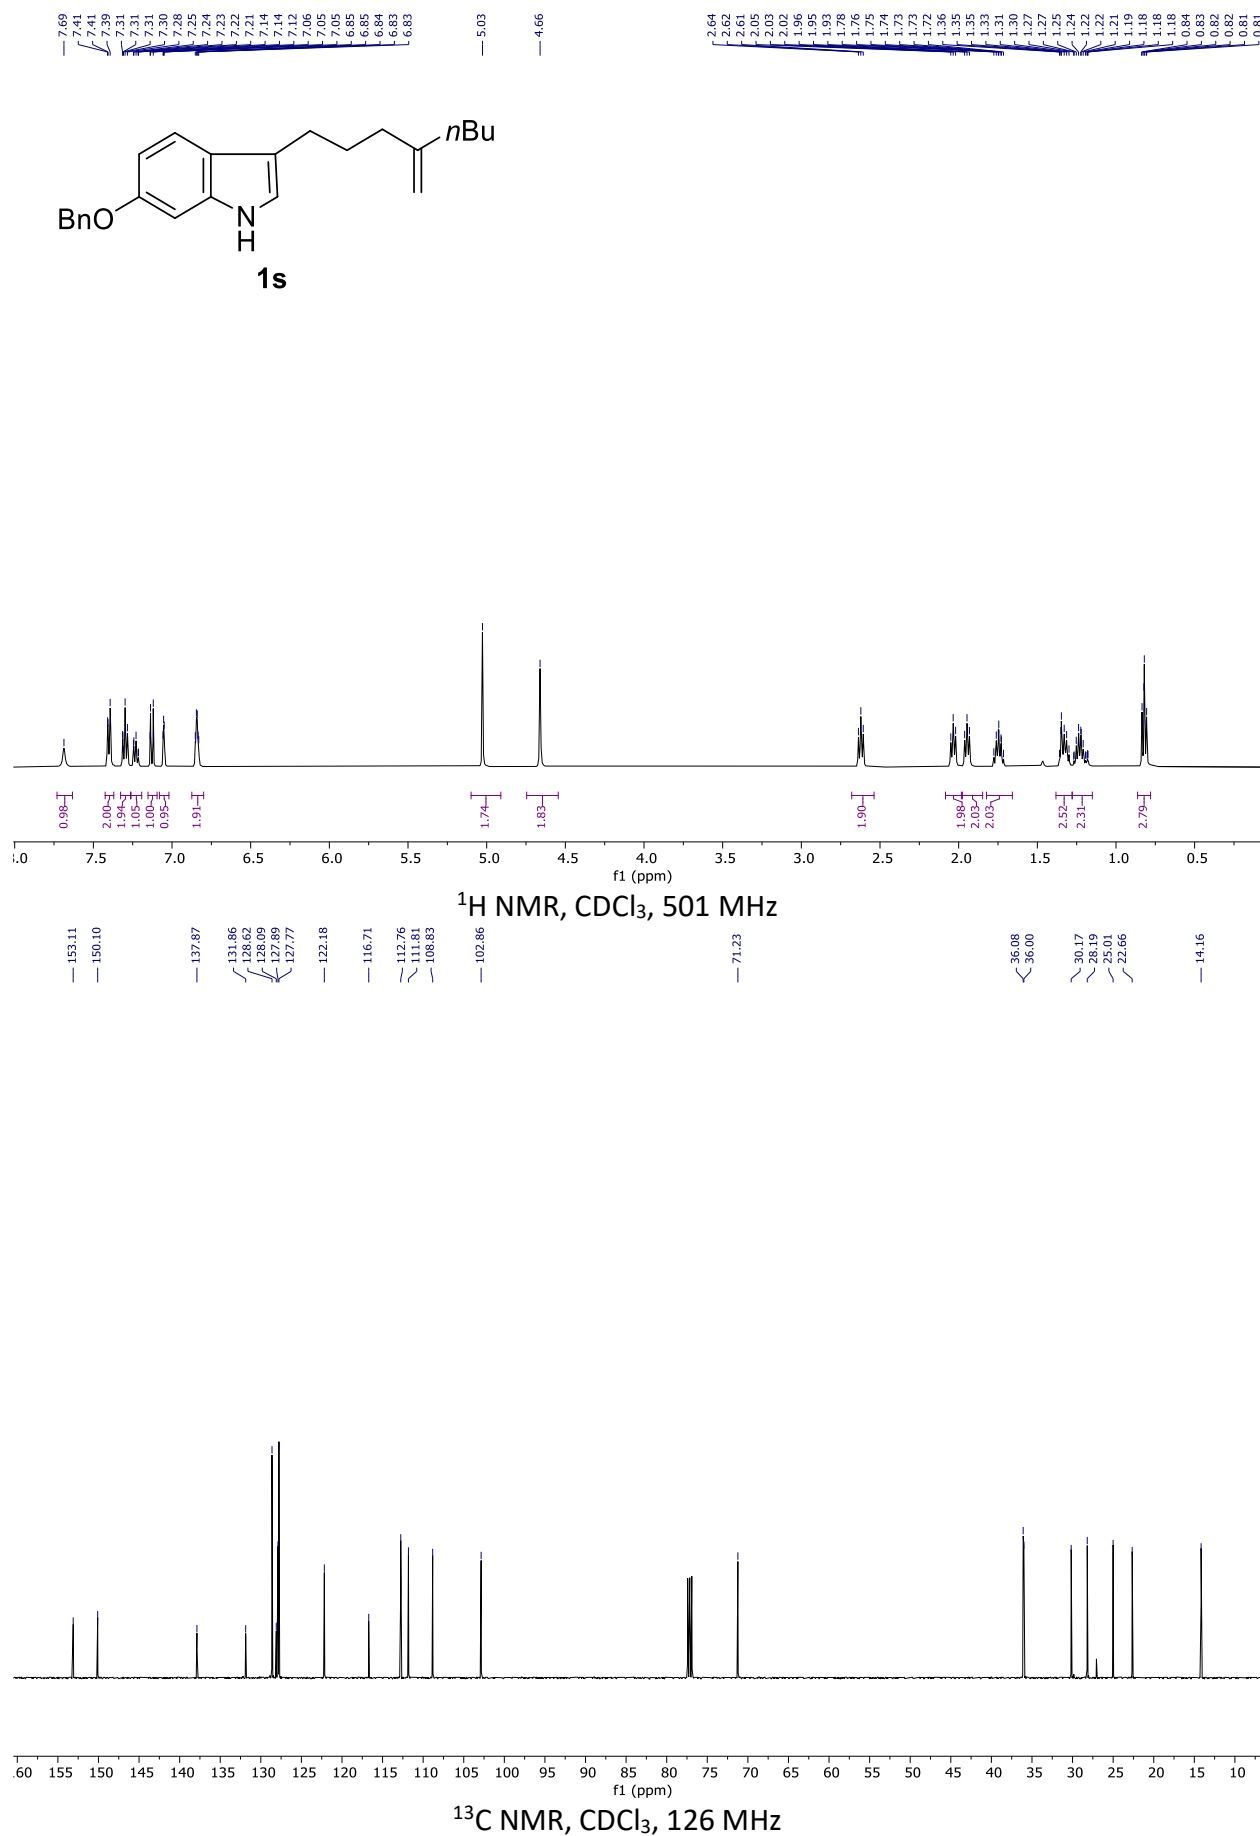

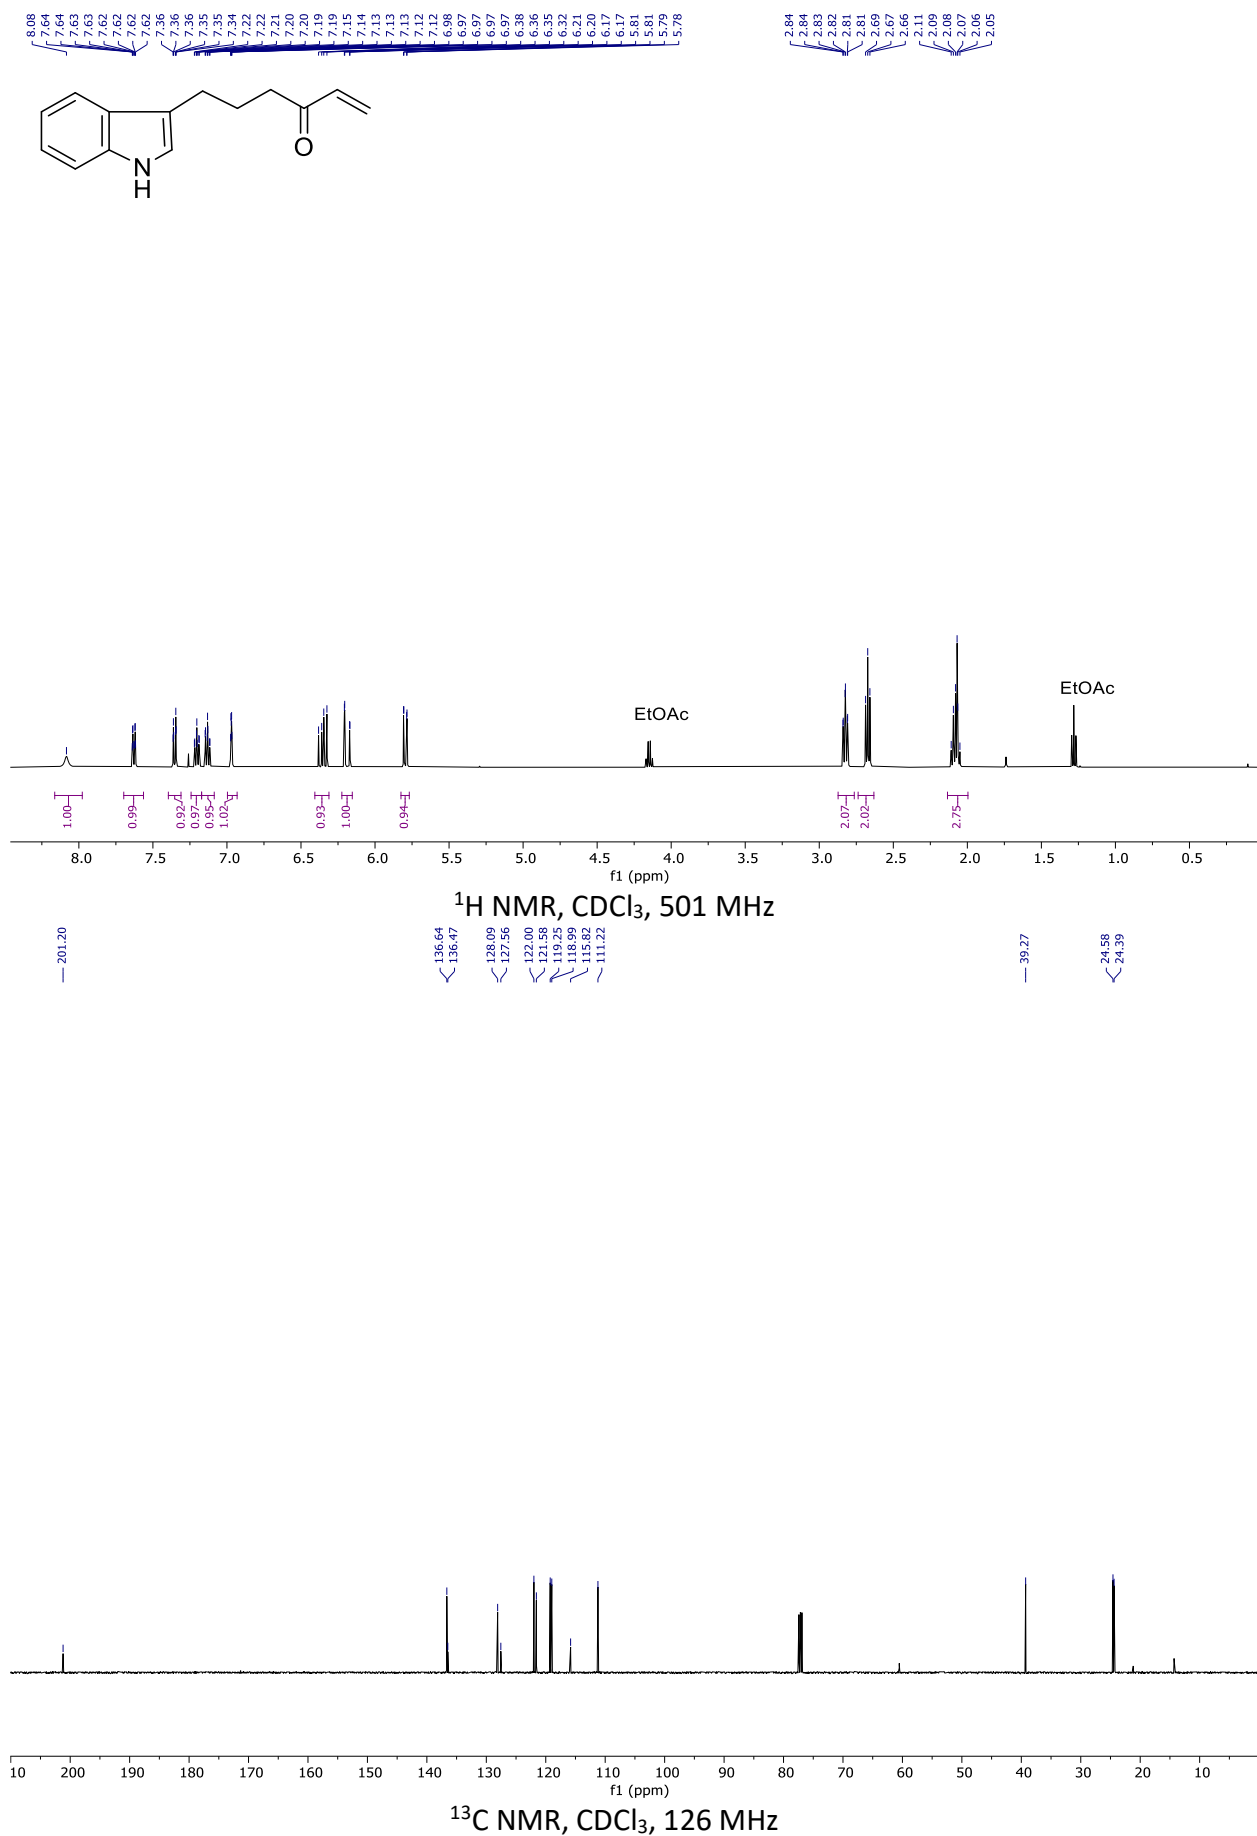

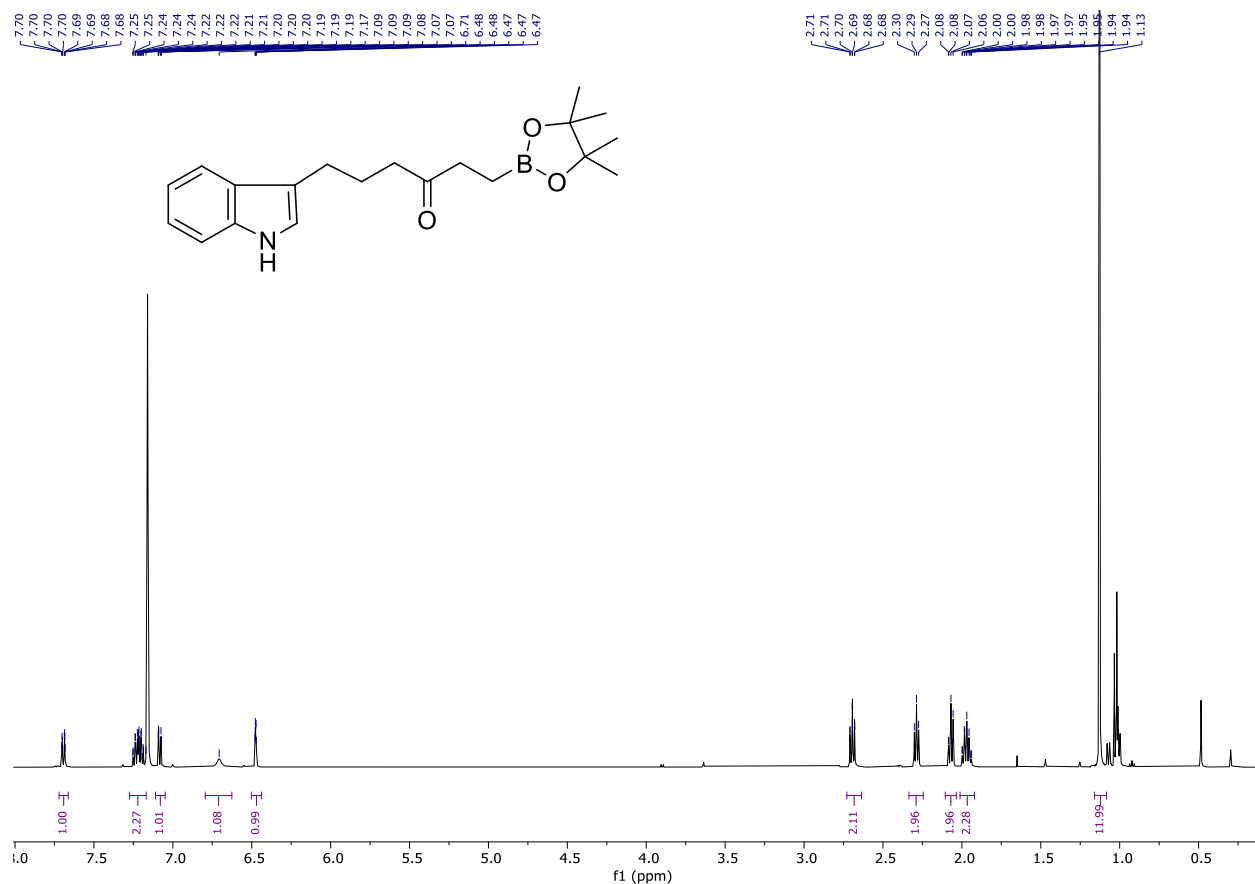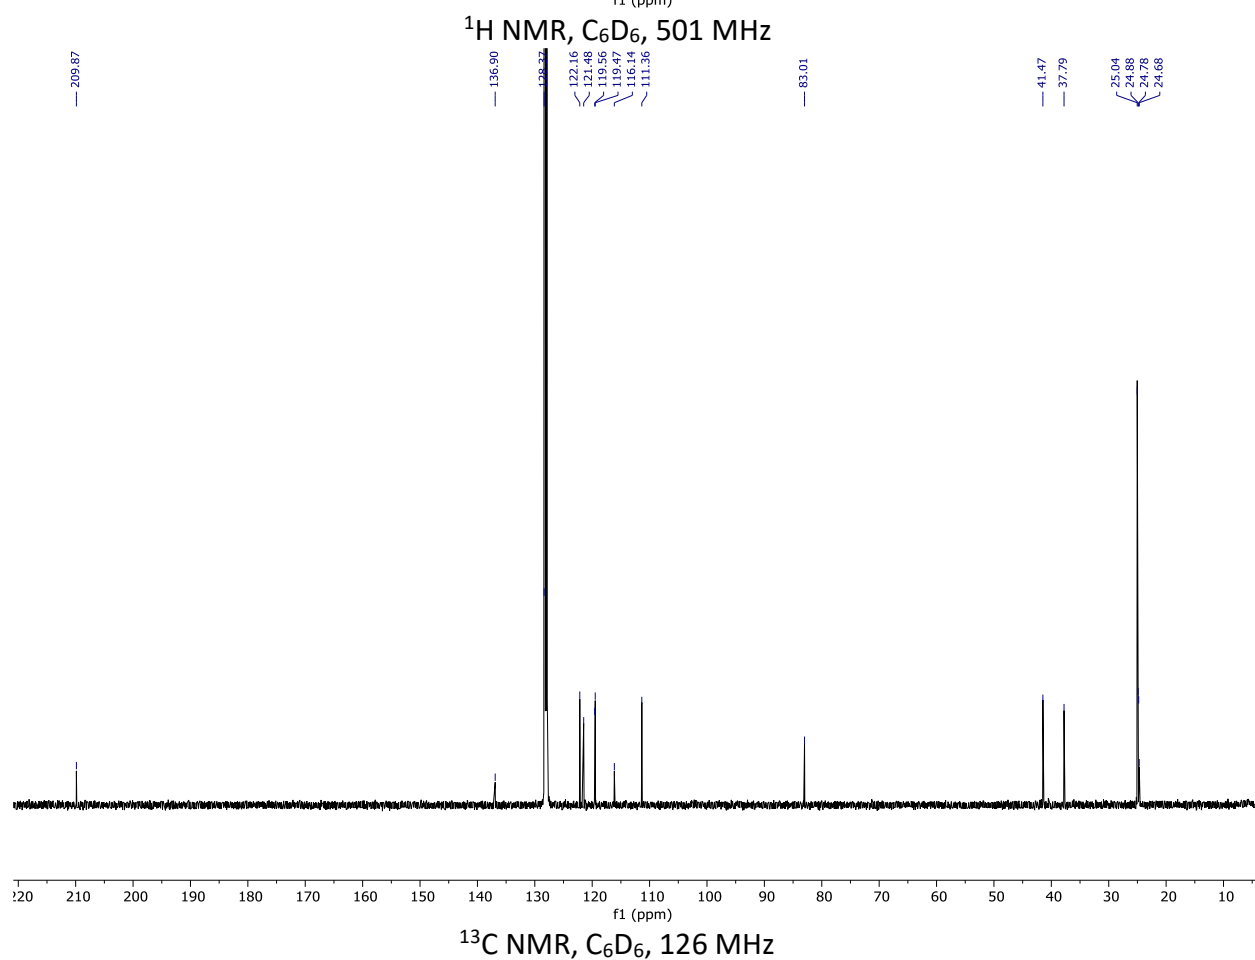

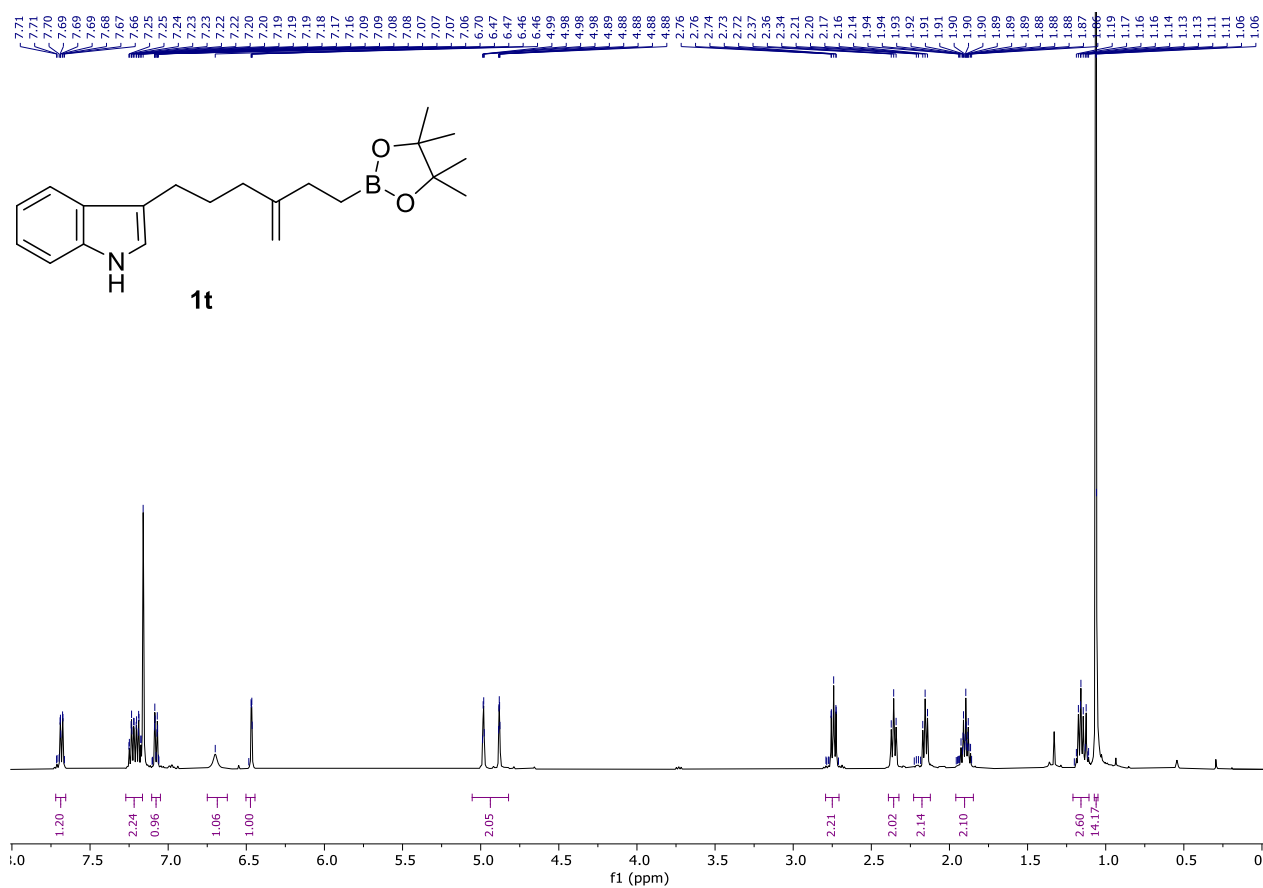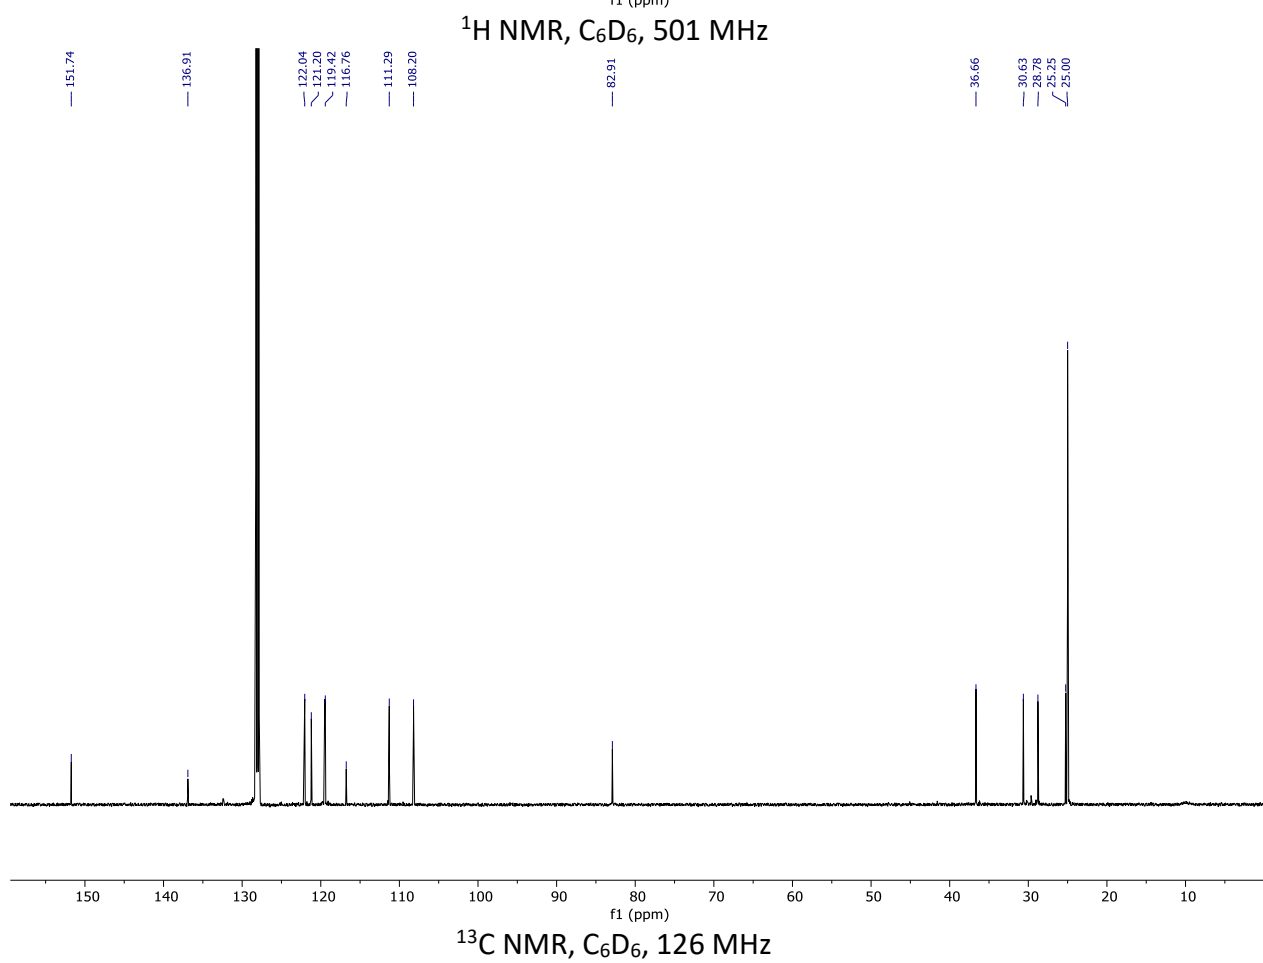

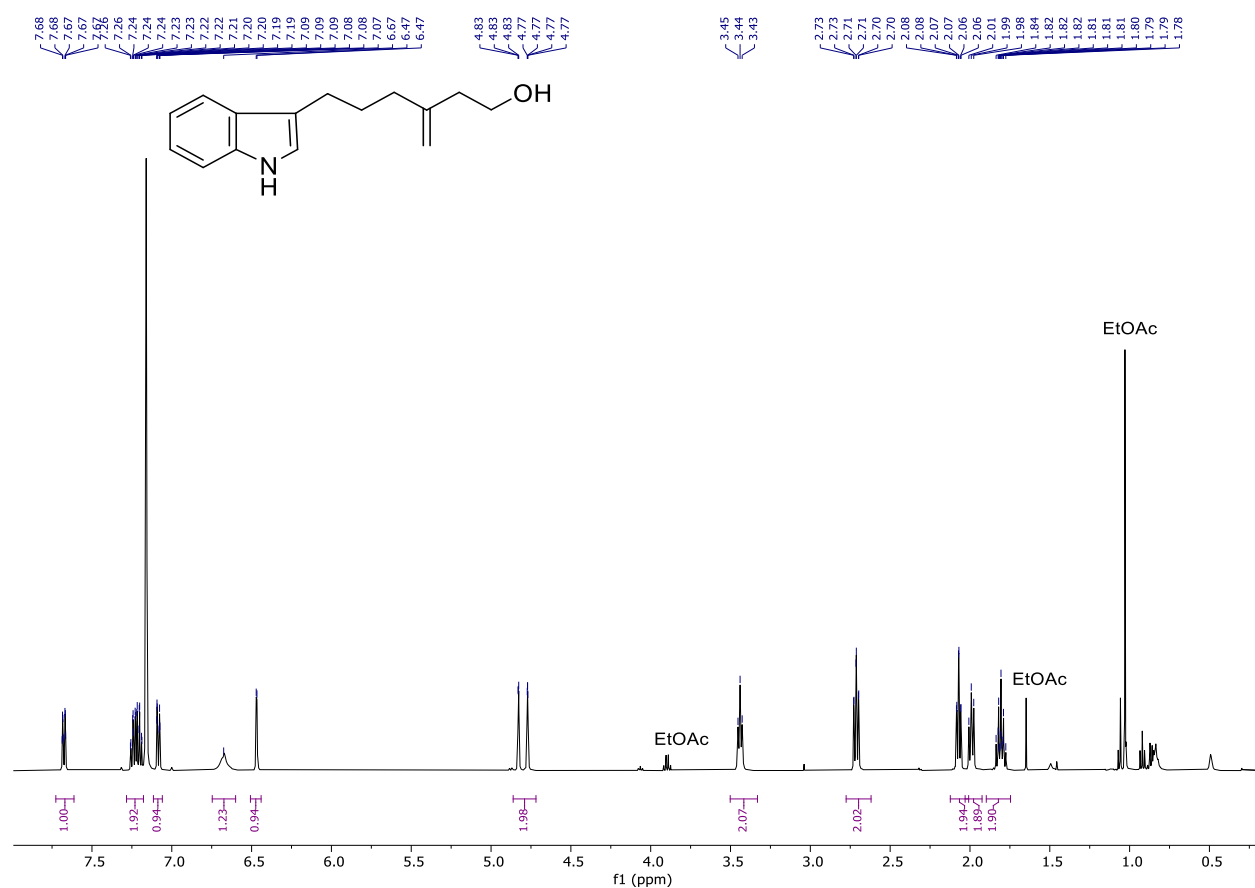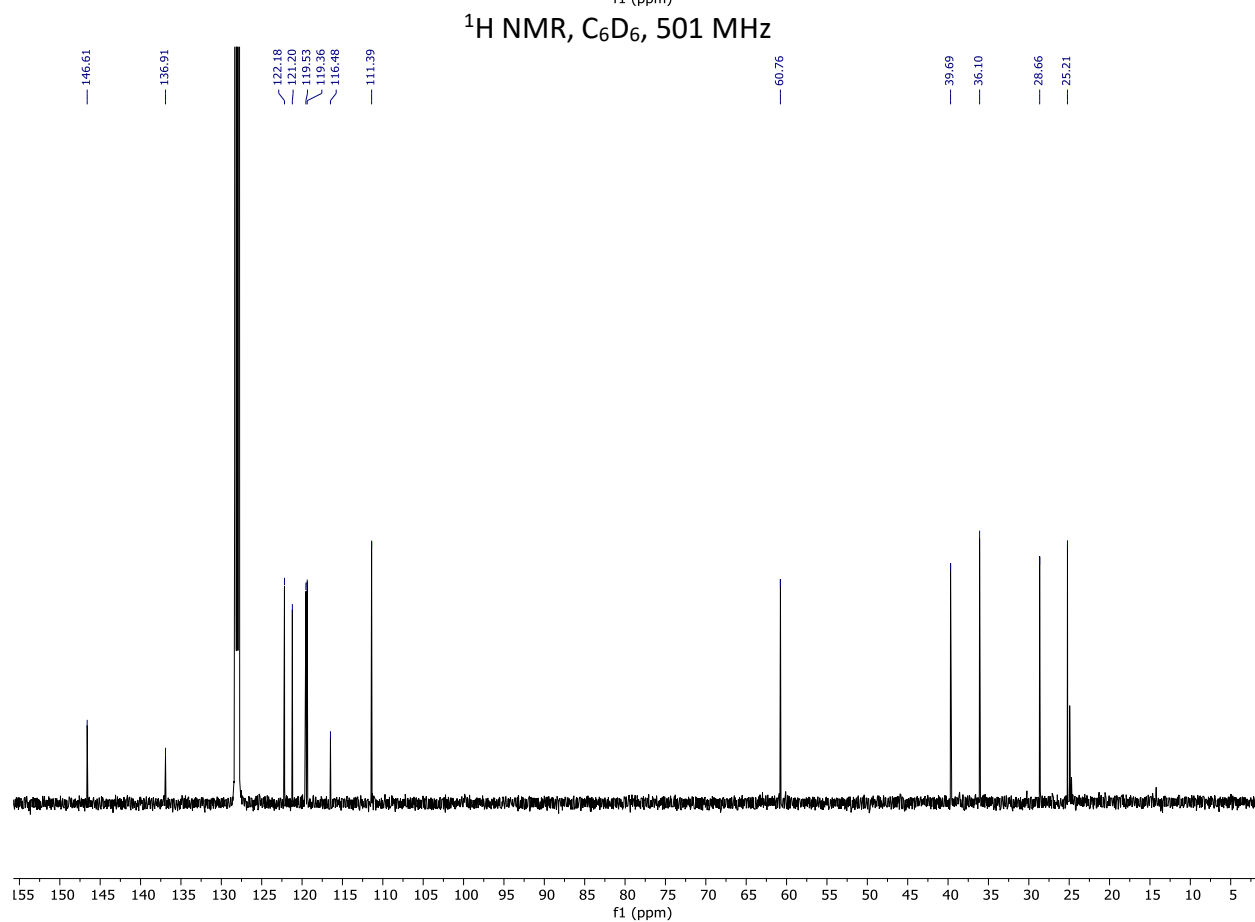

<sup>13</sup>C NMR, C<sub>6</sub>D<sub>6</sub>, 126 MHz

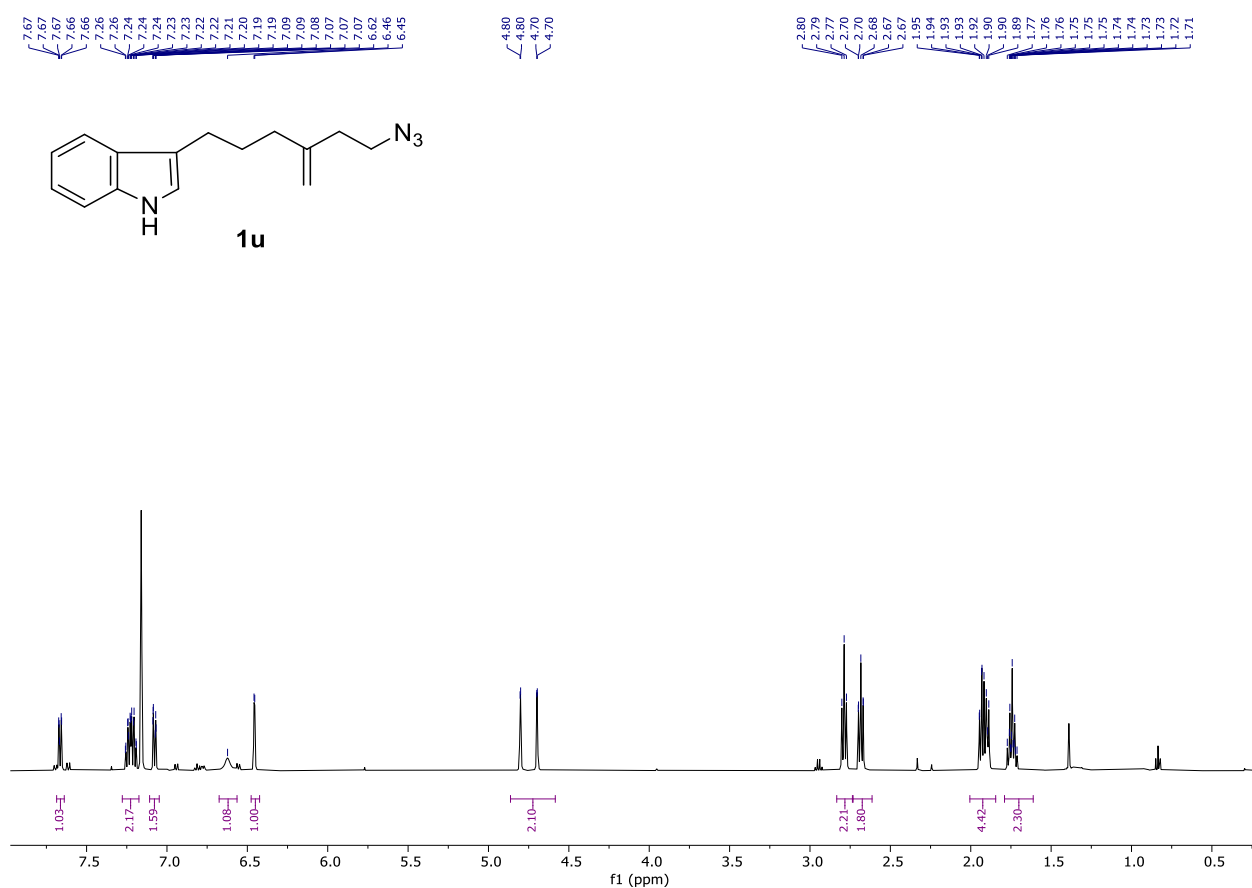

$^1\text{H}$  NMR,  $\text{C}_6\text{D}_6$ , 501 MHz

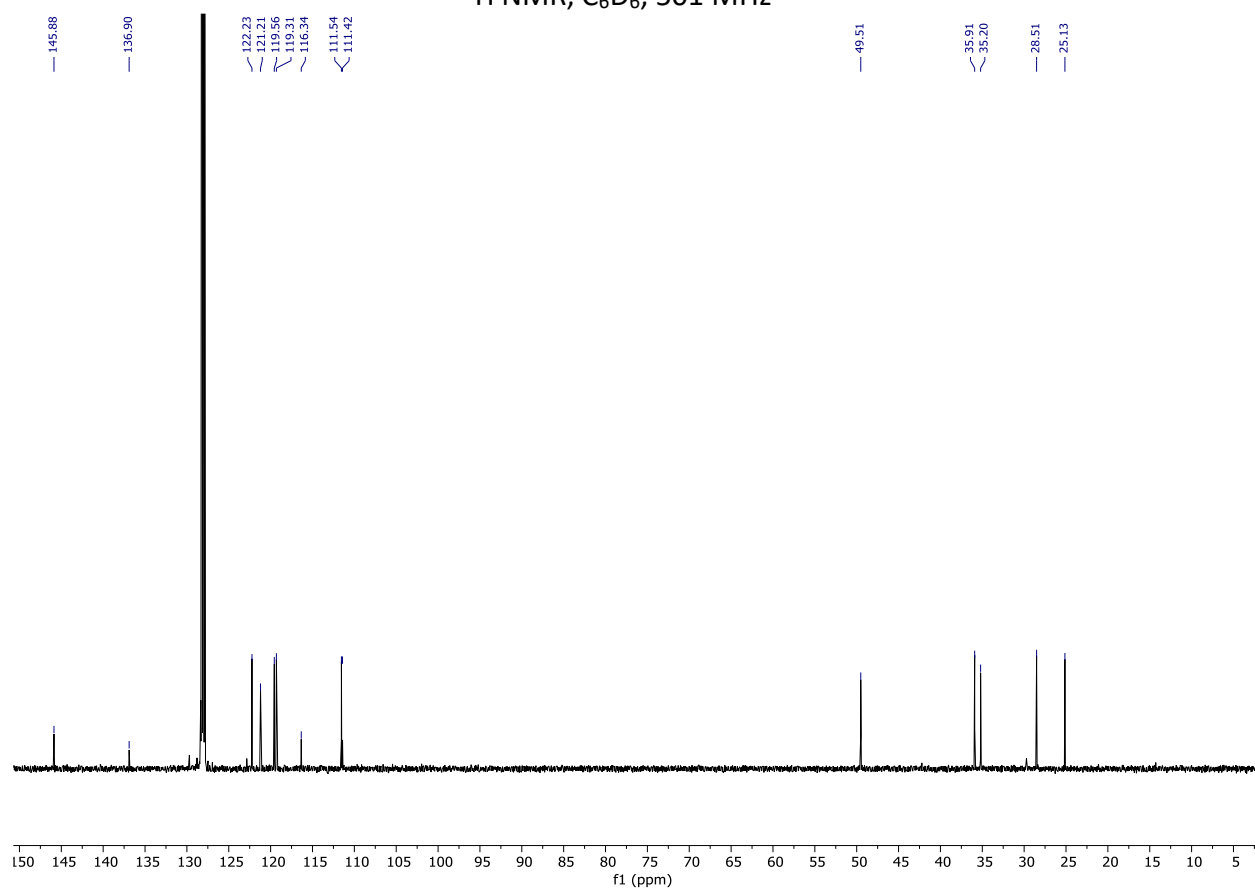

$^{13}\text{C}$  NMR,  $\text{C}_6\text{D}_6$ , 126 MHz

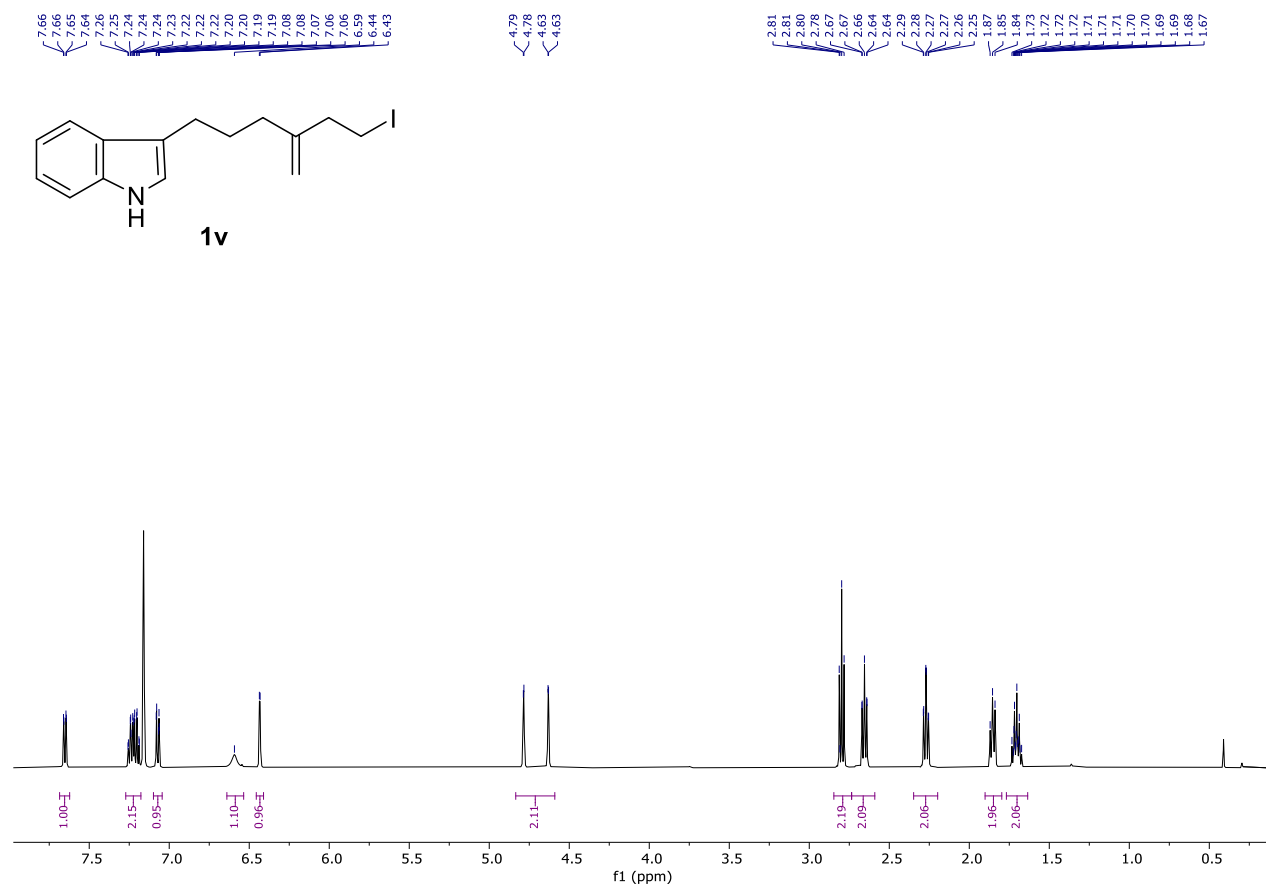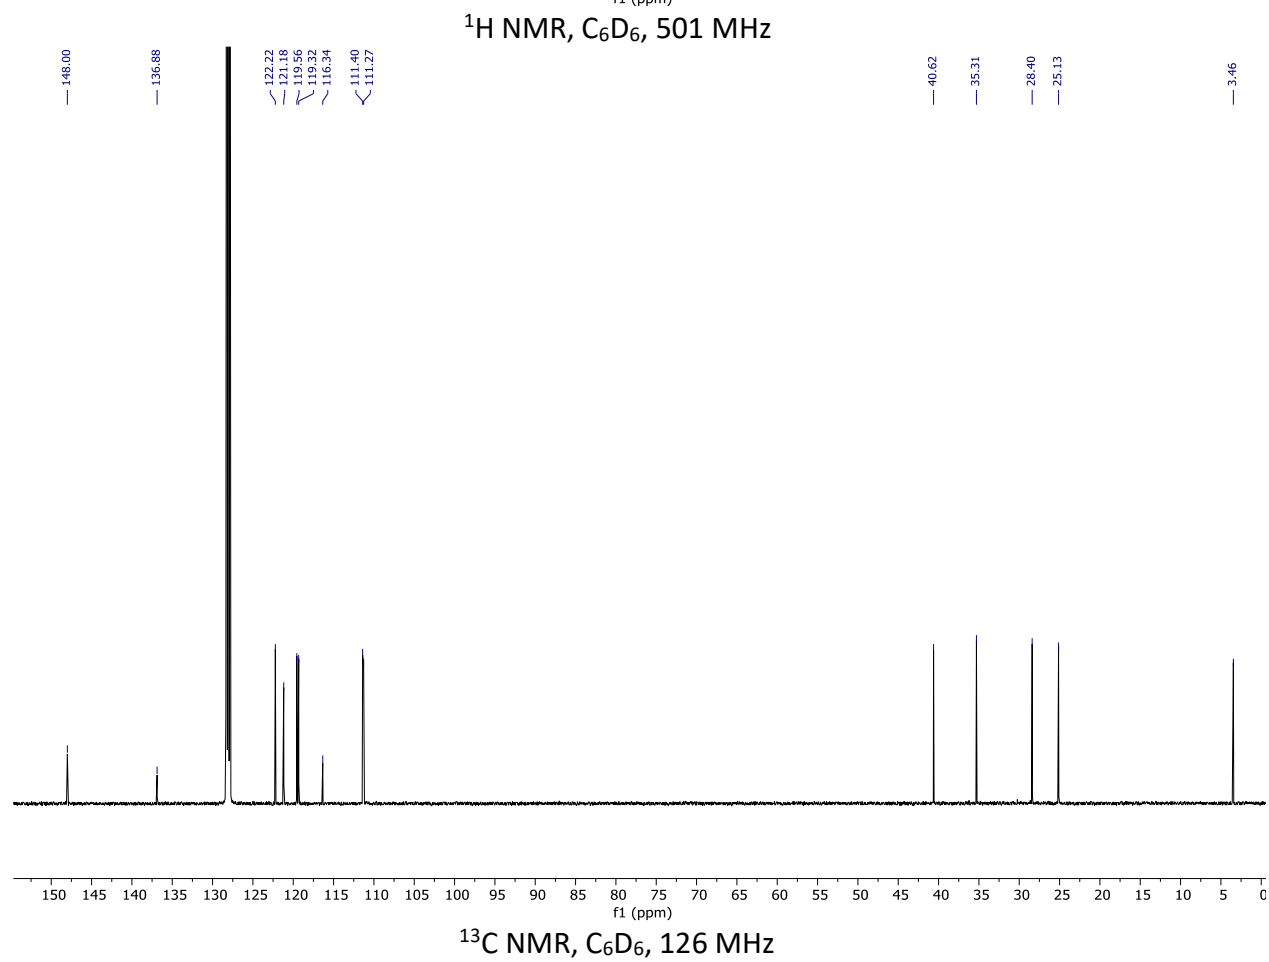

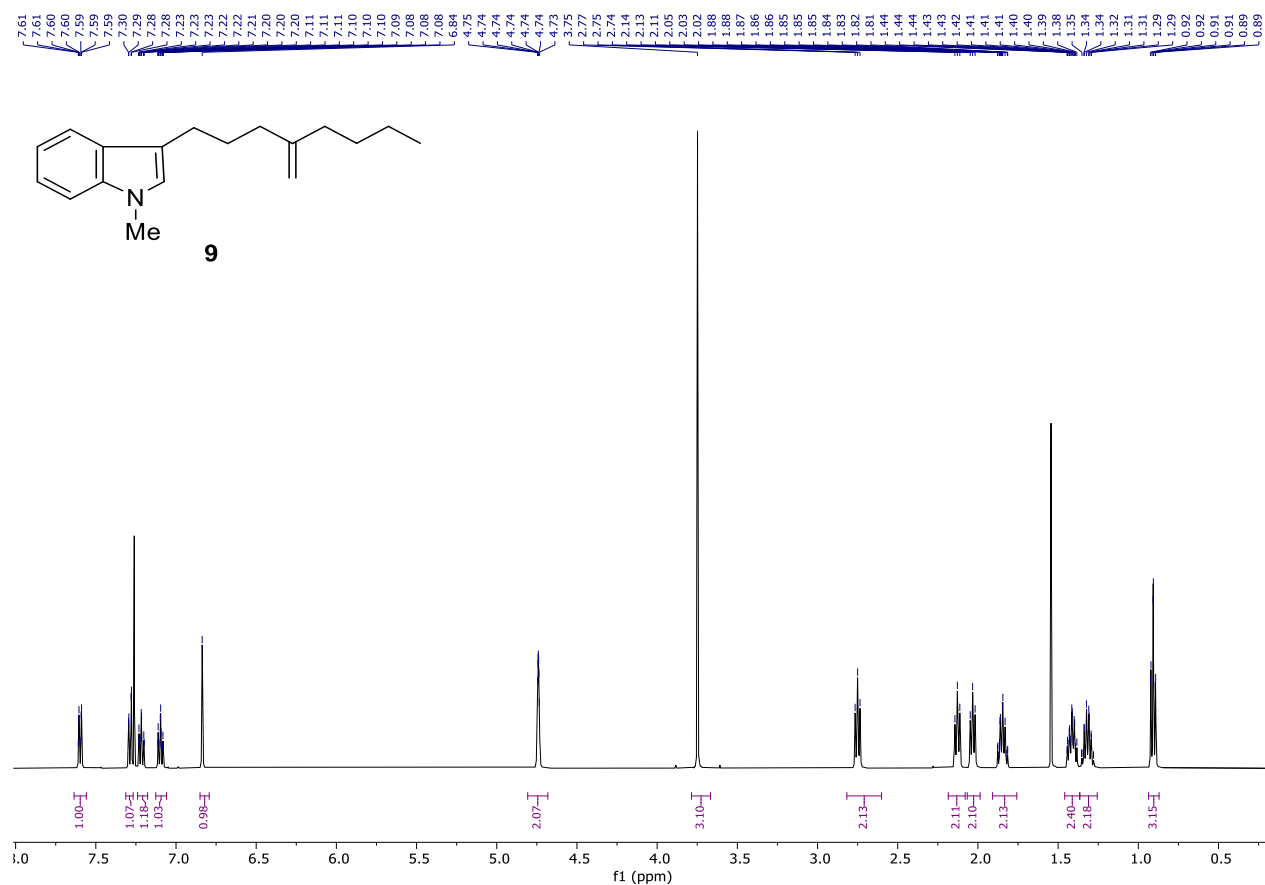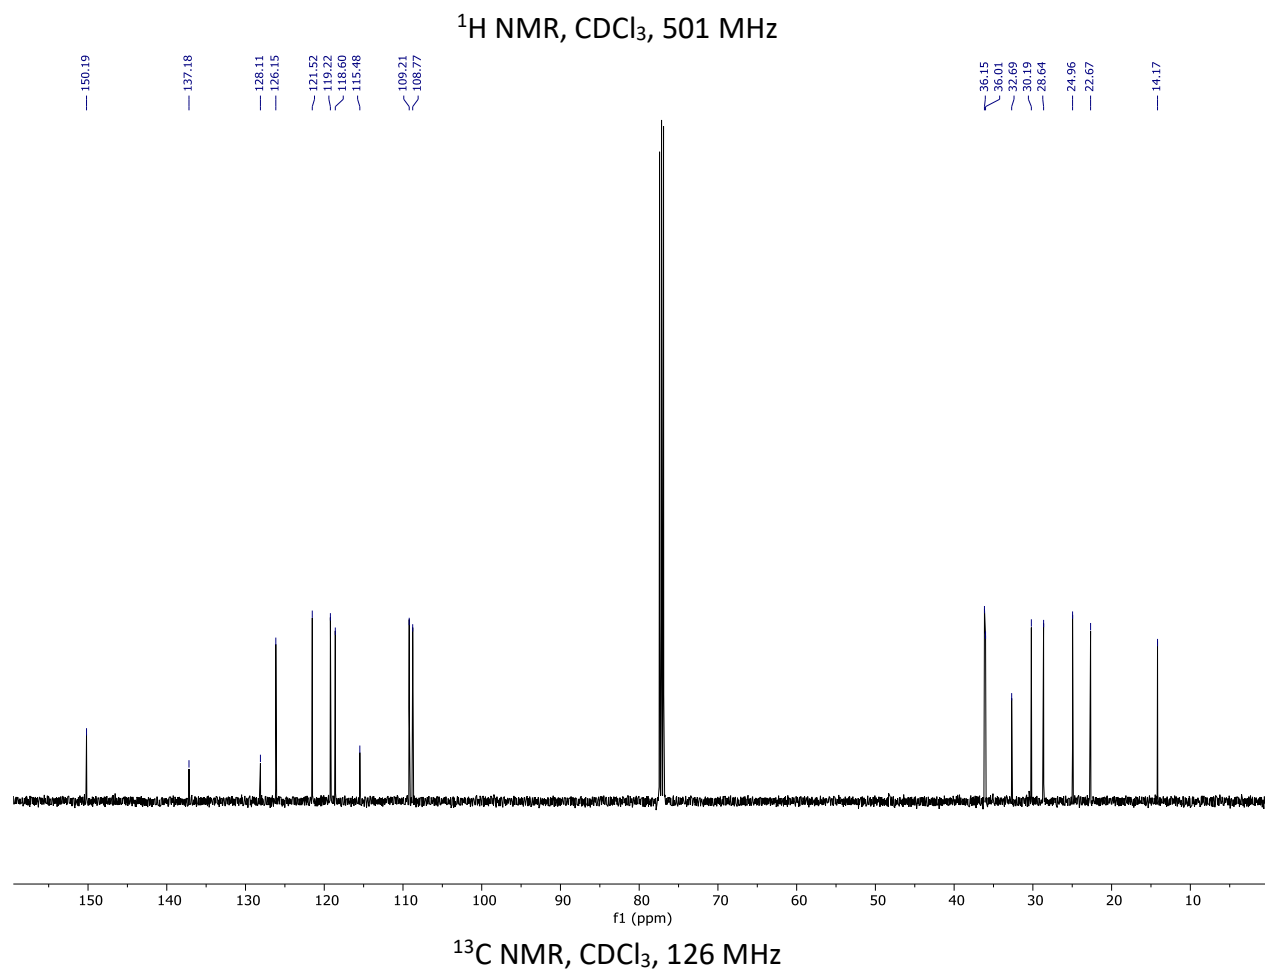

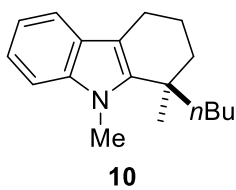<sup>1</sup>H NMR, CDCl<sub>3</sub>, 501 MHz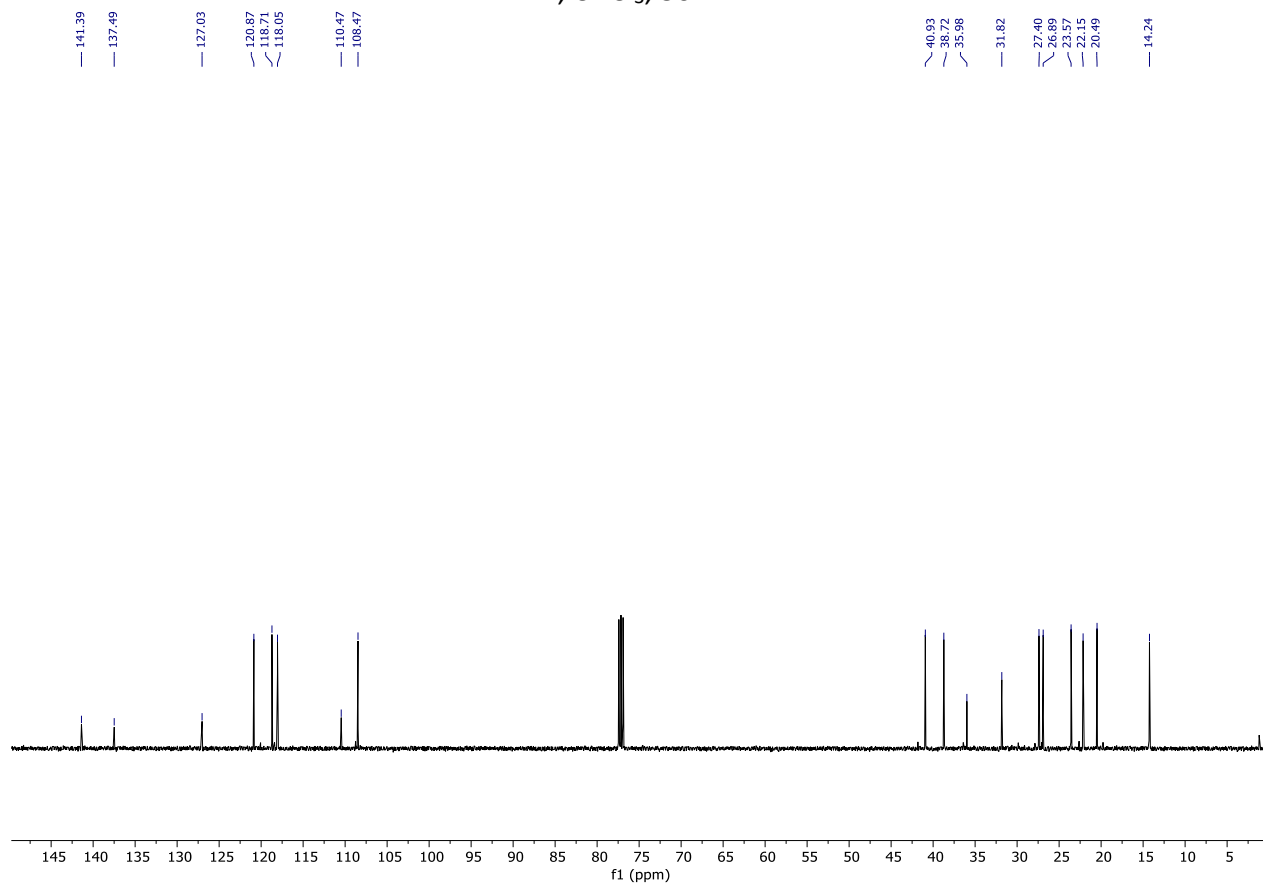<sup>13</sup>C NMR, CDCl<sub>3</sub>, 126 MHz

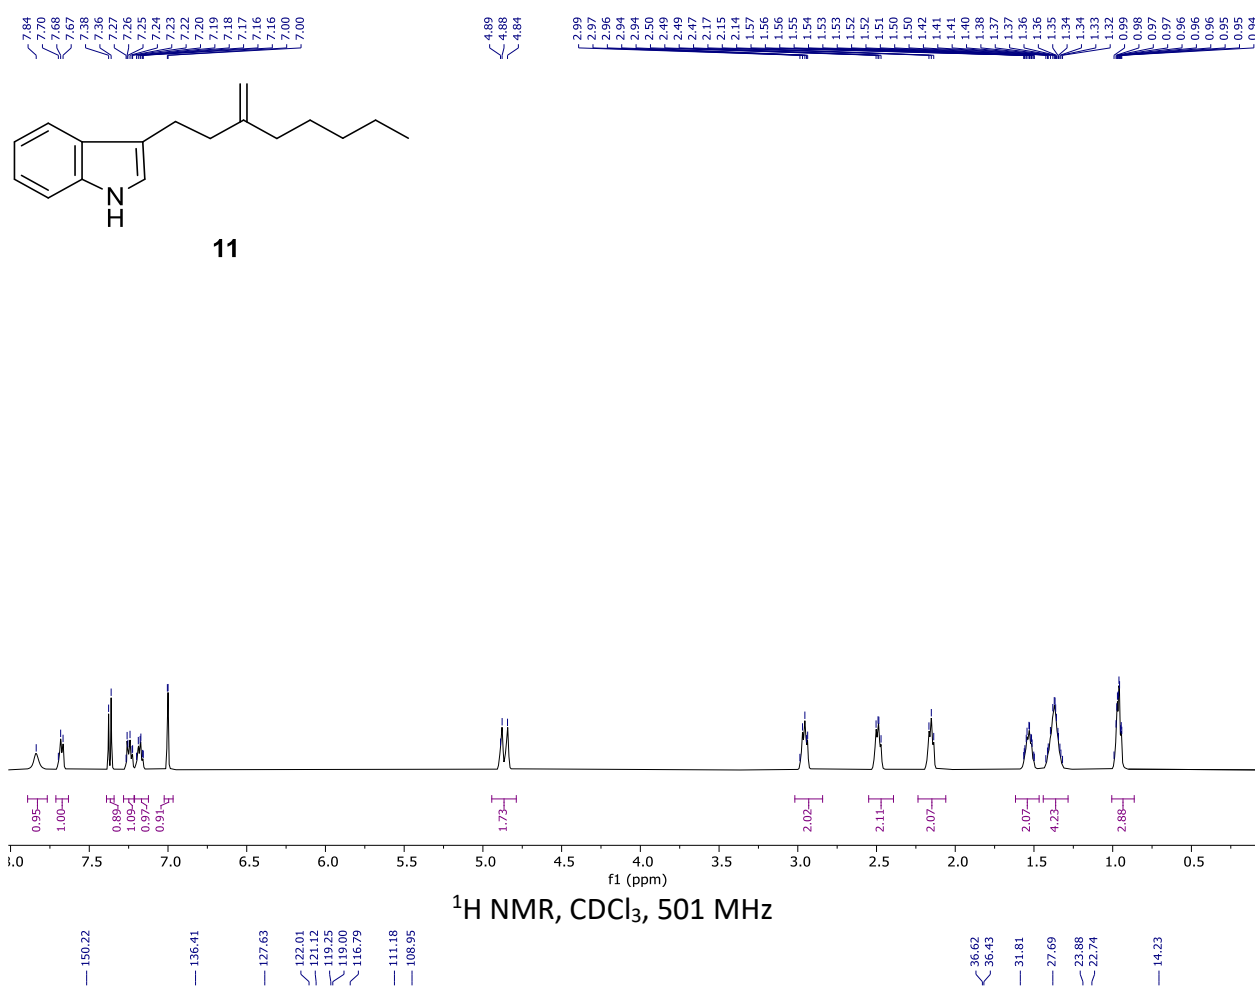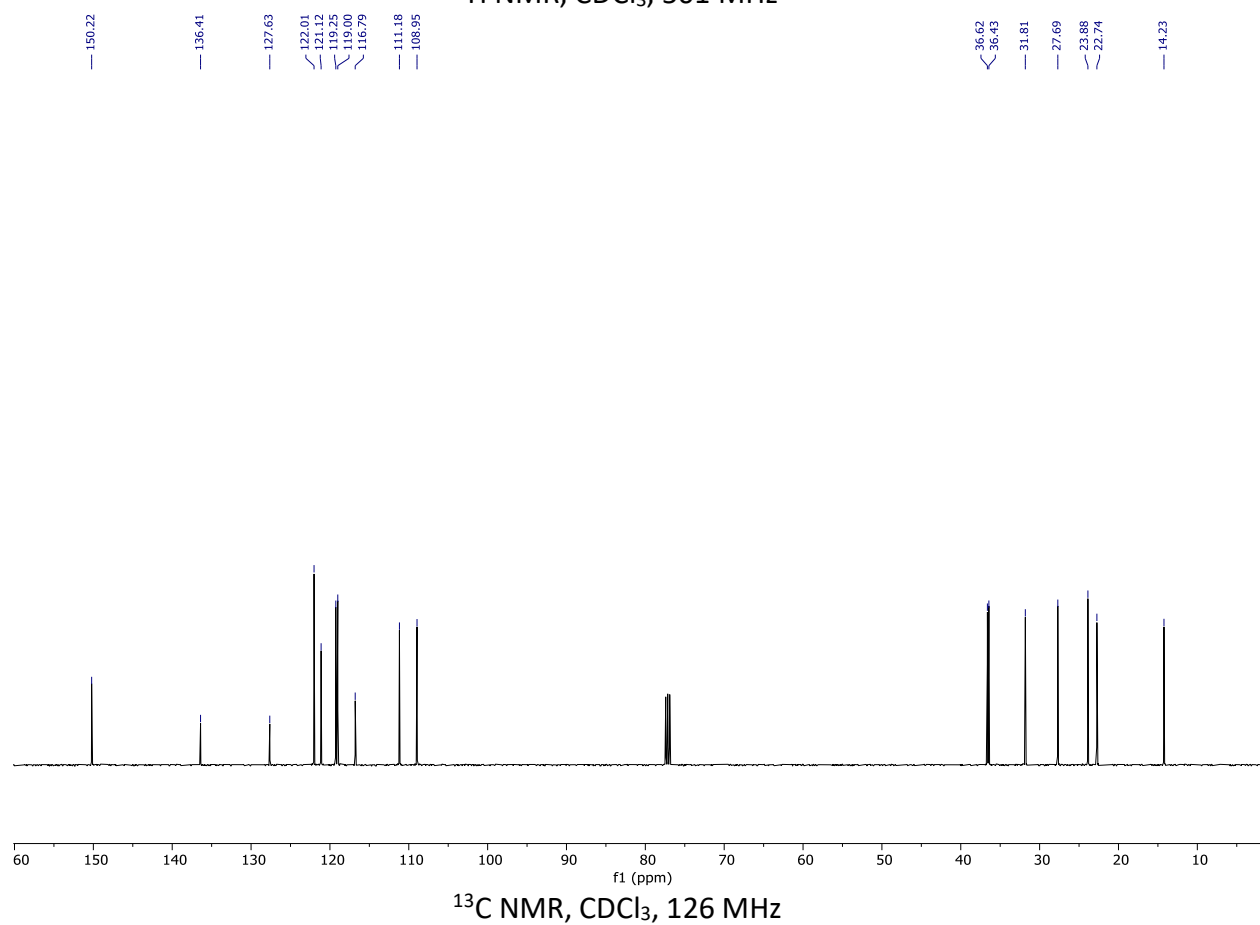

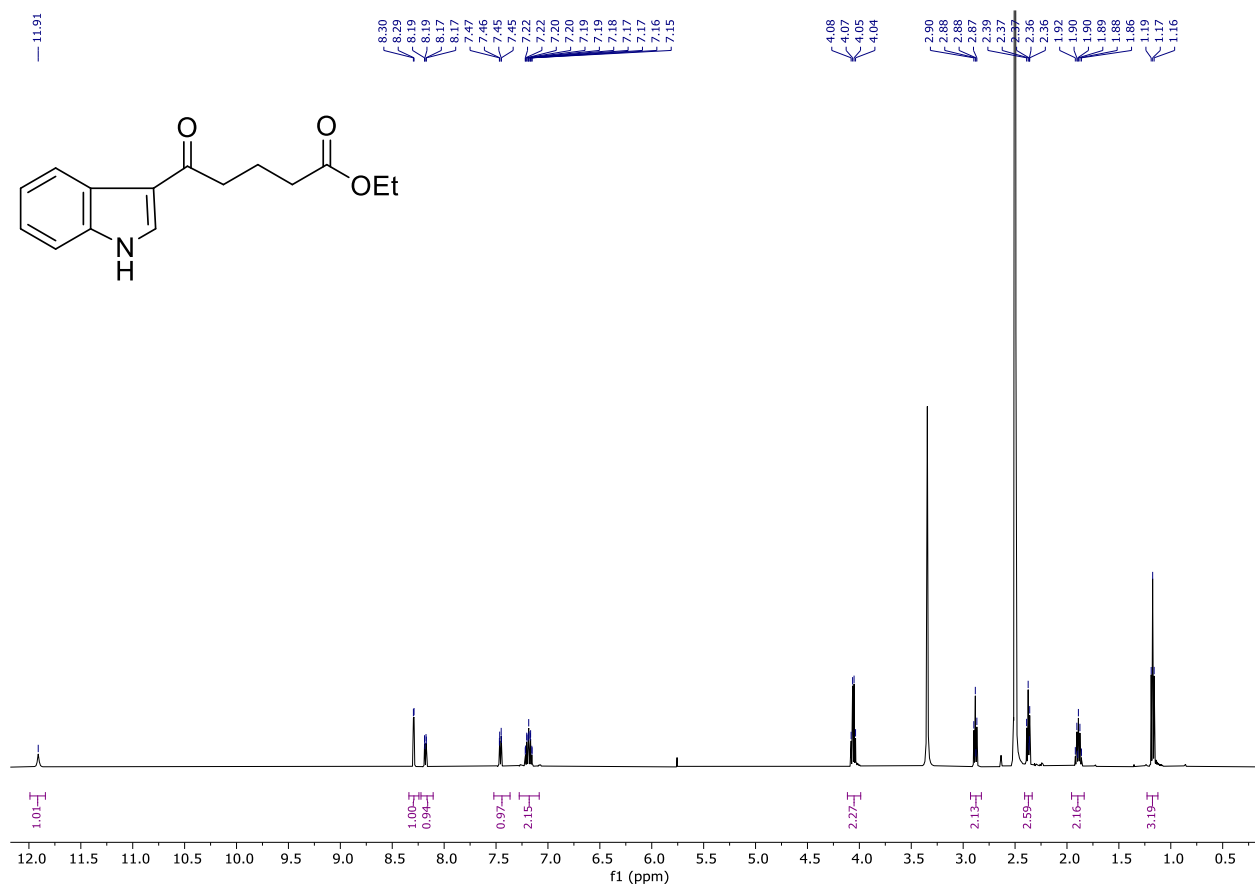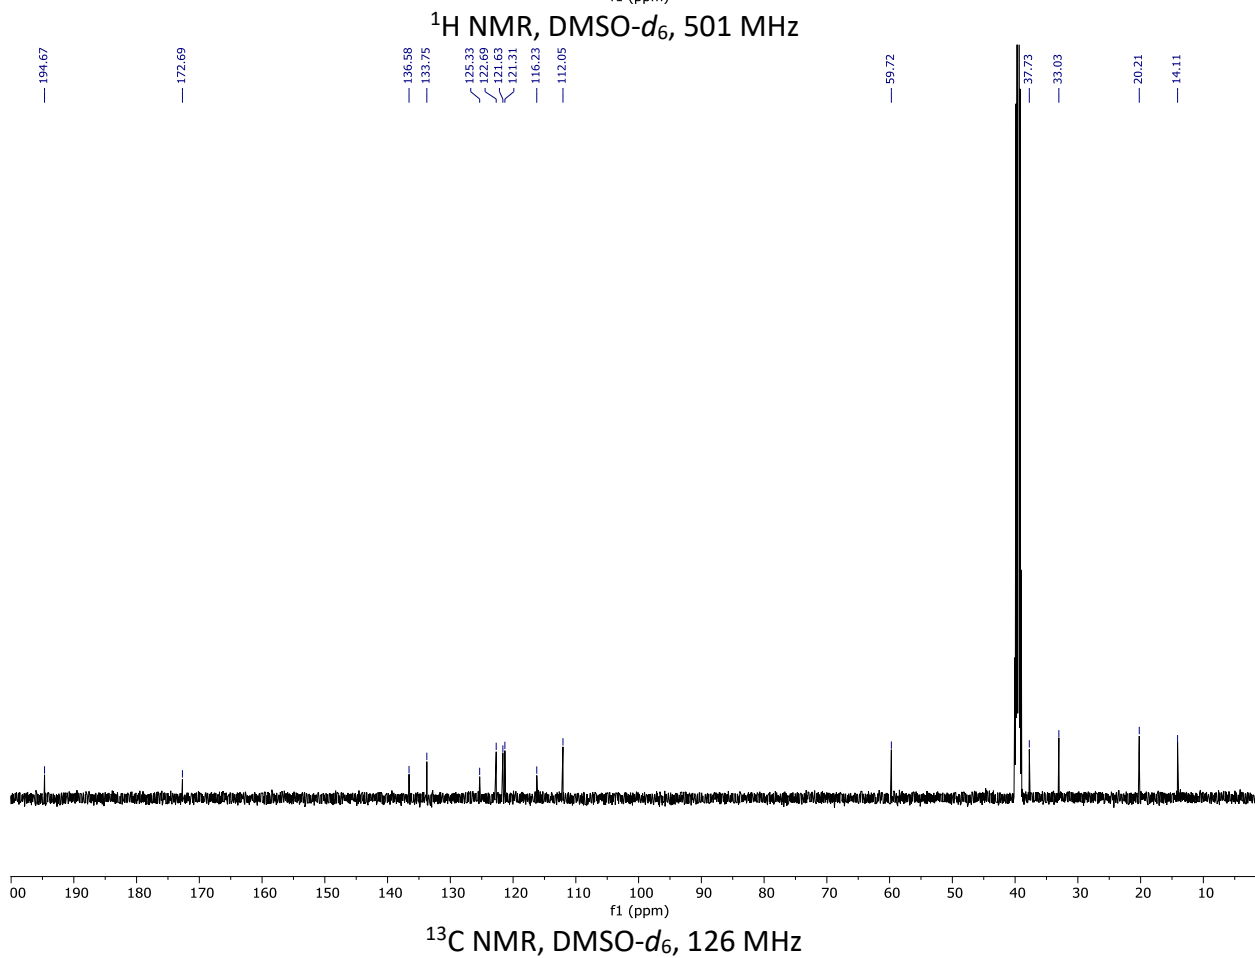

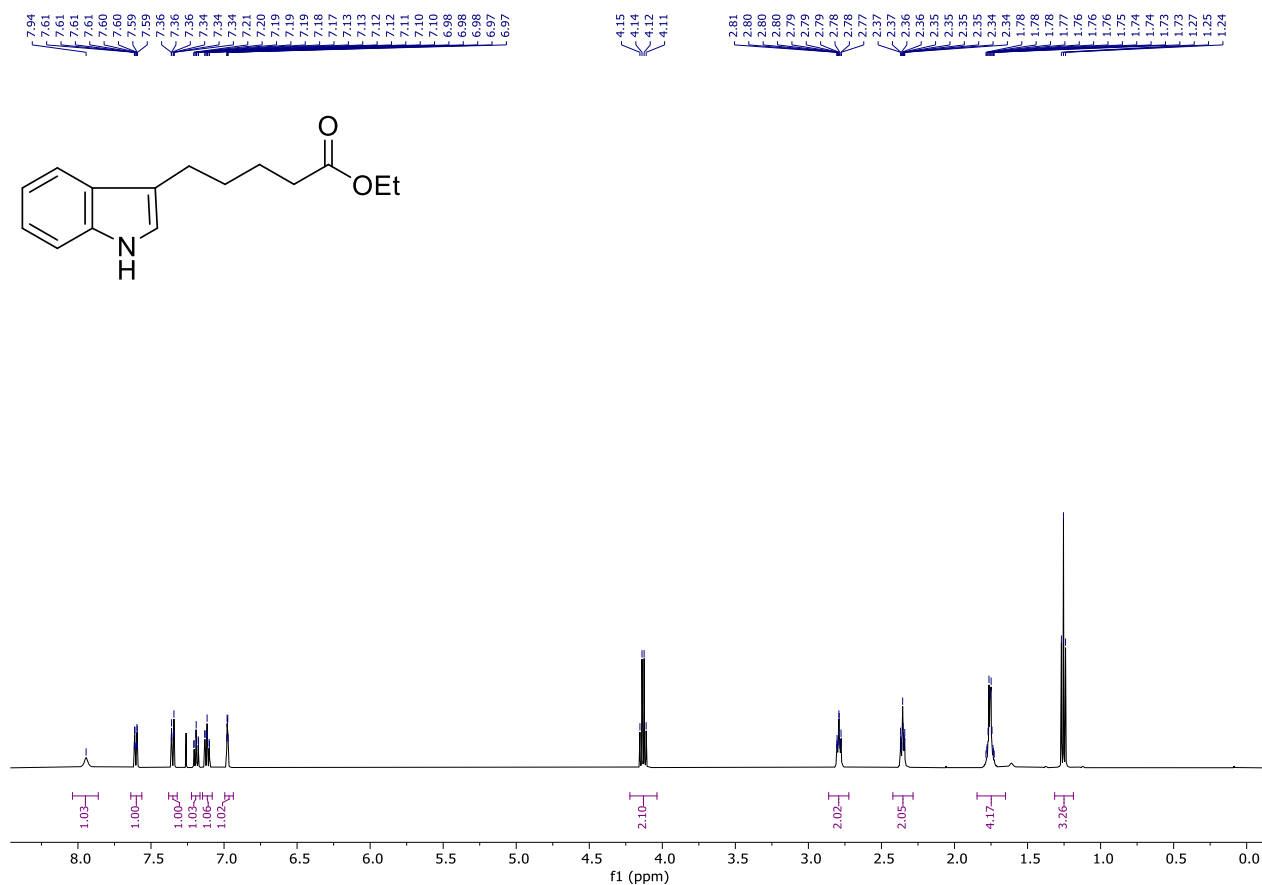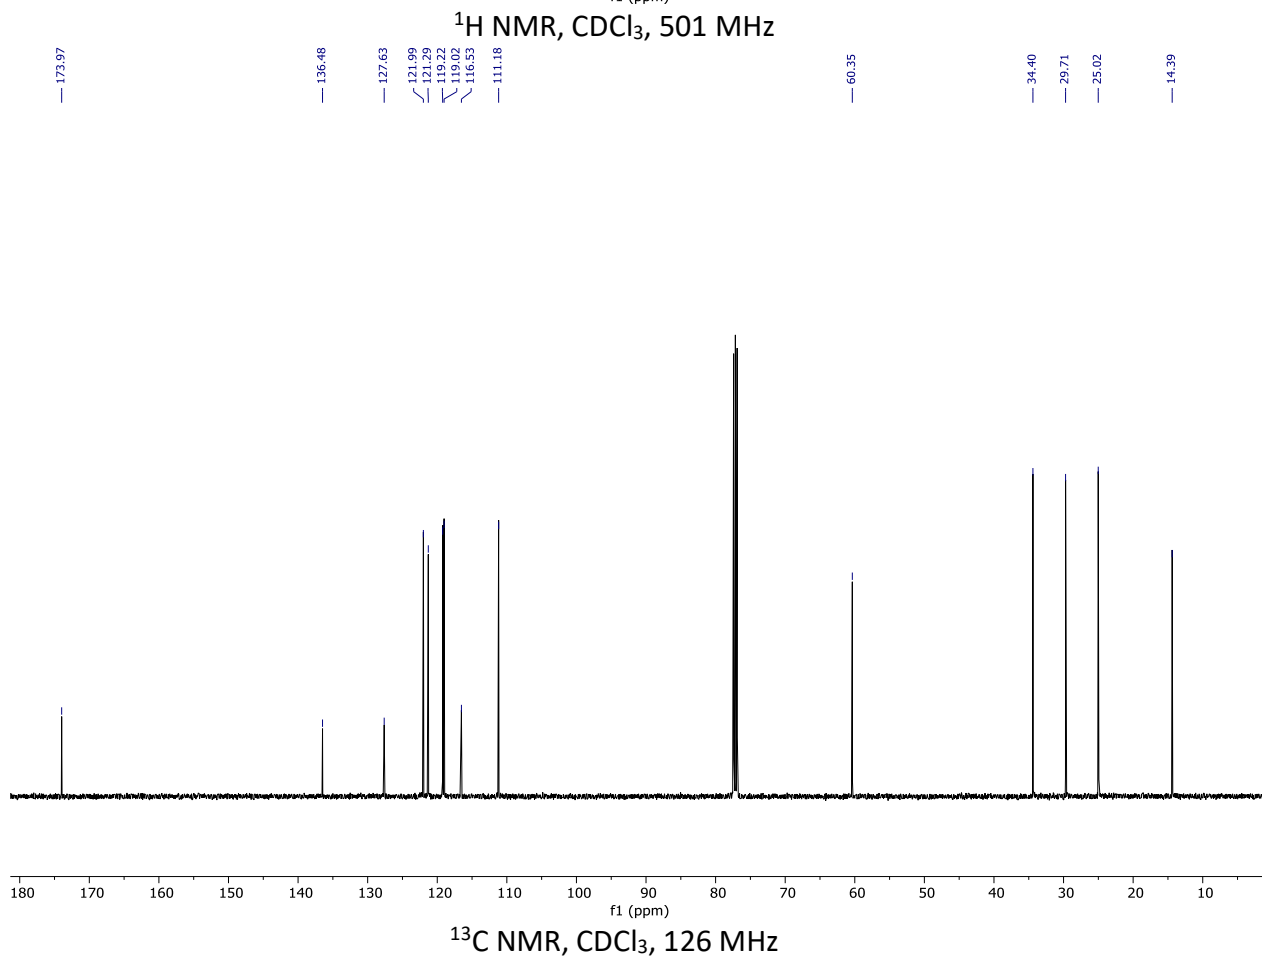

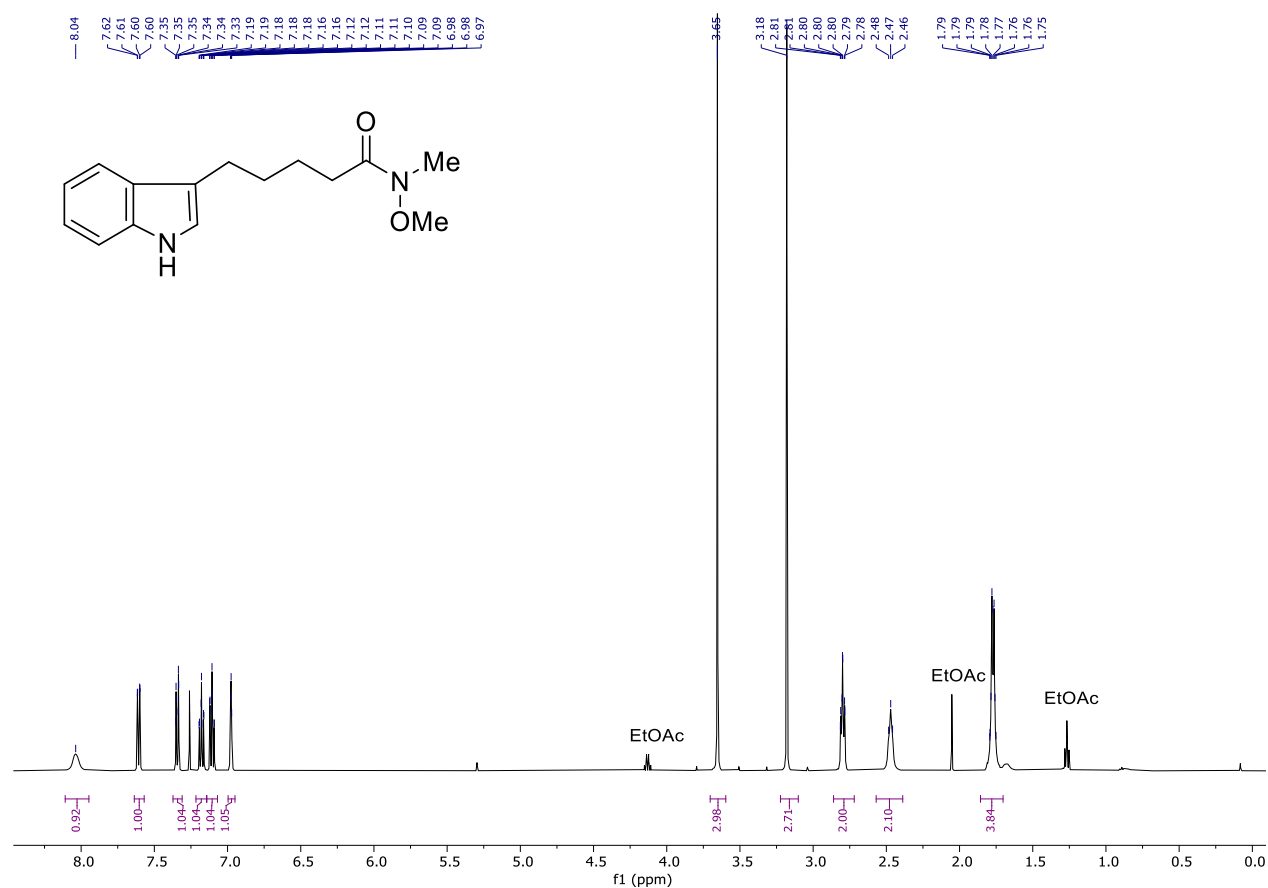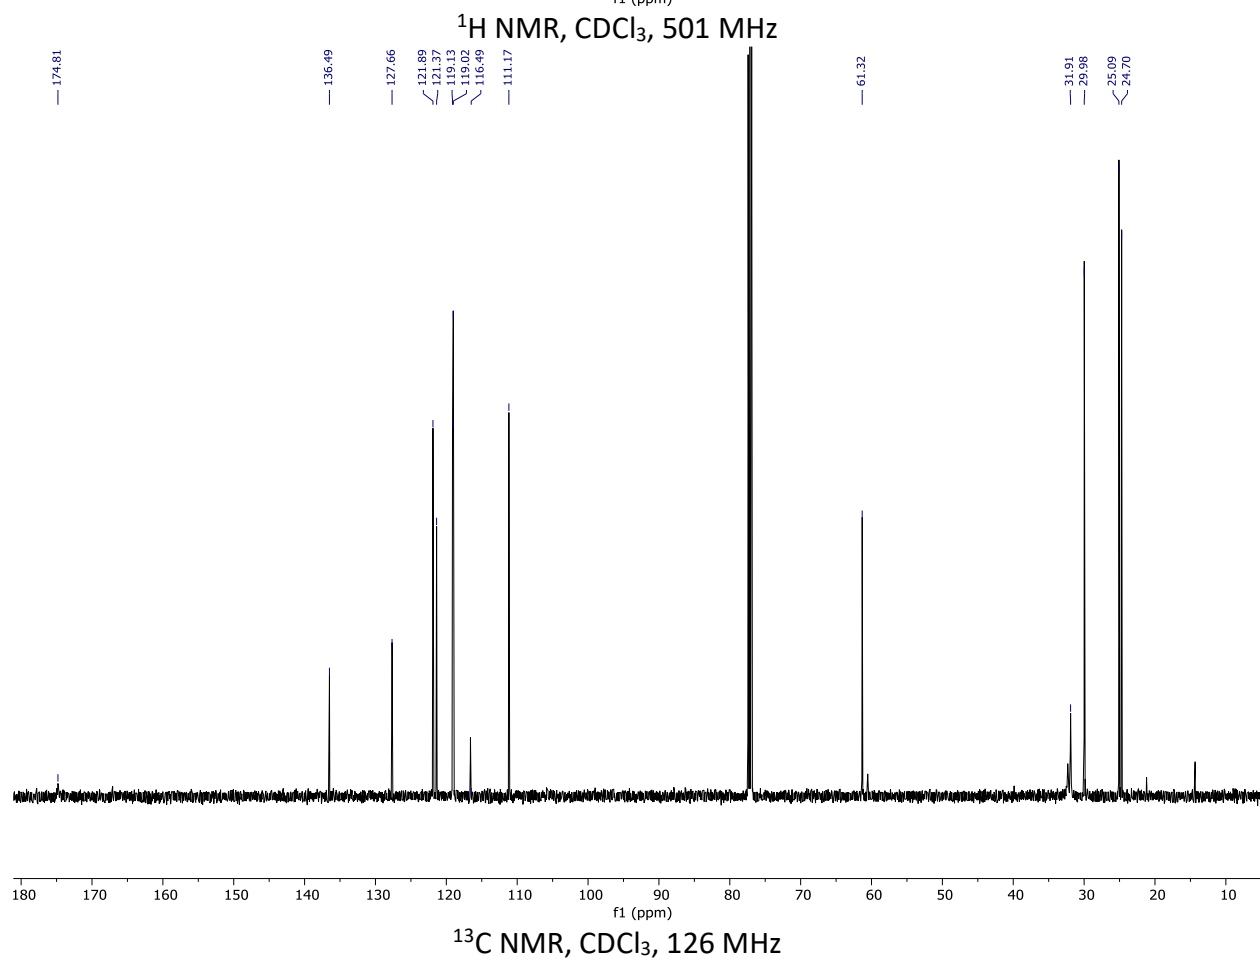



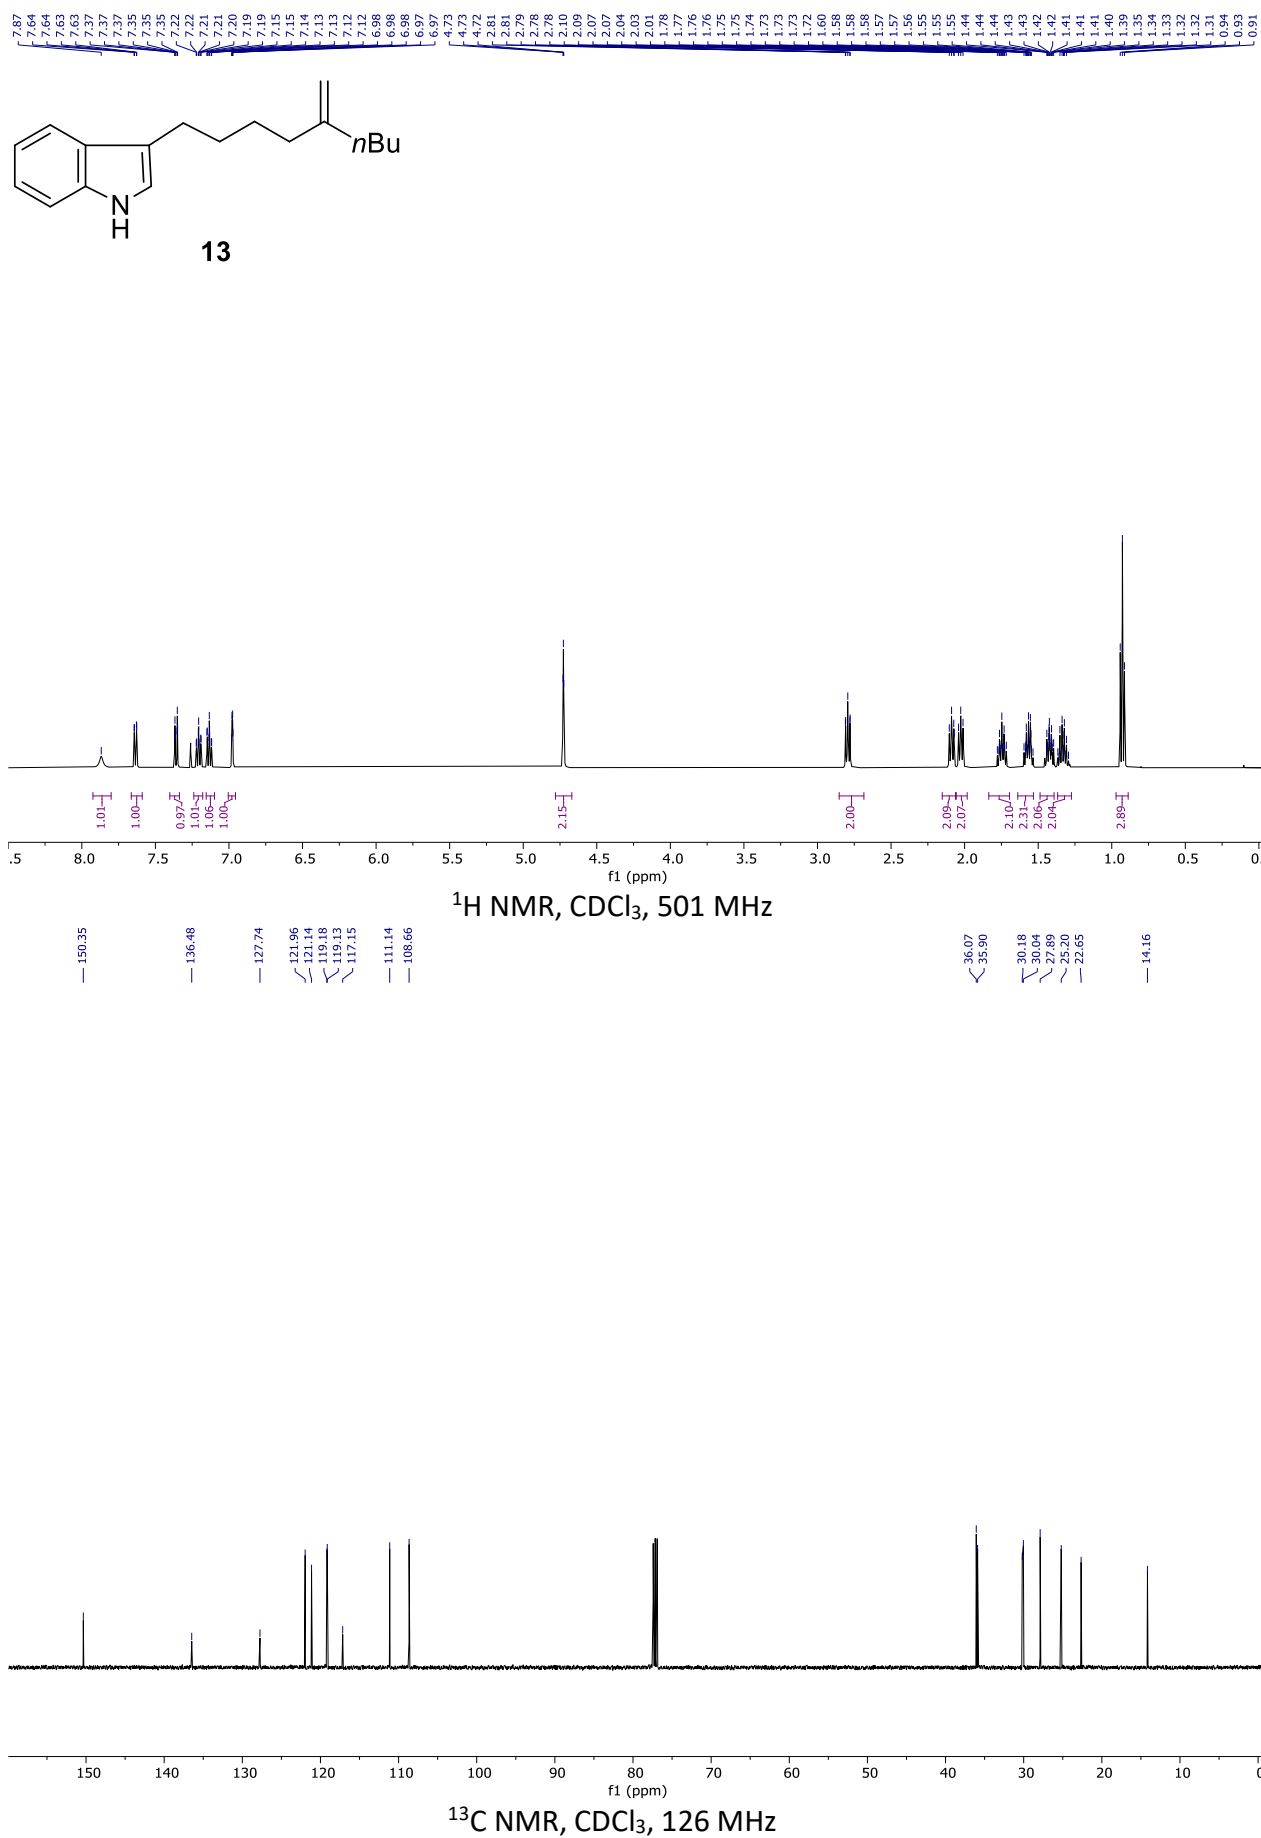

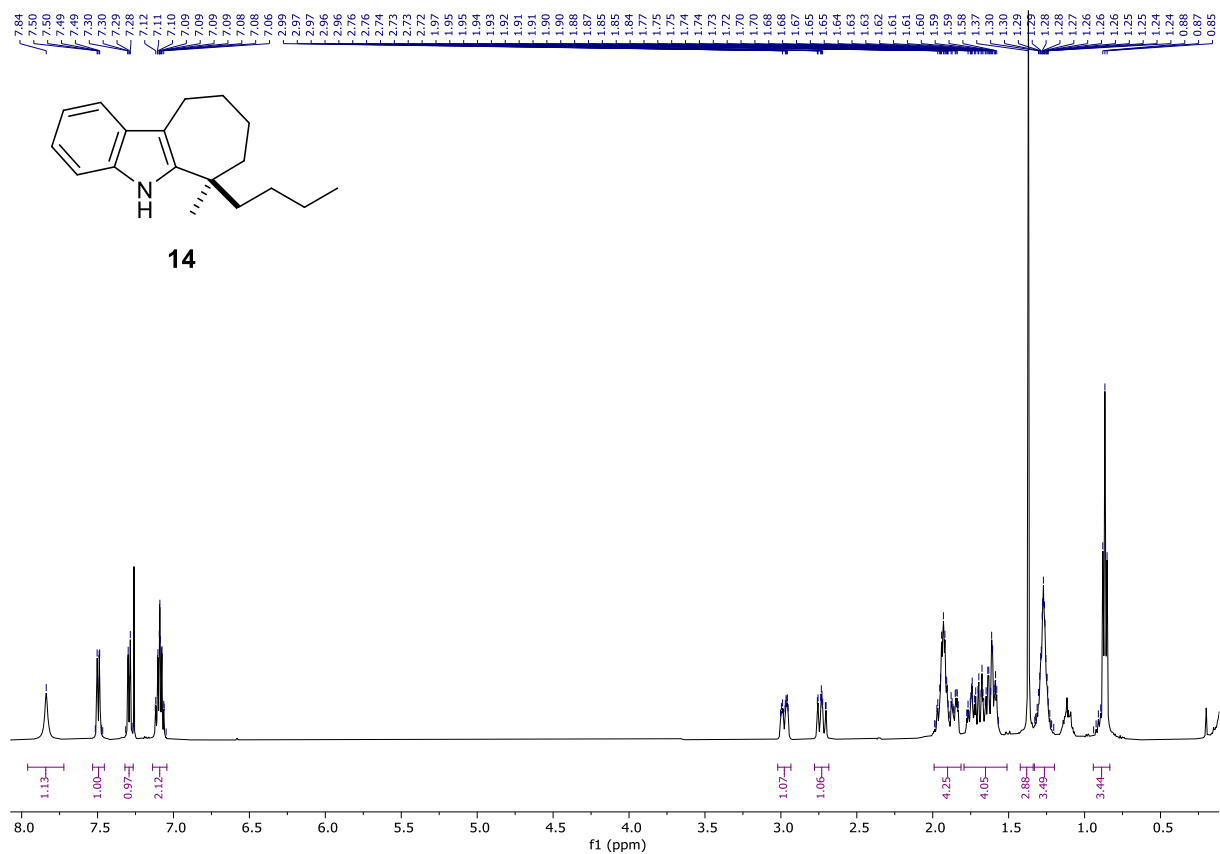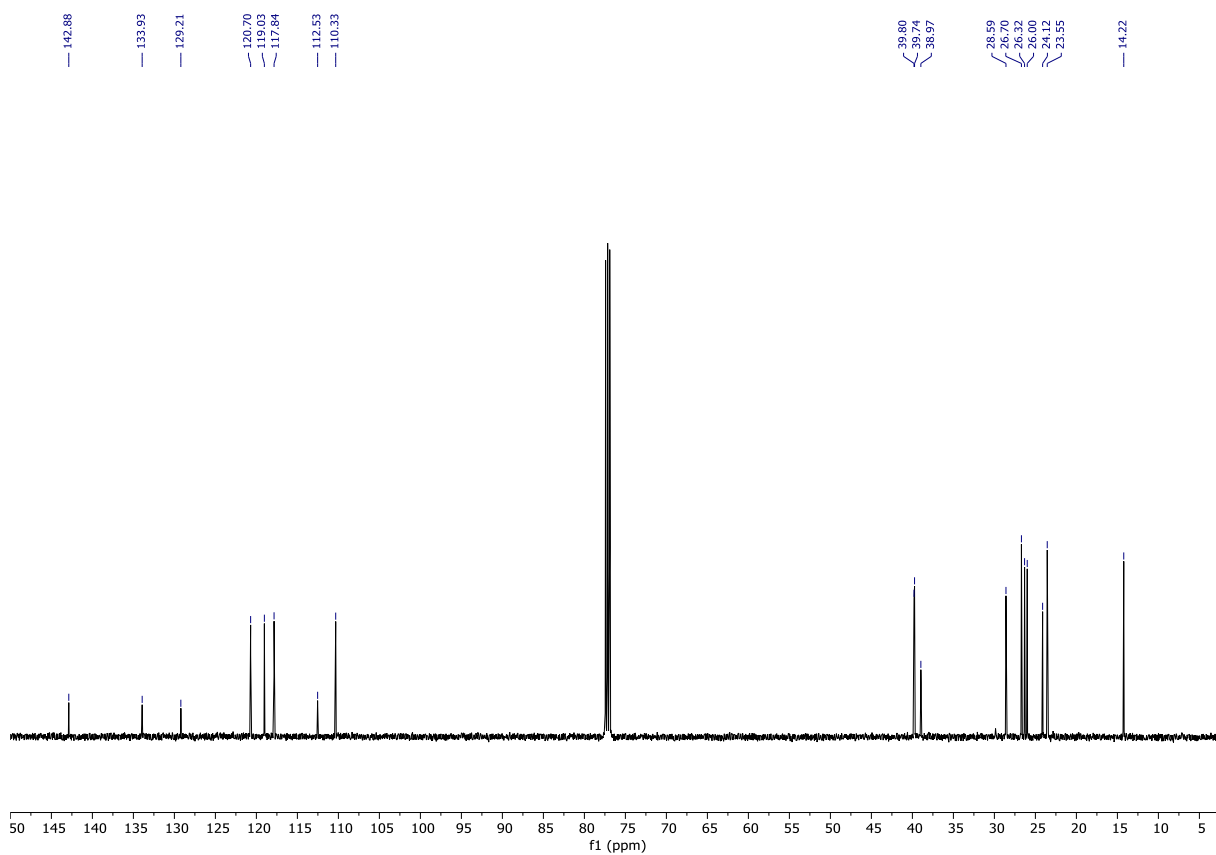

## 10. HPLC traces

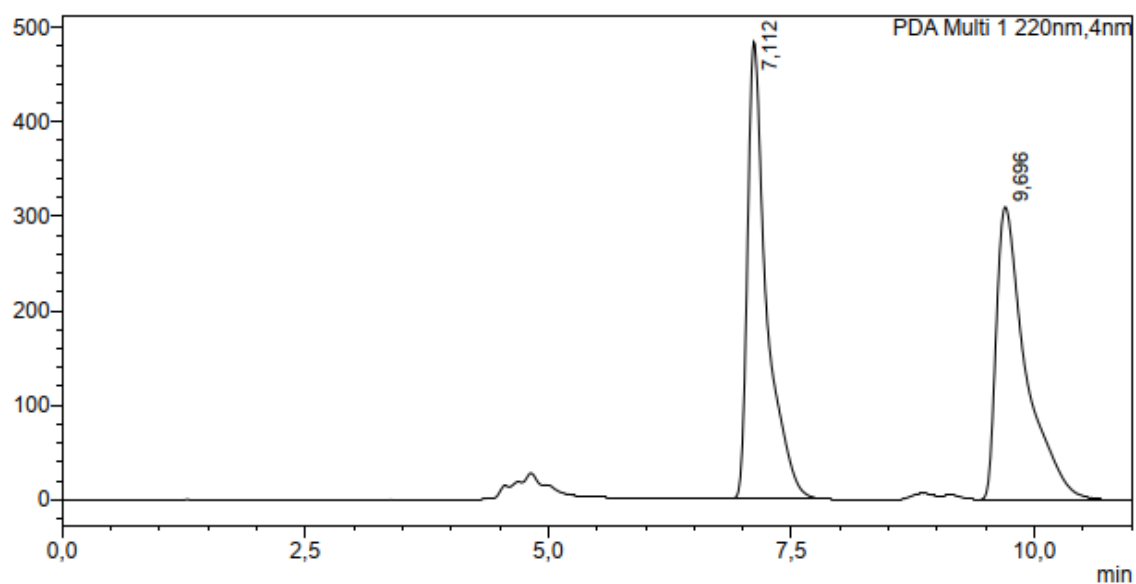

### <Peak Table>

PDA Ch1 220nm

| Peak# | Ret. Time | Area     | Area%   | Height | Name |
|-------|-----------|----------|---------|--------|------|
| 1     | 7,112     | 6555072  | 49,795  | 483335 |      |
| 2     | 9,696     | 6609106  | 50,205  | 310010 |      |
| Total |           | 13164177 | 100,000 | 793345 |      |

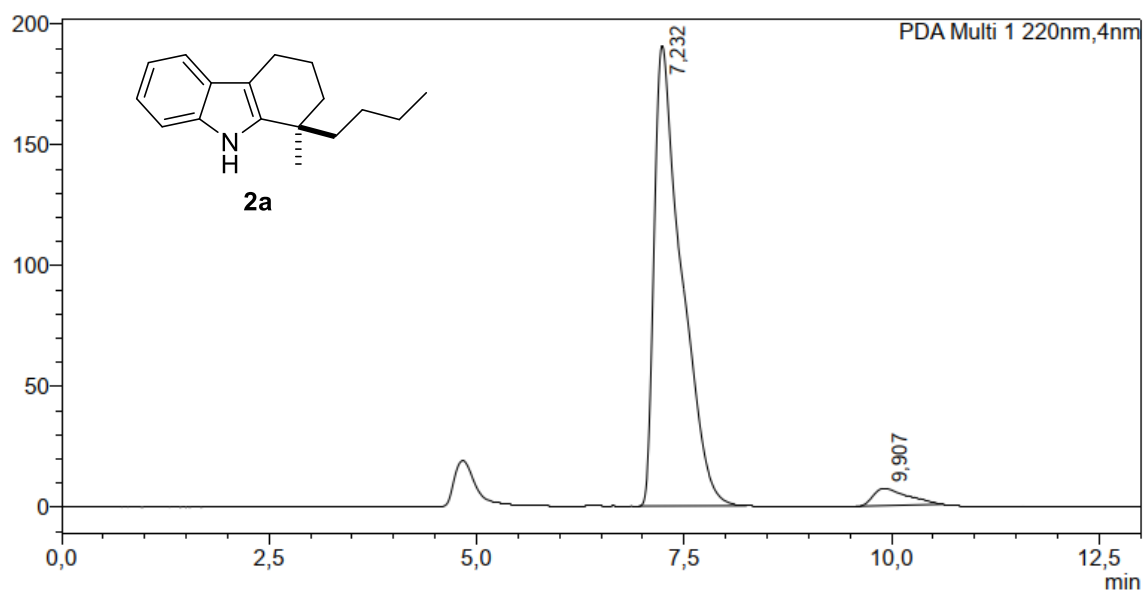

### <Peak Table>

PDA Ch1 220nm

| Peak# | Ret. Time | Area    | Area%   | Height | Name |
|-------|-----------|---------|---------|--------|------|
| 1     | 7,232     | 4330774 | 95,434  | 190668 |      |
| 2     | 9,907     | 207213  | 4,566   | 7211   |      |
| Total |           | 4537987 | 100,000 | 197879 |      |

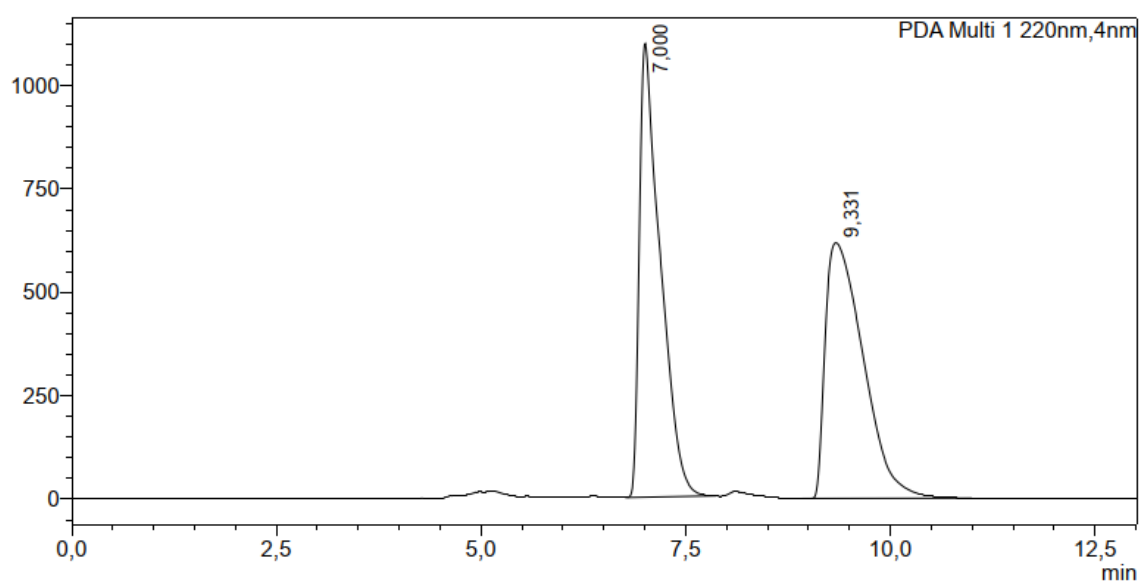

### <Peak Table>

PDA Ch1 220nm

| Peak# | Ret. Time | Area     | Area%   | Height  | Name |
|-------|-----------|----------|---------|---------|------|
| 1     | 7,000     | 19512771 | 49,350  | 1096976 |      |
| 2     | 9,331     | 20026729 | 50,650  | 618493  |      |
| Total |           | 39539500 | 100,000 | 1715469 |      |

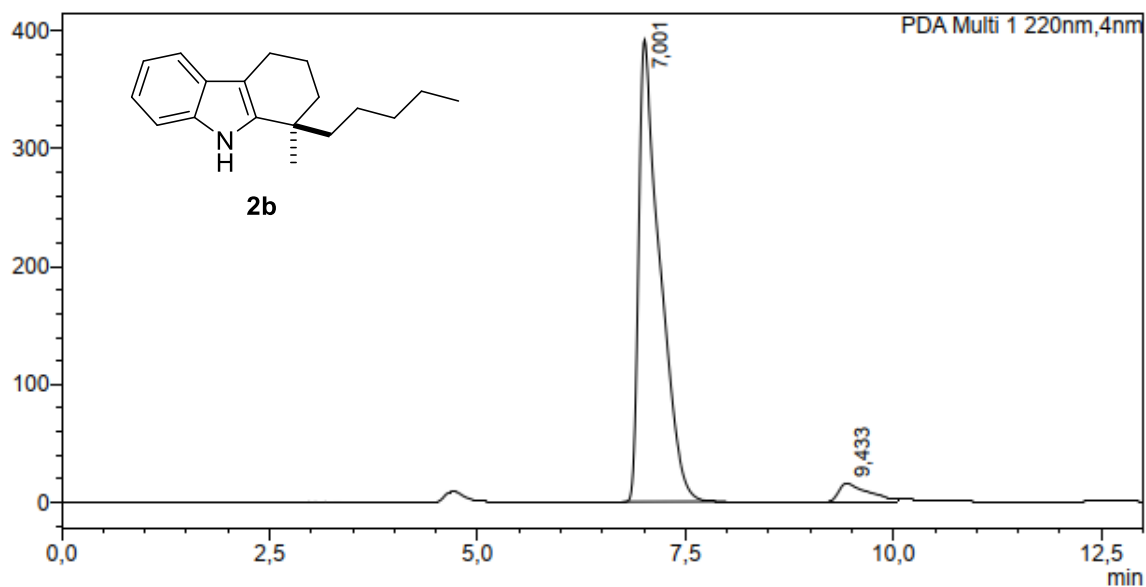

### <Peak Table>

PDA Ch1 220nm

| Peak# | Ret. Time | Area    | Area%   | Height | Name |
|-------|-----------|---------|---------|--------|------|
| 1     | 7,001     | 6944002 | 94,714  | 391758 |      |
| 2     | 9,433     | 387571  | 5,286   | 15752  |      |
| Total |           | 7331573 | 100,000 | 407510 |      |

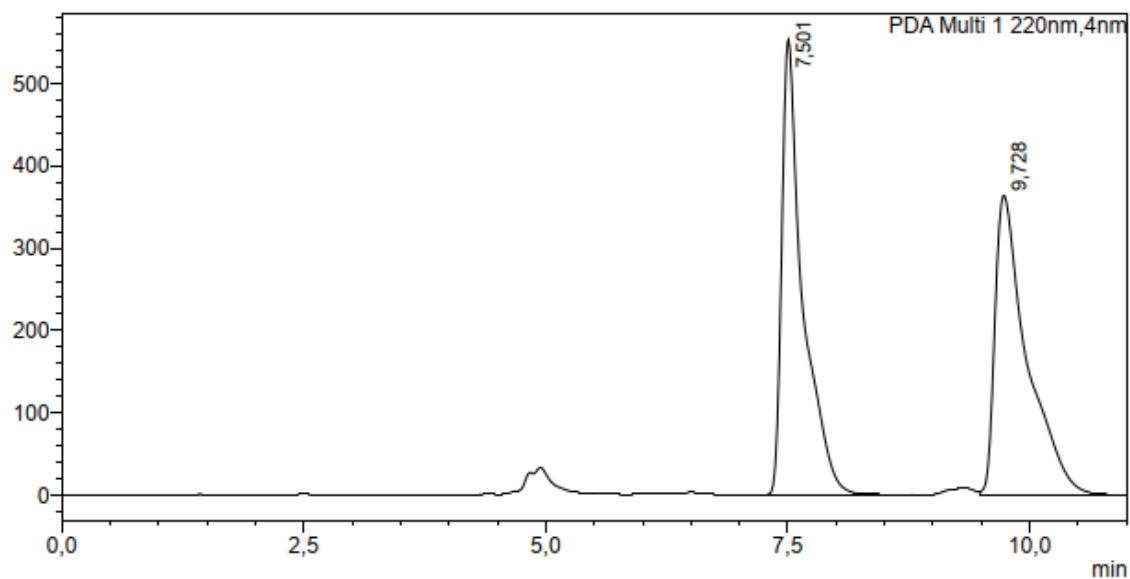

<Peak Table>

PDA Ch1 220nm

| Peak# | Ret. Time | Area     | Area%   | Height | Name |
|-------|-----------|----------|---------|--------|------|
| 1     | 7,501     | 8359157  | 50,026  | 552864 |      |
| 2     | 9,728     | 8350557  | 49,974  | 362939 |      |
| Total |           | 16709713 | 100,000 | 915803 |      |

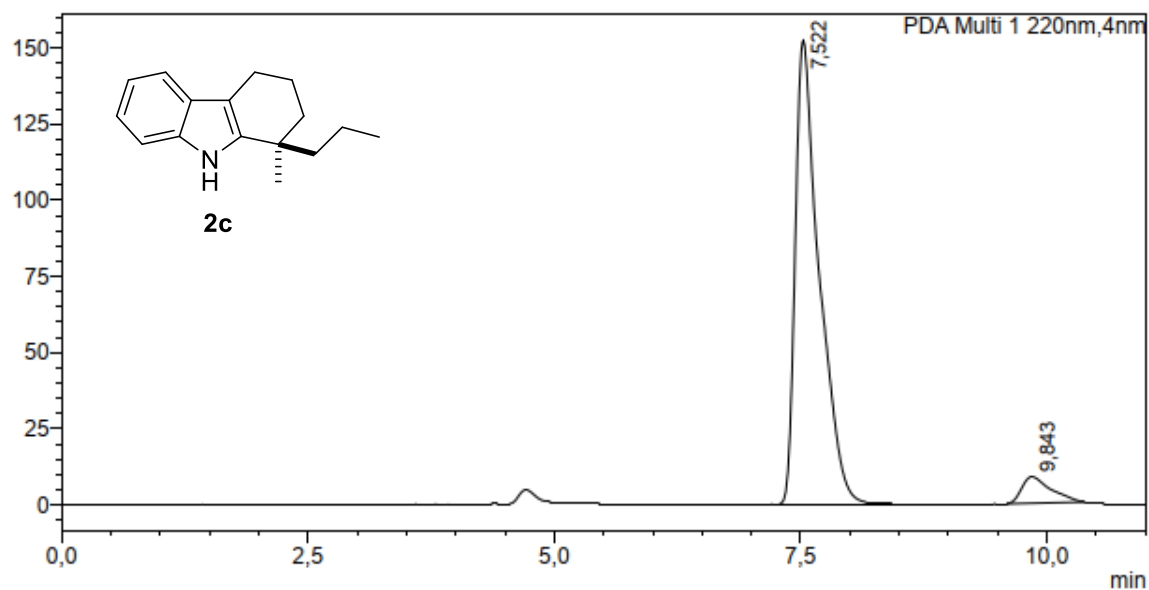

<Peak Table>

PDA Ch1 220nm

| Peak# | Ret. Time | Area    | Area%   | Height | Name |
|-------|-----------|---------|---------|--------|------|
| 1     | 7,522     | 2564434 | 93,502  | 152164 |      |
| 2     | 9,843     | 178207  | 6,498   | 8689   |      |
| Total |           | 2742641 | 100,000 | 160853 |      |

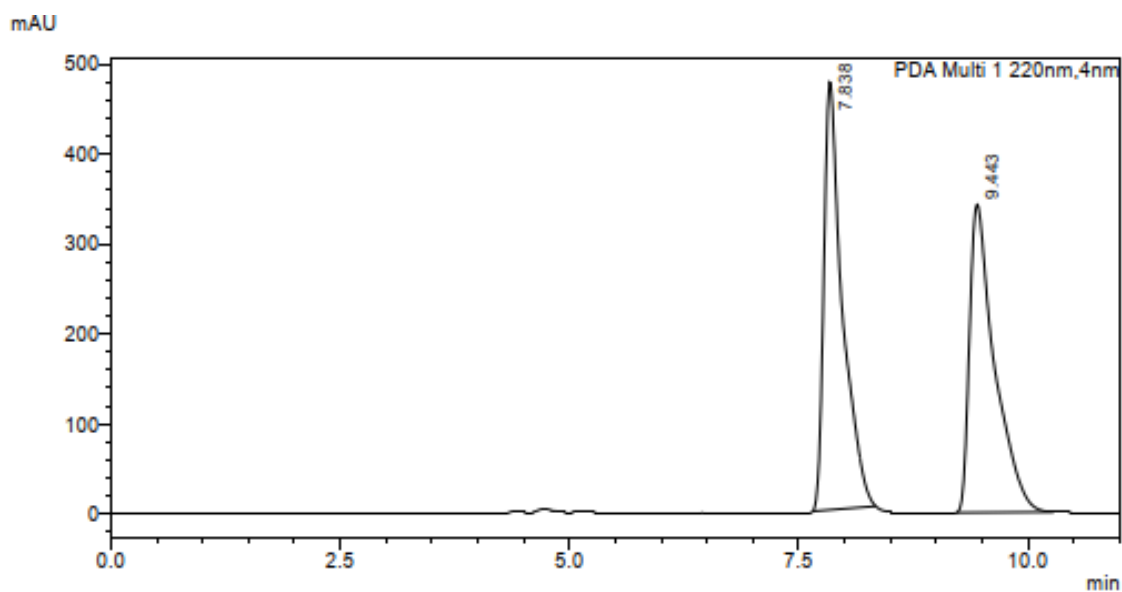

<Peak Table>

PDA Ch1 220nm

| Peak# | Ret. Time | Area     | Area%   | Height | Name |
|-------|-----------|----------|---------|--------|------|
| 1     | 7.838     | 6715221  | 50.766  | 475700 |      |
| 2     | 9.443     | 6512648  | 49.234  | 342501 |      |
| Total |           | 13227869 | 100.000 | 818201 |      |

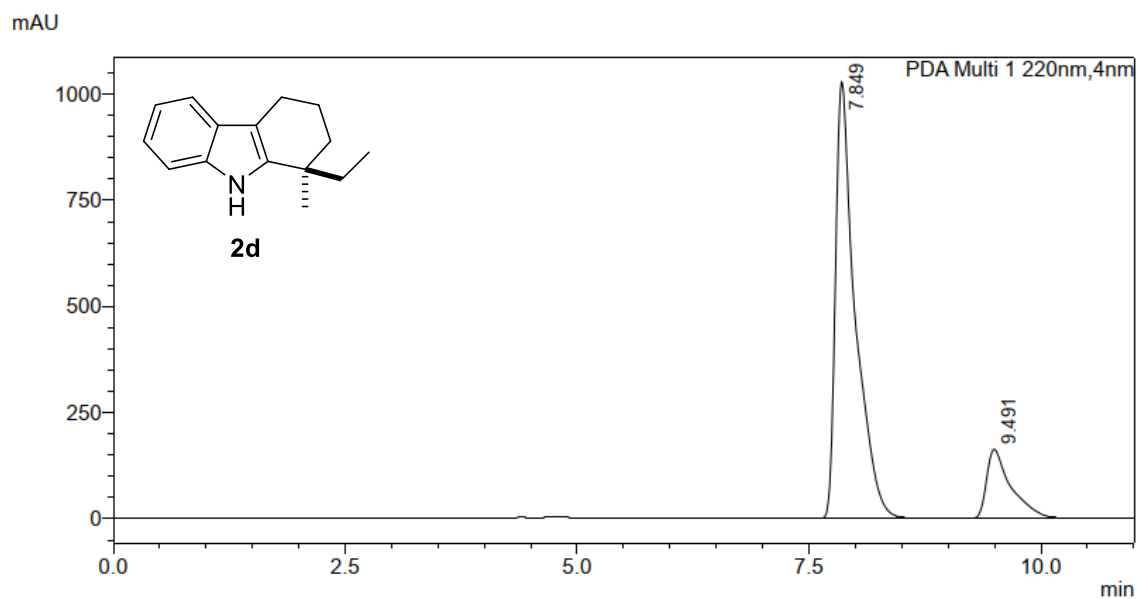

<Peak Table>

PDA Ch1 220nm

| Peak# | Ret. Time | Area     | Area%   | Height  | Name |
|-------|-----------|----------|---------|---------|------|
| 1     | 7.849     | 15264071 | 83.703  | 1028036 |      |
| 2     | 9.491     | 2971977  | 16.297  | 162700  |      |
| Total |           | 18236048 | 100.000 | 1190736 |      |

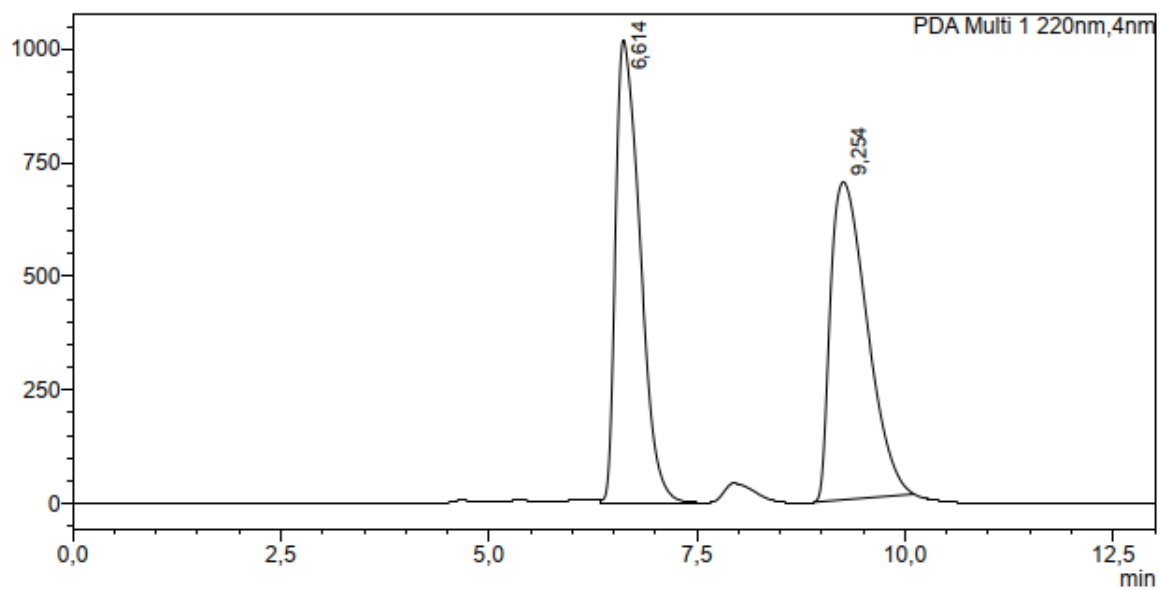

### <Peak Table>

PDA Ch1 220nm

| Peak# | Ret. Time | Area     | Area%   | Height  | Name |
|-------|-----------|----------|---------|---------|------|
| 1     | 6,614     | 20922165 | 49,446  | 1019391 |      |
| 2     | 9,254     | 21391080 | 50,554  | 700006  |      |
| Total |           | 42313245 | 100,000 | 1719397 |      |

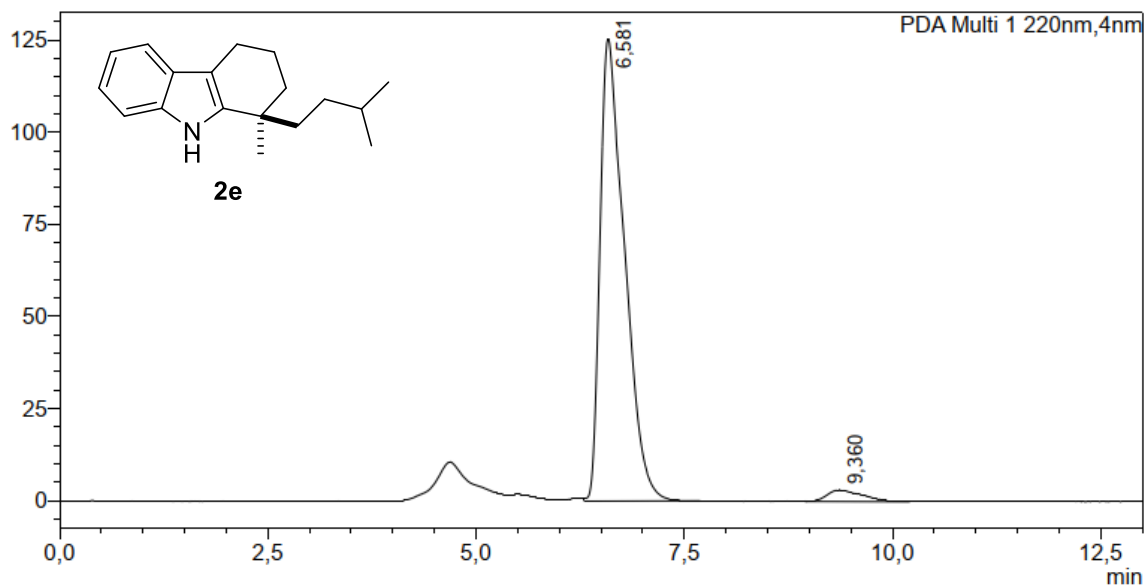

### <Peak Table>

PDA Ch1 220nm

| Peak# | Ret. Time | Area    | Area%   | Height | Name |
|-------|-----------|---------|---------|--------|------|
| 1     | 6,581     | 2564232 | 96,601  | 125597 |      |
| 2     | 9,360     | 90226   | 3,399   | 3129   |      |
| Total |           | 2654459 | 100,000 | 128725 |      |

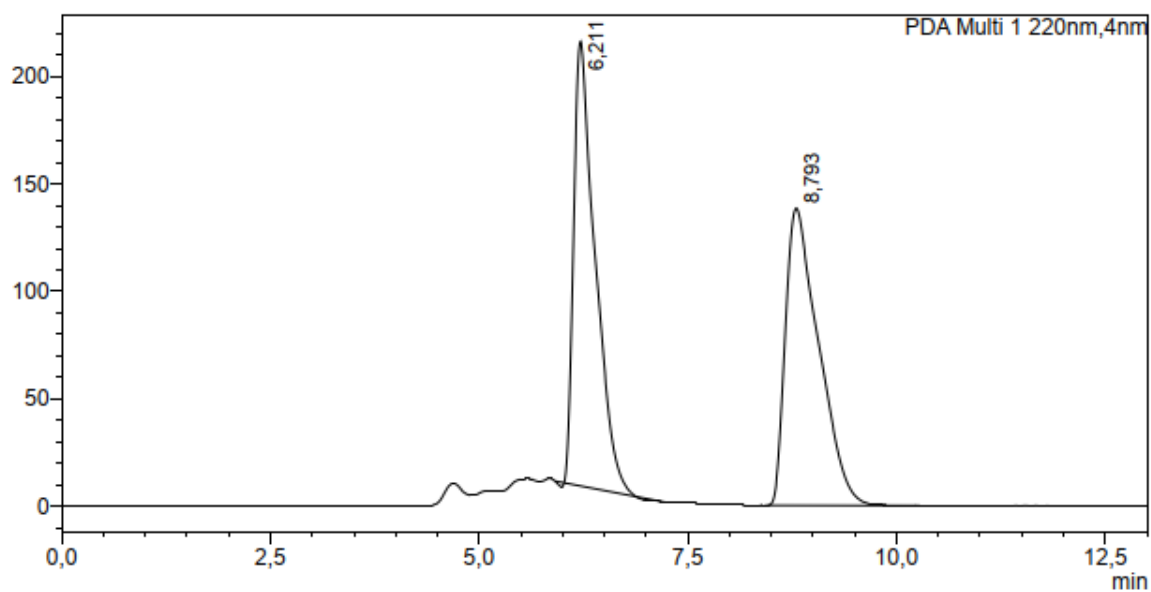

<Peak Table>

PDA Ch1 220nm

| Peak# | Ret. Time | Area    | Area%   | Height | Name |
|-------|-----------|---------|---------|--------|------|
| 1     | 6,211     | 3702578 | 49,090  | 206907 |      |
| 2     | 8,793     | 3839873 | 50,910  | 138327 |      |
| Total |           | 7542451 | 100,000 | 345233 |      |

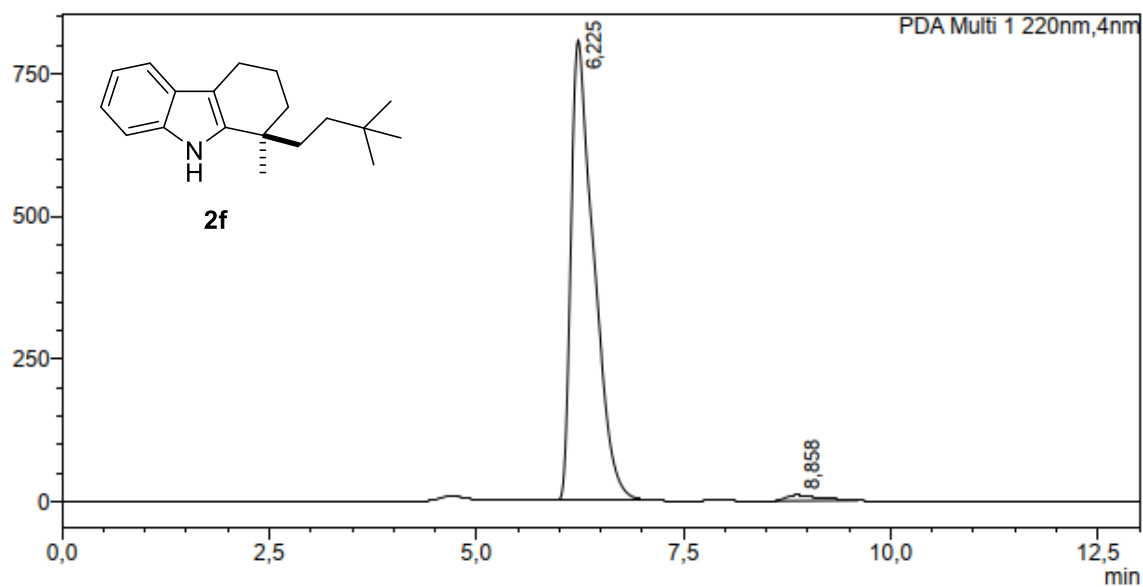

<Peak Table>

PDA Ch1 220nm

| Peak# | Ret. Time | Area     | Area%   | Height | Name |
|-------|-----------|----------|---------|--------|------|
| 1     | 6,225     | 15428327 | 98,186  | 806205 |      |
| 2     | 8,858     | 285118   | 1,814   | 9948   |      |
| Total |           | 15713445 | 100,000 | 816152 |      |

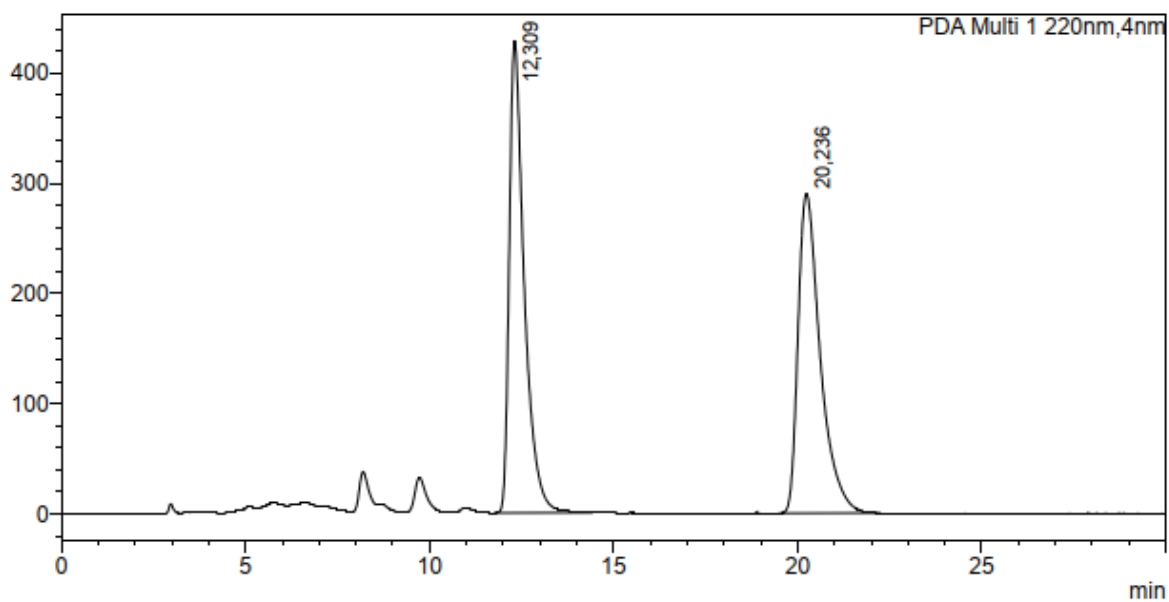

<Peak Table>

PDA Ch1 220nm

| Peak# | Ret. Time | Area     | Area%   | Height | Name |
|-------|-----------|----------|---------|--------|------|
| 1     | 12,309    | 12136096 | 49,966  | 427897 |      |
| 2     | 20,236    | 12152710 | 50,034  | 289520 |      |
| Total |           | 24288806 | 100,000 | 717417 |      |

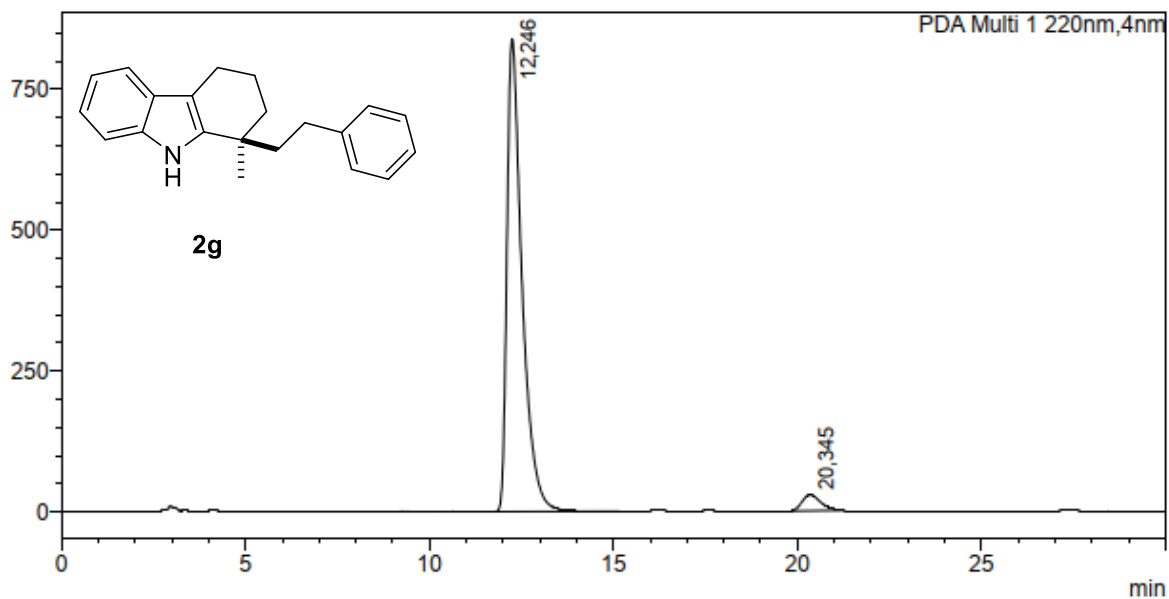

<Peak Table>

PDA Ch1 220nm

| Peak# | Ret. Time | Area     | Area%   | Height | Name |
|-------|-----------|----------|---------|--------|------|
| 1     | 12,246    | 23972452 | 96,011  | 838683 |      |
| 2     | 20,345    | 995988   | 3,989   | 28360  |      |
| Total |           | 24968440 | 100,000 | 867043 |      |

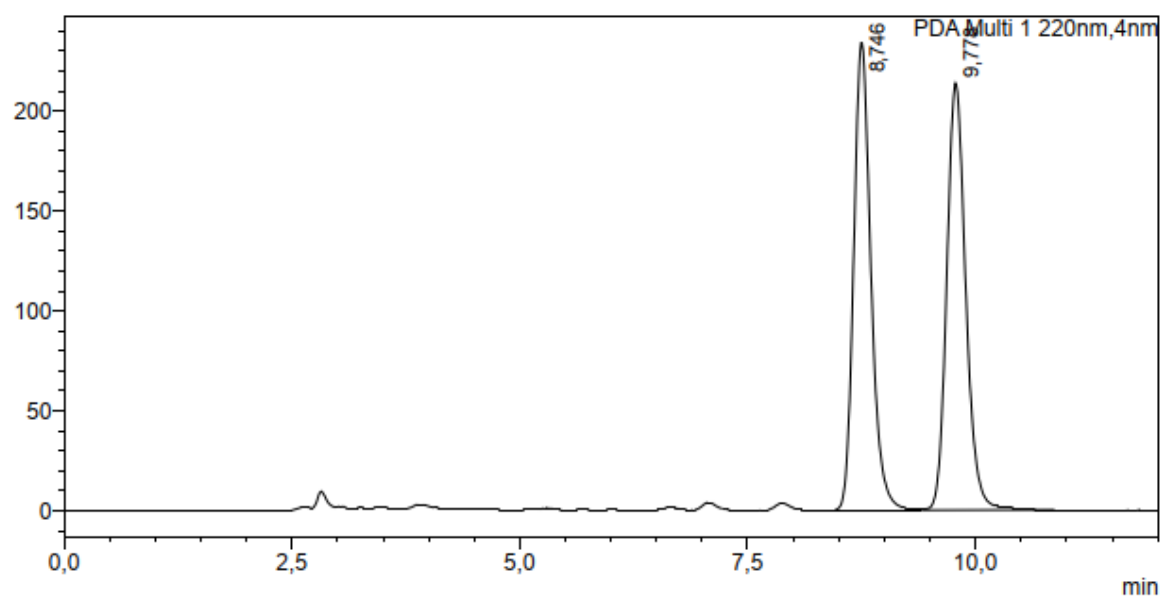

### <Peak Table>

PDA Ch1 220nm

| Peak# | Ret. Time | Area    | Area%   | Height | Name |
|-------|-----------|---------|---------|--------|------|
| 1     | 8,746     | 3079010 | 49,826  | 233869 |      |
| 2     | 9,778     | 3100570 | 50,174  | 213586 |      |
| Total |           | 6179580 | 100,000 | 447455 |      |

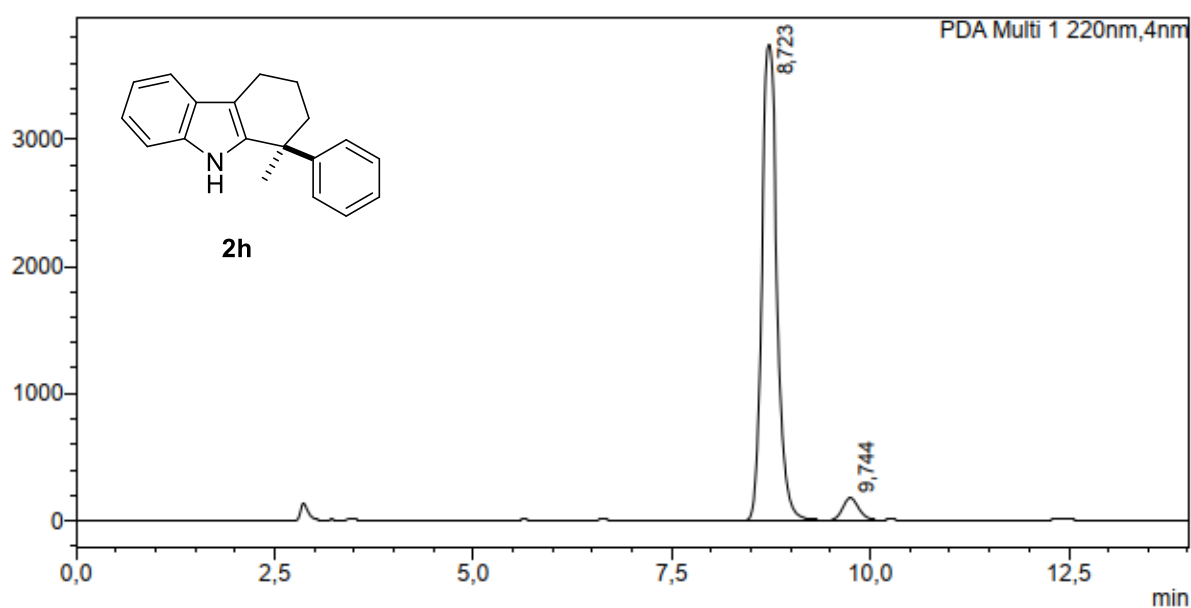

### <Peak Table>

PDA Ch1 220nm

| Peak# | Ret. Time | Area     | Area%   | Height  | Name |
|-------|-----------|----------|---------|---------|------|
| 1     | 8,723     | 49297650 | 94,942  | 3741856 |      |
| 2     | 9,744     | 2626386  | 5,058   | 179021  |      |
| Total |           | 51924036 | 100,000 | 3920877 |      |

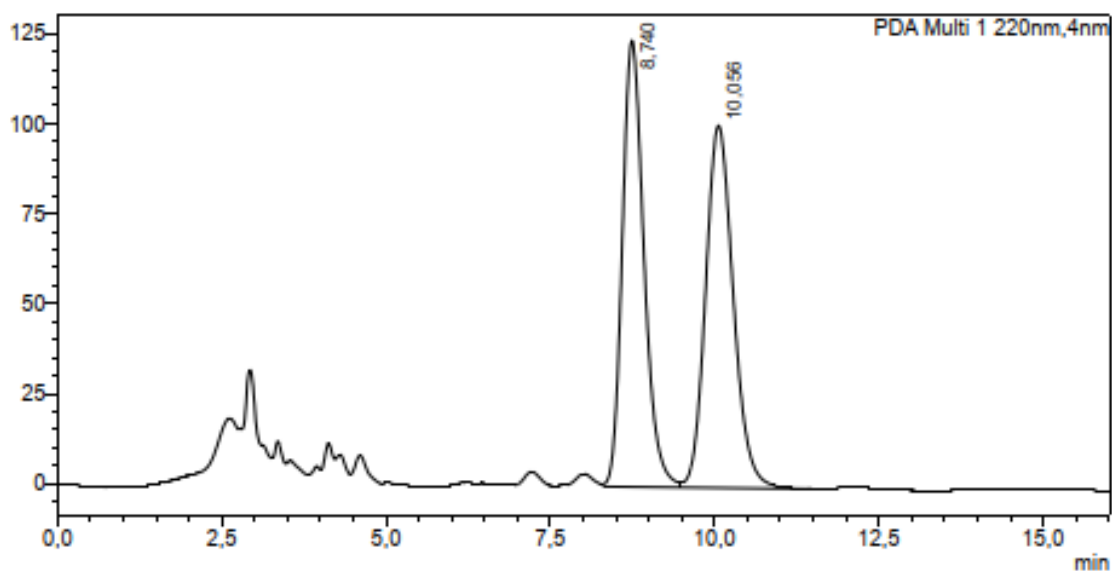

### <Peak Table>

| PDA Ch1 220nm |           |         |         |        |      |
|---------------|-----------|---------|---------|--------|------|
| Peak#         | Ret. Time | Area    | Area%   | Height | Name |
| 1             | 8,740     | 2841868 | 49,075  | 123895 |      |
| 2             | 10,056    | 2949010 | 50,925  | 100602 |      |
| Total         |           | 5790878 | 100,000 | 224497 |      |

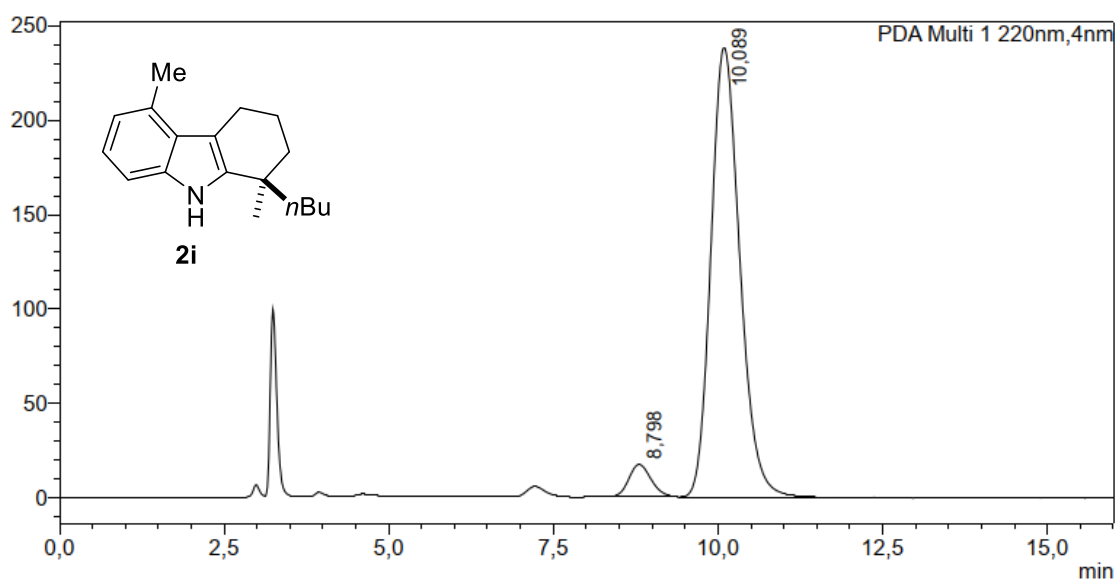

### <Peak Table>

| PDA Ch1 220nm |           |         |         |        |      |
|---------------|-----------|---------|---------|--------|------|
| Peak#         | Ret. Time | Area    | Area%   | Height | Name |
| 1             | 8,798     | 375426  | 4,928   | 16631  |      |
| 2             | 10,089    | 7242353 | 95,072  | 238074 |      |
| Total         |           | 7617779 | 100,000 | 254705 |      |

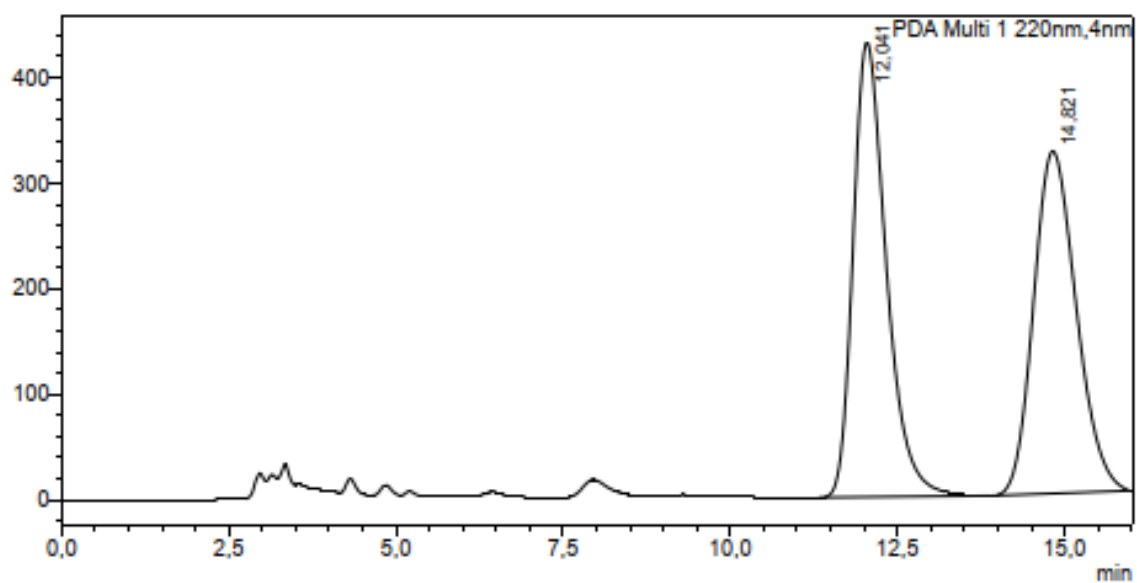

### <Peak Table>

PDA Ch1 220nm

| Peak# | Ret. Time | Area     | Area%   | Height | Name |
|-------|-----------|----------|---------|--------|------|
| 1     | 12,041    | 14895339 | 50,883  | 430846 |      |
| 2     | 14,821    | 14378121 | 49,117  | 324266 |      |
| Total |           | 29273460 | 100,000 | 755111 |      |

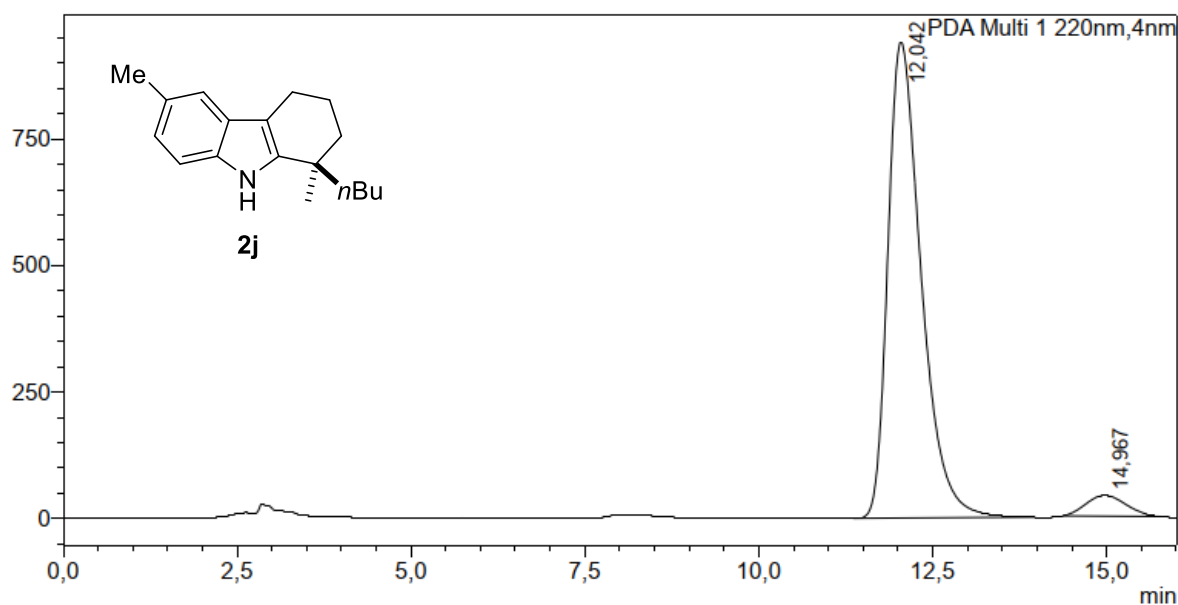

### <Peak Table>

PDA Ch1 220nm

| Peak# | Ret. Time | Area     | Area%   | Height | Name |
|-------|-----------|----------|---------|--------|------|
| 1     | 12,042    | 31329201 | 95,014  | 941062 |      |
| 2     | 14,967    | 1643938  | 4,986   | 41069  |      |
| Total |           | 32973139 | 100,000 | 982131 |      |

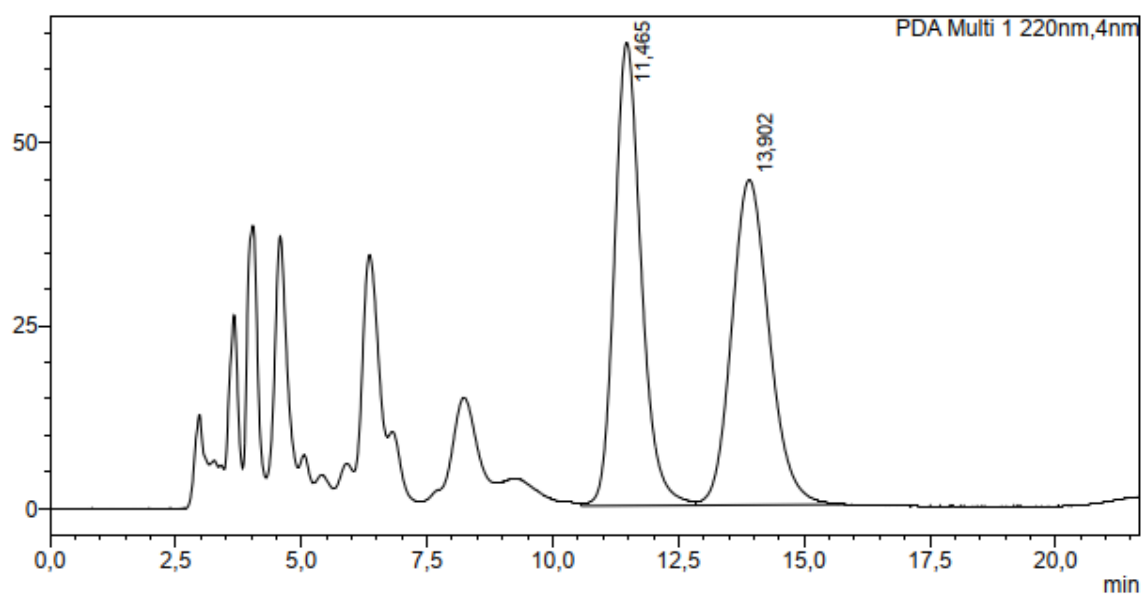

### <Peak Table>

PDA Ch1 220nm

| Peak# | Ret. Time | Area    | Area%   | Height | Name |
|-------|-----------|---------|---------|--------|------|
| 1     | 11.465    | 2342081 | 50.406  | 63161  |      |
| 2     | 13.902    | 2304356 | 49.594  | 44382  |      |
| Total |           | 4646437 | 100,000 | 107543 |      |

mAU

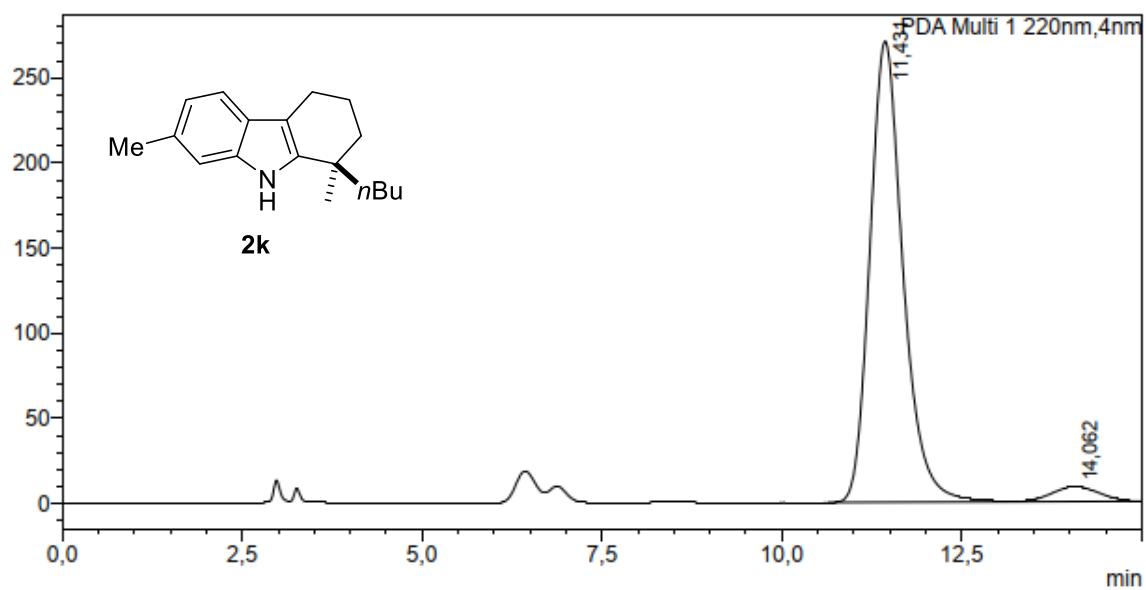

### <Peak Table>

PDA Ch1 220nm

| Peak# | Ret. Time | Area    | Area%   | Height | Name |
|-------|-----------|---------|---------|--------|------|
| 1     | 11.431    | 8687713 | 95.502  | 270802 |      |
| 2     | 14.062    | 409186  | 4.498   | 8818   |      |
| Total |           | 9096899 | 100,000 | 279621 |      |

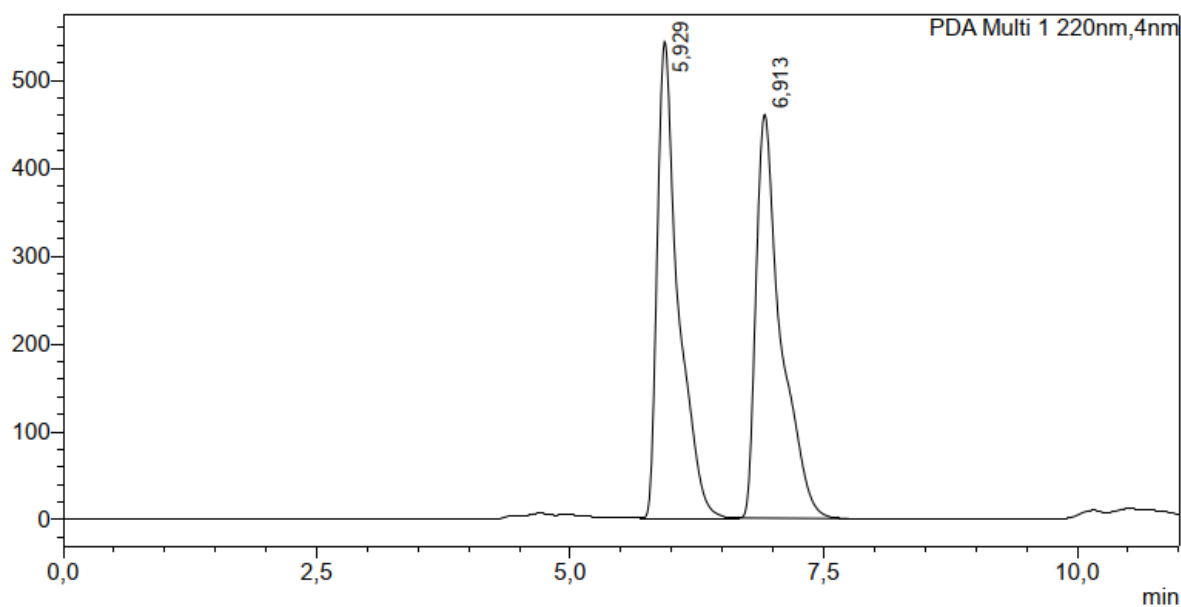

### <Peak Table>

PDA Ch1 220nm

| Peak# | Ret. Time | Area     | Area%   | Height  | Name |
|-------|-----------|----------|---------|---------|------|
| 1     | 5.929     | 7878754  | 50,187  | 543785  |      |
| 2     | 6.913     | 7820119  | 49,813  | 459484  |      |
| Total |           | 15698873 | 100,000 | 1003269 |      |

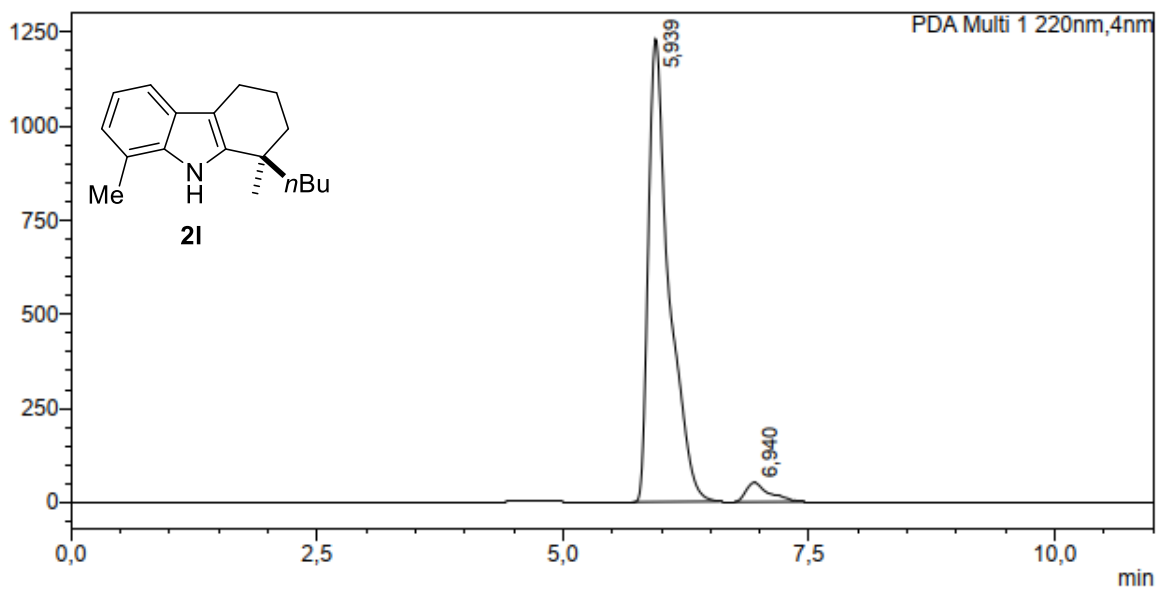

### <Peak Table>

PDA Ch1 220nm

| Peak# | Ret. Time | Area     | Area%   | Height  | Name |
|-------|-----------|----------|---------|---------|------|
| 1     | 5.939     | 18015707 | 95,574  | 1230517 |      |
| 2     | 6.940     | 834319   | 4,426   | 51171   |      |
| Total |           | 18850026 | 100,000 | 1281688 |      |

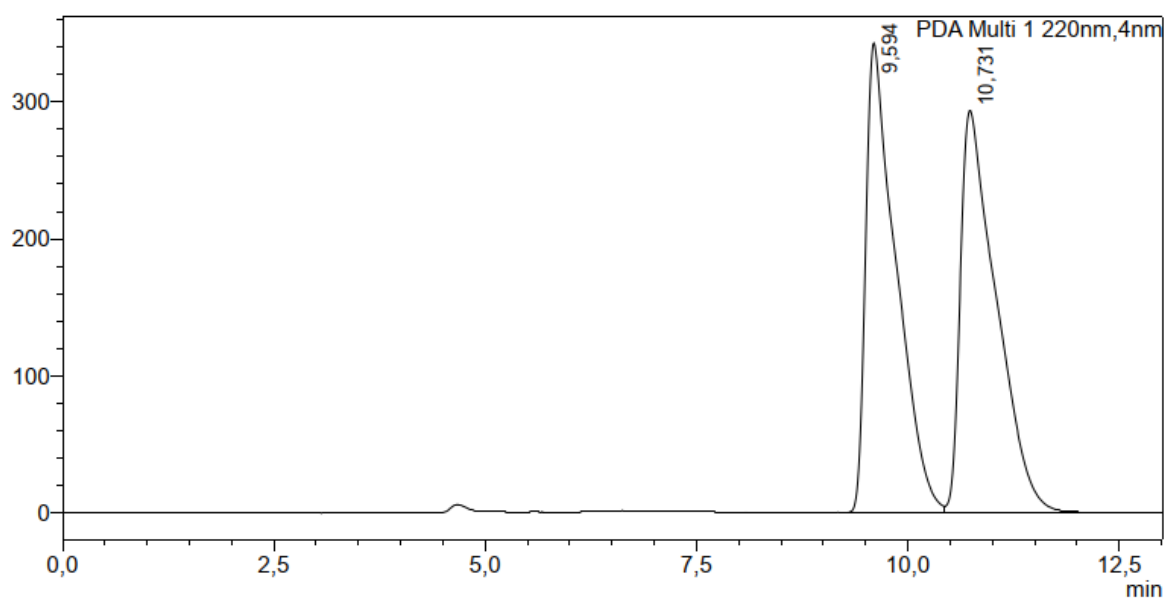

### <Peak Table>

PDA Ch1 220nm

| Peak# | Ret. Time | Area     | Area%   | Height | Name |
|-------|-----------|----------|---------|--------|------|
| 1     | 9,594     | 8569120  | 49,782  | 342203 |      |
| 2     | 10,731    | 8644182  | 50,218  | 292624 |      |
| Total |           | 17213302 | 100,000 | 634827 |      |

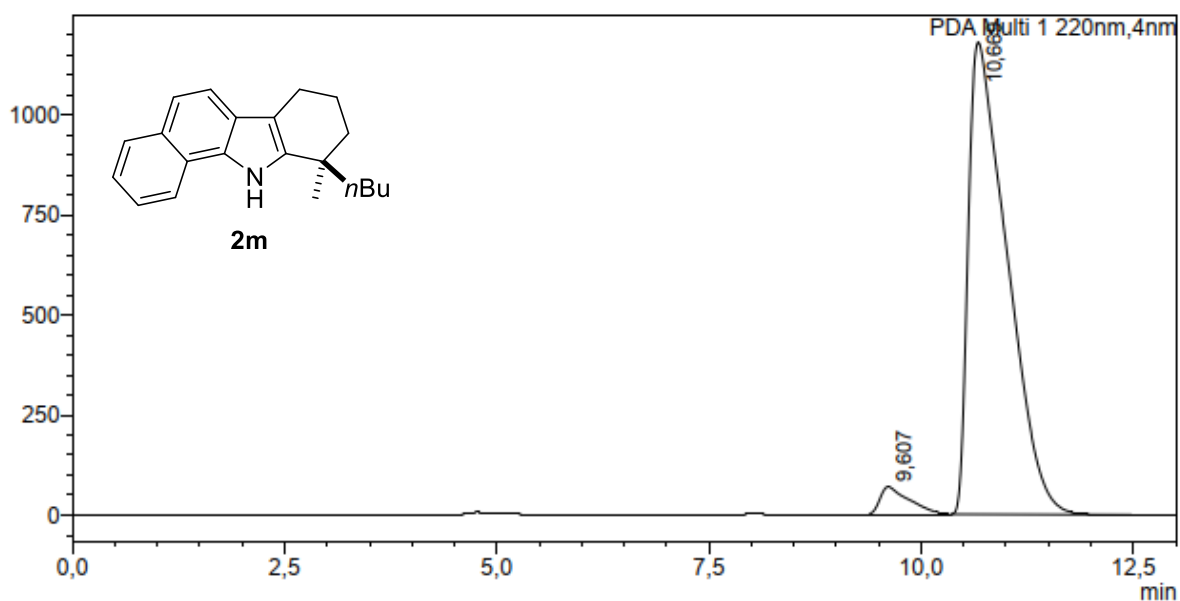

### <Peak Table>

PDA Ch1 220nm

| Peak# | Ret. Time | Area     | Area%   | Height  | Name |
|-------|-----------|----------|---------|---------|------|
| 1     | 9,607     | 1739927  | 4,435   | 70747   |      |
| 2     | 10,669    | 37488515 | 95,565  | 1179652 |      |
| Total |           | 39228442 | 100,000 | 1250399 |      |

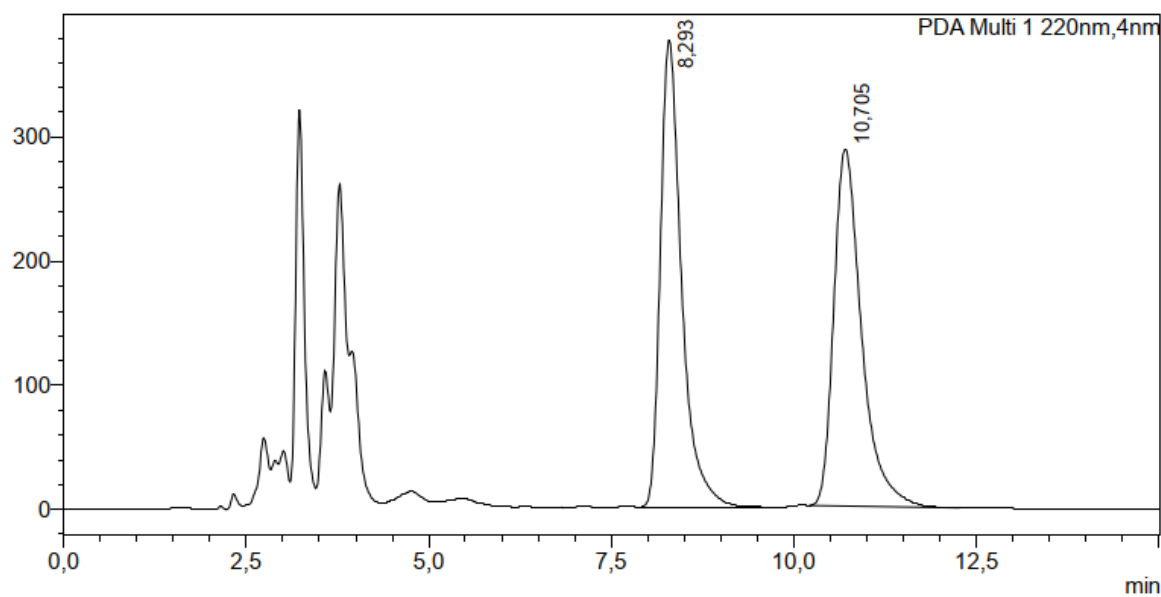

**<Peak Table>**

PDA Ch1 220nm

| Peak# | Ret. Time | Area     | Area%   | Height | Name |
|-------|-----------|----------|---------|--------|------|
| 1     | 8,293     | 7606953  | 50,035  | 375958 |      |
| 2     | 10,705    | 7596282  | 49,965  | 287486 |      |
| Total |           | 15203234 | 100,000 | 663444 |      |

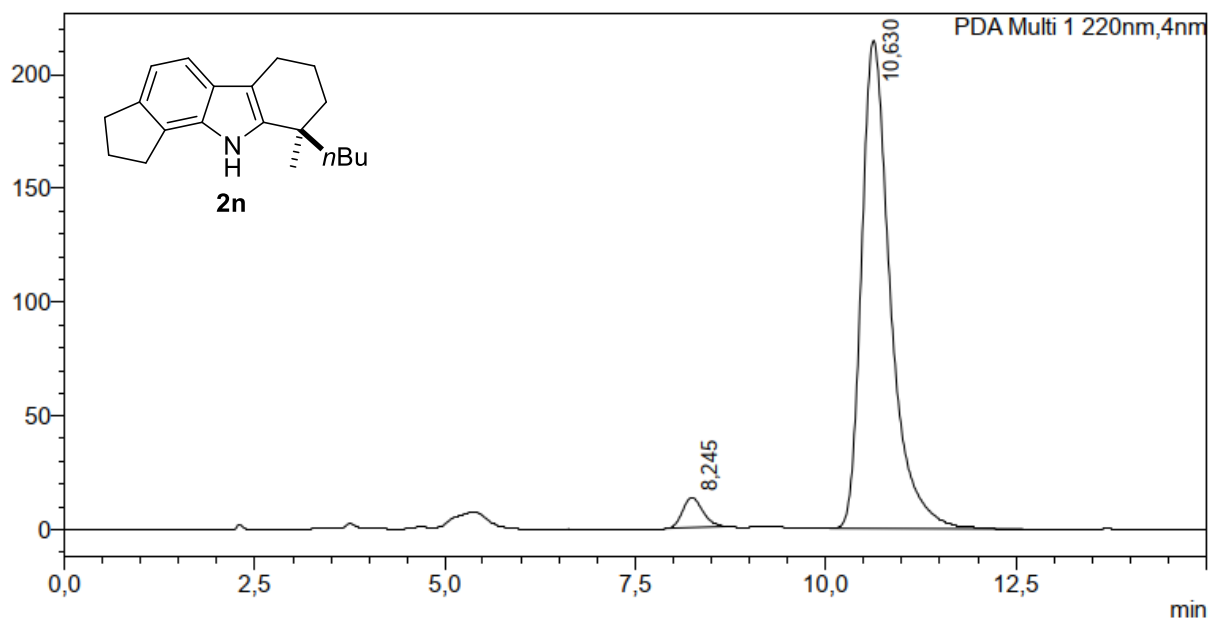

**<Peak Table>**

PDA Ch1 220nm

| Peak# | Ret. Time | Area    | Area%   | Height | Name |
|-------|-----------|---------|---------|--------|------|
| 1     | 8,245     | 246908  | 4,173   | 13367  |      |
| 2     | 10,630    | 5669500 | 95,827  | 214534 |      |
| Total |           | 5916409 | 100,000 | 227900 |      |

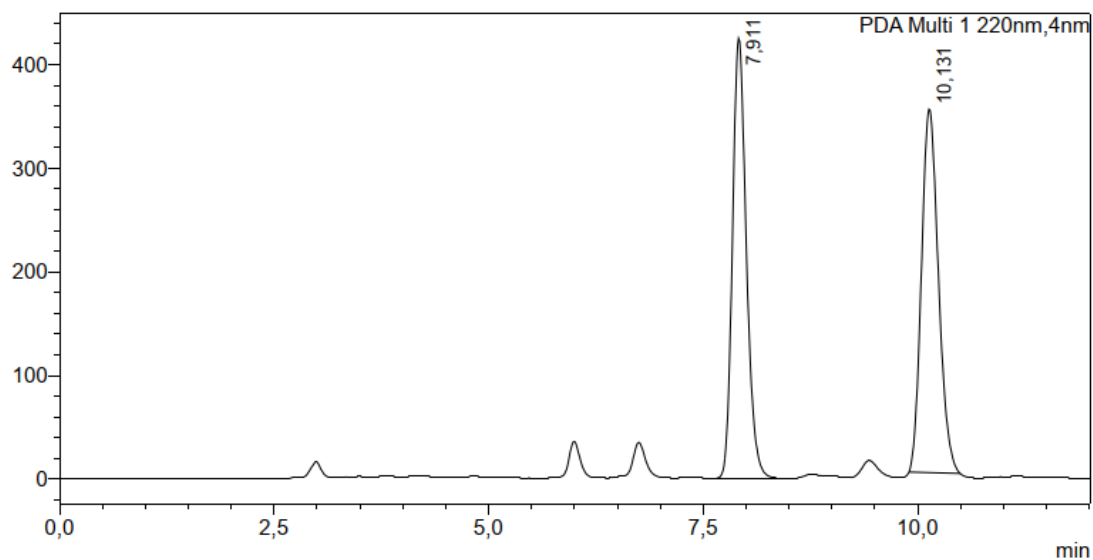

### <Peak Table>

PDA Ch1 220nm

| Peak# | Ret. Time | Area    | Area%   | Height | Name |
|-------|-----------|---------|---------|--------|------|
| 1     | 7,911     | 4774281 | 49,770  | 424466 |      |
| 2     | 10,131    | 4818341 | 50,230  | 350540 |      |
| Total |           | 9592622 | 100,000 | 775007 |      |

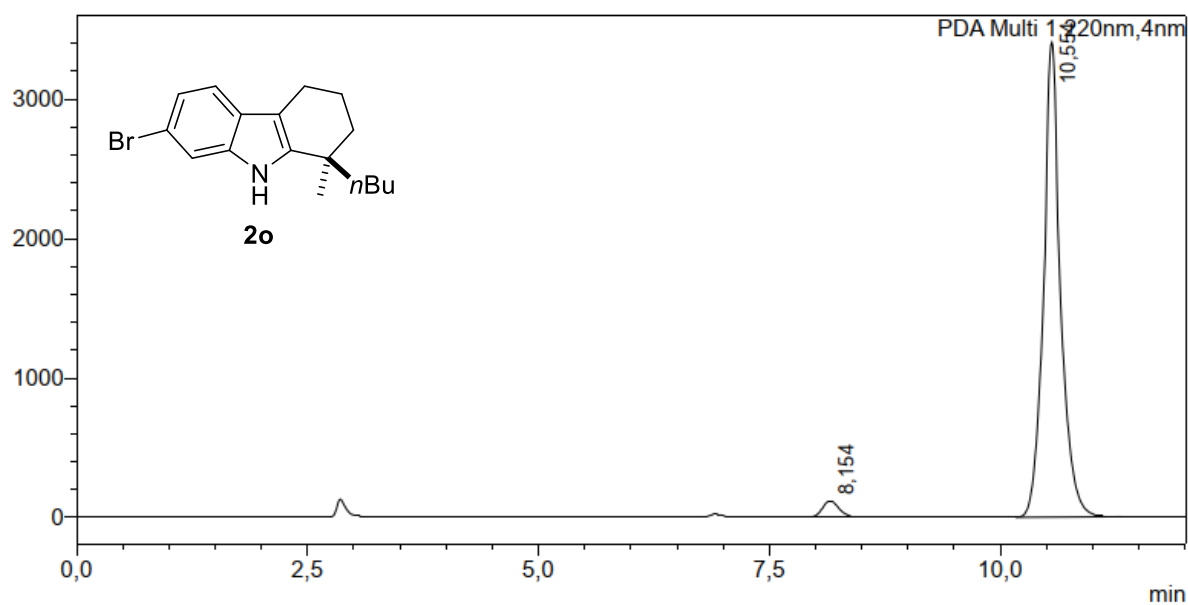

### <Peak Table>

PDA Ch1 220nm

| Peak# | Ret. Time | Area     | Area%   | Height  | Name |
|-------|-----------|----------|---------|---------|------|
| 1     | 8,154     | 1546750  | 3,427   | 120182  |      |
| 2     | 10,554    | 43592129 | 96,573  | 3405550 |      |
| Total |           | 45138879 | 100,000 | 3525733 |      |

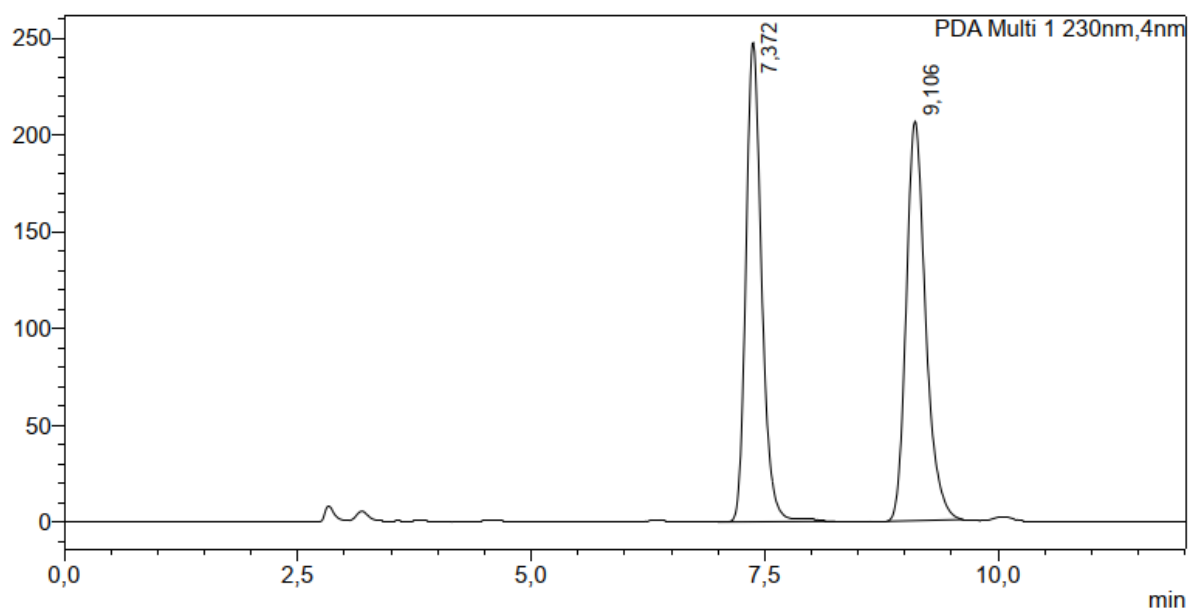

### <Peak Table>

PDA Ch1 230nm

| Peak# | Ret. Time | Area    | Area%   | Height | Name |
|-------|-----------|---------|---------|--------|------|
| 1     | 7,372     | 2905287 | 49,339  | 247493 |      |
| 2     | 9,106     | 2983156 | 50,661  | 206308 |      |
| Total |           | 5888442 | 100,000 | 453801 |      |

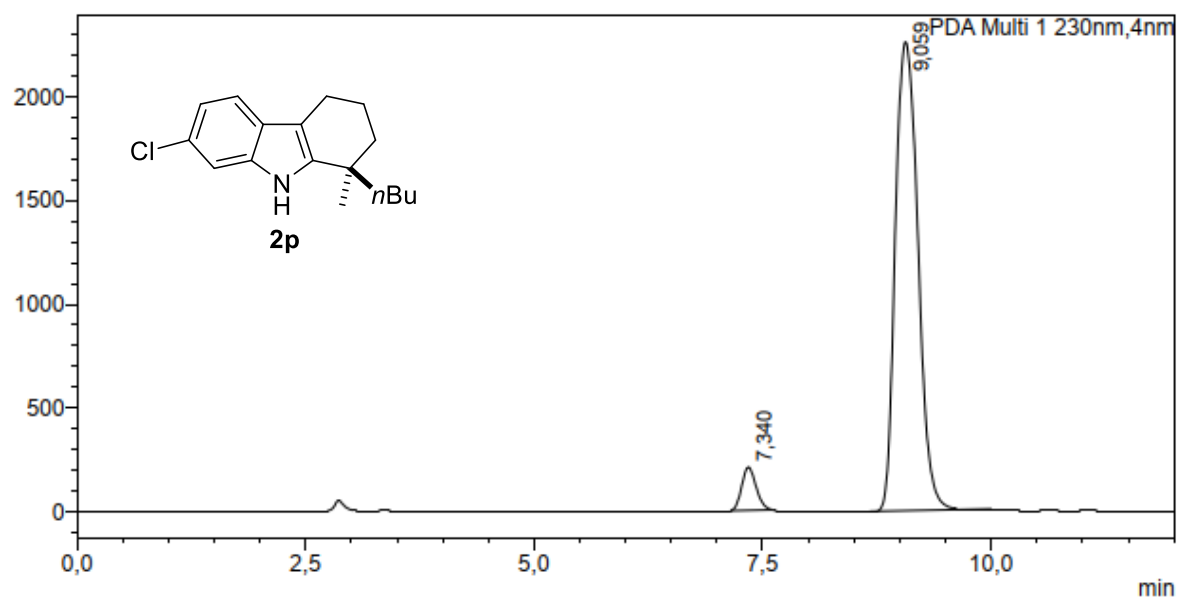

### <Peak Table>

PDA Ch1 230nm

| Peak# | Ret. Time | Area     | Area%   | Height  | Name |
|-------|-----------|----------|---------|---------|------|
| 1     | 7,340     | 2283562  | 5,553   | 207902  |      |
| 2     | 9,059     | 38842440 | 94,447  | 2258741 |      |
| Total |           | 41126003 | 100,000 | 2466643 |      |

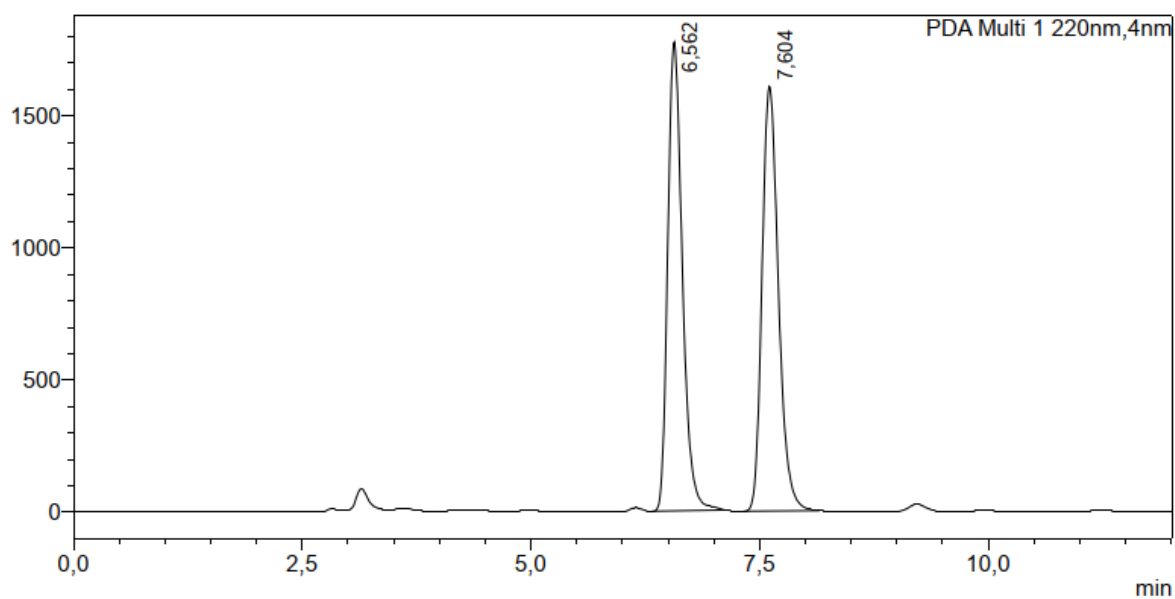

### <Peak Table>

PDA Ch1 220nm

| Peak# | Ret. Time | Area     | Area%   | Height  | Name |
|-------|-----------|----------|---------|---------|------|
| 1     | 6,562     | 19690920 | 49,607  | 1774505 |      |
| 2     | 7,604     | 20003040 | 50,393  | 1607242 |      |
| Total |           | 39693959 | 100,000 | 3381748 |      |

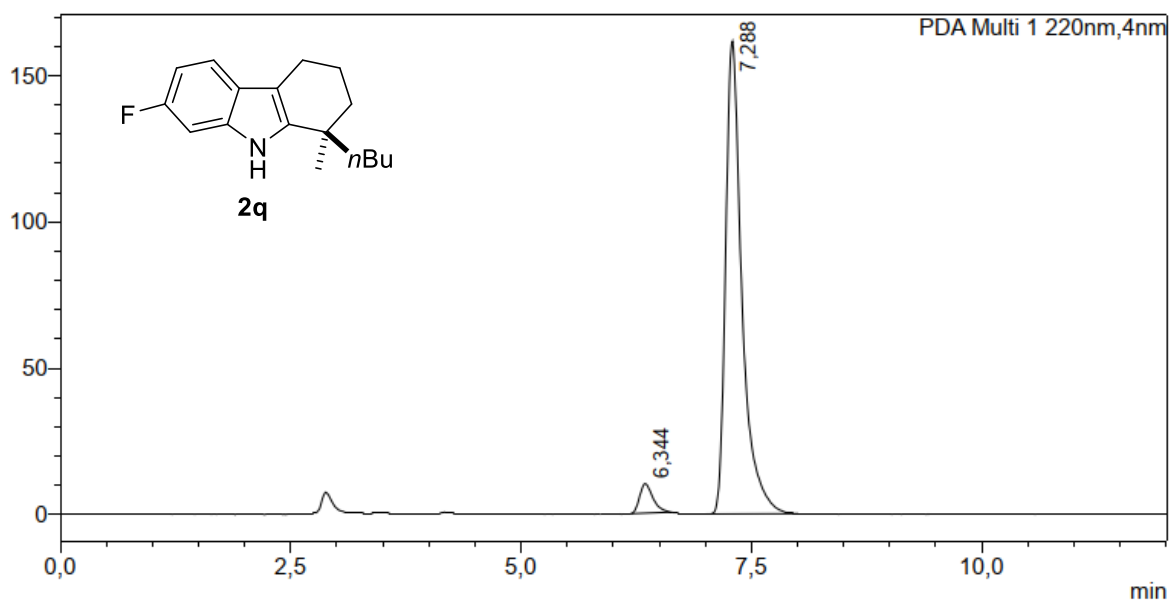

### <Peak Table>

PDA Ch1 220nm

| Peak# | Ret. Time | Area    | Area%   | Height | Name |
|-------|-----------|---------|---------|--------|------|
| 1     | 6,344     | 101443  | 4,849   | 10051  |      |
| 2     | 7,288     | 1990808 | 95,151  | 161546 |      |
| Total |           | 2092251 | 100,000 | 171597 |      |

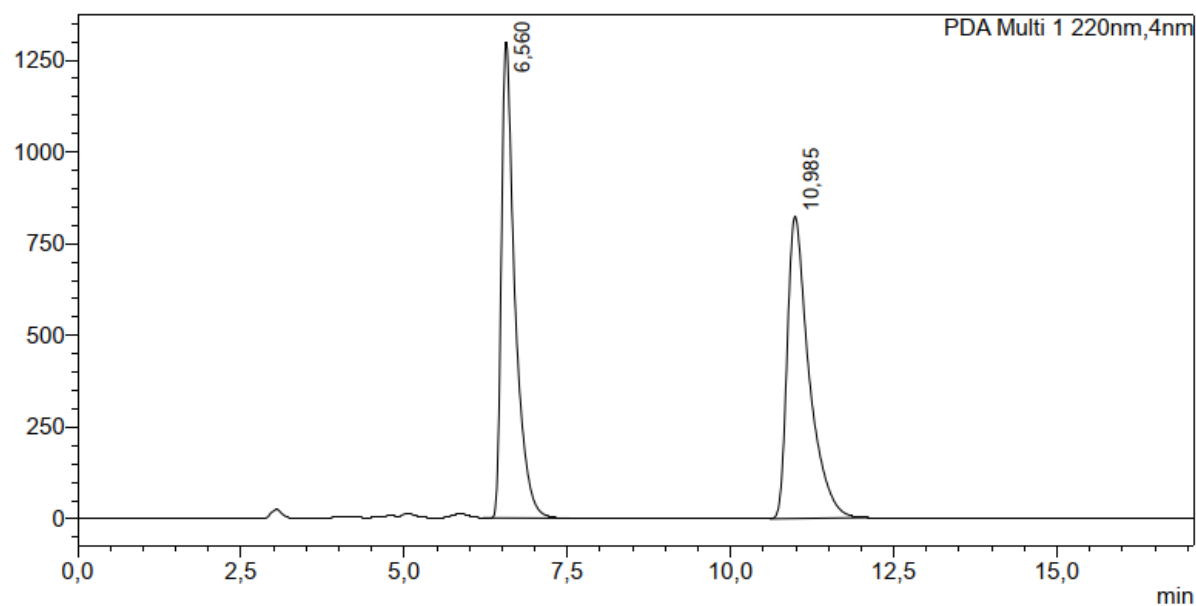

### <Peak Table>

PDA Ch1 220nm

| Peak# | Ret. Time | Area     | Area%   | Height  | Name |
|-------|-----------|----------|---------|---------|------|
| 1     | 6,560     | 18737260 | 49,510  | 1298200 |      |
| 2     | 10,985    | 19108510 | 50,490  | 822725  |      |
| Total |           | 37845770 | 100,000 | 2120925 |      |

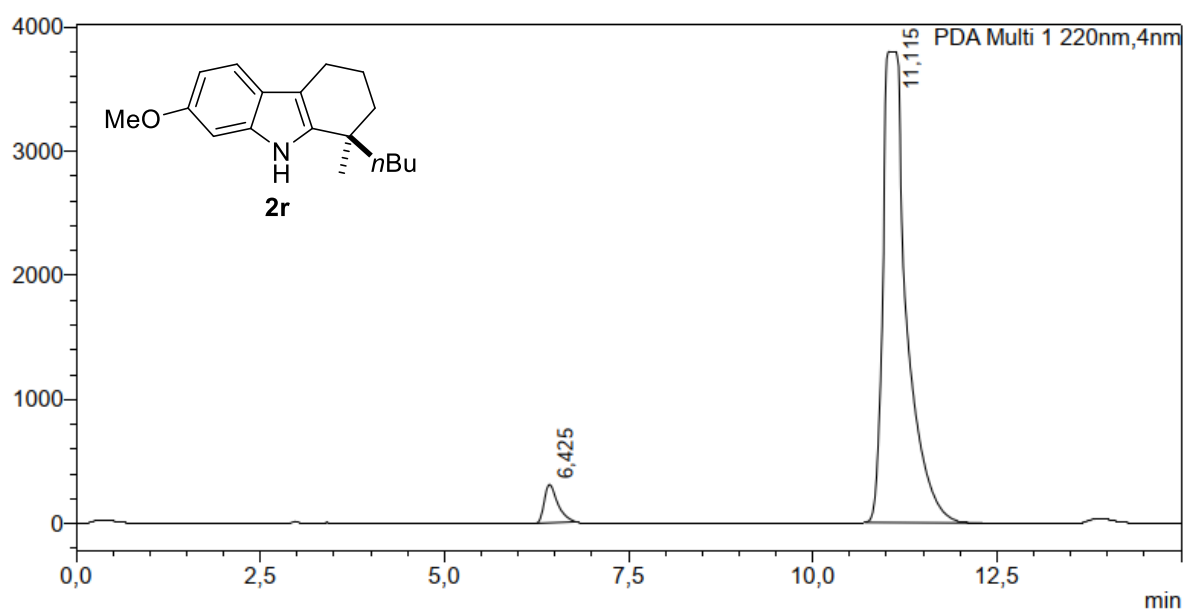

### <Peak Table>

PDA Ch1 220nm

| Peak# | Ret. Time | Area     | Area%   | Height  | Name |
|-------|-----------|----------|---------|---------|------|
| 1     | 6,425     | 3922393  | 4,389   | 309181  |      |
| 2     | 11,115    | 85443278 | 95,611  | 3801258 |      |
| Total |           | 89365671 | 100,000 | 4110439 |      |

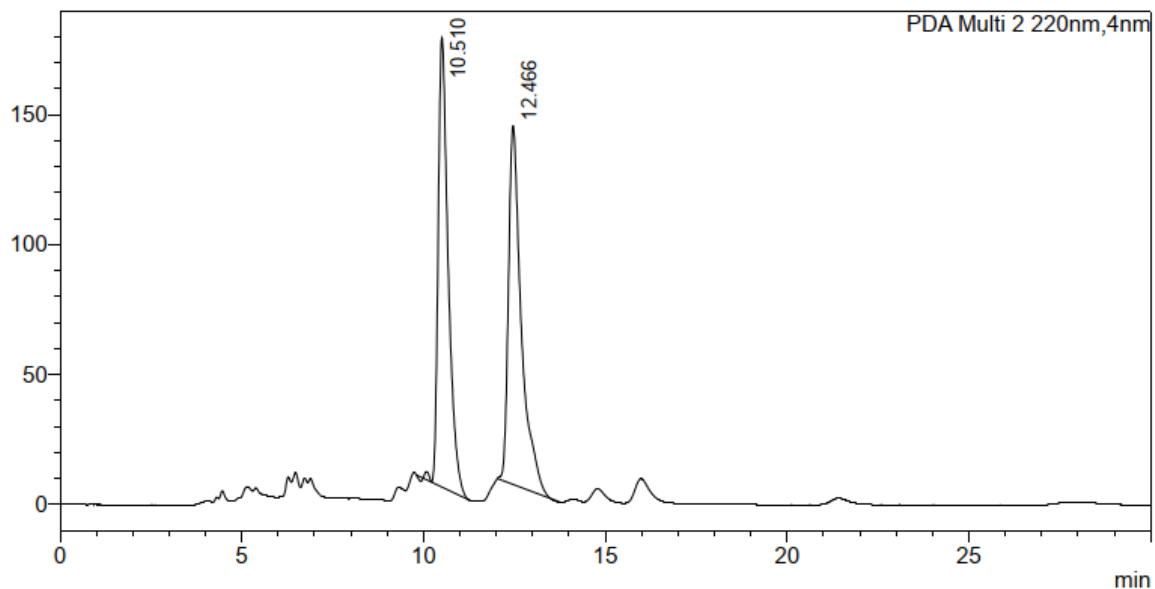

<Peak Table>

PDA Ch2 220nm

| Peak# | Ret. Time | Area    | Area%   | Height | Name |
|-------|-----------|---------|---------|--------|------|
| 1     | 10.510    | 3312486 | 49.515  | 172791 |      |
| 2     | 12.466    | 3377320 | 50.485  | 137783 |      |
| Total |           | 6689807 | 100.000 | 310574 |      |

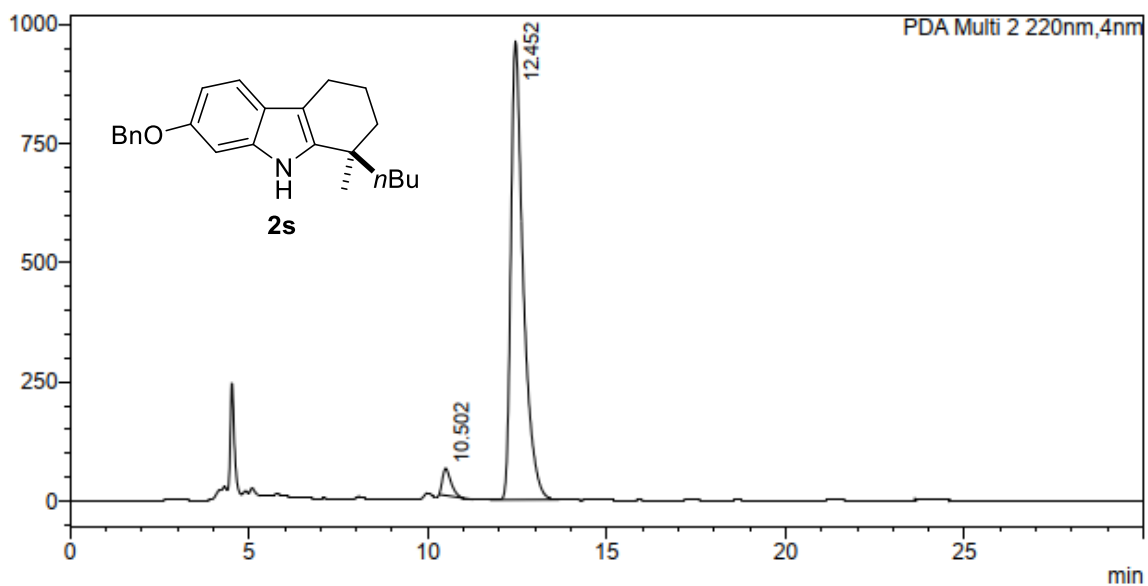

<Peak Table>

PDA Ch2 220nm

| Peak# | Ret. Time | Area     | Area%   | Height  | Name |
|-------|-----------|----------|---------|---------|------|
| 1     | 10.502    | 928395   | 3.863   | 56355   |      |
| 2     | 12.452    | 23105518 | 96.137  | 960388  |      |
| Total |           | 24033913 | 100.000 | 1016743 |      |

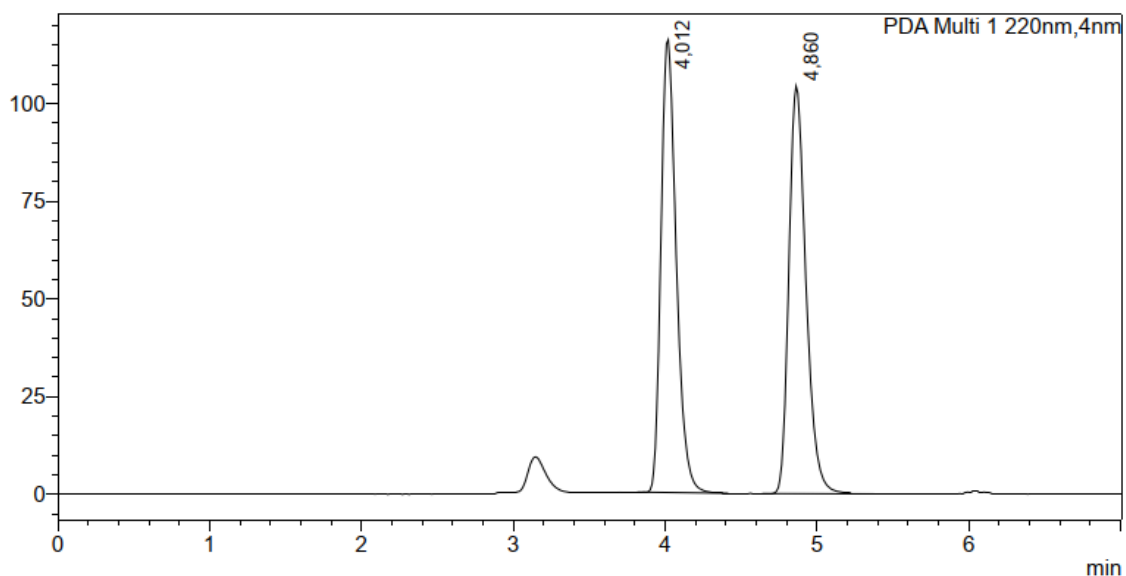

### <Peak Table>

PDA Ch1 220nm

| Peak# | Ret. Time | Area    | Area%   | Height | Name |
|-------|-----------|---------|---------|--------|------|
| 1     | 4.012     | 813969  | 49.965  | 115962 |      |
| 2     | 4.860     | 815110  | 50.035  | 104302 |      |
| Total |           | 1629079 | 100.000 | 220264 |      |

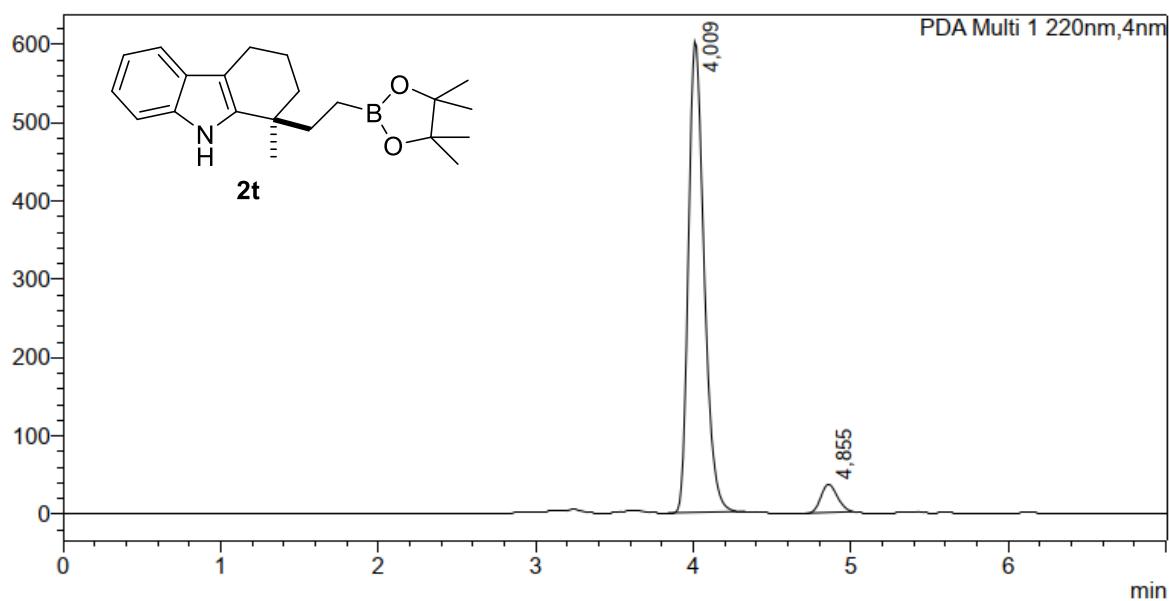

### <Peak Table>

PDA Ch1 220nm

| Peak# | Ret. Time | Area    | Area%   | Height | Name |
|-------|-----------|---------|---------|--------|------|
| 1     | 4.009     | 4162256 | 94.125  | 601331 |      |
| 2     | 4.855     | 259817  | 5.875   | 35785  |      |
| Total |           | 4422073 | 100.000 | 637116 |      |

mAU

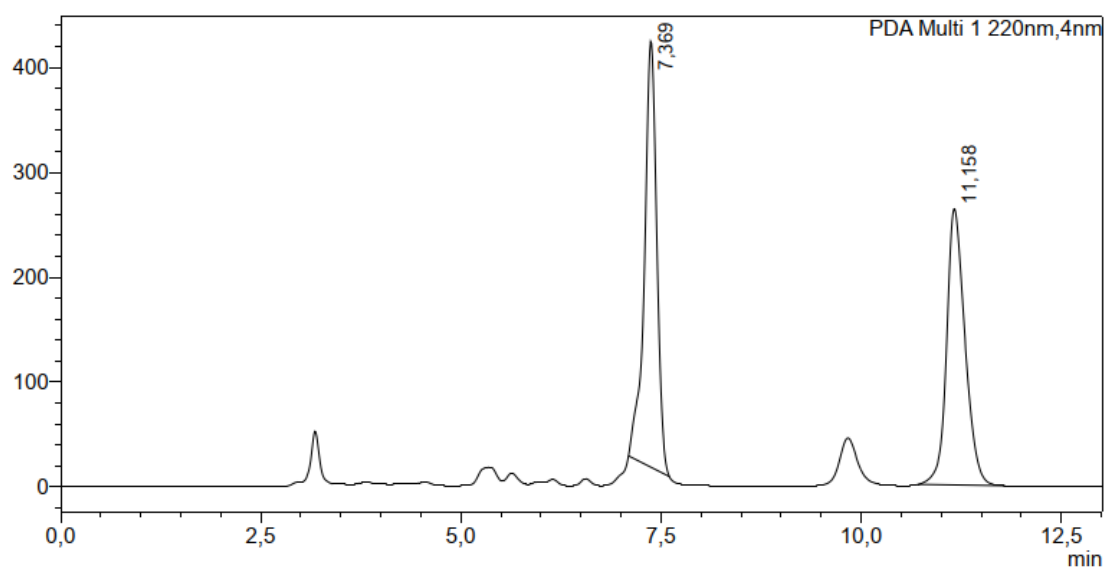

### <Peak Table>

PDA Ch1 220nm

| Peak# | Ret. Time | Area    | Area%   | Height | Name |
|-------|-----------|---------|---------|--------|------|
| 1     | 7,369     | 4334297 | 50,822  | 405738 |      |
| 2     | 11,158    | 4194088 | 49,178  | 263174 |      |
| Total |           | 8528385 | 100,000 | 668912 |      |

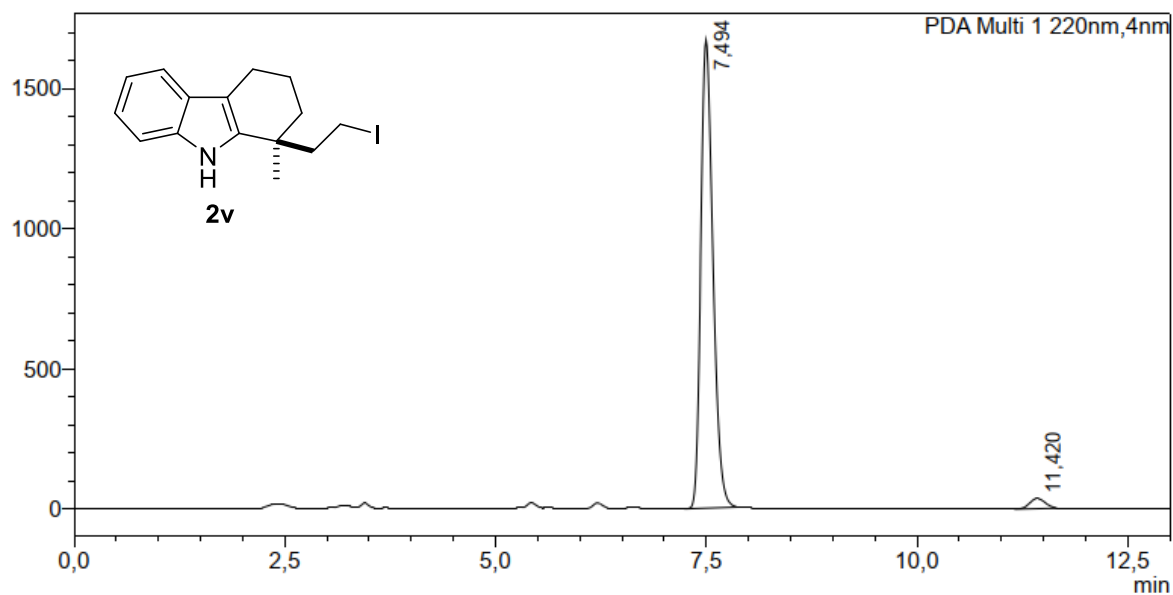

### <Peak Table>

PDA Ch1 220nm

| Peak# | Ret. Time | Area     | Area%   | Height  | Name |
|-------|-----------|----------|---------|---------|------|
| 1     | 7,494     | 16744702 | 97,319  | 1670506 |      |
| 2     | 11,420    | 461232   | 2,681   | 35841   |      |
| Total |           | 17205934 | 100,000 | 1706347 |      |

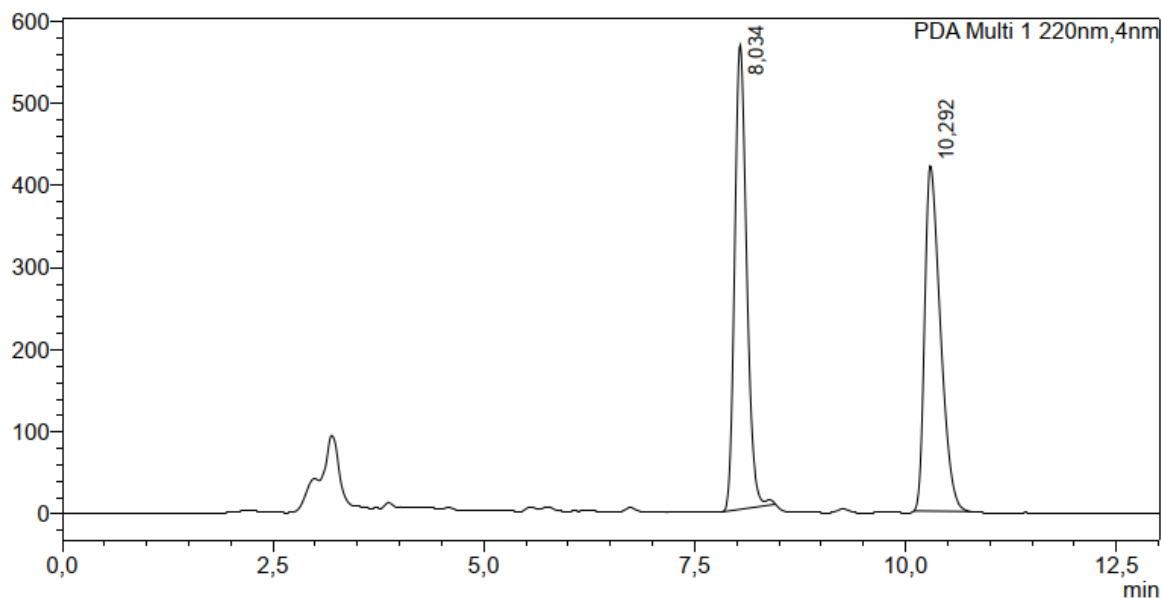

### <Peak Table>

PDA Ch1 220nm

| Peak# | Ret. Time | Area     | Area%   | Height | Name |
|-------|-----------|----------|---------|--------|------|
| 1     | 8,034     | 5559367  | 50,314  | 565582 |      |
| 2     | 10,292    | 5489953  | 49,686  | 420178 |      |
| Total |           | 11049319 | 100,000 | 985761 |      |

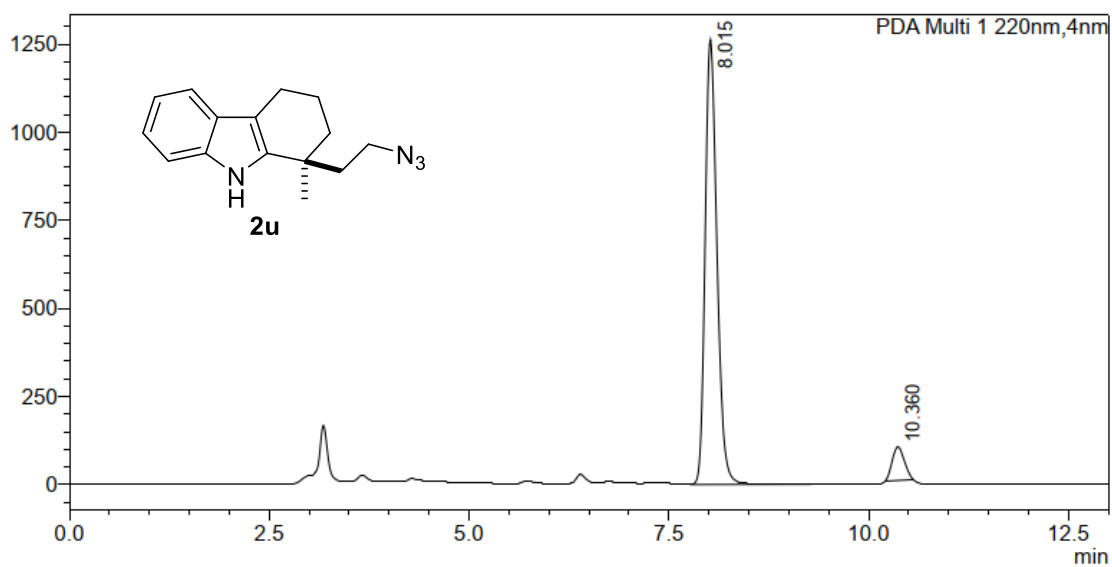

### <Peak Table>

PDA Ch1 220nm

| Peak# | Ret. Time | Area     | Area%   | Height  | Name |
|-------|-----------|----------|---------|---------|------|
| 1     | 8.015     | 12921517 | 92.725  | 1262075 |      |
| 2     | 10.360    | 1013859  | 7.275   | 94736   |      |
| Total |           | 13935376 | 100.000 | 1356810 |      |

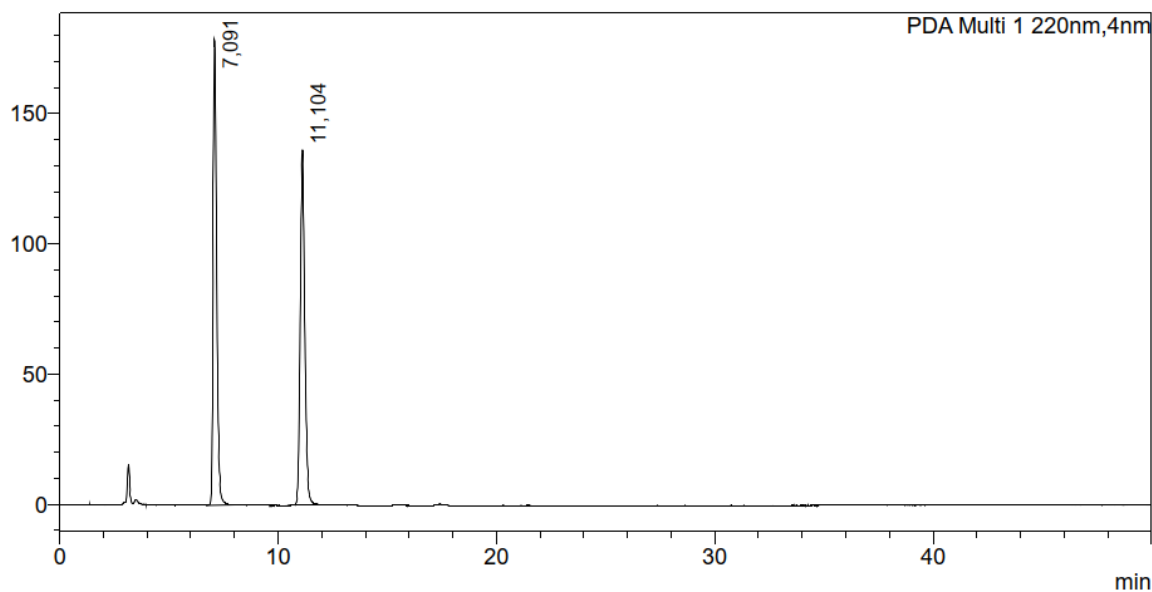

### <Peak Table>

PDA Ch1 220nm

| Peak# | Ret. Time | Area    | Area%   | Height | Name |
|-------|-----------|---------|---------|--------|------|
| 1     | 7,091     | 1985369 | 49,882  | 178897 |      |
| 2     | 11,104    | 1994798 | 50,118  | 136250 |      |
| Total |           | 3980167 | 100,000 | 315147 |      |

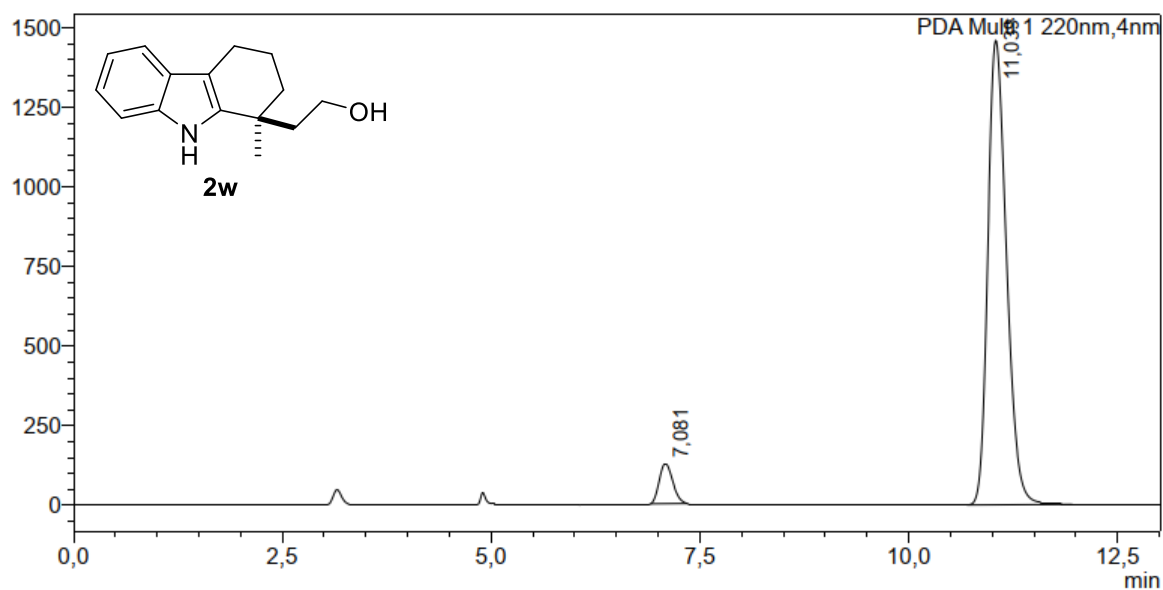

### <Peak Table>

PDA Ch1 220nm

| Peak# | Ret. Time | Area     | Area%   | Height  | Name |
|-------|-----------|----------|---------|---------|------|
| 1     | 7,081     | 1415777  | 5,888   | 126313  |      |
| 2     | 11,039    | 22628864 | 94,112  | 1457819 |      |
| Total |           | 24044642 | 100,000 | 1584132 |      |

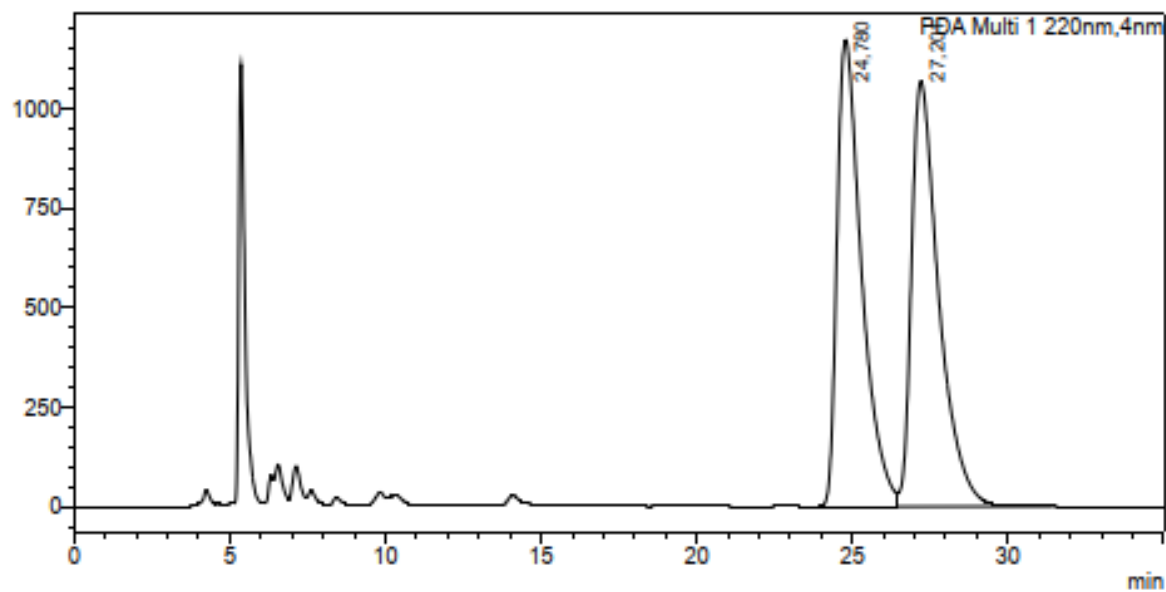

### <Peak Table>

PDA Ch1 220nm

| Peak# | Ret. Time | Area      | Area%   | Height  | Name |
|-------|-----------|-----------|---------|---------|------|
| 1     | 24.780    | 64547983  | 49.661  | 1172403 |      |
| 2     | 27.201    | 65428664  | 50.339  | 1067687 |      |
| Total |           | 129976627 | 100.000 | 2240091 |      |

mAU

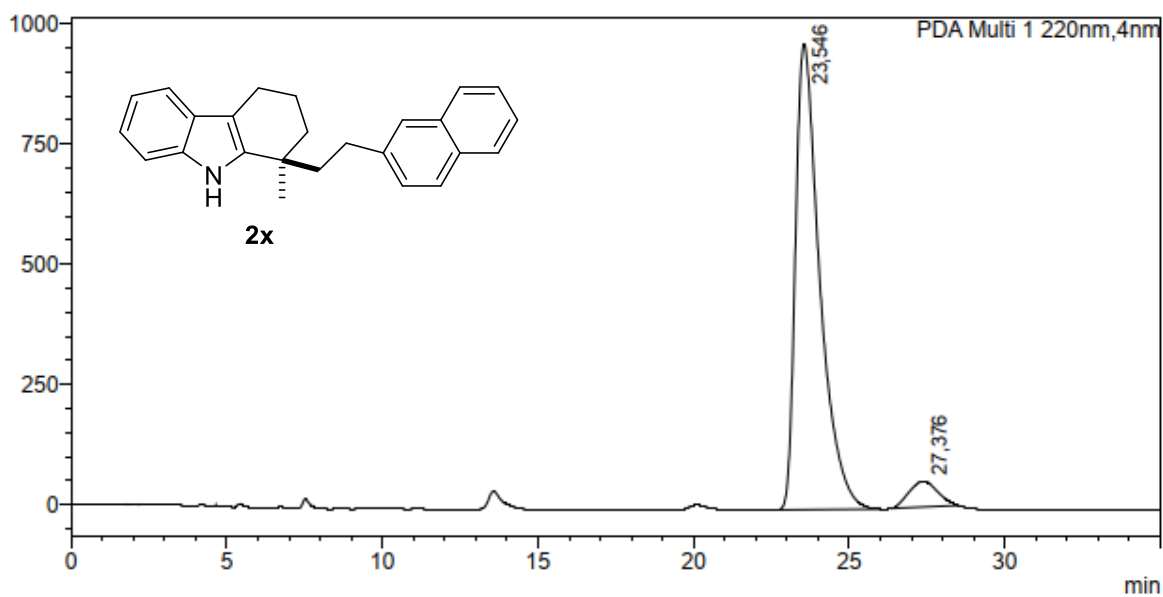

### <Peak Table>

PDA Ch1 220nm

| Peak# | Ret. Time | Area     | Area%   | Height  | Name |
|-------|-----------|----------|---------|---------|------|
| 1     | 23.546    | 52538878 | 93.838  | 968883  |      |
| 2     | 27.376    | 3450098  | 6.162   | 53451   |      |
| Total |           | 55988976 | 100.000 | 1022334 |      |

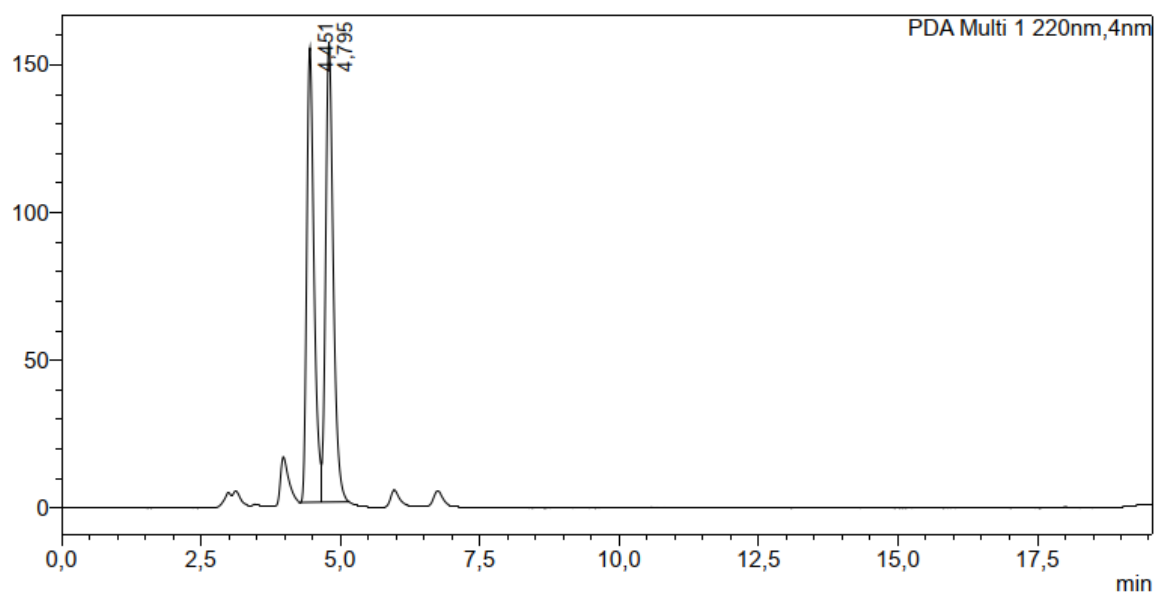

### <Peak Table>

PDA Ch1 220nm

| Peak# | Ret. Time | Area    | Area%   | Height | Name |
|-------|-----------|---------|---------|--------|------|
| 1     | 4,451     | 1380860 | 48,452  | 153628 |      |
| 2     | 4,795     | 1469089 | 51,548  | 155791 |      |
| Total |           | 2849949 | 100,000 | 309418 |      |

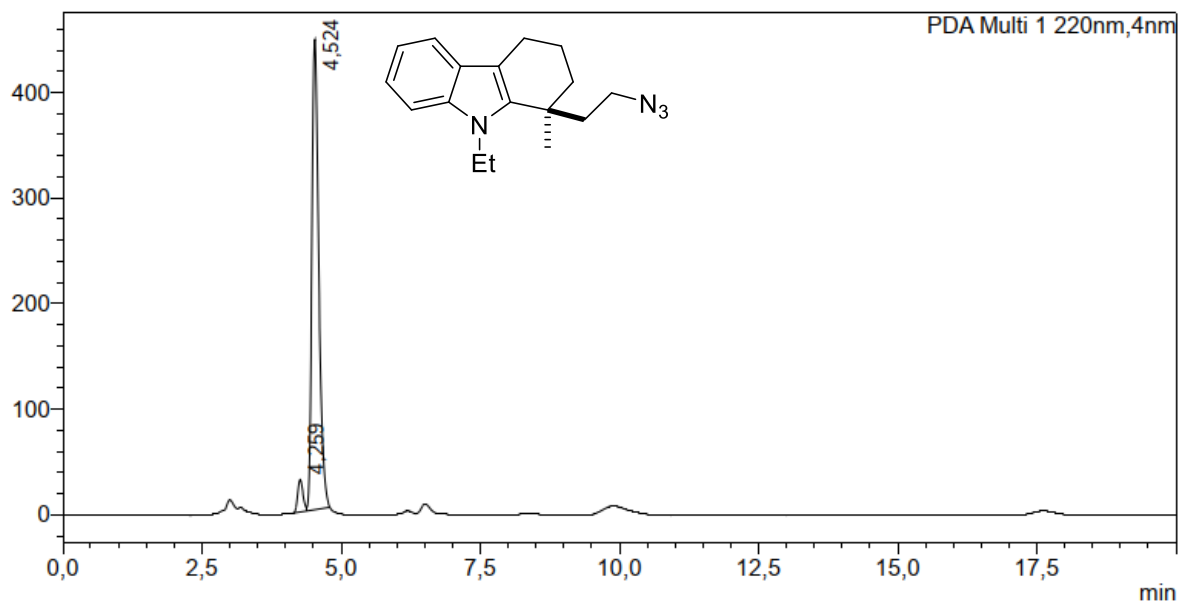

### <Peak Table>

PDA Ch1 220nm

| Peak# | Ret. Time | Area    | Area%   | Height | Name |
|-------|-----------|---------|---------|--------|------|
| 1     | 4,259     | 201437  | 5,000   | 30640  |      |
| 2     | 4,524     | 3826934 | 95,000  | 445381 |      |
| Total |           | 4028371 | 100,000 | 476021 |      |

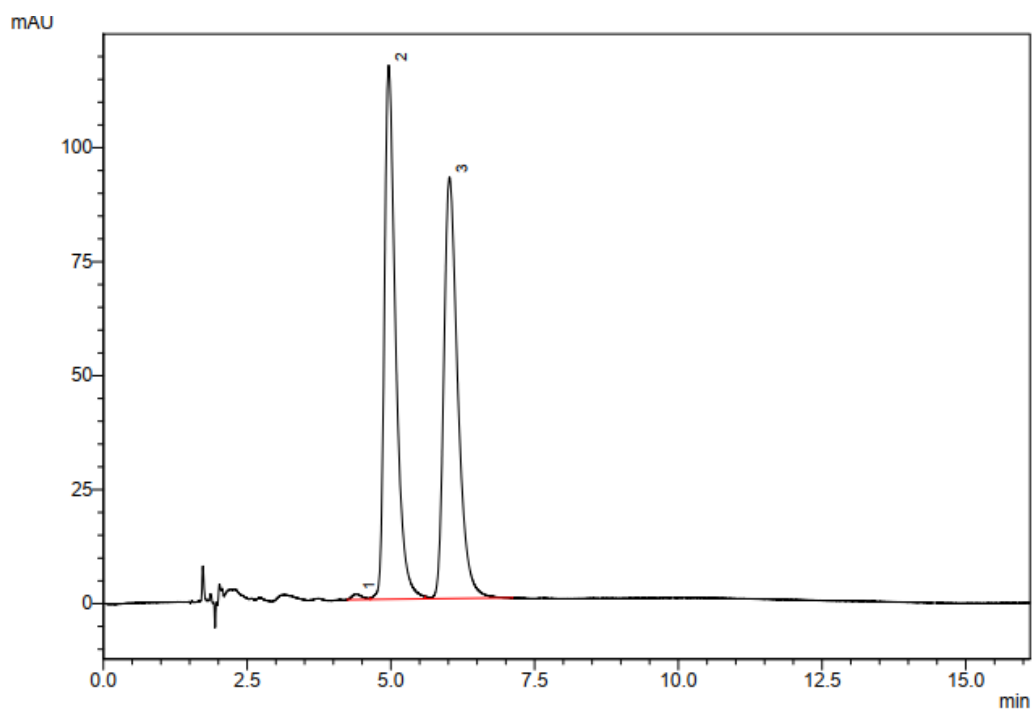

1 220nm,4nm

| Peak # | Ret. Time | Area % | Name          | Width at 50% Height | Separation Factor |
|--------|-----------|--------|---------------|---------------------|-------------------|
| 1      | 4.40      | 0.48   |               | 0.192               | —                 |
| 2      | 4.96      | 50.35  | 1. Enantiomer | 0.200               | 1.21              |
| 3      | 6.02      | 49.17  | 2. Enantiomer | 0.251               | 1.33              |
| Total  |           | 100.00 |               |                     |                   |

R = 2.77

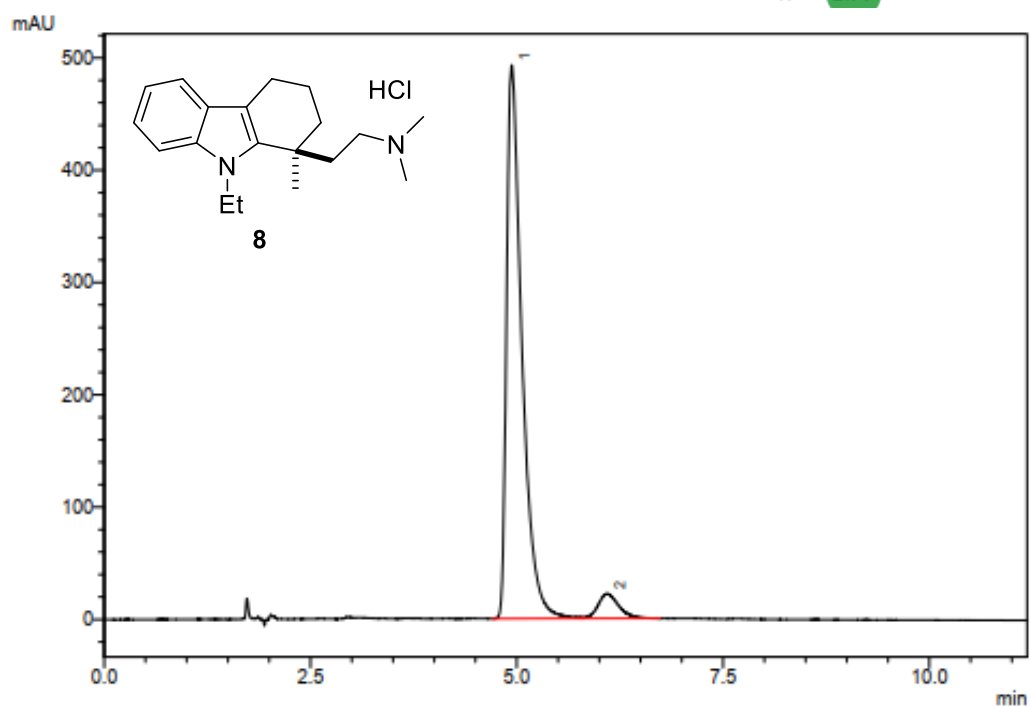

1 220nm,4nm

| Peak # | Ret. Time | Area % | Name          | ee = 88.5% |
|--------|-----------|--------|---------------|------------|
| 1      | 4.94      | 94.26  | 1. Enantiomer |            |
| 2      | 6.10      | 5.74   | 2. Enantiomer |            |
| Total  |           | 100.00 |               |            |

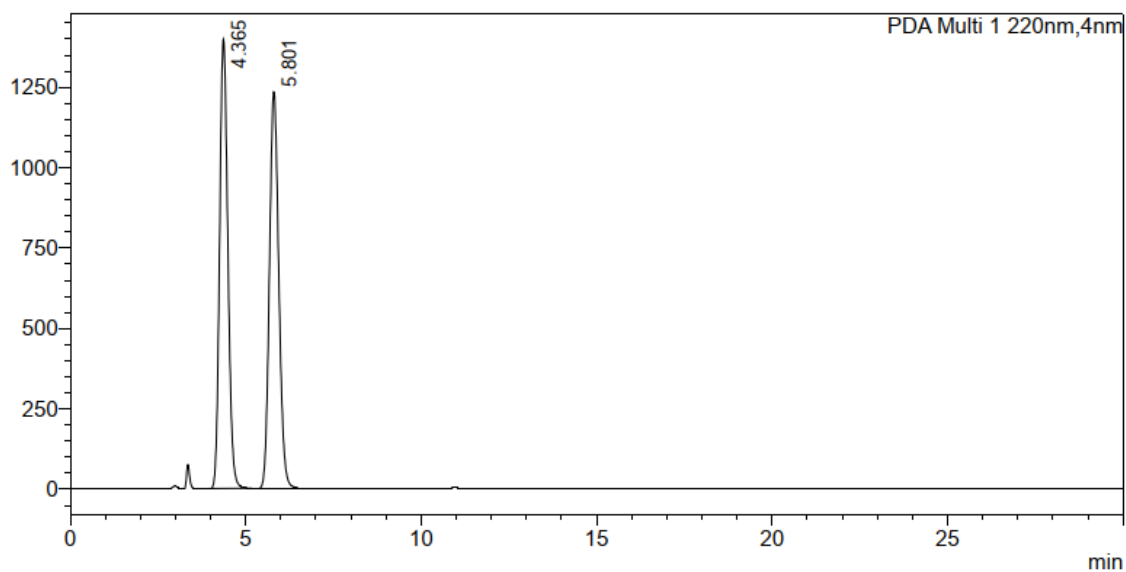

### <Peak Table>

PDA Ch1 220nm

| Peak# | Ret. Time | Area     | Area%   | Height  | Name |
|-------|-----------|----------|---------|---------|------|
| 1     | 4.365     | 22838271 | 50.058  | 1397256 |      |
| 2     | 5.801     | 22785297 | 49.942  | 1232723 |      |
| Total |           | 45623568 | 100.000 | 2629979 |      |

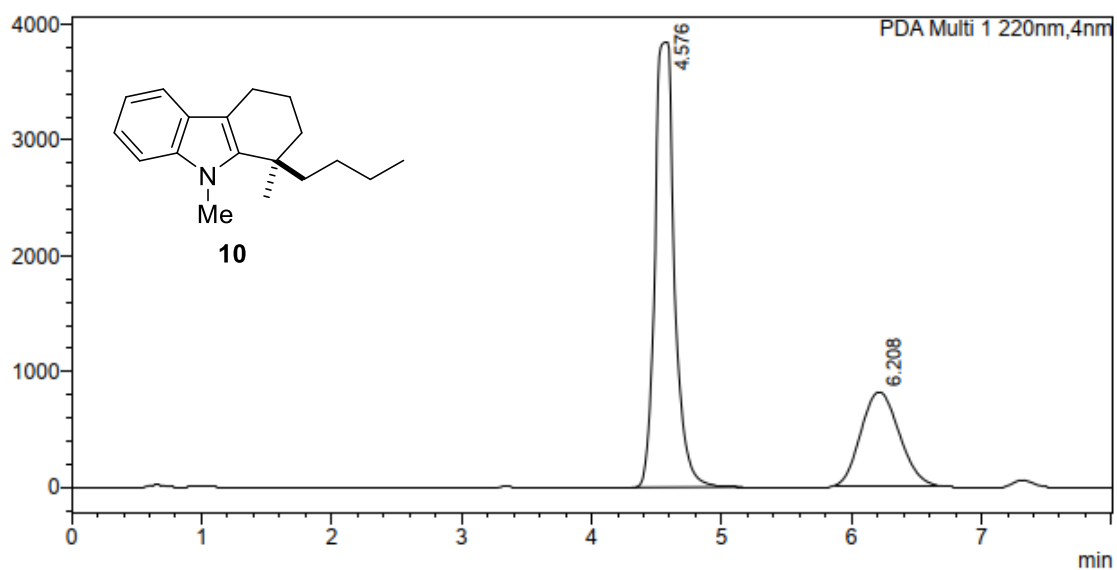

### <Peak Table>

PDA Ch1 220nm

| Peak# | Ret. Time | Area     | Area%   | Height  | Name |
|-------|-----------|----------|---------|---------|------|
| 1     | 4.576     | 40369654 | 71.225  | 3841556 |      |
| 2     | 6.208     | 16309110 | 28.775  | 806288  |      |
| Total |           | 56678764 | 100.000 | 4647844 |      |

mAU

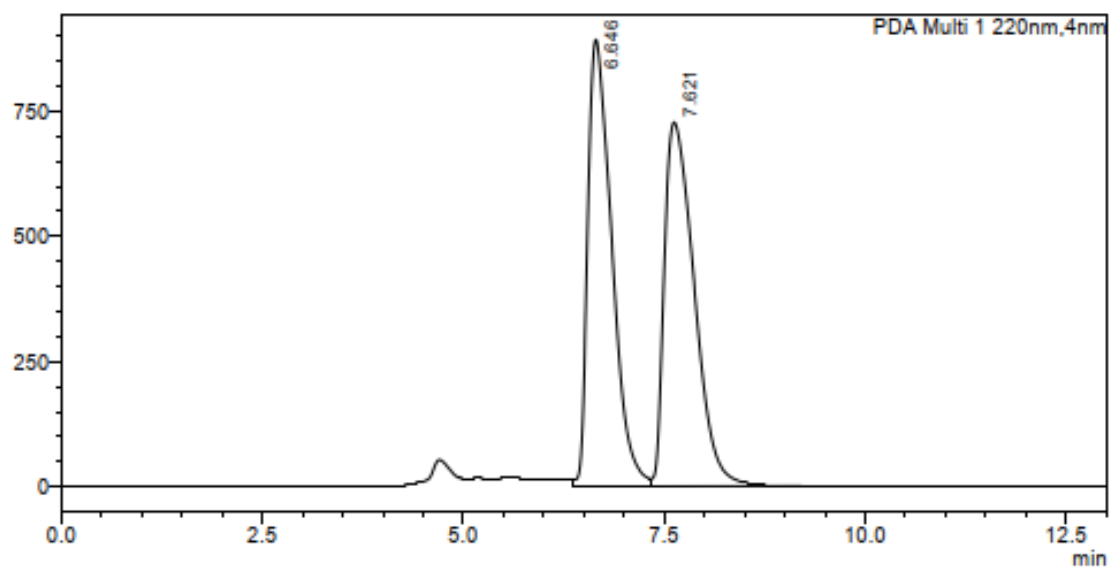

## &lt;Peak Table&gt;

PDA Ch1 220nm

| Peak# | Ret. Time | Area     | Area%   | Height  | Name |
|-------|-----------|----------|---------|---------|------|
| 1     | 6.646     | 18530780 | 49.566  | 892571  |      |
| 2     | 7.621     | 18855284 | 50.434  | 727128  |      |
| Total |           | 37386064 | 100.000 | 1619699 |      |

mAU

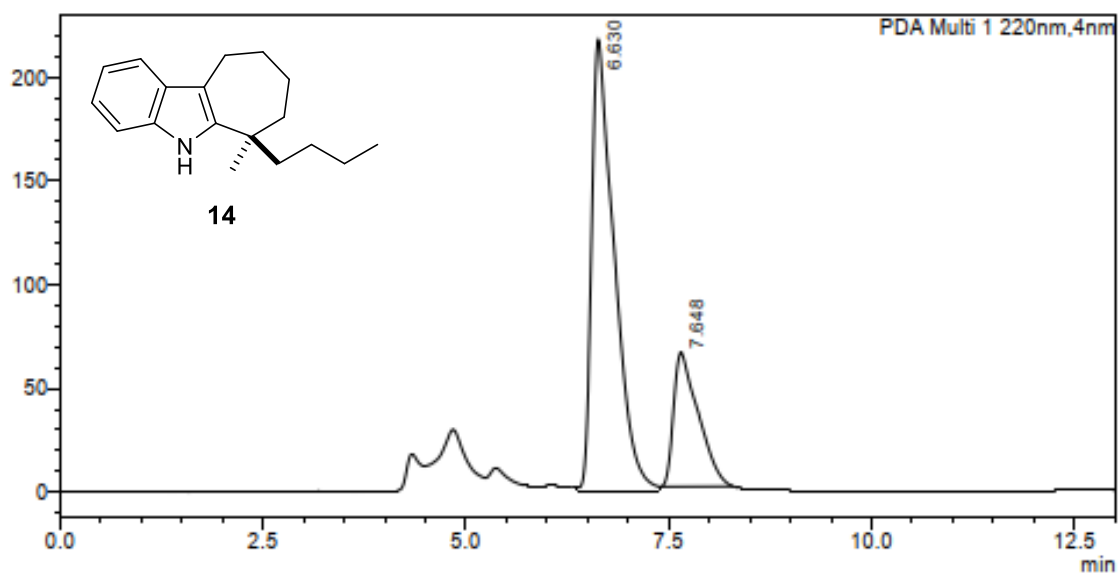

## &lt;Peak Table&gt;

PDA Ch1 220nm

| Peak# | Ret. Time | Area    | Area%   | Height | Name |
|-------|-----------|---------|---------|--------|------|
| 1     | 6.630     | 4222569 | 75.539  | 217476 |      |
| 2     | 7.648     | 1367346 | 24.461  | 64303  |      |
| Total |           | 5589914 | 100.000 | 281779 |      |

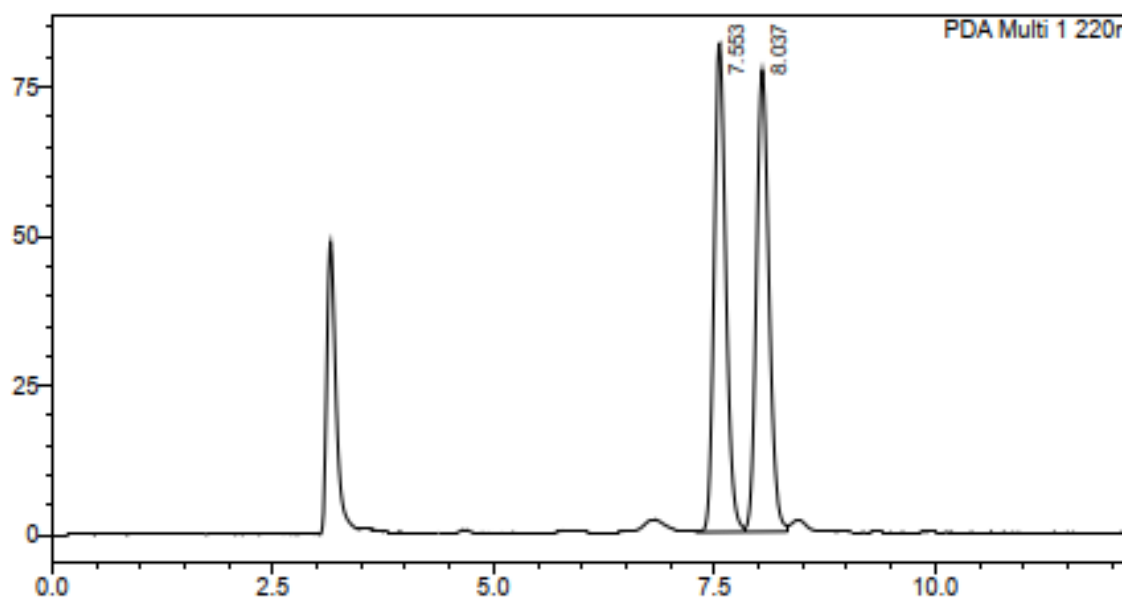

# <Peak Table>

PDA Ch1 220nm

| Peak# | Ret. Time | Area    | Area%   | Height | Name |
|-------|-----------|---------|---------|--------|------|
| 1     | 7.553     | 764757  | 50.163  | 81697  |      |
| 2     | 8.037     | 759787  | 49.837  | 77175  |      |
| Total |           | 1524543 | 100.000 | 158872 |      |

mAU

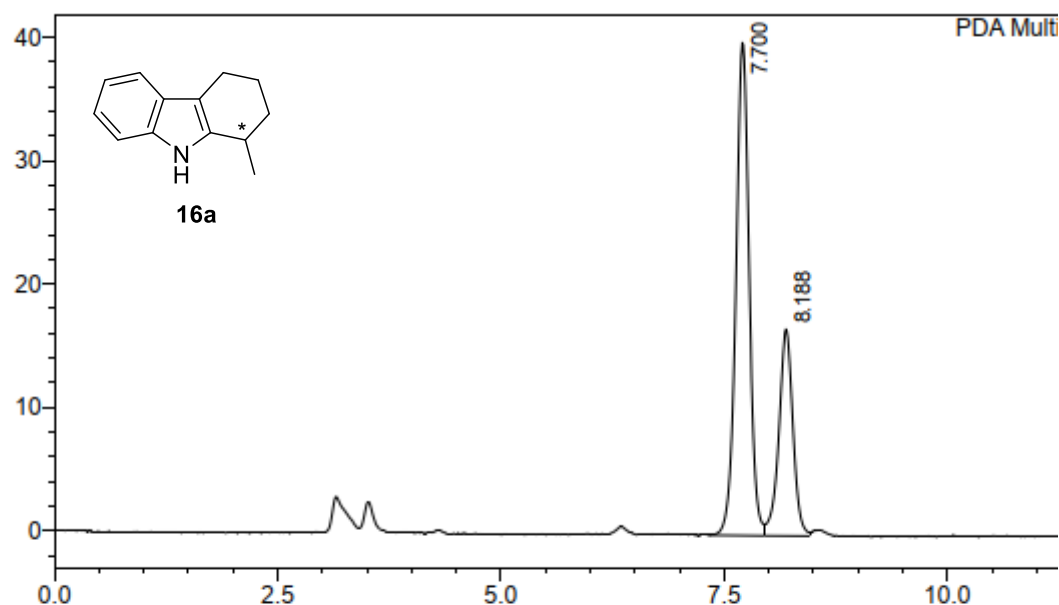

# <Peak Table>

PDA Ch1 220nm

| Peak# | Ret. Time | Area   | Area%   | Height | Name |
|-------|-----------|--------|---------|--------|------|
| 1     | 7.700     | 411384 | 68.966  | 39890  |      |
| 2     | 8.188     | 185122 | 31.034  | 16704  |      |
| Total |           | 596505 | 100.000 | 56594  |      |

## 11. Reference and notes

- 
- <sup>1</sup> Tsuji, N.; Kennemur, J. L.; Buyck, T.; Lee, S.; Prévost, S.; Kaib, P. S. J.; Bykov, D.; Farès, C.; List, B. *Science* **2018**, *359*, 1501–1505.
- <sup>2</sup> Kaib, P. S. J.; List, B. *Synlett* **2016**, *27*, 156–158.
- <sup>3</sup> Nakano, T.; Shirai, H.; Tamagawa, H.; Ishii, Y.; Ogawa, M. *J. Org. Chem.*, **1988**, *53*, 5181–5183
- <sup>4</sup> a) Yamaguchi, T.; Inagawa, T.; Nakazumi, H.; Irie, S.; Irie, M. *J. Mater. Chem*, **2001**, *11*, 2453–2458; b) Hiromichi, E.; Tsutomu, K. *J. Am. Chem. Soc*, **2009**, *131*, 6082–6083.
- <sup>5</sup> Zhou, H.; Bae, H. Y.; Leutzsch, M.; Kennemur, J. L.; Bécart, D.; List, B. *J. Am. Chem. Soc*, **2020**, *142*, 13695–13700.
- <sup>6</sup> Mei, G.; Yuan, H.; Gu, Y.; Chen, W.; Chung, L-W.; Li, C-C. *Angew. Chem. Int. Ed.* **2014**, *53*, 11051–11055.
- <sup>7</sup> The crude ketone was directly used as starting material without isolation.
- <sup>8</sup> Mclaughlin, E.; Norman, M.; Ko, T.; Stolt, I. *Tetrahedron Letters*, **2014**, 2609–2611.
- <sup>9</sup> Hansen, C.; Ohm, R.; Olsen, L.; Ascic, E.; Tanner, D.; Nielsen, T. *Org. Lett*, **2016**, *18*, 5990–5993
- <sup>10</sup> Yadav, S. J.; Abraham, S.; Reddy, B.; Sabitha, G. *Synthesis*, **2001**, 2165–2169.
- <sup>11</sup> Itoh, T.; Uehara, H.; Ogiso, K.; Nomura, S.; Hayase, S.; Kawatsura, M. *Chem. Lett.* **2007**, *36*, 50–51
- <sup>12</sup> Youn, S-W.; Pastine, S, J.; Sames, D. *Org. Lett.*, **2004**, *6*, 584–584.
- <sup>13</sup> Lim, B.; Jung, B.; Cho, C. *Org. Lett.*, **2014**, *16*, 4492–4495.
- <sup>14</sup> Gao, Y.; Li, J.; Bai, S.; Tu, D.; Yang, C.; Ye, Z.; Hu, B.; Qi, X.; Jiang, C.; *Org. Chem. Front.*, **2020**, *7*, 1149–1157.
